# Supplementary material for: SIDISH Identifies High-Risk Disease-Associated Cells and Biomarkers by Integrating Single-Cell Depth and Bulk Breadth
Source: Research Square preprint supplement (doi:10.21203/rs.3.rs-5921999/v1), 2025-03-10
Supplement: Supplementary file 1 [file 0a93c44d156ec1f97504df3f.xlsx]

## Sheet: Descriptions
Descriptions
1. Gene Perturbation Scores: Perturbation score for each gene in BRCA scRNA-seq dataset, representing the impact ofknockinh out a specific genes, on the transition of High-Risk cells to Background cells.
2. Marker Gene P value: provides the p-values from the chi-square test for each gene, assessing the statistical significance of these transitions. Significant P values (P < 0.05) indicate genes with a meaningful effect on the transition of High-Risk cells, highlighting their potential relevance as therapeutic targets.

## Sheet: 1.Gene perturbation scores
Gene	Perturbation Score
FN1	46.4332
ITGA5	46.2529
ITGB5	45.6863
CTNNB1	45.2743
KDR	44.1154
ITGA1	43.8578
MMP2	43.7291
LAMA5	43.6003
ITGA11	43.4715
CDH5	43.2913
BCAR1	42.3126
MEF2C	42.0036
LAMC1	41.231
IL6	40.922
CTLA4	40.8962
IGF1R	40.8962
LAMA3	40.8962
NOTCH1	40.7932
LAMB1	40.7159
EFNB1	40.5099
LAMB3	40.2266
MYC	39.8661
SNAI1	39.8403
PTEN	39.7116
VCAM1	39.6858
LAMA4	39.6858
MAPK11	39.6343
PTK2	39.4283
LAMB2	39.1707
PECAM1	39.0935
ITGA6	38.3466
AGRN	38.3209
GNAI1	38.1664
COL1A1	37.5998
FLT1	37.0847
COL1A2	36.8272
JAM3	36.1834
JAM2	36.1834
PTK2B	35.385
PDGFB	34.9215
LUM	34.4064
CXCL12	33.8656
NCK2	33.6595
IRS1	33.505
COL5A1	33.0672
COL6A1	33.0672
PDGFRB	32.7324
DCN	32.7324
FURIN	32.4491
TNS1	32.1143
SPARC	31.6508
CDH11	31.5993
FBN1	31.2645
DLL4	31.2387
COL4A1	31.007
EFNA1	30.9297
BLK	30.9039
POSTN	30.3889
TNF	30.2601
BGN	30.2344
ITGAX	30.2086
ITGAM	29.9511
IGF1	29.642
LOX	29.3845
COL6A3	29.127
CTGF	29.127
PTP4A3	29.1012
HGF	29.0755
FGF2	28.9982
SORBS1	28.6634
CXCL10	28.6119
DLK1	28.5346
UBE2C	28.5089
EFNB2	28.4831
CCL5	28.3801
CCL3	28.1226
CCL2	27.7878
CCL22	27.659
IFNG	27.247
IL1B	27.1955
F2R	27.144
SDC2	27.1182
PDGFRA	26.9122
SLC9A3R2	26.8864
MMP1	26.8092
IL10	26.7834
PLXND1	26.7834
MMP9	26.5774
IGF2	26.5001
CXCL8	26.3971
CCL4	26.1138
THBS2	26.0366
IGFBP3	25.882
CD8A	25.8305
FHL2	25.573
MMP14	24.9292
FCER1G	24.8519
FOXP3	24.7747
SPP1	24.6974
LIF	24.6716
MMP3	24.4399
FGFR1	24.2081
THBS1	24.0793
IL2RA	24.0021
IL7R	23.9763
SFN	23.9506
SAA1	23.7703
ZBTB16	23.7188
TGFB3	23.5127
FASLG	23.4612
PLAUR	23.178
CCL19	23.0492
CXCL2	22.9719
MMP7	22.9462
IGFBP5	22.8689
CD68	22.8689
CCL20	22.8432
A2M	22.8432
SERPINE1	22.6629
CD40	22.3796
EDIL3	22.3539
CD163	22.1478
NID1	21.9933
CXCL1	21.8645
NOTCH4	21.8388
CCR7	21.813
MMP16	21.7615
ELN	21.7358
WIPF3	21.6585
BMP2	21.6585
LCN2	21.5813
LBP	21.4267
DVL2	21.2465
PTGS2	21.1692
IL23A	21.1692
OSM	21.1434
TIMP1	21.0404
FBLN1	20.9632
FGB	20.9374
FGG	20.9374
FGA	20.9374
IL1RN	20.9117
FBLN2	20.7829
EDN1	20.6799
COL3A1	20.4481
OBSL1	20.3193
PLAU	20.2421
PPP1R12B	19.9845
WNT2	19.9588
CEBPB	19.9588
CSF1	19.933
YAP1	19.6755
PTPN13	19.5982
TLE4	19.5725
NOV	19.4952
PLK1	19.3922
SNAI2	19.3407
VCAN	19.315
GJA1	18.9802
CRYAB	18.7226
CDK1	18.5939
TGFBI	18.5166
MYLK	18.2848
KMT2D	18.2848
CXCL5	18.1303
PLAT	17.8985
CD34	17.6925
GSN	17.3062
BIRC5	17.1517
TAC1	17.1259
LEF1	17.0744
GNLY	17.0487
MMP11	16.9714
COL4A2	16.9199
HBEGF	16.8426
ANGPT1	16.8426
LIFR	16.7654
OSMR	16.7654
SMAD4	16.7654
NOTCH3	16.7396
LTA	16.6366
CD248	16.6109
TGM2	16.6109
PI3	16.6109
LTBP4	16.6109
CX3CR1	16.5079
CXCL6	16.5079
MYL9	16.4563
MYH11	16.4306
CCNB1	16.1988
CCNB2	16.1988
COL18A1	16.1731
CXCL3	16.0443
NEURL1B	16.0185
HEY2	16.0185
DLL1	16.0185
HEY1	16.0185
JAG2	16.0185
TWIST1	15.9928
FABP7	15.9413
BMP1	15.9155
GRB10	15.6322
PSMA2	15.6065
RHOC	15.555
PPARG	15.5292
HES1	15.5035
ENG	15.4777
HEYL	15.452
LEPR	15.4005
DKK1	15.3232
PRF1	15.2459
TIMP3	15.1687
JAG1	15.1429
VWF	15.0399
PPP1R14A	15.0142
GLIS2	14.9369
TGFB1I1	14.9369
COL5A2	14.8339
MGP	14.4733
TTN	14.4476
PTPRB	14.3446
COL6A2	14.2931
GZMB	14.2416
GPC1	13.9068
SPON2	13.881
TPM2	13.778
LMOD1	13.5977
IRF4	13.4947
TOP2A	13.4432
PPP1R12C	13.4432
MCM3	13.4175
PRKG1	13.3144
COL15A1	13.1342
ADAMTS2	13.1084
TLL1	13.0827
PLCG2	13.0312
HSPG2	12.9797
ACTG2	12.9024
CALD1	12.9024
NTRK2	12.9024
COL16A1	12.8766
GZMA	12.8509
COL14A1	12.7994
ASPN	12.7736
CYR61	12.7479
MYOM2	12.6964
CD14	12.6449
IL2RB	12.6449
RRM2	12.5934
NRP2	12.5418
NRP1	12.5161
PDS5B	12.4903
TAGLN	12.4646
CNN1	12.4646
LTBP1	12.3873
PDGFD	12.3873
HIST1H1B	12.3101
B3GAT2	12.1555
IGFBP2	12.0783
MCAM	12.0525
DLGAP5	12.0525
CHST7	11.8723
CSGALNACT1	11.8723
CSGALNACT2	11.8723
CDKN1C	11.8208
CUL9	11.7693
P4HA2	11.7177
P4HA3	11.7177
MFAP5	11.5375
ASPM	11.4087
CDKN3	11.4087
NUSAP1	11.4087
NDC80	11.4087
MFAP2	11.3057
CCNA2	11.2799
MMP15	11.2284
DPT	11.1769
ACTA2	11.1512
NRARP	10.9967
CENPF	10.9709
MKI67	10.9709
RND1	10.9709
SIK1	10.9451
COL7A1	10.9194
LIN9	10.8679
CTSK	10.8164
CD19	10.8164
PDGFA	10.7649
HSPB6	10.7391
THY1	10.5846
S1PR3	10.5073
GADD45G	10.4558
S1PR1	10.4301
ARHGEF11	10.4301
ITPR1	10.4301
PKN3	10.4301
CD40LG	10.1725
FCGR2A	10.1468
TNFAIP6	10.1468
ACE	10.1468
GPC6	9.91501
GZMH	9.91501
CRTC2	9.86351
TBC1D4	9.86351
SERPINA1	9.812
TOPORS	9.68323
NINL	9.68323
ZEB1	9.63173
PCOLCE	9.4257
STXBP2	9.4257
KLHL13	9.34844
COL5A3	9.34844
TYMS	9.32269
PPP2R5B	9.21968
BAMBI	9.19392
RUNX1T1	9.01365
FCGR3A	8.9879
ADRB2	8.88488
NEDD4	8.80762
PTX3	8.75612
CDC20	8.6531
NOS3	8.6016
FGF7	8.52434
CENPM	8.49858
ANTXR1	8.39557
SMTN	8.39557
CCR8	8.13804
AOC3	8.13804
MRC1	8.11228
INSR	8.00927
TMOD1	7.98352
CSPG4	7.8805
WNT6	7.80324
PLOD2	7.77749
BATF2	7.77749
PCOLCE2	7.67448
HPGDS	7.59722
ACKR1	7.49421
CEBPD	7.49421
F10	7.46845
FGFBP1	7.4427
NMB	7.4427
FCGR1A	7.39119
NME5	7.36544
FPR1	7.36544
CBX7	7.28818
PDCD1	7.26243
AK1	7.23667
GPC3	7.18517
TLE2	7.18517
CENPW	7.13366
RORA	7.13366
CXCL11	7.0564
SPC25	7.03065
EPHA4	7.03065
UPRT	7.03065
BATF	7.00489
FERMT2	6.95339
FZD4	6.90188
CXCL9	6.87613
SOX17	6.87613
COL27A1	6.87613
IRS2	6.87613
NEXN	6.82462
AQP1	6.82462
CA2	6.82462
KIFC3	6.82462
CDH13	6.82462
TFF3	6.82462
TFF1	6.82462
INTU	6.79887
DAAM2	6.79887
CTHRC1	6.79887
HDAC5	6.64435
HAND2	6.48983
SOX18	6.48983
CCR4	6.38681
RIT1	6.36106
MATK	6.36106
TCF7	6.25805
COL12A1	6.25805
FCGR3B	6.20654
PHC1	6.20654
PTPN22	6.18079
CTSO	6.18079
HLA-DOB	6.18079
CTSF	6.18079
CFH	6.15503
AKT3	6.10353
CISH	6.05202
MSX1	5.97476
F2RL2	5.97476
DDR2	5.8975
ZFP1	5.8975
TNFRSF18	5.846
FCER2	5.79449
C3	5.76874
NKG7	5.61422
SOCS2	5.5112
EREG	5.48545
PTPN3	5.48545
LGMN	5.48545
STAG3	5.38244
PTGDR	5.38244
NT5E	5.35668
KLHL42	5.33093
LZTR1	5.33093
KCTD17	5.33093
BAG3	5.30518
FER	5.25367
ANPEP	5.25367
TNFRSF4	5.22792
ADAMTS12	5.20216
AK9	5.20216
CTPS2	5.1249
TUBB6	5.1249
GGT5	5.1249
RSAD2	5.02189
IFIT3	5.02189
IFIT1	5.02189
KCNJ8	5.02189
OASL	5.02189
CST3	5.02189
MYBL1	4.97038
APOC2	4.97038
APOE	4.94463
PRELP	4.7386
OGN	4.7386
AKAP12	4.66134
CD79A	4.63559
ALPL	4.58408
EED	4.40381
HLA-DRB1	4.37806
HSPB8	4.37806
TGFBR3	4.32655
TM4SF1	4.27505
CDO1	4.27505
VEGFB	4.22354
CFP	4.17203
S100B	4.17203
SGK1	4.09477
NES	4.04327
PDE5A	4.04327
MRVI1	4.04327
CMPK2	4.01751
SACM1L	4.01751
PREX2	4.01751
PTPRM	4.01751
AKR1C3	3.99176
MAGI1	3.94025
CYP1B1	3.9145
TBX2	3.9145
SH2D3C	3.88875
ZNF384	3.88875
CDA	3.83724
NUDT12	3.83724
HIST1H1A	3.75998
SMAD9	3.75998
CILP	3.75998
LILRA5	3.75998
UBE2E2	3.73423
UBE2W	3.73423
UBE2M	3.73423
ADAMTS9	3.68272
ADAMTS6	3.68272
THSD7A	3.68272
SBSPON	3.68272
SPON1	3.68272
THSD1	3.68272
ADAMTS1	3.68272
SEMA5A	3.65697
PDE3B	3.65697
FGF1	3.5282
ID1	3.47669
HES4	3.45094
EN1	3.45094
EBF1	3.45094
HIST1H3C	3.45094
CBX6	3.42519
STX2	3.39943
CD79B	3.32217
SEC23A	3.27067
PLTP	3.27067
C2	3.21916
NNMT	3.21916
RSPO3	3.16765
CTSL	3.16765
HSPB2	3.16765
PITPNM2	3.1419
TNFRSF9	3.06464
AMOTL1	3.03889
BATF3	3.01313
MPDZ	2.98738
LAG3	2.96163
PYCR2	2.93587
COL10A1	2.93587
ANGPT2	2.91012
RGS13	2.85861
KCNMB1	2.85861
H3F3C	2.78135
ADAM12	2.7556
PGF	2.7556
PLEKHG5	2.72985
VEGFC	2.65259
IGFBP7	2.54958
IL1R2	2.39506
STARD8	2.39506
DLC1	2.39506
ID3	2.3693
FBLIM1	2.26629
PROS1	2.26629
AREG	2.26629
C1S	2.21478
CDKN2A	2.18903
HLA-DQA1	2.16328
HLA-DQA2	2.16328
HLA-DQB2	2.16328
CD8B	2.11177
MPZ	2.06026
ID4	2.06026
EGR3	2.06026
IGHV3-11	2.00876
MT2A	2.00876
MT1E	2.00876
MT1G	2.00876
MT1X	2.00876
CXCR6	1.9315
PLA2G7	1.9315
GPX7	1.87999
HIST1H4E	1.87999
KALRN	1.85424
PYDC1	1.85424
TRIP10	1.85424
CD209	1.85424
AXL	1.82848
CALML5	1.80273
PLEKHH2	1.77698
CHAC1	1.75122
CPLX1	1.69972
SYTL4	1.69972
NRXN2	1.69972
CHN1	1.67396
DCTN6	1.67396
KLF9	1.67396
KRT5	1.67396
CHI3L1	1.5452
BANK1	1.5452
CD36	1.5452
PCSK5	1.5452
IGFBP6	1.5452
IGFBP4	1.5452
RAB4B	1.5452
SYNPO	1.51944
LOXL2	1.51944
SLIT2	1.49369
SLIT3	1.49369
CREB3L1	1.49369
PIGB	1.49369
PIGL	1.49369
SCARB1	1.46794
OLR1	1.44218
PLA2G2A	1.41643
FCGR2B	1.41643
RALB	1.41643
AIF1	1.41643
F5	1.39068
HIST1H1E	1.36492
SLC12A2	1.33917
PDE7B	1.33917
PDE2A	1.33917
FCGBP	1.33917
H6PD	1.31342
F13A1	1.31342
TREM2	1.31342
CLU	1.31342
CHMP4A	1.31342
DMPK	1.31342
ARL2	1.28766
VASH1	1.28766
LOXL1	1.26191
SOD3	1.23616
SOD2	1.23616
DCX	1.23616
GPS2	1.2104
CCL8	1.2104
PDE1A	1.18465
PDE4C	1.18465
S100A7	1.1589
FABP5	1.1589
DNMT3B	1.13314
PLCE1	1.08164
ABCC9	1.08164
APOC1	1.08164
S100A1	1.03013
S100P	1.03013
SFRP2	1.03013
SFRP4	1.03013
C1QC	0.978625
MAP2	0.952871
TMED7	0.952871
DAB2	0.901365
HIST1H1C	0.875612
HIST1H1D	0.875612
PLIN2	0.875612
RNASE1	0.875612
PROCR	0.875612
TFAP2B	0.849858
NKX3-1	0.849858
HBB	0.849858
HSPA2	0.849858
TCL1A	0.849858
SEMA6B	0.849858
CXCL13	0.824105
ICAM4	0.824105
FLNC	0.798352
PHLDB2	0.772599
HNRNPH1	0.772599
HNRNPH2	0.772599
RBPMS	0.772599
TBX3	0.772599
RBFOX2	0.772599
SGCB	0.746845
SGCE	0.746845
SNTA1	0.746845
KLK1	0.746845
SMAD6	0.721092
SGCD	0.695339
EGR4	0.669585
RND3	0.669585
HIST1H2AL	0.669585
ARC	0.669585
RRAD	0.669585
MAFF	0.669585
HIST2H2BF	0.643832
MOCS1	0.643832
CES1	0.618079
PRSS23	0.592326
IGLV1-40	0.592326
TNFSF4	0.566572
CALCRL	0.566572
RAMP1	0.566572
PALLD	0.566572
MZB1	0.566572
RAMP3	0.566572
PTGDS	0.566572
EPS8	0.566572
RAMP2	0.566572
PTGIS	0.566572
COPZ2	0.540819
IGLV3-25	0.540819
CD93	0.515066
COPS8	0.489312
GZMK	0.489312
COMMD10	0.489312
COMMD3	0.489312
PODXL	0.463559
ARHGAP6	0.437806
COX4I2	0.437806
DERL3	0.437806
DISC1	0.412053
TFPI2	0.412053
TRIM66	0.412053
CSRP2	0.412053
ING1	0.412053
FBLN5	0.412053
SUCLA2	0.386299
NID2	0.386299
JCHAIN	0.360546
MSR1	0.360546
NDUFA7	0.360546
MYO1B	0.334793
MAP1B	0.334793
SDHAF2	0.334793
KRT6B	0.334793
S100A2	0.309039
S100A14	0.309039
TMEM176B	0.309039
CD81	0.309039
CLEC4E	0.309039
IGHV3-21	0.309039
IGLV3-1	0.309039
TFPI	0.283286
UGDH	0.283286
PAM	0.283286
HMGB3	0.283286
NDUFC2	0.283286
NDUFB8	0.283286
NDUFA9	0.283286
IGHV3-30	0.283286
NDUFAF1	0.283286
TWSG1	0.283286
GDF15	0.283286
NDUFA13	0.283286
GJA4	0.257533
NOSTRIN	0.257533
GATA2	0.257533
SEPT8	0.257533
HILPDA	0.257533
GEM	0.257533
CLIC3	0.257533
CCDC82	0.257533
ACACB	0.257533
IGHA1	0.257533
MAP1A	0.257533
C15orf48	0.257533
SEPT4	0.257533
RPF1	0.23178
SNX7	0.23178
INSIG2	0.23178
ARL6	0.23178
NMD3	0.23178
RIOK2	0.23178
RPP21	0.23178
TRMT11	0.23178
RTKN2	0.23178
DDX47	0.23178
LLPH	0.23178
ARL6IP1	0.23178
AMFR	0.23178
PPAN	0.23178
IGLV1-47	0.23178
ERRFI1	0.206026
CRABP2	0.206026
SLC40A1	0.206026
RARB	0.206026
HEPH	0.206026
SNAPC3	0.206026
CTSW	0.206026
PRCP	0.206026
KLRG1	0.206026
NDUFA4L2	0.206026
MSRB3	0.206026
SNAPC1	0.206026
IGHG1	0.206026
IGHV4-34	0.206026
COX7A1	0.206026
IGLV3-19	0.206026
HMOX1	0.206026
LINC01116	0.180273
LXN	0.180273
FKBP9	0.180273
DPYSL2	0.180273
CBWD1	0.180273
OLFM1	0.180273
FEZ1	0.180273
TCTN3	0.180273
CLN5	0.180273
CFL2	0.180273
BCL2A1	0.180273
CPT1C	0.180273
IGLV2-23	0.180273
HMGCL	0.15452
TMEM45A	0.15452
B3GALNT1	0.15452
EGFLAM	0.15452
GLA	0.15452
CERCAM	0.15452
SDHD	0.15452
PPFIBP1	0.15452
IGHG4	0.15452
IGHV1-46	0.15452
SERPINF1	0.15452
ALKBH5	0.15452
IGLV1-44	0.15452
IGLV2-11	0.15452
A4GALT	0.15452
FCMR	0.128766
IGKV1-8	0.128766
TTC30A	0.128766
NSUN3	0.128766
DTHD1	0.128766
HPGD	0.128766
LYSMD3	0.128766
TMEM242	0.128766
PEG10	0.128766
AQP3	0.128766
C11orf96	0.128766
BEST1	0.128766
ANO1	0.128766
MSRB2	0.128766
ANKRD30A	0.128766
CERS5	0.128766
R3HDM2	0.128766
HCFC2	0.128766
CHURC1	0.128766
IGHV1-18	0.128766
IGHV5-51	0.128766
IGHV3-53	0.128766
IGHV3-66	0.128766
DTWD1	0.128766
MESP1	0.128766
SNHG9	0.128766
ITPRIPL2	0.128766
C1QTNF1	0.128766
IGLV6-57	0.128766
IGLV2-8	0.128766
IFT27	0.128766
TINAGL1	0.103013
STRIP1	0.103013
OLFML2B	0.103013
RALGPS2	0.103013
PXDN	0.103013
FAM228B	0.103013
EMILIN1	0.103013
IGKV3D-11	0.103013
SHOX2	0.103013
SPTSSB	0.103013
MED7	0.103013
ADAM19	0.103013
RAB23	0.103013
FOXK1	0.103013
STEAP1	0.103013
ACHE	0.103013
CCDC71L	0.103013
STRIP2	0.103013
CPQ	0.103013
TNC	0.103013
MS4A7	0.103013
FADS3	0.103013
ALG8	0.103013
SYTL2	0.103013
LINC00987	0.103013
HOXC9	0.103013
LINC01481	0.103013
C12orf29	0.103013
FBXL3	0.103013
MED6	0.103013
IGHV1-3	0.103013
IGHV3-23	0.103013
NPW	0.103013
NSRP1	0.103013
P3H4	0.103013
HOXB2	0.103013
WISP2	0.103013
TSHZ2	0.103013
JSRP1	0.103013
MED26	0.103013
RCN3	0.103013
IGLV3-9	0.103013
IGLC3	0.103013
C1QTNF6	0.103013
SLC2A5	0.0772599
RBP7	0.0772599
ZNF684	0.0772599
CITED4	0.0772599
SGIP1	0.0772599
C1orf54	0.0772599
PRRX1	0.0772599
IGKV1-12	0.0772599
IGKV1-16	0.0772599
IGKV1D-39	0.0772599
GPAT2	0.0772599
LYPD1	0.0772599
SPEG	0.0772599
KCNE4	0.0772599
EOMES	0.0772599
ABI3BP	0.0772599
HEG1	0.0772599
ABTB1	0.0772599
TCTEX1D2	0.0772599
PARM1	0.0772599
ANKH	0.0772599
PLPP1	0.0772599
PPWD1	0.0772599
NREP	0.0772599
ZCCHC10	0.0772599
CD109	0.0772599
SMIM8	0.0772599
BACH2	0.0772599
RNF217	0.0772599
STXBP5	0.0772599
CCZ1	0.0772599
CYTH3	0.0772599
TRGC2	0.0772599
PDK4	0.0772599
BRI3	0.0772599
LRRC17	0.0772599
KLHL15	0.0772599
GK	0.0772599
SRPX	0.0772599
P2RY10	0.0772599
MAP7D3	0.0772599
ZNF703	0.0772599
FAM110B	0.0772599
LURAP1L	0.0772599
C9orf3	0.0772599
TNFSF15	0.0772599
RABGAP1	0.0772599
PRRX2	0.0772599
ST5	0.0772599
DENND5A	0.0772599
PGM2L1	0.0772599
ZNF503	0.0772599
WDR11	0.0772599
GRASP	0.0772599
TMBIM4	0.0772599
CPM	0.0772599
ZNF26	0.0772599
NOVA1	0.0772599
GSKIP	0.0772599
IGHG3	0.0772599
IGHV1-2	0.0772599
IGHV4-4	0.0772599
IGHV4-31	0.0772599
IGHV3-43	0.0772599
IGSF6	0.0772599
ZNF267	0.0772599
MT1F	0.0772599
MPRIP	0.0772599
SNHG25	0.0772599
LDLRAD4	0.0772599
CCDC102B	0.0772599
RIN2	0.0772599
ZBP1	0.0772599
FAAP24	0.0772599
EHD2	0.0772599
IGLV1-51	0.0772599
IGLV3-27	0.0772599
IGLC2	0.0772599
MIAT	0.0772599
FAM109B	0.0772599
ZBTB40	0.0515066
P3H1	0.0515066
SRGAP2C	0.0515066
S100A3	0.0515066
ATP8B2	0.0515066
ABL2	0.0515066
IER5	0.0515066
PIGR	0.0515066
SERTAD4-AS1	0.0515066
EDARADD	0.0515066
TTC32	0.0515066
FNDC4	0.0515066
CNRIP1	0.0515066
IGKV3D-15	0.0515066
GULP1	0.0515066
ANKRD28	0.0515066
ENTPD3-AS1	0.0515066
ABHD14A	0.0515066
MXD4	0.0515066
NSG1	0.0515066
CCNG2	0.0515066
TIFA	0.0515066
PGRMC2	0.0515066
ERAP2	0.0515066
DNAJC18	0.0515066
DPYSL3	0.0515066
CREBRF	0.0515066
ZNF354A	0.0515066
BTNL9	0.0515066
CLIC5	0.0515066
CNKSR3	0.0515066
HOXA3	0.0515066
MEST	0.0515066
TRBV20-1	0.0515066
XG	0.0515066
GPM6B	0.0515066
CLIC2	0.0515066
STC1	0.0515066
ADAMDEC1	0.0515066
MSC	0.0515066
PI15	0.0515066
LINC00861	0.0515066
FBXO3	0.0515066
PRR5L	0.0515066
FAM89B	0.0515066
RBM7	0.0515066
CCDC3	0.0515066
AFAP1L2	0.0515066
CLECL1	0.0515066
NELL2	0.0515066
AMIGO2	0.0515066
TNS2	0.0515066
ZNF268	0.0515066
GJB2	0.0515066
SPRYD7	0.0515066
TRAV29DV5	0.0515066
IGHV3-7	0.0515066
IGHV3-48	0.0515066
IGHV3-49	0.0515066
IGHV3-73	0.0515066
IGHV3-74	0.0515066
GOLGA8A	0.0515066
MTHFS	0.0515066
METRN	0.0515066
VASN	0.0515066
EXOC3L1	0.0515066
CRISPLD2	0.0515066
ARL4D	0.0515066
MMD	0.0515066
METRNL	0.0515066
RNF165	0.0515066
LAMP5	0.0515066
PKIG	0.0515066
WFDC2	0.0515066
SULF2	0.0515066
KANK2	0.0515066
ARRDC2	0.0515066
CXCL17	0.0515066
INAFM1	0.0515066
ZNF701	0.0515066
ZNF787	0.0515066
IGLV4-69	0.0515066
IGLV5-45	0.0515066
IGLV1-41	0.0515066
IGLV1-36	0.0515066
APOBEC3F	0.0515066
MAP3K7CL	0.0515066
IGHV3-64	0.0515066
IGHV1-69	0.0515066
SAMD11	0.0257533
ACAP3	0.0257533
MMP23B	0.0257533
UTS2	0.0257533
IFFO2	0.0257533
NBL1	0.0257533
MAP3K6	0.0257533
EVA1B	0.0257533
PTCH2	0.0257533
PLPP3	0.0257533
TSPAN2	0.0257533
NPL	0.0257533
HMCN1	0.0257533
SOX13	0.0257533
KIF26B	0.0257533
FKBP1B	0.0257533
CGREF1	0.0257533
FBXO48	0.0257533
MRPL53	0.0257533
AC133644.2	0.0257533
IGKV1-17	0.0257533
IGKV2-24	0.0257533
IGKV2-29	0.0257533
IGKV1-39	0.0257533
MALL	0.0257533
C2orf76	0.0257533
LIMS2	0.0257533
CCDC74A	0.0257533
HOXD9	0.0257533
FKBP7	0.0257533
KLF7	0.0257533
BHLHE40-AS1	0.0257533
ZNF385D	0.0257533
CLEC3B	0.0257533
STAB1	0.0257533
GCSAM	0.0257533
PLA1A	0.0257533
RAB6B	0.0257533
PLSCR4	0.0257533
SUCNR1	0.0257533
MECOM	0.0257533
JAKMIP1	0.0257533
STAP1	0.0257533
RASGEF1B	0.0257533
PLAC8	0.0257533
ARHGAP24	0.0257533
C4orf46	0.0257533
SCRG1	0.0257533
MIR4458HG	0.0257533
RAI14	0.0257533
FBXO4	0.0257533
IPO11	0.0257533
F2RL1	0.0257533
EPB41L4A	0.0257533
PRR16	0.0257533
CDKL3	0.0257533
ADTRP	0.0257533
PHACTR1	0.0257533
ZBTB22	0.0257533
CPNE5	0.0257533
RRAGD	0.0257533
FAM162B	0.0257533
MAN1A1	0.0257533
NHSL1	0.0257533
PLAGL1	0.0257533
SMOC2	0.0257533
LINC01615	0.0257533
HOXA10	0.0257533
TRGV9	0.0257533
SUGCT	0.0257533
PHKG1	0.0257533
GTF2IRD2	0.0257533
MTERF1	0.0257533
CLDN15	0.0257533
FBXL13	0.0257533
TRBV2	0.0257533
TRBC1	0.0257533
PRRG1	0.0257533
FAAH2	0.0257533
CHIC1	0.0257533
TDRP	0.0257533
DEFB1	0.0257533
ATP6V1B2	0.0257533
C8orf58	0.0257533
TOX	0.0257533
GLIS3	0.0257533
LINC01235	0.0257533
BNC2	0.0257533
CNTNAP3B	0.0257533
CBWD5	0.0257533
ABHD17B	0.0257533
GAS1	0.0257533
ECM2	0.0257533
SLC35D2	0.0257533
ZNF189	0.0257533
TMEM38B	0.0257533
MIR181A2HG	0.0257533
ANGPTL2	0.0257533
TMEM80	0.0257533
FAM160A2	0.0257533
FIBIN	0.0257533
FJX1	0.0257533
GLYATL2	0.0257533
FOLR2	0.0257533
SLCO2B1	0.0257533
LRRC32	0.0257533
ANKRD49	0.0257533
C11orf70	0.0257533
CWF19L2	0.0257533
LAYN	0.0257533
FAM171A1	0.0257533
OTUD1	0.0257533
AGAP9	0.0257533
PALD1	0.0257533
ANKRD22	0.0257533
MORN4	0.0257533
ADAM8	0.0257533
STK38L	0.0257533
FGD4	0.0257533
CPNE8	0.0257533
ZNF641	0.0257533
ELK3	0.0257533
SDS	0.0257533
MEDAG	0.0257533
FRY	0.0257533
KDELC1	0.0257533
TRAV12-1	0.0257533
TRAV16	0.0257533
TRAV17	0.0257533
TRDV1	0.0257533
HEATR5A	0.0257533
L3HYPDH	0.0257533
DIO2	0.0257533
IGHG2	0.0257533
IGHM	0.0257533
IGHV1-24	0.0257533
IGHV3-33	0.0257533
IGHV4-61	0.0257533
GPR176	0.0257533
MAPKBP1	0.0257533
LRRC49	0.0257533
ST20	0.0257533
TMEM204	0.0257533
GPRC5B	0.0257533
APOBR	0.0257533
DOK4	0.0257533
SLC12A4	0.0257533
DNAAF1	0.0257533
TAF1C	0.0257533
FAM157C	0.0257533
NXN	0.0257533
SPNS2	0.0257533
VMO1	0.0257533
TMEM88	0.0257533
FLCN	0.0257533
SMCR5	0.0257533
ULK2	0.0257533
NEK8	0.0257533
EVI2B	0.0257533
MMP28	0.0257533
CCL4L2	0.0257533
TNS4	0.0257533
TBKBP1	0.0257533
ABCA8	0.0257533
CASKIN2	0.0257533
BAHCC1	0.0257533
POLI	0.0257533
PCED1A	0.0257533
PPP1R16B	0.0257533
ZBTB46	0.0257533
TNFSF14	0.0257533
CCDC151	0.0257533
PLEKHF1	0.0257533
ZNF507	0.0257533
NFKBID	0.0257533
ZNF345	0.0257533
ZNF383	0.0257533
LINC01480	0.0257533
CNFN	0.0257533
ZNF28	0.0257533
ZNF525	0.0257533
ZNF550	0.0257533
MZF1-AS1	0.0257533
IGLV3-10	0.0257533
RNU12	0.0257533
RABL2B	0.0257533
RCAN1	0.0257533
IGKV1D-16	0.0257533
ANKRD65	0
GABRD	0
SLC45A1	0
ARHGEF10L	0
IGSF21	0
PAQR7	0
ZNF683	0
SPOCD1	0
FAM167B	0
ZMYM6	0
SLC6A9	0
C1orf228	0
RAVER2	0
FPGT	0
ADGRL4	0
LRRC8C	0
FAM69A	0
TMIGD3	0
MTMR11	0
CIART	0
SHE	0
PMF1	0
PEAR1	0
FCRL5	0
FCRL3	0
FMO4	0
DNM3OS	0
ANGPTL1	0
GPR25	0
PHLDA3	0
ZBED6	0
SLC41A1	0
IL20	0
TRIB2	0
OSR1	0
RBKS	0
EHD3	0
QPCT	0
BCYRN1	0
IGKV1-6	0
IGKV3-7	0
IGKV1-27	0
IGKV2-30	0
IGKV3D-20	0
IGKV1D-13	0
IGKV1D-8	0
MAL	0
ZNF2	0
SEMA4C	0
RABL2A	0
RBM45	0
HECW2	0
RFTN2	0
SLC11A1	0
FGD5	0
ZNF620	0
ARF4-AS1	0
DNASE1L3	0
FAM107A	0
FAM3D	0
PTPRG	0
LINC00877	0
CLDND1	0
SLCO2A1	0
RARRES1	0
CLDN11	0
C3orf70	0
TMEM44	0
LDB2	0
ADGRA3	0
ZCCHC4	0
TBC1D19	0
NIPAL1	0
NMU	0
EMCN	0
ENPEP	0
TNIP3	0
MIR3945HG	0
C5orf38	0
ARL15	0
GAPT	0
RNF180	0
SMN1	0
ZBED3	0
LUCAT1	0
NR2F1-AS1	0
MCTP1	0
FBXL17	0
PCDHGA10	0
ARAP3	0
PCDH1	0
JAKMIP2	0
CARMN	0
EEF1E1	0
CAP2	0
UBD	0
VARS2	0
TNXB	0
PPT2	0
TAP2	0
ELOVL4	0
TPBG	0
ANKRD6	0
MANEA-AS1	0
TSTD3	0
TRAF3IP2-AS1	0
PLEKHG1	0
MYCT1	0
CCR6	0
AC147651.4	0
GPR146	0
ZFAND2A	0
RADIL	0
RBAK-RBAKDN	0
CCZ1B	0
MEOX2	0
AGR2	0
AGR3	0
EPDR1	0
TRGC1	0
TRG-AS1	0
TRGV5	0
TRGV3	0
ABCB1	0
RASA4	0
POLR2J2	0
KMT2E-AS1	0
LRRN3	0
ING3	0
BPGM	0
CLEC5A	0
ZNF783	0
GIMAP1	0
WDR86	0
LINC00685	0
MXRA5	0
EGFL6	0
TSPAN7	0
LINC01281	0
CXorf36	0
ZNF182	0
PRAF2	0
TSIX	0
ARMCX4	0
CAPN6	0
PLS3	0
SMARCA1	0
SMIM10	0
ZNF449	0
FHL1	0
HAUS7	0
F8A1	0
ZDHHC2	0
MTUS1	0
ADAM28	0
UBXN8	0
RNF122	0
AP3M2	0
MATN2	0
OSR2	0
BAALC	0
AARD	0
SLC45A4	0
HRCT1	0
FAM27C	0
CBWD3	0
MAMDC2	0
NFIL3	0
ZNF169	0
NIPSNAP3B	0
SVEP1	0
ZBTB26	0
OLFML2A	0
IER5L	0
ABCA2	0
LINC01001	0
MRPL23	0
KCNQ1OT1	0
SAA2	0
ACY3	0
KBTBD3	0
PHLDB1	0
TBCEL	0
NTM	0
PRTFDC1	0
AGAP4	0
BICC1	0
HHEX	0
DNMBP	0
DUSP5	0
HTRA1	0
KLRC3	0
EMP1	0
LRMP	0
TMTC1	0
KRT86	0
KRT81	0
ARHGEF25	0
RASSF3	0
BBS10	0
NTN4	0
TESC	0
PABPC3	0
PAN3	0
TPT1-AS1	0
SETDB2	0
PCDH17	0
PCDH9	0
TMEM255B	0
GAS6	0
AL589743.1	0
RNASE4	0
TRAV2	0
TRAV8-2	0
TRAV8-4	0
TRAV9-2	0
TRAV8-6	0
TRAV21	0
NFATC4	0
BRMS1L	0
MBIP	0
RHOJ	0
FLRT2	0
PLD4	0
IGHA2	0
IGHV3-20	0
FAN1	0
MEIS2	0
C2CD4B	0
RHCG	0
FAM234A	0
CORO7	0
RMI2	0
NOMO1	0
OTOA	0
SDR42E2	0
GDPD3	0
C16orf86	0
DDX19A	0
ZCCHC14	0
CBFA2T3	0
SCARF1	0
HIC1	0
CLEC10A	0
NLGN2	0
SENP3	0
CCDC144A	0
LRRC37B	0
TMEM98	0
CCL13	0
CCL23	0
ARHGAP23	0
STAC2	0
FBXL20	0
PLEKHH3	0
MEOX1	0
TBX2-AS1	0
NACA2	0
TANC2	0
ABCA10	0
CD300E	0
DLGAP1-AS2	0
ARHGAP28	0
RAB12	0
ANKRD29	0
ZNF521	0
ZNF532	0
ZNF516	0
PARD6G-AS1	0
PARD6G	0
ADAM33	0
NPEPL1	0
PPP1R3D	0
MADCAM1	0
PALM	0
EBI3	0
MCEMP1	0
FAM129C	0
BORCS8	0
FXYD7	0
TMEM147-AS1	0
ZFP30	0
CAPN12	0
PCAT19	0
PINLYP	0
ADM5	0
SIGLEC14	0
LAIR2	0
KIR2DL4	0
ZNF543	0
DGCR6	0
IGLV8-61	0
MIF-AS1	0
SUSD2	0
TTC28	0
CARD10	0
PRR34-AS1	0
CHKB	0
IL10RB-AS1	0
CRYZL1	0
LINC01436	0
ERG	0
SLAMF9	0
PSORS1C2	0
SERPINB4	0
SERPINB3	0
FAM41C	-0.0257533
CAMK2N1	-0.0257533
FABP3	-0.0257533
PTBP2	-0.0257533
C1orf56	-0.0257533
MNDA	-0.0257533
FCRL6	-0.0257533
TNN	-0.0257533
NUAK2	-0.0257533
G0S2	-0.0257533
KCNS3	-0.0257533
STON1	-0.0257533
LINC00309	-0.0257533
C2orf40	-0.0257533
AC017002.2	-0.0257533
HOXD8	-0.0257533
FAM171B	-0.0257533
IKZF2	-0.0257533
CYP27A1	-0.0257533
ECEL1	-0.0257533
LMCD1	-0.0257533
ZNF445	-0.0257533
TMEM158	-0.0257533
ZBED2	-0.0257533
TMEM108	-0.0257533
TM4SF18	-0.0257533
GPR171	-0.0257533
P2RY14	-0.0257533
MB21D2	-0.0257533
FAM43A	-0.0257533
ZFYVE28	-0.0257533
EVC2	-0.0257533
TXK	-0.0257533
PCDH18	-0.0257533
DCLK2	-0.0257533
CPE	-0.0257533
CETN3	-0.0257533
SRP19	-0.0257533
C5orf46	-0.0257533
AFAP1L1	-0.0257533
STC2	-0.0257533
FOXC1	-0.0257533
BLOC1S5	-0.0257533
ZNF165	-0.0257533
THEMIS	-0.0257533
RAPGEF5	-0.0257533
CPVL	-0.0257533
TRGV10	-0.0257533
AASS	-0.0257533
TRBV5-1	-0.0257533
TRBV6-5	-0.0257533
TRBV19	-0.0257533
TRBV27	-0.0257533
CXorf21	-0.0257533
MED14OS	-0.0257533
SHROOM4	-0.0257533
TCEAL7	-0.0257533
TCEAL1	-0.0257533
TNFRSF10C	-0.0257533
TNFRSF10D	-0.0257533
ADGRA2	-0.0257533
RDH10	-0.0257533
ZBTB10	-0.0257533
LYNX1	-0.0257533
IL11RA	-0.0257533
RUSC2	-0.0257533
ALDH1A1	-0.0257533
FBP1	-0.0257533
TNFSF8	-0.0257533
SLC39A13	-0.0257533
C1QTNF4	-0.0257533
APLNR	-0.0257533
MS4A4A	-0.0257533
C11orf95	-0.0257533
PELI3	-0.0257533
ARHGEF17	-0.0257533
OAF	-0.0257533
CRTAM	-0.0257533
VWA5A	-0.0257533
NRGN	-0.0257533
ZEB1-AS1	-0.0257533
VSTM4	-0.0257533
FAM13C	-0.0257533
CH25H	-0.0257533
CPXM2	-0.0257533
RBP5	-0.0257533
APOLD1	-0.0257533
PFKM	-0.0257533
ZNF740	-0.0257533
HOXC6	-0.0257533
TSPAN8	-0.0257533
NR2C1	-0.0257533
GLT8D2	-0.0257533
NUAK1	-0.0257533
HVCN1	-0.0257533
VPS33A	-0.0257533
HCAR2	-0.0257533
HCAR3	-0.0257533
SLC15A4	-0.0257533
INTS6	-0.0257533
GPR18	-0.0257533
ITGBL1	-0.0257533
TRDC	-0.0257533
COCH	-0.0257533
EML1	-0.0257533
IGHD	-0.0257533
ATP10A	-0.0257533
STARD9	-0.0257533
LINC00926	-0.0257533
AQP9	-0.0257533
SNX33	-0.0257533
GOLGA6L9	-0.0257533
HAPLN3	-0.0257533
NR2F2-AS1	-0.0257533
LINC01569	-0.0257533
NPIPA1	-0.0257533
PLLP	-0.0257533
CPNE7	-0.0257533
P2RX5	-0.0257533
P2RX1	-0.0257533
CPD	-0.0257533
HOXB-AS1	-0.0257533
HOXB3	-0.0257533
ABCA6	-0.0257533
CYGB	-0.0257533
APCDD1	-0.0257533
REM1	-0.0257533
FOXS1	-0.0257533
SLPI	-0.0257533
PCMTD2	-0.0257533
CAPS	-0.0257533
ZNF358	-0.0257533
KANK3	-0.0257533
SYDE1	-0.0257533
WTIP	-0.0257533
LGI4	-0.0257533
FFAR2	-0.0257533
ALKBH6	-0.0257533
RASIP1	-0.0257533
PLEKHA4	-0.0257533
ZNF649	-0.0257533
ZNF583	-0.0257533
IGLV7-46	-0.0257533
IGLV2-18	-0.0257533
LGALS2	-0.0257533
APOBEC3A	-0.0257533
MIR155HG	-0.0257533
VWA1	-0.0515066
SYNC	-0.0515066
DIRAS3	-0.0515066
ADGRL2	-0.0515066
PALMD	-0.0515066
PYHIN1	-0.0515066
LY9	-0.0515066
FMO1	-0.0515066
DYRK3	-0.0515066
CRIM1	-0.0515066
AC017002.1	-0.0515066
FILIP1L	-0.0515066
NAF1	-0.0515066
TTC33	-0.0515066
CCNJL	-0.0515066
HRH2	-0.0515066
PXDC1	-0.0515066
ADGRF5	-0.0515066
CRISP3	-0.0515066
SLC35A1	-0.0515066
SCML4	-0.0515066
SAMD3	-0.0515066
STEAP4	-0.0515066
LSMEM1	-0.0515066
TRBV9	-0.0515066
TRBV7-6	-0.0515066
TMEM47	-0.0515066
SULF1	-0.0515066
ENPP2	-0.0515066
EGFL7	-0.0515066
MIR210HG	-0.0515066
TIMM10B	-0.0515066
OLFML1	-0.0515066
MRGPRF	-0.0515066
CCDC84	-0.0515066
ITIH5	-0.0515066
PBLD	-0.0515066
MMRN2	-0.0515066
KLRF1	-0.0515066
GPRC5A	-0.0515066
KRT6A	-0.0515066
TMTC3	-0.0515066
RASL11A	-0.0515066
DGKH	-0.0515066
SERP2	-0.0515066
TRAV1-2	-0.0515066
TRAV12-2	-0.0515066
TRAV13-2	-0.0515066
TRAV14DV4	-0.0515066
TRAV12-3	-0.0515066
TRAC	-0.0515066
CLEC14A	-0.0515066
IGHV4-59	-0.0515066
SLCO3A1	-0.0515066
PRSS21	-0.0515066
MT1A	-0.0515066
FBXL8	-0.0515066
ZNF23	-0.0515066
ZFHX3	-0.0515066
CAMTA2	-0.0515066
MIR497HG	-0.0515066
LRRC75A	-0.0515066
MTRNR2L1	-0.0515066
KRT23	-0.0515066
GJC1	-0.0515066
MXRA7	-0.0515066
CPXM1	-0.0515066
TMIGD2	-0.0515066
ZSWIM4	-0.0515066
PLVAP	-0.0515066
IFI30	-0.0515066
ZNF626	-0.0515066
SCGB1B2P	-0.0515066
PTGIR	-0.0515066
CDC42EP5	-0.0515066
CYYR1	-0.0515066
SLC5A3	-0.0515066
PODN	-0.0772599
FMO2	-0.0772599
NFASC	-0.0772599
FAP	-0.0772599
DLX2	-0.0772599
RBMS3	-0.0772599
CNGA1	-0.0772599
NPNT	-0.0772599
RNF39	-0.0772599
MAGEH1	-0.0772599
PDGFRL	-0.0772599
FBXO32	-0.0772599
RTN4RL2	-0.0772599
PTHLH	-0.0772599
PDE1B	-0.0772599
TMEM119	-0.0772599
DCLK1	-0.0772599
TRAV3	-0.0772599
TRAV4	-0.0772599
TRAV13-1	-0.0772599
PTGER2	-0.0772599
IGHV3-15	-0.0772599
IGHV2-26	-0.0772599
NDN	-0.0772599
RASL12	-0.0772599
DOCK6	-0.0772599
FXYD3	-0.0772599
IGLV3-21	-0.0772599
OLFML3	-0.103013
AFF3	-0.103013
ACVR2A	-0.103013
SCGB3A1	-0.103013
RCAN2	-0.103013
TRBV4-2	-0.103013
PCSK1N	-0.103013
TNFRSF11B	-0.103013
LY6D	-0.103013
MTRNR2L8	-0.103013
SNCG	-0.103013
NSMCE4A	-0.103013
TRAV19	-0.103013
TRAV38-2DV8	-0.103013
AHNAK2	-0.103013
CRIP1	-0.103013
ISLR	-0.103013
ZG16B	-0.103013
TPPP3	-0.103013
RNF152	-0.103013
GPR4	-0.103013
C5AR1	-0.103013
CLEC11A	-0.103013
KLK6	-0.103013
CYP4Z1	-0.128766
FBLN7	-0.128766
PASK	-0.128766
RASGRP2	-0.128766
AP000769.1	-0.128766
FXYD6	-0.128766
IFIT2	-0.128766
GPR183	-0.128766
SCG5	-0.128766
RBPMS2	-0.128766
CHI3L2	-0.15452
SH2D1B	-0.15452
MARCO	-0.15452
PDLIM3	-0.15452
SORBS2	-0.15452
FILIP1	-0.15452
TRBV7-9	-0.15452
LPCAT1	-0.180273
AEBP1	-0.180273
ROBO4	-0.180273
PLAC9	-0.180273
GPRC5C	-0.180273
ZNF667-AS1	-0.180273
MXRA8	-0.206026
SLAMF1	-0.206026
HIGD1B	-0.206026
IGKV4-1	-0.23178
HTRA3	-0.23178
GABRP	-0.23178
IGHV4-39	-0.23178
MT1M	-0.23178
KRT14	-0.23178
KRT16	-0.23178
IGHV6-1	-0.23178
CFI	-0.257533
PDLIM4	-0.257533
C1R	-0.283286
MEG3	-0.283286
AKR1C2	-0.309039
AKR1C1	-0.309039
EPAS1	-0.334793
HIGD1A	-0.334793
NRN1	-0.334793
TMSB15A	-0.334793
EGLN3	-0.334793
EGLN2	-0.334793
NCR3	-0.360546
SERPING1	-0.360546
RERG	-0.360546
TTYH1	-0.360546
IGLV2-14	-0.360546
CCDC80	-0.386299
CLDN4	-0.386299
MMP19	-0.386299
LINC01285	-0.386299
LYZ	-0.412053
KRT17	-0.412053
HAAO	-0.463559
CX3CL1	-0.463559
SCARF2	-0.463559
TDO2	-0.515066
IDO1	-0.515066
SPRR1B	-0.515066
FRMD6	-0.540819
LTF	-0.566572
IL4I1	-0.618079
EFEMP2	-0.643832
HK2	-0.669585
GNPDA2	-0.695339
ADAMTS4	-0.721092
TMC5	-0.721092
ADAMTS5	-0.721092
FKBP10	-0.746845
S100A9	-0.772599
S100A12	-0.772599
S100A8	-0.772599
SPARCL1	-0.772599
RAPGEF3	-0.772599
KCNE1	-0.772599
GPX3	-0.798352
KRT15	-0.798352
PLA2G2D	-0.824105
FRZB	-0.824105
KLRC2	-0.824105
KLRC1	-0.824105
PAX5	-0.849858
UCHL1	-0.927118
HSPA6	-0.952871
SYNPO2	-0.952871
HSPA12B	-0.952871
DNAJB4	-0.978625
C6orf15	-0.978625
DNAJA4	-0.978625
PLA2G6	-0.978625
ADM	-1.00438
APOD	-1.08164
CACNA1C	-1.08164
TSPAN12	-1.13314
UNK	-1.13314
XCL1	-1.2104
ESAM	-1.2104
COL8A1	-1.23616
SPRY1	-1.26191
SPRY4	-1.26191
PTN	-1.26191
ECM1	-1.31342
EFEMP1	-1.31342
EGR2	-1.41643
THBD	-1.51944
FSTL3	-1.51944
MAP3K12	-1.5967
FABP4	-1.64821
DKK3	-1.67396
MFAP4	-1.67396
HS2ST1	-1.69972
ADCY6	-1.72547
PGR	-1.80273
LAMP3	-1.9315
KCTD15	-1.9315
KDELR3	-1.95725
C1QA	-2.06026
KLRD1	-2.06026
IRAK3	-2.08602
IL12RB2	-2.11177
CACNA2D1	-2.11177
KLRB1	-2.11177
LRP12	-2.21478
ADCY3	-2.24054
EDNRB	-2.24054
ADCY4	-2.24054
ADCY9	-2.24054
KCNJ2	-2.29204
FPR2	-2.29204
GNG4	-2.3178
GNG11	-2.3178
FUT4	-2.44656
CRABP1	-2.44656
MS4A1	-2.52382
CD22	-2.52382
VPREB3	-2.52382
MATN3	-2.62683
CFD	-2.70409
CFB	-2.7556
IL3RA	-2.78135
TRAF5	-2.85861
PRDM1	-2.85861
SPIB	-2.85861
CLDN5	-2.85861
GPNMB	-2.98738
LPL	-2.98738
GAL	-2.98738
FXYD1	-2.98738
LTB	-3.03889
FCRLA	-3.06464
TDP2	-3.06464
CXCL14	-3.19341
CCR10	-3.19341
POU2AF1	-3.39943
SPOCK1	-3.5282
IGLL5	-3.5282
FDCSP	-3.57971
TREM1	-3.60546
CCL18	-3.60546
CCRL2	-3.63121
ICOS	-3.68272
SEMA3F	-3.78573
NISCH	-3.88875
MAOA	-4.04327
FST	-4.14628
RGMA	-4.14628
CD160	-4.19779
BTLA	-4.19779
TIGIT	-4.19779
NR2F2	-4.19779
ARRDC3	-4.24929
CHRDL1	-4.3008
HAMP	-4.3523
SERPINE2	-4.40381
CRIP2	-4.40381
ANGPTL4	-4.40381
HSD11B1	-4.42956
ADIRF	-4.48107
TWIST2	-4.60984
PTGER3	-4.6871
RGS4	-4.6871
RGS5	-4.6871
RGS16	-4.6871
GABBR1	-4.6871
STXBP1	-4.6871
MS4A6A	-4.6871
RASD1	-4.6871
SSTR2	-4.6871
CP	-4.7386
GRK5	-4.7386
LYVE1	-4.79011
TNFSF9	-4.84162
EDNRA	-4.86737
MFGE8	-4.86737
TNFRSF25	-4.91888
IL33	-4.94463
EDN2	-5.02189
NR2F1	-5.22792
FPR3	-5.25367
XCL2	-5.40819
VSIG4	-5.4597
IL1R1	-5.63997
HAS2	-5.63997
MDK	-5.66572
CD72	-5.79449
CD200	-6.10353
TNFRSF17	-6.10353
CD1C	-6.12928
MSX2	-6.18079
DLX5	-6.20654
RASSF8	-6.25805
CHL1	-6.30955
BCAM	-6.36106
FSTL1	-6.43832
SERPINI1	-6.77311
[truncated: 39 more rows]

## Sheet: 2. Marker genes P value
Gene	P value
FAM41C	1
SAMD11	1
HES4	0.389803
AGRN	6.85672e-83
TNFRSF18	0.0293767
TNFRSF4	0.0652558
ACAP3	1
MXRA8	1
ANKRD65	1
VWA1	1
MMP23B	1
GABRD	1
TNFRSF25	0.105966
PLEKHG5	0.687581
UTS2	1
TNFRSF9	0.540317
ERRFI1	1
SLC45A1	1
SLC2A5	1
H6PD	1
RBP7	1
PDPN	0.003234
FBLIM1	0.950045
MFAP2	6.30409e-07
ARHGEF10L	1
IGSF21	1
IFFO2	1
NBL1	1
PLA2G2A	1
PLA2G2D	1
CAMK2N1	1
CDA	0.281393
ALPL	0.133883
HSPG2	5.67822e-09
ZBTB40	1
C1QA	1
C1QC	1
ID3	0.890355
HMGCL	1
PAQR7	1
ZNF683	1
SFN	2.00598e-30
MAP3K6	1
FABP3	1
TINAGL1	1
COL16A1	7.68427e-09
SPOCD1	1
FAM167B	1
SYNC	1
GJA4	1
ZMYM6	1
EVA1B	1
HEYL	1.39097e-12
ZNF684	1
CITED4	1
EDN2	0.0942403
P3H1	1
TIE1	0.00174294
CDC20	0.000277406
SLC6A9	1
C1orf228	1
PTCH2	1
CYP4Z1	1
GPX7	1
PODN	1
PLPP3	1
RAVER2	1
LEPR	1.67817e-12
SGIP1	1
IL12RB2	1
DIRAS3	1
PTGER3	0.133084
FPGT	1
ST6GALNAC3	5.81729e-05
PIGK	7.45476e-05
NEXN	0.00705101
DNAJB4	1
ADGRL4	1
ADGRL2	1
RPF1	1
CYR61	1.1223e-08
HS2ST1	1
LRRC8C	1
TGFBR3	0.177491
FAM69A	1
F3	0.00536126
PTBP2	1
SNX7	1
PALMD	1
VCAM1	1.67486e-89
S1PR1	5.56324e-06
CSF1	6.65474e-21
STRIP1	1
CHI3L2	1
TMIGD3	1
RHOC	9.63045e-13
PTPN22	0.018557
OLFML3	1
TSPAN2	1
SRGAP2C	1
CD160	0.216381
FCGR1A	0.00289665
HIST2H2BF	1
MTMR11	1
C1orf54	1
CIART	1
ECM1	1
CTSK	2.17964e-06
C1orf56	1
S100A9	1
S100A12	1
S100A8	1
S100A7	1
S100A3	1
S100A2	1
S100A14	1
S100A1	1
CRTC2	2.09008e-05
ATP8B2	1
SHE	1
EFNA1	4.54518e-52
RIT1	0.014419
PMF1	1
NES	0.232428
CRABP2	1
PEAR1	1
ARHGEF11	5.56324e-06
FCRL5	1
FCRL3	1
CD1C	0.0249783
MNDA	1
PYHIN1	1
ACKR1	0.00243503
FCRL6	1
SLAMF1	1
LY9	1
ADAMTS4	1
FCER1G	7.66725e-33
MPZ	1
FCGR2A	1.09189e-05
HSPA6	1
FCGR3A	0.000139183
FCGR3B	0.018058
FCGR2B	1
FCRLA	0.557292
OLFML2B	1
SH2D1B	1
DDR2	0.0273322
RGS4	0.133084
RGS5	0.133084
XCL2	0.0613055
XCL1	1
DPT	8.80639e-07
F5	1
PRRX1	1
FMO2	1
FMO1	1
FMO4	1
DNM3OS	1
FASLG	3.75774e-29
TNFSF4	1
TNN	1
RALGPS2	1
ANGPTL1	1
ABL2	1
IER5	1
RGS16	0.133084
NPL	1
LAMC1	3.56178e-97
HMCN1	1
PTGS2	1.29454e-23
RGS13	0.627503
CFH	0.019247
ASPM	4.78706e-07
GPR25	1
PHLDA3	1
LMOD1	8.44387e-10
PPP1R12B	5.2557e-21
CHI3L1	1
PRELP	0.114795
ZBED6	1
SOX13	1
NFASC	1
NUAK2	1
SLC41A1	1
DYRK3	1
IL10	2.00718e-38
IL20	1
FCMR	1
PIGR	1
CD34	2.02266e-16
LAMB3	3.74282e-92
G0S2	1
HSD11B1	0.174474
SERTAD4-AS1	1
TRAF5	0.642356
BATF3	0.561289
CENPF	1.49016e-06
PYCR2	0.590837
LIN9	1.9213e-06
DISC1	1
GNG4	0.938258
NID1	1.60956e-25
EDARADD	1
AKT3	0.0206964
KIF26B	1
NLRP3	9.78835e-06
PXDN	1
CMPK2	0.2371
RSAD2	0.0827519
RRM2	1.76461e-08
TRIB2	1
KCNS3	1
OSR1	1
TTC32	1
MATN3	0.760062
FKBP1B	1
FAM228B	1
ADCY3	0.977384
EMILIN1	1
CGREF1	1
FNDC4	1
RBKS	1
EHD3	1
LTBP1	3.17732e-08
CRIM1	1
QPCT	1
CYP1B1	0.261744
HAAO	1
PLEKHH2	1
EPAS1	1
BCYRN1	1
STON1	1
EFEMP1	1
LINC00309	1
CNRIP1	1
FBXO48	1
ANTXR1	0.000460554
EGR4	1
ACTG2	7.12611e-09
MRPL53	1
HK2	1
GNLY	3.04119e-15
CD8A	1.28564e-35
CD8B	1
AC133644.2	1
IGKV1-12	1
IGKV1-8	1
IGKV4-1	1
IGKV1-6	1
IGKV3-7	1
IGKV1-16	1
IGKV1-17	1
IGKV2-24	1
IGKV1-27	1
IGKV2-29	1
IGKV2-30	1
IGKV1-39	1
IGKV1D-39	1
IGKV3D-20	1
IGKV3D-15	1
IGKV3D-11	1
IGKV1D-13	1
IGKV1D-8	1
MAL	1
ZNF2	1
GPAT2	1
SEMA4C	1
AFF3	1
IL1R2	0.874742
IL1R1	0.0468005
FHL2	7.09545e-35
NCK2	1.95694e-62
C2orf40	1
MALL	1
AC017002.1	1
AC017002.2	1
FBLN7	1
IL1B	1.18125e-39
IL1RN	4.79448e-23
RABL2A	1
INSIG2	1
EN1	0.389803
MARCO	1
C2orf76	1
RALB	1
LIMS2	1
CCDC74A	1
LYPD1	1
ACVR2A	1
RND3	1
TNFAIP6	1.09189e-05
GALNT5	5.81729e-05
FAP	1
NOSTRIN	1
SPC25	0.00518454
DLX2	1
ITGA6	5.32542e-83
CHN1	1
HOXD9	1
HOXD8	1
LINC01116	1
TTC30A	1
RBM45	1
FKBP7	1
TTN	4.9539e-11
PDE1A	1
FRZB	1
FAM171B	1
CALCRL	1
TFPI	1
GULP1	1
COL3A1	5.17475e-22
COL5A2	1.27715e-11
SLC40A1	1
MYO1B	1
HECW2	1
PGAP1	7.45476e-05
RFTN2	1
CTLA4	1.5777e-95
ICOS	0.337102
NRP2	2.052e-08
KLF7	1
MAP2	1
IKZF2	1
FN1	4.55467e-126
IGFBP2	7.75061e-08
IGFBP5	1.17551e-27
TNS1	1.97832e-56
SLC11A1	1
CYP27A1	1
WNT6	0.00141128
SPEG	1
OBSL1	9.90111e-22
EPHA4	0.00518454
KCNE4	1
SERPINE2	0.178003
IRS1	8.03572e-62
CCL20	1.34212e-27
ECEL1	1
COPS8	1
COL6A3	7.99417e-46
RAMP1	1
TWIST2	0.144551
GPC1	3.08181e-10
PASK	1
PDCD1	0.00357779
CHL1	0.0197552
ITPR1	5.56324e-06
BHLHE40-AS1	1
LMCD1	1
PPARG	1.056e-12
FBLN2	9.32997e-23
FGD5	1
ANKRD28	1
ZNF385D	1
UBE2E2	0.307875
RARB	1
EOMES	1
RBMS3	1
CCR4	0.0139203
CX3CR1	2.5631e-14
CCR8	0.000759616
ENTPD3-AS1	1
ZNF620	1
CTNNB1	1.50685e-119
HIGD1A	1
ZNF445	1
CLEC3B	1
TMEM158	1
SACM1L	0.2371
CXCR6	1
CCRL2	0.353311
LTF	1
COL7A1	1.68675e-06
LAMB2	5.53128e-87
SEMA3F	0.310868
HYAL2	3.96858e-06
CISH	0.0222426
ABHD14A	1
NISCH	0.285191
STAB1	1
ARF4-AS1	1
DNASE1L3	1
FAM107A	1
FAM3D	1
PTPRG	1
ADAMTS9	0.319524
MAGI1	0.255755
LINC00877	1
PROS1	0.950045
NSUN3	1
ARL6	1
CLDND1	1
COL8A1	1
FILIP1L	1
TMEM45A	1
ABI3BP	1
ZBED2	1
PHLDB2	1
GCSAM	1
CD200	0.0257677
BTLA	0.216381
CCDC80	1
TIGIT	0.216381
PLA1A	1
FSTL1	0.0167805
MYLK	1.49888e-17
KALRN	1
ITGB5	6.3146e-122
HEG1	1
ABTB1	1
GATA2	1
PLXND1	2.00718e-38
TMEM108	1
RAB6B	1
SLCO2A1	1
PCOLCE2	0.00176792
PLOD2	0.00147272
PLSCR4	1
CP	0.12808
TM4SF18	1
TM4SF1	0.186185
GPR171	1
P2RY14	1
SUCNR1	1
PTX3	0.00022528
SHOX2	1
LXN	1
RARRES1	1
B3GALNT1	1
NMD3	1
SPTSSB	1
SERPINI1	0.0104451
MECOM	1
CLDN11	1
LAMP3	1
C3orf70	1
MB21D2	1
HES1	1.15775e-12
TMEM44	1
FAM43A	1
APOD	1
TCTEX1D2	1
CPLX1	1
SPON2	3.34376e-10
MXD4	1
ZFYVE28	1
NSG1	1
MSX1	0.0246991
EVC2	1
JAKMIP1	1
S100P	1
HTRA3	1
FGFBP1	0.00264949
LDB2	1
SLIT2	1
ADGRA3	1
SOD3	1
ZCCHC4	1
TBC1D19	1
DTHD1	1
UGDH	1
UCHL1	1
GNPDA2	1
NIPAL1	1
CNGA1	1
TXK	1
SGCB	1
PDGFRA	8.50558e-39
KDR	8.8702e-113
NMU	1
HOPX	1.45274e-07
IGFBP7	0.787225
STAP1	1
FDCSP	0.368184
JCHAIN	1
CXCL8	2.84569e-37
CXCL6	2.5631e-14
CXCL1	3.25746e-25
CXCL5	2.9787e-17
CXCL3	1.55827e-13
CXCL2	6.61913e-28
EREG	0.0474934
AREG	0.950045
PARM1	1
CXCL9	0.00658714
CXCL10	3.88992e-44
CXCL11	0.00501349
CCNG2	1
CXCL13	1
RASGEF1B	1
PLAC8	1
ARHGAP24	1
PTPN13	3.40718e-20
SPARCL1	1
SPP1	2.01592e-32
HPGDS	0.00203129
EMCN	1
BANK1	1
NPNT	1
LEF1	2.74735e-15
CFI	1
ENPEP	1
TIFA	1
SYNPO2	1
PDE5A	0.232428
TNIP3	1
CCNA2	6.73248e-07
FGF2	2.07361e-45
SPRY1	1
INTU	0.00730313
PGRMC2	1
PCDH18	1
EDNRA	0.112056
DCLK2	1
SFRP2	1
TDO2	1
CTSO	0.018557
C4orf46	1
NAF1	1
CPE	1
TLL1	4.15096e-09
PALLD	1
SCRG1	1
HAND2	0.011874
HPGD	1
VEGFC	0.728162
MIR3945HG	1
PDLIM3	1
SORBS2	1
LPCAT1	1
C5orf38	1
MIR4458HG	1
SEMA5A	0.326625
ANKH	1
ADAMTS12	0.0671985
RAI14	1
IL7R	1.72882e-30
EGFLAM	1
LIFR	9.41654e-15
OSMR	9.41654e-15
DAB2	1
TTC33	1
FBXO4	1
ITGA1	2.29421e-111
FST	0.226957
ARL15	1
GZMK	1
GZMA	8.2849e-09
PLPP1	1
GAPT	1
IPO11	1
RNF180	1
ADAMTS6	0.319524
PPWD1	1
CCNB1	8.5913e-14
SMN1	1
MAP1B	1
F2RL2	0.0246991
F2R	1.68486e-39
F2RL1	1
ZBED3	1
VCAN	1.29636e-19
EDIL3	2.16514e-26
MEF2C	2.77137e-101
CETN3	1
LYSMD3	1
LUCAT1	1
ARRDC3	0.206602
NR2F1-AS1	1
NR2F1	0.0750557
MCTP1	1
ERAP2	1
RIOK2	1
PAM	1
NUDT12	0.281393
FBXL17	1
FER	0.0632257
NREP	1
EPB41L4A	1
SRP19	1
TMED7	1
CDO1	0.186185
COMMD10	1
PRR16	1
LOX	1.10284e-46
SLC12A2	1
P4HA2	2.07892e-07
PDLIM4	1
SEPT8	1
ZCCHC10	1
TCF7	0.0167805
CDKL3	1
CXCL14	0.50344
TGFBI	5.30147e-18
SPOCK1	0.384193
NME5	0.00301606
EGR1	0.00310759
MZB1	1
DNAJC18	1
HBEGF	6.97538e-15
CD14	1.51649e-08
PCDHGA10	1
ARAP3	1
PCDH1	1
SPRY4	1
FGF1	0.367126
DPYSL3	1
JAKMIP2	1
C5orf46	1
ADRB2	0.00017283
AFAP1L1	1
CARMN	1
PDGFRB	8.50164e-59
SYNPO	1
GPX3	1
SPARC	1.09245e-54
SGCD	1
MED7	1
ADAM19	1
EBF1	0.389803
CCNJL	1
SLIT3	1
KCNMB1	0.627503
GABRP	1
NEURL1B	1.67926e-13
CREBRF	1
STC2	1
MSX2	0.0234105
HRH2	1
ZNF354A	1
ADAMTS2	3.84471e-09
HNRNPH1	1
SCGB3A1	1
BTNL9	1
IRF4	1.17524e-09
FOXC1	1
PXDC1	1
NRN1	1
F13A1	1
BLOC1S5	1
EEF1E1	1
ADTRP	1
EDN1	1.58168e-22
PHACTR1	1
CD83	1.49845e-05
CAP2	1
ID4	1
TDP2	0.557292
HIST1H1A	0.301628
HIST1H3C	0.389803
HIST1H1C	1
HIST1H1E	1
HIST1H4E	1
HIST1H1D	1
HIST1H2AL	1
HIST1H1B	3.9758e-08
ZNF165	1
UBD	1
GABBR1	0.133084
RNF39	1
RPP21	1
VARS2	1
C6orf15	1
LTA	1.57384e-14
TNF	1.08672e-49
LTB	0.567595
NCR3	1
AIF1	1
C2	0.476564
CFB	0.690753
TNXB	1
PPT2	1
NOTCH4	3.72457e-25
HLA-DRB1	0.168134
HLA-DQA1	1
HLA-DQA2	1
HLA-DQB2	1
HLA-DOB	0.018557
TAP2	1
ZBTB22	1
CPNE5	1
DAAM2	0.00730313
MOCS1	1
TREM2	1
TREM1	0.360689
CUL9	1.8128e-07
CLIC5	1
RCAN2	1
PLA2G7	1
ADGRF5	1
CRISP3	1
TFAP2B	1
MCM3	1.48868e-09
RAB23	1
B3GAT2	6.2214e-08
CD109	1
COL12A1	0.0167805
FILIP1	1
ELOVL4	1
TPBG	1
NT5E	0.0561285
SMIM8	1
SLC35A1	1
RRAGD	1
ANKRD6	1
BACH2	1
MANEA-AS1	1
TSTD3	1
PRDM1	0.642356
SCML4	1
AK9	0.0671985
TRAF3IP2-AS1	1
LAMA4	1.67486e-89
COL10A1	0.590837
FAM162B	1
MAN1A1	1
GJA1	6.30621e-19
FABP7	2.24412e-13
RNF217	1
HEY2	1.67926e-13
TRMT11	1
CENPW	0.00441525
RSPO3	0.496612
THEMIS	1
SAMD3	1
CTGF	7.99417e-46
SGK1	0.22204
PDE7B	1
NHSL1	1
PLAGL1	1
STXBP5	1
PLEKHG1	1
AKAP12	0.125417
MYCT1	1
CNKSR3	1
TMEM242	1
SOD2	1
CCR6	1
SMOC2	1
LINC01615	1
THBS2	3.27221e-36
DLL1	1.67926e-13
PDGFA	2.47964e-06
AC147651.4	1
GPR146	1
ZFAND2A	1
FOXK1	1
RADIL	1
RBAK-RBAKDN	1
CCZ1	1
CYTH3	1
CCZ1B	1
THSD7A	0.319524
SCIN	0.00041584
MEOX2	1
AGR2	1
AGR3	1
TWIST1	1.84687e-13
RAPGEF5	1
IL6	1.40423e-95
GPNMB	0.586646
HOXA3	1
HOXA10	1
CPVL	1
WIPF3	9.62708e-25
AQP1	0.00705101
FKBP9	1
EPDR1	1
SFRP4	1
TRGC2	1
TRGC1	1
TRGV10	1
TRGV9	1
TRG-AS1	1
TRGV5	1
TRGV3	1
SUGCT	1
INHBA	1.49845e-05
PSMA2	7.96662e-13
AEBP1	1
RAMP3	1
IGFBP3	9.19175e-36
GRB10	7.26192e-13
PHKG1	1
CLDN4	1
ELN	6.40738e-25
GTF2IRD2	1
GNAI1	3.64523e-82
CD36	1
HGF	1.15717e-45
CACNA2D1	1
ABCB1	1
STEAP4	1
STEAP1	1
MTERF1	1
TFPI2	1
GNG11	0.938258
COL1A2	5.78988e-76
SGCE	1
PEG10	1
PDK4	1
DLX5	0.0226341
TAC1	2.22793e-15
BRI3	1
AZGP1	3.13896e-09
STAG3	0.0543467
PCOLCE	5.53804e-05
ACHE	1
SERPINE1	3.77273e-27
CLDN15	1
RASA4	1
POLR2J2	1
FBXL13	1
LRRC17	1
KMT2E-AS1	1
CCDC71L	1
LAMB1	1.23258e-94
LRRN3	1
LSMEM1	1
CAV2	0.00518454
WNT2	5.89454e-21
TSPAN12	1
ING3	1
AASS	1
HILPDA	1
FLNC	1
STRIP2	1
MEST	1
PODXL	1
BPGM	1
CALD1	7.12611e-09
PTN	1
CLEC5A	1
TRBV2	1
TRBV5-1	1
TRBV4-2	1
TRBV9	1
TRBV6-5	1
TRBV7-6	1
TRBV7-9	1
TRBV19	1
TRBV20-1	1
TRBV27	1
TRBC1	1
PIP	3.81216e-09
ZNF783	1
RARRES2	0.00481314
GIMAP1	1
TMEM176B	1
NOS3	0.000307551
WDR86	1
LINC00685	1
IL3RA	0.678981
XG	1
MXRA5	1
ARHGAP6	1
EGFL6	1
GPM6B	1
CTPS2	0.0736373
KLHL15	1
CXorf21	1
GK	1
TMEM47	1
PRRG1	1
SRPX	1
TSPAN7	1
LINC01281	1
MED14OS	1
MAOA	0.247973
CXorf36	1
CHST7	1.37081e-07
TIMP1	2.5238e-23
CFP	0.206558
ZNF182	1
PCSK1N	1
PRAF2	1
FOXP3	1.24432e-32
SHROOM4	1
MAGEH1	1
FAAH2	1
VSIG4	0.0576972
HEPH	1
STARD8	0.874742
EFNB1	1.37128e-93
CHIC1	1
TSIX	1
UPRT	0.00518454
P2RY10	1
SYTL4	1
GLA	1
HNRNPH2	1
ARMCX4	1
TMSB15A	1
TCEAL7	1
TCEAL1	1
CHRDL1	0.196805
CAPN6	1
DCX	1
PLS3	1
KLHL13	6.46451e-05
SMARCA1	1
GPC3	0.00406072
SMIM10	1
ZNF449	1
FHL1	1
MAP7D3	1
CD40LG	1.03593e-05
HMGB3	1
HAUS7	1
BGN	1.31784e-49
F8A1	1
CLIC2	1
TDRP	1
MYOM2	1.3076e-08
ANGPT2	0.602887
DEFB1	1
BLK	5.53904e-52
DLC1	0.874742
MSR1	1
ZDHHC2	1
PDGFRL	1
MTUS1	1
CSGALNACT1	1.37081e-07
LPL	0.586646
ATP6V1B2	1
BMP1	2.46694e-13
C8orf58	1
EGR3	1
TNFRSF10C	1
TNFRSF10D	1
LOXL2	1
NKX3-1	1
STC1	1
ADAM28	1
ADAMDEC1	1
DPYSL2	1
PTK2B	1.31803e-69
CLU	1
DCTN6	1
RBPMS	1
UBXN8	1
RNF122	1
ZNF703	1
ADGRA2	1
FGFR1	4.24804e-31
IDO1	1
AP3M2	1
PLAT	8.26842e-17
CEBPD	0.00243503
SNAI2	1.15308e-19
SOX17	0.00658714
FAM110B	1
TOX	1
MYBL1	0.0879311
PREX2	0.2371
SULF1	1
MSC	1
SBSPON	0.319524
RDH10	1
UBE2W	0.307875
PI15	1
HEY1	1.67926e-13
ZBTB10	1
FABP5	1
FABP4	1
CA2	0.00705101
MMP16	5.60708e-25
RUNX1T1	0.000132087
GEM	1
SDC2	1.99942e-39
CPQ	1
MATN2	1
OSR2	1
BAALC	1
CTHRC1	0.00730313
LRP12	0.992147
ANGPT1	6.97538e-15
AARD	1
TNFRSF11B	1
NOV	5.54617e-20
ENPP2	1
COL14A1	9.66516e-09
HAS2	0.0468005
FBXO32	1
LINC00861	1
MYC	2.44125e-90
PTK2	3.02404e-88
SLC45A4	1
PTP4A3	9.61797e-46
ARC	1
LYNX1	1
LY6D	1
CBWD1	1
GLIS3	1
IL33	0.103029
LURAP1L	1
MPDZ	0.571981
LINC01235	1
SNAPC3	1
BNC2	1
PLIN2	1
CDKN2A	0.993561
TOPORS	3.12056e-05
AQP3	1
IL11RA	1
CCL19	4.24774e-28
RUSC2	1
CD72	0.0386362
TPM2	4.68843e-10
HRCT1	1
PAX5	1
CNTNAP3B	1
FAM27C	1
CBWD5	1
CBWD3	1
MAMDC2	1
KLF9	1
ABHD17B	1
ALDH1A1	1
PCSK5	1
TLE4	3.83705e-20
NTRK2	7.12611e-09
GAS1	1
CTSL	0.496612
S1PR3	4.66515e-06
GADD45G	5.28736e-06
NFIL3	1
OGN	0.114795
ASPN	1.04158e-08
ECM2	1
ZNF169	1
FBP1	1
C9orf3	1
SLC35D2	1
TMOD1	0.00101482
COL15A1	3.62139e-09
ZNF189	1
NIPSNAP3B	1
TMEM38B	1
PTPN3	0.0474934
SVEP1	1
COL27A1	0.00658714
TNFSF15	1
TNFSF8	1
TNC	1
GSN	1.05473e-15
ZBTB26	1
RABGAP1	1
MIR181A2HG	1
OLFML2A	1
ANGPTL2	1
STXBP1	0.133084
SH2D3C	0.267842
ENG	1.26911e-12
AK1	0.00373255
LCN2	1.45533e-24
CERCAM	1
PKN3	5.56324e-06
IER5L	1
PRRX2	1
COL5A1	4.28744e-60
FCN1	0.00863539
OLFM1	1
NOTCH1	5.14832e-95
EGFL7	1
PTGDS	1
CLIC3	1
ABCA2	1
NRARP	1.40774e-06
LINC01001	1
MIR210HG	1
TMEM80	1
MRPL23	1
IGF2	1.41259e-37
CD81	1
KCNQ1OT1	1
CDKN1C	1.57397e-07
HBB	1
FAM160A2	1
TIMM10B	1
OLFML1	1
TRIM66	1
ST5	1
DENND5A	1
ADM	1
MTRNR2L8	1
LYVE1	0.121502
MRVI1	0.232428
DKK3	1
SPON1	0.319524
PDE3B	0.326625
SAA2	1
SAA1	5.97951e-30
FIBIN	1
FBXO3	1
FJX1	1
PRR5L	1
C11orf96	1
CREB3L1	1
MDK	0.0455608
SLC39A13	1
C1QTNF4	1
APLNR	1
RTN4RL2	1
SERPING1	1
GLYATL2	1
MS4A6A	0.133084
MS4A4A	1
MS4A7	1
MS4A1	0.816757
SDHAF2	1
FADS3	1
BEST1	1
SCGB2A1	5.56738e-05
SCGB1D2	3.81216e-09
SCGB2A2	3.81216e-09
C11orf95	1
VEGFB	0.196346
NRXN2	1
RASGRP2	1
PPP2R5B	8.49288e-05
BATF2	0.00147272
ARL2	1
AP000769.1	1
FAM89B	1
EFEMP2	1
CTSW	1
CD248	1.70929e-14
PELI3	1
CTSF	0.018557
ACY3	1
GAL	0.586646
MRGPRF	1
ANO1	1
FOLR2	1
PDE2A	1
ARHGEF17	1
P4HA3	2.07892e-07
PGM2L1	1
SLCO2B1	1
LRRC32	1
NDUFC2	1
ALG8	1
PRCP	1
SYTL2	1
EED	0.164255
PRSS23	1
FZD4	0.00637412
ANKRD49	1
FUT4	0.862426
AMOTL1	0.551661
CCDC82	1
PGR	1
C11orf70	1
YAP1	2.35215e-20
MMP7	7.62613e-28
MMP1	1.71476e-38
MMP3	1.0075e-31
PDGFD	3.17732e-08
KBTBD3	1
CWF19L2	1
POU2AF1	0.426885
LAYN	1
CRYAB	2.08176e-18
HSPB2	0.496612
SDHD	1
ZBTB16	8.10094e-30
NNMT	0.476564
RBM7	1
TAGLN	2.54527e-08
FXYD6	1
PHLDB1	1
CCDC84	1
MCAM	8.28477e-08
THY1	3.86832e-06
OAF	1
TBCEL	1
CRTAM	1
VWA5A	1
NRGN	1
ESAM	1
ROBO4	1
FEZ1	1
NTM	1
JAM3	4.30663e-73
AKR1C2	1
AKR1C1	1
AKR1C3	0.243193
CALML5	1
IL2RA	1.4898e-30
ITIH5	1
CCDC3	1
FAM171A1	1
MRC1	0.00079637
COMMD3	1
MSRB2	1
OTUD1	1
PRTFDC1	1
BAMBI	8.96002e-05
ZEB1-AS1	1
ZEB1	3.49143e-05
NRP1	2.20794e-08
ANKRD30A	1
CSGALNACT2	1.37081e-07
CXCL12	2.91625e-63
AGAP4	1
AGAP9	1
VSTM4	1
PRKG1	2.06239e-09
DKK1	2.22636e-12
BICC1	1
FAM13C	1
CDK1	3.74475e-18
RTKN2	1
EGR2	1
PBLD	1
PALD1	1
PRF1	2.94908e-12
PLAU	1.45413e-21
ZNF503	1
PLAC9	1
MMRN2	1
SNCG	1
ADIRF	0.165949
PTEN	1.34659e-89
ANKRD22	1
ACTA2	9.39759e-07
CH25H	1
IFIT2	1
IFIT3	0.0827519
IFIT1	0.0827519
HHEX	1
PLCE1	1
SORBS1	2.66629e-44
TCTN3	1
MORN4	1
DNMBP	1
NDUFB8	1
DUSP5	1
AFAP1L2	1
GRK5	0.12808
BAG3	0.0594572
WDR11	1
NSMCE4A	1
HTRA1	1
CPXM2	1
ADAM12	0.675496
MKI67	1.49016e-06
ADAM8	1
CACNA1C	1
NDUFA9	1
VWF	6.18474e-12
ZNF384	0.267842
LAG3	0.583781
C1S	0.978435
C1R	1
RBP5	1
CD163	6.85245e-26
CLEC4E	1
MFAP5	3.41486e-07
PHC1	0.018058
KLRG1	1
A2M	1.34212e-27
LINC00987	1
KLRB1	1
CLECL1	1
KLRF1	1
OLR1	1
KLRD1	1
KLRC3	1
KLRC2	1
KLRC1	1
APOLD1	1
DDX47	1
GPRC5A	1
EMP1	1
MGP	4.54921e-11
RERG	1
EPS8	1
KCNJ8	0.0827519
ABCC9	1
LRMP	1
RASSF8	0.0211506
STK38L	1
PPFIBP1	1
KLHL42	0.0576972
PTHLH	1
TMTC1	1
H3F3C	0.663549
FGD4	1
CPNE8	1
NELL2	1
AMIGO2	1
RAPGEF3	1
PFKM	1
ZNF641	1
ADCY6	1
RND1	1.49016e-06
KMT2D	1.49888e-17
CERS5	1
ACVRL1	1.49845e-05
GRASP	1
KRT86	1
KRT81	1
KRT6B	1
KRT6A	1
KRT5	1
TNS2	1
IGFBP6	1
ZNF740	1
MAP3K12	1
HOXC6	1
HOXC9	1
HOXC8	2.16935e-05
ITGA5	3.03534e-125
PDE1B	1
MUCL1	3.81216e-09
GDF11	0.00141128
SARNP	0.0015296
MMP19	1
IL23A	1.29454e-23
NDUFA4L2	1
R3HDM2	1
ARHGEF25	1
RASSF3	1
MSRB3	1
LLPH	1
TMBIM4	1
IRAK3	1
IFNG	8.27608e-40
CPM	1
LYZ	1
LINC01481	1
PTPRB	7.05011e-11
TSPAN8	1
BBS10	1
CSRP2	1
C12orf29	1
TMTC3	1
LUM	1.76573e-65
DCN	8.50164e-59
SOCS2	0.0463627
NR2C1	1
NTN4	1
ELK3	1
IGF1	1.46627e-47
GLT8D2	1
HCFC2	1
NUAK1	1
TMEM119	1
ACACB	1
HVCN1	1
SDS	1
TBX3	1
TESC	1
HSPB8	0.168134
OASL	0.0827519
VPS33A	1
HCAR2	1
HCAR3	1
PITPNM2	0.505575
SCARB1	1
SLC15A4	1
STX2	0.407807
ZNF26	1
ZNF268	1
GJB2	1
PABPC3	1
RASL11A	1
PAN3	1
FLT1	3.96329e-77
MEDAG	1
FRY	1
PDS5B	2.37538e-08
DCLK1	1
SMAD9	0.301628
POSTN	3.86239e-50
DGKH	1
SERP2	1
TPT1-AS1	1
SUCLA2	1
SETDB2	1
SPRYD7	1
INTS6	1
THSD1	0.319524
PCDH17	1
PCDH9	1
TBC1D4	2.09008e-05
CLN5	1
FBXL3	1
EDNRB	0.977384
GPC6	1.86896e-05
GPR18	1
GPR183	1
ITGBL1	1
KDELC1	1
EFNB2	9.9039e-44
IRS2	0.00658714
COL4A1	2.42147e-52
COL4A2	5.13064e-15
ING1	1
F10	0.00254357
TMEM255B	1
GAS6	1
AL589743.1	1
RNASE4	1
RNASE1	1
TRAV1-2	1
TRAV2	1
TRAV3	1
TRAV4	1
TRAV12-1	1
TRAV8-2	1
TRAV13-1	1
TRAV12-2	1
TRAV8-4	1
TRAV13-2	1
TRAV14DV4	1
TRAV9-2	1
TRAV12-3	1
TRAV8-6	1
TRAV16	1
TRAV17	1
TRAV19	1
TRAV21	1
TRDV1	1
TRAV29DV5	1
TRAV38-2DV8	1
TRDC	1
TRAC	1
MMP14	4.7163e-33
CHMP4A	1
ADCY4	0.977384
NFATC4	1
GZMH	1.86896e-05
GZMB	9.96128e-11
NOVA1	1
COCH	1
HEATR5A	1
EGLN3	1
CFL2	1
BRMS1L	1
MBIP	1
CLEC14A	1
SEC23A	0.456322
FRMD6	1
NID2	1
PTGDR	0.0543467
PTGER2	1
FERMT2	0.00586224
CDKN3	4.78706e-07
DLGAP5	8.28477e-08
L3HYPDH	1
SNAPC1	1
RHOJ	1
HSPA2	1
CHURC1	1
GALNT16	5.81729e-05
SYNJ2BP	0.00103575
MED6	1
PGF	0.675496
BATF	0.00538834
TGFB3	2.78427e-29
VASH1	1
DIO2	1
FLRT2	1
FBLN5	1
LGMN	0.0474934
SERPINA1	2.34335e-05
TCL1A	1
GSKIP	1
EML1	1
DLK1	6.89368e-44
MEG3	1
PLD4	1
AHNAK2	1
JAG2	1.67926e-13
CRIP2	0.178003
CRIP1	1
IGHA2	1
IGHG4	1
IGHG2	1
IGHA1	1
IGHG1	1
IGHG3	1
IGHD	1
IGHM	1
IGHV1-2	1
IGHV1-3	1
IGHV4-4	1
IGHV3-7	1
IGHV3-11	1
IGHV3-15	1
IGHV1-18	1
IGHV3-20	1
IGHV3-21	1
IGHV3-23	1
IGHV1-24	1
IGHV2-26	1
IGHV3-30	1
IGHV4-31	1
IGHV3-33	1
IGHV4-34	1
IGHV4-39	1
IGHV3-43	1
IGHV1-46	1
IGHV3-48	1
IGHV3-49	1
IGHV5-51	1
IGHV3-53	1
IGHV4-59	1
IGHV4-61	1
IGHV3-66	1
IGHV3-73	1
IGHV3-74	1
NDN	1
ATP10A	1
FAN1	1
SCG5	1
GOLGA8A	1
MEIS2	1
THBS1	9.34249e-31
GPR176	1
DLL4	3.49038e-53
CHAC1	1
NUSAP1	4.78706e-07
NDUFAF1	1
MAPKBP1	1
STARD9	1
MAP1A	1
C15orf48	1
FBN1	2.85856e-53
FGF7	0.000359129
DTWD1	1
PIGB	1
NEDD4	0.00020283
LINC00926	1
AQP9	1
CCNB2	8.5913e-14
RORA	0.00441525
C2CD4B	1
RBPMS2	1
RASL12	1
CILP	0.301628
SMAD6	1
ITGA11	2.50837e-109
LRRC49	1
LOXL1	1
ISLR	1
SNX33	1
CSPG4	0.00122733
DNAJA4	1
CRABP1	0.862426
MTHFS	1
ST20	1
BCL2A1	1
GOLGA6L9	1
NMB	0.00264949
HAPLN3	1
MFGE8	0.112056
RHCG	1
MESP1	1
ANPEP	0.0632257
FURIN	1.04861e-57
SLCO3A1	1
RGMA	0.226957
NR2F2-AS1	1
NR2F2	0.216381
IGF1R	1.5777e-95
FAM234A	1
METRN	1
TMEM204	1
SNHG9	1
NPW	1
SLC9A3R2	1.00774e-38
PRSS21	1
ZG16B	1
ADCY9	0.977384
LINC01569	1
GLIS2	8.85843e-12
CORO7	1
VASN	1
RMI2	1
TNFRSF17	0.0257677
NPIPA1	1
NOMO1	1
MYH11	3.45782e-14
ARL6IP1	1
ITPRIPL2	1
TMC5	1
GPRC5B	1
IGSF6	1
OTOA	1
SDR42E2	1
PLK1	9.06036e-20
APOBR	1
CD19	2.17964e-06
PRRT2	0.000575657
GDPD3	1
PYDC1	1
ITGAM	1.2612e-48
ITGAX	1.59822e-49
TGFB1I1	8.85843e-12
ZNF267	1
MMP2	1.08399e-110
CES1	1
AMFR	1
MT2A	1
MT1E	1
MT1M	1
MT1A	1
MT1F	1
MT1G	1
MT1X	1
PLLP	1
CCL22	4.26839e-41
CX3CL1	1
DOK4	1
KIFC3	0.00705101
MMP15	7.70236e-07
CDH11	1.66921e-54
CDH5	2.38696e-108
RRAD	1
FBXL8	1
EXOC3L1	1
TPPP3	1
C16orf86	1
SLC12A4	1
DDX19A	1
ZNF23	1
ZFHX3	1
ZFP1	0.0273322
BCAR1	6.21159e-103
PLCG2	4.85648e-09
CDH13	0.00705101
DNAAF1	1
TAF1C	1
CRISPLD2	1
ZCCHC14	1
CBFA2T3	1
CPNE7	1
FAM157C	1
NXN	1
SCARF1	1
SERPINF1	1
HIC1	1
P2RX5	1
P2RX1	1
SPNS2	1
VMO1	1
CAMTA2	1
MIR497HG	1
CLEC10A	1
DVL2	8.70574e-24
GPS2	1
NLGN2	1
TNFSF12	3.12348e-05
SENP3	1
CD68	1.17551e-27
TMEM88	1
PIGL	1
LRRC75A	1
CCDC144A	1
TNFRSF13B	1.03274e-05
MPRIP	1
FLCN	1
RASD1	0.133084
SMCR5	1
ALKBH5	1
MFAP4	1
ULK2	1
MTRNR2L1	1
NEK8	1
NSRP1	1
CPD	1
EVI2B	1
LRRC37B	1
TMEM98	1
CCL2	1.68629e-41
CCL8	1
CCL13	1
MMP28	1
CCL5	2.12501e-43
CCL23	1
CCL18	0.360689
CCL3	1.44055e-42
CCL4	1.9577e-36
CCL4L2	1
ARHGAP23	1
PLXDC1	2.82729e-05
STAC2	1
FBXL20	1
TOP2A	1.37607e-09
IGFBP4	1
TNS4	1
CCR7	4.25812e-25
KRT23	1
KRT15	1
KRT14	1
KRT16	1
KRT17	1
P3H4	1
FKBP10	1
PLEKHH3	1
CCR10	0.50344
RAMP2	1
AOC3	0.000759616
ARL4D	1
MEOX1	1
HDAC5	0.00934776
GJC1	1
HIGD1B	1
TBKBP1	1
COPZ2	1
HOXB2	1
HOXB-AS1	1
HOXB3	1
COL1A1	1.67622e-79
MMD	1
SEPT4	1
TBX2-AS1	1
TBX2	0.261744
NACA2	1
MRC2	1.49016e-06
TANC2	1
ACE	1.09189e-05
CD79B	0.436724
SNHG25	1
PECAM1	1.28572e-86
ABCA8	1
ABCA6	1
ABCA10	1
KCNJ2	0.950045
SSTR2	0.133084
GPRC5C	1
CD300E	1
CASKIN2	1
UNK	1
CYGB	1
MXRA7	1
BIRC5	2.01173e-15
C1QTNF1	1
BAHCC1	1
METRNL	1
TYMS	6.82515e-05
NDC80	4.78706e-07
DLGAP1-AS2	1
ARHGAP28	1
PTPRM	0.2371
RAB12	1
TWSG1	1
APCDD1	1
TUBB6	0.0736373
LDLRAD4	1
ANKRD29	1
LAMA3	1.5777e-95
ZNF521	1
RNF165	1
SMAD4	9.41654e-15
POLI	1
ZNF532	1
RNF152	1
CCDC102B	1
ZNF516	1
PARD6G-AS1	1
PARD6G	1
CPXM1	1
PCED1A	1
ADAM33	1
HSPA12B	1
BMP2	9.62708e-25
LAMP5	1
JAG1	4.26652e-12
RIN2	1
THBD	1
CD93	1
CST3	0.0827519
NINL	3.12056e-05
REM1	1
ID1	0.384193
COX4I2	1
FOXS1	1
DNMT3B	1
SNTA1	1
PROCR	1
MYL9	3.13543e-14
TGM2	1.70929e-14
LBP	3.33419e-24
PPP1R16B	1
PKIG	1
WISP2	1
PI3	1.70929e-14
SLPI	1
WFDC2	1
UBE2C	8.26294e-44
PLTP	0.456322
MMP9	8.35996e-38
CD40	1.88676e-26
SULF2	1
PTGIS	1
SNAI1	3.15133e-90
CEBPB	5.89454e-21
TSHZ2	1
ZBP1	1
NPEPL1	1
PPP1R3D	1
LAMA5	5.19176e-110
ZBTB46	1
SOX18	0.011874
PCMTD2	1
MADCAM1	1
FSTL3	1
PALM	1
CFD	0.718155
JSRP1	1
TLE2	0.00406072
MATK	0.014419
EBI3	1
TMIGD2	1
LRG1	2.64819e-06
SEMA6B	1
CAPS	1
TNFSF9	0.114795
CD70	3.7668e-06
TNFSF14	1
C3	0.0326624
TRIP10	1
INSR	0.000968702
ZNF358	1
STXBP2	5.53804e-05
MCEMP1	1
FCER2	0.0315562
CD209	1
NDUFA7	1
KANK3	1
ANGPTL4	0.178003
COL5A3	6.46451e-05
PPAN	1
ICAM4	1
KANK2	1
DOCK6	1
CCDC151	1
CNN1	2.54527e-08
ZSWIM4	1
SYDE1	1
NOTCH3	1.04041e-14
MED26	1
PLVAP	1
FAM129C	1
ARRDC2	1
IFI30	1
PDE4C	1
GDF15	1
BORCS8	1
NDUFA13	1
ZNF626	1
PLEKHF1	1
ZNF507	1
FAAP24	1
KCTD15	1
WTIP	1
SCGB1B2P	1
FXYD3	1
LGI4	1
FXYD1	0.586646
FXYD7	1
HAMP	0.187029
CD22	0.816757
FFAR2	1
TMEM147-AS1	1
HSPB6	2.63969e-06
NFKBID	1
ALKBH6	1
COX7A1	1
ZNF345	1
ZNF383	1
ZFP30	1
PPP1R14A	6.75974e-12
CAPN12	1
FCGBP	1
LTBP4	1.70929e-14
RAB4B	1
EGLN2	1
AXL	1
PCAT19	1
LINC01480	1
CD79A	0.12853
CNFN	1
CXCL17	1
PINLYP	1
PLAUR	2.00833e-28
BCAM	0.018557
APOE	0.0906229
APOC1	1
APOC2	0.0879311
GPR4	1
DMPK	1
PTGIR	1
INAFM1	1
C5AR1	1
EHD2	1
RASIP1	1
PLEKHA4	1
RCN3	1
ADM5	1
CPT1C	1
IL4I1	1
SPIB	0.642356
CLEC11A	1
KLK1	1
KLK6	1
NKG7	0.0404053
SIGLEC14	1
FPR1	0.00301606
FPR2	0.950045
FPR3	0.0733401
ZNF649	1
ZNF701	1
ZNF28	1
ZNF525	1
LILRA5	0.301628
TTYH1	1
CDC42EP5	1
LAIR2	1
KIR2DL4	1
PPP1R12C	1.37607e-09
ZNF787	1
ZNF583	1
ZNF667-AS1	1
ZNF543	1
ZNF550	1
UBE2M	0.307875
MZF1-AS1	1
DGCR6	1
CLDN5	0.642356
SCARF2	1
LZTR1	0.0576972
IGLV4-69	1
IGLV8-61	1
IGLV6-57	1
IGLV1-51	1
IGLV1-47	1
IGLV7-46	1
IGLV5-45	1
IGLV1-44	1
IGLV1-41	1
IGLV1-40	1
IGLV1-36	1
IGLV3-27	1
IGLV3-25	1
IGLV2-23	1
IGLV3-21	1
IGLV3-19	1
IGLV2-18	1
IGLV2-14	1
IGLV2-11	1
IGLV3-10	1
IGLV3-9	1
IGLV2-8	1
IGLV3-1	1
IGLL5	0.384193
IGLC2	1
IGLC3	1
VPREB3	0.816757
MMP11	4.16915e-15
DERL3	1
MIF-AS1	1
SUSD2	1
GGT5	0.0736373
MIAT	1
TTC28	1
LIF	2.35099e-32
OSM	1.47347e-23
SMTN	0.000460554
TIMP3	3.9004e-12
HMOX1	1
RASD2	2.82729e-05
RBFOX2	1
IFT27	1
KCTD17	0.0576972
IL2RB	1.51649e-08
C1QTNF6	1
CARD10	1
LGALS2	1
PLA2G6	1
MAFF	1
KDELR3	1
CBX6	0.398728
APOBEC3A	1
APOBEC3F	1
CBX7	0.00342897
PDGFB	1.23858e-67
TNFRSF13C	0.000259228
CENPM	0.000377343
FAM109B	1
RNU12	1
A4GALT	1
[truncated: 39 more rows]
