# Supplementary material for: SIDISH Identifies High-Risk Disease-Associated Cells and Biomarkers by Integrating Single-Cell Depth and Bulk Breadth
Source: Research Square preprint supplement (doi:10.21203/rs.3.rs-5921999/v1), 2025-03-10
Supplement: Supplementary file 1 [file b429df9dac259976b5cf776c.pdf]

## Supplementary Figures

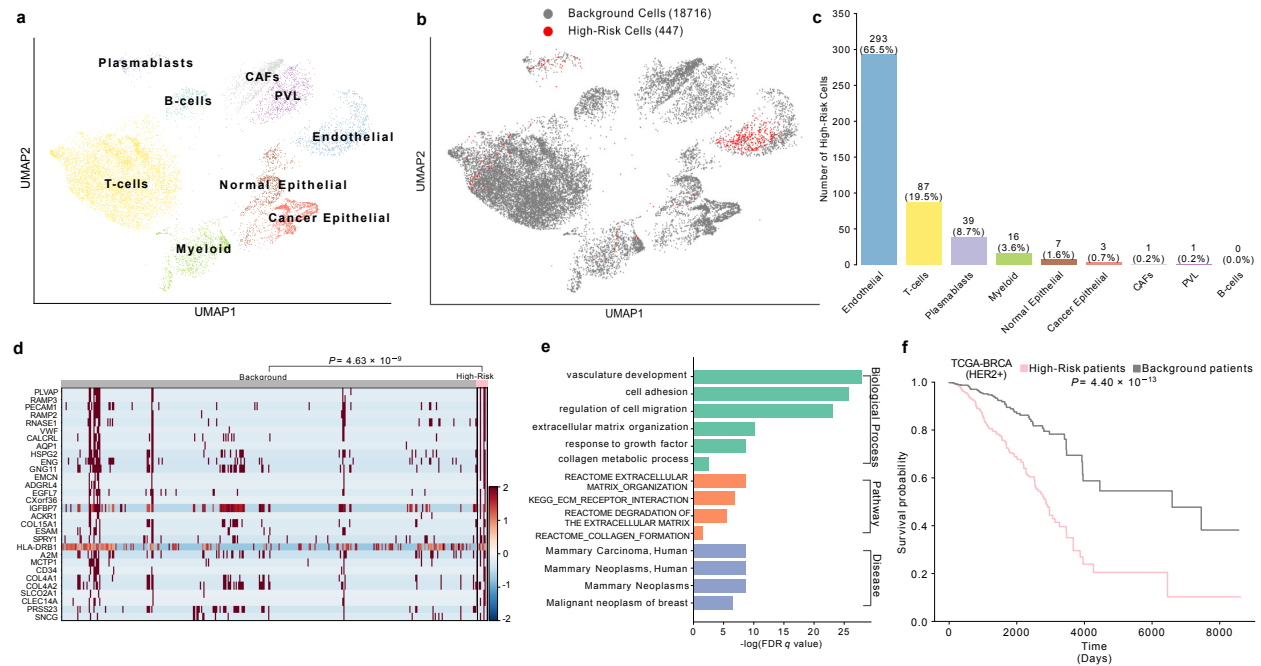

**Fig. S1: Full Analysis of HER2+ Breast Cancer Subtype.** **a**, UMAP plot showing the clustering of identified cell types, including cancer epithelial cells, cancer-associated fibroblasts (CAFs), perivascular-like (PVL) cells, normal epithelial cells, myeloid cells, T-cells, B-cells, plasmablasts, and endothelial cells. **b**, UMAP visualization of the HER2+ dataset, containing 19,163 cells. High-Risk cells (447) identified by SIDISH are shown in red, while Background cells (18,716) are depicted in gray. **c**, Bar plot showing the distribution of High-Risk cells across various cell types. **d**, Heatmap of differential gene expression analysis between High-Risk and Background cells. High-Risk cells exhibit significantly higher expression of marker genes ( $P = 4.63 \times 10^{-9}$ ).  $P$  values were calculated using a one-sided Mann-Whitney U test to highlight differences in expression levels between High-Risk and Background cells. **e**, Functional enrichment analysis, including GO terms, pathways, and disease terms, highlights upregulated genes associated with tumor aggressiveness and invasive behavior. **f**, Kaplan-Meier survival analysis on the TCGA-BRCA bulk data demonstrates significantly poorer survival outcomes for patients with higher expression levels of marker genes identified by SIDISH ( $P = 4.40 \times 10^{-13}$ ). High-Risk patients (pink) show a distinct separation from Background patients (gray), validating SIDISH's predictive power.  $P$  values were calculated using the log-rank test to compare survival curves between High-Risk and Background patient groups across all cohorts.

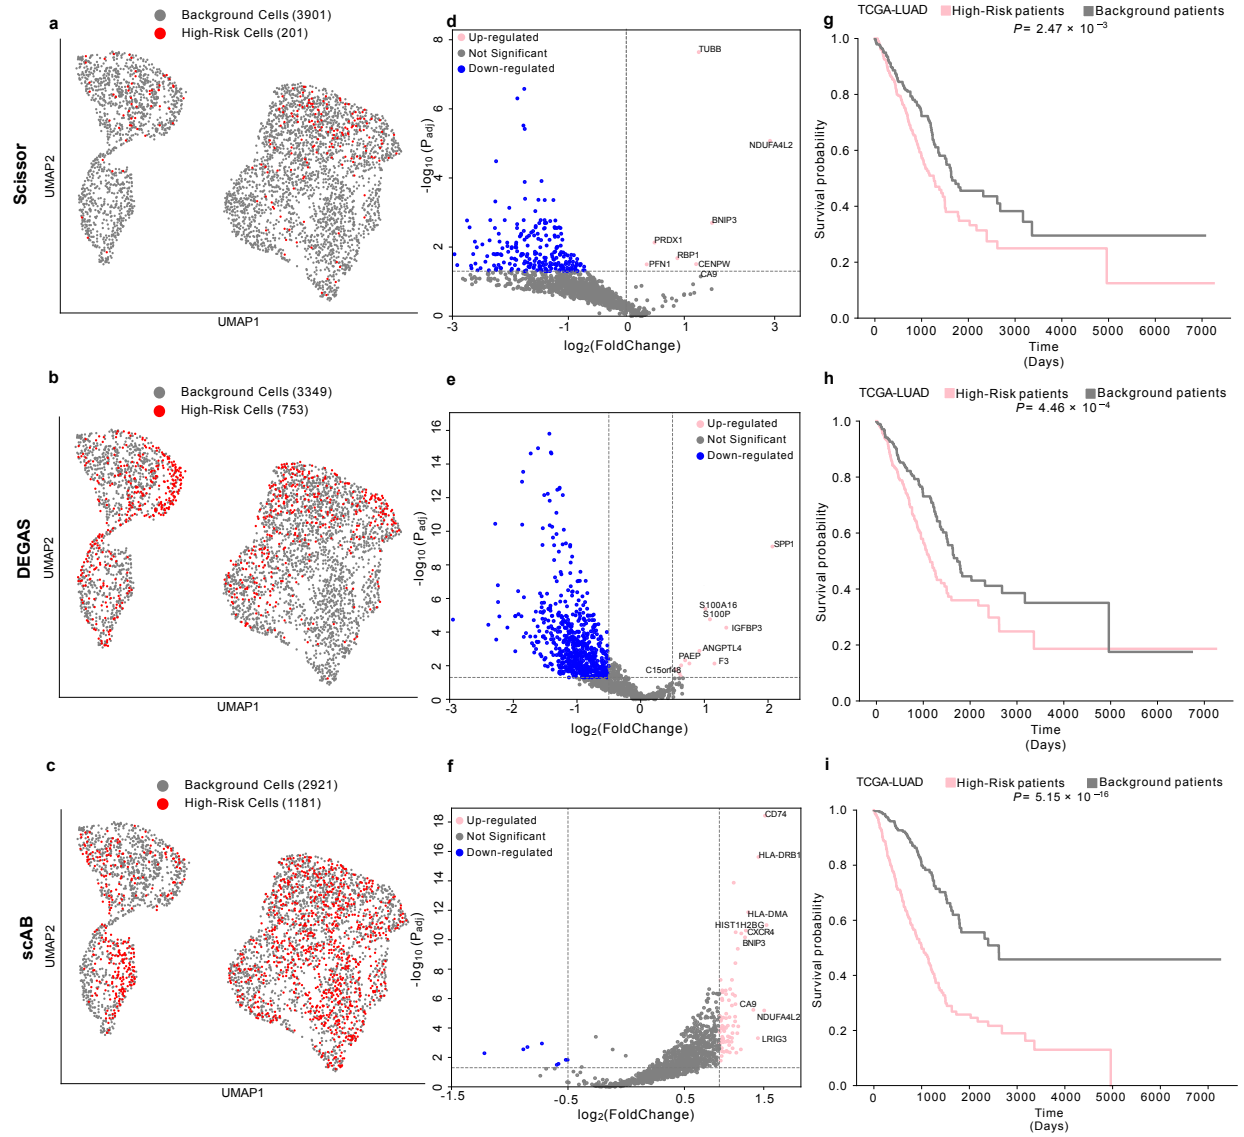

**Fig. S2: Overview of Existing Methods Results in the LUAD Dataset.** **a-c**, UMAP visualizations of High-Risk cells identified by Scissor (**a**), DEGAS (**b**), and scAB (**c**). For the Scissor method, cells classified as Scissor+ were considered High-Risk. For DEGAS, cells with a score above 0.5 were classified as High-Risk. For scAB, any cells not labeled as "Other" were classified as High-Risk. **d-f**, Volcano plots for Scissor (**d**), DEGAS (**e**), and scAB (**f**), highlighting upregulated and downregulated genes. **g-i**, Kaplan-Meier survival plots based on TCGA-LUAD patient data for Scissor (**g**), DEGAS (**h**), and scAB (**i**). Upregulated genes were used to stratify patients based on their expression levels. A broader separation between survival curves indicates better stratification between patients at higher risk of death and those at lower risk. *P* values were calculated using the log-rank test to compare survival curves between High-Risk and Background patient groups.

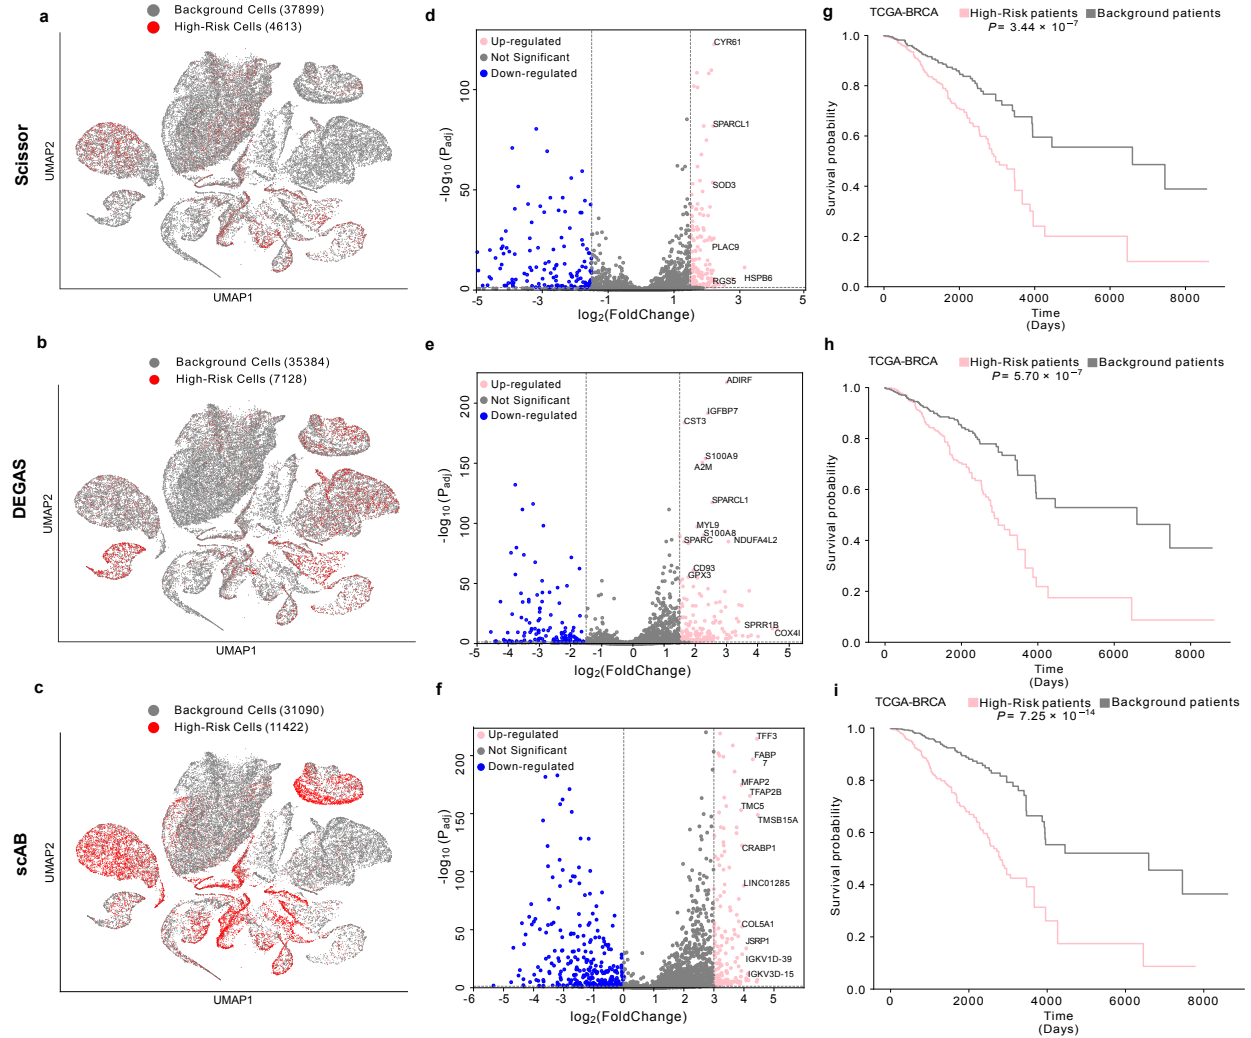

**Fig. S3: Overview of Existing Methods Results in the BRCA Dataset.** **a-c**, UMAP visualizations of High-Risk cells identified by Scissor (**a**), DEGAS (**b**), and scAB (**c**). For the Scissor method, cells classified as Scissor+ were considered High-Risk. For DEGAS, cells with a score above 0.5 were classified as High-Risk. For scAB, any cells not labeled as "Other" were classified as High-Risk. **d-f**, Volcano plots for Scissor (**d**), DEGAS (**e**), and scAB (**f**), highlighting upregulated and downregulated genes. **g-i**, Kaplan-Meier survival plots based on TCGA-BRCA patient data for Scissor (**g**), DEGAS (**h**), and scAB (**i**). Upregulated genes were used to stratify patients based on their expression levels. A broader separation between survival curves indicates better stratification between patients at higher risk of death and those at lower risk.  $P$  values were calculated using the log-rank test to compare survival curves between High-Risk and Background patient groups.

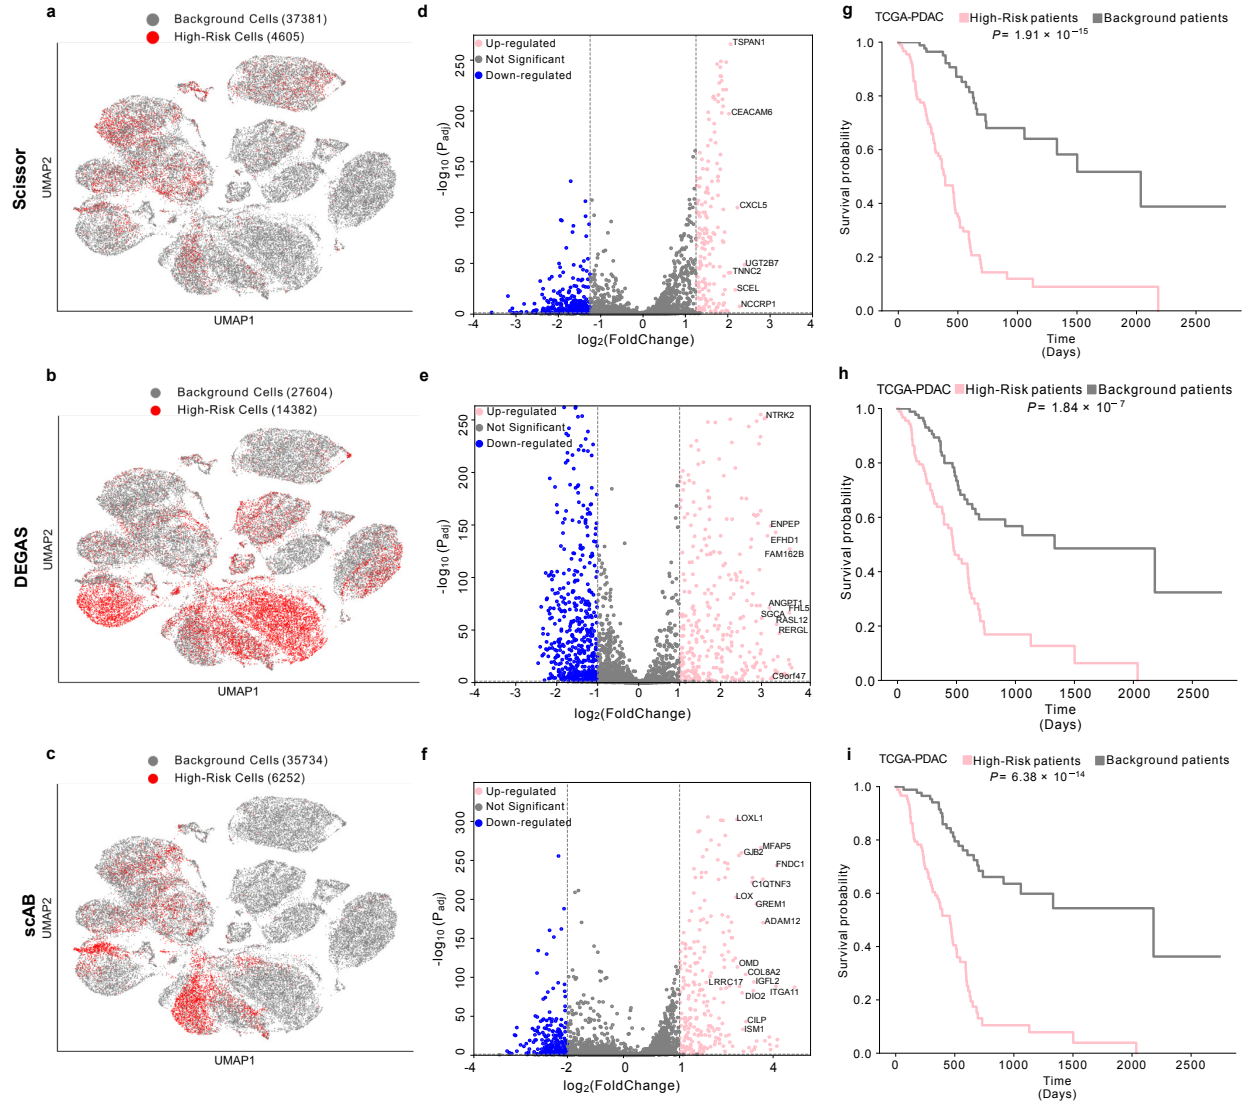

**Fig. S4: Overview of Existing Methods Results in the PDAC Dataset.** **a-c**, UMAP visualizations of High-Risk cells identified by Scissor (**a**), DEGAS (**b**), and scAB (**c**). For the Scissor method, cells classified as Scissor+ were considered High-Risk. For DEGAS, cells with a score above 0.5 were classified as High-Risk. For scAB, any cells not labeled as "Other" were classified as High-Risk. **d-f**, Volcano plots for Scissor (**d**), DEGAS (**e**), and scAB (**f**), highlighting upregulated and downregulated genes. **g-i**, Kaplan-Meier survival plots based on TCGA-PDAC patient data for Scissor (**g**), DEGAS (**h**), and scAB (**i**). Upregulated genes were used to stratify patients based on their expression levels. A broader separation between survival curves indicates better stratification between patients at a higher risk of death and those at a lower risk.  $P$  values were calculated using the log-rank test to compare survival curves between High-Risk and Background patient groups.

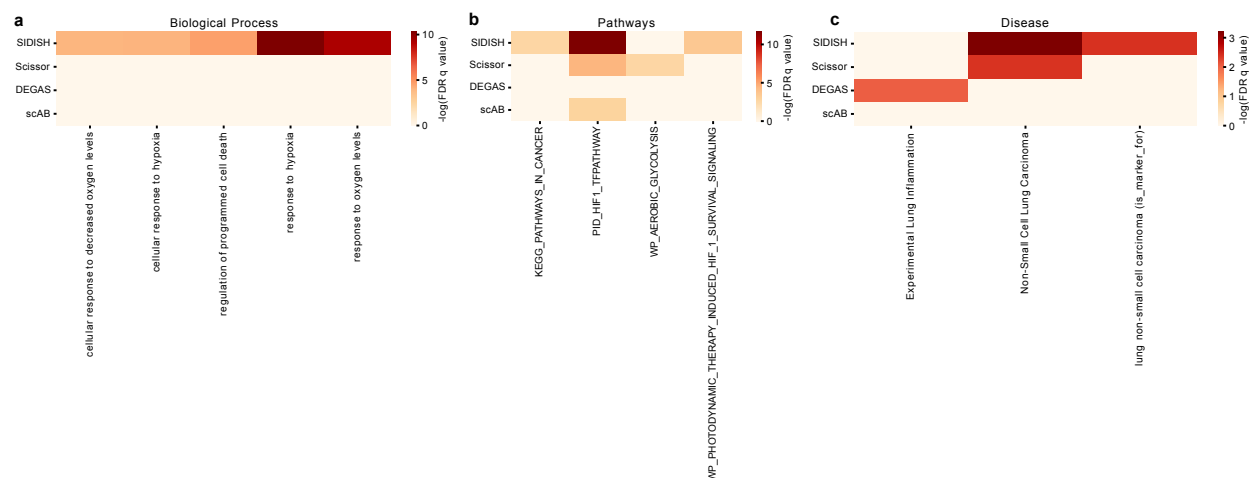

**Fig. S5: Enrichment Analysis benchmark between SIDISH, Scissor, DEGAS, and scAB in the LUAD scRNA-seq dataset.** **a**, GO enrichment analysis between all 4 methods, shows SIDISH marker genes being significantly more enriched than Scissor, DEGAS, and scAB. **b**, Pathway enrichment analysis between all 4 methods. **c**, Disease enrichment between all 4 methods.

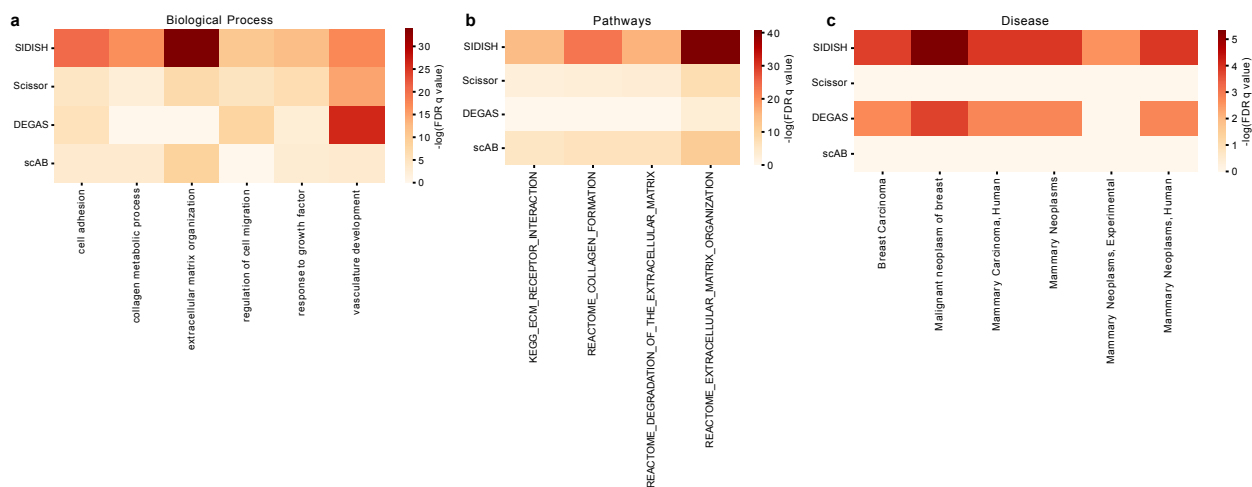

**Fig. S6: Enrichment Analysis Benchmark Between SIDISH, Scissor, DEGAS, and scAB in the BRCA scRNA-seq Dataset.** **a**, GO enrichment analysis comparing all four methods shows that SIDISH marker genes are significantly more enriched than those from Scissor, DEGAS, and scAB. **b**, Pathway enrichment analysis comparing all four methods. **c**, Disease enrichment analysis comparing all four methods.

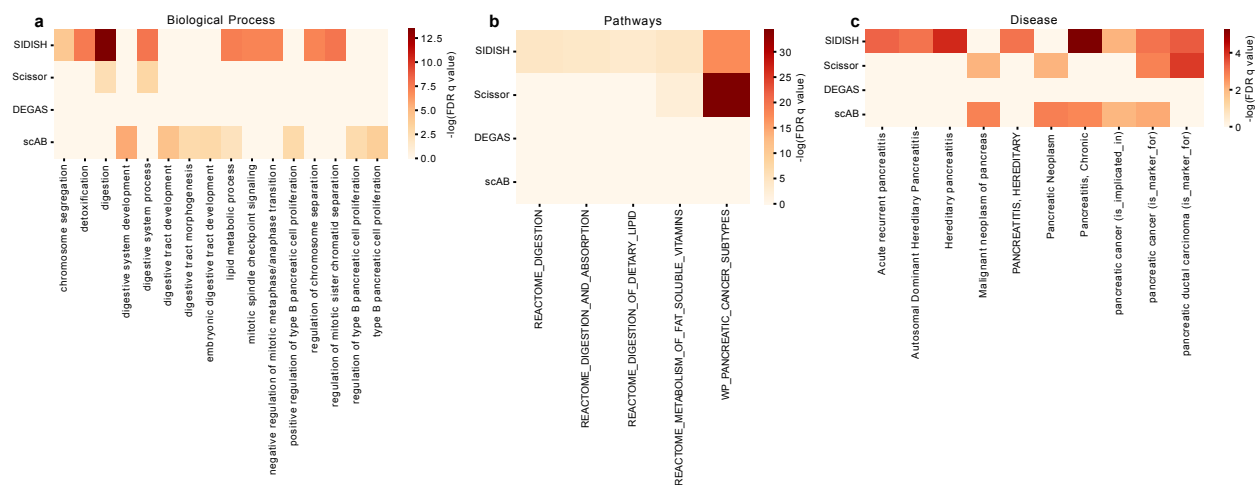

**Fig. S7: Enrichment Analysis Benchmark Between SIDISH, Scissor, DEGAS, and scAB in the PDAC scRNA-seq Dataset.** **a**, GO enrichment analysis comparing all four methods shows that SIDISH marker genes are significantly more enriched than those from Scissor, DEGAS, and scAB. **b**, Pathway enrichment analysis comparing all four methods. **c**, Disease enrichment analysis comparing all four methods.

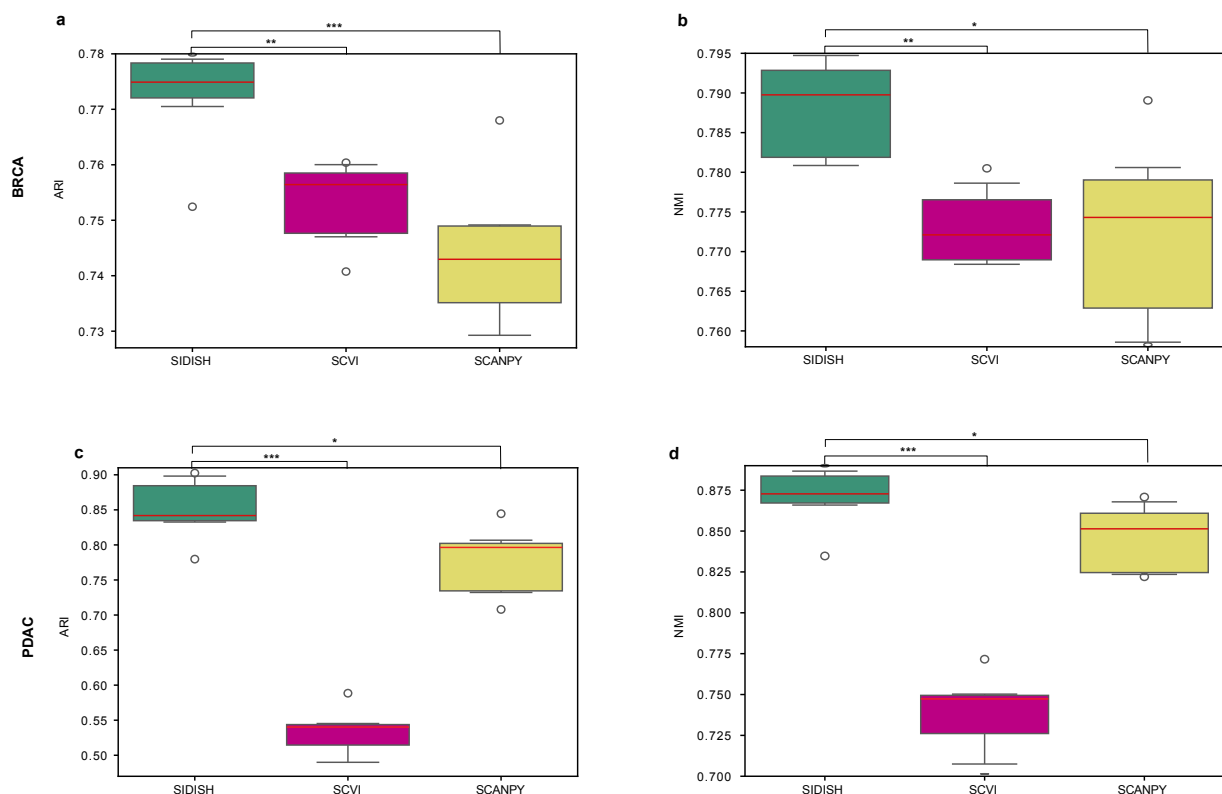

**Fig. S8: SIDISH Embeddings Achieve Superior Clustering Performance Compared to State-of-the-Art Tools.** **a-b**, Box plots demonstrate that SIDISH's embeddings achieve significantly better clustering performance than state-of-the-art tools such as Scanpy and SCVI in the BRCA dataset. SIDISH outperforms these tools in Adjusted Rand Index (ARI, **a**) and Normalized Mutual Information (NMI, **b**) metrics. **c-d**, In the PDAC dataset, SIDISH-derived embeddings also yield superior clustering performance compared to Scanpy and SCVI. Statistical significance was assessed using Mann-Whitney U tests: \* $P < 0.05$ , \*\* $P < 0.01$ , \*\*\* $P < 0.001$ , \*\*\*\* $P < 0.0001$ ; n.s., not significant.

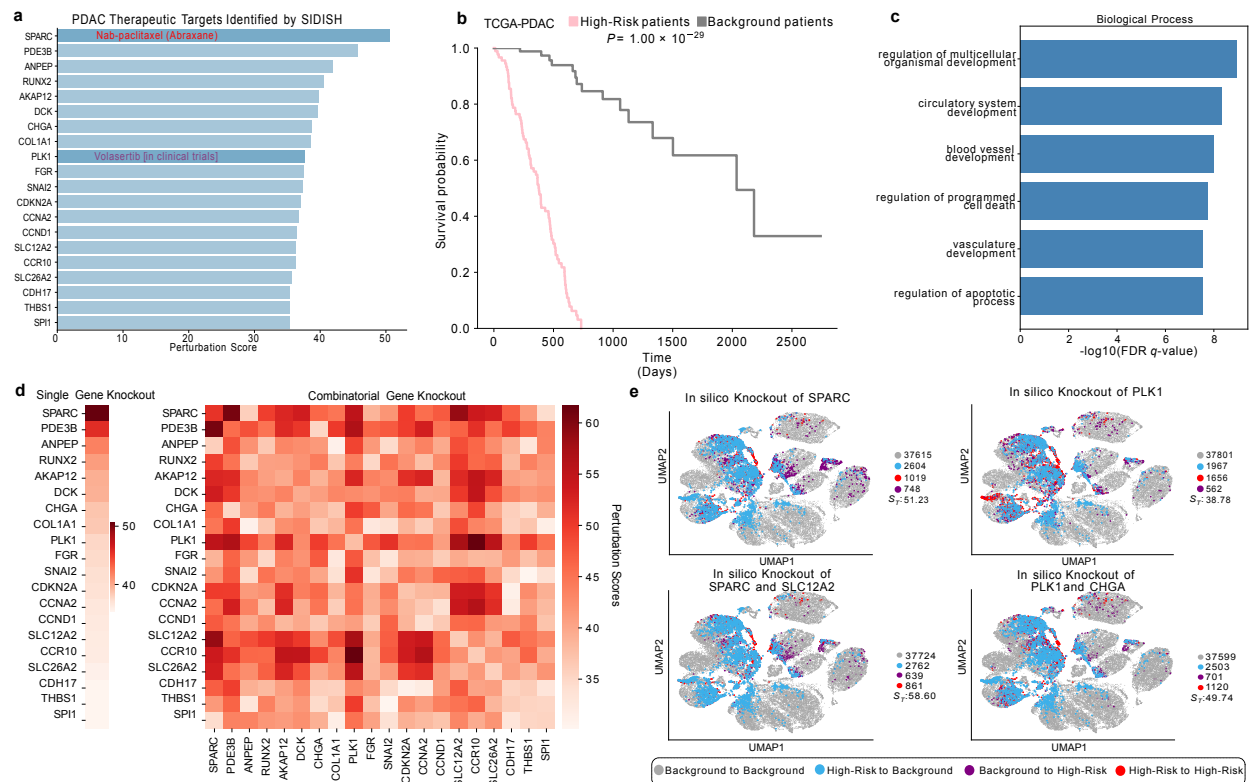

**Fig. S9: In silico Gene Perturbation with SIDISH Identifies Key Therapeutic Targets and Reduces High-Risk Cells in PDAC scRNA-seq Dataset.** **a**, Ranked bar plot of therapeutic targets identified by SIDISH in pancreatic ductal adenocarcinoma (PDAC) based on perturbation scores. Top-ranking genes, including *SPARC* and *PLK1*, exhibit the highest scores, highlighting their potential as therapeutic targets. An FDA-approved drug such as Nab-paclitaxel (red) is bound by *SPARC* facilitating drug delivery within the tumor, and a clinically relevant drug such as Volasertib (purple), targeting *PLK1* (currently in clinical trials for PDAC), is prominently featured, underscoring the therapeutic potential of SIDISHs in silico perturbation feature. **b**, Kaplan-Meier survival analysis of TCGA-PDAC patients demonstrates significantly poorer survival outcomes for High-Risk patients, characterized by higher expression of the top perturbed genes (pink), compared to Background patients with lower expression levels (gray) ( $P = 1 \times 10^{-29}$ ). The  $P$  value was calculated using the log-rank test to compare survival curves between High-Risk and Background patient groups. **c**, Gene Ontology (GO) enrichment analysis of the potential therapeutic candidate genes identified by SIDISH reveals significant enrichment in regulated processes associated with poor survival. **d**, Heatmaps of single-gene and combinatorial gene knockouts, ranked by perturbation scores. Single-gene knockouts, such as *SPARC* and *PLK1*, show substantial reductions in High-Risk cells, while combinatorial knockouts, including *SPARC* and *SLC12A2* and *PLK1* and *CHGA*, result in greater reductions in High-Risk cell subpopulations. **e**, UMAP visualizations illustrating the spatial effects of in-silico knockouts on High-Risk and Background cell subpopulations. Knockout of *SPARC* achieved perturbation scores ( $S_T$ ) of 51.23 and 38.78. Combinatorial knockouts, such as *SPARC* and *SLC12A2* (58.60) and *PLK1* and *CHGA* (49.74), achieve even greater scores. The UMAP color legend categorizes transitions: gray for unchanged Background cells (Background to Background), blue for High-Risk cells converting to Background (High-Risk to Background), purple for Background cells converting to High-Risk (Background to High-Risk), and red for persistent High-Risk cells (High-Risk to High-Risk).  $S_T$  represents the perturbation score.

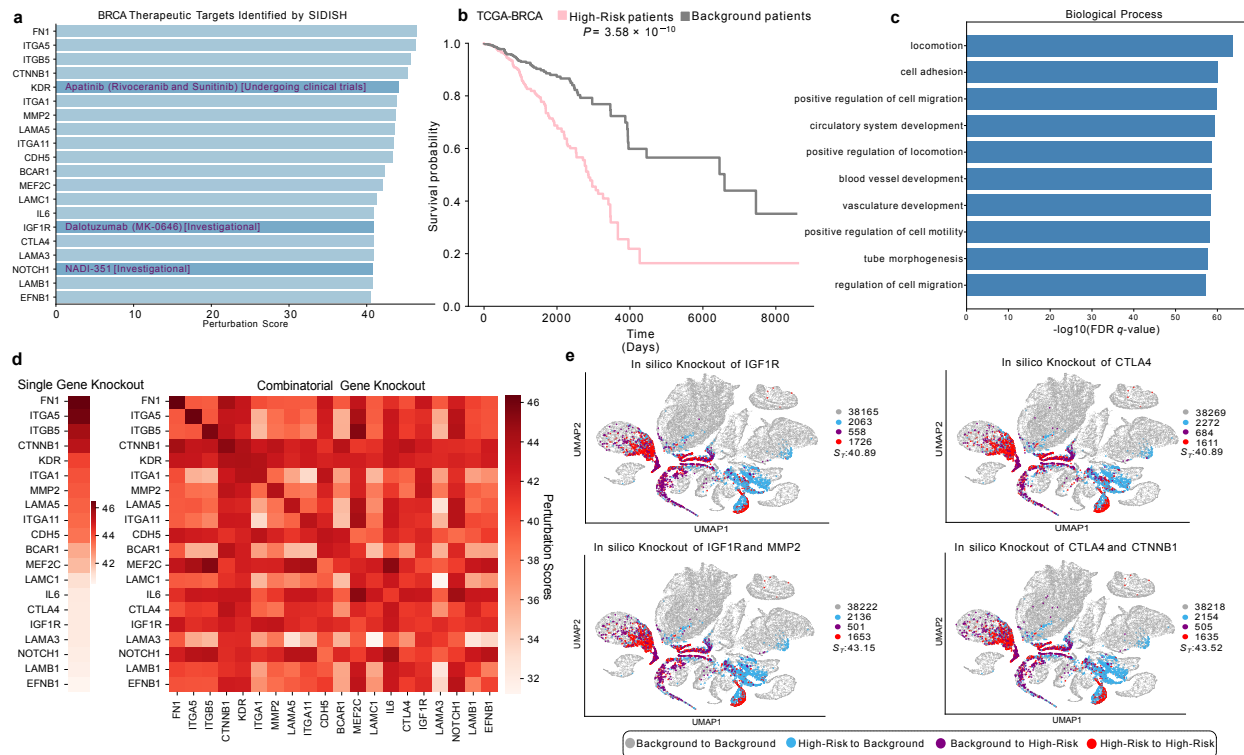

**Fig. S10: In silico Gene Perturbation with SIDISH Identifies Key Therapeutic Targets to Reduce High-Risk Cells in the BRCA scRNA-seq Dataset.** **a**, **a**, Ranked bar plot of therapeutic targets identified by SIDISH in BRCA based on perturbation scores. High-ranking genes, including *FN1*, *ITGA5*, and *ITGB5*, demonstrate strong potential as therapeutic targets. Clinically relevant drugs linked to SIDISH-identified targets include Apatinib (targeting *KDR*), Rivoceranib, and Sunitinib (targeting *KDR*), and investigational agents such as Atezolizumab (MK-0646, targeting *IGF1R*), and NADI-351 (targeting *NOTCH1*). These drugs are all being investigated for use in BRCA. **b**, Kaplan-Meier survival analysis of TCGA-BRCA patients demonstrates significantly poorer survival outcomes for High-Risk patients, characterized by higher expression of the top perturbed genes (pink), compared to Background patients with lower expression levels (gray) ( $P = 3.58 \times 10^{-10}$ ). The  $P$  value was calculated using the log-rank test to compare survival curves between High-Risk and Background patient groups. **c**, Gene Ontology (GO) analysis reveals biological processes that are critical to hindering cancer progression and therapeutic resistance. **d**, Heatmaps showing perturbation scores for single-gene and combinatorial gene knockouts. Single-gene knockouts, such as *IGF1R* and *CTLA4*, result in substantial reductions in High-Risk cells. Combinatorial knockouts, such as *IGF1R* and *MMP2* and *CTLA4* and *CTNNB1*, obtain an even greater reduction in High-Risk cell subpopulations compared to single-gene perturbations. **e**, UMAP visualizations illustrating the spatial effects of in-silico gene perturbations on High-Risk and Background cells. Knockouts of *IGF1R* and *CTLA4* achieve equal perturbation scores ( $S_T$ ) of 40.89%, respectively. Combinatorial knockouts, such as *IGF1R* and *MMP2* (43.15) and *CTLA4* and *CTNNB1* (43.52), achieve higher perturbation scores. The UMAP color legend categorizes transitions: gray for unchanged Background cells (Background to Background), blue for High-Risk cells converting to Background (High-Risk to Background), purple for Background cells converting to High-Risk (Background to High-Risk), and red for persistent High-Risk cells (High-Risk to High-Risk).  $S_T$  represents the perturbation score.

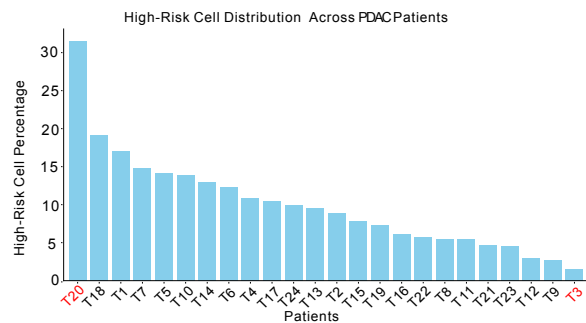

**Fig. S11: Comparison of proportions of High-Risk cells between patients in the PDAC scRNA-seq dataset.** Distribution of the proportion of High-Risk cells across patients ranked in decreasing order. Patient T20 has the highest amount of High-Risk cells among all PDAC patients. Patient T3 has the lowest.

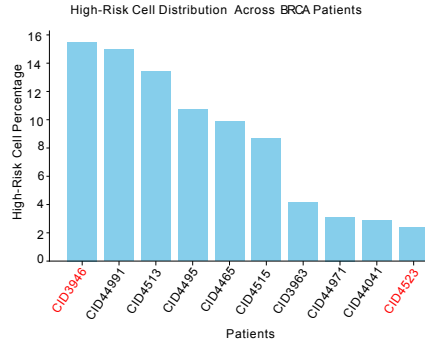

**Fig. S12: Comparison of proportions of High-Risk cells between patients in the BRCA (TNBC subset) scRNA-seq dataset. a,** Distribution of the proportion of High-Risk cells across patients, ranked in decreasing order. Patient CID3946 has the highest amount of High-Risk cells among all BRCA patients, while patient CID4523 has the lowest.

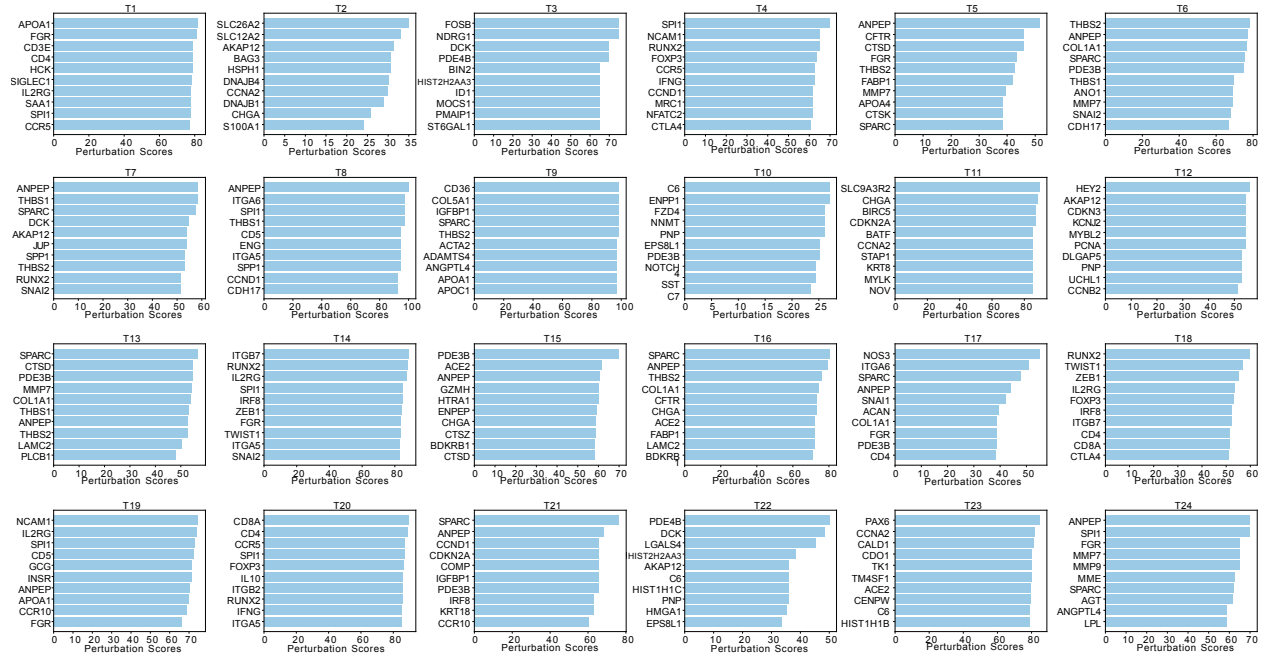

**Fig. S13: Top in silico perturbation targets identified by SIDISH for each patient in the PDAC scRNA-seq dataset.** Bar plots display the top 10 genes with the highest perturbation scores for each patient, highlighting key potential therapeutic candidates.

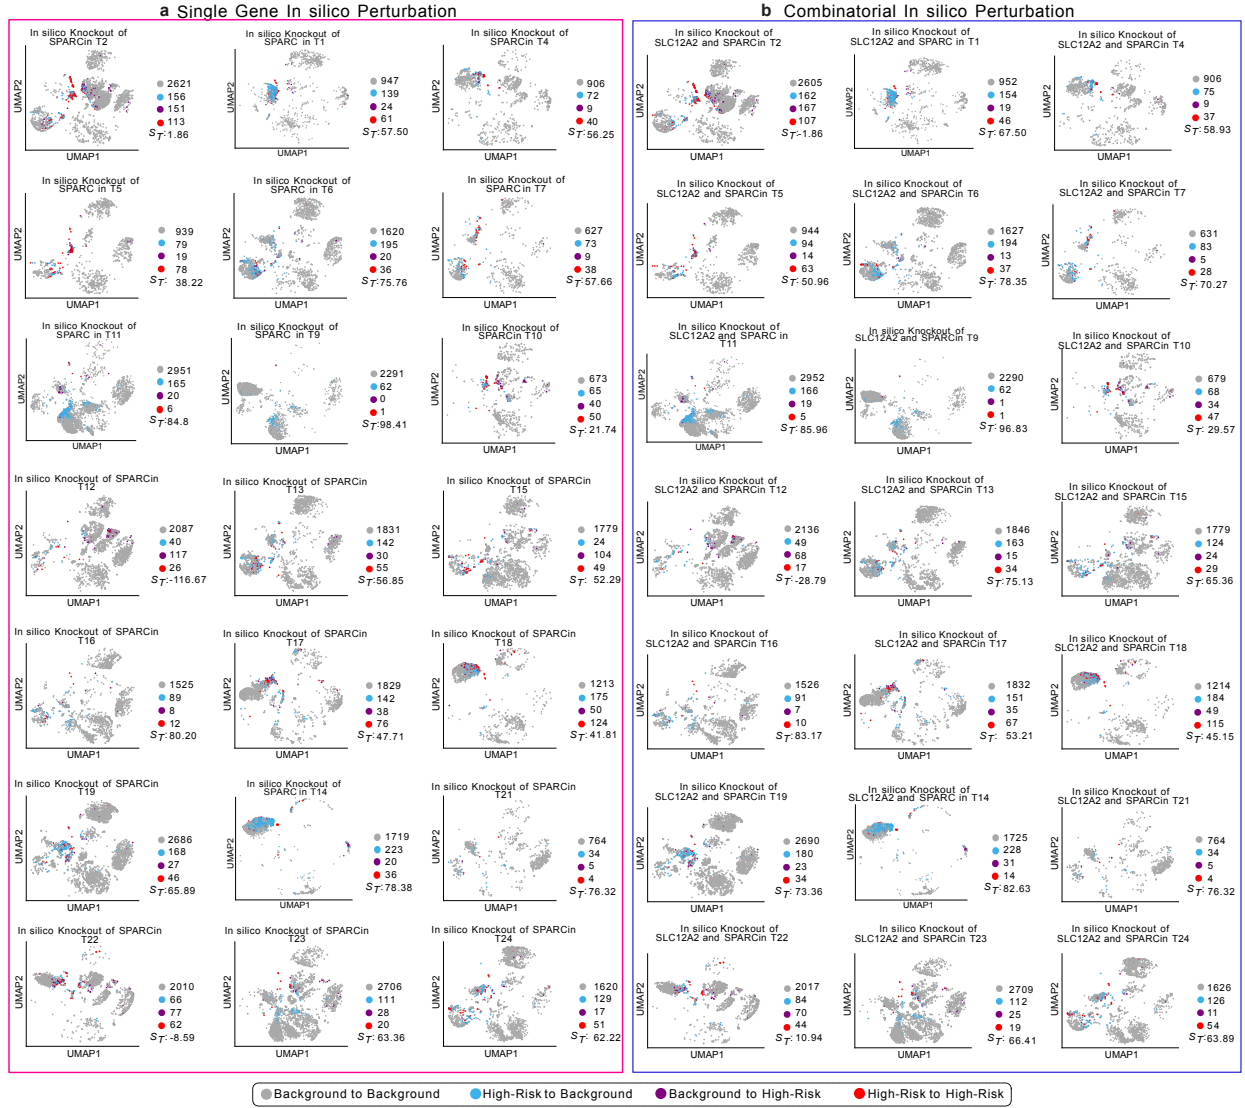

**Fig. S14: UMAP visualization of in silico single-gene knockout of SPARC and SLC12A2 in PDAC scRNA-seq patients.** The color legend in the UMAPs indicates: blue for High-Risk cells transitioned to Background cells (High-Risk to Background), red for persistent High-Risk cells (High-Risk to High-Risk), purple for Background cells transitioned to High-Risk cells (Background to High-Risk), and gray for unchanged Background cells (Background to Background).  $S_T$  represents the perturbation score.

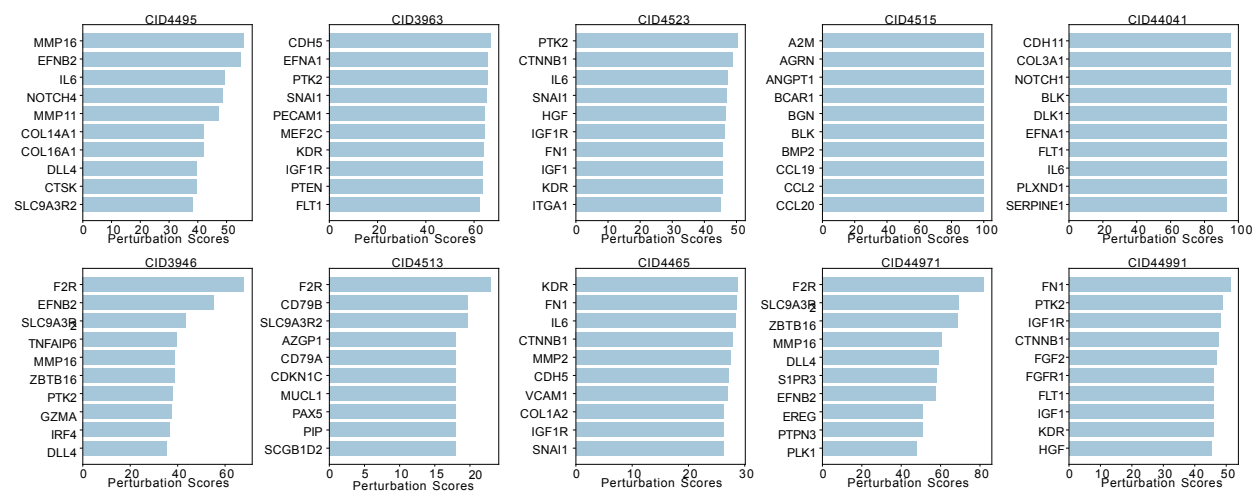

**Fig. S15: Top in silico perturbation targets identified by SIDISH for each patient in the BRCA scRNA-seq dataset.** Bar plots display the top 10 genes with the highest perturbation scores for each patient, highlighting key potential therapeutic candidates.

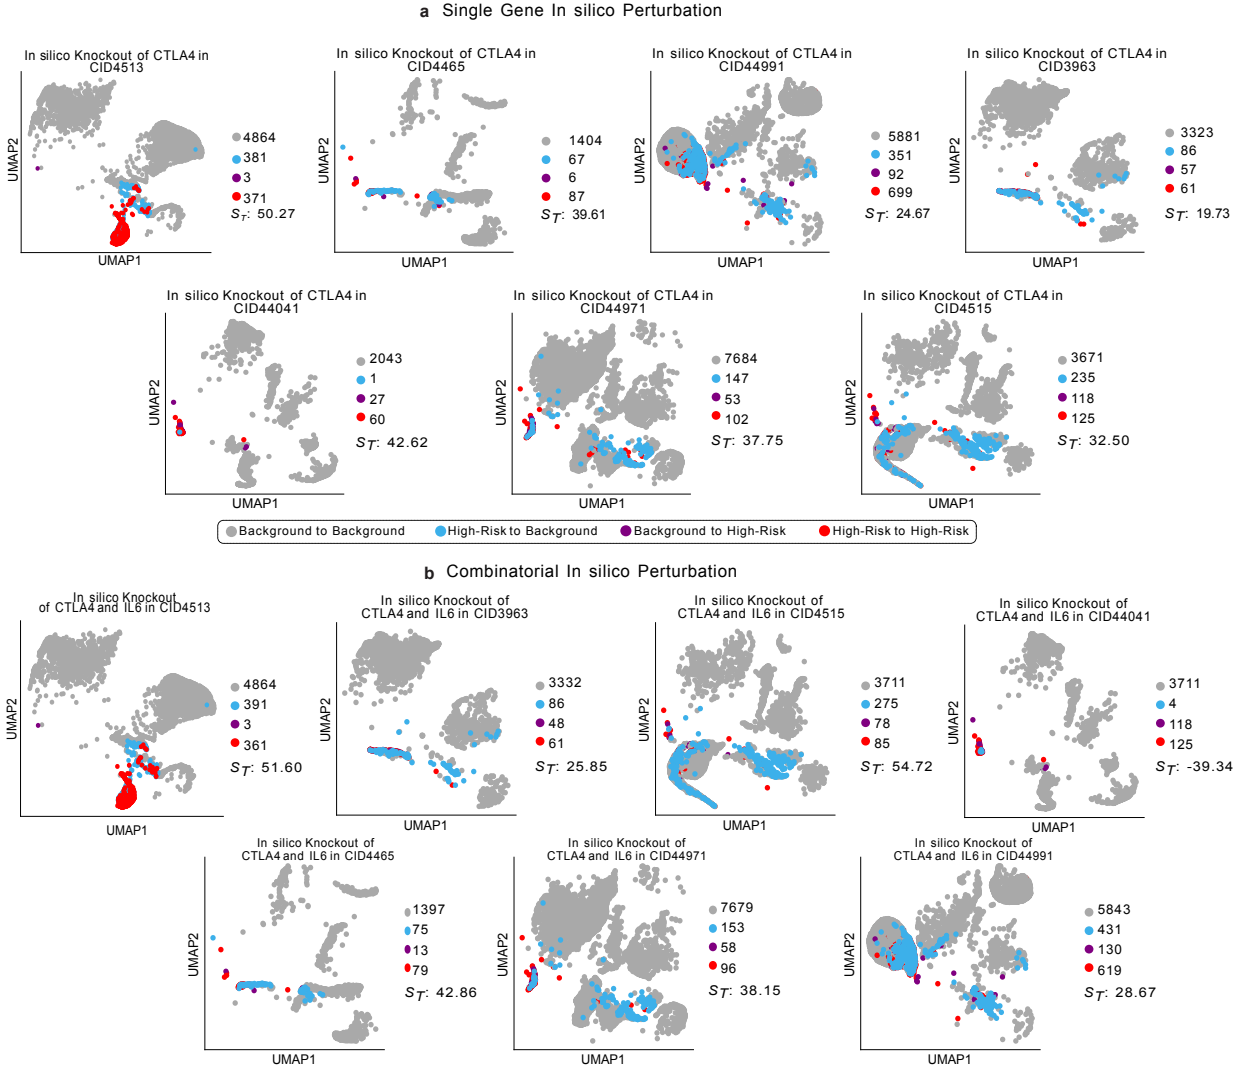

**Fig. S16: UMAP visualization of in silico single-gene knockout of CTLA4 and combinatorial gene knockout of CTLA4 and IL6 in BRCA scRNA-seq patients.** The color legend in the UMAPs indicates: blue for High-Risk cells transitioned to Background cells (High-Risk to Background), red for persistent High-Risk cells (High-Risk to High-Risk), purple for Background cells transitioned to High-Risk cells (Background to High-Risk), and gray for unchanged Background cells (Background to Background).  $S_T$  represents the perturbation score.

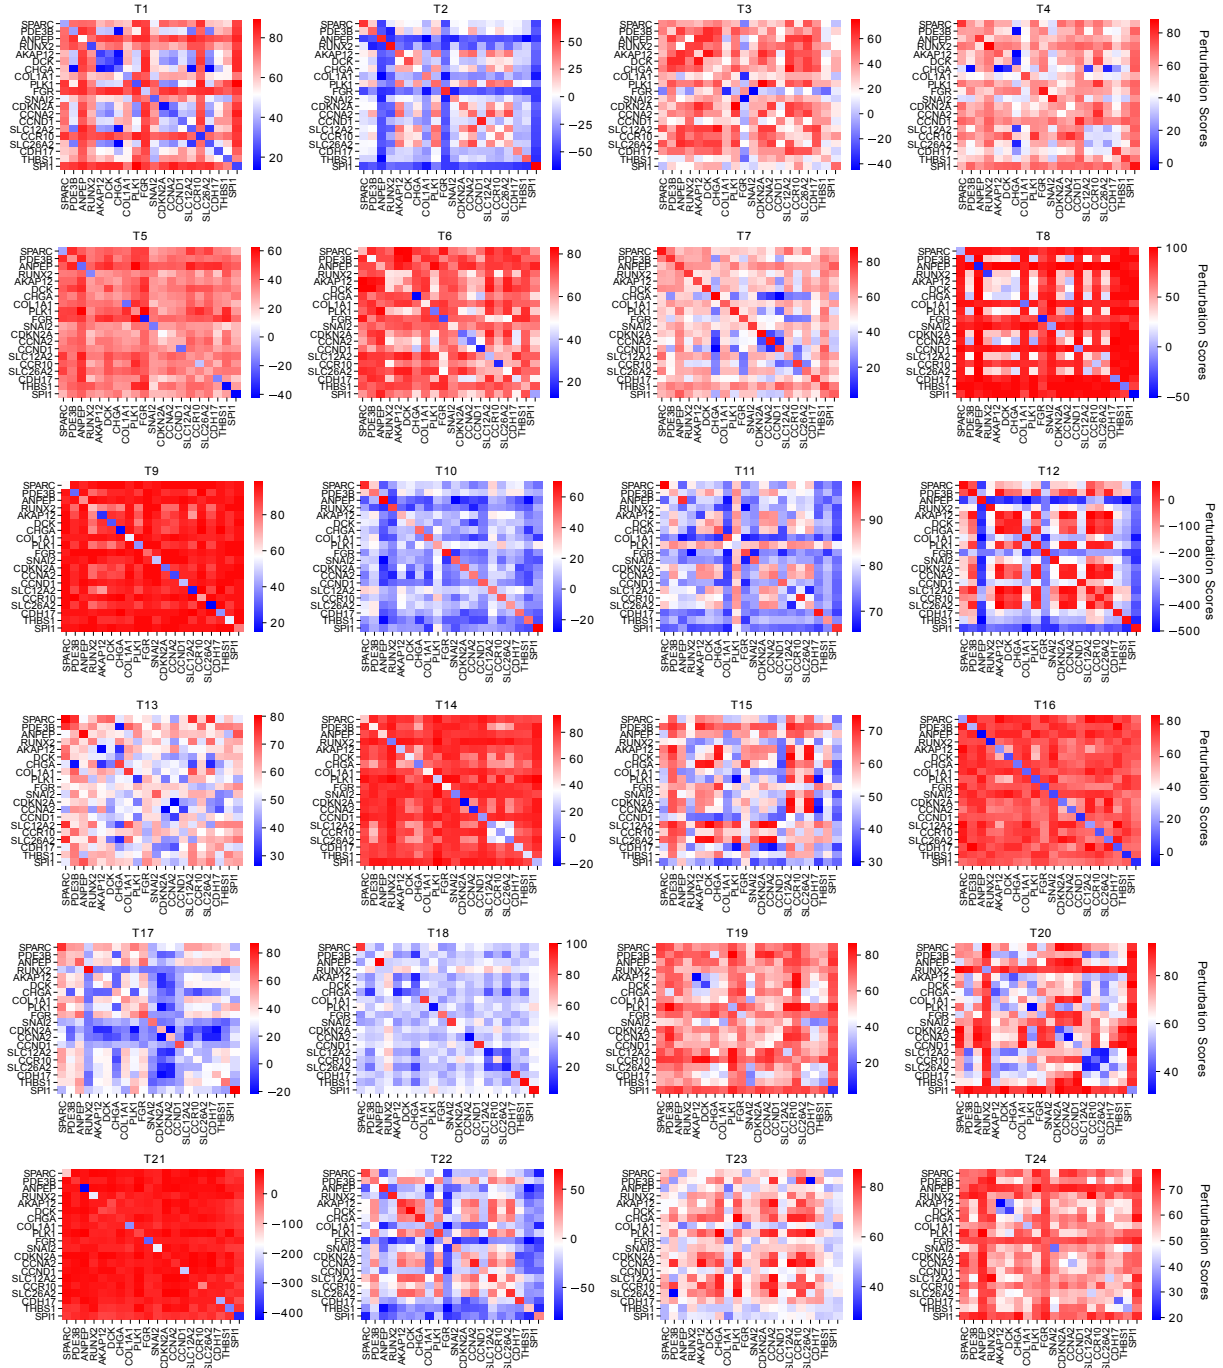

**Fig. S17: Heatmap of in silico combinatorial gene perturbation scores in PDAC scRNA-seq patients.** The heatmap displays perturbation scores for various knockout gene pairs. The same marker genes identified in the perturbation analysis of the entire PDAC scRNA-seq dataset were used for comparison purposes.

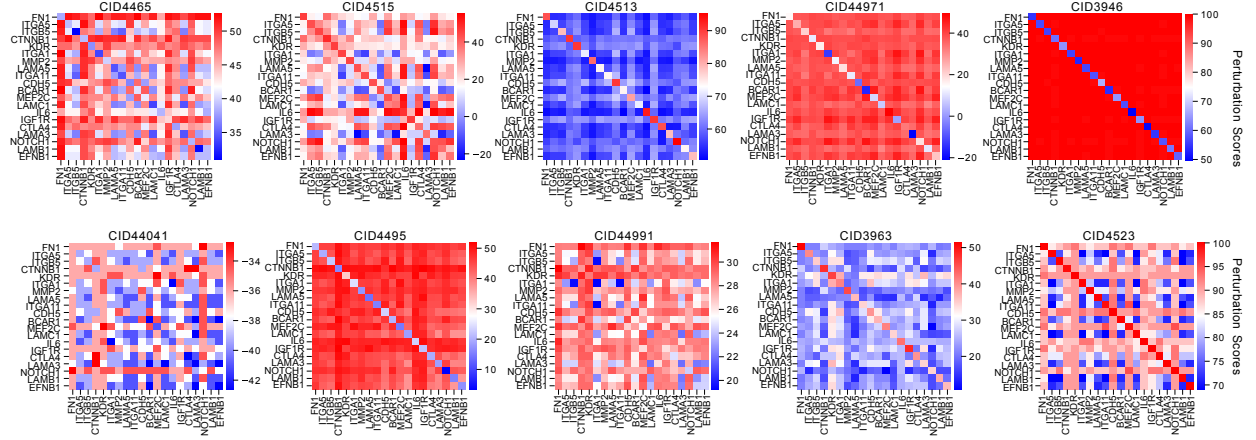

**Fig. S18: Heatmap of in silico combinatorial gene perturbation scores in BRCA scRNA-seq patients.** The heatmap displays perturbation scores for various knockout gene pairs. The same marker genes identified in the perturbation analysis of the entire BRCA scRNA-seq dataset were used for comparison purposes.

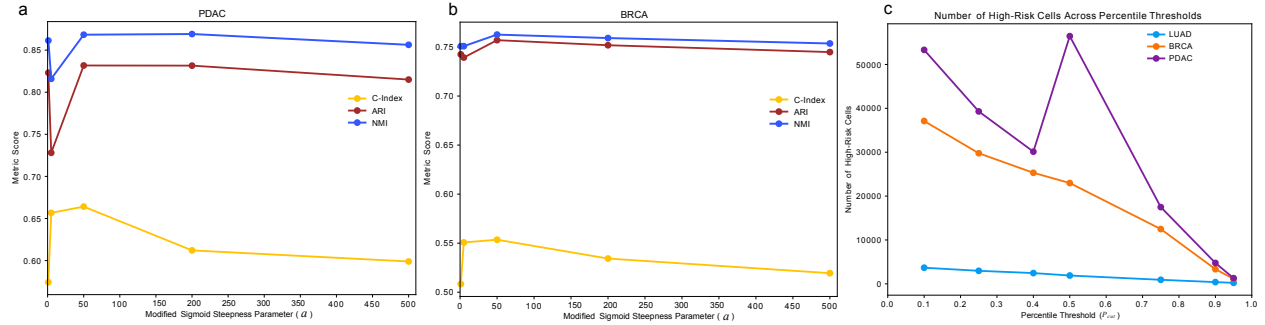

**Fig. S19: Effect of Hyperparameters Sigmoid Steepness ( $a$ ) and Weibull Distribution Percentile ( $P_{cut}$ ) on Model Performance and High-Risk Cell Identification.** a-b, Plots showing the relationship between the sigmoid steepness hyperparameter ( $a$ ) and performance metrics—C-Index (yellow), Adjusted Rand Index (ARI, red), and Normalized Mutual Information (NMI, blue)—highlighting its impact on SIDISH when trained on the PDAC dataset (a) and the BRCA dataset (b). Variations in  $a$  demonstrate its influence on model performance across datasets. c, Plot illustrating the effect of the Weibull distribution percentile hyperparameter ( $P_{cut}$ ) on the number of High-Risk cells identified by SIDISH. As  $P_{cut}$  increases, the number of cells classified as High-Risk decreases, indicating a thresholding effect on cell selection.

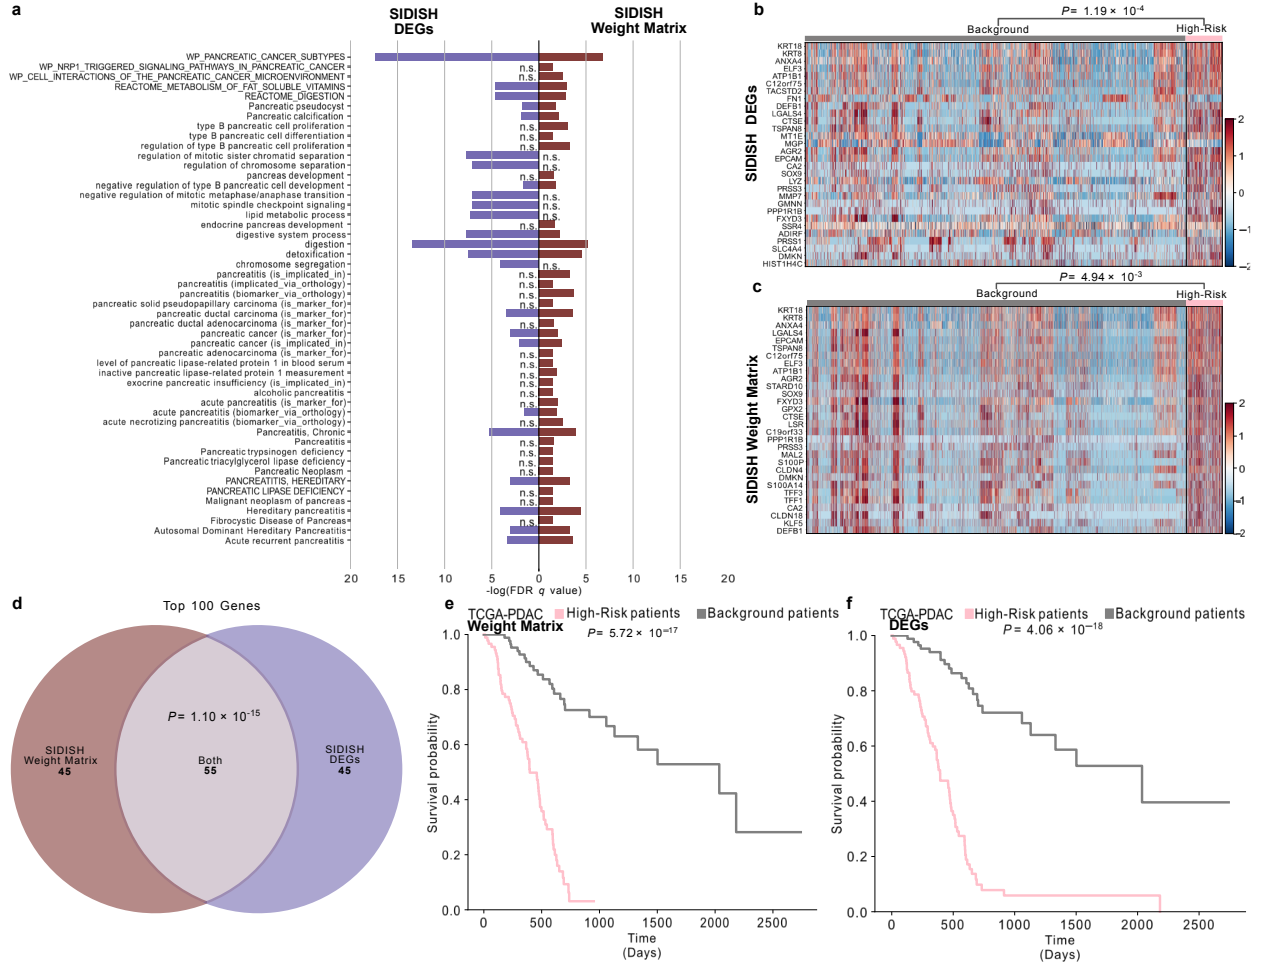

**Fig. S20: Comparison between marker genes derived from SIDISH's weight matrix and differential gene expression (DEG) analysis in the PDAC scRNA-seq dataset.** **a**, Diverging bar plot comparing the enrichment analysis of marker genes derived from DEG analysis (purple) and SIDISH's weight matrix (burgundy). The scale on the x-axis is the  $-\log(\text{FDR } q\text{-value})$ , highlighting the biological relevance of both methods. **b**, Heatmap showing the expression of marker genes derived from DEG analysis in Background and High-Risk cells. A higher concentration of red in one group indicates greater gene expression, while blue indicates lower expression. **c**, Heatmap showing the expression of marker genes derived from SIDISH's weight matrix in Background and High-Risk cells. Color intensity reflects expression levels as in panel **b**. **d**, Venn diagram illustrating the overlap between marker genes identified through DEG analysis in purple and SIDISH's weight matrix in burgundy ( $P = 1.10 \times 10^{-15}$ ). The  $P$  value assessing the statistical significance of this overlap was calculated using a hypergeometric test. **e-f**, Kaplan-Meier survival plots based on TCGA-PDAC patient data, stratified by expression levels of marker genes from DEG analysis (**e**) and SIDISH's weight matrix (**f**). A broader separation between survival curves indicates better stratification between patients at a higher risk of death and those at a lower risk.  $P$  values were calculated using the log-rank test to compare survival curves between High-Risk and Background patient groups.

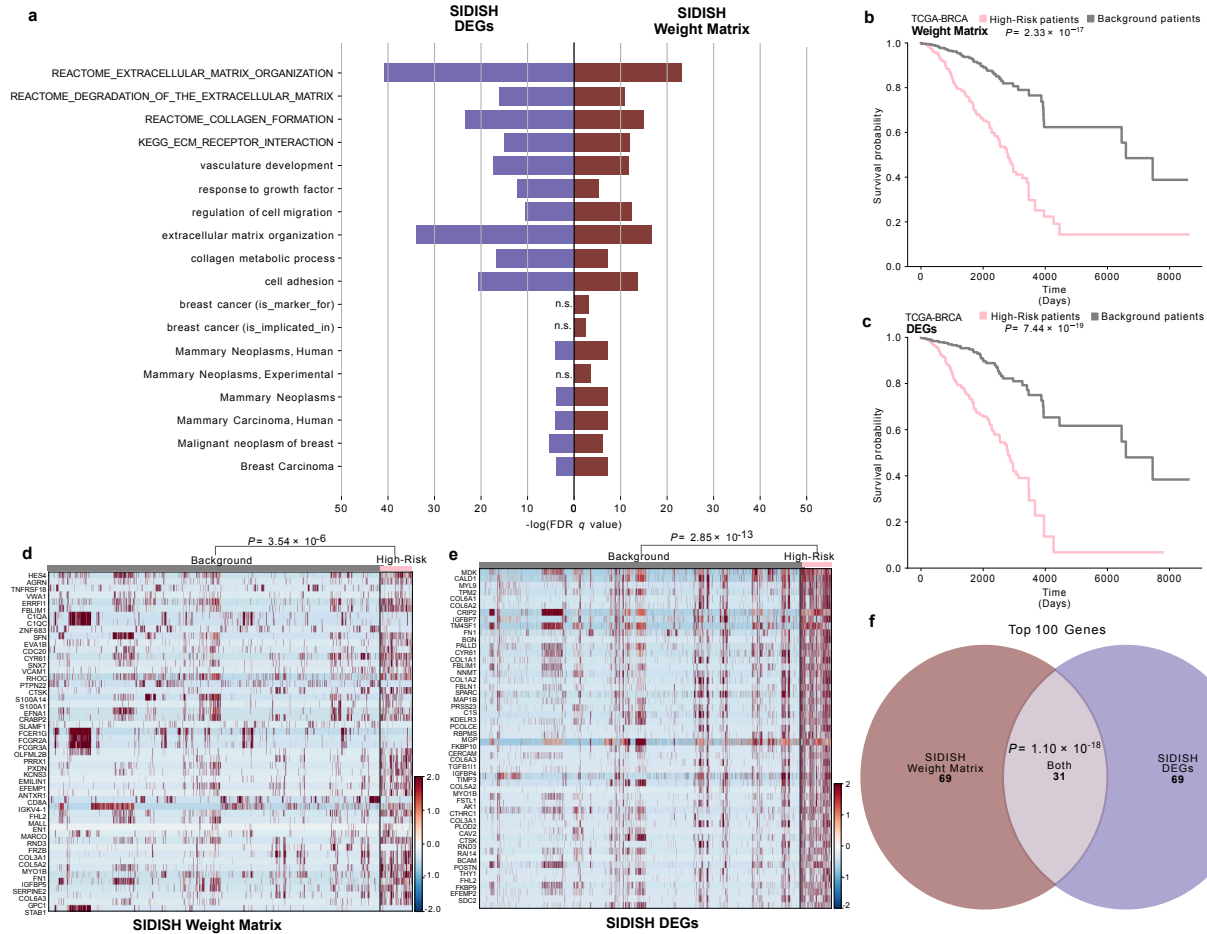

**Fig. S21: Comparison between marker genes derived from SIDISH's weight matrix and differential gene expression (DEG) analysis in the BRCA scRNA-seq dataset.** **a**, Diverging bar plot comparing the enrichment analysis of marker genes derived from DEG analysis (purple) and those obtained from SIDISH's weight matrix (burgundy). The scale on the x-axis is the  $-\log(\text{FDR } q\text{-value})$ , highlighting the biological relevance of both methods. **b-c**, Kaplan-Meier survival plots based on TCGA-BRCA patient data, stratified by expression levels of marker genes from SIDISH's weight matrix (**b**) and DEG analysis (**c**). Broader separation between survival curves indicates better stratification of patients into High-Risk and Background groups.  $P$  values were calculated using the log-rank test to assess the significance of survival differences. **d**, Heatmap showing the expression of marker genes derived from SIDISH's weight matrix in Background and High-Risk cells. A higher concentration of red in one group indicates greater gene expression, while blue indicates lower expression. **e**, Heatmap showing the expression of marker genes derived from DEG analysis in Background and High-Risk cells, with color intensity reflecting expression levels as in panel **d**. **f**, Venn diagram illustrating the overlap between marker genes identified through DEG analysis in purple and SIDISH's weight matrix in burgundy ( $P = 1.10 \times 10^{-18}$ ). The  $P$  value assessing the statistical significance of this overlap was calculated using a hypergeometric test.

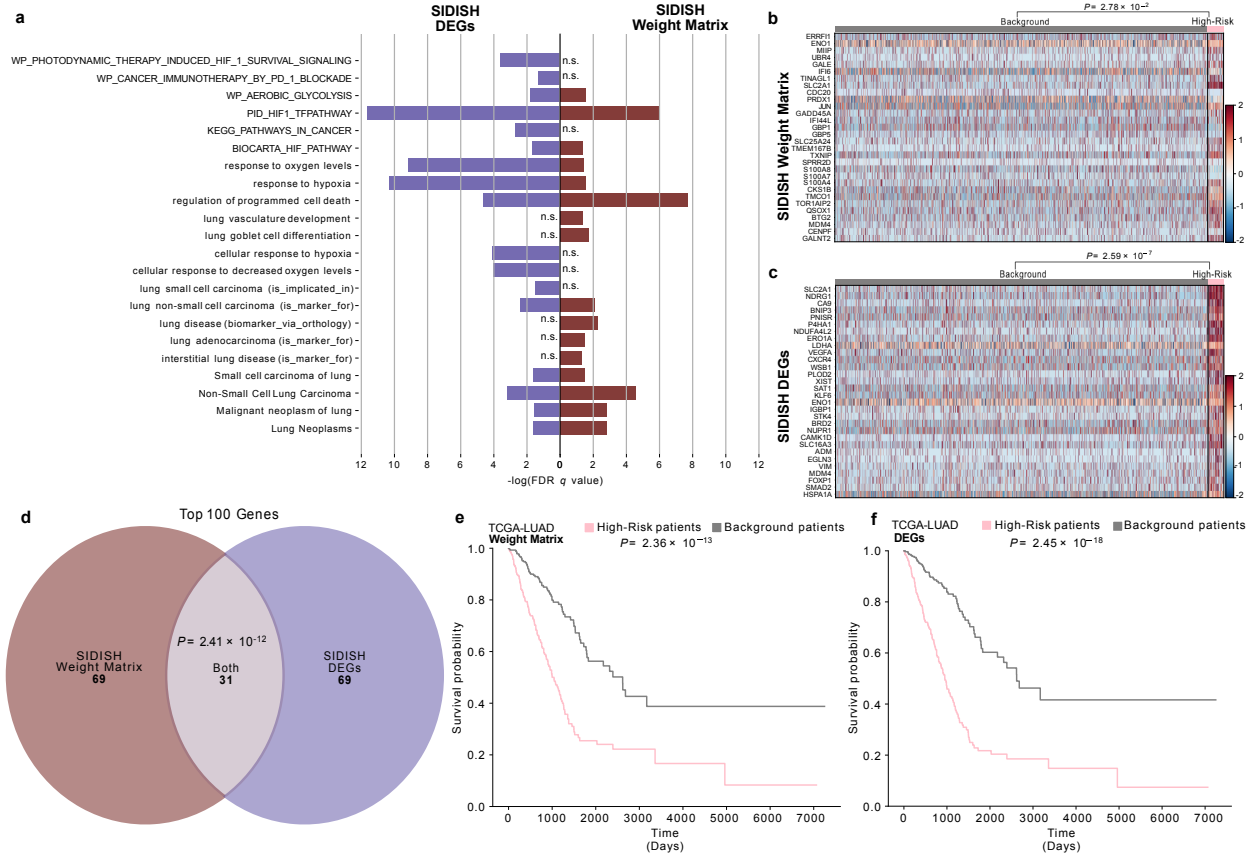

**Fig. S22: Comparison between marker genes derived from SIDISH's weight matrix and differential gene expression (DEG) analysis in the LUAD scRNA-seq dataset.** **a**, Diverging bar plot comparing the enrichment analysis of marker genes derived from DEG analysis (purple) and those obtained from SIDISH's weight matrix (burgundy). The scale on the x-axis is the  $-\log(\text{FDR } q\text{-value})$ , highlighting the biological relevance of both methods. **b-c**, Kaplan-Meier survival plots based on TCGA-LUAD patient data, stratified by expression levels of marker genes from SIDISH's weight matrix (**b**) and DEG analysis (**c**). Broader separation between survival curves indicates better stratification of patients into High-Risk and Background groups.  $P$  values were calculated using the log-rank test to assess the significance of survival differences. **d**, Heatmap showing the expression of marker genes derived from SIDISH's weight matrix in Background and High-Risk cells. A higher concentration of red in one group indicates greater gene expression, while blue indicates lower expression. **e**, Heatmap showing the expression of marker genes derived from DEG analysis in Background and High-Risk cells, with color intensity reflecting expression levels as in panel **d**. **f**, Venn diagram illustrating the overlap between marker genes identified through DEG analysis in purple and SIDISH's weight matrix in burgundy ( $P = 2.41 \times 10^{-12}$ ). The  $P$  value assessing the statistical significance of this overlap was calculated using a hypergeometric tests.
