# Supplementary material for: SIDISH Identifies High-Risk Disease-Associated Cells and Biomarkers by Integrating Single-Cell Depth and Bulk Breadth
Source: Research Square preprint supplement (doi:10.21203/rs.3.rs-5921999/v1), 2025-03-10
Supplement: Supplementary file 2 [file 2da6e43f519f0973e0e9ae88.xlsx]

## Sheet: Description
Description:
1. Scissor Cell Labels: Full list of LUAD cells and their associated labels predicted by Scissor for benchmarking purposes. Scissor+ cells were classified as High-Risk cells, while the remaining cells, including Scissor- cells, were labeled as Background cells.
2. DEGAS Cell labels: Full list of LUAD cells and their associated labels predicted byDEGAS for benchmarking purposes. Predicted score > 0.5 were classified as High-Risk cells, while the remaining cells were labeled as Background cells.
3. scAB Cell labels: Full list of LUAD cells and their associated labels predicted by scAB for benchmarking purposes. "scAB+" cells were classified as High-Risk cells, while the cells labelled as "Other cells" were labeled as Background cells.
4. Scissor Differential Genes: All the differentially expressed genes between High-Risk cells and Background cells (Scissor derived) with an adjusted P value < 0.05. The log Fold change was calculated using a two-tailed Wilcoxon rank sum test
5. Scissor Differential Genes: All the differentially expressed genes between High-Risk cells and Background cells (DEGAS derived) with an adjusted P value < 0.05. The log Fold change was calculated using a two-tailed Wilcoxon rank sum test
6. Scissor Differential Genes: All the differentially expressed genes between High-Risk cells and Background cells (scAB derived) with an adjusted P value < 0.05. The log Fold change was calculated using a two-tailed Wilcoxon rank sum test

## Sheet: 1. Scissor Cell Labels
Cell	Label
AAACCTGAGACTACAA_15	Background
AAACCTGAGACTTGAA_20	Background
AAACCTGAGCGCCTTG_15	Background
AAACCTGCAGCTATTG_19	Background
AAACCTGCAGTAAGCG_15	Background
AAACCTGGTGGCGAAT_20	Background
AAACCTGTCACCGGGT_20	Background
AAACGGGAGCAGACTG_19	Background
AAACGGGAGTCCATAC_19	Background
AAACGGGAGTGCCATT_14	Background
AAACGGGCACTGCCAG_15	Background
AAACGGGGTACGACCC_19	Background
AAACGGGGTATATGGA_19	Background
AAACGGGTCACATACG_19	Background
AAACGGGTCTCGCTTG_14	Background
AAACGGGTCTGCTGTC_20	Background
AAAGATGAGACTGGGT_19	Background
AAAGATGAGTGGGATC_19	Background
AAAGATGCACAGGCCT_19	Background
AAAGATGGTTTGTTGG_20	Background
AAAGCAAAGCTGTCTA_19	Background
AAAGCAAAGGCTCATT_19	Background
AAAGCAACACCACCAG_16	Background
AAAGCAACATCGGGTC_15	Background
AAAGCAACATCGGTTA_20	Background
AAAGCAAGTACATGTC_20	Background
AAAGCAAGTTCGAATC_14	Background
AAAGCAATCAACGAAA_15	Background
AAAGTAGAGAATTGTG_20	Background
AAAGTAGAGGAGCGAG_19	High-Risk
AAAGTAGAGTCAAGCG_20	Background
AAAGTAGAGTCCATAC_14	Background
AAAGTAGAGTCCATAC_15	Background
AAAGTAGCAACTGCTA_18	Background
AAAGTAGCAAGCCTAT_19	Background
AAAGTAGGTAAGTTCC_20	Background
AAAGTAGGTCTAAACC_19	Background
AAAGTAGGTGTATGGG_18	Background
AAAGTAGTCATACGGT_18	Background
AAAGTAGTCCACGACG_19	Background
AAAGTAGTCCCTAATT_14	Background
AAATGCCAGGACATTA_20	Background
AAATGCCCAAATACAG_15	Background
AAATGCCCACGTCAGC_13	Background
AAATGCCGTAGTAGTA_15	Background
AAATGCCGTTGGAGGT_18	Background
AAATGCCTCAACGGGA_19	Background
AAATGCCTCAGTGTTG_18	Background
AAATGCCTCATATCGG_20	Background
AAATGCCTCCCGACTT_19	Background
AAATGCCTCCCTGACT_20	Background
AACACGTAGCTGAAAT_20	Background
AACACGTAGTAGGTGC_14	Background
AACACGTCAACGCACC_19	Background
AACACGTCACATGGGA_15	Background
AACACGTCACGTCAGC_20	Background
AACACGTCAGTATAAG_14	Background
AACACGTGTACAGTTC_20	Background
AACACGTGTCCGTGAC_19	Background
AACACGTGTCTAACGT_19	Background
AACACGTGTGATAAAC_15	Background
AACACGTTCAGCAACT_18	Background
AACACGTTCGTACCGG_15	Background
AACACGTTCTCGTTTA_15	Background
AACCATGCATCTCCCA_19	High-Risk
AACCATGTCACGATGT_13	Background
AACCATGTCACGATGT_14	Background
AACCATGTCTTAGCCC_14	Background
AACCATGTCTTAGCCC_15	Background
AACCGCGAGCTGCGAA_20	High-Risk
AACCGCGAGGACTGGT_18	Background
AACCGCGGTACCGTAT_15	Background
AACCGCGGTGACGGTA_14	Background
AACCGCGTCCTCGCAT_19	Background
AACGTTGAGACGACGT_20	Background
AACGTTGAGATATACG_19	Background
AACGTTGAGCTTCGCG_19	Background
AACGTTGAGTATGACA_19	Background
AACGTTGAGTGTGAAT_19	Background
AACGTTGAGTTGAGAT_20	Background
AACGTTGCAACCGCCA_19	Background
AACGTTGCAAGCCCAC_14	Background
AACGTTGCAAGCCCAC_16	Background
AACGTTGCAAGGTTTC_20	Background
AACGTTGCAATGTAAG_18	Background
AACGTTGCATTGGTAC_20	Background
AACGTTGTCGAATCCA_20	Background
AACTCAGAGAGTTGGC_20	Background
AACTCAGAGCAGACTG_13	Background
AACTCAGAGCAGACTG_14	Background
AACTCAGAGGGTGTTG_13	Background
AACTCAGCAAGGTTTC_15	Background
AACTCAGCACGAAACG_20	Background
AACTCAGCATGGTTGT_19	Background
AACTCAGCATTCGACA_13	Background
AACTCAGGTGGTCCGT_20	Background
AACTCAGGTTCGGCAC_19	Background
AACTCAGGTTCGTCTC_13	Background
AACTCAGGTTCGTCTC_14	Background
AACTCAGTCAGGATCT_13	Background
AACTCAGTCCGCGGTA_19	High-Risk
AACTCAGTCGAACTGT_16	Background
AACTCAGTCGGTCCGA_18	Background
AACTCCCAGCGCCTTG_19	High-Risk
AACTCCCAGCTAGTCT_14	Background
AACTCCCAGCTCCCAG_14	Background
AACTCCCAGGGTATCG_19	Background
AACTCCCCACCCAGTG_15	Background
AACTCCCCATATACCG_15	Background
AACTCCCGTAATAGCA_20	Background
AACTCCCGTAGCGCAA_20	Background
AACTCCCGTCAACTGT_20	Background
AACTCCCGTCAGGACA_19	Background
AACTCCCTCCAGGGCT_20	Background
AACTCCCTCTCTTATG_15	Background
AACTCCCTCTGGTGTA_14	Background
AACTCTTAGAAACCGC_15	Background
AACTCTTAGAAACCGC_16	Background
AACTCTTCACACCGAC_18	Background
AACTCTTCATAACCTG_20	Background
AACTCTTGTCCAGTGC_19	Background
AACTCTTTCATAGCAC_18	Background
AACTCTTTCGAACTGT_20	Background
AACTGGTAGCGTCTAT_20	Background
AACTGGTAGGTGCAAC_20	Background
AACTGGTAGTAGATGT_19	High-Risk
AACTGGTAGTAGGCCA_20	Background
AACTGGTCATTGGTAC_19	Background
AACTGGTGTCAGTGGA_15	Background
AACTGGTTCACATACG_19	Background
AACTGGTTCGGAGCAA_14	Background
AACTTTCAGCTAACAA_19	Background
AACTTTCAGTGGACGT_20	Background
AACTTTCTCCTAGAAC_20	Background
AACTTTCTCTTGTATC_15	Background
AAGACCTAGCGTTGCC_19	Background
AAGACCTAGCTGCAAG_20	Background
AAGACCTCACCCTATC_20	Background
AAGACCTTCAAAGACA_20	Background
AAGACCTTCGCAGGCT_13	Background
AAGACCTTCGCAGGCT_14	Background
AAGACCTTCTGAGTGT_14	Background
AAGCCGCAGTTTAGGA_20	High-Risk
AAGCCGCCACTTAAGC_20	Background
AAGCCGCGTTGGTAAA_14	Background
AAGCCGCGTTGTGGCC_13	Background
AAGCCGCGTTGTGGCC_14	Background
AAGCCGCTCCACGTTC_19	Background
AAGCCGCTCCGCGTTT_19	Background
AAGCCGCTCGCGCCAA_19	Background
AAGCCGCTCTGCGGCA_20	Background
AAGGAGCCAATGGACG_19	Background
AAGGAGCGTCAGCTAT_13	Background
AAGGAGCGTCCTAGCG_20	Background
AAGGAGCGTTAAGATG_19	High-Risk
AAGGAGCGTTATCGGT_13	Background
AAGGAGCGTTATCGGT_14	Background
AAGGAGCTCACGCGGT_19	Background
AAGGAGCTCAGCTTAG_15	Background
AAGGAGCTCGGTTCGG_14	Background
AAGGAGCTCTACCTGC_20	Background
AAGGCAGAGGGTATCG_15	Background
AAGGCAGAGTACGCGA_20	Background
AAGGCAGCATGCCTAA_20	Background
AAGGCAGCATGGTTGT_19	Background
AAGGCAGGTCCAACTA_20	Background
AAGGCAGGTGCTGTAT_20	Background
AAGGCAGGTGGTACAG_15	Background
AAGGCAGGTTATGTGC_20	Background
AAGGCAGTCAACACCA_16	Background
AAGGTTCAGCTAGTTC_13	High-Risk
AAGGTTCCACAGACAG_20	Background
AAGGTTCCACAGAGGT_19	Background
AAGGTTCCACGGTAAG_20	Background
AAGGTTCGTCCGAGTC_20	Background
AAGGTTCGTGAGCGAT_19	Background
AAGTCTGAGAGGACGG_20	Background
AAGTCTGAGATATGGT_20	Background
AAGTCTGAGCTAGTTC_15	Background
AAGTCTGAGGTAGCCA_19	High-Risk
AAGTCTGCACGAGAGT_13	Background
AAGTCTGCAGTCCTTC_20	Background
AAGTCTGCATAGGATA_19	Background
AAGTCTGTCCCGGATG_13	Background
AAGTCTGTCCCGGATG_14	Background
AAGTCTGTCTCGTTTA_14	Background
AATCCAGAGCGAAGGG_14	Background
AATCCAGAGGCCATAG_18	Background
AATCCAGCAACAACCT_18	Background
AATCCAGCAGACAGGT_20	Background
AATCCAGGTTAAGGGC_19	Background
AATCCAGTCTGTCCGT_20	Background
AATCGGTAGCAAATCA_14	Background
AATCGGTAGCTGCCCA_15	Background
AATCGGTCAGGGTACA_15	Background
AATCGGTCAGTAGAGC_15	Background
AATCGGTTCAGTTAGC_14	Background
AATCGGTTCAGTTAGC_15	Background
AATCGGTTCGAGCCCA_18	Background
AATCGGTTCGGGAGTA_19	Background
AATCGGTTCTCGCTTG_20	Background
ACACCAAAGCGATTCT_15	Background
ACACCAACAAGCCCAC_20	Background
ACACCAACACTAGTAC_18	Background
ACACCAACAGACGCCT_19	Background
ACACCAAGTGCACGAA_20	Background
ACACCAATCATAGCAC_18	Background
ACACCAATCTACCTGC_15	Background
ACACCCTAGAATCTCC_13	Background
ACACCCTCATCAGTCA_13	Background
ACACCCTCATGATCCA_19	Background
ACACCCTCATGTAGTC_15	Background
ACACCCTGTCCATCCT_20	Background
ACACCCTGTTGCTCCT_15	Background
ACACCCTTCAAACCAC_14	Background
ACACCCTTCAGAGGTG_19	Background
ACACCCTTCCAAATGC_20	Background
ACACCCTTCTCTGCTG_14	Background
ACACCGGAGCTGTTCA_18	Background
ACACCGGCAGGCTCAC_20	Background
ACACCGGGTACAAGTA_20	Background
ACACTGAAGAACTGTA_20	Background
ACACTGAAGACTAAGT_20	Background
ACACTGAAGCCATCGC_13	Background
ACACTGAAGCCATCGC_14	Background
ACACTGAAGCGCTCCA_20	Background
ACACTGAAGCGTCTAT_20	Background
ACACTGAAGGAATTAC_19	Background
ACACTGAAGGTACTCT_20	Background
ACACTGACACCCATTC_19	Background
ACACTGACATCACAAC_19	Background
ACACTGACATCGGAAG_20	Background
ACACTGAGTAGCCTAT_18	Background
ACACTGATCACCCTCA_16	Background
ACACTGATCAGTTAGC_19	Background
ACAGCCGAGAAACCAT_15	Background
ACAGCCGAGAATTCCC_15	Background
ACAGCCGAGGCCCGTT_15	Background
ACAGCCGCACAGACTT_18	Background
ACAGCCGCACGTTGGC_19	High-Risk
ACAGCCGCATGTTGAC_15	Background
ACAGCCGGTAAACCTC_19	Background
ACAGCCGGTTGCGCAC_15	Background
ACAGCCGTCATTATCC_20	Background
ACAGCTAAGATGAGAG_15	Background
ACAGCTAAGATTACCC_20	Background
ACAGCTAAGCTCCTTC_20	Background
ACAGCTAAGTGTTGAA_19	High-Risk
ACAGCTACACAGCCCA_13	Background
ACAGCTACACAGCCCA_14	Background
ACAGCTACATAGTAAG_20	Background
ACAGCTACATTGCGGC_20	Background
ACAGCTAGTTGAGGTG_15	Background
ACAGCTATCCAGAAGG_19	High-Risk
ACAGCTATCCTCCTAG_19	Background
ACAGCTATCGACAGCC_20	Background
ACAGCTATCGTTGACA_14	Background
ACAGCTATCTCAACTT_19	Background
ACAGCTATCTGATACG_20	Background
ACAGCTATCTTAACCT_20	Background
ACAGCTATCTTCTGGC_20	Background
ACATACGAGCGATATA_14	Background
ACATACGAGGACTGGT_14	High-Risk
ACATACGAGGAGTCTG_15	Background
ACATACGAGGGTTTCT_20	Background
ACATACGAGTTAGGTA_18	High-Risk
ACATACGCACGACGAA_20	Background
ACATACGGTACTTCTT_20	Background
ACATACGGTCTAGTGT_19	Background
ACATACGGTCTGCGGT_19	Background
ACATACGGTCTTCGTC_20	Background
ACATACGTCGTTGACA_20	Background
ACATCAGAGTACATGA_20	Background
ACATCAGCAGCCAGAA_20	Background
ACATCAGCATCATCCC_13	Background
ACATGGTAGCTAGCCC_14	Background
ACATGGTAGGGTTTCT_19	Background
ACATGGTAGTAGGCCA_20	Background
ACATGGTAGTTTGCGT_20	Background
ACATGGTGTCGGATCC_15	Background
ACATGGTGTGGTGTAG_14	Background
ACATGGTTCTGTCTAT_19	Background
ACCAGTAAGACTTGAA_20	Background
ACCAGTAAGAGTACAT_19	Background
ACCAGTAAGGTAAACT_20	Background
ACCAGTAAGTTACGGG_20	Background
ACCAGTACAATGGAGC_18	Background
ACCAGTACAGGGTATG_13	Background
ACCAGTATCGTAGATC_13	High-Risk
ACCCACTAGGTAGCTG_19	Background
ACCCACTAGTCAATAG_19	Background
ACCCACTCAGTGACAG_19	Background
ACCCACTCATGGGACA_19	Background
ACCCACTGTAATTGGA_19	Background
ACCCACTGTCCGTGAC_14	Background
ACCCACTGTTCAGGCC_13	Background
ACCCACTTCCACGACG_15	Background
ACCCACTTCCTGCTTG_20	Background
ACCGTAAAGGCTAGAC_20	Background
ACCGTAAAGTAGTGCG_14	Background
ACCGTAAAGTGGAGAA_19	Background
ACCGTAACACGGCCAT_14	High-Risk
ACCGTAAGTTGTACAC_13	High-Risk
ACCGTAAGTTGTACAC_14	Background
ACCGTAAGTTTGCATG_18	High-Risk
ACCGTAATCACCCTCA_19	Background
ACCGTAATCAGCTCGG_20	Background
ACCGTAATCATAGCAC_20	Background
ACCTTTAAGACGCAAC_20	Background
ACCTTTAAGGTGTTAA_19	Background
ACCTTTACAAGCGCTC_15	Background
ACCTTTACACAACGCC_19	Background
ACCTTTACAGCATACT_20	Background
ACCTTTAGTGGTTTCA_20	Background
ACGAGCCCAACACCTA_20	Background
ACGAGCCGTCAGCTAT_15	Background
ACGAGCCGTCTAGGTT_19	Background
ACGAGCCTCCTTGACC_20	Background
ACGAGGAAGAGTAAGG_20	Background
ACGAGGAAGTGGAGTC_20	Background
ACGAGGACAAGCCATT_20	Background
ACGAGGACACCAGGCT_20	Background
ACGAGGACAGTAAGAT_15	Background
ACGAGGACATTGGTAC_18	Background
ACGAGGAGTCAATGTC_20	Background
ACGAGGATCCCATTAT_20	Background
ACGAGGATCCTGCTTG_19	Background
ACGATACAGTCCGTAT_20	Background
ACGATACCATATACGC_20	Background
ACGATACGTAAGGATT_19	Background
ACGATACGTAATCGTC_19	Background
ACGATACGTCAGGACA_19	High-Risk
ACGATACGTCCTCTTG_20	High-Risk
ACGATACGTTATGCGT_14	Background
ACGATACTCAAACCGT_19	Background
ACGATACTCACGCGGT_14	Background
ACGATACTCCGATATG_13	Background
ACGATACTCCGCATCT_18	Background
ACGATACTCCGTCATC_20	Background
ACGATACTCGAGAGCA_20	Background
ACGATGTCACTAAGTC_19	Background
ACGATGTGTCAAAGCG_20	Background
ACGATGTGTGCTCTTC_19	Background
ACGCAGCAGCACCGTC_19	Background
ACGCAGCAGGACAGCT_19	Background
ACGCAGCCAGGCTGAA_20	High-Risk
ACGCAGCGTCGAGTTT_14	Background
ACGCAGCGTCTCTCGT_15	Background
ACGCAGCGTGTTTGTG_13	Background
ACGCAGCGTGTTTGTG_14	Background
ACGCAGCGTTTGTTTC_19	Background
ACGCAGCTCTTACCTA_20	Background
ACGCCAGAGACACTAA_20	Background
ACGCCAGAGAGGGATA_19	Background
ACGCCAGAGCAAATCA_19	Background
ACGCCAGGTCAGAAGC_20	Background
ACGCCAGTCAATACCG_19	Background
ACGCCAGTCCTCCTAG_20	Background
ACGCCGAAGATGTGGC_19	Background
ACGCCGACATCGGACC_19	Background
ACGCCGAGTAAATGAC_20	Background
ACGGAGAAGACGCAAC_15	Background
ACGGAGAAGCCCGAAA_19	Background
ACGGAGAAGCTACCGC_19	Background
ACGGAGAAGGACAGAA_15	Background
ACGGAGACAAGAAGAG_19	Background
ACGGAGACACAGACAG_20	Background
ACGGAGACACTCTGTC_19	Background
ACGGAGACATTAACCG_20	Background
ACGGAGAGTTACGCGC_19	Background
ACGGAGAGTTTACTCT_19	Background
ACGGAGATCAACGGGA_19	Background
ACGGAGATCCGATATG_13	Background
ACGGAGATCCTTTACA_19	Background
ACGGCCAAGTGAAGAG_18	High-Risk
ACGGCCAAGTTAGCGG_19	Background
ACGGCCAAGTTTAGGA_20	Background
ACGGCCACAAGCGAGT_13	Background
ACGGCCACAAGCGAGT_14	Background
ACGGCCACAAGCTGTT_15	Background
ACGGCCACATGCCTTC_15	Background
ACGGCCACATTCGACA_19	Background
ACGGCCAGTTCCCGAG_14	Background
ACGGCCATCTCGATGA_18	Background
ACGGCCATCTGGTATG_19	Background
ACGGGCTAGCTGTTCA_20	Background
ACGGGCTAGTGGCACA_20	Background
ACGGGCTAGTGGGATC_14	Background
ACGGGCTAGTGTCCCG_18	Background
ACGGGCTCAATGGAGC_15	Background
ACGGGCTGTAGCGCTC_20	Background
ACGGGCTGTAGCTTGT_20	Background
ACGGGCTTCAAACCAC_18	Background
ACGGGCTTCACGACTA_19	Background
ACGGGCTTCGTAGATC_13	Background
ACGGGCTTCTCTTGAT_20	Background
ACGGGTCAGTGCCATT_18	Background
ACGGGTCCATATGAGA_20	Background
ACGGGTCGTTTCGCTC_20	Background
ACGGGTCTCAACACAC_19	Background
ACGTCAAAGAAGGTTT_20	Background
ACGTCAAAGATGTAAC_18	Background
ACGTCAAAGGTACTCT_19	Background
ACGTCAAAGGTTACCT_20	Background
ACGTCAAAGTTACCCA_13	Background
ACGTCAAAGTTACCCA_14	Background
ACGTCAAGTAAATGTG_15	Background
ACGTCAAGTATAGGGC_14	Background
ACGTCAAGTTCTCATT_19	Background
ACGTCAATCAAGATCC_20	Background
ACTATCTAGATAGGAG_19	Background
ACTATCTAGGGAAACA_20	Background
ACTATCTAGGTAAACT_15	High-Risk
ACTATCTCACAGCCCA_20	Background
ACTATCTCACGTCAGC_19	Background
ACTATCTCAGTCGATT_20	Background
ACTATCTGTATGAATG_19	Background
ACTATCTGTCGCATCG_14	Background
ACTATCTGTCGCTTCT_20	Background
ACTGAACAGGTACTCT_14	Background
ACTGAACCAAGCGAGT_20	Background
ACTGAACCACCGAAAG_19	Background
ACTGAACCACGACGAA_15	Background
ACTGAACCAGCCTATA_20	Background
ACTGAACGTAAGGATT_15	Background
ACTGAACGTACCATCA_19	Background
ACTGAACGTCCAGTAT_20	Background
ACTGAACGTGAGGCTA_13	Background
ACTGAACTCCACTCCA_20	Background
ACTGAGTCACAAGACG_20	Background
ACTGAGTCACCGAATT_13	Background
ACTGAGTGTCATATGC_20	Background
ACTGAGTTCATGTAGC_20	Background
ACTGAGTTCTCCGGTT_15	Background
ACTGAGTTCTTTAGTC_19	Background
ACTGATGAGCAGGTCA_20	Background
ACTGATGAGTAGTGCG_14	High-Risk
ACTGATGAGTTGCAGG_15	Background
ACTGATGCAACTGGCC_13	Background
ACTGATGCAAGCGTAG_20	Background
ACTGATGCAGTCAGCC_20	Background
ACTGATGCAGTTCCCT_20	Background
ACTGATGGTCACTGGC_19	Background
ACTGATGGTGATGATA_20	Background
ACTGATGGTTGATTGC_19	Background
ACTGCTCAGACTCGGA_20	Background
ACTGCTCAGAGGTTGC_19	Background
ACTGCTCAGGTTCCTA_13	Background
ACTGCTCCAGCCAGAA_15	Background
ACTGCTCCATTGGGCC_20	Background
ACTGCTCGTTTCGCTC_18	High-Risk
ACTGTCCAGACCTAGG_19	Background
ACTGTCCAGCACCGTC_20	Background
ACTGTCCGTTGCGCAC_19	Background
ACTGTCCTCAAACGGG_15	Background
ACTGTCCTCGCCAAAT_20	Background
ACTGTCCTCGCCTGTT_20	Background
ACTTACTAGCAGATCG_15	Background
ACTTACTCACTAAGTC_13	Background
ACTTACTCATATACCG_20	Background
ACTTACTCATGCCCGA_20	Background
ACTTACTGTCGCATAT_20	Background
ACTTACTGTTGACGTT_20	Background
ACTTACTTCTGAGTGT_19	Background
ACTTGTTAGCCAGTAG_20	High-Risk
ACTTGTTAGTCTTGCA_19	Background
ACTTGTTCACGGCCAT_19	Background
ACTTGTTCACGTAAGG_20	Background
ACTTGTTCACTAAGTC_14	Background
ACTTGTTGTCGTTGTA_14	Background
ACTTGTTGTTGTACAC_20	Background
ACTTGTTTCAAAGACA_19	Background
ACTTGTTTCAAGGTAA_20	Background
ACTTGTTTCCAAACAC_20	Background
ACTTGTTTCTTATCTG_20	Background
ACTTGTTTCTTGACGA_15	Background
ACTTTCACAAGCCATT_18	Background
ACTTTCACACCGATAT_20	Background
ACTTTCAGTAGCTGCC_15	Background
AGAATAGAGTAGCCGA_15	Background
AGAATAGAGTGAAGTT_20	High-Risk
AGAATAGCAACGATGG_16	Background
AGAATAGCAAGCCTAT_14	Background
AGAATAGGTCTAGTGT_19	Background
AGACGTTAGCCCTAAT_20	Background
AGACGTTAGCTGGAAC_20	Background
AGACGTTAGGTTACCT_20	Background
AGACGTTTCAGCCTAA_15	Background
AGAGCGAAGCGTTTAC_19	High-Risk
AGAGCGAAGGTGGGTT_14	Background
AGAGCGAGTAAGAGGA_20	Background
AGAGCGAGTCTACCTC_20	Background
AGAGCGAGTTGGACCC_18	Background
AGAGCGAGTTGGGACA_20	Background
AGAGCGATCATTTGGG_19	Background
AGAGCGATCTCAACTT_20	Background
AGAGCTTAGATCTGCT_19	Background
AGAGCTTAGATGTTAG_14	Background
AGAGCTTAGTGCAAGC_20	Background
AGAGCTTAGTGGACGT_20	Background
AGAGCTTCAAGCCGTC_20	Background
AGAGCTTCACGAAGCA_18	High-Risk
AGAGCTTGTGCGGTAA_20	Background
AGAGCTTGTGGGTCAA_19	Background
AGAGCTTTCATGCATG_15	Background
AGAGCTTTCCTTAATC_20	Background
AGAGTGGAGGTAAACT_20	Background
AGAGTGGAGTCGTTTG_19	Background
AGAGTGGCAACGATCT_18	Background
AGAGTGGCACAAGCCC_20	Background
AGAGTGGCATACGCTA_15	Background
AGAGTGGCATACGCTA_16	Background
AGAGTGGGTACGAAAT_18	Background
AGAGTGGGTGTGTGCC_20	Background
AGAGTGGGTTCCATGA_18	Background
AGAGTGGGTTGACGTT_14	Background
AGAGTGGTCAATAAGG_20	Background
AGAGTGGTCAGTGTTG_15	Background
AGAGTGGTCCAATGGT_19	Background
AGAGTGGTCTAACTCT_14	Background
AGATCTGAGACTAGAT_19	Background
AGATCTGAGATCTGAA_20	Background
AGATCTGCAAAGGCGT_20	Background
AGATCTGCAGGACGTA_15	Background
AGATCTGCATGGTAGG_18	Background
AGATCTGGTCAGAAGC_18	Background
AGATCTGGTTGTACAC_20	Background
AGATCTGTCAAAGACA_15	Background
AGATCTGTCGCTTGTC_20	Background
AGATTGCAGGCAAAGA_20	Background
AGATTGCCAGACGCCT_15	Background
AGATTGCCATGGTTGT_20	Background
AGATTGCGTACAAGTA_20	Background
AGATTGCGTCGCGTGT_13	Background
AGATTGCGTCGCGTGT_14	Background
AGCAGCCAGGCCATAG_19	Background
AGCAGCCAGTTAGGTA_18	Background
AGCAGCCCAAGAAGAG_13	Background
AGCAGCCCAAGACACG_20	High-Risk
AGCAGCCCACTCTGTC_20	Background
AGCAGCCGTAGGAGTC_13	Background
AGCAGCCGTGAGTATA_20	Background
AGCAGCCTCAGCATGT_18	Background
AGCATACAGTCGATAA_13	Background
AGCATACCAATCCAAC_15	Background
AGCATACCACGTGAGA_14	Background
AGCATACCATTCTCAT_19	Background
AGCATACGTGCAGGTA_19	Background
AGCATACTCGTCGTTC_15	Background
AGCATACTCTCAAGTG_20	Background
AGCATACTCTCCCTGA_16	Background
AGCCTAAAGACCTTTG_15	Background
AGCCTAAAGCCTTGAT_20	High-Risk
AGCCTAACAATCGAAA_15	Background
AGCCTAACACAAGCCC_15	Background
AGCCTAACACAGGCCT_19	Background
AGCCTAACACGCCAGT_18	Background
AGCCTAACATGACATC_20	Background
AGCCTAACATTACGAC_19	Background
AGCCTAAGTATCACCA_15	Background
AGCCTAAGTTACGCGC_20	Background
AGCGGTCAGACCACGA_19	Background
AGCGGTCAGATGAGAG_20	Background
AGCGGTCAGCATCATC_15	Background
AGCGGTCCAATAAGCA_13	Background
AGCGGTCCAATAAGCA_14	Background
AGCGGTCCACCAGTTA_15	Background
AGCGGTCCACCCATTC_20	Background
AGCGGTCCAGCCTGTG_18	Background
AGCGGTCTCAGCTGGC_19	Background
AGCGGTCTCCAGATCA_15	Background
AGCGGTCTCGACGGAA_13	Background
AGCGGTCTCGTGGTCG_19	Background
AGCGGTCTCTTCGGTC_19	Background
AGCGGTCTCTTGAGAC_19	Background
AGCGGTCTCTTGGGTA_20	Background
AGCGTATAGCCCAGCT_15	Background
AGCGTATCAGGATCGA_19	High-Risk
AGCGTATGTTATTCTC_18	Background
AGCGTATTCAACACTG_15	Background
AGCGTATTCCCTGACT_13	Background
AGCGTATTCGAGAACG_13	Background
AGCGTCGAGACCACGA_19	Background
AGCGTCGAGATGGCGT_14	Background
AGCGTCGCACAAGCCC_19	Background
AGCGTCGCACAAGTAA_14	Background
AGCGTCGCACAGAGGT_13	Background
AGCGTCGCACGCTTTC_14	High-Risk
AGCGTCGCAGTAAGCG_13	Background
AGCGTCGTCAACGAAA_16	Background
AGCGTCGTCGGCCGAT_20	Background
AGCTCCTAGACAGACC_13	Background
AGCTCCTAGACAGACC_14	Background
AGCTCCTAGACTAAGT_20	Background
AGCTCCTGTAAGAGGA_13	Background
AGCTCCTGTAAGAGGA_14	Background
AGCTCCTGTAGCGTAG_20	Background
AGCTCCTTCCACTGGG_20	Background
AGCTCCTTCTGTCTAT_13	Background
AGCTCTCAGCGATAGC_18	High-Risk
AGCTCTCAGGGTTTCT_20	Background
AGCTCTCAGGTCATCT_20	Background
AGCTCTCAGGTGATTA_15	Background
AGCTCTCAGTCGATAA_15	Background
AGCTCTCCAGATGAGC_20	Background
AGCTCTCGTAGGAGTC_13	Background
AGCTCTCTCCGTTGTC_20	Background
AGCTCTCTCGCATGGC_18	Background
AGCTCTCTCGCGATCG_14	High-Risk
AGCTCTCTCGGAGGTA_20	Background
AGCTTGAAGACAGGCT_20	Background
AGCTTGAAGATCTGAA_18	Background
AGCTTGAAGGACAGCT_13	High-Risk
AGCTTGAAGGACAGCT_14	High-Risk
AGCTTGAAGGATCGCA_19	Background
AGCTTGAAGTAGTGCG_19	Background
AGCTTGACAAACCTAC_20	Background
AGCTTGACACAGACTT_15	Background
AGCTTGACACCATCCT_13	Background
AGCTTGACAGATTGCT_20	Background
AGCTTGACATAGAAAC_18	Background
AGCTTGAGTAAGGATT_19	Background
AGCTTGATCATTCACT_14	Background
AGCTTGATCATTCACT_15	Background
AGGCCACAGCTAACTC_20	Background
AGGCCACAGTCCATAC_15	Background
AGGCCACAGTGGTCCC_16	Background
AGGCCACCACGGTAAG_20	Background
AGGCCACGTAAACACA_13	Background
AGGCCACGTACGCACC_20	Background
AGGCCACGTGACGCCT_14	High-Risk
AGGCCACGTGCGCTTG_19	Background
AGGCCACGTTCAGTAC_13	Background
AGGCCACTCACATAGC_13	Background
AGGCCACTCACCAGGC_13	Background
AGGCCACTCCAGTAGT_18	Background
AGGCCGTAGCGATGAC_13	Background
AGGCCGTAGCGATGAC_14	Background
AGGCCGTAGCTTATCG_19	Background
AGGCCGTAGTGCGTGA_15	Background
AGGCCGTAGTGGAGAA_20	High-Risk
AGGCCGTCACGGATAG_19	Background
AGGCCGTCAGTGAGTG_19	Background
AGGCCGTTCAGCGACC_15	Background
AGGCCGTTCTGTTTGT_14	Background
AGGGAGTAGTGCCAGA_13	Background
AGGGAGTAGTGCCAGA_14	Background
AGGGAGTCAGCGTCCA_15	Background
AGGGAGTCAGTTAACC_16	Background
AGGGAGTTCTAACTGG_20	Background
AGGGATGAGAACAATC_18	Background
AGGGATGAGCGTTTAC_18	Background
AGGGATGCAGTAACGG_13	Background
AGGGATGCAGTCGTGC_15	High-Risk
AGGGATGGTCACACGC_20	Background
AGGGATGGTCACTTCC_15	Background
AGGGATGGTTCGGCAC_13	High-Risk
AGGGATGGTTTGCATG_14	Background
AGGGATGTCAGCTTAG_14	Background
AGGGATGTCTCTGAGA_20	Background
AGGGATGTCTGCTGTC_19	Background
AGGGTGACAATAGCAA_14	Background
AGGGTGATCTACCTGC_19	Background
AGGGTGATCTGCGACG_20	Background
AGGTCATAGACACGAC_15	Background
AGGTCATAGCTCCCAG_19	Background
AGGTCATCAGGTTTCA_19	Background
AGGTCATGTCCTCCAT_20	Background
AGGTCATGTGAAAGAG_15	Background
AGGTCATGTGAGTGAC_19	Background
AGGTCATGTGTTAAGA_16	Background
AGGTCATTCAGGTAAA_15	Background
AGGTCATTCCATGAAC_19	Background
AGGTCATTCGAATGGG_20	Background
AGGTCATTCTAACTCT_14	Background
AGGTCATTCTTGCCGT_19	Background
AGGTCCGCAAACAACA_19	High-Risk
AGGTCCGGTAAGAGGA_20	Background
AGGTCCGGTAATAGCA_18	Background
AGGTCCGGTAGGGACT_20	Background
AGGTCCGGTATGGTTC_20	Background
AGGTCCGGTGATAAGT_13	High-Risk
AGGTCCGGTGCGAAAC_19	Background
AGGTCCGGTTTGACAC_13	Background
AGGTCCGTCAAGGCTT_19	Background
AGGTCCGTCTCTAGGA_20	Background
AGGTCCGTCTGCAAGT_20	Background
AGTAGTCAGAGCTGCA_20	Background
AGTAGTCAGCAGGTCA_20	Background
AGTAGTCCAGTATGCT_19	Background
AGTAGTCTCGCATGAT_14	Background
AGTCTTTAGAATTCCC_20	Background
AGTCTTTCACCGAATT_14	Background
AGTCTTTGTAGGCATG_20	Background
AGTCTTTGTCATGCCG_18	Background
AGTCTTTGTGTGACCC_20	Background
AGTCTTTGTTGCCTCT_19	Background
AGTCTTTGTTGCGTTA_14	Background
AGTCTTTTCAAGGTAA_20	Background
AGTCTTTTCACCAGGC_20	Background
AGTCTTTTCTCGATGA_19	Background
AGTGAGGAGCGTAGTG_20	Background
AGTGAGGAGCTTCGCG_19	Background
AGTGAGGAGGACCACA_19	Background
AGTGAGGAGTTAGGTA_20	Background
AGTGAGGCATGTTCCC_20	Background
AGTGAGGGTCTAGGTT_20	Background
AGTGAGGGTTGTACAC_20	Background
AGTGGGAAGAGTACAT_18	Background
AGTGGGAAGCTGCCCA_18	Background
AGTGGGAAGTACATGA_20	Background
AGTGGGAAGTAGGTGC_19	Background
AGTGGGAAGTCACGCC_20	Background
AGTGGGAAGTGTTGAA_19	Background
AGTGGGACAGGCGATA_19	Background
AGTGGGAGTATTACCG_20	Background
AGTGGGAGTCGCTTCT_14	Background
AGTGGGATCGGATGGA_19	Background
AGTGGGATCTGTTTGT_13	Background
AGTGTCAAGCGTAATA_20	Background
AGTGTCAAGTAGCGGT_19	Background
AGTGTCAAGTTTCCTT_19	Background
AGTGTCACAATTCCTT_19	Background
AGTGTCACAGGTGCCT_20	Background
AGTGTCACAGTTTACG_14	Background
AGTGTCAGTACATGTC_19	Background
AGTGTCAGTGATGCCC_19	Background
AGTGTCAGTTCGCGAC_15	Background
AGTGTCAGTTCTGGTA_20	Background
AGTGTCATCATCTGCC_19	High-Risk
AGTTGGTAGCAGACTG_13	Background
AGTTGGTAGCAGACTG_14	Background
AGTTGGTCAAACGTGG_13	Background
AGTTGGTCACAAGACG_18	Background
AGTTGGTCACCTATCC_13	Background
AGTTGGTGTAGATTAG_18	High-Risk
AGTTGGTGTATAGGTA_19	Background
AGTTGGTGTCCGCTGA_14	Background
AGTTGGTGTTTCGCTC_18	Background
AGTTGGTTCAGCGACC_20	Background
AGTTGGTTCATGCAAC_20	High-Risk
AGTTGGTTCTTAGAGC_20	Background
AGTTGGTTCTTGAGAC_20	Background
ATAACGCAGCCAACAG_15	Background
ATAACGCAGCTCAACT_18	Background
ATAACGCAGTCTCGGC_19	Background
ATAACGCCAGTTAACC_20	Background
ATAACGCGTCTCTCTG_20	Background
ATAACGCGTGCAACGA_16	Background
ATAACGCGTTTGTGTG_14	Background
ATAAGAGAGAGTCTGG_20	Background
ATAAGAGCAGGGTTAG_20	Background
ATAAGAGGTAAACGCG_20	Background
ATAAGAGGTAGAAAGG_19	Background
ATAAGAGGTTACTGAC_20	Background
ATAAGAGGTTCACCTC_19	Background
ATAAGAGTCAGTCCCT_15	Background
ATAAGAGTCGTCACGG_14	Background
ATAGACCAGGGAACGG_20	Background
ATAGACCCATGTCCTC_20	Background
ATAGACCGTATATGAG_19	Background
ATAGACCGTGTTGGGA_15	Background
ATAGACCGTTAAGTAG_17	Background
ATAGACCGTTGGTGGA_15	Background
ATAGACCTCCCTTGTG_13	Background
ATCACGAAGACCTTTG_16	Background
ATCACGAAGTCCGTAT_15	Background
ATCACGACACACGCTG_15	Background
ATCACGACACGTCTCT_14	Background
ATCACGACACTGTGTA_18	Background
ATCACGACAGCCACCA_14	Background
ATCACGAGTAAGTAGT_20	Background
ATCACGAGTAGCAAAT_19	Background
ATCACGAGTGTGACGA_20	Background
ATCACGATCACTTACT_19	Background
ATCACGATCCCGGATG_15	Background
ATCACGATCTTATCTG_20	Background
ATCATCTAGAACAACT_20	Background
ATCATCTAGAGAGCTC_16	Background
ATCATCTAGCGCCTTG_19	Background
ATCATCTAGTACACCT_19	Background
ATCATCTCACGGTAAG_15	Background
ATCATCTCAGCATACT_15	Background
ATCATCTCAGCCTTTC_19	Background
ATCATCTGTAAACGCG_19	Background
ATCATCTGTCATTAGC_14	Background
ATCATCTGTCTACCTC_19	Background
ATCATCTTCCTTTCGG_19	Background
ATCATCTTCTCAACTT_19	Background
ATCATGGAGATAGCAT_19	High-Risk
ATCATGGAGTGAACAT_20	Background
ATCATGGAGTGCTGCC_19	Background
ATCATGGCACTTGGAT_20	Background
ATCCACCAGCGTTTAC_13	Background
ATCCACCAGCTAACTC_13	Background
ATCCACCAGTTGAGTA_19	Background
ATCCACCCAGAAGCAC_13	Background
ATCCACCCAGAAGCAC_14	Background
ATCCACCCATACTCTT_20	Background
ATCCACCGTCCATCCT_15	High-Risk
ATCCACCGTCTTGCGG_18	Background
ATCCACCTCGGCATCG_20	Background
ATCCACCTCGGCGGTT_14	Background
ATCCACCTCTCTAAGG_19	Background
ATCCGAAAGGGATGGG_15	Background
ATCCGAACACGCGAAA_18	Background
ATCCGAACACGTCAGC_20	Background
ATCCGAACACTGAAGG_15	Background
ATCCGAACAGATGAGC_20	Background
ATCCGAAGTCCTAGCG_14	High-Risk
ATCCGAAGTCTAGGTT_20	Background
ATCGAGTAGCCAGGAT_18	Background
ATCGAGTAGCCGATTT_20	Background
ATCGAGTAGCTAAACA_15	Background
ATCGAGTAGGCAAAGA_14	Background
ATCGAGTAGGCGACAT_19	Background
ATCGAGTAGTGATCGG_15	Background
ATCGAGTCACTGTTAG_14	Background
ATCGAGTTCTTTACAC_20	Background
ATCTACTAGTCTCGGC_18	Background
ATCTACTAGTGTTTGC_14	High-Risk
ATCTACTCAATACGCT_20	Background
ATCTACTGTATTCTCT_19	Background
ATCTACTGTCACAAGG_20	Background
ATCTACTGTCTTCAAG_20	Background
ATCTACTTCATCATTC_16	Background
ATCTACTTCGCCGTGA_20	Background
ATCTGCCAGAGCCTAG_14	High-Risk
ATCTGCCAGAGCTGGT_20	Background
ATCTGCCAGAGTAAGG_19	Background
ATCTGCCAGATATGCA_19	Background
ATCTGCCCAAGCGATG_18	Background
ATCTGCCCACCTCGTT_20	Background
ATCTGCCCACTTAACG_14	Background
ATCTGCCGTCAGAATA_18	Background
ATCTGCCTCAACCATG_19	Background
ATCTGCCTCCTCTAGC_15	Background
ATGAGGGAGAATGTGT_19	Background
ATGAGGGAGCTGCCCA_18	Background
ATGAGGGAGTGAATTG_20	Background
ATGAGGGGTTCAACCA_20	Background
ATGAGGGGTTGCGTTA_18	Background
ATGAGGGTCGCTAGCG_20	Background
ATGCGATAGACTTGAA_20	Background
ATGCGATAGATGAGAG_20	Background
ATGCGATAGTGTACGG_20	Background
ATGCGATCAAGTTAAG_19	Background
ATGCGATCACGCATCG_19	Background
ATGCGATCAGTCAGAG_13	Background
ATGCGATCAGTCAGAG_14	Background
ATGCGATTCGCCGTGA_20	Background
ATGCGATTCTATGTGG_19	Background
ATGGGAGAGACTAGGC_20	High-Risk
ATGGGAGAGATGTCGG_20	Background
ATGGGAGAGCGAAGGG_20	Background
ATGGGAGAGGAGTAGA_20	Background
ATGGGAGCATACCATG_14	Background
ATGGGAGGTACTCAAC_13	Background
ATGGGAGGTACTCAAC_14	Background
ATGGGAGGTCGAGATG_18	Background
ATGGGAGGTGGCGAAT_14	Background
ATGGGAGGTGGCGAAT_15	Background
ATGGGAGGTTCCATGA_20	Background
ATGGGAGTCCAAACAC_14	Background
ATGTGTGAGTGGTCCC_19	Background
ATGTGTGGTGACCAAG_20	Background
ATGTGTGGTTAGTGGG_20	Background
ATGTGTGTCTTTACGT_14	Background
ATTACTCAGAGACGAA_13	Background
ATTACTCAGAGACGAA_14	Background
ATTACTCAGCAGGCTA_15	Background
ATTACTCAGGCATGTG_13	Background
ATTACTCCAATGCCAT_13	Background
ATTACTCCACAGGCCT_13	Background
ATTACTCCACATAACC_20	Background
ATTACTCCACTGAAGG_20	Background
ATTACTCGTGTGGTTT_20	Background
ATTACTCGTTATCGGT_19	Background
ATTATCCAGGCAAAGA_14	Background
ATTATCCAGGCAAAGA_15	Background
ATTATCCAGGCCCTTG_20	Background
ATTATCCCAAGTCTGT_20	Background
ATTATCCCAATCTACG_15	Background
ATTATCCCACACCGCA_20	Background
ATTATCCCAGATTGCT_15	Background
ATTATCCCATTGGTAC_15	Background
ATTATCCGTAAGGATT_14	Background
ATTATCCGTAGCCTCG_19	Background
ATTATCCGTCAGCTAT_19	High-Risk
ATTATCCGTTCAGCGC_15	Background
ATTATCCGTTCAGTAC_20	Background
ATTCTACAGCTTATCG_13	Background
ATTCTACAGCTTATCG_14	Background
ATTCTACAGTCAAGCG_19	Background
ATTCTACAGTCGAGTG_13	Background
ATTCTACAGTCGAGTG_14	Background
ATTCTACAGTTGTAGA_13	Background
ATTCTACCAATGTTGC_14	Background
ATTCTACCACAGGAGT_13	Background
ATTCTACCATCCCATC_13	Background
ATTCTACGTCAGAGGT_19	Background
ATTCTACGTCGCATAT_19	Background
ATTCTACGTTATTCTC_19	Background
ATTCTACTCAGAGCTT_20	Background
ATTCTACTCCCTCAGT_15	Background
ATTCTACTCGATAGAA_20	Background
ATTCTACTCTACTTAC_20	Background
ATTCTACTCTCGAGTA_20	Background
ATTGGACAGTACATGA_19	Background
ATTGGACAGTACGTAA_20	Background
ATTGGACAGTTTCCTT_20	Background
ATTGGACCAAACCCAT_20	Background
ATTGGACGTGCGATAG_20	Background
ATTGGACGTGGGTCAA_15	Background
ATTGGACGTGGTGTAG_20	Background
ATTGGACTCGTCCAGG_19	Background
ATTGGTGCAATAGCAA_19	High-Risk
ATTGGTGCACACTGCG_19	Background
ATTGGTGCAGCCAATT_13	Background
ATTTCTGAGACACTAA_20	Background
ATTTCTGAGTTCGCAT_20	Background
ATTTCTGCAATGTTGC_15	Background
ATTTCTGCACTAAGTC_15	Background
ATTTCTGCAGCCTGTG_13	Background
ATTTCTGCAGCCTGTG_14	Background
ATTTCTGCATCAGTCA_19	Background
ATTTCTGCATGCATGT_20	Background
ATTTCTGGTAAATACG_20	Background
ATTTCTGGTAAGCACG_20	Background
ATTTCTGGTATCACCA_19	Background
ATTTCTGGTATCTGCA_20	Background
ATTTCTGTCAGTTCGA_19	Background
CAACCAAAGAAACCGC_20	Background
CAACCAAAGAGGTACC_14	Background
CAACCAAAGATGTGTA_19	Background
CAACCAAAGCACGCCT_20	Background
CAACCAAAGCCACGCT_19	High-Risk
CAACCAAAGGCGCTCT_19	Background
CAACCAAAGTTTCCTT_13	Background
CAACCAACAAACAACA_19	Background
CAACCAACATGATCCA_19	Background
CAACCAAGTAAGTGTA_19	Background
CAACCAAGTACCGTAT_14	Background
CAACCAAGTGCCTTGG_14	Background
CAACCAAGTGCCTTGG_20	Background
CAACCAAGTTGCCTCT_18	Background
CAACCTCAGAAGGACA_15	Background
CAACCTCAGATGAGAG_20	Background
CAACCTCCAAGCGATG_20	Background
CAACCTCCAATGAAAC_20	High-Risk
CAACCTCCAGATAATG_14	Background
CAACCTCGTTCAGCGC_13	Background
CAACCTCTCAGCTGGC_20	Background
CAACCTCTCGTGGTCG_20	Background
CAACTAGAGCGCTCCA_18	High-Risk
CAACTAGAGGAATCGC_19	Background
CAACTAGAGGCAGGTT_19	Background
CAACTAGAGTGAACAT_19	Background
CAACTAGCAAGGTTCT_15	Background
CAACTAGCAAGGTTCT_16	Background
CAACTAGCACTTGGAT_19	Background
CAACTAGCATACTCTT_15	Background
CAACTAGGTCAGCTAT_16	Background
CAACTAGGTTTGGGCC_20	Background
CAACTAGTCAAAGTAG_18	Background
CAACTAGTCGCTGATA_20	Background
CAAGAAAAGCATGGCA_14	Background
CAAGAAAAGCATGGCA_15	Background
CAAGAAAAGCATGGCA_16	Background
CAAGAAAAGGCAATTA_14	Background
CAAGAAAAGTTGAGAT_13	Background
CAAGAAACACTGAAGG_19	Background
CAAGAAACAGGGTACA_13	Background
CAAGAAAGTGAGGCTA_15	High-Risk
CAAGAAATCAGTTGAC_19	Background
CAAGAAATCCTAGAAC_13	Background
CAAGAAATCCTAGAAC_16	Background
CAAGATCAGGTGATTA_19	Background
CAAGATCCACATGGGA_15	Background
CAAGATCCAGTCCTTC_13	Background
CAAGATCCAGTCCTTC_14	Background
CAAGATCGTTATTCTC_13	Background
CAAGATCTCTTATCTG_15	Background
CAAGGCCAGTCCAGGA_19	Background
CAAGGCCCAAGTCTAC_19	Background
CAAGGCCCATTCTTAC_19	Background
CAAGGCCGTCCCTACT_15	Background
CAAGGCCGTCCCTACT_20	Background
CAAGGCCTCAATACCG_18	Background
CAAGGCCTCACGCGGT_15	Background
CAAGTTGCAATACGCT_19	Background
CAAGTTGCACATGTGT_20	Background
CAAGTTGCATCGATTG_14	Background
CAAGTTGGTCTTGATG_20	Background
CAAGTTGGTTCCAACA_15	Background
CAAGTTGGTTTAGCTG_20	High-Risk
CAAGTTGTCACTATTC_20	Background
CAAGTTGTCCCTAATT_19	Background
CAAGTTGTCGGCATCG_15	Background
CACAAACAGAGCTGGT_14	Background
CACAAACCAGGTGGAT_20	Background
CACAAACGTATTCTCT_20	Background
CACAAACGTCTAACGT_13	Background
CACAAACGTGGTGTAG_19	Background
CACAAACGTGTGAATA_15	Background
CACAAACTCAGGCGAA_20	Background
CACAAACTCTGTACGA_20	Background
CACAAACTCTGTTGAG_20	Background
CACACAAAGCCTATGT_19	Background
CACACAACACGAGAGT_13	Background
CACACAATCCAAACTG_20	Background
CACACAATCCACTGGG_15	Background
CACACAATCCGGCACA_19	Background
CACACAATCGTGGACC_15	Background
CACACAATCTCAAGTG_18	Background
CACACCTAGGCCCTTG_14	Background
CACACCTAGTCTCGGC_20	Background
CACACCTAGTGTACGG_14	Background
CACACCTCACGAAGCA_14	Background
CACACCTCAGCCTGTG_19	Background
CACACCTCAGCTGTTA_20	Background
CACACCTGTGGGTCAA_20	Background
CACACCTTCACAACGT_19	Background
CACACCTTCACCCTCA_20	Background
CACACCTTCATAGCAC_20	Background
CACACCTTCCGAGCCA_14	Background
CACACCTTCTCACATT_15	Background
CACACTCAGGTTCCTA_20	Background
CACACTCAGTAGGTGC_20	High-Risk
CACACTCCATCGGACC_20	Background
CACACTCGTAAGCACG_14	Background
CACACTCGTAAGCACG_15	Background
CACACTCGTCGAACAG_18	Background
CACACTCTCCAAAGTC_13	Background
CACACTCTCCAAAGTC_14	Background
CACACTCTCCAAGTAC_19	Background
CACAGGCAGAAGGCCT_20	Background
CACAGGCAGACATAAC_19	Background
CACAGGCAGGTGCAAC_15	Background
CACAGGCAGTTTAGGA_20	High-Risk
CACAGGCCAACGATGG_20	Background
CACAGGCCAATTCCTT_20	Background
CACAGGCCACGCGAAA_20	Background
CACAGGCCACGGCTAC_19	Background
CACAGGCGTCTGCAAT_19	Background
CACAGGCGTTCAGGCC_18	Background
CACAGGCTCATTCACT_20	Background
CACAGGCTCCATTCTA_15	Background
CACAGTAAGTACGCCC_13	Background
CACAGTACAATGGACG_20	Background
CACAGTACAGTCGTGC_14	Background
CACAGTACATAACCTG_19	Background
CACAGTAGTAAATACG_19	Background
CACAGTATCGGAAATA_20	Background
CACATAGGTACCGTAT_15	Background
CACATAGGTGCAACTT_19	Background
CACATAGGTTTCCACC_20	Background
CACATAGTCAGAAATG_15	Background
CACATAGTCCTTTCTC_20	Background
CACATAGTCGGTGTTA_20	Background
CACATAGTCTGCGACG_20	Background
CACATTTAGACTCGGA_18	Background
CACATTTAGCCAACAG_20	Background
CACATTTAGTGGTAGC_15	Background
CACATTTCAGATTGCT_18	Background
CACATTTGTACGAAAT_19	Background
CACATTTGTAGCACGA_15	Background
CACATTTGTCATATGC_20	Background
CACATTTTCAAGAAGT_13	Background
CACATTTTCAAGAAGT_14	Background
CACATTTTCAGTTTGG_19	Background
CACATTTTCCGTACAA_14	Background
CACATTTTCCTTGCCA_14	Background
CACATTTTCCTTGCCA_15	Background
CACCACTAGTCCAGGA_20	Background
CACCACTCATCGGAAG_15	Background
CACCACTCATGAGCGA_19	Background
CACCACTGTCCGAAGA_15	Background
CACCACTGTCCGACGT_16	Background
CACCACTGTCGCCATG_19	Background
CACCACTGTCTGCGGT_20	Background
CACCACTTCCTGTACC_20	Background
CACCAGGAGACAAGCC_18	Background
CACCAGGAGATATGGT_20	Background
CACCAGGAGCTCCCAG_20	Background
CACCAGGAGGAATGGA_19	Background
CACCAGGCAGTCTTCC_20	Background
CACCAGGCATTCCTCG_19	Background
CACCAGGGTACGCACC_20	Background
CACCAGGGTCGACTGC_19	Background
CACCAGGGTTACTGAC_20	Background
CACCAGGGTTCTGGTA_19	Background
CACCAGGGTTTCCACC_15	Background
CACCAGGTCATTGCCC_14	Background
CACCAGGTCCCATTTA_15	Background
CACCAGGTCCTGCCAT_15	Background
CACCAGGTCGCCTGTT_19	Background
CACCTTGAGGCGTACA_19	Background
CACCTTGTCCGCATCT_19	Background
CACCTTGTCCTGCTTG_20	Background
CACCTTGTCGTCGTTC_20	Background
CACTCCACAGGGATTG_20	Background
CACTCCAGTGTGCCTG_14	Background
CACTCCATCTGGCGAC_20	Background
CAGAATCCAGGTCGTC_14	Background
CAGAATCGTAAGAGAG_19	Background
CAGAATCGTTTGCATG_20	Background
CAGAATCGTTTGTGTG_20	Background
CAGAATCTCGATCCCT_18	Background
CAGAGAGAGCCACTAT_18	Background
CAGAGAGAGTGAATTG_16	Background
CAGAGAGCAGAAGCAC_19	Background
CAGAGAGCAGCGTTCG_20	Background
CAGAGAGCAGTCTTCC_13	Background
CAGAGAGCATCACGTA_13	Background
CAGAGAGGTCCATGAT_20	Background
CAGAGAGGTCGCCATG_19	Background
CAGAGAGTCCACGTGG_18	Background
CAGATCAAGAGTCGGT_13	High-Risk
CAGATCAAGAGTCGGT_14	Background
CAGATCAAGATCTGCT_14	Background
CAGATCAAGATGGGTC_14	Background
CAGATCACAAACTGTC_20	Background
CAGATCACAGAGTGTG_19	Background
CAGATCACATGCATGT_16	Background
CAGATCAGTCGGCACT_19	Background
CAGATCAGTTCACGGC_20	Background
CAGATCAGTTTACTCT_20	Background
CAGATCATCAGGCAAG_15	Background
CAGATCATCATAGCAC_19	Background
CAGATCATCGGCATCG_13	Background
CAGATCATCTGTACGA_19	Background
CAGCAGCAGAGCCCAA_19	Background
CAGCAGCAGAGTACCG_14	Background
CAGCAGCAGCTGCGAA_19	Background
CAGCAGCCACAGAGGT_13	Background
CAGCAGCCATGCCCGA_20	Background
CAGCAGCGTACTCTCC_20	Background
CAGCAGCTCAACACTG_20	Background
CAGCATAGTGAGGGAG_18	Background
CAGCCGAAGTACGTTC_15	Background
CAGCCGAAGTTTAGGA_20	Background
CAGCCGACAGACTCGC_20	Background
CAGCCGACATGTTGAC_15	Background
CAGCCGAGTCCAGTGC_19	High-Risk
CAGCCGATCCCATTTA_19	Background
CAGCCGATCGTAGGAG_18	Background
CAGCGACCACCAGATT_20	Background
CAGCGACCAGTGGGAT_20	High-Risk
CAGCGACCATAAAGGT_20	Background
CAGCGACGTAAGGATT_14	Background
CAGCGACTCCACGTTC_20	Background
CAGCGACTCCAGAGGA_15	Background
CAGCGACTCCCATTAT_19	Background
CAGCGACTCCGTCATC_19	Background
CAGCGACTCGCCCTTA_19	Background
CAGCGACTCGGTGTCG_13	Background
CAGCGACTCTCGCATC_20	Background
CAGCTAAAGCGTGAAC_19	Background
CAGCTAAAGCTAGTGG_15	Background
CAGCTAAAGGGATGGG_19	Background
CAGCTAAAGTTCGATC_13	Background
CAGCTAACAGGTCCAC_19	Background
CAGCTAACATCCGTGG_19	Background
CAGCTAACATCCTTGC_20	Background
CAGCTAAGTCGGATCC_19	Background
CAGCTGGAGATCTGCT_13	Background
CAGCTGGAGATCTGCT_14	Background
CAGCTGGAGATGTAAC_19	Background
CAGCTGGAGTAGCCGA_20	Background
CAGCTGGCAGTAGAGC_19	High-Risk
CAGCTGGGTCGGGTCT_15	Background
CAGCTGGGTGCGGTAA_19	Background
CAGCTGGTCAATCTCT_18	Background
CAGCTGGTCCGTTGTC_13	Background
CAGCTGGTCGCATGGC_19	Background
CAGCTGGTCGTCCAGG_20	Background
CAGGTGCAGGACATTA_15	Background
CAGGTGCAGTACGACG_18	Background
CAGGTGCCACAGATTC_19	Background
CAGGTGCGTAGGACAC_20	Background
CAGGTGCGTCAACATC_19	Background
CAGGTGCGTGCGATAG_20	Background
CAGTAACCAAGCGAGT_13	Background
CAGTAACCACAGGTTT_19	Background
CAGTAACCAGGGCATA_20	Background
CAGTAACGTAAGGGCT_20	Background
CAGTAACGTATAGTAG_20	Background
CAGTAACGTCAGTGGA_20	Background
CAGTAACGTCTAGGTT_19	High-Risk
CAGTAACTCGCCCTTA_14	Background
CAGTCCTAGGCTACGA_20	Background
CAGTCCTAGGGTATCG_20	High-Risk
CAGTCCTGTTCGGCAC_20	Background
CAGTCCTTCACGCATA_20	Background
CAGTCCTTCGTAGGAG_18	Background
CATATGGAGAAGCCCA_14	Background
CATATGGAGAAGCCCA_15	Background
CATATGGAGCTAGTGG_14	Background
CATATGGCAAGCCGCT_19	Background
CATATGGCAAGCGCTC_19	Background
CATATGGCAAGCTGAG_20	Background
CATATGGCACTTCTGC_20	Background
CATATGGCATGCTGGC_19	Background
CATATGGTCACATGCA_19	Background
CATATGGTCACCTTAT_20	Background
CATATTCAGCAGCCTC_20	Background
CATATTCAGTATGACA_15	Background
CATATTCAGTATGACA_16	Background
CATATTCGTAAACGCG_20	Background
CATATTCGTAGCTGCC_14	Background
CATATTCGTCTAGTGT_14	Background
CATATTCGTGCCTTGG_19	Background
CATCAAGCAGATCCAT_15	Background
CATCAAGCATCGTCGG_19	Background
CATCAAGCATTGGGCC_19	Background
CATCAAGGTAGAAAGG_15	Background
CATCAAGGTCGAATCT_19	Background
CATCAAGGTCGAGATG_19	Background
CATCAAGTCCGCATAA_20	Background
CATCAGAAGAACAATC_20	Background
CATCAGACACAGGAGT_18	Background
CATCAGACACCGCTAG_15	Background
CATCAGACATCGGGTC_18	Background
CATCAGATCCACGTGG_20	Background
CATCCACAGAAGGGTA_20	Background
CATCCACCAAACTGTC_18	Background
CATCCACCAAAGAATC_20	Background
CATCCACCAAGTAGTA_20	Background
CATCCACCACATCTTT_19	Background
CATCCACCACGCCAGT_19	Background
CATCCACCAGAGTGTG_15	Background
CATCCACCATAAGACA_20	Background
CATCCACTCCTGCCAT_15	Background
CATCGAACAAGTCATC_16	Background
CATCGAACAGGTGCCT_15	Background
CATCGAAGTAAATACG_20	Background
CATCGAAGTAATAGCA_19	Background
CATCGAAGTCCGTTAA_19	Background
CATCGAAGTGCCTGCA_20	Background
CATCGAATCAGTCAGT_19	Background
CATCGGGAGAGGGCTT_18	Background
CATCGGGAGTGTACCT_19	Background
CATCGGGCAAGTCTGT_19	Background
CATCGGGCATATGAGA_20	Background
CATCGGGGTACTCTCC_20	Background
CATCGGGGTTTGACTG_15	Background
CATCGGGTCAACCATG_20	Background
CATCGGGTCCAGATCA_20	Background
CATCGGGTCTGGGCCA_19	Background
CATCGGGTCTTGGGTA_19	Background
CATGACAAGAGCTGCA_20	Background
CATGACACAAGGCTCC_19	Background
CATGACACACGCCAGT_20	Background
CATGACACATGCCTTC_20	Background
CATGACAGTAGAGCTG_19	Background
CATGACATCAACCAAC_14	Background
CATGACATCGCTGATA_20	Background
CATGACATCTTACCGC_16	Background
CATGCCTAGAGCTTCT_19	Background
CATGCCTCAAATACAG_19	Background
CATGCCTCACACATGT_20	Background
CATGCCTCACCCAGTG_14	Background
CATGCCTTCCGCGTTT_20	Background
CATGCCTTCGGCGCAT_16	Background
CATGCCTTCTACGAGT_20	Background
CATGGCGAGAGTGACC_13	Background
CATGGCGAGATACACA_13	Background
CATGGCGAGCTAACTC_15	Background
CATGGCGGTCTAAACC_20	Background
CATGGCGGTGTGGTTT_20	Background
CATGGCGTCGACGGAA_20	Background
CATTATCCACAGGTTT_19	Background
CATTATCGTATTCTCT_20	Background
CATTATCGTCTACCTC_13	Background
CATTATCGTTTGACTG_15	Background
CATTATCTCAATCTCT_20	Background
CATTATCTCCACGACG_18	Background
CATTATCTCGCCTGTT_15	Background
CATTCGCAGATATACG_18	High-Risk
CATTCGCAGATCCTGT_16	Background
CATTCGCAGGCGCTCT_14	Background
CATTCGCGTACGCTGC_20	Background
CATTCGCGTATAGGGC_14	Background
CATTCGCGTCAGCTAT_13	Background
CATTCGCGTCCTCCAT_19	Background
CATTCGCTCACGATGT_20	Background
CATTCGCTCCTATTCA_18	Background
CATTCGCTCGTCGTTC_13	Background
CATTCGCTCTCACATT_19	Background
CCAATCCGTCTCATCC_19	Background
CCAATCCTCAGAGGTG_20	Background
CCAATCCTCATCGCTC_20	Background
CCAATCCTCTACCAGA_15	Background
CCACCTACATGATCCA_20	Background
CCACCTAGTCCAGTAT_18	Background
CCACCTAGTCTGCGGT_19	Background
CCACCTATCCCTTGTG_15	Background
CCACCTATCGTATCAG_20	Background
CCACGGAAGACAGGCT_15	Background
CCACGGACACGCCAGT_14	Background
CCACGGACACGCCAGT_15	Background
CCACGGAGTCTCTTTA_19	Background
CCACGGAGTGAGGCTA_14	Background
CCACGGAGTGTCCTCT_20	Background
CCACGGAGTTCTGTTT_20	Background
CCACGGATCATCACCC_20	Background
CCACGGATCCATGCTC_15	Background
CCACGGATCCCTCTTT_20	Background
CCACGGATCGTATCAG_20	Background
CCACGGATCGTGTAGT_13	Background
CCACTACAGACTTTCG_18	Background
CCACTACAGAGGTACC_19	Background
CCACTACAGTGACATA_14	Background
CCACTACCAACTGCGC_20	Background
CCACTACCAGCCACCA_19	Background
CCACTACCATTCTCAT_20	Background
CCACTACGTACCTACA_15	Background
CCACTACGTGAAGGCT_20	Background
CCACTACGTGTTCGAT_20	Background
CCACTACGTTCACCTC_20	Background
CCACTACTCCTGTAGA_18	Background
CCACTACTCGTTACAG_19	Background
CCAGCGAAGCCATCGC_16	Background
CCAGCGAAGCGTTCCG_19	Background
CCAGCGAAGTATGACA_14	Background
CCAGCGACAAATCCGT_20	Background
CCAGCGACACATGTGT_18	Background
CCAGCGAGTATAGTAG_19	High-Risk
CCAGCGAGTCGCTTCT_20	Background
CCAGCGAGTTATGTGC_20	Background
CCAGCGAGTTTGGGCC_20	Background
CCAGCGATCCAAAGTC_20	Background
CCATGTCAGAAACCGC_19	Background
CCATGTCAGGACACCA_20	Background
CCATGTCAGGTGACCA_20	Background
CCATGTCAGTCACGCC_20	Background
CCATGTCAGTCCTCCT_20	Background
CCATGTCAGTGTGAAT_19	Background
CCATGTCCAATAGCAA_14	Background
CCATGTCGTCTCTCTG_15	Background
CCATGTCGTGCTGTAT_15	Background
CCATGTCGTTAGAACA_19	Background
CCATGTCTCACGCGGT_15	Background
CCATGTCTCCTCTAGC_19	Background
CCATTCGAGACACTAA_15	Background
CCATTCGAGCAGCGTA_13	Background
CCATTCGAGGGAACGG_14	Background
CCATTCGAGGTGACCA_13	Background
CCATTCGAGGTGACCA_14	Background
CCATTCGCAACTGCTA_15	Background
CCATTCGCAAGTAATG_20	Background
CCATTCGCACGGTGTC_15	Background
CCATTCGCAGGCTGAA_20	Background
CCATTCGTCTACTCAT_19	Background
CCATTCGTCTCCCTGA_19	Background
CCCAATCAGGTGATAT_20	Background
CCCAATCAGTGTTTGC_15	Background
CCCAATCCAGCATACT_19	Background
CCCAATCGTACTTAGC_15	Background
CCCAATCGTCATCCCT_13	Background
CCCAATCGTCGGCACT_15	Background
CCCAATCTCTTTAGGG_19	Background
CCCAGTTAGACTTGAA_14	Background
CCCAGTTAGGTAAACT_19	Background
CCCAGTTAGTACGCGA_15	Background
CCCAGTTAGTGACTCT_20	Background
CCCAGTTCATCGGGTC_20	Background
CCCAGTTGTCCCTACT_14	Background
CCCAGTTGTTAAGAAC_19	Background
CCCAGTTTCCCTTGCA_15	Background
CCCATACAGTCCCACG_18	Background
CCCATACCAATCGGTT_19	Background
CCCATACCACGAAGCA_19	Background
CCCATACGTCTAAAGA_19	Background
CCCATACGTCTAACGT_14	High-Risk
CCCATACGTCTCAACA_20	Background
CCCATACGTGGTCTCG_14	Background
CCCATACTCAGCTCGG_18	Background
CCCTCCTAGCTATGCT_19	Background
CCCTCCTCAAGCGCTC_19	Background
CCCTCCTGTCTGGTCG_15	Background
CCCTCCTTCAACGCTA_15	Background
CCCTCCTTCGGCTACG_13	Background
CCGGGATAGAGTAATC_19	Background
CCGGGATAGATATGCA_20	Background
CCGGGATAGTCGAGTG_20	Background
CCGGGATCAACTGCTA_19	Background
CCGGGATCAAGCCCAC_20	Background
CCGGGATCAGACGCCT_15	Background
CCGGGATCAGACGCTC_14	Background
CCGGGATGTACAAGTA_20	Background
CCGGGATGTCCAGTAT_18	Background
CCGGGATGTTACGACT_20	Background
CCGGGATGTTTGCATG_20	Background
CCGGTAGAGAAACCTA_20	Background
CCGGTAGAGCACCGTC_19	Background
CCGGTAGCACCCATTC_19	Background
CCGGTAGGTACCCAAT_15	Background
CCGGTAGGTCATTAGC_20	Background
CCGGTAGTCGGTCTAA_19	Background
CCGTACTAGAGTAAGG_19	Background
CCGTACTAGCACACAG_20	Background
CCGTACTCAATGGAGC_19	Background
CCGTACTCACAAGTAA_13	Background
CCGTACTCACAAGTAA_14	Background
CCGTACTCACCATGTA_20	Background
CCGTACTCAGTCGATT_14	Background
CCGTACTCATCATCCC_15	Background
CCGTACTGTCGCCATG_20	Background
CCGTACTGTGATAAGT_20	Background
CCGTACTGTTTAGGAA_13	Background
CCGTGGAAGAAGATTC_20	Background
CCGTGGAAGCCACGTC_13	Background
CCGTGGACAATAAGCA_19	Background
CCGTGGACATAGGATA_18	Background
CCGTGGACATGCCCGA_19	Background
CCGTGGAGTACCCAAT_14	Background
CCGTGGAGTATATCCG_16	Background
CCGTGGAGTTAGGGTG_13	Background
CCGTGGAGTTAGGGTG_14	Background
CCGTGGAGTTCCACAA_19	Background
CCGTGGATCAAAGACA_15	High-Risk
CCGTGGATCTGGCGTG_19	High-Risk
CCGTTCAAGACAATAC_20	Background
CCGTTCAAGAGCTGCA_20	Background
CCGTTCAAGGCAATTA_14	Background
CCGTTCAAGGCTACGA_19	Background
CCGTTCAAGTAGATGT_19	Background
CCGTTCAGTCACCTAA_20	Background
CCGTTCATCACATAGC_20	Background
CCGTTCATCCGCAGTG_20	Background
CCGTTCATCCTAGTGA_20	Background
CCGTTCATCGATCCCT_20	Background
CCGTTCATCGCCGTGA_13	Background
CCGTTCATCGCCGTGA_14	Background
CCTAAAGAGCAGGTCA_20	Background
CCTAAAGAGTAATCCC_20	Background
CCTAAAGAGTGTGAAT_18	Background
CCTAAAGCACTTAAGC_14	Background
CCTAAAGGTAGAGCTG_19	Background
CCTAAAGGTTTCCACC_15	Background
CCTAAAGTCCTTTCGG_13	Background
CCTAAAGTCCTTTCGG_14	Background
CCTAAAGTCTACTTAC_20	High-Risk
CCTACACAGAACTCGG_15	Background
CCTACACAGACTAGGC_13	Background
CCTACACAGAGCCTAG_19	Background
CCTACACAGAGGTTAT_20	Background
CCTACACAGCCGCCTA_15	Background
CCTACACAGGAGCGTT_15	Background
CCTACACAGTGACATA_19	Background
CCTACACCACCATGTA_20	Background
CCTACACCACCCATGG_15	Background
CCTACACCACCCATGG_16	Background
CCTACACGTGTCGCTG_20	Background
CCTACACGTTGACGTT_14	Background
CCTACACGTTGACGTT_15	Background
CCTACACTCCGTTGTC_15	Background
CCTACCAAGCCAGAAC_19	Background
CCTACCAAGGAGCGAG_15	Background
CCTACCAAGTAGCGGT_20	Background
CCTACCACAAACTGCT_20	Background
CCTACCACAGCTTAAC_20	Background
CCTACCACATGCTGGC_20	Background
CCTACCAGTCCAGTAT_20	Background
CCTACCAGTCTTCGTC_18	Background
CCTACCAGTTCTGTTT_20	Background
CCTACCAGTTTGACAC_14	Background
CCTACCATCCAACCAA_14	Background
CCTACCATCTTAACCT_19	Background
CCTACCATCTTCGAGA_20	Background
CCTAGCTAGACAGAGA_18	Background
CCTAGCTCAGCCTTTC_14	Background
CCTAGCTGTACAGTGG_20	Background
CCTAGCTGTCCTGCTT_18	High-Risk
CCTAGCTGTGATAAGT_15	Background
CCTAGCTGTGTGGCTC_13	Background
CCTAGCTGTTCTGTTT_13	Background
CCTAGCTGTTGATTGC_20	Background
CCTAGCTTCCAAGTAC_14	Background
CCTAGCTTCCAAGTAC_15	Background
CCTATTACAAAGAATC_19	Background
CCTATTACACCAGGCT_18	Background
CCTATTAGTATTCTCT_16	Background
CCTATTAGTTACGCGC_20	Background
CCTATTATCATAAAGG_15	Background
CCTCAGTAGCCGTCGT_19	Background
CCTCAGTAGGGCTTGA_19	Background
CCTCAGTCACCGTTGG_15	Background
CCTCAGTTCAAGATCC_19	Background
CCTCAGTTCATCTGTT_20	Background
CCTCTGAAGCAGCCTC_20	Background
CCTCTGAAGCTGAAAT_20	Background
CCTCTGAAGTCAAGGC_20	Background
CCTCTGAAGTTCGCAT_19	Background
CCTCTGAGTATGGTTC_20	Background
CCTCTGAGTGTCCTCT_20	Background
CCTCTGAGTTCCTCCA_19	Background
CCTCTGATCAGCTTAG_14	Background
CCTCTGATCTGTACGA_20	Background
CCTTACGAGGGCATGT_14	Background
CCTTACGAGTCGCCGT_19	Background
CCTTACGCAGGCTGAA_20	Background
CCTTACGGTGAGTGAC_13	Background
CCTTACGTCTCTGAGA_19	Background
CCTTCCCAGAGTAATC_20	Background
CCTTCCCAGATCTGAA_18	High-Risk
CCTTCCCCAATCAGAA_18	Background
CCTTCCCCACTCTGTC_19	Background
CCTTCCCTCCAAACAC_20	Background
CCTTCCCTCCAGATCA_13	Background
CCTTCCCTCGATCCCT_20	Background
CCTTCCCTCGTGGACC_19	Background
CCTTCCCTCTGTCTAT_14	Background
CCTTCGAAGGAGTTGC_15	Background
CCTTCGACACATTTCT_14	Background
CCTTCGACACCATCCT_18	Background
CCTTCGACAGTAAGCG_19	Background
CCTTCGAGTCCATGAT_16	Background
CCTTCGATCGAATGGG_20	Background
CCTTCGATCGGTCTAA_13	High-Risk
CCTTCGATCTGACCTC_20	Background
CCTTCGATCTTCCTTC_20	Background
CCTTTCTAGACAGAGA_18	Background
CCTTTCTAGAGTAAGG_19	Background
CCTTTCTAGCACCGCT_19	Background
CCTTTCTAGTTTGCGT_20	Background
CCTTTCTCAAGACACG_15	Background
CCTTTCTCACCTGGTG_14	Background
CCTTTCTGTAGCAAAT_19	Background
CCTTTCTGTCTAGTCA_14	Background
CCTTTCTGTTACGCGC_20	Background
CCTTTCTTCAAACCGT_15	Background
CCTTTCTTCACGCATA_20	Background
CCTTTCTTCCCATTAT_20	Background
CCTTTCTTCTCCGGTT_20	Background
CCTTTCTTCTGGCGAC_20	Background
CGAACATAGCTCAACT_15	Background
CGAACATCAGATCTGT_20	Background
CGAACATCAGTATGCT_20	Background
CGAACATCATGCAACT_20	Background
CGAACATCATGTAAGA_20	Background
CGAACATGTACCGTAT_18	Background
CGAACATGTATAATGG_19	Background
CGAACATTCGGTCTAA_20	Background
CGAACATTCGTCCAGG_20	Background
CGAATGTAGACTAGGC_15	Background
CGAATGTAGTGACATA_20	Background
CGAATGTCATACAGCT_19	Background
CGAATGTCATATGAGA_19	Background
CGAATGTGTCAGCTAT_20	Background
CGAATGTGTTCGTGAT_15	Background
CGAATGTTCAACGCTA_15	Background
CGAATGTTCAATAAGG_19	Background
CGACCTTAGATCCCGC_20	Background
CGACCTTAGCACACAG_13	Background
CGACCTTAGCACACAG_14	Background
CGACCTTAGTGAATTG_20	Background
CGACCTTCACCCTATC_20	Background
CGACCTTCACCTGGTG_20	Background
CGACCTTCATAGTAAG_20	Background
CGACCTTGTCTCGTTC_15	Background
CGACCTTGTGTTGAGG_13	High-Risk
CGACCTTGTTAAGAAC_20	Background
CGACCTTGTTTAGCTG_19	Background
CGACTTCAGCGATATA_20	Background
CGACTTCAGGTGCAAC_14	Background
CGACTTCCACTGTGTA_20	Background
CGACTTCCAGGGTTAG_14	Background
CGACTTCCAGTATCTG_20	Background
CGACTTCTCAGGCGAA_19	High-Risk
CGACTTCTCTGGCGTG_19	Background
CGAGAAGAGGAGTAGA_19	Background
CGAGAAGAGTCCAGGA_13	Background
CGAGAAGAGTGAAGAG_20	Background
CGAGAAGAGTGGGATC_18	Background
CGAGAAGCACAACGCC_19	Background
CGAGAAGCACATCTTT_16	Background
CGAGAAGGTACCGAGA_19	Background
CGAGAAGGTCCATGAT_20	Background
CGAGAAGTCACGCGGT_13	Background
CGAGAAGTCCACGCAG_20	Background
CGAGAAGTCGTAGGAG_14	High-Risk
CGAGAAGTCGTTGACA_18	Background
CGAGCACAGCAGGCTA_20	Background
CGAGCACAGGGAGTAA_20	Background
CGAGCACAGTTTAGGA_20	Background
CGAGCACCAAATACAG_16	Background
CGAGCACGTCTCTCTG_14	Background
CGAGCACGTTGGTTTG_14	Background
CGAGCACTCACATACG_18	Background
CGAGCACTCGTTGACA_18	Background
CGAGCCAAGAACTGTA_20	Background
CGAGCCAAGCGATCCC_20	Background
CGAGCCAAGCGATGAC_20	Background
CGAGCCACAGAAGCAC_13	Background
CGAGCCACAGAAGCAC_14	Background
CGAGCCACAGTTAACC_15	Background
CGAGCCAGTCGAATCT_20	Background
CGAGCCAGTCGCTTCT_18	Background
CGAGCCAGTTAGGGTG_18	Background
CGAGCCATCAACACTG_16	Background
CGATCGGAGCTAGTTC_18	Background
CGATCGGAGGGAGTAA_13	Background
CGATCGGAGGGAGTAA_14	Background
CGATCGGCAATCCAAC_13	Background
CGATCGGGTCGATTGT_19	Background
CGATCGGGTGTGACCC_19	Background
CGATCGGGTTGTCGCG_20	Background
CGATCGGTCGAGCCCA_19	Background
CGATGGCAGCGATATA_18	Background
CGATGGCAGGGTTTCT_20	Background
CGATGGCCACAACGTT_19	Background
CGATGGCCACATTTCT_19	Background
CGATGGCCACGGTAAG_13	Background
CGATGGCGTAAGTTCC_18	Background
CGATGGCGTCCGTTAA_20	Background
CGATGGCGTGAAATCA_15	Background
CGATGGCGTGATGTGG_20	Background
CGATGGCTCGTCACGG_19	Background
CGATGTAAGGAATTAC_15	Background
CGATGTAAGTAGCGGT_13	Background
CGATGTACATGCGCAC_14	Background
CGATGTACATTCTTAC_15	Background
CGATGTAGTCCGCTGA_19	Background
CGATGTAGTCTAGTGT_14	Background
CGATGTAGTTGAGTTC_13	Background
CGATGTATCTCAAACG_18	Background
CGATTGACAATTGCTG_19	Background
CGATTGATCAACGCTA_20	Background
CGATTGATCGCGTAGC_19	Background
CGATTGATCGTACGGC_15	Background
CGCCAAGAGCGTGAAC_15	High-Risk
CGCCAAGAGGAATTAC_19	Background
CGCCAAGCAAGAGGCT_19	Background
CGCCAAGCAAGCCATT_13	Background
CGCCAAGCAGTAGAGC_20	Background
CGCCAAGGTCGCATCG_19	Background
CGCCAAGGTCTCCCTA_19	Background
CGCCAAGGTTGTGGAG_14	Background
CGCCAAGTCATGTGGT_20	Background
CGCGGTAAGTCTCGGC_20	Background
CGCGGTAAGTTCCACA_15	Background
CGCGGTAAGTTGCAGG_19	Background
CGCGGTAAGTTTAGGA_20	Background
CGCGGTACACGACGAA_13	Background
CGCGGTACATCTACGA_20	Background
CGCGGTAGTTAAAGAC_18	Background
CGCGGTATCATGCATG_14	Background
CGCGGTATCCGCTGTT_20	High-Risk
CGCGGTATCCGTTGCT_13	Background
CGCGGTATCGCGTTTC_18	Background
CGCGTTTAGACTAGGC_19	Background
CGCGTTTAGATCGATA_18	Background
CGCGTTTAGTGAACAT_13	Background
CGCGTTTGTAAAGTCA_20	Background
CGCGTTTGTCGAATCT_20	Background
CGCGTTTTCTGTTGAG_19	Background
CGCTATCAGACGCAAC_13	Background
CGCTATCCAAATCCGT_19	Background
CGCTGGACATACTCTT_20	Background
CGCTGGACATCTATGG_19	Background
CGCTGGAGTCGCGGTT_19	Background
CGCTGGATCAAACAAG_15	Background
CGCTGGATCGTCCAGG_15	Background
CGCTTCAAGCTGAACG_14	Background
CGCTTCAAGGACCACA_20	Background
CGCTTCAAGTAATCCC_20	Background
CGCTTCACAGGAACGT_20	Background
CGCTTCACATCGGTTA_13	Background
CGCTTCACATCGGTTA_14	Background
CGCTTCACATTCACTT_20	Background
CGCTTCAGTACCTACA_15	Background
CGCTTCAGTACGCTGC_20	Background
CGCTTCAGTCTAGCCG_15	Background
CGCTTCAGTCTCACCT_19	Background
CGCTTCAGTGAAAGAG_19	High-Risk
CGCTTCAGTTACCAGT_18	Background
CGCTTCATCACAGGCC_20	Background
CGCTTCATCGCTTGTC_18	Background
CGGACACAGCCTTGAT_13	Background
CGGACACCAAACAACA_14	Background
CGGACACCAGACGCCT_20	Background
CGGACACCATACTACG_20	Background
CGGACACGTAATTGGA_18	High-Risk
CGGACACGTTCCAACA_20	Background
CGGACGTAGGAGTTGC_20	Background
CGGACGTAGTCACGCC_18	Background
CGGACGTCACGTAAGG_19	Background
CGGACGTCACTATCTT_15	Background
CGGACGTCAGATAATG_20	Background
CGGACGTCATCCCATC_14	Background
CGGACGTCATGAAGTA_20	Background
CGGACGTGTTCTGAAC_20	Background
CGGACGTTCATGCAAC_13	Background
CGGACTGCACGCCAGT_14	Background
CGGACTGCAGTTTACG_20	Background
CGGACTGGTAAACCTC_13	Background
CGGACTGGTACCCAAT_13	Background
CGGACTGGTAGAGCTG_18	Background
CGGACTGGTCCGTGAC_14	Background
CGGACTGGTCGGCACT_20	Background
CGGACTGTCAACTCTT_20	Background
CGGACTGTCGCCATAA_19	Background
CGGACTGTCTGTCTCG_20	Background
CGGACTGTCTTACCGC_18	Background
CGGAGCTCACGGCTAC_20	Background
CGGAGCTCAGCCTGTG_15	Background
CGGAGCTGTACGCACC_20	Background
CGGAGCTGTACTCGCG_19	Background
CGGAGCTGTATAAACG_20	Background
CGGAGCTTCATCACCC_19	Background
CGGAGCTTCATCTGTT_15	Background
CGGAGCTTCTCGGACG_18	Background
CGGAGTCCACGGATAG_19	Background
CGGAGTCCAGGGATTG_20	Background
CGGAGTCGTCGGGTCT_20	Background
CGGAGTCGTTAAGACA_19	Background
CGGAGTCTCACCATAG_20	High-Risk
CGGAGTCTCGCTTAGA_15	Background
CGGCTAGAGAGCTGGT_19	High-Risk
CGGCTAGAGCCGATTT_18	Background
CGGCTAGAGGAATTAC_18	Background
CGGCTAGAGGGATACC_15	Background
CGGCTAGAGTTCCACA_13	Background
CGGCTAGCAGGTGCCT_20	Background
CGGCTAGGTAATTGGA_18	Background
CGGCTAGGTGAGCGAT_20	Background
CGGCTAGGTTTGACTG_20	Background
CGGCTAGTCATCGATG_20	High-Risk
CGGCTAGTCCAGGGCT_19	Background
CGGGTCAAGACCTAGG_19	Background
CGGGTCAAGGGTTCCC_19	Background
CGGGTCAAGTTAGCGG_20	Background
CGGGTCACAGACGTAG_19	Background
CGGGTCACAGAGTGTG_15	Background
CGGGTCACAGCGAACA_19	Background
CGGGTCACAGCTGCAC_19	High-Risk
CGGGTCACATCCTTGC_19	Background
CGGGTCAGTCTTGATG_19	Background
CGGGTCAGTTGCCTCT_14	Background
CGGGTCATCGCTTAGA_20	Background
CGGGTCATCTCTAAGG_19	Background
CGGGTCATCTGCCAGG_18	Background
CGGTTAACAAAGCGGT_20	Background
CGGTTAACAACTTGAC_19	Background
CGGTTAACACCGAAAG_13	Background
CGGTTAACAGCCTGTG_20	Background
CGGTTAACATACTCTT_20	Background
CGGTTAAGTAACGTTC_13	Background
CGGTTAAGTATAGGGC_20	Background
CGGTTAAGTCGACTAT_13	Background
CGGTTAAGTCTGATTG_19	Background
CGTAGCGAGAATCTCC_19	Background
CGTAGCGAGCAGACTG_20	Background
CGTAGCGAGGAATCGC_20	Background
CGTAGCGCATTATCTC_19	Background
CGTAGCGGTGTTGAGG_16	Background
CGTAGCGTCCTGCCAT_20	Background
CGTAGCGTCGCAAGCC_13	Background
CGTAGGCCATCGGAAG_19	Background
CGTAGGCCATTTCAGG_20	Background
CGTAGGCTCAACTCTT_19	Background
CGTAGGCTCCTCATTA_15	Background
CGTCACTAGCTAGGCA_20	Background
CGTCACTAGGGAAACA_15	Background
CGTCACTAGTGGAGTC_19	High-Risk
CGTCACTCAGGCTGAA_15	Background
CGTCACTGTAAGCACG_20	Background
CGTCACTGTAGAGCTG_15	Background
CGTCACTGTCGCGAAA_19	Background
CGTCACTGTGGCAAAC_14	Background
CGTCACTGTTGGGACA_20	Background
CGTCAGGAGACAGGCT_18	Background
CGTCAGGAGCGTAGTG_15	Background
CGTCAGGAGGCCGAAT_15	Background
CGTCAGGAGGTTACCT_19	Background
CGTCAGGCAGGTGCCT_20	Background
CGTCAGGGTAGAAGGA_15	Background
CGTCAGGGTCGAGATG_19	High-Risk
CGTCAGGGTCTCGTTC_13	Background
CGTCAGGGTCTCGTTC_14	Background
CGTCCATAGAGGTTGC_20	Background
CGTCCATAGGGATGGG_20	Background
CGTCCATCAAGACGTG_20	Background
CGTCCATCACCGATAT_19	Background
CGTCCATTCACTGGGC_20	Background
CGTCCATTCGGCGCTA_20	High-Risk
CGTCTACAGCTGGAAC_20	Background
CGTCTACAGGTGTTAA_19	Background
CGTCTACCAATTGCTG_20	Background
CGTCTACCATCCCACT_20	Background
CGTCTACGTCATGCAT_19	Background
CGTCTACTCATGTCTT_19	Background
CGTGAGCAGAGTCGGT_15	Background
CGTGAGCAGTGAATTG_16	Background
CGTGAGCCAATGACCT_16	Background
CGTGAGCGTACATCCA_20	Background
CGTGAGCGTATAGGTA_20	Background
CGTGAGCTCGAACGGA_20	Background
CGTGTAAAGATATGCA_20	Background
CGTGTAAAGCGTGAGT_20	Background
CGTGTAACACAGAGGT_19	Background
CGTGTAACAGTACACT_15	Background
CGTGTCTAGAAAGTGG_14	Background
CGTGTCTAGGCATGTG_15	Background
CGTGTCTAGTTGAGAT_13	Background
CGTGTCTCACCGGAAA_14	Background
CGTGTCTCAGATAATG_19	Background
CGTGTCTCAGTCCTTC_15	Background
CGTGTCTGTAAGAGAG_19	Background
CGTGTCTTCCACTCCA_16	Background
CGTTAGACAAGCTGAG_20	High-Risk
CGTTAGACATCACGAT_20	Background
CGTTCTGAGTCCCACG_18	Background
CGTTCTGAGTGAACAT_14	Background
CGTTCTGAGTGTTGAA_15	Background
CGTTCTGCATGCCCGA_19	Background
CGTTCTGGTAGTGAAT_13	Background
CGTTCTGGTAGTGAAT_14	Background
CGTTCTGGTCTAGTCA_19	Background
CGTTCTGGTCTCATCC_13	Background
CGTTCTGTCACGATGT_15	Background
CGTTCTGTCGAGGTAG_18	Background
CGTTCTGTCGCCGTGA_14	Background
CGTTGGGAGGAGTTTA_20	Background
CGTTGGGAGGATGGAA_15	Background
CGTTGGGAGGCGCTCT_19	Background
CGTTGGGCAGTCAGAG_20	Background
CGTTGGGCATATACGC_19	Background
CGTTGGGTCCACGCAG_20	Background
CGTTGGGTCGAACGGA_18	Background
CGTTGGGTCTTTACAC_13	Background
CTAACTTAGAGGTTAT_15	Background
CTAACTTAGCTGAACG_20	Background
CTAACTTAGGGATGGG_15	Background
CTAACTTGTAGCTAAA_20	Background
CTAACTTTCAGTACGT_20	Background
CTAAGACAGAGGACGG_19	Background
CTAAGACAGCGTAGTG_15	Background
CTAAGACAGGATGTAT_15	Background
CTAAGACGTATATGGA_15	Background
CTAAGACGTGCGGTAA_20	Background
CTAAGACGTTCGTGAT_20	Background
CTAAGACTCAACGCTA_20	Background
CTAAGACTCACTCCTG_14	Background
CTAAGACTCCGAGCCA_20	Background
CTAAGACTCGTTGACA_19	Background
CTAATGGAGAGGGATA_20	Background
CTAATGGAGGAATGGA_13	Background
CTAATGGAGGCACATG_15	Background
CTAATGGAGTGTGGCA_13	Background
CTAATGGCAGGCTCAC_15	Background
CTAATGGGTATCGCAT_15	Background
CTAATGGGTATGAATG_20	Background
CTAATGGGTTAGATGA_14	Background
CTAATGGTCGAGGTAG_20	Background
CTAATGGTCGTAGGTT_13	Background
CTAATGGTCGTTTGCC_19	Background
CTACACCAGCCAGGAT_13	Background
CTACACCAGCTAGCCC_13	Background
CTACACCGTGGTAACG_20	Background
CTACACCTCAGCAACT_16	Background
CTACATTAGTGGGCTA_20	Background
CTACATTCAATCCAAC_18	Background
CTACATTCAGGAATGC_15	Background
CTACATTTCCTTTACA_13	Background
CTACATTTCTACTTAC_18	Background
CTACATTTCTTGTCAT_19	Background
CTACCCAAGTAGCCGA_20	Background
CTACCCACACCAGATT_13	Background
CTACCCACACCAGATT_14	Background
CTACCCACACCATCCT_19	Background
CTACCCACAGATCGGA_20	Background
CTACCCAGTATAGTAG_20	Background
CTACCCAGTGTGTGCC_20	Background
CTACCCAGTTTAAGCC_20	Background
CTACCCATCAACCAAC_20	Background
CTACCCATCCAGGGCT_20	Background
CTACGTCAGACGCAAC_19	Background
CTACGTCAGCCATCGC_20	Background
CTACGTCAGCCCTAAT_14	Background
CTACGTCAGCCCTAAT_20	Background
CTACGTCAGGACTGGT_20	Background
CTACGTCCACAGTCGC_15	Background
CTACGTCCATCGGTTA_20	Background
CTACGTCGTAGATTAG_18	Background
CTACGTCGTAGGAGTC_20	Background
CTACGTCGTCTAGAGG_15	Background
CTACGTCTCGGTGTTA_18	Background
CTACGTCTCGTACGGC_13	Background
CTACGTCTCGTACGGC_14	Background
CTACGTCTCTAGCACA_15	Background
CTAGAGTAGCAGATCG_20	High-Risk
CTAGAGTAGGCTAGAC_19	Background
CTAGAGTAGGTAGCTG_18	Background
CTAGAGTGTCAAACTC_19	Background
CTAGAGTTCATTTGGG_16	Background
CTAGAGTTCCCGGATG_14	Background
CTAGAGTTCCGCATCT_14	Background
CTAGAGTTCGTTTAGG_15	Background
CTAGCCTAGACACGAC_20	Background
CTAGCCTAGGAGTACC_19	Background
CTAGCCTAGGTGCACA_20	Background
CTAGCCTCAAGGACTG_19	Background
CTAGCCTCAAGGGTCA_15	Background
CTAGCCTCAGGCGATA_20	Background
CTAGCCTCATGGTCTA_13	Background
CTAGCCTGTAGCTAAA_19	Background
CTAGCCTGTCAGATAA_20	Background
CTAGCCTGTTCTGTTT_20	Background
CTAGCCTTCACATAGC_19	Background
CTAGCCTTCTGCGGCA_19	Background
CTAGCCTTCTTGCAAG_20	Background
CTAGTGAAGACTAAGT_13	Background
CTAGTGAAGACTAAGT_14	Background
CTAGTGAGTAGCCTCG_19	Background
CTCACACAGTGACATA_13	Background
CTCACACCACCAGCAC_20	Background
CTCACACCATCGATTG_19	Background
CTCACACGTCATATGC_20	Background
CTCACACTCAACGGCC_13	Background
CTCACACTCCCTCTTT_13	Background
CTCAGAAAGCGCCTTG_20	Background
CTCAGAAAGGATGGAA_14	Background
CTCAGAAAGGCAGTCA_19	Background
CTCAGAACAATCAGAA_14	Background
CTCAGAAGTACAGACG_18	Background
CTCAGAAGTAGCAAAT_20	High-Risk
CTCAGAAGTCAAAGCG_15	Background
CTCAGAAGTCGCATCG_13	Background
CTCAGAAGTCGCATCG_14	Background
CTCAGAAGTGGGTCAA_19	Background
CTCAGAAGTTGATTGC_14	Background
CTCAGAAGTTGATTGC_15	Background
CTCAGAATCAGTCAGT_19	Background
CTCAGAATCTCGATGA_13	Background
CTCAGAATCTGTTGAG_19	Background
CTCATTAAGAGGTACC_18	Background
CTCATTACAGACACTT_19	Background
CTCATTACATCGGACC_20	Background
CTCATTAGTTCGTTGA_20	Background
CTCATTATCGCATGGC_20	Background
CTCCTAGAGTTAAGTG_20	Background
CTCCTAGCAAGAAGAG_19	Background
CTCCTAGCAGGCTGAA_18	High-Risk
CTCCTAGCATACTACG_20	Background
CTCCTAGGTCGCTTTC_20	Background
CTCCTAGGTCTCTTTA_19	Background
CTCCTAGGTCTTCGTC_20	Background
CTCCTAGTCAATCACG_13	Background
CTCCTAGTCACGATGT_19	High-Risk
CTCCTAGTCGTAGGTT_19	Background
CTCGAAAAGTGTACTC_20	High-Risk
CTCGAAACAAACTGCT_19	Background
CTCGAAACATCTACGA_14	Background
CTCGAAACATGCATGT_18	Background
CTCGAAAGTAAATGAC_19	Background
CTCGAAAGTAGCGATG_15	Background
CTCGAAAGTGCACGAA_20	Background
CTCGAAAGTGTGGCTC_15	Background
CTCGAAATCACATACG_14	Background
CTCGAAATCACTTATC_20	Background
CTCGAGGAGCAGCGTA_20	Background
CTCGAGGAGGTCATCT_20	Background
CTCGAGGCATCCTAGA_19	Background
CTCGAGGCATTGGCGC_20	Background
CTCGAGGGTTCCGGCA_18	Background
CTCGAGGGTTCGAATC_20	Background
CTCGAGGTCAGTGCAT_20	Background
CTCGAGGTCGATGAGG_19	Background
CTCGAGGTCTTGTACT_20	Background
CTCGGAGCAAGAGTCG_13	Background
CTCGGAGCACGCTTTC_14	Background
CTCGGAGCAGTCGATT_20	Background
CTCGGAGGTAAAGGAG_19	Background
CTCGGAGTCACATGCA_20	Background
CTCGGAGTCCGGCACA_20	High-Risk
CTCGGAGTCCTTGACC_20	Background
CTCGGAGTCTCCCTGA_20	Background
CTCGGGACACTTAACG_13	Background
CTCGGGAGTACTTCTT_13	Background
CTCGGGAGTCTTGATG_14	Background
CTCGGGATCGTCCGTT_20	Background
CTCGTACAGAACTGTA_19	Background
CTCGTACAGCGACGTA_20	Background
CTCGTACGTCGCGAAA_20	Background
CTCGTACGTTTGGCGC_19	Background
CTCGTACTCATCGATG_14	High-Risk
CTCGTACTCATCGATG_15	High-Risk
CTCGTACTCGCGTTTC_18	Background
CTCGTCAAGTGGGATC_13	Background
CTCGTCACAATGGAGC_20	Background
CTCGTCACACAGGCCT_20	Background
CTCGTCACACGTAAGG_19	Background
CTCGTCACAGTGACAG_13	Background
CTCGTCAGTACGACCC_15	Background
CTCGTCAGTCCAGTGC_19	Background
[truncated: 2,103 more rows]

## Sheet: 2. DEGAS Cell Labels
Cell	Label
AAACCTGAGACTACAA_15	Background
AAACCTGAGACTTGAA_20	Background
AAACCTGAGCGCCTTG_15	High-Risk
AAACCTGCAGCTATTG_19	Background
AAACCTGCAGTAAGCG_15	Background
AAACCTGGTGGCGAAT_20	Background
AAACCTGTCACCGGGT_20	Background
AAACGGGAGCAGACTG_19	Background
AAACGGGAGTCCATAC_19	High-Risk
AAACGGGAGTGCCATT_14	Background
AAACGGGCACTGCCAG_15	Background
AAACGGGGTACGACCC_19	Background
AAACGGGGTATATGGA_19	Background
AAACGGGTCACATACG_19	Background
AAACGGGTCTCGCTTG_14	High-Risk
AAACGGGTCTGCTGTC_20	Background
AAAGATGAGACTGGGT_19	Background
AAAGATGAGTGGGATC_19	Background
AAAGATGCACAGGCCT_19	Background
AAAGATGGTTTGTTGG_20	Background
AAAGCAAAGCTGTCTA_19	Background
AAAGCAAAGGCTCATT_19	High-Risk
AAAGCAACACCACCAG_16	Background
AAAGCAACATCGGGTC_15	Background
AAAGCAACATCGGTTA_20	Background
AAAGCAAGTACATGTC_20	Background
AAAGCAAGTTCGAATC_14	High-Risk
AAAGCAATCAACGAAA_15	High-Risk
AAAGTAGAGAATTGTG_20	Background
AAAGTAGAGGAGCGAG_19	Background
AAAGTAGAGTCAAGCG_20	Background
AAAGTAGAGTCCATAC_14	High-Risk
AAAGTAGAGTCCATAC_15	Background
AAAGTAGCAACTGCTA_18	Background
AAAGTAGCAAGCCTAT_19	Background
AAAGTAGGTAAGTTCC_20	Background
AAAGTAGGTCTAAACC_19	Background
AAAGTAGGTGTATGGG_18	Background
AAAGTAGTCATACGGT_18	High-Risk
AAAGTAGTCCACGACG_19	Background
AAAGTAGTCCCTAATT_14	Background
AAATGCCAGGACATTA_20	Background
AAATGCCCAAATACAG_15	Background
AAATGCCCACGTCAGC_13	Background
AAATGCCGTAGTAGTA_15	High-Risk
AAATGCCGTTGGAGGT_18	Background
AAATGCCTCAACGGGA_19	Background
AAATGCCTCAGTGTTG_18	Background
AAATGCCTCATATCGG_20	Background
AAATGCCTCCCGACTT_19	Background
AAATGCCTCCCTGACT_20	Background
AACACGTAGCTGAAAT_20	Background
AACACGTAGTAGGTGC_14	High-Risk
AACACGTCAACGCACC_19	Background
AACACGTCACATGGGA_15	Background
AACACGTCACGTCAGC_20	Background
AACACGTCAGTATAAG_14	Background
AACACGTGTACAGTTC_20	High-Risk
AACACGTGTCCGTGAC_19	Background
AACACGTGTCTAACGT_19	Background
AACACGTGTGATAAAC_15	High-Risk
AACACGTTCAGCAACT_18	Background
AACACGTTCGTACCGG_15	High-Risk
AACACGTTCTCGTTTA_15	Background
AACCATGCATCTCCCA_19	Background
AACCATGTCACGATGT_13	High-Risk
AACCATGTCACGATGT_14	High-Risk
AACCATGTCTTAGCCC_14	High-Risk
AACCATGTCTTAGCCC_15	High-Risk
AACCGCGAGCTGCGAA_20	Background
AACCGCGAGGACTGGT_18	Background
AACCGCGGTACCGTAT_15	Background
AACCGCGGTGACGGTA_14	High-Risk
AACCGCGTCCTCGCAT_19	Background
AACGTTGAGACGACGT_20	Background
AACGTTGAGATATACG_19	Background
AACGTTGAGCTTCGCG_19	Background
AACGTTGAGTATGACA_19	Background
AACGTTGAGTGTGAAT_19	High-Risk
AACGTTGAGTTGAGAT_20	Background
AACGTTGCAACCGCCA_19	High-Risk
AACGTTGCAAGCCCAC_14	Background
AACGTTGCAAGCCCAC_16	Background
AACGTTGCAAGGTTTC_20	High-Risk
AACGTTGCAATGTAAG_18	Background
AACGTTGCATTGGTAC_20	Background
AACGTTGTCGAATCCA_20	Background
AACTCAGAGAGTTGGC_20	Background
AACTCAGAGCAGACTG_13	Background
AACTCAGAGCAGACTG_14	Background
AACTCAGAGGGTGTTG_13	High-Risk
AACTCAGCAAGGTTTC_15	High-Risk
AACTCAGCACGAAACG_20	High-Risk
AACTCAGCATGGTTGT_19	High-Risk
AACTCAGCATTCGACA_13	High-Risk
AACTCAGGTGGTCCGT_20	Background
AACTCAGGTTCGGCAC_19	Background
AACTCAGGTTCGTCTC_13	High-Risk
AACTCAGGTTCGTCTC_14	Background
AACTCAGTCAGGATCT_13	High-Risk
AACTCAGTCCGCGGTA_19	Background
AACTCAGTCGAACTGT_16	Background
AACTCAGTCGGTCCGA_18	Background
AACTCCCAGCGCCTTG_19	Background
AACTCCCAGCTAGTCT_14	Background
AACTCCCAGCTCCCAG_14	High-Risk
AACTCCCAGGGTATCG_19	Background
AACTCCCCACCCAGTG_15	Background
AACTCCCCATATACCG_15	High-Risk
AACTCCCGTAATAGCA_20	High-Risk
AACTCCCGTAGCGCAA_20	Background
AACTCCCGTCAACTGT_20	High-Risk
AACTCCCGTCAGGACA_19	Background
AACTCCCTCCAGGGCT_20	High-Risk
AACTCCCTCTCTTATG_15	High-Risk
AACTCCCTCTGGTGTA_14	Background
AACTCTTAGAAACCGC_15	Background
AACTCTTAGAAACCGC_16	High-Risk
AACTCTTCACACCGAC_18	High-Risk
AACTCTTCATAACCTG_20	Background
AACTCTTGTCCAGTGC_19	Background
AACTCTTTCATAGCAC_18	Background
AACTCTTTCGAACTGT_20	Background
AACTGGTAGCGTCTAT_20	Background
AACTGGTAGGTGCAAC_20	Background
AACTGGTAGTAGATGT_19	Background
AACTGGTAGTAGGCCA_20	Background
AACTGGTCATTGGTAC_19	Background
AACTGGTGTCAGTGGA_15	Background
AACTGGTTCACATACG_19	Background
AACTGGTTCGGAGCAA_14	Background
AACTTTCAGCTAACAA_19	Background
AACTTTCAGTGGACGT_20	Background
AACTTTCTCCTAGAAC_20	Background
AACTTTCTCTTGTATC_15	Background
AAGACCTAGCGTTGCC_19	High-Risk
AAGACCTAGCTGCAAG_20	Background
AAGACCTCACCCTATC_20	Background
AAGACCTTCAAAGACA_20	High-Risk
AAGACCTTCGCAGGCT_13	Background
AAGACCTTCGCAGGCT_14	Background
AAGACCTTCTGAGTGT_14	Background
AAGCCGCAGTTTAGGA_20	Background
AAGCCGCCACTTAAGC_20	High-Risk
AAGCCGCGTTGGTAAA_14	Background
AAGCCGCGTTGTGGCC_13	Background
AAGCCGCGTTGTGGCC_14	Background
AAGCCGCTCCACGTTC_19	Background
AAGCCGCTCCGCGTTT_19	Background
AAGCCGCTCGCGCCAA_19	High-Risk
AAGCCGCTCTGCGGCA_20	Background
AAGGAGCCAATGGACG_19	Background
AAGGAGCGTCAGCTAT_13	Background
AAGGAGCGTCCTAGCG_20	Background
AAGGAGCGTTAAGATG_19	Background
AAGGAGCGTTATCGGT_13	Background
AAGGAGCGTTATCGGT_14	Background
AAGGAGCTCACGCGGT_19	High-Risk
AAGGAGCTCAGCTTAG_15	Background
AAGGAGCTCGGTTCGG_14	Background
AAGGAGCTCTACCTGC_20	Background
AAGGCAGAGGGTATCG_15	Background
AAGGCAGAGTACGCGA_20	Background
AAGGCAGCATGCCTAA_20	Background
AAGGCAGCATGGTTGT_19	High-Risk
AAGGCAGGTCCAACTA_20	Background
AAGGCAGGTGCTGTAT_20	Background
AAGGCAGGTGGTACAG_15	High-Risk
AAGGCAGGTTATGTGC_20	Background
AAGGCAGTCAACACCA_16	Background
AAGGTTCAGCTAGTTC_13	Background
AAGGTTCCACAGACAG_20	Background
AAGGTTCCACAGAGGT_19	Background
AAGGTTCCACGGTAAG_20	Background
AAGGTTCGTCCGAGTC_20	Background
AAGGTTCGTGAGCGAT_19	High-Risk
AAGTCTGAGAGGACGG_20	Background
AAGTCTGAGATATGGT_20	Background
AAGTCTGAGCTAGTTC_15	Background
AAGTCTGAGGTAGCCA_19	Background
AAGTCTGCACGAGAGT_13	Background
AAGTCTGCAGTCCTTC_20	Background
AAGTCTGCATAGGATA_19	Background
AAGTCTGTCCCGGATG_13	Background
AAGTCTGTCCCGGATG_14	Background
AAGTCTGTCTCGTTTA_14	High-Risk
AATCCAGAGCGAAGGG_14	Background
AATCCAGAGGCCATAG_18	Background
AATCCAGCAACAACCT_18	Background
AATCCAGCAGACAGGT_20	Background
AATCCAGGTTAAGGGC_19	Background
AATCCAGTCTGTCCGT_20	Background
AATCGGTAGCAAATCA_14	Background
AATCGGTAGCTGCCCA_15	Background
AATCGGTCAGGGTACA_15	High-Risk
AATCGGTCAGTAGAGC_15	Background
AATCGGTTCAGTTAGC_14	High-Risk
AATCGGTTCAGTTAGC_15	High-Risk
AATCGGTTCGAGCCCA_18	Background
AATCGGTTCGGGAGTA_19	Background
AATCGGTTCTCGCTTG_20	Background
ACACCAAAGCGATTCT_15	Background
ACACCAACAAGCCCAC_20	Background
ACACCAACACTAGTAC_18	Background
ACACCAACAGACGCCT_19	High-Risk
ACACCAAGTGCACGAA_20	Background
ACACCAATCATAGCAC_18	Background
ACACCAATCTACCTGC_15	Background
ACACCCTAGAATCTCC_13	Background
ACACCCTCATCAGTCA_13	Background
ACACCCTCATGATCCA_19	Background
ACACCCTCATGTAGTC_15	Background
ACACCCTGTCCATCCT_20	Background
ACACCCTGTTGCTCCT_15	Background
ACACCCTTCAAACCAC_14	Background
ACACCCTTCAGAGGTG_19	Background
ACACCCTTCCAAATGC_20	Background
ACACCCTTCTCTGCTG_14	Background
ACACCGGAGCTGTTCA_18	Background
ACACCGGCAGGCTCAC_20	Background
ACACCGGGTACAAGTA_20	Background
ACACTGAAGAACTGTA_20	Background
ACACTGAAGACTAAGT_20	Background
ACACTGAAGCCATCGC_13	Background
ACACTGAAGCCATCGC_14	Background
ACACTGAAGCGCTCCA_20	Background
ACACTGAAGCGTCTAT_20	Background
ACACTGAAGGAATTAC_19	Background
ACACTGAAGGTACTCT_20	Background
ACACTGACACCCATTC_19	Background
ACACTGACATCACAAC_19	Background
ACACTGACATCGGAAG_20	Background
ACACTGAGTAGCCTAT_18	High-Risk
ACACTGATCACCCTCA_16	Background
ACACTGATCAGTTAGC_19	Background
ACAGCCGAGAAACCAT_15	Background
ACAGCCGAGAATTCCC_15	Background
ACAGCCGAGGCCCGTT_15	Background
ACAGCCGCACAGACTT_18	Background
ACAGCCGCACGTTGGC_19	Background
ACAGCCGCATGTTGAC_15	High-Risk
ACAGCCGGTAAACCTC_19	Background
ACAGCCGGTTGCGCAC_15	Background
ACAGCCGTCATTATCC_20	Background
ACAGCTAAGATGAGAG_15	Background
ACAGCTAAGATTACCC_20	Background
ACAGCTAAGCTCCTTC_20	Background
ACAGCTAAGTGTTGAA_19	Background
ACAGCTACACAGCCCA_13	Background
ACAGCTACACAGCCCA_14	High-Risk
ACAGCTACATAGTAAG_20	High-Risk
ACAGCTACATTGCGGC_20	Background
ACAGCTAGTTGAGGTG_15	Background
ACAGCTATCCAGAAGG_19	Background
ACAGCTATCCTCCTAG_19	Background
ACAGCTATCGACAGCC_20	Background
ACAGCTATCGTTGACA_14	Background
ACAGCTATCTCAACTT_19	Background
ACAGCTATCTGATACG_20	Background
ACAGCTATCTTAACCT_20	Background
ACAGCTATCTTCTGGC_20	Background
ACATACGAGCGATATA_14	Background
ACATACGAGGACTGGT_14	Background
ACATACGAGGAGTCTG_15	Background
ACATACGAGGGTTTCT_20	Background
ACATACGAGTTAGGTA_18	Background
ACATACGCACGACGAA_20	Background
ACATACGGTACTTCTT_20	Background
ACATACGGTCTAGTGT_19	Background
ACATACGGTCTGCGGT_19	Background
ACATACGGTCTTCGTC_20	Background
ACATACGTCGTTGACA_20	Background
ACATCAGAGTACATGA_20	Background
ACATCAGCAGCCAGAA_20	Background
ACATCAGCATCATCCC_13	High-Risk
ACATGGTAGCTAGCCC_14	Background
ACATGGTAGGGTTTCT_19	Background
ACATGGTAGTAGGCCA_20	Background
ACATGGTAGTTTGCGT_20	Background
ACATGGTGTCGGATCC_15	Background
ACATGGTGTGGTGTAG_14	Background
ACATGGTTCTGTCTAT_19	Background
ACCAGTAAGACTTGAA_20	Background
ACCAGTAAGAGTACAT_19	Background
ACCAGTAAGGTAAACT_20	Background
ACCAGTAAGTTACGGG_20	Background
ACCAGTACAATGGAGC_18	Background
ACCAGTACAGGGTATG_13	Background
ACCAGTATCGTAGATC_13	High-Risk
ACCCACTAGGTAGCTG_19	High-Risk
ACCCACTAGTCAATAG_19	Background
ACCCACTCAGTGACAG_19	Background
ACCCACTCATGGGACA_19	Background
ACCCACTGTAATTGGA_19	Background
ACCCACTGTCCGTGAC_14	High-Risk
ACCCACTGTTCAGGCC_13	Background
ACCCACTTCCACGACG_15	Background
ACCCACTTCCTGCTTG_20	Background
ACCGTAAAGGCTAGAC_20	Background
ACCGTAAAGTAGTGCG_14	Background
ACCGTAAAGTGGAGAA_19	Background
ACCGTAACACGGCCAT_14	Background
ACCGTAAGTTGTACAC_13	Background
ACCGTAAGTTGTACAC_14	High-Risk
ACCGTAAGTTTGCATG_18	Background
ACCGTAATCACCCTCA_19	Background
ACCGTAATCAGCTCGG_20	Background
ACCGTAATCATAGCAC_20	Background
ACCTTTAAGACGCAAC_20	Background
ACCTTTAAGGTGTTAA_19	Background
ACCTTTACAAGCGCTC_15	Background
ACCTTTACACAACGCC_19	Background
ACCTTTACAGCATACT_20	Background
ACCTTTAGTGGTTTCA_20	Background
ACGAGCCCAACACCTA_20	Background
ACGAGCCGTCAGCTAT_15	Background
ACGAGCCGTCTAGGTT_19	Background
ACGAGCCTCCTTGACC_20	Background
ACGAGGAAGAGTAAGG_20	High-Risk
ACGAGGAAGTGGAGTC_20	Background
ACGAGGACAAGCCATT_20	Background
ACGAGGACACCAGGCT_20	Background
ACGAGGACAGTAAGAT_15	Background
ACGAGGACATTGGTAC_18	Background
ACGAGGAGTCAATGTC_20	Background
ACGAGGATCCCATTAT_20	Background
ACGAGGATCCTGCTTG_19	Background
ACGATACAGTCCGTAT_20	Background
ACGATACCATATACGC_20	Background
ACGATACGTAAGGATT_19	Background
ACGATACGTAATCGTC_19	Background
ACGATACGTCAGGACA_19	Background
ACGATACGTCCTCTTG_20	Background
ACGATACGTTATGCGT_14	High-Risk
ACGATACTCAAACCGT_19	Background
ACGATACTCACGCGGT_14	Background
ACGATACTCCGATATG_13	Background
ACGATACTCCGCATCT_18	Background
ACGATACTCCGTCATC_20	Background
ACGATACTCGAGAGCA_20	Background
ACGATGTCACTAAGTC_19	Background
ACGATGTGTCAAAGCG_20	Background
ACGATGTGTGCTCTTC_19	Background
ACGCAGCAGCACCGTC_19	Background
ACGCAGCAGGACAGCT_19	Background
ACGCAGCCAGGCTGAA_20	Background
ACGCAGCGTCGAGTTT_14	Background
ACGCAGCGTCTCTCGT_15	Background
ACGCAGCGTGTTTGTG_13	High-Risk
ACGCAGCGTGTTTGTG_14	Background
ACGCAGCGTTTGTTTC_19	Background
ACGCAGCTCTTACCTA_20	Background
ACGCCAGAGACACTAA_20	High-Risk
ACGCCAGAGAGGGATA_19	Background
ACGCCAGAGCAAATCA_19	Background
ACGCCAGGTCAGAAGC_20	Background
ACGCCAGTCAATACCG_19	High-Risk
ACGCCAGTCCTCCTAG_20	Background
ACGCCGAAGATGTGGC_19	Background
ACGCCGACATCGGACC_19	Background
ACGCCGAGTAAATGAC_20	Background
ACGGAGAAGACGCAAC_15	Background
ACGGAGAAGCCCGAAA_19	Background
ACGGAGAAGCTACCGC_19	Background
ACGGAGAAGGACAGAA_15	Background
ACGGAGACAAGAAGAG_19	Background
ACGGAGACACAGACAG_20	Background
ACGGAGACACTCTGTC_19	Background
ACGGAGACATTAACCG_20	Background
ACGGAGAGTTACGCGC_19	Background
ACGGAGAGTTTACTCT_19	Background
ACGGAGATCAACGGGA_19	Background
ACGGAGATCCGATATG_13	Background
ACGGAGATCCTTTACA_19	Background
ACGGCCAAGTGAAGAG_18	Background
ACGGCCAAGTTAGCGG_19	Background
ACGGCCAAGTTTAGGA_20	Background
ACGGCCACAAGCGAGT_13	Background
ACGGCCACAAGCGAGT_14	Background
ACGGCCACAAGCTGTT_15	Background
ACGGCCACATGCCTTC_15	Background
ACGGCCACATTCGACA_19	Background
ACGGCCAGTTCCCGAG_14	High-Risk
ACGGCCATCTCGATGA_18	Background
ACGGCCATCTGGTATG_19	Background
ACGGGCTAGCTGTTCA_20	Background
ACGGGCTAGTGGCACA_20	Background
ACGGGCTAGTGGGATC_14	Background
ACGGGCTAGTGTCCCG_18	Background
ACGGGCTCAATGGAGC_15	Background
ACGGGCTGTAGCGCTC_20	Background
ACGGGCTGTAGCTTGT_20	Background
ACGGGCTTCAAACCAC_18	Background
ACGGGCTTCACGACTA_19	Background
ACGGGCTTCGTAGATC_13	Background
ACGGGCTTCTCTTGAT_20	Background
ACGGGTCAGTGCCATT_18	Background
ACGGGTCCATATGAGA_20	High-Risk
ACGGGTCGTTTCGCTC_20	Background
ACGGGTCTCAACACAC_19	Background
ACGTCAAAGAAGGTTT_20	Background
ACGTCAAAGATGTAAC_18	Background
ACGTCAAAGGTACTCT_19	Background
ACGTCAAAGGTTACCT_20	Background
ACGTCAAAGTTACCCA_13	High-Risk
ACGTCAAAGTTACCCA_14	High-Risk
ACGTCAAGTAAATGTG_15	Background
ACGTCAAGTATAGGGC_14	Background
ACGTCAAGTTCTCATT_19	High-Risk
ACGTCAATCAAGATCC_20	Background
ACTATCTAGATAGGAG_19	Background
ACTATCTAGGGAAACA_20	Background
ACTATCTAGGTAAACT_15	High-Risk
ACTATCTCACAGCCCA_20	Background
ACTATCTCACGTCAGC_19	High-Risk
ACTATCTCAGTCGATT_20	High-Risk
ACTATCTGTATGAATG_19	Background
ACTATCTGTCGCATCG_14	High-Risk
ACTATCTGTCGCTTCT_20	High-Risk
ACTGAACAGGTACTCT_14	Background
ACTGAACCAAGCGAGT_20	Background
ACTGAACCACCGAAAG_19	Background
ACTGAACCACGACGAA_15	Background
ACTGAACCAGCCTATA_20	Background
ACTGAACGTAAGGATT_15	Background
ACTGAACGTACCATCA_19	Background
ACTGAACGTCCAGTAT_20	Background
ACTGAACGTGAGGCTA_13	Background
ACTGAACTCCACTCCA_20	Background
ACTGAGTCACAAGACG_20	Background
ACTGAGTCACCGAATT_13	Background
ACTGAGTGTCATATGC_20	Background
ACTGAGTTCATGTAGC_20	Background
ACTGAGTTCTCCGGTT_15	Background
ACTGAGTTCTTTAGTC_19	Background
ACTGATGAGCAGGTCA_20	Background
ACTGATGAGTAGTGCG_14	Background
ACTGATGAGTTGCAGG_15	Background
ACTGATGCAACTGGCC_13	Background
ACTGATGCAAGCGTAG_20	Background
ACTGATGCAGTCAGCC_20	Background
ACTGATGCAGTTCCCT_20	Background
ACTGATGGTCACTGGC_19	Background
ACTGATGGTGATGATA_20	Background
ACTGATGGTTGATTGC_19	Background
ACTGCTCAGACTCGGA_20	Background
ACTGCTCAGAGGTTGC_19	Background
ACTGCTCAGGTTCCTA_13	Background
ACTGCTCCAGCCAGAA_15	Background
ACTGCTCCATTGGGCC_20	Background
ACTGCTCGTTTCGCTC_18	High-Risk
ACTGTCCAGACCTAGG_19	Background
ACTGTCCAGCACCGTC_20	Background
ACTGTCCGTTGCGCAC_19	Background
ACTGTCCTCAAACGGG_15	Background
ACTGTCCTCGCCAAAT_20	Background
ACTGTCCTCGCCTGTT_20	High-Risk
ACTTACTAGCAGATCG_15	Background
ACTTACTCACTAAGTC_13	Background
ACTTACTCATATACCG_20	Background
ACTTACTCATGCCCGA_20	Background
ACTTACTGTCGCATAT_20	Background
ACTTACTGTTGACGTT_20	Background
ACTTACTTCTGAGTGT_19	Background
ACTTGTTAGCCAGTAG_20	Background
ACTTGTTAGTCTTGCA_19	Background
ACTTGTTCACGGCCAT_19	Background
ACTTGTTCACGTAAGG_20	Background
ACTTGTTCACTAAGTC_14	Background
ACTTGTTGTCGTTGTA_14	Background
ACTTGTTGTTGTACAC_20	Background
ACTTGTTTCAAAGACA_19	Background
ACTTGTTTCAAGGTAA_20	Background
ACTTGTTTCCAAACAC_20	Background
ACTTGTTTCTTATCTG_20	Background
ACTTGTTTCTTGACGA_15	Background
ACTTTCACAAGCCATT_18	Background
ACTTTCACACCGATAT_20	High-Risk
ACTTTCAGTAGCTGCC_15	Background
AGAATAGAGTAGCCGA_15	Background
AGAATAGAGTGAAGTT_20	Background
AGAATAGCAACGATGG_16	Background
AGAATAGCAAGCCTAT_14	Background
AGAATAGGTCTAGTGT_19	Background
AGACGTTAGCCCTAAT_20	Background
AGACGTTAGCTGGAAC_20	Background
AGACGTTAGGTTACCT_20	Background
AGACGTTTCAGCCTAA_15	Background
AGAGCGAAGCGTTTAC_19	Background
AGAGCGAAGGTGGGTT_14	Background
AGAGCGAGTAAGAGGA_20	Background
AGAGCGAGTCTACCTC_20	Background
AGAGCGAGTTGGACCC_18	Background
AGAGCGAGTTGGGACA_20	Background
AGAGCGATCATTTGGG_19	Background
AGAGCGATCTCAACTT_20	Background
AGAGCTTAGATCTGCT_19	Background
AGAGCTTAGATGTTAG_14	Background
AGAGCTTAGTGCAAGC_20	Background
AGAGCTTAGTGGACGT_20	Background
AGAGCTTCAAGCCGTC_20	Background
AGAGCTTCACGAAGCA_18	Background
AGAGCTTGTGCGGTAA_20	Background
AGAGCTTGTGGGTCAA_19	Background
AGAGCTTTCATGCATG_15	Background
AGAGCTTTCCTTAATC_20	Background
AGAGTGGAGGTAAACT_20	Background
AGAGTGGAGTCGTTTG_19	High-Risk
AGAGTGGCAACGATCT_18	Background
AGAGTGGCACAAGCCC_20	Background
AGAGTGGCATACGCTA_15	High-Risk
AGAGTGGCATACGCTA_16	Background
AGAGTGGGTACGAAAT_18	High-Risk
AGAGTGGGTGTGTGCC_20	Background
AGAGTGGGTTCCATGA_18	Background
AGAGTGGGTTGACGTT_14	High-Risk
AGAGTGGTCAATAAGG_20	Background
AGAGTGGTCAGTGTTG_15	Background
AGAGTGGTCCAATGGT_19	Background
AGAGTGGTCTAACTCT_14	Background
AGATCTGAGACTAGAT_19	Background
AGATCTGAGATCTGAA_20	Background
AGATCTGCAAAGGCGT_20	Background
AGATCTGCAGGACGTA_15	High-Risk
AGATCTGCATGGTAGG_18	Background
AGATCTGGTCAGAAGC_18	Background
AGATCTGGTTGTACAC_20	High-Risk
AGATCTGTCAAAGACA_15	High-Risk
AGATCTGTCGCTTGTC_20	Background
AGATTGCAGGCAAAGA_20	Background
AGATTGCCAGACGCCT_15	High-Risk
AGATTGCCATGGTTGT_20	Background
AGATTGCGTACAAGTA_20	Background
AGATTGCGTCGCGTGT_13	Background
AGATTGCGTCGCGTGT_14	Background
AGCAGCCAGGCCATAG_19	High-Risk
AGCAGCCAGTTAGGTA_18	Background
AGCAGCCCAAGAAGAG_13	Background
AGCAGCCCAAGACACG_20	High-Risk
AGCAGCCCACTCTGTC_20	Background
AGCAGCCGTAGGAGTC_13	Background
AGCAGCCGTGAGTATA_20	Background
AGCAGCCTCAGCATGT_18	Background
AGCATACAGTCGATAA_13	Background
AGCATACCAATCCAAC_15	Background
AGCATACCACGTGAGA_14	Background
AGCATACCATTCTCAT_19	Background
AGCATACGTGCAGGTA_19	Background
AGCATACTCGTCGTTC_15	Background
AGCATACTCTCAAGTG_20	Background
AGCATACTCTCCCTGA_16	Background
AGCCTAAAGACCTTTG_15	Background
AGCCTAAAGCCTTGAT_20	Background
AGCCTAACAATCGAAA_15	Background
AGCCTAACACAAGCCC_15	Background
AGCCTAACACAGGCCT_19	Background
AGCCTAACACGCCAGT_18	Background
AGCCTAACATGACATC_20	Background
AGCCTAACATTACGAC_19	Background
AGCCTAAGTATCACCA_15	High-Risk
AGCCTAAGTTACGCGC_20	Background
AGCGGTCAGACCACGA_19	Background
AGCGGTCAGATGAGAG_20	Background
AGCGGTCAGCATCATC_15	Background
AGCGGTCCAATAAGCA_13	High-Risk
AGCGGTCCAATAAGCA_14	Background
AGCGGTCCACCAGTTA_15	High-Risk
AGCGGTCCACCCATTC_20	Background
AGCGGTCCAGCCTGTG_18	High-Risk
AGCGGTCTCAGCTGGC_19	Background
AGCGGTCTCCAGATCA_15	Background
AGCGGTCTCGACGGAA_13	High-Risk
AGCGGTCTCGTGGTCG_19	Background
AGCGGTCTCTTCGGTC_19	Background
AGCGGTCTCTTGAGAC_19	Background
AGCGGTCTCTTGGGTA_20	Background
AGCGTATAGCCCAGCT_15	Background
AGCGTATCAGGATCGA_19	Background
AGCGTATGTTATTCTC_18	Background
AGCGTATTCAACACTG_15	Background
AGCGTATTCCCTGACT_13	Background
AGCGTATTCGAGAACG_13	Background
AGCGTCGAGACCACGA_19	Background
AGCGTCGAGATGGCGT_14	Background
AGCGTCGCACAAGCCC_19	Background
AGCGTCGCACAAGTAA_14	Background
AGCGTCGCACAGAGGT_13	Background
AGCGTCGCACGCTTTC_14	Background
AGCGTCGCAGTAAGCG_13	Background
AGCGTCGTCAACGAAA_16	Background
AGCGTCGTCGGCCGAT_20	Background
AGCTCCTAGACAGACC_13	Background
AGCTCCTAGACAGACC_14	Background
AGCTCCTAGACTAAGT_20	Background
AGCTCCTGTAAGAGGA_13	Background
AGCTCCTGTAAGAGGA_14	Background
AGCTCCTGTAGCGTAG_20	Background
AGCTCCTTCCACTGGG_20	Background
AGCTCCTTCTGTCTAT_13	High-Risk
AGCTCTCAGCGATAGC_18	High-Risk
AGCTCTCAGGGTTTCT_20	High-Risk
AGCTCTCAGGTCATCT_20	Background
AGCTCTCAGGTGATTA_15	Background
AGCTCTCAGTCGATAA_15	High-Risk
AGCTCTCCAGATGAGC_20	Background
AGCTCTCGTAGGAGTC_13	Background
AGCTCTCTCCGTTGTC_20	Background
AGCTCTCTCGCATGGC_18	Background
AGCTCTCTCGCGATCG_14	Background
AGCTCTCTCGGAGGTA_20	Background
AGCTTGAAGACAGGCT_20	Background
AGCTTGAAGATCTGAA_18	Background
AGCTTGAAGGACAGCT_13	Background
AGCTTGAAGGACAGCT_14	Background
AGCTTGAAGGATCGCA_19	Background
AGCTTGAAGTAGTGCG_19	Background
AGCTTGACAAACCTAC_20	Background
AGCTTGACACAGACTT_15	Background
AGCTTGACACCATCCT_13	Background
AGCTTGACAGATTGCT_20	High-Risk
AGCTTGACATAGAAAC_18	Background
AGCTTGAGTAAGGATT_19	High-Risk
AGCTTGATCATTCACT_14	High-Risk
AGCTTGATCATTCACT_15	High-Risk
AGGCCACAGCTAACTC_20	Background
AGGCCACAGTCCATAC_15	Background
AGGCCACAGTGGTCCC_16	Background
AGGCCACCACGGTAAG_20	Background
AGGCCACGTAAACACA_13	Background
AGGCCACGTACGCACC_20	High-Risk
AGGCCACGTGACGCCT_14	Background
AGGCCACGTGCGCTTG_19	Background
AGGCCACGTTCAGTAC_13	Background
AGGCCACTCACATAGC_13	Background
AGGCCACTCACCAGGC_13	Background
AGGCCACTCCAGTAGT_18	High-Risk
AGGCCGTAGCGATGAC_13	High-Risk
AGGCCGTAGCGATGAC_14	High-Risk
AGGCCGTAGCTTATCG_19	Background
AGGCCGTAGTGCGTGA_15	High-Risk
AGGCCGTAGTGGAGAA_20	Background
AGGCCGTCACGGATAG_19	Background
AGGCCGTCAGTGAGTG_19	High-Risk
AGGCCGTTCAGCGACC_15	Background
AGGCCGTTCTGTTTGT_14	Background
AGGGAGTAGTGCCAGA_13	Background
AGGGAGTAGTGCCAGA_14	High-Risk
AGGGAGTCAGCGTCCA_15	Background
AGGGAGTCAGTTAACC_16	Background
AGGGAGTTCTAACTGG_20	Background
AGGGATGAGAACAATC_18	Background
AGGGATGAGCGTTTAC_18	Background
AGGGATGCAGTAACGG_13	Background
AGGGATGCAGTCGTGC_15	High-Risk
AGGGATGGTCACACGC_20	Background
AGGGATGGTCACTTCC_15	High-Risk
AGGGATGGTTCGGCAC_13	Background
AGGGATGGTTTGCATG_14	High-Risk
AGGGATGTCAGCTTAG_14	Background
AGGGATGTCTCTGAGA_20	Background
AGGGATGTCTGCTGTC_19	Background
AGGGTGACAATAGCAA_14	Background
AGGGTGATCTACCTGC_19	High-Risk
AGGGTGATCTGCGACG_20	Background
AGGTCATAGACACGAC_15	Background
AGGTCATAGCTCCCAG_19	Background
AGGTCATCAGGTTTCA_19	Background
AGGTCATGTCCTCCAT_20	High-Risk
AGGTCATGTGAAAGAG_15	Background
AGGTCATGTGAGTGAC_19	High-Risk
AGGTCATGTGTTAAGA_16	High-Risk
AGGTCATTCAGGTAAA_15	High-Risk
AGGTCATTCCATGAAC_19	Background
AGGTCATTCGAATGGG_20	Background
AGGTCATTCTAACTCT_14	High-Risk
AGGTCATTCTTGCCGT_19	Background
AGGTCCGCAAACAACA_19	Background
AGGTCCGGTAAGAGGA_20	Background
AGGTCCGGTAATAGCA_18	Background
AGGTCCGGTAGGGACT_20	Background
AGGTCCGGTATGGTTC_20	Background
AGGTCCGGTGATAAGT_13	Background
AGGTCCGGTGCGAAAC_19	Background
AGGTCCGGTTTGACAC_13	Background
AGGTCCGTCAAGGCTT_19	Background
AGGTCCGTCTCTAGGA_20	Background
AGGTCCGTCTGCAAGT_20	High-Risk
AGTAGTCAGAGCTGCA_20	Background
AGTAGTCAGCAGGTCA_20	Background
AGTAGTCCAGTATGCT_19	Background
AGTAGTCTCGCATGAT_14	Background
AGTCTTTAGAATTCCC_20	Background
AGTCTTTCACCGAATT_14	Background
AGTCTTTGTAGGCATG_20	Background
AGTCTTTGTCATGCCG_18	Background
AGTCTTTGTGTGACCC_20	Background
AGTCTTTGTTGCCTCT_19	Background
AGTCTTTGTTGCGTTA_14	Background
AGTCTTTTCAAGGTAA_20	Background
AGTCTTTTCACCAGGC_20	High-Risk
AGTCTTTTCTCGATGA_19	Background
AGTGAGGAGCGTAGTG_20	Background
AGTGAGGAGCTTCGCG_19	High-Risk
AGTGAGGAGGACCACA_19	Background
AGTGAGGAGTTAGGTA_20	Background
AGTGAGGCATGTTCCC_20	Background
AGTGAGGGTCTAGGTT_20	Background
AGTGAGGGTTGTACAC_20	Background
AGTGGGAAGAGTACAT_18	Background
AGTGGGAAGCTGCCCA_18	Background
AGTGGGAAGTACATGA_20	Background
AGTGGGAAGTAGGTGC_19	Background
AGTGGGAAGTCACGCC_20	Background
AGTGGGAAGTGTTGAA_19	Background
AGTGGGACAGGCGATA_19	Background
AGTGGGAGTATTACCG_20	Background
AGTGGGAGTCGCTTCT_14	High-Risk
AGTGGGATCGGATGGA_19	High-Risk
AGTGGGATCTGTTTGT_13	Background
AGTGTCAAGCGTAATA_20	High-Risk
AGTGTCAAGTAGCGGT_19	Background
AGTGTCAAGTTTCCTT_19	Background
AGTGTCACAATTCCTT_19	Background
AGTGTCACAGGTGCCT_20	Background
AGTGTCACAGTTTACG_14	Background
AGTGTCAGTACATGTC_19	Background
AGTGTCAGTGATGCCC_19	Background
AGTGTCAGTTCGCGAC_15	Background
AGTGTCAGTTCTGGTA_20	Background
AGTGTCATCATCTGCC_19	High-Risk
AGTTGGTAGCAGACTG_13	Background
AGTTGGTAGCAGACTG_14	Background
AGTTGGTCAAACGTGG_13	Background
AGTTGGTCACAAGACG_18	High-Risk
AGTTGGTCACCTATCC_13	Background
AGTTGGTGTAGATTAG_18	Background
AGTTGGTGTATAGGTA_19	Background
AGTTGGTGTCCGCTGA_14	Background
AGTTGGTGTTTCGCTC_18	Background
AGTTGGTTCAGCGACC_20	Background
AGTTGGTTCATGCAAC_20	High-Risk
AGTTGGTTCTTAGAGC_20	Background
AGTTGGTTCTTGAGAC_20	Background
ATAACGCAGCCAACAG_15	High-Risk
ATAACGCAGCTCAACT_18	Background
ATAACGCAGTCTCGGC_19	Background
ATAACGCCAGTTAACC_20	High-Risk
ATAACGCGTCTCTCTG_20	Background
ATAACGCGTGCAACGA_16	Background
ATAACGCGTTTGTGTG_14	High-Risk
ATAAGAGAGAGTCTGG_20	High-Risk
ATAAGAGCAGGGTTAG_20	Background
ATAAGAGGTAAACGCG_20	Background
ATAAGAGGTAGAAAGG_19	Background
ATAAGAGGTTACTGAC_20	Background
ATAAGAGGTTCACCTC_19	Background
ATAAGAGTCAGTCCCT_15	High-Risk
ATAAGAGTCGTCACGG_14	High-Risk
ATAGACCAGGGAACGG_20	Background
ATAGACCCATGTCCTC_20	Background
ATAGACCGTATATGAG_19	Background
ATAGACCGTGTTGGGA_15	Background
ATAGACCGTTAAGTAG_17	Background
ATAGACCGTTGGTGGA_15	High-Risk
ATAGACCTCCCTTGTG_13	Background
ATCACGAAGACCTTTG_16	Background
ATCACGAAGTCCGTAT_15	Background
ATCACGACACACGCTG_15	Background
ATCACGACACGTCTCT_14	Background
ATCACGACACTGTGTA_18	Background
ATCACGACAGCCACCA_14	High-Risk
ATCACGAGTAAGTAGT_20	Background
ATCACGAGTAGCAAAT_19	Background
ATCACGAGTGTGACGA_20	Background
ATCACGATCACTTACT_19	Background
ATCACGATCCCGGATG_15	Background
ATCACGATCTTATCTG_20	Background
ATCATCTAGAACAACT_20	Background
ATCATCTAGAGAGCTC_16	Background
ATCATCTAGCGCCTTG_19	Background
ATCATCTAGTACACCT_19	Background
ATCATCTCACGGTAAG_15	High-Risk
ATCATCTCAGCATACT_15	High-Risk
ATCATCTCAGCCTTTC_19	Background
ATCATCTGTAAACGCG_19	Background
ATCATCTGTCATTAGC_14	High-Risk
ATCATCTGTCTACCTC_19	Background
ATCATCTTCCTTTCGG_19	Background
ATCATCTTCTCAACTT_19	Background
ATCATGGAGATAGCAT_19	High-Risk
ATCATGGAGTGAACAT_20	High-Risk
ATCATGGAGTGCTGCC_19	Background
ATCATGGCACTTGGAT_20	Background
ATCCACCAGCGTTTAC_13	High-Risk
ATCCACCAGCTAACTC_13	High-Risk
ATCCACCAGTTGAGTA_19	Background
ATCCACCCAGAAGCAC_13	Background
ATCCACCCAGAAGCAC_14	Background
ATCCACCCATACTCTT_20	Background
ATCCACCGTCCATCCT_15	High-Risk
ATCCACCGTCTTGCGG_18	Background
ATCCACCTCGGCATCG_20	Background
ATCCACCTCGGCGGTT_14	High-Risk
ATCCACCTCTCTAAGG_19	Background
ATCCGAAAGGGATGGG_15	Background
ATCCGAACACGCGAAA_18	Background
ATCCGAACACGTCAGC_20	High-Risk
ATCCGAACACTGAAGG_15	High-Risk
ATCCGAACAGATGAGC_20	High-Risk
ATCCGAAGTCCTAGCG_14	High-Risk
ATCCGAAGTCTAGGTT_20	High-Risk
ATCGAGTAGCCAGGAT_18	Background
ATCGAGTAGCCGATTT_20	Background
ATCGAGTAGCTAAACA_15	High-Risk
ATCGAGTAGGCAAAGA_14	High-Risk
ATCGAGTAGGCGACAT_19	Background
ATCGAGTAGTGATCGG_15	Background
ATCGAGTCACTGTTAG_14	Background
ATCGAGTTCTTTACAC_20	Background
ATCTACTAGTCTCGGC_18	Background
ATCTACTAGTGTTTGC_14	Background
ATCTACTCAATACGCT_20	Background
ATCTACTGTATTCTCT_19	Background
ATCTACTGTCACAAGG_20	High-Risk
ATCTACTGTCTTCAAG_20	Background
ATCTACTTCATCATTC_16	Background
ATCTACTTCGCCGTGA_20	Background
ATCTGCCAGAGCCTAG_14	Background
ATCTGCCAGAGCTGGT_20	Background
ATCTGCCAGAGTAAGG_19	Background
ATCTGCCAGATATGCA_19	Background
ATCTGCCCAAGCGATG_18	Background
ATCTGCCCACCTCGTT_20	Background
ATCTGCCCACTTAACG_14	High-Risk
ATCTGCCGTCAGAATA_18	Background
ATCTGCCTCAACCATG_19	Background
ATCTGCCTCCTCTAGC_15	High-Risk
ATGAGGGAGAATGTGT_19	Background
ATGAGGGAGCTGCCCA_18	Background
ATGAGGGAGTGAATTG_20	High-Risk
ATGAGGGGTTCAACCA_20	Background
ATGAGGGGTTGCGTTA_18	Background
ATGAGGGTCGCTAGCG_20	Background
ATGCGATAGACTTGAA_20	Background
ATGCGATAGATGAGAG_20	Background
ATGCGATAGTGTACGG_20	Background
ATGCGATCAAGTTAAG_19	Background
ATGCGATCACGCATCG_19	Background
ATGCGATCAGTCAGAG_13	Background
ATGCGATCAGTCAGAG_14	Background
ATGCGATTCGCCGTGA_20	Background
ATGCGATTCTATGTGG_19	Background
ATGGGAGAGACTAGGC_20	Background
ATGGGAGAGATGTCGG_20	Background
ATGGGAGAGCGAAGGG_20	Background
ATGGGAGAGGAGTAGA_20	Background
ATGGGAGCATACCATG_14	Background
ATGGGAGGTACTCAAC_13	Background
ATGGGAGGTACTCAAC_14	Background
ATGGGAGGTCGAGATG_18	Background
ATGGGAGGTGGCGAAT_14	High-Risk
ATGGGAGGTGGCGAAT_15	Background
ATGGGAGGTTCCATGA_20	Background
ATGGGAGTCCAAACAC_14	Background
ATGTGTGAGTGGTCCC_19	Background
ATGTGTGGTGACCAAG_20	Background
ATGTGTGGTTAGTGGG_20	High-Risk
ATGTGTGTCTTTACGT_14	Background
ATTACTCAGAGACGAA_13	Background
ATTACTCAGAGACGAA_14	Background
ATTACTCAGCAGGCTA_15	Background
ATTACTCAGGCATGTG_13	Background
ATTACTCCAATGCCAT_13	Background
ATTACTCCACAGGCCT_13	Background
ATTACTCCACATAACC_20	Background
ATTACTCCACTGAAGG_20	High-Risk
ATTACTCGTGTGGTTT_20	Background
ATTACTCGTTATCGGT_19	High-Risk
ATTATCCAGGCAAAGA_14	High-Risk
ATTATCCAGGCAAAGA_15	High-Risk
ATTATCCAGGCCCTTG_20	Background
ATTATCCCAAGTCTGT_20	High-Risk
ATTATCCCAATCTACG_15	Background
ATTATCCCACACCGCA_20	Background
ATTATCCCAGATTGCT_15	High-Risk
ATTATCCCATTGGTAC_15	Background
ATTATCCGTAAGGATT_14	Background
ATTATCCGTAGCCTCG_19	Background
ATTATCCGTCAGCTAT_19	Background
ATTATCCGTTCAGCGC_15	High-Risk
ATTATCCGTTCAGTAC_20	Background
ATTCTACAGCTTATCG_13	Background
ATTCTACAGCTTATCG_14	Background
ATTCTACAGTCAAGCG_19	High-Risk
ATTCTACAGTCGAGTG_13	Background
ATTCTACAGTCGAGTG_14	Background
ATTCTACAGTTGTAGA_13	High-Risk
ATTCTACCAATGTTGC_14	High-Risk
ATTCTACCACAGGAGT_13	Background
ATTCTACCATCCCATC_13	High-Risk
ATTCTACGTCAGAGGT_19	High-Risk
ATTCTACGTCGCATAT_19	Background
ATTCTACGTTATTCTC_19	Background
ATTCTACTCAGAGCTT_20	Background
ATTCTACTCCCTCAGT_15	Background
ATTCTACTCGATAGAA_20	Background
ATTCTACTCTACTTAC_20	Background
ATTCTACTCTCGAGTA_20	Background
ATTGGACAGTACATGA_19	Background
ATTGGACAGTACGTAA_20	Background
ATTGGACAGTTTCCTT_20	Background
ATTGGACCAAACCCAT_20	Background
ATTGGACGTGCGATAG_20	Background
ATTGGACGTGGGTCAA_15	Background
ATTGGACGTGGTGTAG_20	Background
ATTGGACTCGTCCAGG_19	High-Risk
ATTGGTGCAATAGCAA_19	Background
ATTGGTGCACACTGCG_19	Background
ATTGGTGCAGCCAATT_13	Background
ATTTCTGAGACACTAA_20	Background
ATTTCTGAGTTCGCAT_20	Background
ATTTCTGCAATGTTGC_15	High-Risk
ATTTCTGCACTAAGTC_15	Background
ATTTCTGCAGCCTGTG_13	Background
ATTTCTGCAGCCTGTG_14	Background
ATTTCTGCATCAGTCA_19	Background
ATTTCTGCATGCATGT_20	Background
ATTTCTGGTAAATACG_20	Background
ATTTCTGGTAAGCACG_20	Background
ATTTCTGGTATCACCA_19	Background
ATTTCTGGTATCTGCA_20	Background
ATTTCTGTCAGTTCGA_19	Background
CAACCAAAGAAACCGC_20	Background
CAACCAAAGAGGTACC_14	Background
CAACCAAAGATGTGTA_19	Background
CAACCAAAGCACGCCT_20	Background
CAACCAAAGCCACGCT_19	High-Risk
CAACCAAAGGCGCTCT_19	Background
CAACCAAAGTTTCCTT_13	Background
CAACCAACAAACAACA_19	Background
CAACCAACATGATCCA_19	Background
CAACCAAGTAAGTGTA_19	Background
CAACCAAGTACCGTAT_14	High-Risk
CAACCAAGTGCCTTGG_14	Background
CAACCAAGTGCCTTGG_20	Background
CAACCAAGTTGCCTCT_18	Background
CAACCTCAGAAGGACA_15	High-Risk
CAACCTCAGATGAGAG_20	Background
CAACCTCCAAGCGATG_20	High-Risk
CAACCTCCAATGAAAC_20	Background
CAACCTCCAGATAATG_14	Background
CAACCTCGTTCAGCGC_13	High-Risk
CAACCTCTCAGCTGGC_20	Background
CAACCTCTCGTGGTCG_20	Background
CAACTAGAGCGCTCCA_18	Background
CAACTAGAGGAATCGC_19	High-Risk
CAACTAGAGGCAGGTT_19	High-Risk
CAACTAGAGTGAACAT_19	Background
CAACTAGCAAGGTTCT_15	Background
CAACTAGCAAGGTTCT_16	Background
CAACTAGCACTTGGAT_19	High-Risk
CAACTAGCATACTCTT_15	Background
CAACTAGGTCAGCTAT_16	Background
CAACTAGGTTTGGGCC_20	Background
CAACTAGTCAAAGTAG_18	Background
CAACTAGTCGCTGATA_20	Background
CAAGAAAAGCATGGCA_14	High-Risk
CAAGAAAAGCATGGCA_15	Background
CAAGAAAAGCATGGCA_16	High-Risk
CAAGAAAAGGCAATTA_14	Background
CAAGAAAAGTTGAGAT_13	High-Risk
CAAGAAACACTGAAGG_19	Background
CAAGAAACAGGGTACA_13	Background
CAAGAAAGTGAGGCTA_15	Background
CAAGAAATCAGTTGAC_19	Background
CAAGAAATCCTAGAAC_13	Background
CAAGAAATCCTAGAAC_16	Background
CAAGATCAGGTGATTA_19	Background
CAAGATCCACATGGGA_15	Background
CAAGATCCAGTCCTTC_13	Background
CAAGATCCAGTCCTTC_14	Background
CAAGATCGTTATTCTC_13	Background
CAAGATCTCTTATCTG_15	Background
CAAGGCCAGTCCAGGA_19	High-Risk
CAAGGCCCAAGTCTAC_19	Background
CAAGGCCCATTCTTAC_19	Background
CAAGGCCGTCCCTACT_15	Background
CAAGGCCGTCCCTACT_20	Background
CAAGGCCTCAATACCG_18	Background
CAAGGCCTCACGCGGT_15	Background
CAAGTTGCAATACGCT_19	Background
CAAGTTGCACATGTGT_20	Background
CAAGTTGCATCGATTG_14	Background
CAAGTTGGTCTTGATG_20	High-Risk
CAAGTTGGTTCCAACA_15	Background
CAAGTTGGTTTAGCTG_20	Background
CAAGTTGTCACTATTC_20	Background
CAAGTTGTCCCTAATT_19	Background
CAAGTTGTCGGCATCG_15	High-Risk
CACAAACAGAGCTGGT_14	Background
CACAAACCAGGTGGAT_20	Background
CACAAACGTATTCTCT_20	Background
CACAAACGTCTAACGT_13	Background
CACAAACGTGGTGTAG_19	Background
CACAAACGTGTGAATA_15	Background
CACAAACTCAGGCGAA_20	Background
CACAAACTCTGTACGA_20	High-Risk
CACAAACTCTGTTGAG_20	Background
CACACAAAGCCTATGT_19	Background
CACACAACACGAGAGT_13	Background
CACACAATCCAAACTG_20	Background
CACACAATCCACTGGG_15	Background
CACACAATCCGGCACA_19	Background
CACACAATCGTGGACC_15	High-Risk
CACACAATCTCAAGTG_18	Background
CACACCTAGGCCCTTG_14	Background
CACACCTAGTCTCGGC_20	Background
CACACCTAGTGTACGG_14	Background
CACACCTCACGAAGCA_14	Background
CACACCTCAGCCTGTG_19	High-Risk
CACACCTCAGCTGTTA_20	Background
CACACCTGTGGGTCAA_20	High-Risk
CACACCTTCACAACGT_19	Background
CACACCTTCACCCTCA_20	Background
CACACCTTCATAGCAC_20	Background
CACACCTTCCGAGCCA_14	Background
CACACCTTCTCACATT_15	High-Risk
CACACTCAGGTTCCTA_20	Background
CACACTCAGTAGGTGC_20	Background
CACACTCCATCGGACC_20	Background
CACACTCGTAAGCACG_14	High-Risk
CACACTCGTAAGCACG_15	Background
CACACTCGTCGAACAG_18	Background
CACACTCTCCAAAGTC_13	Background
CACACTCTCCAAAGTC_14	Background
CACACTCTCCAAGTAC_19	Background
CACAGGCAGAAGGCCT_20	Background
CACAGGCAGACATAAC_19	High-Risk
CACAGGCAGGTGCAAC_15	Background
CACAGGCAGTTTAGGA_20	Background
CACAGGCCAACGATGG_20	Background
CACAGGCCAATTCCTT_20	Background
CACAGGCCACGCGAAA_20	Background
CACAGGCCACGGCTAC_19	Background
CACAGGCGTCTGCAAT_19	Background
CACAGGCGTTCAGGCC_18	Background
CACAGGCTCATTCACT_20	Background
CACAGGCTCCATTCTA_15	Background
CACAGTAAGTACGCCC_13	High-Risk
CACAGTACAATGGACG_20	Background
CACAGTACAGTCGTGC_14	High-Risk
CACAGTACATAACCTG_19	High-Risk
CACAGTAGTAAATACG_19	High-Risk
CACAGTATCGGAAATA_20	Background
CACATAGGTACCGTAT_15	Background
CACATAGGTGCAACTT_19	Background
CACATAGGTTTCCACC_20	Background
CACATAGTCAGAAATG_15	Background
CACATAGTCCTTTCTC_20	High-Risk
CACATAGTCGGTGTTA_20	Background
CACATAGTCTGCGACG_20	Background
CACATTTAGACTCGGA_18	Background
CACATTTAGCCAACAG_20	High-Risk
CACATTTAGTGGTAGC_15	High-Risk
CACATTTCAGATTGCT_18	High-Risk
CACATTTGTACGAAAT_19	Background
CACATTTGTAGCACGA_15	Background
CACATTTGTCATATGC_20	High-Risk
CACATTTTCAAGAAGT_13	Background
CACATTTTCAAGAAGT_14	Background
CACATTTTCAGTTTGG_19	Background
CACATTTTCCGTACAA_14	Background
CACATTTTCCTTGCCA_14	High-Risk
CACATTTTCCTTGCCA_15	High-Risk
CACCACTAGTCCAGGA_20	Background
CACCACTCATCGGAAG_15	Background
CACCACTCATGAGCGA_19	Background
CACCACTGTCCGAAGA_15	Background
CACCACTGTCCGACGT_16	Background
CACCACTGTCGCCATG_19	Background
CACCACTGTCTGCGGT_20	Background
CACCACTTCCTGTACC_20	Background
CACCAGGAGACAAGCC_18	Background
CACCAGGAGATATGGT_20	Background
CACCAGGAGCTCCCAG_20	Background
CACCAGGAGGAATGGA_19	Background
CACCAGGCAGTCTTCC_20	Background
CACCAGGCATTCCTCG_19	Background
CACCAGGGTACGCACC_20	Background
CACCAGGGTCGACTGC_19	Background
CACCAGGGTTACTGAC_20	Background
CACCAGGGTTCTGGTA_19	High-Risk
CACCAGGGTTTCCACC_15	Background
CACCAGGTCATTGCCC_14	Background
CACCAGGTCCCATTTA_15	Background
CACCAGGTCCTGCCAT_15	Background
CACCAGGTCGCCTGTT_19	Background
CACCTTGAGGCGTACA_19	High-Risk
CACCTTGTCCGCATCT_19	Background
CACCTTGTCCTGCTTG_20	Background
CACCTTGTCGTCGTTC_20	Background
CACTCCACAGGGATTG_20	Background
CACTCCAGTGTGCCTG_14	Background
CACTCCATCTGGCGAC_20	Background
CAGAATCCAGGTCGTC_14	High-Risk
CAGAATCGTAAGAGAG_19	Background
CAGAATCGTTTGCATG_20	Background
CAGAATCGTTTGTGTG_20	Background
CAGAATCTCGATCCCT_18	Background
CAGAGAGAGCCACTAT_18	Background
CAGAGAGAGTGAATTG_16	Background
CAGAGAGCAGAAGCAC_19	Background
CAGAGAGCAGCGTTCG_20	Background
CAGAGAGCAGTCTTCC_13	Background
CAGAGAGCATCACGTA_13	Background
CAGAGAGGTCCATGAT_20	High-Risk
CAGAGAGGTCGCCATG_19	Background
CAGAGAGTCCACGTGG_18	Background
CAGATCAAGAGTCGGT_13	High-Risk
CAGATCAAGAGTCGGT_14	Background
CAGATCAAGATCTGCT_14	High-Risk
CAGATCAAGATGGGTC_14	High-Risk
CAGATCACAAACTGTC_20	High-Risk
CAGATCACAGAGTGTG_19	Background
CAGATCACATGCATGT_16	Background
CAGATCAGTCGGCACT_19	Background
CAGATCAGTTCACGGC_20	Background
CAGATCAGTTTACTCT_20	Background
CAGATCATCAGGCAAG_15	Background
CAGATCATCATAGCAC_19	Background
CAGATCATCGGCATCG_13	Background
CAGATCATCTGTACGA_19	Background
CAGCAGCAGAGCCCAA_19	Background
CAGCAGCAGAGTACCG_14	High-Risk
CAGCAGCAGCTGCGAA_19	Background
CAGCAGCCACAGAGGT_13	Background
CAGCAGCCATGCCCGA_20	Background
CAGCAGCGTACTCTCC_20	Background
CAGCAGCTCAACACTG_20	Background
CAGCATAGTGAGGGAG_18	Background
CAGCCGAAGTACGTTC_15	Background
CAGCCGAAGTTTAGGA_20	Background
CAGCCGACAGACTCGC_20	Background
CAGCCGACATGTTGAC_15	Background
CAGCCGAGTCCAGTGC_19	Background
CAGCCGATCCCATTTA_19	Background
CAGCCGATCGTAGGAG_18	Background
CAGCGACCACCAGATT_20	High-Risk
CAGCGACCAGTGGGAT_20	High-Risk
CAGCGACCATAAAGGT_20	Background
CAGCGACGTAAGGATT_14	Background
CAGCGACTCCACGTTC_20	Background
CAGCGACTCCAGAGGA_15	Background
CAGCGACTCCCATTAT_19	High-Risk
CAGCGACTCCGTCATC_19	Background
CAGCGACTCGCCCTTA_19	Background
CAGCGACTCGGTGTCG_13	Background
CAGCGACTCTCGCATC_20	High-Risk
CAGCTAAAGCGTGAAC_19	Background
CAGCTAAAGCTAGTGG_15	Background
CAGCTAAAGGGATGGG_19	Background
CAGCTAAAGTTCGATC_13	Background
CAGCTAACAGGTCCAC_19	High-Risk
CAGCTAACATCCGTGG_19	Background
CAGCTAACATCCTTGC_20	Background
CAGCTAAGTCGGATCC_19	Background
CAGCTGGAGATCTGCT_13	Background
CAGCTGGAGATCTGCT_14	Background
CAGCTGGAGATGTAAC_19	Background
CAGCTGGAGTAGCCGA_20	Background
CAGCTGGCAGTAGAGC_19	Background
CAGCTGGGTCGGGTCT_15	High-Risk
CAGCTGGGTGCGGTAA_19	High-Risk
CAGCTGGTCAATCTCT_18	Background
CAGCTGGTCCGTTGTC_13	Background
CAGCTGGTCGCATGGC_19	Background
CAGCTGGTCGTCCAGG_20	High-Risk
CAGGTGCAGGACATTA_15	High-Risk
CAGGTGCAGTACGACG_18	Background
CAGGTGCCACAGATTC_19	Background
CAGGTGCGTAGGACAC_20	Background
CAGGTGCGTCAACATC_19	Background
CAGGTGCGTGCGATAG_20	Background
CAGTAACCAAGCGAGT_13	Background
CAGTAACCACAGGTTT_19	Background
CAGTAACCAGGGCATA_20	Background
CAGTAACGTAAGGGCT_20	Background
CAGTAACGTATAGTAG_20	Background
CAGTAACGTCAGTGGA_20	Background
CAGTAACGTCTAGGTT_19	High-Risk
CAGTAACTCGCCCTTA_14	High-Risk
CAGTCCTAGGCTACGA_20	Background
CAGTCCTAGGGTATCG_20	Background
CAGTCCTGTTCGGCAC_20	Background
CAGTCCTTCACGCATA_20	Background
CAGTCCTTCGTAGGAG_18	Background
CATATGGAGAAGCCCA_14	High-Risk
CATATGGAGAAGCCCA_15	High-Risk
CATATGGAGCTAGTGG_14	Background
CATATGGCAAGCCGCT_19	Background
CATATGGCAAGCGCTC_19	High-Risk
CATATGGCAAGCTGAG_20	Background
CATATGGCACTTCTGC_20	Background
CATATGGCATGCTGGC_19	High-Risk
CATATGGTCACATGCA_19	Background
CATATGGTCACCTTAT_20	Background
CATATTCAGCAGCCTC_20	Background
CATATTCAGTATGACA_15	High-Risk
CATATTCAGTATGACA_16	High-Risk
CATATTCGTAAACGCG_20	Background
CATATTCGTAGCTGCC_14	Background
CATATTCGTCTAGTGT_14	Background
CATATTCGTGCCTTGG_19	Background
CATCAAGCAGATCCAT_15	High-Risk
CATCAAGCATCGTCGG_19	Background
CATCAAGCATTGGGCC_19	Background
CATCAAGGTAGAAAGG_15	High-Risk
CATCAAGGTCGAATCT_19	High-Risk
CATCAAGGTCGAGATG_19	High-Risk
CATCAAGTCCGCATAA_20	Background
CATCAGAAGAACAATC_20	Background
CATCAGACACAGGAGT_18	Background
CATCAGACACCGCTAG_15	Background
CATCAGACATCGGGTC_18	Background
CATCAGATCCACGTGG_20	Background
CATCCACAGAAGGGTA_20	Background
CATCCACCAAACTGTC_18	Background
CATCCACCAAAGAATC_20	Background
CATCCACCAAGTAGTA_20	Background
CATCCACCACATCTTT_19	Background
CATCCACCACGCCAGT_19	Background
CATCCACCAGAGTGTG_15	High-Risk
CATCCACCATAAGACA_20	Background
CATCCACTCCTGCCAT_15	Background
CATCGAACAAGTCATC_16	Background
CATCGAACAGGTGCCT_15	Background
CATCGAAGTAAATACG_20	Background
CATCGAAGTAATAGCA_19	Background
CATCGAAGTCCGTTAA_19	Background
CATCGAAGTGCCTGCA_20	High-Risk
CATCGAATCAGTCAGT_19	Background
CATCGGGAGAGGGCTT_18	High-Risk
CATCGGGAGTGTACCT_19	Background
CATCGGGCAAGTCTGT_19	Background
CATCGGGCATATGAGA_20	Background
CATCGGGGTACTCTCC_20	Background
CATCGGGGTTTGACTG_15	Background
CATCGGGTCAACCATG_20	Background
CATCGGGTCCAGATCA_20	High-Risk
CATCGGGTCTGGGCCA_19	High-Risk
CATCGGGTCTTGGGTA_19	Background
CATGACAAGAGCTGCA_20	Background
CATGACACAAGGCTCC_19	Background
CATGACACACGCCAGT_20	Background
CATGACACATGCCTTC_20	Background
CATGACAGTAGAGCTG_19	Background
CATGACATCAACCAAC_14	Background
CATGACATCGCTGATA_20	Background
CATGACATCTTACCGC_16	Background
CATGCCTAGAGCTTCT_19	Background
CATGCCTCAAATACAG_19	Background
CATGCCTCACACATGT_20	Background
CATGCCTCACCCAGTG_14	Background
CATGCCTTCCGCGTTT_20	Background
CATGCCTTCGGCGCAT_16	Background
CATGCCTTCTACGAGT_20	Background
CATGGCGAGAGTGACC_13	Background
CATGGCGAGATACACA_13	Background
CATGGCGAGCTAACTC_15	Background
CATGGCGGTCTAAACC_20	Background
CATGGCGGTGTGGTTT_20	Background
CATGGCGTCGACGGAA_20	Background
CATTATCCACAGGTTT_19	Background
CATTATCGTATTCTCT_20	Background
CATTATCGTCTACCTC_13	Background
CATTATCGTTTGACTG_15	Background
CATTATCTCAATCTCT_20	Background
CATTATCTCCACGACG_18	High-Risk
CATTATCTCGCCTGTT_15	High-Risk
CATTCGCAGATATACG_18	Background
CATTCGCAGATCCTGT_16	Background
CATTCGCAGGCGCTCT_14	High-Risk
CATTCGCGTACGCTGC_20	High-Risk
CATTCGCGTATAGGGC_14	Background
CATTCGCGTCAGCTAT_13	Background
CATTCGCGTCCTCCAT_19	Background
CATTCGCTCACGATGT_20	Background
CATTCGCTCCTATTCA_18	Background
CATTCGCTCGTCGTTC_13	Background
CATTCGCTCTCACATT_19	Background
CCAATCCGTCTCATCC_19	Background
CCAATCCTCAGAGGTG_20	Background
CCAATCCTCATCGCTC_20	Background
CCAATCCTCTACCAGA_15	Background
CCACCTACATGATCCA_20	High-Risk
CCACCTAGTCCAGTAT_18	Background
CCACCTAGTCTGCGGT_19	Background
CCACCTATCCCTTGTG_15	Background
CCACCTATCGTATCAG_20	Background
CCACGGAAGACAGGCT_15	Background
CCACGGACACGCCAGT_14	High-Risk
CCACGGACACGCCAGT_15	High-Risk
CCACGGAGTCTCTTTA_19	Background
CCACGGAGTGAGGCTA_14	High-Risk
CCACGGAGTGTCCTCT_20	Background
CCACGGAGTTCTGTTT_20	High-Risk
CCACGGATCATCACCC_20	Background
CCACGGATCCATGCTC_15	Background
CCACGGATCCCTCTTT_20	Background
CCACGGATCGTATCAG_20	Background
CCACGGATCGTGTAGT_13	High-Risk
CCACTACAGACTTTCG_18	Background
CCACTACAGAGGTACC_19	Background
CCACTACAGTGACATA_14	Background
CCACTACCAACTGCGC_20	Background
CCACTACCAGCCACCA_19	Background
CCACTACCATTCTCAT_20	Background
CCACTACGTACCTACA_15	Background
CCACTACGTGAAGGCT_20	Background
CCACTACGTGTTCGAT_20	Background
CCACTACGTTCACCTC_20	Background
CCACTACTCCTGTAGA_18	Background
CCACTACTCGTTACAG_19	High-Risk
CCAGCGAAGCCATCGC_16	Background
CCAGCGAAGCGTTCCG_19	Background
CCAGCGAAGTATGACA_14	High-Risk
CCAGCGACAAATCCGT_20	Background
CCAGCGACACATGTGT_18	Background
CCAGCGAGTATAGTAG_19	High-Risk
CCAGCGAGTCGCTTCT_20	Background
CCAGCGAGTTATGTGC_20	Background
CCAGCGAGTTTGGGCC_20	Background
CCAGCGATCCAAAGTC_20	Background
CCATGTCAGAAACCGC_19	Background
CCATGTCAGGACACCA_20	Background
CCATGTCAGGTGACCA_20	Background
CCATGTCAGTCACGCC_20	Background
CCATGTCAGTCCTCCT_20	Background
CCATGTCAGTGTGAAT_19	High-Risk
CCATGTCCAATAGCAA_14	Background
CCATGTCGTCTCTCTG_15	High-Risk
CCATGTCGTGCTGTAT_15	High-Risk
CCATGTCGTTAGAACA_19	Background
CCATGTCTCACGCGGT_15	Background
CCATGTCTCCTCTAGC_19	Background
CCATTCGAGACACTAA_15	Background
CCATTCGAGCAGCGTA_13	Background
CCATTCGAGGGAACGG_14	Background
CCATTCGAGGTGACCA_13	Background
CCATTCGAGGTGACCA_14	Background
CCATTCGCAACTGCTA_15	Background
CCATTCGCAAGTAATG_20	Background
CCATTCGCACGGTGTC_15	Background
CCATTCGCAGGCTGAA_20	Background
CCATTCGTCTACTCAT_19	Background
CCATTCGTCTCCCTGA_19	Background
CCCAATCAGGTGATAT_20	Background
CCCAATCAGTGTTTGC_15	Background
CCCAATCCAGCATACT_19	Background
CCCAATCGTACTTAGC_15	High-Risk
CCCAATCGTCATCCCT_13	Background
CCCAATCGTCGGCACT_15	Background
CCCAATCTCTTTAGGG_19	High-Risk
CCCAGTTAGACTTGAA_14	High-Risk
CCCAGTTAGGTAAACT_19	High-Risk
CCCAGTTAGTACGCGA_15	High-Risk
CCCAGTTAGTGACTCT_20	Background
CCCAGTTCATCGGGTC_20	Background
CCCAGTTGTCCCTACT_14	Background
CCCAGTTGTTAAGAAC_19	Background
CCCAGTTTCCCTTGCA_15	Background
CCCATACAGTCCCACG_18	Background
CCCATACCAATCGGTT_19	Background
CCCATACCACGAAGCA_19	Background
CCCATACGTCTAAAGA_19	Background
CCCATACGTCTAACGT_14	Background
CCCATACGTCTCAACA_20	Background
CCCATACGTGGTCTCG_14	Background
CCCATACTCAGCTCGG_18	Background
CCCTCCTAGCTATGCT_19	Background
CCCTCCTCAAGCGCTC_19	Background
CCCTCCTGTCTGGTCG_15	Background
CCCTCCTTCAACGCTA_15	Background
CCCTCCTTCGGCTACG_13	Background
CCGGGATAGAGTAATC_19	Background
CCGGGATAGATATGCA_20	High-Risk
CCGGGATAGTCGAGTG_20	Background
CCGGGATCAACTGCTA_19	High-Risk
CCGGGATCAAGCCCAC_20	Background
CCGGGATCAGACGCCT_15	Background
CCGGGATCAGACGCTC_14	Background
CCGGGATGTACAAGTA_20	Background
CCGGGATGTCCAGTAT_18	Background
CCGGGATGTTACGACT_20	High-Risk
CCGGGATGTTTGCATG_20	Background
CCGGTAGAGAAACCTA_20	Background
CCGGTAGAGCACCGTC_19	Background
CCGGTAGCACCCATTC_19	Background
CCGGTAGGTACCCAAT_15	Background
CCGGTAGGTCATTAGC_20	High-Risk
CCGGTAGTCGGTCTAA_19	Background
CCGTACTAGAGTAAGG_19	Background
CCGTACTAGCACACAG_20	Background
CCGTACTCAATGGAGC_19	Background
CCGTACTCACAAGTAA_13	Background
CCGTACTCACAAGTAA_14	Background
CCGTACTCACCATGTA_20	Background
CCGTACTCAGTCGATT_14	Background
CCGTACTCATCATCCC_15	High-Risk
CCGTACTGTCGCCATG_20	Background
CCGTACTGTGATAAGT_20	Background
CCGTACTGTTTAGGAA_13	Background
CCGTGGAAGAAGATTC_20	Background
CCGTGGAAGCCACGTC_13	Background
CCGTGGACAATAAGCA_19	Background
CCGTGGACATAGGATA_18	Background
CCGTGGACATGCCCGA_19	Background
CCGTGGAGTACCCAAT_14	Background
CCGTGGAGTATATCCG_16	Background
CCGTGGAGTTAGGGTG_13	Background
CCGTGGAGTTAGGGTG_14	Background
CCGTGGAGTTCCACAA_19	Background
CCGTGGATCAAAGACA_15	Background
CCGTGGATCTGGCGTG_19	Background
CCGTTCAAGACAATAC_20	High-Risk
CCGTTCAAGAGCTGCA_20	Background
CCGTTCAAGGCAATTA_14	Background
CCGTTCAAGGCTACGA_19	Background
CCGTTCAAGTAGATGT_19	Background
CCGTTCAGTCACCTAA_20	Background
CCGTTCATCACATAGC_20	Background
CCGTTCATCCGCAGTG_20	Background
CCGTTCATCCTAGTGA_20	Background
CCGTTCATCGATCCCT_20	Background
CCGTTCATCGCCGTGA_13	Background
CCGTTCATCGCCGTGA_14	Background
CCTAAAGAGCAGGTCA_20	Background
CCTAAAGAGTAATCCC_20	High-Risk
CCTAAAGAGTGTGAAT_18	Background
CCTAAAGCACTTAAGC_14	Background
CCTAAAGGTAGAGCTG_19	Background
CCTAAAGGTTTCCACC_15	High-Risk
CCTAAAGTCCTTTCGG_13	Background
CCTAAAGTCCTTTCGG_14	Background
CCTAAAGTCTACTTAC_20	Background
CCTACACAGAACTCGG_15	Background
CCTACACAGACTAGGC_13	Background
CCTACACAGAGCCTAG_19	Background
CCTACACAGAGGTTAT_20	Background
CCTACACAGCCGCCTA_15	High-Risk
CCTACACAGGAGCGTT_15	High-Risk
CCTACACAGTGACATA_19	Background
CCTACACCACCATGTA_20	High-Risk
CCTACACCACCCATGG_15	High-Risk
CCTACACCACCCATGG_16	Background
CCTACACGTGTCGCTG_20	High-Risk
CCTACACGTTGACGTT_14	High-Risk
CCTACACGTTGACGTT_15	High-Risk
CCTACACTCCGTTGTC_15	Background
CCTACCAAGCCAGAAC_19	Background
CCTACCAAGGAGCGAG_15	Background
CCTACCAAGTAGCGGT_20	Background
CCTACCACAAACTGCT_20	Background
CCTACCACAGCTTAAC_20	Background
CCTACCACATGCTGGC_20	Background
CCTACCAGTCCAGTAT_20	Background
CCTACCAGTCTTCGTC_18	Background
CCTACCAGTTCTGTTT_20	Background
CCTACCAGTTTGACAC_14	Background
CCTACCATCCAACCAA_14	Background
CCTACCATCTTAACCT_19	High-Risk
CCTACCATCTTCGAGA_20	Background
CCTAGCTAGACAGAGA_18	Background
CCTAGCTCAGCCTTTC_14	Background
CCTAGCTGTACAGTGG_20	Background
CCTAGCTGTCCTGCTT_18	High-Risk
CCTAGCTGTGATAAGT_15	Background
CCTAGCTGTGTGGCTC_13	Background
CCTAGCTGTTCTGTTT_13	Background
CCTAGCTGTTGATTGC_20	Background
CCTAGCTTCCAAGTAC_14	High-Risk
CCTAGCTTCCAAGTAC_15	High-Risk
CCTATTACAAAGAATC_19	Background
CCTATTACACCAGGCT_18	Background
CCTATTAGTATTCTCT_16	Background
CCTATTAGTTACGCGC_20	High-Risk
CCTATTATCATAAAGG_15	Background
CCTCAGTAGCCGTCGT_19	Background
CCTCAGTAGGGCTTGA_19	Background
CCTCAGTCACCGTTGG_15	Background
CCTCAGTTCAAGATCC_19	Background
CCTCAGTTCATCTGTT_20	Background
CCTCTGAAGCAGCCTC_20	Background
CCTCTGAAGCTGAAAT_20	Background
CCTCTGAAGTCAAGGC_20	Background
CCTCTGAAGTTCGCAT_19	Background
CCTCTGAGTATGGTTC_20	High-Risk
CCTCTGAGTGTCCTCT_20	Background
CCTCTGAGTTCCTCCA_19	High-Risk
CCTCTGATCAGCTTAG_14	High-Risk
CCTCTGATCTGTACGA_20	Background
CCTTACGAGGGCATGT_14	Background
CCTTACGAGTCGCCGT_19	Background
CCTTACGCAGGCTGAA_20	Background
CCTTACGGTGAGTGAC_13	Background
CCTTACGTCTCTGAGA_19	Background
CCTTCCCAGAGTAATC_20	Background
CCTTCCCAGATCTGAA_18	Background
CCTTCCCCAATCAGAA_18	Background
CCTTCCCCACTCTGTC_19	Background
CCTTCCCTCCAAACAC_20	High-Risk
CCTTCCCTCCAGATCA_13	Background
CCTTCCCTCGATCCCT_20	Background
CCTTCCCTCGTGGACC_19	Background
CCTTCCCTCTGTCTAT_14	Background
CCTTCGAAGGAGTTGC_15	Background
CCTTCGACACATTTCT_14	Background
CCTTCGACACCATCCT_18	Background
CCTTCGACAGTAAGCG_19	High-Risk
CCTTCGAGTCCATGAT_16	Background
CCTTCGATCGAATGGG_20	Background
CCTTCGATCGGTCTAA_13	Background
CCTTCGATCTGACCTC_20	Background
CCTTCGATCTTCCTTC_20	High-Risk
CCTTTCTAGACAGAGA_18	Background
CCTTTCTAGAGTAAGG_19	Background
CCTTTCTAGCACCGCT_19	Background
CCTTTCTAGTTTGCGT_20	Background
CCTTTCTCAAGACACG_15	High-Risk
CCTTTCTCACCTGGTG_14	Background
CCTTTCTGTAGCAAAT_19	Background
CCTTTCTGTCTAGTCA_14	Background
CCTTTCTGTTACGCGC_20	Background
CCTTTCTTCAAACCGT_15	Background
CCTTTCTTCACGCATA_20	Background
CCTTTCTTCCCATTAT_20	Background
CCTTTCTTCTCCGGTT_20	Background
CCTTTCTTCTGGCGAC_20	Background
CGAACATAGCTCAACT_15	Background
CGAACATCAGATCTGT_20	Background
CGAACATCAGTATGCT_20	Background
CGAACATCATGCAACT_20	High-Risk
CGAACATCATGTAAGA_20	Background
CGAACATGTACCGTAT_18	Background
CGAACATGTATAATGG_19	High-Risk
CGAACATTCGGTCTAA_20	Background
CGAACATTCGTCCAGG_20	Background
CGAATGTAGACTAGGC_15	High-Risk
CGAATGTAGTGACATA_20	Background
CGAATGTCATACAGCT_19	Background
CGAATGTCATATGAGA_19	Background
CGAATGTGTCAGCTAT_20	Background
CGAATGTGTTCGTGAT_15	Background
CGAATGTTCAACGCTA_15	Background
CGAATGTTCAATAAGG_19	Background
CGACCTTAGATCCCGC_20	Background
CGACCTTAGCACACAG_13	High-Risk
CGACCTTAGCACACAG_14	High-Risk
CGACCTTAGTGAATTG_20	Background
CGACCTTCACCCTATC_20	Background
CGACCTTCACCTGGTG_20	Background
CGACCTTCATAGTAAG_20	Background
CGACCTTGTCTCGTTC_15	Background
CGACCTTGTGTTGAGG_13	Background
CGACCTTGTTAAGAAC_20	Background
CGACCTTGTTTAGCTG_19	High-Risk
CGACTTCAGCGATATA_20	Background
CGACTTCAGGTGCAAC_14	Background
CGACTTCCACTGTGTA_20	Background
CGACTTCCAGGGTTAG_14	Background
CGACTTCCAGTATCTG_20	Background
CGACTTCTCAGGCGAA_19	Background
CGACTTCTCTGGCGTG_19	High-Risk
CGAGAAGAGGAGTAGA_19	Background
CGAGAAGAGTCCAGGA_13	Background
CGAGAAGAGTGAAGAG_20	Background
CGAGAAGAGTGGGATC_18	Background
CGAGAAGCACAACGCC_19	Background
CGAGAAGCACATCTTT_16	Background
CGAGAAGGTACCGAGA_19	Background
CGAGAAGGTCCATGAT_20	Background
CGAGAAGTCACGCGGT_13	Background
CGAGAAGTCCACGCAG_20	Background
CGAGAAGTCGTAGGAG_14	Background
CGAGAAGTCGTTGACA_18	High-Risk
CGAGCACAGCAGGCTA_20	Background
CGAGCACAGGGAGTAA_20	Background
CGAGCACAGTTTAGGA_20	Background
CGAGCACCAAATACAG_16	Background
CGAGCACGTCTCTCTG_14	High-Risk
CGAGCACGTTGGTTTG_14	Background
CGAGCACTCACATACG_18	Background
CGAGCACTCGTTGACA_18	Background
CGAGCCAAGAACTGTA_20	Background
CGAGCCAAGCGATCCC_20	Background
CGAGCCAAGCGATGAC_20	Background
CGAGCCACAGAAGCAC_13	Background
CGAGCCACAGAAGCAC_14	Background
CGAGCCACAGTTAACC_15	Background
CGAGCCAGTCGAATCT_20	Background
CGAGCCAGTCGCTTCT_18	High-Risk
CGAGCCAGTTAGGGTG_18	Background
CGAGCCATCAACACTG_16	Background
CGATCGGAGCTAGTTC_18	Background
CGATCGGAGGGAGTAA_13	Background
CGATCGGAGGGAGTAA_14	Background
CGATCGGCAATCCAAC_13	Background
CGATCGGGTCGATTGT_19	Background
CGATCGGGTGTGACCC_19	Background
CGATCGGGTTGTCGCG_20	Background
CGATCGGTCGAGCCCA_19	Background
CGATGGCAGCGATATA_18	Background
CGATGGCAGGGTTTCT_20	Background
CGATGGCCACAACGTT_19	Background
CGATGGCCACATTTCT_19	Background
CGATGGCCACGGTAAG_13	Background
CGATGGCGTAAGTTCC_18	Background
CGATGGCGTCCGTTAA_20	Background
CGATGGCGTGAAATCA_15	High-Risk
CGATGGCGTGATGTGG_20	Background
CGATGGCTCGTCACGG_19	Background
CGATGTAAGGAATTAC_15	High-Risk
CGATGTAAGTAGCGGT_13	High-Risk
CGATGTACATGCGCAC_14	Background
CGATGTACATTCTTAC_15	High-Risk
CGATGTAGTCCGCTGA_19	High-Risk
CGATGTAGTCTAGTGT_14	Background
CGATGTAGTTGAGTTC_13	Background
CGATGTATCTCAAACG_18	Background
CGATTGACAATTGCTG_19	Background
CGATTGATCAACGCTA_20	Background
CGATTGATCGCGTAGC_19	High-Risk
CGATTGATCGTACGGC_15	Background
CGCCAAGAGCGTGAAC_15	Background
CGCCAAGAGGAATTAC_19	Background
CGCCAAGCAAGAGGCT_19	Background
CGCCAAGCAAGCCATT_13	Background
CGCCAAGCAGTAGAGC_20	Background
CGCCAAGGTCGCATCG_19	Background
CGCCAAGGTCTCCCTA_19	Background
CGCCAAGGTTGTGGAG_14	Background
CGCCAAGTCATGTGGT_20	Background
CGCGGTAAGTCTCGGC_20	Background
CGCGGTAAGTTCCACA_15	Background
CGCGGTAAGTTGCAGG_19	Background
CGCGGTAAGTTTAGGA_20	High-Risk
CGCGGTACACGACGAA_13	Background
CGCGGTACATCTACGA_20	Background
CGCGGTAGTTAAAGAC_18	Background
CGCGGTATCATGCATG_14	Background
CGCGGTATCCGCTGTT_20	Background
CGCGGTATCCGTTGCT_13	Background
CGCGGTATCGCGTTTC_18	Background
CGCGTTTAGACTAGGC_19	Background
CGCGTTTAGATCGATA_18	Background
CGCGTTTAGTGAACAT_13	Background
CGCGTTTGTAAAGTCA_20	Background
CGCGTTTGTCGAATCT_20	High-Risk
CGCGTTTTCTGTTGAG_19	Background
CGCTATCAGACGCAAC_13	Background
CGCTATCCAAATCCGT_19	Background
CGCTGGACATACTCTT_20	Background
CGCTGGACATCTATGG_19	High-Risk
CGCTGGAGTCGCGGTT_19	Background
CGCTGGATCAAACAAG_15	High-Risk
CGCTGGATCGTCCAGG_15	Background
CGCTTCAAGCTGAACG_14	Background
CGCTTCAAGGACCACA_20	Background
CGCTTCAAGTAATCCC_20	Background
CGCTTCACAGGAACGT_20	Background
CGCTTCACATCGGTTA_13	Background
CGCTTCACATCGGTTA_14	Background
CGCTTCACATTCACTT_20	Background
CGCTTCAGTACCTACA_15	Background
CGCTTCAGTACGCTGC_20	High-Risk
CGCTTCAGTCTAGCCG_15	Background
CGCTTCAGTCTCACCT_19	Background
CGCTTCAGTGAAAGAG_19	Background
CGCTTCAGTTACCAGT_18	Background
CGCTTCATCACAGGCC_20	Background
CGCTTCATCGCTTGTC_18	Background
CGGACACAGCCTTGAT_13	Background
CGGACACCAAACAACA_14	Background
CGGACACCAGACGCCT_20	Background
CGGACACCATACTACG_20	High-Risk
CGGACACGTAATTGGA_18	High-Risk
CGGACACGTTCCAACA_20	High-Risk
CGGACGTAGGAGTTGC_20	Background
CGGACGTAGTCACGCC_18	Background
CGGACGTCACGTAAGG_19	High-Risk
CGGACGTCACTATCTT_15	High-Risk
CGGACGTCAGATAATG_20	Background
CGGACGTCATCCCATC_14	Background
CGGACGTCATGAAGTA_20	Background
CGGACGTGTTCTGAAC_20	High-Risk
CGGACGTTCATGCAAC_13	Background
CGGACTGCACGCCAGT_14	Background
CGGACTGCAGTTTACG_20	Background
CGGACTGGTAAACCTC_13	Background
CGGACTGGTACCCAAT_13	High-Risk
CGGACTGGTAGAGCTG_18	Background
CGGACTGGTCCGTGAC_14	Background
CGGACTGGTCGGCACT_20	Background
CGGACTGTCAACTCTT_20	Background
CGGACTGTCGCCATAA_19	Background
CGGACTGTCTGTCTCG_20	Background
CGGACTGTCTTACCGC_18	Background
CGGAGCTCACGGCTAC_20	Background
CGGAGCTCAGCCTGTG_15	Background
CGGAGCTGTACGCACC_20	Background
CGGAGCTGTACTCGCG_19	Background
CGGAGCTGTATAAACG_20	Background
CGGAGCTTCATCACCC_19	Background
CGGAGCTTCATCTGTT_15	Background
CGGAGCTTCTCGGACG_18	High-Risk
CGGAGTCCACGGATAG_19	Background
CGGAGTCCAGGGATTG_20	Background
CGGAGTCGTCGGGTCT_20	Background
CGGAGTCGTTAAGACA_19	Background
CGGAGTCTCACCATAG_20	Background
CGGAGTCTCGCTTAGA_15	Background
CGGCTAGAGAGCTGGT_19	Background
CGGCTAGAGCCGATTT_18	Background
CGGCTAGAGGAATTAC_18	High-Risk
CGGCTAGAGGGATACC_15	Background
CGGCTAGAGTTCCACA_13	Background
CGGCTAGCAGGTGCCT_20	Background
CGGCTAGGTAATTGGA_18	Background
CGGCTAGGTGAGCGAT_20	Background
CGGCTAGGTTTGACTG_20	Background
CGGCTAGTCATCGATG_20	Background
CGGCTAGTCCAGGGCT_19	Background
CGGGTCAAGACCTAGG_19	Background
CGGGTCAAGGGTTCCC_19	Background
CGGGTCAAGTTAGCGG_20	Background
CGGGTCACAGACGTAG_19	Background
CGGGTCACAGAGTGTG_15	Background
CGGGTCACAGCGAACA_19	Background
CGGGTCACAGCTGCAC_19	Background
CGGGTCACATCCTTGC_19	Background
CGGGTCAGTCTTGATG_19	Background
CGGGTCAGTTGCCTCT_14	Background
CGGGTCATCGCTTAGA_20	Background
CGGGTCATCTCTAAGG_19	Background
CGGGTCATCTGCCAGG_18	Background
CGGTTAACAAAGCGGT_20	Background
CGGTTAACAACTTGAC_19	Background
CGGTTAACACCGAAAG_13	Background
CGGTTAACAGCCTGTG_20	Background
CGGTTAACATACTCTT_20	Background
CGGTTAAGTAACGTTC_13	Background
CGGTTAAGTATAGGGC_20	Background
CGGTTAAGTCGACTAT_13	Background
CGGTTAAGTCTGATTG_19	Background
CGTAGCGAGAATCTCC_19	Background
CGTAGCGAGCAGACTG_20	Background
CGTAGCGAGGAATCGC_20	Background
CGTAGCGCATTATCTC_19	Background
CGTAGCGGTGTTGAGG_16	High-Risk
CGTAGCGTCCTGCCAT_20	Background
CGTAGCGTCGCAAGCC_13	High-Risk
CGTAGGCCATCGGAAG_19	Background
CGTAGGCCATTTCAGG_20	Background
CGTAGGCTCAACTCTT_19	Background
CGTAGGCTCCTCATTA_15	Background
CGTCACTAGCTAGGCA_20	Background
CGTCACTAGGGAAACA_15	Background
CGTCACTAGTGGAGTC_19	Background
CGTCACTCAGGCTGAA_15	High-Risk
CGTCACTGTAAGCACG_20	Background
CGTCACTGTAGAGCTG_15	Background
CGTCACTGTCGCGAAA_19	Background
CGTCACTGTGGCAAAC_14	Background
CGTCACTGTTGGGACA_20	Background
CGTCAGGAGACAGGCT_18	Background
CGTCAGGAGCGTAGTG_15	Background
CGTCAGGAGGCCGAAT_15	Background
CGTCAGGAGGTTACCT_19	Background
CGTCAGGCAGGTGCCT_20	Background
CGTCAGGGTAGAAGGA_15	High-Risk
CGTCAGGGTCGAGATG_19	High-Risk
CGTCAGGGTCTCGTTC_13	Background
CGTCAGGGTCTCGTTC_14	Background
CGTCCATAGAGGTTGC_20	Background
CGTCCATAGGGATGGG_20	Background
CGTCCATCAAGACGTG_20	Background
CGTCCATCACCGATAT_19	Background
CGTCCATTCACTGGGC_20	Background
CGTCCATTCGGCGCTA_20	Background
CGTCTACAGCTGGAAC_20	Background
CGTCTACAGGTGTTAA_19	Background
CGTCTACCAATTGCTG_20	Background
CGTCTACCATCCCACT_20	High-Risk
CGTCTACGTCATGCAT_19	High-Risk
CGTCTACTCATGTCTT_19	High-Risk
CGTGAGCAGAGTCGGT_15	High-Risk
CGTGAGCAGTGAATTG_16	Background
CGTGAGCCAATGACCT_16	Background
CGTGAGCGTACATCCA_20	Background
CGTGAGCGTATAGGTA_20	Background
CGTGAGCTCGAACGGA_20	Background
CGTGTAAAGATATGCA_20	Background
CGTGTAAAGCGTGAGT_20	Background
CGTGTAACACAGAGGT_19	High-Risk
CGTGTAACAGTACACT_15	High-Risk
CGTGTCTAGAAAGTGG_14	Background
CGTGTCTAGGCATGTG_15	High-Risk
CGTGTCTAGTTGAGAT_13	Background
CGTGTCTCACCGGAAA_14	Background
CGTGTCTCAGATAATG_19	Background
CGTGTCTCAGTCCTTC_15	Background
CGTGTCTGTAAGAGAG_19	Background
CGTGTCTTCCACTCCA_16	Background
CGTTAGACAAGCTGAG_20	Background
CGTTAGACATCACGAT_20	Background
CGTTCTGAGTCCCACG_18	Background
CGTTCTGAGTGAACAT_14	Background
CGTTCTGAGTGTTGAA_15	Background
CGTTCTGCATGCCCGA_19	Background
CGTTCTGGTAGTGAAT_13	High-Risk
CGTTCTGGTAGTGAAT_14	Background
CGTTCTGGTCTAGTCA_19	High-Risk
CGTTCTGGTCTCATCC_13	Background
CGTTCTGTCACGATGT_15	Background
CGTTCTGTCGAGGTAG_18	Background
CGTTCTGTCGCCGTGA_14	Background
CGTTGGGAGGAGTTTA_20	Background
CGTTGGGAGGATGGAA_15	High-Risk
CGTTGGGAGGCGCTCT_19	Background
CGTTGGGCAGTCAGAG_20	Background
CGTTGGGCATATACGC_19	Background
CGTTGGGTCCACGCAG_20	Background
CGTTGGGTCGAACGGA_18	Background
CGTTGGGTCTTTACAC_13	Background
CTAACTTAGAGGTTAT_15	Background
CTAACTTAGCTGAACG_20	Background
CTAACTTAGGGATGGG_15	Background
CTAACTTGTAGCTAAA_20	Background
CTAACTTTCAGTACGT_20	Background
CTAAGACAGAGGACGG_19	Background
CTAAGACAGCGTAGTG_15	High-Risk
CTAAGACAGGATGTAT_15	Background
CTAAGACGTATATGGA_15	Background
CTAAGACGTGCGGTAA_20	Background
CTAAGACGTTCGTGAT_20	Background
CTAAGACTCAACGCTA_20	Background
CTAAGACTCACTCCTG_14	Background
CTAAGACTCCGAGCCA_20	Background
CTAAGACTCGTTGACA_19	High-Risk
CTAATGGAGAGGGATA_20	Background
CTAATGGAGGAATGGA_13	Background
CTAATGGAGGCACATG_15	Background
CTAATGGAGTGTGGCA_13	Background
CTAATGGCAGGCTCAC_15	High-Risk
CTAATGGGTATCGCAT_15	Background
CTAATGGGTATGAATG_20	Background
CTAATGGGTTAGATGA_14	Background
CTAATGGTCGAGGTAG_20	Background
CTAATGGTCGTAGGTT_13	Background
CTAATGGTCGTTTGCC_19	High-Risk
CTACACCAGCCAGGAT_13	Background
CTACACCAGCTAGCCC_13	Background
CTACACCGTGGTAACG_20	Background
CTACACCTCAGCAACT_16	Background
CTACATTAGTGGGCTA_20	Background
CTACATTCAATCCAAC_18	Background
CTACATTCAGGAATGC_15	Background
CTACATTTCCTTTACA_13	Background
CTACATTTCTACTTAC_18	Background
CTACATTTCTTGTCAT_19	High-Risk
CTACCCAAGTAGCCGA_20	Background
CTACCCACACCAGATT_13	Background
CTACCCACACCAGATT_14	Background
CTACCCACACCATCCT_19	Background
CTACCCACAGATCGGA_20	Background
CTACCCAGTATAGTAG_20	Background
CTACCCAGTGTGTGCC_20	Background
CTACCCAGTTTAAGCC_20	Background
CTACCCATCAACCAAC_20	Background
CTACCCATCCAGGGCT_20	Background
CTACGTCAGACGCAAC_19	Background
CTACGTCAGCCATCGC_20	Background
CTACGTCAGCCCTAAT_14	High-Risk
CTACGTCAGCCCTAAT_20	Background
CTACGTCAGGACTGGT_20	Background
CTACGTCCACAGTCGC_15	Background
CTACGTCCATCGGTTA_20	Background
CTACGTCGTAGATTAG_18	Background
CTACGTCGTAGGAGTC_20	High-Risk
CTACGTCGTCTAGAGG_15	Background
CTACGTCTCGGTGTTA_18	Background
CTACGTCTCGTACGGC_13	High-Risk
CTACGTCTCGTACGGC_14	Background
CTACGTCTCTAGCACA_15	Background
CTAGAGTAGCAGATCG_20	Background
CTAGAGTAGGCTAGAC_19	Background
CTAGAGTAGGTAGCTG_18	Background
CTAGAGTGTCAAACTC_19	Background
CTAGAGTTCATTTGGG_16	Background
CTAGAGTTCCCGGATG_14	High-Risk
CTAGAGTTCCGCATCT_14	Background
CTAGAGTTCGTTTAGG_15	High-Risk
CTAGCCTAGACACGAC_20	Background
CTAGCCTAGGAGTACC_19	Background
CTAGCCTAGGTGCACA_20	High-Risk
CTAGCCTCAAGGACTG_19	Background
CTAGCCTCAAGGGTCA_15	Background
CTAGCCTCAGGCGATA_20	Background
CTAGCCTCATGGTCTA_13	Background
CTAGCCTGTAGCTAAA_19	High-Risk
CTAGCCTGTCAGATAA_20	Background
CTAGCCTGTTCTGTTT_20	Background
CTAGCCTTCACATAGC_19	High-Risk
CTAGCCTTCTGCGGCA_19	High-Risk
CTAGCCTTCTTGCAAG_20	Background
CTAGTGAAGACTAAGT_13	Background
CTAGTGAAGACTAAGT_14	Background
CTAGTGAGTAGCCTCG_19	Background
CTCACACAGTGACATA_13	Background
CTCACACCACCAGCAC_20	Background
CTCACACCATCGATTG_19	High-Risk
CTCACACGTCATATGC_20	Background
CTCACACTCAACGGCC_13	Background
CTCACACTCCCTCTTT_13	Background
CTCAGAAAGCGCCTTG_20	High-Risk
CTCAGAAAGGATGGAA_14	Background
CTCAGAAAGGCAGTCA_19	Background
CTCAGAACAATCAGAA_14	High-Risk
CTCAGAAGTACAGACG_18	High-Risk
CTCAGAAGTAGCAAAT_20	Background
CTCAGAAGTCAAAGCG_15	Background
CTCAGAAGTCGCATCG_13	Background
CTCAGAAGTCGCATCG_14	High-Risk
CTCAGAAGTGGGTCAA_19	Background
CTCAGAAGTTGATTGC_14	High-Risk
CTCAGAAGTTGATTGC_15	High-Risk
CTCAGAATCAGTCAGT_19	Background
CTCAGAATCTCGATGA_13	Background
CTCAGAATCTGTTGAG_19	Background
CTCATTAAGAGGTACC_18	Background
CTCATTACAGACACTT_19	Background
CTCATTACATCGGACC_20	Background
CTCATTAGTTCGTTGA_20	Background
CTCATTATCGCATGGC_20	High-Risk
CTCCTAGAGTTAAGTG_20	Background
CTCCTAGCAAGAAGAG_19	Background
CTCCTAGCAGGCTGAA_18	Background
CTCCTAGCATACTACG_20	Background
CTCCTAGGTCGCTTTC_20	Background
CTCCTAGGTCTCTTTA_19	Background
CTCCTAGGTCTTCGTC_20	Background
CTCCTAGTCAATCACG_13	High-Risk
CTCCTAGTCACGATGT_19	Background
CTCCTAGTCGTAGGTT_19	Background
CTCGAAAAGTGTACTC_20	High-Risk
CTCGAAACAAACTGCT_19	Background
CTCGAAACATCTACGA_14	High-Risk
CTCGAAACATGCATGT_18	Background
CTCGAAAGTAAATGAC_19	High-Risk
CTCGAAAGTAGCGATG_15	Background
CTCGAAAGTGCACGAA_20	Background
CTCGAAAGTGTGGCTC_15	Background
CTCGAAATCACATACG_14	High-Risk
CTCGAAATCACTTATC_20	Background
CTCGAGGAGCAGCGTA_20	Background
CTCGAGGAGGTCATCT_20	Background
CTCGAGGCATCCTAGA_19	Background
CTCGAGGCATTGGCGC_20	Background
CTCGAGGGTTCCGGCA_18	Background
CTCGAGGGTTCGAATC_20	Background
CTCGAGGTCAGTGCAT_20	Background
CTCGAGGTCGATGAGG_19	Background
CTCGAGGTCTTGTACT_20	Background
CTCGGAGCAAGAGTCG_13	Background
CTCGGAGCACGCTTTC_14	High-Risk
CTCGGAGCAGTCGATT_20	Background
CTCGGAGGTAAAGGAG_19	Background
CTCGGAGTCACATGCA_20	Background
CTCGGAGTCCGGCACA_20	Background
CTCGGAGTCCTTGACC_20	Background
CTCGGAGTCTCCCTGA_20	Background
CTCGGGACACTTAACG_13	Background
CTCGGGAGTACTTCTT_13	Background
CTCGGGAGTCTTGATG_14	Background
CTCGGGATCGTCCGTT_20	High-Risk
CTCGTACAGAACTGTA_19	Background
CTCGTACAGCGACGTA_20	High-Risk
CTCGTACGTCGCGAAA_20	Background
CTCGTACGTTTGGCGC_19	Background
CTCGTACTCATCGATG_14	High-Risk
CTCGTACTCATCGATG_15	High-Risk
CTCGTACTCGCGTTTC_18	Background
CTCGTCAAGTGGGATC_13	High-Risk
CTCGTCACAATGGAGC_20	Background
CTCGTCACACAGGCCT_20	Background
CTCGTCACACGTAAGG_19	Background
CTCGTCACAGTGACAG_13	Background
CTCGTCAGTACGACCC_15	High-Risk
CTCGTCAGTCCAGTGC_19	High-Risk
[truncated: 2,103 more rows]

## Sheet: 3. scAB Cell Labels
Cell	Label
AAACCTGAGACTACAA_15	Background
AAACCTGAGACTTGAA_20	Background
AAACCTGAGCGCCTTG_15	Background
AAACCTGCAGCTATTG_19	Background
AAACCTGCAGTAAGCG_15	High-Risk
AAACCTGGTGGCGAAT_20	High-Risk
AAACCTGTCACCGGGT_20	Background
AAACGGGAGCAGACTG_19	Background
AAACGGGAGTCCATAC_19	Background
AAACGGGAGTGCCATT_14	Background
AAACGGGCACTGCCAG_15	Background
AAACGGGGTACGACCC_19	Background
AAACGGGGTATATGGA_19	Background
AAACGGGTCACATACG_19	Background
AAACGGGTCTCGCTTG_14	Background
AAACGGGTCTGCTGTC_20	Background
AAAGATGAGACTGGGT_19	Background
AAAGATGAGTGGGATC_19	Background
AAAGATGCACAGGCCT_19	High-Risk
AAAGATGGTTTGTTGG_20	Background
AAAGCAAAGCTGTCTA_19	Background
AAAGCAAAGGCTCATT_19	Background
AAAGCAACACCACCAG_16	Background
AAAGCAACATCGGGTC_15	High-Risk
AAAGCAACATCGGTTA_20	Background
AAAGCAAGTACATGTC_20	Background
AAAGCAAGTTCGAATC_14	Background
AAAGCAATCAACGAAA_15	Background
AAAGTAGAGAATTGTG_20	High-Risk
AAAGTAGAGGAGCGAG_19	High-Risk
AAAGTAGAGTCAAGCG_20	Background
AAAGTAGAGTCCATAC_14	High-Risk
AAAGTAGAGTCCATAC_15	Background
AAAGTAGCAACTGCTA_18	Background
AAAGTAGCAAGCCTAT_19	Background
AAAGTAGGTAAGTTCC_20	Background
AAAGTAGGTCTAAACC_19	Background
AAAGTAGGTGTATGGG_18	Background
AAAGTAGTCATACGGT_18	Background
AAAGTAGTCCACGACG_19	Background
AAAGTAGTCCCTAATT_14	Background
AAATGCCAGGACATTA_20	High-Risk
AAATGCCCAAATACAG_15	Background
AAATGCCCACGTCAGC_13	Background
AAATGCCGTAGTAGTA_15	Background
AAATGCCGTTGGAGGT_18	Background
AAATGCCTCAACGGGA_19	Background
AAATGCCTCAGTGTTG_18	High-Risk
AAATGCCTCATATCGG_20	Background
AAATGCCTCCCGACTT_19	Background
AAATGCCTCCCTGACT_20	Background
AACACGTAGCTGAAAT_20	High-Risk
AACACGTAGTAGGTGC_14	Background
AACACGTCAACGCACC_19	Background
AACACGTCACATGGGA_15	Background
AACACGTCACGTCAGC_20	High-Risk
AACACGTCAGTATAAG_14	Background
AACACGTGTACAGTTC_20	Background
AACACGTGTCCGTGAC_19	Background
AACACGTGTCTAACGT_19	Background
AACACGTGTGATAAAC_15	Background
AACACGTTCAGCAACT_18	Background
AACACGTTCGTACCGG_15	Background
AACACGTTCTCGTTTA_15	High-Risk
AACCATGCATCTCCCA_19	Background
AACCATGTCACGATGT_13	Background
AACCATGTCACGATGT_14	High-Risk
AACCATGTCTTAGCCC_14	Background
AACCATGTCTTAGCCC_15	Background
AACCGCGAGCTGCGAA_20	Background
AACCGCGAGGACTGGT_18	High-Risk
AACCGCGGTACCGTAT_15	Background
AACCGCGGTGACGGTA_14	Background
AACCGCGTCCTCGCAT_19	Background
AACGTTGAGACGACGT_20	High-Risk
AACGTTGAGATATACG_19	Background
AACGTTGAGCTTCGCG_19	Background
AACGTTGAGTATGACA_19	Background
AACGTTGAGTGTGAAT_19	High-Risk
AACGTTGAGTTGAGAT_20	Background
AACGTTGCAACCGCCA_19	Background
AACGTTGCAAGCCCAC_14	High-Risk
AACGTTGCAAGCCCAC_16	High-Risk
AACGTTGCAAGGTTTC_20	Background
AACGTTGCAATGTAAG_18	High-Risk
AACGTTGCATTGGTAC_20	Background
AACGTTGTCGAATCCA_20	Background
AACTCAGAGAGTTGGC_20	Background
AACTCAGAGCAGACTG_13	Background
AACTCAGAGCAGACTG_14	High-Risk
AACTCAGAGGGTGTTG_13	High-Risk
AACTCAGCAAGGTTTC_15	High-Risk
AACTCAGCACGAAACG_20	Background
AACTCAGCATGGTTGT_19	Background
AACTCAGCATTCGACA_13	Background
AACTCAGGTGGTCCGT_20	Background
AACTCAGGTTCGGCAC_19	Background
AACTCAGGTTCGTCTC_13	Background
AACTCAGGTTCGTCTC_14	Background
AACTCAGTCAGGATCT_13	Background
AACTCAGTCCGCGGTA_19	Background
AACTCAGTCGAACTGT_16	High-Risk
AACTCAGTCGGTCCGA_18	High-Risk
AACTCCCAGCGCCTTG_19	High-Risk
AACTCCCAGCTAGTCT_14	Background
AACTCCCAGCTCCCAG_14	Background
AACTCCCAGGGTATCG_19	Background
AACTCCCCACCCAGTG_15	Background
AACTCCCCATATACCG_15	Background
AACTCCCGTAATAGCA_20	Background
AACTCCCGTAGCGCAA_20	Background
AACTCCCGTCAACTGT_20	High-Risk
AACTCCCGTCAGGACA_19	Background
AACTCCCTCCAGGGCT_20	Background
AACTCCCTCTCTTATG_15	Background
AACTCCCTCTGGTGTA_14	Background
AACTCTTAGAAACCGC_15	High-Risk
AACTCTTAGAAACCGC_16	Background
AACTCTTCACACCGAC_18	Background
AACTCTTCATAACCTG_20	Background
AACTCTTGTCCAGTGC_19	High-Risk
AACTCTTTCATAGCAC_18	Background
AACTCTTTCGAACTGT_20	High-Risk
AACTGGTAGCGTCTAT_20	Background
AACTGGTAGGTGCAAC_20	Background
AACTGGTAGTAGATGT_19	Background
AACTGGTAGTAGGCCA_20	Background
AACTGGTCATTGGTAC_19	High-Risk
AACTGGTGTCAGTGGA_15	High-Risk
AACTGGTTCACATACG_19	Background
AACTGGTTCGGAGCAA_14	Background
AACTTTCAGCTAACAA_19	Background
AACTTTCAGTGGACGT_20	Background
AACTTTCTCCTAGAAC_20	High-Risk
AACTTTCTCTTGTATC_15	High-Risk
AAGACCTAGCGTTGCC_19	Background
AAGACCTAGCTGCAAG_20	Background
AAGACCTCACCCTATC_20	Background
AAGACCTTCAAAGACA_20	Background
AAGACCTTCGCAGGCT_13	Background
AAGACCTTCGCAGGCT_14	High-Risk
AAGACCTTCTGAGTGT_14	Background
AAGCCGCAGTTTAGGA_20	High-Risk
AAGCCGCCACTTAAGC_20	Background
AAGCCGCGTTGGTAAA_14	Background
AAGCCGCGTTGTGGCC_13	Background
AAGCCGCGTTGTGGCC_14	High-Risk
AAGCCGCTCCACGTTC_19	High-Risk
AAGCCGCTCCGCGTTT_19	Background
AAGCCGCTCGCGCCAA_19	Background
AAGCCGCTCTGCGGCA_20	Background
AAGGAGCCAATGGACG_19	High-Risk
AAGGAGCGTCAGCTAT_13	High-Risk
AAGGAGCGTCCTAGCG_20	Background
AAGGAGCGTTAAGATG_19	High-Risk
AAGGAGCGTTATCGGT_13	Background
AAGGAGCGTTATCGGT_14	High-Risk
AAGGAGCTCACGCGGT_19	Background
AAGGAGCTCAGCTTAG_15	High-Risk
AAGGAGCTCGGTTCGG_14	Background
AAGGAGCTCTACCTGC_20	Background
AAGGCAGAGGGTATCG_15	Background
AAGGCAGAGTACGCGA_20	Background
AAGGCAGCATGCCTAA_20	High-Risk
AAGGCAGCATGGTTGT_19	High-Risk
AAGGCAGGTCCAACTA_20	Background
AAGGCAGGTGCTGTAT_20	High-Risk
AAGGCAGGTGGTACAG_15	Background
AAGGCAGGTTATGTGC_20	Background
AAGGCAGTCAACACCA_16	Background
AAGGTTCAGCTAGTTC_13	Background
AAGGTTCCACAGACAG_20	High-Risk
AAGGTTCCACAGAGGT_19	Background
AAGGTTCCACGGTAAG_20	Background
AAGGTTCGTCCGAGTC_20	Background
AAGGTTCGTGAGCGAT_19	Background
AAGTCTGAGAGGACGG_20	High-Risk
AAGTCTGAGATATGGT_20	Background
AAGTCTGAGCTAGTTC_15	Background
AAGTCTGAGGTAGCCA_19	High-Risk
AAGTCTGCACGAGAGT_13	Background
AAGTCTGCAGTCCTTC_20	High-Risk
AAGTCTGCATAGGATA_19	Background
AAGTCTGTCCCGGATG_13	Background
AAGTCTGTCCCGGATG_14	High-Risk
AAGTCTGTCTCGTTTA_14	Background
AATCCAGAGCGAAGGG_14	Background
AATCCAGAGGCCATAG_18	Background
AATCCAGCAACAACCT_18	Background
AATCCAGCAGACAGGT_20	High-Risk
AATCCAGGTTAAGGGC_19	Background
AATCCAGTCTGTCCGT_20	High-Risk
AATCGGTAGCAAATCA_14	Background
AATCGGTAGCTGCCCA_15	Background
AATCGGTCAGGGTACA_15	Background
AATCGGTCAGTAGAGC_15	Background
AATCGGTTCAGTTAGC_14	High-Risk
AATCGGTTCAGTTAGC_15	High-Risk
AATCGGTTCGAGCCCA_18	Background
AATCGGTTCGGGAGTA_19	High-Risk
AATCGGTTCTCGCTTG_20	Background
ACACCAAAGCGATTCT_15	Background
ACACCAACAAGCCCAC_20	Background
ACACCAACACTAGTAC_18	Background
ACACCAACAGACGCCT_19	Background
ACACCAAGTGCACGAA_20	Background
ACACCAATCATAGCAC_18	High-Risk
ACACCAATCTACCTGC_15	Background
ACACCCTAGAATCTCC_13	High-Risk
ACACCCTCATCAGTCA_13	Background
ACACCCTCATGATCCA_19	Background
ACACCCTCATGTAGTC_15	Background
ACACCCTGTCCATCCT_20	High-Risk
ACACCCTGTTGCTCCT_15	Background
ACACCCTTCAAACCAC_14	Background
ACACCCTTCAGAGGTG_19	Background
ACACCCTTCCAAATGC_20	Background
ACACCCTTCTCTGCTG_14	Background
ACACCGGAGCTGTTCA_18	Background
ACACCGGCAGGCTCAC_20	Background
ACACCGGGTACAAGTA_20	High-Risk
ACACTGAAGAACTGTA_20	Background
ACACTGAAGACTAAGT_20	Background
ACACTGAAGCCATCGC_13	Background
ACACTGAAGCCATCGC_14	High-Risk
ACACTGAAGCGCTCCA_20	High-Risk
ACACTGAAGCGTCTAT_20	Background
ACACTGAAGGAATTAC_19	Background
ACACTGAAGGTACTCT_20	Background
ACACTGACACCCATTC_19	Background
ACACTGACATCACAAC_19	Background
ACACTGACATCGGAAG_20	High-Risk
ACACTGAGTAGCCTAT_18	Background
ACACTGATCACCCTCA_16	Background
ACACTGATCAGTTAGC_19	High-Risk
ACAGCCGAGAAACCAT_15	Background
ACAGCCGAGAATTCCC_15	Background
ACAGCCGAGGCCCGTT_15	High-Risk
ACAGCCGCACAGACTT_18	Background
ACAGCCGCACGTTGGC_19	Background
ACAGCCGCATGTTGAC_15	Background
ACAGCCGGTAAACCTC_19	Background
ACAGCCGGTTGCGCAC_15	Background
ACAGCCGTCATTATCC_20	High-Risk
ACAGCTAAGATGAGAG_15	Background
ACAGCTAAGATTACCC_20	High-Risk
ACAGCTAAGCTCCTTC_20	High-Risk
ACAGCTAAGTGTTGAA_19	Background
ACAGCTACACAGCCCA_13	Background
ACAGCTACACAGCCCA_14	Background
ACAGCTACATAGTAAG_20	High-Risk
ACAGCTACATTGCGGC_20	Background
ACAGCTAGTTGAGGTG_15	Background
ACAGCTATCCAGAAGG_19	High-Risk
ACAGCTATCCTCCTAG_19	Background
ACAGCTATCGACAGCC_20	Background
ACAGCTATCGTTGACA_14	High-Risk
ACAGCTATCTCAACTT_19	High-Risk
ACAGCTATCTGATACG_20	Background
ACAGCTATCTTAACCT_20	High-Risk
ACAGCTATCTTCTGGC_20	High-Risk
ACATACGAGCGATATA_14	Background
ACATACGAGGACTGGT_14	Background
ACATACGAGGAGTCTG_15	Background
ACATACGAGGGTTTCT_20	Background
ACATACGAGTTAGGTA_18	High-Risk
ACATACGCACGACGAA_20	High-Risk
ACATACGGTACTTCTT_20	Background
ACATACGGTCTAGTGT_19	Background
ACATACGGTCTGCGGT_19	High-Risk
ACATACGGTCTTCGTC_20	Background
ACATACGTCGTTGACA_20	Background
ACATCAGAGTACATGA_20	Background
ACATCAGCAGCCAGAA_20	High-Risk
ACATCAGCATCATCCC_13	Background
ACATGGTAGCTAGCCC_14	Background
ACATGGTAGGGTTTCT_19	Background
ACATGGTAGTAGGCCA_20	High-Risk
ACATGGTAGTTTGCGT_20	Background
ACATGGTGTCGGATCC_15	Background
ACATGGTGTGGTGTAG_14	Background
ACATGGTTCTGTCTAT_19	Background
ACCAGTAAGACTTGAA_20	High-Risk
ACCAGTAAGAGTACAT_19	Background
ACCAGTAAGGTAAACT_20	High-Risk
ACCAGTAAGTTACGGG_20	Background
ACCAGTACAATGGAGC_18	Background
ACCAGTACAGGGTATG_13	High-Risk
ACCAGTATCGTAGATC_13	Background
ACCCACTAGGTAGCTG_19	Background
ACCCACTAGTCAATAG_19	High-Risk
ACCCACTCAGTGACAG_19	Background
ACCCACTCATGGGACA_19	Background
ACCCACTGTAATTGGA_19	Background
ACCCACTGTCCGTGAC_14	Background
ACCCACTGTTCAGGCC_13	Background
ACCCACTTCCACGACG_15	Background
ACCCACTTCCTGCTTG_20	High-Risk
ACCGTAAAGGCTAGAC_20	Background
ACCGTAAAGTAGTGCG_14	Background
ACCGTAAAGTGGAGAA_19	High-Risk
ACCGTAACACGGCCAT_14	Background
ACCGTAAGTTGTACAC_13	Background
ACCGTAAGTTGTACAC_14	Background
ACCGTAAGTTTGCATG_18	High-Risk
ACCGTAATCACCCTCA_19	Background
ACCGTAATCAGCTCGG_20	Background
ACCGTAATCATAGCAC_20	Background
ACCTTTAAGACGCAAC_20	High-Risk
ACCTTTAAGGTGTTAA_19	High-Risk
ACCTTTACAAGCGCTC_15	Background
ACCTTTACACAACGCC_19	Background
ACCTTTACAGCATACT_20	High-Risk
ACCTTTAGTGGTTTCA_20	High-Risk
ACGAGCCCAACACCTA_20	Background
ACGAGCCGTCAGCTAT_15	Background
ACGAGCCGTCTAGGTT_19	Background
ACGAGCCTCCTTGACC_20	Background
ACGAGGAAGAGTAAGG_20	High-Risk
ACGAGGAAGTGGAGTC_20	High-Risk
ACGAGGACAAGCCATT_20	Background
ACGAGGACACCAGGCT_20	High-Risk
ACGAGGACAGTAAGAT_15	Background
ACGAGGACATTGGTAC_18	Background
ACGAGGAGTCAATGTC_20	Background
ACGAGGATCCCATTAT_20	Background
ACGAGGATCCTGCTTG_19	Background
ACGATACAGTCCGTAT_20	Background
ACGATACCATATACGC_20	Background
ACGATACGTAAGGATT_19	High-Risk
ACGATACGTAATCGTC_19	High-Risk
ACGATACGTCAGGACA_19	High-Risk
ACGATACGTCCTCTTG_20	Background
ACGATACGTTATGCGT_14	Background
ACGATACTCAAACCGT_19	Background
ACGATACTCACGCGGT_14	Background
ACGATACTCCGATATG_13	Background
ACGATACTCCGCATCT_18	High-Risk
ACGATACTCCGTCATC_20	Background
ACGATACTCGAGAGCA_20	Background
ACGATGTCACTAAGTC_19	Background
ACGATGTGTCAAAGCG_20	Background
ACGATGTGTGCTCTTC_19	Background
ACGCAGCAGCACCGTC_19	Background
ACGCAGCAGGACAGCT_19	Background
ACGCAGCCAGGCTGAA_20	Background
ACGCAGCGTCGAGTTT_14	Background
ACGCAGCGTCTCTCGT_15	High-Risk
ACGCAGCGTGTTTGTG_13	Background
ACGCAGCGTGTTTGTG_14	High-Risk
ACGCAGCGTTTGTTTC_19	Background
ACGCAGCTCTTACCTA_20	High-Risk
ACGCCAGAGACACTAA_20	High-Risk
ACGCCAGAGAGGGATA_19	Background
ACGCCAGAGCAAATCA_19	High-Risk
ACGCCAGGTCAGAAGC_20	Background
ACGCCAGTCAATACCG_19	Background
ACGCCAGTCCTCCTAG_20	High-Risk
ACGCCGAAGATGTGGC_19	Background
ACGCCGACATCGGACC_19	Background
ACGCCGAGTAAATGAC_20	Background
ACGGAGAAGACGCAAC_15	Background
ACGGAGAAGCCCGAAA_19	High-Risk
ACGGAGAAGCTACCGC_19	Background
ACGGAGAAGGACAGAA_15	Background
ACGGAGACAAGAAGAG_19	Background
ACGGAGACACAGACAG_20	Background
ACGGAGACACTCTGTC_19	High-Risk
ACGGAGACATTAACCG_20	Background
ACGGAGAGTTACGCGC_19	High-Risk
ACGGAGAGTTTACTCT_19	Background
ACGGAGATCAACGGGA_19	High-Risk
ACGGAGATCCGATATG_13	Background
ACGGAGATCCTTTACA_19	Background
ACGGCCAAGTGAAGAG_18	Background
ACGGCCAAGTTAGCGG_19	High-Risk
ACGGCCAAGTTTAGGA_20	Background
ACGGCCACAAGCGAGT_13	High-Risk
ACGGCCACAAGCGAGT_14	High-Risk
ACGGCCACAAGCTGTT_15	Background
ACGGCCACATGCCTTC_15	Background
ACGGCCACATTCGACA_19	Background
ACGGCCAGTTCCCGAG_14	Background
ACGGCCATCTCGATGA_18	Background
ACGGCCATCTGGTATG_19	Background
ACGGGCTAGCTGTTCA_20	Background
ACGGGCTAGTGGCACA_20	High-Risk
ACGGGCTAGTGGGATC_14	High-Risk
ACGGGCTAGTGTCCCG_18	Background
ACGGGCTCAATGGAGC_15	Background
ACGGGCTGTAGCGCTC_20	Background
ACGGGCTGTAGCTTGT_20	Background
ACGGGCTTCAAACCAC_18	Background
ACGGGCTTCACGACTA_19	High-Risk
ACGGGCTTCGTAGATC_13	Background
ACGGGCTTCTCTTGAT_20	Background
ACGGGTCAGTGCCATT_18	Background
ACGGGTCCATATGAGA_20	Background
ACGGGTCGTTTCGCTC_20	High-Risk
ACGGGTCTCAACACAC_19	Background
ACGTCAAAGAAGGTTT_20	Background
ACGTCAAAGATGTAAC_18	Background
ACGTCAAAGGTACTCT_19	Background
ACGTCAAAGGTTACCT_20	Background
ACGTCAAAGTTACCCA_13	Background
ACGTCAAAGTTACCCA_14	Background
ACGTCAAGTAAATGTG_15	High-Risk
ACGTCAAGTATAGGGC_14	Background
ACGTCAAGTTCTCATT_19	High-Risk
ACGTCAATCAAGATCC_20	Background
ACTATCTAGATAGGAG_19	Background
ACTATCTAGGGAAACA_20	Background
ACTATCTAGGTAAACT_15	Background
ACTATCTCACAGCCCA_20	High-Risk
ACTATCTCACGTCAGC_19	Background
ACTATCTCAGTCGATT_20	Background
ACTATCTGTATGAATG_19	Background
ACTATCTGTCGCATCG_14	Background
ACTATCTGTCGCTTCT_20	Background
ACTGAACAGGTACTCT_14	Background
ACTGAACCAAGCGAGT_20	Background
ACTGAACCACCGAAAG_19	Background
ACTGAACCACGACGAA_15	Background
ACTGAACCAGCCTATA_20	Background
ACTGAACGTAAGGATT_15	High-Risk
ACTGAACGTACCATCA_19	Background
ACTGAACGTCCAGTAT_20	High-Risk
ACTGAACGTGAGGCTA_13	High-Risk
ACTGAACTCCACTCCA_20	Background
ACTGAGTCACAAGACG_20	Background
ACTGAGTCACCGAATT_13	High-Risk
ACTGAGTGTCATATGC_20	Background
ACTGAGTTCATGTAGC_20	Background
ACTGAGTTCTCCGGTT_15	Background
ACTGAGTTCTTTAGTC_19	Background
ACTGATGAGCAGGTCA_20	High-Risk
ACTGATGAGTAGTGCG_14	Background
ACTGATGAGTTGCAGG_15	Background
ACTGATGCAACTGGCC_13	Background
ACTGATGCAAGCGTAG_20	High-Risk
ACTGATGCAGTCAGCC_20	Background
ACTGATGCAGTTCCCT_20	High-Risk
ACTGATGGTCACTGGC_19	High-Risk
ACTGATGGTGATGATA_20	Background
ACTGATGGTTGATTGC_19	Background
ACTGCTCAGACTCGGA_20	High-Risk
ACTGCTCAGAGGTTGC_19	Background
ACTGCTCAGGTTCCTA_13	Background
ACTGCTCCAGCCAGAA_15	High-Risk
ACTGCTCCATTGGGCC_20	Background
ACTGCTCGTTTCGCTC_18	Background
ACTGTCCAGACCTAGG_19	Background
ACTGTCCAGCACCGTC_20	Background
ACTGTCCGTTGCGCAC_19	High-Risk
ACTGTCCTCAAACGGG_15	Background
ACTGTCCTCGCCAAAT_20	High-Risk
ACTGTCCTCGCCTGTT_20	Background
ACTTACTAGCAGATCG_15	High-Risk
ACTTACTCACTAAGTC_13	High-Risk
ACTTACTCATATACCG_20	High-Risk
ACTTACTCATGCCCGA_20	Background
ACTTACTGTCGCATAT_20	Background
ACTTACTGTTGACGTT_20	High-Risk
ACTTACTTCTGAGTGT_19	Background
ACTTGTTAGCCAGTAG_20	High-Risk
ACTTGTTAGTCTTGCA_19	High-Risk
ACTTGTTCACGGCCAT_19	Background
ACTTGTTCACGTAAGG_20	Background
ACTTGTTCACTAAGTC_14	Background
ACTTGTTGTCGTTGTA_14	High-Risk
ACTTGTTGTTGTACAC_20	High-Risk
ACTTGTTTCAAAGACA_19	Background
ACTTGTTTCAAGGTAA_20	High-Risk
ACTTGTTTCCAAACAC_20	Background
ACTTGTTTCTTATCTG_20	Background
ACTTGTTTCTTGACGA_15	Background
ACTTTCACAAGCCATT_18	Background
ACTTTCACACCGATAT_20	Background
ACTTTCAGTAGCTGCC_15	Background
AGAATAGAGTAGCCGA_15	High-Risk
AGAATAGAGTGAAGTT_20	High-Risk
AGAATAGCAACGATGG_16	Background
AGAATAGCAAGCCTAT_14	Background
AGAATAGGTCTAGTGT_19	Background
AGACGTTAGCCCTAAT_20	High-Risk
AGACGTTAGCTGGAAC_20	Background
AGACGTTAGGTTACCT_20	Background
AGACGTTTCAGCCTAA_15	High-Risk
AGAGCGAAGCGTTTAC_19	High-Risk
AGAGCGAAGGTGGGTT_14	High-Risk
AGAGCGAGTAAGAGGA_20	Background
AGAGCGAGTCTACCTC_20	Background
AGAGCGAGTTGGACCC_18	High-Risk
AGAGCGAGTTGGGACA_20	Background
AGAGCGATCATTTGGG_19	High-Risk
AGAGCGATCTCAACTT_20	Background
AGAGCTTAGATCTGCT_19	High-Risk
AGAGCTTAGATGTTAG_14	Background
AGAGCTTAGTGCAAGC_20	Background
AGAGCTTAGTGGACGT_20	High-Risk
AGAGCTTCAAGCCGTC_20	Background
AGAGCTTCACGAAGCA_18	High-Risk
AGAGCTTGTGCGGTAA_20	Background
AGAGCTTGTGGGTCAA_19	Background
AGAGCTTTCATGCATG_15	Background
AGAGCTTTCCTTAATC_20	Background
AGAGTGGAGGTAAACT_20	High-Risk
AGAGTGGAGTCGTTTG_19	Background
AGAGTGGCAACGATCT_18	Background
AGAGTGGCACAAGCCC_20	High-Risk
AGAGTGGCATACGCTA_15	Background
AGAGTGGCATACGCTA_16	Background
AGAGTGGGTACGAAAT_18	Background
AGAGTGGGTGTGTGCC_20	High-Risk
AGAGTGGGTTCCATGA_18	High-Risk
AGAGTGGGTTGACGTT_14	Background
AGAGTGGTCAATAAGG_20	Background
AGAGTGGTCAGTGTTG_15	Background
AGAGTGGTCCAATGGT_19	Background
AGAGTGGTCTAACTCT_14	Background
AGATCTGAGACTAGAT_19	High-Risk
AGATCTGAGATCTGAA_20	High-Risk
AGATCTGCAAAGGCGT_20	Background
AGATCTGCAGGACGTA_15	Background
AGATCTGCATGGTAGG_18	High-Risk
AGATCTGGTCAGAAGC_18	Background
AGATCTGGTTGTACAC_20	Background
AGATCTGTCAAAGACA_15	Background
AGATCTGTCGCTTGTC_20	High-Risk
AGATTGCAGGCAAAGA_20	High-Risk
AGATTGCCAGACGCCT_15	Background
AGATTGCCATGGTTGT_20	Background
AGATTGCGTACAAGTA_20	Background
AGATTGCGTCGCGTGT_13	Background
AGATTGCGTCGCGTGT_14	High-Risk
AGCAGCCAGGCCATAG_19	Background
AGCAGCCAGTTAGGTA_18	High-Risk
AGCAGCCCAAGAAGAG_13	Background
AGCAGCCCAAGACACG_20	Background
AGCAGCCCACTCTGTC_20	Background
AGCAGCCGTAGGAGTC_13	High-Risk
AGCAGCCGTGAGTATA_20	High-Risk
AGCAGCCTCAGCATGT_18	Background
AGCATACAGTCGATAA_13	Background
AGCATACCAATCCAAC_15	Background
AGCATACCACGTGAGA_14	Background
AGCATACCATTCTCAT_19	High-Risk
AGCATACGTGCAGGTA_19	Background
AGCATACTCGTCGTTC_15	Background
AGCATACTCTCAAGTG_20	High-Risk
AGCATACTCTCCCTGA_16	Background
AGCCTAAAGACCTTTG_15	Background
AGCCTAAAGCCTTGAT_20	Background
AGCCTAACAATCGAAA_15	Background
AGCCTAACACAAGCCC_15	Background
AGCCTAACACAGGCCT_19	Background
AGCCTAACACGCCAGT_18	Background
AGCCTAACATGACATC_20	Background
AGCCTAACATTACGAC_19	Background
AGCCTAAGTATCACCA_15	Background
AGCCTAAGTTACGCGC_20	Background
AGCGGTCAGACCACGA_19	High-Risk
AGCGGTCAGATGAGAG_20	Background
AGCGGTCAGCATCATC_15	High-Risk
AGCGGTCCAATAAGCA_13	Background
AGCGGTCCAATAAGCA_14	Background
AGCGGTCCACCAGTTA_15	Background
AGCGGTCCACCCATTC_20	Background
AGCGGTCCAGCCTGTG_18	High-Risk
AGCGGTCTCAGCTGGC_19	High-Risk
AGCGGTCTCCAGATCA_15	Background
AGCGGTCTCGACGGAA_13	Background
AGCGGTCTCGTGGTCG_19	Background
AGCGGTCTCTTCGGTC_19	High-Risk
AGCGGTCTCTTGAGAC_19	High-Risk
AGCGGTCTCTTGGGTA_20	High-Risk
AGCGTATAGCCCAGCT_15	Background
AGCGTATCAGGATCGA_19	Background
AGCGTATGTTATTCTC_18	High-Risk
AGCGTATTCAACACTG_15	Background
AGCGTATTCCCTGACT_13	High-Risk
AGCGTATTCGAGAACG_13	Background
AGCGTCGAGACCACGA_19	Background
AGCGTCGAGATGGCGT_14	Background
AGCGTCGCACAAGCCC_19	Background
AGCGTCGCACAAGTAA_14	Background
AGCGTCGCACAGAGGT_13	Background
AGCGTCGCACGCTTTC_14	Background
AGCGTCGCAGTAAGCG_13	Background
AGCGTCGTCAACGAAA_16	Background
AGCGTCGTCGGCCGAT_20	High-Risk
AGCTCCTAGACAGACC_13	Background
AGCTCCTAGACAGACC_14	High-Risk
AGCTCCTAGACTAAGT_20	Background
AGCTCCTGTAAGAGGA_13	High-Risk
AGCTCCTGTAAGAGGA_14	High-Risk
AGCTCCTGTAGCGTAG_20	High-Risk
AGCTCCTTCCACTGGG_20	Background
AGCTCCTTCTGTCTAT_13	High-Risk
AGCTCTCAGCGATAGC_18	High-Risk
AGCTCTCAGGGTTTCT_20	Background
AGCTCTCAGGTCATCT_20	High-Risk
AGCTCTCAGGTGATTA_15	Background
AGCTCTCAGTCGATAA_15	Background
AGCTCTCCAGATGAGC_20	Background
AGCTCTCGTAGGAGTC_13	Background
AGCTCTCTCCGTTGTC_20	Background
AGCTCTCTCGCATGGC_18	Background
AGCTCTCTCGCGATCG_14	Background
AGCTCTCTCGGAGGTA_20	Background
AGCTTGAAGACAGGCT_20	Background
AGCTTGAAGATCTGAA_18	Background
AGCTTGAAGGACAGCT_13	Background
AGCTTGAAGGACAGCT_14	High-Risk
AGCTTGAAGGATCGCA_19	High-Risk
AGCTTGAAGTAGTGCG_19	Background
AGCTTGACAAACCTAC_20	Background
AGCTTGACACAGACTT_15	Background
AGCTTGACACCATCCT_13	Background
AGCTTGACAGATTGCT_20	Background
AGCTTGACATAGAAAC_18	Background
AGCTTGAGTAAGGATT_19	Background
AGCTTGATCATTCACT_14	Background
AGCTTGATCATTCACT_15	Background
AGGCCACAGCTAACTC_20	Background
AGGCCACAGTCCATAC_15	Background
AGGCCACAGTGGTCCC_16	Background
AGGCCACCACGGTAAG_20	Background
AGGCCACGTAAACACA_13	Background
AGGCCACGTACGCACC_20	Background
AGGCCACGTGACGCCT_14	Background
AGGCCACGTGCGCTTG_19	Background
AGGCCACGTTCAGTAC_13	Background
AGGCCACTCACATAGC_13	Background
AGGCCACTCACCAGGC_13	Background
AGGCCACTCCAGTAGT_18	Background
AGGCCGTAGCGATGAC_13	Background
AGGCCGTAGCGATGAC_14	Background
AGGCCGTAGCTTATCG_19	Background
AGGCCGTAGTGCGTGA_15	Background
AGGCCGTAGTGGAGAA_20	High-Risk
AGGCCGTCACGGATAG_19	Background
AGGCCGTCAGTGAGTG_19	Background
AGGCCGTTCAGCGACC_15	Background
AGGCCGTTCTGTTTGT_14	Background
AGGGAGTAGTGCCAGA_13	Background
AGGGAGTAGTGCCAGA_14	Background
AGGGAGTCAGCGTCCA_15	Background
AGGGAGTCAGTTAACC_16	High-Risk
AGGGAGTTCTAACTGG_20	Background
AGGGATGAGAACAATC_18	Background
AGGGATGAGCGTTTAC_18	High-Risk
AGGGATGCAGTAACGG_13	Background
AGGGATGCAGTCGTGC_15	Background
AGGGATGGTCACACGC_20	Background
AGGGATGGTCACTTCC_15	Background
AGGGATGGTTCGGCAC_13	High-Risk
AGGGATGGTTTGCATG_14	Background
AGGGATGTCAGCTTAG_14	Background
AGGGATGTCTCTGAGA_20	Background
AGGGATGTCTGCTGTC_19	High-Risk
AGGGTGACAATAGCAA_14	Background
AGGGTGATCTACCTGC_19	Background
AGGGTGATCTGCGACG_20	High-Risk
AGGTCATAGACACGAC_15	Background
AGGTCATAGCTCCCAG_19	High-Risk
AGGTCATCAGGTTTCA_19	Background
AGGTCATGTCCTCCAT_20	Background
AGGTCATGTGAAAGAG_15	High-Risk
AGGTCATGTGAGTGAC_19	High-Risk
AGGTCATGTGTTAAGA_16	Background
AGGTCATTCAGGTAAA_15	Background
AGGTCATTCCATGAAC_19	Background
AGGTCATTCGAATGGG_20	Background
AGGTCATTCTAACTCT_14	Background
AGGTCATTCTTGCCGT_19	Background
AGGTCCGCAAACAACA_19	Background
AGGTCCGGTAAGAGGA_20	High-Risk
AGGTCCGGTAATAGCA_18	Background
AGGTCCGGTAGGGACT_20	High-Risk
AGGTCCGGTATGGTTC_20	Background
AGGTCCGGTGATAAGT_13	Background
AGGTCCGGTGCGAAAC_19	Background
AGGTCCGGTTTGACAC_13	High-Risk
AGGTCCGTCAAGGCTT_19	Background
AGGTCCGTCTCTAGGA_20	Background
AGGTCCGTCTGCAAGT_20	Background
AGTAGTCAGAGCTGCA_20	High-Risk
AGTAGTCAGCAGGTCA_20	High-Risk
AGTAGTCCAGTATGCT_19	Background
AGTAGTCTCGCATGAT_14	Background
AGTCTTTAGAATTCCC_20	Background
AGTCTTTCACCGAATT_14	Background
AGTCTTTGTAGGCATG_20	Background
AGTCTTTGTCATGCCG_18	Background
AGTCTTTGTGTGACCC_20	Background
AGTCTTTGTTGCCTCT_19	Background
AGTCTTTGTTGCGTTA_14	Background
AGTCTTTTCAAGGTAA_20	Background
AGTCTTTTCACCAGGC_20	Background
AGTCTTTTCTCGATGA_19	Background
AGTGAGGAGCGTAGTG_20	Background
AGTGAGGAGCTTCGCG_19	Background
AGTGAGGAGGACCACA_19	High-Risk
AGTGAGGAGTTAGGTA_20	Background
AGTGAGGCATGTTCCC_20	Background
AGTGAGGGTCTAGGTT_20	Background
AGTGAGGGTTGTACAC_20	Background
AGTGGGAAGAGTACAT_18	High-Risk
AGTGGGAAGCTGCCCA_18	Background
AGTGGGAAGTACATGA_20	Background
AGTGGGAAGTAGGTGC_19	Background
AGTGGGAAGTCACGCC_20	High-Risk
AGTGGGAAGTGTTGAA_19	High-Risk
AGTGGGACAGGCGATA_19	Background
AGTGGGAGTATTACCG_20	High-Risk
AGTGGGAGTCGCTTCT_14	Background
AGTGGGATCGGATGGA_19	Background
AGTGGGATCTGTTTGT_13	Background
AGTGTCAAGCGTAATA_20	Background
AGTGTCAAGTAGCGGT_19	High-Risk
AGTGTCAAGTTTCCTT_19	Background
AGTGTCACAATTCCTT_19	Background
AGTGTCACAGGTGCCT_20	Background
AGTGTCACAGTTTACG_14	Background
AGTGTCAGTACATGTC_19	High-Risk
AGTGTCAGTGATGCCC_19	Background
AGTGTCAGTTCGCGAC_15	Background
AGTGTCAGTTCTGGTA_20	High-Risk
AGTGTCATCATCTGCC_19	Background
AGTTGGTAGCAGACTG_13	Background
AGTTGGTAGCAGACTG_14	High-Risk
AGTTGGTCAAACGTGG_13	High-Risk
AGTTGGTCACAAGACG_18	High-Risk
AGTTGGTCACCTATCC_13	Background
AGTTGGTGTAGATTAG_18	Background
AGTTGGTGTATAGGTA_19	Background
AGTTGGTGTCCGCTGA_14	Background
AGTTGGTGTTTCGCTC_18	Background
AGTTGGTTCAGCGACC_20	High-Risk
AGTTGGTTCATGCAAC_20	Background
AGTTGGTTCTTAGAGC_20	Background
AGTTGGTTCTTGAGAC_20	Background
ATAACGCAGCCAACAG_15	High-Risk
ATAACGCAGCTCAACT_18	High-Risk
ATAACGCAGTCTCGGC_19	Background
ATAACGCCAGTTAACC_20	High-Risk
ATAACGCGTCTCTCTG_20	High-Risk
ATAACGCGTGCAACGA_16	High-Risk
ATAACGCGTTTGTGTG_14	Background
ATAAGAGAGAGTCTGG_20	Background
ATAAGAGCAGGGTTAG_20	High-Risk
ATAAGAGGTAAACGCG_20	Background
ATAAGAGGTAGAAAGG_19	High-Risk
ATAAGAGGTTACTGAC_20	High-Risk
ATAAGAGGTTCACCTC_19	Background
ATAAGAGTCAGTCCCT_15	Background
ATAAGAGTCGTCACGG_14	Background
ATAGACCAGGGAACGG_20	High-Risk
ATAGACCCATGTCCTC_20	Background
ATAGACCGTATATGAG_19	High-Risk
ATAGACCGTGTTGGGA_15	Background
ATAGACCGTTAAGTAG_17	Background
ATAGACCGTTGGTGGA_15	Background
ATAGACCTCCCTTGTG_13	Background
ATCACGAAGACCTTTG_16	Background
ATCACGAAGTCCGTAT_15	Background
ATCACGACACACGCTG_15	Background
ATCACGACACGTCTCT_14	High-Risk
ATCACGACACTGTGTA_18	Background
ATCACGACAGCCACCA_14	Background
ATCACGAGTAAGTAGT_20	Background
ATCACGAGTAGCAAAT_19	Background
ATCACGAGTGTGACGA_20	Background
ATCACGATCACTTACT_19	High-Risk
ATCACGATCCCGGATG_15	Background
ATCACGATCTTATCTG_20	Background
ATCATCTAGAACAACT_20	High-Risk
ATCATCTAGAGAGCTC_16	Background
ATCATCTAGCGCCTTG_19	Background
ATCATCTAGTACACCT_19	Background
ATCATCTCACGGTAAG_15	Background
ATCATCTCAGCATACT_15	Background
ATCATCTCAGCCTTTC_19	Background
ATCATCTGTAAACGCG_19	High-Risk
ATCATCTGTCATTAGC_14	Background
ATCATCTGTCTACCTC_19	Background
ATCATCTTCCTTTCGG_19	Background
ATCATCTTCTCAACTT_19	Background
ATCATGGAGATAGCAT_19	High-Risk
ATCATGGAGTGAACAT_20	Background
ATCATGGAGTGCTGCC_19	Background
ATCATGGCACTTGGAT_20	Background
ATCCACCAGCGTTTAC_13	Background
ATCCACCAGCTAACTC_13	Background
ATCCACCAGTTGAGTA_19	High-Risk
ATCCACCCAGAAGCAC_13	High-Risk
ATCCACCCAGAAGCAC_14	High-Risk
ATCCACCCATACTCTT_20	High-Risk
ATCCACCGTCCATCCT_15	Background
ATCCACCGTCTTGCGG_18	Background
ATCCACCTCGGCATCG_20	Background
ATCCACCTCGGCGGTT_14	Background
ATCCACCTCTCTAAGG_19	Background
ATCCGAAAGGGATGGG_15	Background
ATCCGAACACGCGAAA_18	Background
ATCCGAACACGTCAGC_20	Background
ATCCGAACACTGAAGG_15	Background
ATCCGAACAGATGAGC_20	Background
ATCCGAAGTCCTAGCG_14	Background
ATCCGAAGTCTAGGTT_20	Background
ATCGAGTAGCCAGGAT_18	Background
ATCGAGTAGCCGATTT_20	Background
ATCGAGTAGCTAAACA_15	Background
ATCGAGTAGGCAAAGA_14	Background
ATCGAGTAGGCGACAT_19	Background
ATCGAGTAGTGATCGG_15	High-Risk
ATCGAGTCACTGTTAG_14	Background
ATCGAGTTCTTTACAC_20	Background
ATCTACTAGTCTCGGC_18	Background
ATCTACTAGTGTTTGC_14	High-Risk
ATCTACTCAATACGCT_20	Background
ATCTACTGTATTCTCT_19	High-Risk
ATCTACTGTCACAAGG_20	Background
ATCTACTGTCTTCAAG_20	Background
ATCTACTTCATCATTC_16	High-Risk
ATCTACTTCGCCGTGA_20	Background
ATCTGCCAGAGCCTAG_14	Background
ATCTGCCAGAGCTGGT_20	High-Risk
ATCTGCCAGAGTAAGG_19	Background
ATCTGCCAGATATGCA_19	Background
ATCTGCCCAAGCGATG_18	Background
ATCTGCCCACCTCGTT_20	High-Risk
ATCTGCCCACTTAACG_14	Background
ATCTGCCGTCAGAATA_18	High-Risk
ATCTGCCTCAACCATG_19	Background
ATCTGCCTCCTCTAGC_15	Background
ATGAGGGAGAATGTGT_19	Background
ATGAGGGAGCTGCCCA_18	Background
ATGAGGGAGTGAATTG_20	Background
ATGAGGGGTTCAACCA_20	High-Risk
ATGAGGGGTTGCGTTA_18	Background
ATGAGGGTCGCTAGCG_20	High-Risk
ATGCGATAGACTTGAA_20	Background
ATGCGATAGATGAGAG_20	Background
ATGCGATAGTGTACGG_20	Background
ATGCGATCAAGTTAAG_19	High-Risk
ATGCGATCACGCATCG_19	High-Risk
ATGCGATCAGTCAGAG_13	High-Risk
ATGCGATCAGTCAGAG_14	High-Risk
ATGCGATTCGCCGTGA_20	Background
ATGCGATTCTATGTGG_19	High-Risk
ATGGGAGAGACTAGGC_20	Background
ATGGGAGAGATGTCGG_20	Background
ATGGGAGAGCGAAGGG_20	Background
ATGGGAGAGGAGTAGA_20	High-Risk
ATGGGAGCATACCATG_14	Background
ATGGGAGGTACTCAAC_13	Background
ATGGGAGGTACTCAAC_14	Background
ATGGGAGGTCGAGATG_18	Background
ATGGGAGGTGGCGAAT_14	High-Risk
ATGGGAGGTGGCGAAT_15	Background
ATGGGAGGTTCCATGA_20	High-Risk
ATGGGAGTCCAAACAC_14	Background
ATGTGTGAGTGGTCCC_19	High-Risk
ATGTGTGGTGACCAAG_20	Background
ATGTGTGGTTAGTGGG_20	Background
ATGTGTGTCTTTACGT_14	High-Risk
ATTACTCAGAGACGAA_13	Background
ATTACTCAGAGACGAA_14	Background
ATTACTCAGCAGGCTA_15	Background
ATTACTCAGGCATGTG_13	High-Risk
ATTACTCCAATGCCAT_13	Background
ATTACTCCACAGGCCT_13	Background
ATTACTCCACATAACC_20	Background
ATTACTCCACTGAAGG_20	Background
ATTACTCGTGTGGTTT_20	Background
ATTACTCGTTATCGGT_19	High-Risk
ATTATCCAGGCAAAGA_14	Background
ATTATCCAGGCAAAGA_15	Background
ATTATCCAGGCCCTTG_20	High-Risk
ATTATCCCAAGTCTGT_20	Background
ATTATCCCAATCTACG_15	Background
ATTATCCCACACCGCA_20	High-Risk
ATTATCCCAGATTGCT_15	Background
ATTATCCCATTGGTAC_15	Background
ATTATCCGTAAGGATT_14	Background
ATTATCCGTAGCCTCG_19	High-Risk
ATTATCCGTCAGCTAT_19	High-Risk
ATTATCCGTTCAGCGC_15	Background
ATTATCCGTTCAGTAC_20	High-Risk
ATTCTACAGCTTATCG_13	Background
ATTCTACAGCTTATCG_14	Background
ATTCTACAGTCAAGCG_19	Background
ATTCTACAGTCGAGTG_13	Background
ATTCTACAGTCGAGTG_14	Background
ATTCTACAGTTGTAGA_13	Background
ATTCTACCAATGTTGC_14	Background
ATTCTACCACAGGAGT_13	High-Risk
ATTCTACCATCCCATC_13	Background
ATTCTACGTCAGAGGT_19	Background
ATTCTACGTCGCATAT_19	Background
ATTCTACGTTATTCTC_19	Background
ATTCTACTCAGAGCTT_20	Background
ATTCTACTCCCTCAGT_15	High-Risk
ATTCTACTCGATAGAA_20	Background
ATTCTACTCTACTTAC_20	High-Risk
ATTCTACTCTCGAGTA_20	Background
ATTGGACAGTACATGA_19	High-Risk
ATTGGACAGTACGTAA_20	High-Risk
ATTGGACAGTTTCCTT_20	Background
ATTGGACCAAACCCAT_20	Background
ATTGGACGTGCGATAG_20	Background
ATTGGACGTGGGTCAA_15	Background
ATTGGACGTGGTGTAG_20	High-Risk
ATTGGACTCGTCCAGG_19	Background
ATTGGTGCAATAGCAA_19	Background
ATTGGTGCACACTGCG_19	High-Risk
ATTGGTGCAGCCAATT_13	Background
ATTTCTGAGACACTAA_20	Background
ATTTCTGAGTTCGCAT_20	Background
ATTTCTGCAATGTTGC_15	High-Risk
ATTTCTGCACTAAGTC_15	High-Risk
ATTTCTGCAGCCTGTG_13	Background
ATTTCTGCAGCCTGTG_14	High-Risk
ATTTCTGCATCAGTCA_19	High-Risk
ATTTCTGCATGCATGT_20	High-Risk
ATTTCTGGTAAATACG_20	Background
ATTTCTGGTAAGCACG_20	High-Risk
ATTTCTGGTATCACCA_19	Background
ATTTCTGGTATCTGCA_20	Background
ATTTCTGTCAGTTCGA_19	Background
CAACCAAAGAAACCGC_20	Background
CAACCAAAGAGGTACC_14	High-Risk
CAACCAAAGATGTGTA_19	High-Risk
CAACCAAAGCACGCCT_20	Background
CAACCAAAGCCACGCT_19	High-Risk
CAACCAAAGGCGCTCT_19	Background
CAACCAAAGTTTCCTT_13	High-Risk
CAACCAACAAACAACA_19	Background
CAACCAACATGATCCA_19	Background
CAACCAAGTAAGTGTA_19	Background
CAACCAAGTACCGTAT_14	High-Risk
CAACCAAGTGCCTTGG_14	Background
CAACCAAGTGCCTTGG_20	Background
CAACCAAGTTGCCTCT_18	Background
CAACCTCAGAAGGACA_15	High-Risk
CAACCTCAGATGAGAG_20	Background
CAACCTCCAAGCGATG_20	Background
CAACCTCCAATGAAAC_20	High-Risk
CAACCTCCAGATAATG_14	Background
CAACCTCGTTCAGCGC_13	Background
CAACCTCTCAGCTGGC_20	Background
CAACCTCTCGTGGTCG_20	Background
CAACTAGAGCGCTCCA_18	High-Risk
CAACTAGAGGAATCGC_19	High-Risk
CAACTAGAGGCAGGTT_19	Background
CAACTAGAGTGAACAT_19	Background
CAACTAGCAAGGTTCT_15	Background
CAACTAGCAAGGTTCT_16	Background
CAACTAGCACTTGGAT_19	Background
CAACTAGCATACTCTT_15	Background
CAACTAGGTCAGCTAT_16	Background
CAACTAGGTTTGGGCC_20	Background
CAACTAGTCAAAGTAG_18	High-Risk
CAACTAGTCGCTGATA_20	Background
CAAGAAAAGCATGGCA_14	High-Risk
CAAGAAAAGCATGGCA_15	High-Risk
CAAGAAAAGCATGGCA_16	Background
CAAGAAAAGGCAATTA_14	Background
CAAGAAAAGTTGAGAT_13	Background
CAAGAAACACTGAAGG_19	High-Risk
CAAGAAACAGGGTACA_13	Background
CAAGAAAGTGAGGCTA_15	Background
CAAGAAATCAGTTGAC_19	Background
CAAGAAATCCTAGAAC_13	Background
CAAGAAATCCTAGAAC_16	Background
CAAGATCAGGTGATTA_19	Background
CAAGATCCACATGGGA_15	Background
CAAGATCCAGTCCTTC_13	High-Risk
CAAGATCCAGTCCTTC_14	High-Risk
CAAGATCGTTATTCTC_13	Background
CAAGATCTCTTATCTG_15	Background
CAAGGCCAGTCCAGGA_19	Background
CAAGGCCCAAGTCTAC_19	Background
CAAGGCCCATTCTTAC_19	Background
CAAGGCCGTCCCTACT_15	Background
CAAGGCCGTCCCTACT_20	High-Risk
CAAGGCCTCAATACCG_18	High-Risk
CAAGGCCTCACGCGGT_15	Background
CAAGTTGCAATACGCT_19	Background
CAAGTTGCACATGTGT_20	High-Risk
CAAGTTGCATCGATTG_14	Background
CAAGTTGGTCTTGATG_20	Background
CAAGTTGGTTCCAACA_15	Background
CAAGTTGGTTTAGCTG_20	Background
CAAGTTGTCACTATTC_20	Background
CAAGTTGTCCCTAATT_19	High-Risk
CAAGTTGTCGGCATCG_15	Background
CACAAACAGAGCTGGT_14	Background
CACAAACCAGGTGGAT_20	High-Risk
CACAAACGTATTCTCT_20	Background
CACAAACGTCTAACGT_13	Background
CACAAACGTGGTGTAG_19	Background
CACAAACGTGTGAATA_15	High-Risk
CACAAACTCAGGCGAA_20	High-Risk
CACAAACTCTGTACGA_20	Background
CACAAACTCTGTTGAG_20	Background
CACACAAAGCCTATGT_19	Background
CACACAACACGAGAGT_13	Background
CACACAATCCAAACTG_20	Background
CACACAATCCACTGGG_15	Background
CACACAATCCGGCACA_19	Background
CACACAATCGTGGACC_15	High-Risk
CACACAATCTCAAGTG_18	Background
CACACCTAGGCCCTTG_14	Background
CACACCTAGTCTCGGC_20	Background
CACACCTAGTGTACGG_14	Background
CACACCTCACGAAGCA_14	Background
CACACCTCAGCCTGTG_19	Background
CACACCTCAGCTGTTA_20	Background
CACACCTGTGGGTCAA_20	Background
CACACCTTCACAACGT_19	Background
CACACCTTCACCCTCA_20	Background
CACACCTTCATAGCAC_20	High-Risk
CACACCTTCCGAGCCA_14	Background
CACACCTTCTCACATT_15	Background
CACACTCAGGTTCCTA_20	Background
CACACTCAGTAGGTGC_20	Background
CACACTCCATCGGACC_20	Background
CACACTCGTAAGCACG_14	Background
CACACTCGTAAGCACG_15	Background
CACACTCGTCGAACAG_18	High-Risk
CACACTCTCCAAAGTC_13	Background
CACACTCTCCAAAGTC_14	High-Risk
CACACTCTCCAAGTAC_19	Background
CACAGGCAGAAGGCCT_20	Background
CACAGGCAGACATAAC_19	Background
CACAGGCAGGTGCAAC_15	Background
CACAGGCAGTTTAGGA_20	Background
CACAGGCCAACGATGG_20	High-Risk
CACAGGCCAATTCCTT_20	Background
CACAGGCCACGCGAAA_20	High-Risk
CACAGGCCACGGCTAC_19	High-Risk
CACAGGCGTCTGCAAT_19	Background
CACAGGCGTTCAGGCC_18	High-Risk
CACAGGCTCATTCACT_20	Background
CACAGGCTCCATTCTA_15	Background
CACAGTAAGTACGCCC_13	Background
CACAGTACAATGGACG_20	Background
CACAGTACAGTCGTGC_14	Background
CACAGTACATAACCTG_19	Background
CACAGTAGTAAATACG_19	Background
CACAGTATCGGAAATA_20	Background
CACATAGGTACCGTAT_15	Background
CACATAGGTGCAACTT_19	Background
CACATAGGTTTCCACC_20	Background
CACATAGTCAGAAATG_15	Background
CACATAGTCCTTTCTC_20	Background
CACATAGTCGGTGTTA_20	Background
CACATAGTCTGCGACG_20	Background
CACATTTAGACTCGGA_18	Background
CACATTTAGCCAACAG_20	Background
CACATTTAGTGGTAGC_15	Background
CACATTTCAGATTGCT_18	High-Risk
CACATTTGTACGAAAT_19	Background
CACATTTGTAGCACGA_15	High-Risk
CACATTTGTCATATGC_20	Background
CACATTTTCAAGAAGT_13	Background
CACATTTTCAAGAAGT_14	High-Risk
CACATTTTCAGTTTGG_19	Background
CACATTTTCCGTACAA_14	Background
CACATTTTCCTTGCCA_14	Background
CACATTTTCCTTGCCA_15	High-Risk
CACCACTAGTCCAGGA_20	Background
CACCACTCATCGGAAG_15	Background
CACCACTCATGAGCGA_19	High-Risk
CACCACTGTCCGAAGA_15	Background
CACCACTGTCCGACGT_16	Background
CACCACTGTCGCCATG_19	Background
CACCACTGTCTGCGGT_20	Background
CACCACTTCCTGTACC_20	Background
CACCAGGAGACAAGCC_18	Background
CACCAGGAGATATGGT_20	Background
CACCAGGAGCTCCCAG_20	Background
CACCAGGAGGAATGGA_19	Background
CACCAGGCAGTCTTCC_20	Background
CACCAGGCATTCCTCG_19	Background
CACCAGGGTACGCACC_20	High-Risk
CACCAGGGTCGACTGC_19	Background
CACCAGGGTTACTGAC_20	High-Risk
CACCAGGGTTCTGGTA_19	Background
CACCAGGGTTTCCACC_15	Background
CACCAGGTCATTGCCC_14	High-Risk
CACCAGGTCCCATTTA_15	Background
CACCAGGTCCTGCCAT_15	Background
CACCAGGTCGCCTGTT_19	High-Risk
CACCTTGAGGCGTACA_19	High-Risk
CACCTTGTCCGCATCT_19	Background
CACCTTGTCCTGCTTG_20	High-Risk
CACCTTGTCGTCGTTC_20	Background
CACTCCACAGGGATTG_20	High-Risk
CACTCCAGTGTGCCTG_14	Background
CACTCCATCTGGCGAC_20	Background
CAGAATCCAGGTCGTC_14	High-Risk
CAGAATCGTAAGAGAG_19	High-Risk
CAGAATCGTTTGCATG_20	High-Risk
CAGAATCGTTTGTGTG_20	High-Risk
CAGAATCTCGATCCCT_18	Background
CAGAGAGAGCCACTAT_18	Background
CAGAGAGAGTGAATTG_16	Background
CAGAGAGCAGAAGCAC_19	High-Risk
CAGAGAGCAGCGTTCG_20	Background
CAGAGAGCAGTCTTCC_13	High-Risk
CAGAGAGCATCACGTA_13	Background
CAGAGAGGTCCATGAT_20	Background
CAGAGAGGTCGCCATG_19	Background
CAGAGAGTCCACGTGG_18	Background
CAGATCAAGAGTCGGT_13	Background
CAGATCAAGAGTCGGT_14	Background
CAGATCAAGATCTGCT_14	Background
CAGATCAAGATGGGTC_14	Background
CAGATCACAAACTGTC_20	Background
CAGATCACAGAGTGTG_19	Background
CAGATCACATGCATGT_16	Background
CAGATCAGTCGGCACT_19	High-Risk
CAGATCAGTTCACGGC_20	Background
CAGATCAGTTTACTCT_20	Background
CAGATCATCAGGCAAG_15	Background
CAGATCATCATAGCAC_19	Background
CAGATCATCGGCATCG_13	Background
CAGATCATCTGTACGA_19	Background
CAGCAGCAGAGCCCAA_19	High-Risk
CAGCAGCAGAGTACCG_14	Background
CAGCAGCAGCTGCGAA_19	Background
CAGCAGCCACAGAGGT_13	Background
CAGCAGCCATGCCCGA_20	High-Risk
CAGCAGCGTACTCTCC_20	High-Risk
CAGCAGCTCAACACTG_20	High-Risk
CAGCATAGTGAGGGAG_18	Background
CAGCCGAAGTACGTTC_15	Background
CAGCCGAAGTTTAGGA_20	Background
CAGCCGACAGACTCGC_20	Background
CAGCCGACATGTTGAC_15	Background
CAGCCGAGTCCAGTGC_19	Background
CAGCCGATCCCATTTA_19	Background
CAGCCGATCGTAGGAG_18	Background
CAGCGACCACCAGATT_20	Background
CAGCGACCAGTGGGAT_20	Background
CAGCGACCATAAAGGT_20	Background
CAGCGACGTAAGGATT_14	High-Risk
CAGCGACTCCACGTTC_20	High-Risk
CAGCGACTCCAGAGGA_15	Background
CAGCGACTCCCATTAT_19	Background
CAGCGACTCCGTCATC_19	High-Risk
CAGCGACTCGCCCTTA_19	Background
CAGCGACTCGGTGTCG_13	Background
CAGCGACTCTCGCATC_20	High-Risk
CAGCTAAAGCGTGAAC_19	Background
CAGCTAAAGCTAGTGG_15	Background
CAGCTAAAGGGATGGG_19	Background
CAGCTAAAGTTCGATC_13	Background
CAGCTAACAGGTCCAC_19	Background
CAGCTAACATCCGTGG_19	Background
CAGCTAACATCCTTGC_20	Background
CAGCTAAGTCGGATCC_19	High-Risk
CAGCTGGAGATCTGCT_13	High-Risk
CAGCTGGAGATCTGCT_14	High-Risk
CAGCTGGAGATGTAAC_19	High-Risk
CAGCTGGAGTAGCCGA_20	Background
CAGCTGGCAGTAGAGC_19	High-Risk
CAGCTGGGTCGGGTCT_15	Background
CAGCTGGGTGCGGTAA_19	Background
CAGCTGGTCAATCTCT_18	Background
CAGCTGGTCCGTTGTC_13	High-Risk
CAGCTGGTCGCATGGC_19	High-Risk
CAGCTGGTCGTCCAGG_20	Background
CAGGTGCAGGACATTA_15	Background
CAGGTGCAGTACGACG_18	High-Risk
CAGGTGCCACAGATTC_19	Background
CAGGTGCGTAGGACAC_20	Background
CAGGTGCGTCAACATC_19	High-Risk
CAGGTGCGTGCGATAG_20	Background
CAGTAACCAAGCGAGT_13	High-Risk
CAGTAACCACAGGTTT_19	Background
CAGTAACCAGGGCATA_20	High-Risk
CAGTAACGTAAGGGCT_20	Background
CAGTAACGTATAGTAG_20	Background
CAGTAACGTCAGTGGA_20	High-Risk
CAGTAACGTCTAGGTT_19	Background
CAGTAACTCGCCCTTA_14	Background
CAGTCCTAGGCTACGA_20	Background
CAGTCCTAGGGTATCG_20	High-Risk
CAGTCCTGTTCGGCAC_20	Background
CAGTCCTTCACGCATA_20	Background
CAGTCCTTCGTAGGAG_18	Background
CATATGGAGAAGCCCA_14	Background
CATATGGAGAAGCCCA_15	Background
CATATGGAGCTAGTGG_14	Background
CATATGGCAAGCCGCT_19	High-Risk
CATATGGCAAGCGCTC_19	Background
CATATGGCAAGCTGAG_20	High-Risk
CATATGGCACTTCTGC_20	Background
CATATGGCATGCTGGC_19	Background
CATATGGTCACATGCA_19	Background
CATATGGTCACCTTAT_20	Background
CATATTCAGCAGCCTC_20	High-Risk
CATATTCAGTATGACA_15	Background
CATATTCAGTATGACA_16	Background
CATATTCGTAAACGCG_20	Background
CATATTCGTAGCTGCC_14	Background
CATATTCGTCTAGTGT_14	Background
CATATTCGTGCCTTGG_19	Background
CATCAAGCAGATCCAT_15	Background
CATCAAGCATCGTCGG_19	Background
CATCAAGCATTGGGCC_19	Background
CATCAAGGTAGAAAGG_15	Background
CATCAAGGTCGAATCT_19	Background
CATCAAGGTCGAGATG_19	High-Risk
CATCAAGTCCGCATAA_20	High-Risk
CATCAGAAGAACAATC_20	Background
CATCAGACACAGGAGT_18	Background
CATCAGACACCGCTAG_15	Background
CATCAGACATCGGGTC_18	High-Risk
CATCAGATCCACGTGG_20	Background
CATCCACAGAAGGGTA_20	High-Risk
CATCCACCAAACTGTC_18	High-Risk
CATCCACCAAAGAATC_20	High-Risk
CATCCACCAAGTAGTA_20	Background
CATCCACCACATCTTT_19	Background
CATCCACCACGCCAGT_19	Background
CATCCACCAGAGTGTG_15	High-Risk
CATCCACCATAAGACA_20	High-Risk
CATCCACTCCTGCCAT_15	Background
CATCGAACAAGTCATC_16	Background
CATCGAACAGGTGCCT_15	Background
CATCGAAGTAAATACG_20	Background
CATCGAAGTAATAGCA_19	High-Risk
CATCGAAGTCCGTTAA_19	Background
CATCGAAGTGCCTGCA_20	Background
CATCGAATCAGTCAGT_19	Background
CATCGGGAGAGGGCTT_18	High-Risk
CATCGGGAGTGTACCT_19	Background
CATCGGGCAAGTCTGT_19	High-Risk
CATCGGGCATATGAGA_20	Background
CATCGGGGTACTCTCC_20	Background
CATCGGGGTTTGACTG_15	Background
CATCGGGTCAACCATG_20	Background
CATCGGGTCCAGATCA_20	Background
CATCGGGTCTGGGCCA_19	Background
CATCGGGTCTTGGGTA_19	Background
CATGACAAGAGCTGCA_20	Background
CATGACACAAGGCTCC_19	High-Risk
CATGACACACGCCAGT_20	High-Risk
CATGACACATGCCTTC_20	Background
CATGACAGTAGAGCTG_19	High-Risk
CATGACATCAACCAAC_14	Background
CATGACATCGCTGATA_20	Background
CATGACATCTTACCGC_16	Background
CATGCCTAGAGCTTCT_19	Background
CATGCCTCAAATACAG_19	Background
CATGCCTCACACATGT_20	Background
CATGCCTCACCCAGTG_14	Background
CATGCCTTCCGCGTTT_20	Background
CATGCCTTCGGCGCAT_16	Background
CATGCCTTCTACGAGT_20	Background
CATGGCGAGAGTGACC_13	Background
CATGGCGAGATACACA_13	Background
CATGGCGAGCTAACTC_15	Background
CATGGCGGTCTAAACC_20	High-Risk
CATGGCGGTGTGGTTT_20	Background
CATGGCGTCGACGGAA_20	High-Risk
CATTATCCACAGGTTT_19	Background
CATTATCGTATTCTCT_20	Background
CATTATCGTCTACCTC_13	Background
CATTATCGTTTGACTG_15	Background
CATTATCTCAATCTCT_20	Background
CATTATCTCCACGACG_18	Background
CATTATCTCGCCTGTT_15	Background
CATTCGCAGATATACG_18	High-Risk
CATTCGCAGATCCTGT_16	Background
CATTCGCAGGCGCTCT_14	Background
CATTCGCGTACGCTGC_20	Background
CATTCGCGTATAGGGC_14	High-Risk
CATTCGCGTCAGCTAT_13	Background
CATTCGCGTCCTCCAT_19	Background
CATTCGCTCACGATGT_20	Background
CATTCGCTCCTATTCA_18	Background
CATTCGCTCGTCGTTC_13	High-Risk
CATTCGCTCTCACATT_19	Background
CCAATCCGTCTCATCC_19	Background
CCAATCCTCAGAGGTG_20	Background
CCAATCCTCATCGCTC_20	Background
CCAATCCTCTACCAGA_15	Background
CCACCTACATGATCCA_20	Background
CCACCTAGTCCAGTAT_18	Background
CCACCTAGTCTGCGGT_19	High-Risk
CCACCTATCCCTTGTG_15	High-Risk
CCACCTATCGTATCAG_20	Background
CCACGGAAGACAGGCT_15	Background
CCACGGACACGCCAGT_14	Background
CCACGGACACGCCAGT_15	High-Risk
CCACGGAGTCTCTTTA_19	Background
CCACGGAGTGAGGCTA_14	Background
CCACGGAGTGTCCTCT_20	High-Risk
CCACGGAGTTCTGTTT_20	Background
CCACGGATCATCACCC_20	Background
CCACGGATCCATGCTC_15	Background
CCACGGATCCCTCTTT_20	Background
CCACGGATCGTATCAG_20	High-Risk
CCACGGATCGTGTAGT_13	High-Risk
CCACTACAGACTTTCG_18	High-Risk
CCACTACAGAGGTACC_19	High-Risk
CCACTACAGTGACATA_14	Background
CCACTACCAACTGCGC_20	Background
CCACTACCAGCCACCA_19	High-Risk
CCACTACCATTCTCAT_20	Background
CCACTACGTACCTACA_15	High-Risk
CCACTACGTGAAGGCT_20	Background
CCACTACGTGTTCGAT_20	High-Risk
CCACTACGTTCACCTC_20	High-Risk
CCACTACTCCTGTAGA_18	Background
CCACTACTCGTTACAG_19	Background
CCAGCGAAGCCATCGC_16	Background
CCAGCGAAGCGTTCCG_19	Background
CCAGCGAAGTATGACA_14	Background
CCAGCGACAAATCCGT_20	Background
CCAGCGACACATGTGT_18	Background
CCAGCGAGTATAGTAG_19	High-Risk
CCAGCGAGTCGCTTCT_20	High-Risk
CCAGCGAGTTATGTGC_20	High-Risk
CCAGCGAGTTTGGGCC_20	Background
CCAGCGATCCAAAGTC_20	Background
CCATGTCAGAAACCGC_19	High-Risk
CCATGTCAGGACACCA_20	Background
CCATGTCAGGTGACCA_20	Background
CCATGTCAGTCACGCC_20	Background
CCATGTCAGTCCTCCT_20	High-Risk
CCATGTCAGTGTGAAT_19	Background
CCATGTCCAATAGCAA_14	Background
CCATGTCGTCTCTCTG_15	Background
CCATGTCGTGCTGTAT_15	Background
CCATGTCGTTAGAACA_19	High-Risk
CCATGTCTCACGCGGT_15	Background
CCATGTCTCCTCTAGC_19	Background
CCATTCGAGACACTAA_15	Background
CCATTCGAGCAGCGTA_13	Background
CCATTCGAGGGAACGG_14	Background
CCATTCGAGGTGACCA_13	Background
CCATTCGAGGTGACCA_14	High-Risk
CCATTCGCAACTGCTA_15	Background
CCATTCGCAAGTAATG_20	High-Risk
CCATTCGCACGGTGTC_15	High-Risk
CCATTCGCAGGCTGAA_20	High-Risk
CCATTCGTCTACTCAT_19	Background
CCATTCGTCTCCCTGA_19	Background
CCCAATCAGGTGATAT_20	High-Risk
CCCAATCAGTGTTTGC_15	Background
CCCAATCCAGCATACT_19	Background
CCCAATCGTACTTAGC_15	Background
CCCAATCGTCATCCCT_13	Background
CCCAATCGTCGGCACT_15	Background
CCCAATCTCTTTAGGG_19	Background
CCCAGTTAGACTTGAA_14	Background
CCCAGTTAGGTAAACT_19	High-Risk
CCCAGTTAGTACGCGA_15	Background
CCCAGTTAGTGACTCT_20	Background
CCCAGTTCATCGGGTC_20	Background
CCCAGTTGTCCCTACT_14	Background
CCCAGTTGTTAAGAAC_19	Background
CCCAGTTTCCCTTGCA_15	Background
CCCATACAGTCCCACG_18	Background
CCCATACCAATCGGTT_19	High-Risk
CCCATACCACGAAGCA_19	Background
CCCATACGTCTAAAGA_19	Background
CCCATACGTCTAACGT_14	Background
CCCATACGTCTCAACA_20	Background
CCCATACGTGGTCTCG_14	Background
CCCATACTCAGCTCGG_18	Background
CCCTCCTAGCTATGCT_19	Background
CCCTCCTCAAGCGCTC_19	Background
CCCTCCTGTCTGGTCG_15	Background
CCCTCCTTCAACGCTA_15	Background
CCCTCCTTCGGCTACG_13	High-Risk
CCGGGATAGAGTAATC_19	High-Risk
CCGGGATAGATATGCA_20	Background
CCGGGATAGTCGAGTG_20	High-Risk
CCGGGATCAACTGCTA_19	Background
CCGGGATCAAGCCCAC_20	Background
CCGGGATCAGACGCCT_15	Background
CCGGGATCAGACGCTC_14	High-Risk
CCGGGATGTACAAGTA_20	High-Risk
CCGGGATGTCCAGTAT_18	Background
CCGGGATGTTACGACT_20	High-Risk
CCGGGATGTTTGCATG_20	Background
CCGGTAGAGAAACCTA_20	Background
CCGGTAGAGCACCGTC_19	Background
CCGGTAGCACCCATTC_19	Background
CCGGTAGGTACCCAAT_15	High-Risk
CCGGTAGGTCATTAGC_20	Background
CCGGTAGTCGGTCTAA_19	Background
CCGTACTAGAGTAAGG_19	High-Risk
CCGTACTAGCACACAG_20	Background
CCGTACTCAATGGAGC_19	Background
CCGTACTCACAAGTAA_13	Background
CCGTACTCACAAGTAA_14	Background
CCGTACTCACCATGTA_20	Background
CCGTACTCAGTCGATT_14	Background
CCGTACTCATCATCCC_15	Background
CCGTACTGTCGCCATG_20	Background
CCGTACTGTGATAAGT_20	High-Risk
CCGTACTGTTTAGGAA_13	Background
CCGTGGAAGAAGATTC_20	Background
CCGTGGAAGCCACGTC_13	High-Risk
CCGTGGACAATAAGCA_19	High-Risk
CCGTGGACATAGGATA_18	High-Risk
CCGTGGACATGCCCGA_19	High-Risk
CCGTGGAGTACCCAAT_14	Background
CCGTGGAGTATATCCG_16	Background
CCGTGGAGTTAGGGTG_13	Background
CCGTGGAGTTAGGGTG_14	High-Risk
CCGTGGAGTTCCACAA_19	Background
CCGTGGATCAAAGACA_15	Background
CCGTGGATCTGGCGTG_19	Background
CCGTTCAAGACAATAC_20	High-Risk
CCGTTCAAGAGCTGCA_20	High-Risk
CCGTTCAAGGCAATTA_14	Background
CCGTTCAAGGCTACGA_19	High-Risk
CCGTTCAAGTAGATGT_19	High-Risk
CCGTTCAGTCACCTAA_20	Background
CCGTTCATCACATAGC_20	Background
CCGTTCATCCGCAGTG_20	High-Risk
CCGTTCATCCTAGTGA_20	Background
CCGTTCATCGATCCCT_20	High-Risk
CCGTTCATCGCCGTGA_13	High-Risk
CCGTTCATCGCCGTGA_14	High-Risk
CCTAAAGAGCAGGTCA_20	High-Risk
CCTAAAGAGTAATCCC_20	Background
CCTAAAGAGTGTGAAT_18	Background
CCTAAAGCACTTAAGC_14	Background
CCTAAAGGTAGAGCTG_19	High-Risk
CCTAAAGGTTTCCACC_15	Background
CCTAAAGTCCTTTCGG_13	Background
CCTAAAGTCCTTTCGG_14	High-Risk
CCTAAAGTCTACTTAC_20	High-Risk
CCTACACAGAACTCGG_15	Background
CCTACACAGACTAGGC_13	High-Risk
CCTACACAGAGCCTAG_19	High-Risk
CCTACACAGAGGTTAT_20	Background
CCTACACAGCCGCCTA_15	Background
CCTACACAGGAGCGTT_15	Background
CCTACACAGTGACATA_19	Background
CCTACACCACCATGTA_20	Background
CCTACACCACCCATGG_15	Background
CCTACACCACCCATGG_16	Background
CCTACACGTGTCGCTG_20	Background
CCTACACGTTGACGTT_14	Background
CCTACACGTTGACGTT_15	Background
CCTACACTCCGTTGTC_15	Background
CCTACCAAGCCAGAAC_19	Background
CCTACCAAGGAGCGAG_15	Background
CCTACCAAGTAGCGGT_20	High-Risk
CCTACCACAAACTGCT_20	Background
CCTACCACAGCTTAAC_20	Background
CCTACCACATGCTGGC_20	High-Risk
CCTACCAGTCCAGTAT_20	Background
CCTACCAGTCTTCGTC_18	Background
CCTACCAGTTCTGTTT_20	Background
CCTACCAGTTTGACAC_14	Background
CCTACCATCCAACCAA_14	Background
CCTACCATCTTAACCT_19	High-Risk
CCTACCATCTTCGAGA_20	High-Risk
CCTAGCTAGACAGAGA_18	Background
CCTAGCTCAGCCTTTC_14	Background
CCTAGCTGTACAGTGG_20	Background
CCTAGCTGTCCTGCTT_18	High-Risk
CCTAGCTGTGATAAGT_15	Background
CCTAGCTGTGTGGCTC_13	Background
CCTAGCTGTTCTGTTT_13	Background
CCTAGCTGTTGATTGC_20	Background
CCTAGCTTCCAAGTAC_14	Background
CCTAGCTTCCAAGTAC_15	Background
CCTATTACAAAGAATC_19	Background
CCTATTACACCAGGCT_18	High-Risk
CCTATTAGTATTCTCT_16	Background
CCTATTAGTTACGCGC_20	Background
CCTATTATCATAAAGG_15	Background
CCTCAGTAGCCGTCGT_19	Background
CCTCAGTAGGGCTTGA_19	Background
CCTCAGTCACCGTTGG_15	Background
CCTCAGTTCAAGATCC_19	High-Risk
CCTCAGTTCATCTGTT_20	Background
CCTCTGAAGCAGCCTC_20	Background
CCTCTGAAGCTGAAAT_20	Background
CCTCTGAAGTCAAGGC_20	High-Risk
CCTCTGAAGTTCGCAT_19	High-Risk
CCTCTGAGTATGGTTC_20	Background
CCTCTGAGTGTCCTCT_20	Background
CCTCTGAGTTCCTCCA_19	Background
CCTCTGATCAGCTTAG_14	Background
CCTCTGATCTGTACGA_20	Background
CCTTACGAGGGCATGT_14	Background
CCTTACGAGTCGCCGT_19	Background
CCTTACGCAGGCTGAA_20	High-Risk
CCTTACGGTGAGTGAC_13	Background
CCTTACGTCTCTGAGA_19	High-Risk
CCTTCCCAGAGTAATC_20	Background
CCTTCCCAGATCTGAA_18	High-Risk
CCTTCCCCAATCAGAA_18	High-Risk
CCTTCCCCACTCTGTC_19	Background
CCTTCCCTCCAAACAC_20	Background
CCTTCCCTCCAGATCA_13	Background
CCTTCCCTCGATCCCT_20	Background
CCTTCCCTCGTGGACC_19	Background
CCTTCCCTCTGTCTAT_14	Background
CCTTCGAAGGAGTTGC_15	Background
CCTTCGACACATTTCT_14	High-Risk
CCTTCGACACCATCCT_18	Background
CCTTCGACAGTAAGCG_19	Background
CCTTCGAGTCCATGAT_16	Background
CCTTCGATCGAATGGG_20	Background
CCTTCGATCGGTCTAA_13	Background
CCTTCGATCTGACCTC_20	Background
CCTTCGATCTTCCTTC_20	Background
CCTTTCTAGACAGAGA_18	Background
CCTTTCTAGAGTAAGG_19	High-Risk
CCTTTCTAGCACCGCT_19	Background
CCTTTCTAGTTTGCGT_20	Background
CCTTTCTCAAGACACG_15	Background
CCTTTCTCACCTGGTG_14	Background
CCTTTCTGTAGCAAAT_19	Background
CCTTTCTGTCTAGTCA_14	Background
CCTTTCTGTTACGCGC_20	Background
CCTTTCTTCAAACCGT_15	Background
CCTTTCTTCACGCATA_20	Background
CCTTTCTTCCCATTAT_20	Background
CCTTTCTTCTCCGGTT_20	Background
CCTTTCTTCTGGCGAC_20	Background
CGAACATAGCTCAACT_15	Background
CGAACATCAGATCTGT_20	High-Risk
CGAACATCAGTATGCT_20	Background
CGAACATCATGCAACT_20	Background
CGAACATCATGTAAGA_20	Background
CGAACATGTACCGTAT_18	Background
CGAACATGTATAATGG_19	High-Risk
CGAACATTCGGTCTAA_20	High-Risk
CGAACATTCGTCCAGG_20	Background
CGAATGTAGACTAGGC_15	Background
CGAATGTAGTGACATA_20	High-Risk
CGAATGTCATACAGCT_19	Background
CGAATGTCATATGAGA_19	Background
CGAATGTGTCAGCTAT_20	Background
CGAATGTGTTCGTGAT_15	Background
CGAATGTTCAACGCTA_15	Background
CGAATGTTCAATAAGG_19	Background
CGACCTTAGATCCCGC_20	High-Risk
CGACCTTAGCACACAG_13	Background
CGACCTTAGCACACAG_14	Background
CGACCTTAGTGAATTG_20	Background
CGACCTTCACCCTATC_20	Background
CGACCTTCACCTGGTG_20	High-Risk
CGACCTTCATAGTAAG_20	Background
CGACCTTGTCTCGTTC_15	High-Risk
CGACCTTGTGTTGAGG_13	Background
CGACCTTGTTAAGAAC_20	High-Risk
CGACCTTGTTTAGCTG_19	Background
CGACTTCAGCGATATA_20	High-Risk
CGACTTCAGGTGCAAC_14	Background
CGACTTCCACTGTGTA_20	Background
CGACTTCCAGGGTTAG_14	Background
CGACTTCCAGTATCTG_20	Background
CGACTTCTCAGGCGAA_19	Background
CGACTTCTCTGGCGTG_19	Background
CGAGAAGAGGAGTAGA_19	High-Risk
CGAGAAGAGTCCAGGA_13	High-Risk
CGAGAAGAGTGAAGAG_20	Background
CGAGAAGAGTGGGATC_18	Background
CGAGAAGCACAACGCC_19	High-Risk
CGAGAAGCACATCTTT_16	High-Risk
CGAGAAGGTACCGAGA_19	High-Risk
CGAGAAGGTCCATGAT_20	Background
CGAGAAGTCACGCGGT_13	Background
CGAGAAGTCCACGCAG_20	Background
CGAGAAGTCGTAGGAG_14	Background
CGAGAAGTCGTTGACA_18	Background
CGAGCACAGCAGGCTA_20	High-Risk
CGAGCACAGGGAGTAA_20	Background
CGAGCACAGTTTAGGA_20	High-Risk
CGAGCACCAAATACAG_16	Background
CGAGCACGTCTCTCTG_14	Background
CGAGCACGTTGGTTTG_14	High-Risk
CGAGCACTCACATACG_18	Background
CGAGCACTCGTTGACA_18	Background
CGAGCCAAGAACTGTA_20	High-Risk
CGAGCCAAGCGATCCC_20	Background
CGAGCCAAGCGATGAC_20	High-Risk
CGAGCCACAGAAGCAC_13	Background
CGAGCCACAGAAGCAC_14	High-Risk
CGAGCCACAGTTAACC_15	Background
CGAGCCAGTCGAATCT_20	Background
CGAGCCAGTCGCTTCT_18	Background
CGAGCCAGTTAGGGTG_18	High-Risk
CGAGCCATCAACACTG_16	Background
CGATCGGAGCTAGTTC_18	High-Risk
CGATCGGAGGGAGTAA_13	Background
CGATCGGAGGGAGTAA_14	Background
CGATCGGCAATCCAAC_13	Background
CGATCGGGTCGATTGT_19	Background
CGATCGGGTGTGACCC_19	Background
CGATCGGGTTGTCGCG_20	Background
CGATCGGTCGAGCCCA_19	Background
CGATGGCAGCGATATA_18	High-Risk
CGATGGCAGGGTTTCT_20	High-Risk
CGATGGCCACAACGTT_19	Background
CGATGGCCACATTTCT_19	High-Risk
CGATGGCCACGGTAAG_13	High-Risk
CGATGGCGTAAGTTCC_18	Background
CGATGGCGTCCGTTAA_20	Background
CGATGGCGTGAAATCA_15	Background
CGATGGCGTGATGTGG_20	Background
CGATGGCTCGTCACGG_19	Background
CGATGTAAGGAATTAC_15	Background
CGATGTAAGTAGCGGT_13	Background
CGATGTACATGCGCAC_14	Background
CGATGTACATTCTTAC_15	Background
CGATGTAGTCCGCTGA_19	Background
CGATGTAGTCTAGTGT_14	Background
CGATGTAGTTGAGTTC_13	Background
CGATGTATCTCAAACG_18	High-Risk
CGATTGACAATTGCTG_19	Background
CGATTGATCAACGCTA_20	Background
CGATTGATCGCGTAGC_19	Background
CGATTGATCGTACGGC_15	High-Risk
CGCCAAGAGCGTGAAC_15	Background
CGCCAAGAGGAATTAC_19	High-Risk
CGCCAAGCAAGAGGCT_19	Background
CGCCAAGCAAGCCATT_13	High-Risk
CGCCAAGCAGTAGAGC_20	Background
CGCCAAGGTCGCATCG_19	High-Risk
CGCCAAGGTCTCCCTA_19	Background
CGCCAAGGTTGTGGAG_14	High-Risk
CGCCAAGTCATGTGGT_20	High-Risk
CGCGGTAAGTCTCGGC_20	Background
CGCGGTAAGTTCCACA_15	Background
CGCGGTAAGTTGCAGG_19	Background
CGCGGTAAGTTTAGGA_20	Background
CGCGGTACACGACGAA_13	High-Risk
CGCGGTACATCTACGA_20	High-Risk
CGCGGTAGTTAAAGAC_18	Background
CGCGGTATCATGCATG_14	Background
CGCGGTATCCGCTGTT_20	High-Risk
CGCGGTATCCGTTGCT_13	Background
CGCGGTATCGCGTTTC_18	High-Risk
CGCGTTTAGACTAGGC_19	Background
CGCGTTTAGATCGATA_18	Background
CGCGTTTAGTGAACAT_13	High-Risk
CGCGTTTGTAAAGTCA_20	Background
CGCGTTTGTCGAATCT_20	Background
CGCGTTTTCTGTTGAG_19	Background
CGCTATCAGACGCAAC_13	High-Risk
CGCTATCCAAATCCGT_19	Background
CGCTGGACATACTCTT_20	Background
CGCTGGACATCTATGG_19	Background
CGCTGGAGTCGCGGTT_19	High-Risk
CGCTGGATCAAACAAG_15	Background
CGCTGGATCGTCCAGG_15	Background
CGCTTCAAGCTGAACG_14	Background
CGCTTCAAGGACCACA_20	Background
CGCTTCAAGTAATCCC_20	Background
CGCTTCACAGGAACGT_20	High-Risk
CGCTTCACATCGGTTA_13	Background
CGCTTCACATCGGTTA_14	Background
CGCTTCACATTCACTT_20	Background
CGCTTCAGTACCTACA_15	High-Risk
CGCTTCAGTACGCTGC_20	Background
CGCTTCAGTCTAGCCG_15	High-Risk
CGCTTCAGTCTCACCT_19	Background
CGCTTCAGTGAAAGAG_19	High-Risk
CGCTTCAGTTACCAGT_18	High-Risk
CGCTTCATCACAGGCC_20	Background
CGCTTCATCGCTTGTC_18	Background
CGGACACAGCCTTGAT_13	Background
CGGACACCAAACAACA_14	Background
CGGACACCAGACGCCT_20	Background
CGGACACCATACTACG_20	Background
CGGACACGTAATTGGA_18	Background
CGGACACGTTCCAACA_20	Background
CGGACGTAGGAGTTGC_20	Background
CGGACGTAGTCACGCC_18	Background
CGGACGTCACGTAAGG_19	Background
CGGACGTCACTATCTT_15	Background
CGGACGTCAGATAATG_20	High-Risk
CGGACGTCATCCCATC_14	Background
CGGACGTCATGAAGTA_20	Background
CGGACGTGTTCTGAAC_20	Background
CGGACGTTCATGCAAC_13	Background
CGGACTGCACGCCAGT_14	Background
CGGACTGCAGTTTACG_20	Background
CGGACTGGTAAACCTC_13	High-Risk
CGGACTGGTACCCAAT_13	Background
CGGACTGGTAGAGCTG_18	Background
CGGACTGGTCCGTGAC_14	Background
CGGACTGGTCGGCACT_20	High-Risk
CGGACTGTCAACTCTT_20	Background
CGGACTGTCGCCATAA_19	High-Risk
CGGACTGTCTGTCTCG_20	Background
CGGACTGTCTTACCGC_18	Background
CGGAGCTCACGGCTAC_20	High-Risk
CGGAGCTCAGCCTGTG_15	Background
CGGAGCTGTACGCACC_20	Background
CGGAGCTGTACTCGCG_19	Background
CGGAGCTGTATAAACG_20	High-Risk
CGGAGCTTCATCACCC_19	Background
CGGAGCTTCATCTGTT_15	Background
CGGAGCTTCTCGGACG_18	High-Risk
CGGAGTCCACGGATAG_19	High-Risk
CGGAGTCCAGGGATTG_20	Background
CGGAGTCGTCGGGTCT_20	Background
CGGAGTCGTTAAGACA_19	Background
CGGAGTCTCACCATAG_20	Background
CGGAGTCTCGCTTAGA_15	Background
CGGCTAGAGAGCTGGT_19	Background
CGGCTAGAGCCGATTT_18	Background
CGGCTAGAGGAATTAC_18	Background
CGGCTAGAGGGATACC_15	Background
CGGCTAGAGTTCCACA_13	Background
CGGCTAGCAGGTGCCT_20	Background
CGGCTAGGTAATTGGA_18	Background
CGGCTAGGTGAGCGAT_20	Background
CGGCTAGGTTTGACTG_20	Background
CGGCTAGTCATCGATG_20	Background
CGGCTAGTCCAGGGCT_19	Background
CGGGTCAAGACCTAGG_19	High-Risk
CGGGTCAAGGGTTCCC_19	High-Risk
CGGGTCAAGTTAGCGG_20	Background
CGGGTCACAGACGTAG_19	Background
CGGGTCACAGAGTGTG_15	High-Risk
CGGGTCACAGCGAACA_19	Background
CGGGTCACAGCTGCAC_19	High-Risk
CGGGTCACATCCTTGC_19	Background
CGGGTCAGTCTTGATG_19	Background
CGGGTCAGTTGCCTCT_14	Background
CGGGTCATCGCTTAGA_20	High-Risk
CGGGTCATCTCTAAGG_19	High-Risk
CGGGTCATCTGCCAGG_18	High-Risk
CGGTTAACAAAGCGGT_20	Background
CGGTTAACAACTTGAC_19	High-Risk
CGGTTAACACCGAAAG_13	High-Risk
CGGTTAACAGCCTGTG_20	Background
CGGTTAACATACTCTT_20	High-Risk
CGGTTAAGTAACGTTC_13	High-Risk
CGGTTAAGTATAGGGC_20	Background
CGGTTAAGTCGACTAT_13	High-Risk
CGGTTAAGTCTGATTG_19	Background
CGTAGCGAGAATCTCC_19	Background
CGTAGCGAGCAGACTG_20	Background
CGTAGCGAGGAATCGC_20	Background
CGTAGCGCATTATCTC_19	Background
CGTAGCGGTGTTGAGG_16	Background
CGTAGCGTCCTGCCAT_20	Background
CGTAGCGTCGCAAGCC_13	Background
CGTAGGCCATCGGAAG_19	Background
CGTAGGCCATTTCAGG_20	Background
CGTAGGCTCAACTCTT_19	Background
CGTAGGCTCCTCATTA_15	Background
CGTCACTAGCTAGGCA_20	Background
CGTCACTAGGGAAACA_15	Background
CGTCACTAGTGGAGTC_19	High-Risk
CGTCACTCAGGCTGAA_15	High-Risk
CGTCACTGTAAGCACG_20	Background
CGTCACTGTAGAGCTG_15	Background
CGTCACTGTCGCGAAA_19	Background
CGTCACTGTGGCAAAC_14	Background
CGTCACTGTTGGGACA_20	Background
CGTCAGGAGACAGGCT_18	Background
CGTCAGGAGCGTAGTG_15	Background
CGTCAGGAGGCCGAAT_15	High-Risk
CGTCAGGAGGTTACCT_19	High-Risk
CGTCAGGCAGGTGCCT_20	Background
CGTCAGGGTAGAAGGA_15	Background
CGTCAGGGTCGAGATG_19	High-Risk
CGTCAGGGTCTCGTTC_13	High-Risk
CGTCAGGGTCTCGTTC_14	High-Risk
CGTCCATAGAGGTTGC_20	Background
CGTCCATAGGGATGGG_20	Background
CGTCCATCAAGACGTG_20	High-Risk
CGTCCATCACCGATAT_19	High-Risk
CGTCCATTCACTGGGC_20	Background
CGTCCATTCGGCGCTA_20	High-Risk
CGTCTACAGCTGGAAC_20	High-Risk
CGTCTACAGGTGTTAA_19	Background
CGTCTACCAATTGCTG_20	Background
CGTCTACCATCCCACT_20	Background
CGTCTACGTCATGCAT_19	Background
CGTCTACTCATGTCTT_19	High-Risk
CGTGAGCAGAGTCGGT_15	Background
CGTGAGCAGTGAATTG_16	Background
CGTGAGCCAATGACCT_16	Background
CGTGAGCGTACATCCA_20	High-Risk
CGTGAGCGTATAGGTA_20	Background
CGTGAGCTCGAACGGA_20	Background
CGTGTAAAGATATGCA_20	High-Risk
CGTGTAAAGCGTGAGT_20	Background
CGTGTAACACAGAGGT_19	Background
CGTGTAACAGTACACT_15	Background
CGTGTCTAGAAAGTGG_14	Background
CGTGTCTAGGCATGTG_15	Background
CGTGTCTAGTTGAGAT_13	Background
CGTGTCTCACCGGAAA_14	Background
CGTGTCTCAGATAATG_19	Background
CGTGTCTCAGTCCTTC_15	Background
CGTGTCTGTAAGAGAG_19	High-Risk
CGTGTCTTCCACTCCA_16	Background
CGTTAGACAAGCTGAG_20	High-Risk
CGTTAGACATCACGAT_20	Background
CGTTCTGAGTCCCACG_18	Background
CGTTCTGAGTGAACAT_14	Background
CGTTCTGAGTGTTGAA_15	Background
CGTTCTGCATGCCCGA_19	Background
CGTTCTGGTAGTGAAT_13	Background
CGTTCTGGTAGTGAAT_14	Background
CGTTCTGGTCTAGTCA_19	Background
CGTTCTGGTCTCATCC_13	Background
CGTTCTGTCACGATGT_15	Background
CGTTCTGTCGAGGTAG_18	Background
CGTTCTGTCGCCGTGA_14	High-Risk
CGTTGGGAGGAGTTTA_20	Background
CGTTGGGAGGATGGAA_15	Background
CGTTGGGAGGCGCTCT_19	Background
CGTTGGGCAGTCAGAG_20	High-Risk
CGTTGGGCATATACGC_19	Background
CGTTGGGTCCACGCAG_20	Background
CGTTGGGTCGAACGGA_18	Background
CGTTGGGTCTTTACAC_13	Background
CTAACTTAGAGGTTAT_15	Background
CTAACTTAGCTGAACG_20	Background
CTAACTTAGGGATGGG_15	Background
CTAACTTGTAGCTAAA_20	High-Risk
CTAACTTTCAGTACGT_20	High-Risk
CTAAGACAGAGGACGG_19	Background
CTAAGACAGCGTAGTG_15	Background
CTAAGACAGGATGTAT_15	Background
CTAAGACGTATATGGA_15	Background
CTAAGACGTGCGGTAA_20	Background
CTAAGACGTTCGTGAT_20	High-Risk
CTAAGACTCAACGCTA_20	Background
CTAAGACTCACTCCTG_14	Background
CTAAGACTCCGAGCCA_20	Background
CTAAGACTCGTTGACA_19	Background
CTAATGGAGAGGGATA_20	Background
CTAATGGAGGAATGGA_13	Background
CTAATGGAGGCACATG_15	Background
CTAATGGAGTGTGGCA_13	High-Risk
CTAATGGCAGGCTCAC_15	Background
CTAATGGGTATCGCAT_15	Background
CTAATGGGTATGAATG_20	High-Risk
CTAATGGGTTAGATGA_14	Background
CTAATGGTCGAGGTAG_20	Background
CTAATGGTCGTAGGTT_13	Background
CTAATGGTCGTTTGCC_19	Background
CTACACCAGCCAGGAT_13	High-Risk
CTACACCAGCTAGCCC_13	Background
CTACACCGTGGTAACG_20	Background
CTACACCTCAGCAACT_16	Background
CTACATTAGTGGGCTA_20	Background
CTACATTCAATCCAAC_18	Background
CTACATTCAGGAATGC_15	Background
CTACATTTCCTTTACA_13	High-Risk
CTACATTTCTACTTAC_18	High-Risk
CTACATTTCTTGTCAT_19	Background
CTACCCAAGTAGCCGA_20	Background
CTACCCACACCAGATT_13	Background
CTACCCACACCAGATT_14	Background
CTACCCACACCATCCT_19	Background
CTACCCACAGATCGGA_20	Background
CTACCCAGTATAGTAG_20	Background
CTACCCAGTGTGTGCC_20	High-Risk
CTACCCAGTTTAAGCC_20	Background
CTACCCATCAACCAAC_20	High-Risk
CTACCCATCCAGGGCT_20	Background
CTACGTCAGACGCAAC_19	Background
CTACGTCAGCCATCGC_20	High-Risk
CTACGTCAGCCCTAAT_14	Background
CTACGTCAGCCCTAAT_20	Background
CTACGTCAGGACTGGT_20	Background
CTACGTCCACAGTCGC_15	High-Risk
CTACGTCCATCGGTTA_20	Background
CTACGTCGTAGATTAG_18	Background
CTACGTCGTAGGAGTC_20	High-Risk
CTACGTCGTCTAGAGG_15	Background
CTACGTCTCGGTGTTA_18	High-Risk
CTACGTCTCGTACGGC_13	Background
CTACGTCTCGTACGGC_14	High-Risk
CTACGTCTCTAGCACA_15	Background
CTAGAGTAGCAGATCG_20	High-Risk
CTAGAGTAGGCTAGAC_19	High-Risk
CTAGAGTAGGTAGCTG_18	Background
CTAGAGTGTCAAACTC_19	Background
CTAGAGTTCATTTGGG_16	Background
CTAGAGTTCCCGGATG_14	Background
CTAGAGTTCCGCATCT_14	High-Risk
CTAGAGTTCGTTTAGG_15	Background
CTAGCCTAGACACGAC_20	Background
CTAGCCTAGGAGTACC_19	Background
CTAGCCTAGGTGCACA_20	Background
CTAGCCTCAAGGACTG_19	Background
CTAGCCTCAAGGGTCA_15	High-Risk
CTAGCCTCAGGCGATA_20	Background
CTAGCCTCATGGTCTA_13	High-Risk
CTAGCCTGTAGCTAAA_19	Background
CTAGCCTGTCAGATAA_20	High-Risk
CTAGCCTGTTCTGTTT_20	High-Risk
CTAGCCTTCACATAGC_19	Background
CTAGCCTTCTGCGGCA_19	Background
CTAGCCTTCTTGCAAG_20	Background
CTAGTGAAGACTAAGT_13	Background
CTAGTGAAGACTAAGT_14	Background
CTAGTGAGTAGCCTCG_19	Background
CTCACACAGTGACATA_13	Background
CTCACACCACCAGCAC_20	Background
CTCACACCATCGATTG_19	Background
CTCACACGTCATATGC_20	Background
CTCACACTCAACGGCC_13	Background
CTCACACTCCCTCTTT_13	Background
CTCAGAAAGCGCCTTG_20	Background
CTCAGAAAGGATGGAA_14	Background
CTCAGAAAGGCAGTCA_19	Background
CTCAGAACAATCAGAA_14	Background
CTCAGAAGTACAGACG_18	Background
CTCAGAAGTAGCAAAT_20	High-Risk
CTCAGAAGTCAAAGCG_15	Background
CTCAGAAGTCGCATCG_13	Background
CTCAGAAGTCGCATCG_14	Background
CTCAGAAGTGGGTCAA_19	Background
CTCAGAAGTTGATTGC_14	Background
CTCAGAAGTTGATTGC_15	Background
CTCAGAATCAGTCAGT_19	Background
CTCAGAATCTCGATGA_13	Background
CTCAGAATCTGTTGAG_19	High-Risk
CTCATTAAGAGGTACC_18	Background
CTCATTACAGACACTT_19	High-Risk
CTCATTACATCGGACC_20	Background
CTCATTAGTTCGTTGA_20	Background
CTCATTATCGCATGGC_20	Background
CTCCTAGAGTTAAGTG_20	Background
CTCCTAGCAAGAAGAG_19	Background
CTCCTAGCAGGCTGAA_18	Background
CTCCTAGCATACTACG_20	High-Risk
CTCCTAGGTCGCTTTC_20	High-Risk
CTCCTAGGTCTCTTTA_19	High-Risk
CTCCTAGGTCTTCGTC_20	High-Risk
CTCCTAGTCAATCACG_13	Background
CTCCTAGTCACGATGT_19	Background
CTCCTAGTCGTAGGTT_19	High-Risk
CTCGAAAAGTGTACTC_20	Background
CTCGAAACAAACTGCT_19	Background
CTCGAAACATCTACGA_14	Background
CTCGAAACATGCATGT_18	Background
CTCGAAAGTAAATGAC_19	High-Risk
CTCGAAAGTAGCGATG_15	Background
CTCGAAAGTGCACGAA_20	High-Risk
CTCGAAAGTGTGGCTC_15	Background
CTCGAAATCACATACG_14	High-Risk
CTCGAAATCACTTATC_20	High-Risk
CTCGAGGAGCAGCGTA_20	Background
CTCGAGGAGGTCATCT_20	Background
CTCGAGGCATCCTAGA_19	Background
CTCGAGGCATTGGCGC_20	High-Risk
CTCGAGGGTTCCGGCA_18	Background
CTCGAGGGTTCGAATC_20	High-Risk
CTCGAGGTCAGTGCAT_20	Background
CTCGAGGTCGATGAGG_19	High-Risk
CTCGAGGTCTTGTACT_20	Background
CTCGGAGCAAGAGTCG_13	Background
CTCGGAGCACGCTTTC_14	High-Risk
CTCGGAGCAGTCGATT_20	Background
CTCGGAGGTAAAGGAG_19	Background
CTCGGAGTCACATGCA_20	High-Risk
CTCGGAGTCCGGCACA_20	High-Risk
CTCGGAGTCCTTGACC_20	High-Risk
CTCGGAGTCTCCCTGA_20	Background
CTCGGGACACTTAACG_13	Background
CTCGGGAGTACTTCTT_13	Background
CTCGGGAGTCTTGATG_14	Background
CTCGGGATCGTCCGTT_20	High-Risk
CTCGTACAGAACTGTA_19	High-Risk
CTCGTACAGCGACGTA_20	Background
CTCGTACGTCGCGAAA_20	Background
CTCGTACGTTTGGCGC_19	Background
CTCGTACTCATCGATG_14	Background
CTCGTACTCATCGATG_15	Background
CTCGTACTCGCGTTTC_18	Background
CTCGTCAAGTGGGATC_13	Background
CTCGTCACAATGGAGC_20	High-Risk
CTCGTCACACAGGCCT_20	Background
CTCGTCACACGTAAGG_19	High-Risk
CTCGTCACAGTGACAG_13	Background
CTCGTCAGTACGACCC_15	Background
CTCGTCAGTCCAGTGC_19	Background
[truncated: 2,103 more rows]

## Sheet: 4. Scissor Differential Genes
Gene	logfoldchanges	pvals	pvals_adj
ENO1	1.76669	5.64752e-25	6.8222e-22
LDHA	1.26094	4.7488e-16	2.86828e-13
TUBB	1.24968	9.44498e-11	2.28191e-08
NDUFA4L2	2.47894	6.97216e-08	8.42237e-06
BNIP3	1.479	4.95708e-05	0.00199605
PRDX1	0.486079	0.000441676	0.00741034
RBP1	0.880092	0.00222239	0.0209738
CENPW	1.20443	0.00420122	0.0311354
PFN1	0.351389	0.00434386	0.0316198
CA9	1.28348	0.0175228	0.0709116
PLOD2	1.15213	0.0458898	0.119312
MT2A	0.261939	0.0579276	0.13241
CSTB	0.16599	0.0669339	0.14276
GBE1	1.47196	0.0878262	0.164817
ANXA3	1.17232	0.139404	0.211028
SERPINB4	1.10535	0.160859	0.230507
KRT17	0.998453	0.161827	0.23162
MYL9	0.995683	0.176819	0.244671
NQO1	0.635478	0.18016	0.24675
PTTG1	0.66123	0.220765	0.286142
NUSAP1	0.7868	0.243805	0.307108
HMGB3	0.170644	0.273856	0.335856
TUBA1A	0.361229	0.286461	0.347086
CDK1	0.86232	0.294093	0.35491
S100A7	0.676505	0.307371	0.365817
CLSPN	0.817379	0.461044	0.504933
CENPN	0.621973	0.474031	0.51643
HMGB2	0.306547	0.56073	0.592618
KPNA2	0.469319	0.603843	0.634298
MAD2L1	0.350392	0.720676	0.741547
ARF4	0.113447	0.766629	0.78682
NUPR1	0.135489	0.784291	0.802901
KNSTRN	0.346889	0.842901	0.856371
CDC20	0.2361	0.855775	0.86799
SLC2A1	0.318525	0.921235	0.928614
IFIT3	0.199706	0.935358	0.94081
CRABP2	0.167177	0.946073	0.950795
AURKA	0.273801	0.970939	0.973356
S100A16	0.0833926	0.991619	0.991619
RFC4	0.243676	0.986649	0.987466
NT5C3A	0.270003	0.982288	0.983917
TPM1	0.110605	0.957795	0.960977
MUCL1	0.113261	0.95456	0.958527
HCFC1R1	0.234651	0.9314	0.93761
CCNB2	0.173027	0.921696	0.928614
CCNB1	0.211513	0.909073	0.917427
CKS1B	0.132374	0.893454	0.902419
TOP2A	0.175201	0.893237	0.902419
CDA	0.320745	0.881442	0.891777
PLP2	0.198015	0.872606	0.883578
GOLT1B	0.327004	0.860763	0.872316
PDCD2L	0.343282	0.850314	0.863176
NUF2	-0.116078	0.836098	0.850174
UBE2C	-0.0316812	0.833523	0.84827
TPX2	0.0824059	0.826452	0.841782
TFPT	0.211063	0.814769	0.830583
KRT7	-0.46498	0.809771	0.826185
XRCC4	0.269308	0.802088	0.819038
RB1	0.392792	0.792163	0.809588
ANKRD37	0.170543	0.785769	0.803734
NDRG1	-0.00499555	0.784032	0.802901
PRC1	-0.0610511	0.774942	0.794678
EZH2	0.288558	0.763693	0.784474
ACOT7	0.204205	0.738025	0.758753
CENPU	0.100923	0.717296	0.738699
S100A2	0.291405	0.709234	0.731019
SUPT3H	-0.00977142	0.708984	0.731019
CCDC82	0.168793	0.699327	0.72204
UBE2T	0.0872137	0.694245	0.717407
ARRB2	0.209919	0.688121	0.711687
LMCD1	0.067939	0.679532	0.703406
VIM	0.182544	0.676001	0.70035
SP140L	0.0894687	0.672588	0.697413
HCCS	0.00154039	0.664695	0.689821
WDR77	0.0681973	0.65927	0.684779
FAIM	0.139258	0.653686	0.679564
FAM3A	0.0897309	0.651705	0.678087
VRK1	0.0878264	0.649066	0.675924
MRPS6	0.0978125	0.641549	0.668672
ASNSD1	0.162905	0.640085	0.667723
FABP5	0.00600073	0.639736	0.667723
IFI6	-0.283599	0.626777	0.654971
ORC3	0.0503151	0.624246	0.652891
NMB	-0.0956868	0.622303	0.651423
RPP30	0.115101	0.61795	0.647427
TOLLIP	0.318408	0.615542	0.645464
GSN	-0.0770898	0.609221	0.63939
FAM111B	-0.0415467	0.586558	0.616677
ENOPH1	0.22401	0.583578	0.614078
PRIM1	0.0723299	0.576365	0.607018
RTP4	-0.309647	0.566298	0.596935
RFC3	0.0196879	0.564728	0.595801
ATP5S	-0.0761213	0.563016	0.594513
RRS1	-0.165633	0.552061	0.583967
TMEM106C	-0.000637213	0.549696	0.581974
NUBP1	0.21984	0.549186	0.581945
NCOA7	-0.15445	0.548861	0.581945
MOCS2	0.0959509	0.547213	0.580873
CLEC2B	-0.0724859	0.54433	0.578321
PKIG	-0.137022	0.542244	0.576611
ANAPC10	0.0428204	0.539213	0.573893
BIRC5	-0.203555	0.533698	0.568525
NEK7	-0.225276	0.530691	0.565821
PPP1R1B	0.232841	0.530531	0.565821
MRPL40	0.0243109	0.522377	0.557941
HERC6	-0.233643	0.522218	0.557941
TK1	-0.0286294	0.519997	0.556383
ID1	-0.0271638	0.51877	0.555562
RPL39L	0.0688664	0.517326	0.554508
FBXO2	0.0439881	0.51705	0.554508
G6PD	-0.0951003	0.510945	0.548642
UBE2W	0.0597561	0.5092	0.547254
COTL1	-0.116563	0.505055	0.543282
CCL5	-0.0702309	0.503164	0.541731
PIM1	-0.0233756	0.495774	0.53425
AGPAT5	-0.0683233	0.495349	0.53425
MB	-0.0938163	0.495059	0.53425
MAEA	-0.256429	0.491168	0.530707
HIST1H2AE	-0.269063	0.490303	0.530247
PUS1	-0.0089982	0.487963	0.528189
U2AF1L4	-0.0854701	0.485954	0.526486
RHOV	-0.0471628	0.484731	0.525633
PRPS2	-0.105852	0.484273	0.525608
FBXL15	-0.0423176	0.478246	0.519534
PLS1	-0.0726245	0.477224	0.518889
SUV39H2	-0.0285014	0.477091	0.518889
VRK2	-0.0336146	0.474106	0.51643
CALML5	-0.323056	0.469086	0.511884
RPE	0.122163	0.465924	0.508893
GGH	-0.194298	0.46376	0.506988
JCHAIN	-0.0512168	0.463536	0.506988
LRRC40	-0.127904	0.460766	0.504933
PHLDA2	-0.176088	0.460209	0.504933
PCGF5	0.0834027	0.456304	0.501105
IFI27L1	-0.20484	0.455419	0.500588
CHCHD6	-0.194184	0.451757	0.497015
PTN	-0.228842	0.451445	0.497015
CMC2	0.00477185	0.449173	0.495074
BPGM	-0.13704	0.448954	0.495074
WDR72	-0.36035	0.448478	0.495074
LAP3	-0.0698409	0.440005	0.4863
MRPS31	-0.174556	0.434474	0.480626
NUDT15	-0.00303481	0.431839	0.47815
SMIM4	-0.124519	0.429749	0.476272
TUBE1	-0.301824	0.427398	0.474102
EGLN3	-0.406319	0.426545	0.47359
EPS8L1	-0.0963593	0.426225	0.47359
SRGAP1	-0.369719	0.424045	0.471682
PDLIM5	0.0959331	0.423744	0.471682
DCP1A	-0.0542556	0.419281	0.467244
RAD51AP1	-0.269653	0.418262	0.466538
CALD1	-0.0487242	0.415651	0.464054
YEATS4	0.0369741	0.4142	0.462862
LARP6	-0.547126	0.412875	0.461808
HMOX1	-0.309595	0.412544	0.461808
C12orf29	-0.141007	0.409191	0.458536
CYFIP1	0.102586	0.408965	0.458536
TYW3	-0.334147	0.40632	0.456165
C6orf203	-0.119121	0.402224	0.451988
PGAP2	-0.237125	0.40207	0.451988
RGS19	-0.0786176	0.398734	0.4489
MTFR1	-0.156097	0.397285	0.447686
MTERF3	-0.206072	0.395839	0.446474
CREB3	-0.0307278	0.39516	0.446124
SLC9A3R1	-0.185694	0.393515	0.444683
DDX60	-0.54286	0.391537	0.442862
CLIC3	-0.15573	0.390863	0.442514
CENPF	-0.46017	0.388926	0.440735
PHAX	-0.182739	0.388086	0.440196
PEMT	-0.255262	0.386192	0.438459
GALE	-0.0181933	0.384437	0.436877
PSMD5	-0.370889	0.384404	0.436877
ACTR1A	-0.0969834	0.380411	0.433116
BCL2L13	-0.0183183	0.379582	0.43258
TMEM167B	-0.347381	0.378374	0.431611
SLC7A6OS	-0.286112	0.378044	0.431611
TUBB6	-0.233021	0.377697	0.431611
SFN	-0.0972701	0.377532	0.431611
SLC25A24	-0.0654684	0.377416	0.431611
ICMT	0.0210324	0.376971	0.431611
RHOD	-0.113585	0.373353	0.42831
CXCL13	-0.658909	0.369464	0.424252
NUDT2	-0.100526	0.36701	0.421834
FNBP1	-0.108676	0.365973	0.421043
EBAG9	-0.110053	0.365067	0.420401
TEX30	-0.328324	0.364647	0.420318
FAM111A	-0.331567	0.364501	0.420318
PRR34-AS1	-0.130326	0.360718	0.416585
F3	-0.512471	0.360413	0.416585
C12orf75	0.0404119	0.359468	0.415936
DR1	-0.0673809	0.357326	0.413855
YKT6	-0.557986	0.35155	0.407555
IDO1	-0.286138	0.349486	0.405551
POLD3	-0.182705	0.349407	0.405551
BIK	-0.213355	0.349266	0.405551
PDLIM4	-0.200933	0.349203	0.405551
GNLY	-0.0593921	0.347821	0.405176
MITD1	-0.14117	0.347445	0.405129
RABEP1	-0.653717	0.342438	0.399676
ZNF770	-0.442563	0.3378	0.394645
USP10	-0.31146	0.335482	0.392315
SDCBP	-0.0548213	0.334059	0.39103
CENPH	-0.0569066	0.332868	0.390014
DUSP11	-0.188475	0.332122	0.389517
IFIT1	-0.46624	0.331848	0.389517
RAB27A	-0.403929	0.331467	0.389506
ZNF576	-0.581508	0.329283	0.387316
RIPK2	-0.23348	0.327892	0.386056
MTFR1L	-0.517787	0.321814	0.37927
SAMD9	-0.395393	0.320087	0.377603
C8orf76	-0.355609	0.320013	0.377603
RALB	-0.028177	0.315148	0.372504
CAB39	-0.234691	0.312346	0.369554
ABCD3	-0.248924	0.311295	0.36867
CKAP2	-0.406245	0.31093	0.3686
SERTAD3	-0.237452	0.310565	0.36853
TSR2	-0.396231	0.308936	0.366957
CKAP5	-0.411886	0.308661	0.366957
CBR1	-0.221352	0.307009	0.365747
CDK2	-0.470502	0.306807	0.365747
ETS2	-0.180592	0.306301	0.365624
CCDC77	-0.451576	0.304327	0.363628
CRTAP	-0.468028	0.303164	0.362597
RAB9A	-0.569798	0.301961	0.361516
C1GALT1	-0.283501	0.301618	0.361463
NFU1	-0.217484	0.301533	0.361463
PXMP2	-0.0798656	0.300334	0.36064
GADD45A	-0.0851129	0.299864	0.360433
WFDC3	-0.335344	0.298017	0.35857
WRAP73	-0.245398	0.296051	0.35656
SLC35B3	-0.438453	0.294656	0.355234
ASS1	-0.290693	0.292859	0.353773
FBXO32	-0.118254	0.287345	0.34746
PPP1CB	-0.401645	0.287345	0.34746
CCND1	-0.323216	0.285702	0.346514
GBP1	-0.337631	0.285371	0.346461
CLDN23	-0.532849	0.28522	0.346461
TRIB3	-0.57664	0.281452	0.34239
KIF20B	-0.677664	0.280443	0.341508
CENPM	-0.359152	0.280266	0.341508
GSKIP	-0.431208	0.279641	0.341219
TGFBI	-0.613079	0.279465	0.341219
MRPS17	-0.416143	0.279288	0.341219
ADM	-0.548979	0.277163	0.339223
BCL7B	-0.401253	0.276772	0.339088
SPRR2D	-0.492639	0.272479	0.334507
SNRNP40	-0.128277	0.272399	0.334507
B3GAT3	-0.230949	0.271679	0.334204
PHF1	-0.542665	0.271386	0.334184
SREBF1	-0.599394	0.269886	0.332675
CARD16	-0.533291	0.268258	0.331007
C6orf226	-0.556282	0.26723	0.330076
MT1F	-0.271398	0.266875	0.329974
ILKAP	-0.239557	0.264501	0.327374
WARS	-0.236458	0.264501	0.327374
LGALS1	-0.235962	0.264187	0.327374
OVOL2	-0.504645	0.264109	0.327374
TBC1D22A	-0.553442	0.26317	0.327067
ZSCAN16-AS1	-0.303461	0.262363	0.3264
MAP2K1	-0.259557	0.26183	0.326073
RANGRF	-0.468034	0.25748	0.320987
C1S	-0.90642	0.257416	0.320987
C11orf1	-0.246626	0.251915	0.314698
TMEM18	-0.333767	0.250892	0.313745
TP53I3	-0.256842	0.247518	0.309846
ICAM3	-0.630087	0.246546	0.308949
STEAP1	-0.620584	0.246272	0.308927
RAB35	-0.469884	0.245911	0.308795
PPID	-0.140966	0.245489	0.308585
SH3GL1	-0.5691	0.245092	0.308407
ST20	-0.618663	0.243126	0.306572
ACP5	-0.649646	0.242252	0.305789
DNAJC12	-0.712095	0.241969	0.305752
PSPC1	-0.508732	0.241392	0.305342
SPSB2	-0.602518	0.240436	0.304452
RERG	-0.546647	0.23952	0.30361
MGLL	-0.211601	0.239349	0.30361
FKBP7	-0.793545	0.23885	0.303397
RPUSD3	-0.621629	0.23829	0.303005
PHACTR2	-0.744878	0.237319	0.302088
KATNA1	-0.466161	0.237101	0.302088
DYNLT3	-0.436711	0.235422	0.300306
PIGQ	-0.765603	0.235373	0.300306
RASSF1	-0.640277	0.235145	0.300306
ECD	-0.90741	0.234291	0.299813
CORO1C	-0.282523	0.23247	0.297798
SARNP	-0.272501	0.232458	0.297798
ZMAT5	-0.139089	0.230671	0.296122
APOL3	-0.814214	0.229344	0.294731
HPCAL1	-0.100721	0.22919	0.294731
P4HA1	-0.244347	0.229143	0.294731
CDV3	-0.896943	0.229001	0.294731
TMEM203	-0.670961	0.227421	0.293509
DUSP22	-0.386213	0.22565	0.291535
DENND1B	-0.439141	0.225592	0.291535
XPO5	-0.950847	0.22281	0.288482
PPP2CB	-0.557852	0.219616	0.284958
ATP2B1	-0.941384	0.217889	0.283021
TFF3	-0.79438	0.217593	0.282941
PEX10	-0.70228	0.216705	0.28209
BTBD1	-0.940025	0.21599	0.281463
RPL26L1	-0.581795	0.215413	0.281014
AZI2	-0.155302	0.215017	0.280801
EIF2B2	-0.832202	0.214104	0.27991
CTDSPL2	-0.623699	0.213328	0.279198
MT1X	-0.23773	0.213126	0.279198
SRFBP1	-0.472917	0.213069	0.279198
SH3BGRL	-0.328274	0.212632	0.279195
CDKAL1	-0.391165	0.212632	0.279195
YIPF5	-0.316926	0.212318	0.279195
EHBP1	-1.06575	0.208559	0.274743
SPP1	-0.20897	0.207974	0.274272
TAPBPL	-0.223752	0.207027	0.273321
MYCBP	-0.31312	0.206939	0.273321
MISP	-0.588372	0.206808	0.273321
PDE6D	-0.590841	0.204761	0.271219
SBDS	-0.173358	0.202838	0.268966
STARD3NL	-0.965389	0.201984	0.268128
MRPS27	-0.750865	0.201552	0.267849
GEMIN7	-0.168848	0.200853	0.267213
ERO1A	-0.228499	0.200788	0.267213
AQP5	-0.594239	0.199031	0.265374
CEP70	-0.385244	0.196712	0.262573
LINC00467	-0.419367	0.196702	0.262573
MYO1C	-0.375217	0.195634	0.261713
DNAJB14	-0.870273	0.195181	0.261396
DDIT3	-0.202705	0.195045	0.261396
LAMC2	-0.555404	0.194487	0.261045
GLB1	-0.70793	0.194152	0.260884
CDK2AP2	-0.273062	0.193168	0.259851
RBBP5	-0.734538	0.192792	0.259635
GBP5	-0.605037	0.19225	0.259194
TAF6	-0.669059	0.190186	0.256698
NECAP1	-0.396531	0.190165	0.256698
DCUN1D5	-0.414224	0.188087	0.254434
MKNK1	-0.698054	0.188067	0.254434
CD82	-0.800733	0.187473	0.254172
ACAT1	-0.516171	0.187136	0.254
DESI1	-0.754816	0.185447	0.251991
GNPNAT1	-0.910488	0.183629	0.249801
TRMT61B	-0.492938	0.183377	0.24974
TRIM37	-0.675553	0.182123	0.248313
ACOX1	-0.708084	0.181803	0.248157
CCDC58	-0.247713	0.181554	0.248096
ZNF544	-0.954278	0.180458	0.246878
PURB	-1.09978	0.179942	0.246731
ISOC1	-0.553634	0.179893	0.246731
TBK1	-0.965581	0.179744	0.246731
SLC4A1AP	-0.742779	0.179724	0.246731
HSD17B12	-0.343943	0.179417	0.246731
APOBEC3C	-1.27349	0.178627	0.246326
MAPKAP1	-0.35329	0.177633	0.245235
TDP2	-0.307641	0.177221	0.244946
IQCG	-0.812584	0.176321	0.244261
SETD9	-0.829462	0.176262	0.244261
CHTF8	-0.550068	0.176018	0.244261
UGDH	-0.430406	0.175716	0.244261
STRN3	-0.713103	0.174987	0.24353
SMCO4	-0.606761	0.174618	0.243297
ERLIN2	-0.936587	0.174579	0.243297
KIF9	-0.637748	0.174405	0.243297
SNX1	-0.352212	0.174104	0.243297
APOL4	-0.728278	0.17337	0.242678
UBE3B	-1.09266	0.172966	0.242393
BACE2	-0.530069	0.172831	0.242393
TMEM63B	-0.917488	0.171612	0.241055
BDH2	-0.369598	0.171488	0.241055
TIMM8A	-0.52644	0.171	0.240756
ARFGAP3	-0.325599	0.16981	0.239359
SGMS1	-0.613409	0.168967	0.238448
PRR7	-0.784798	0.168258	0.237726
LYAR	-0.592763	0.167552	0.237006
TRAF2	-1.1015	0.16682	0.236247
POLR1E	-0.612395	0.166221	0.235675
CCDC25	-0.26571	0.165456	0.234866
USB1	-0.570168	0.164258	0.23344
DSC2	-0.591634	0.164231	0.23344
CETN3	-0.307691	0.163824	0.233371
SPR	-0.675229	0.163325	0.232936
C1orf52	-0.415598	0.162772	0.232422
SAMD9L	-1.13745	0.162047	0.23166
DCPS	-0.551507	0.160285	0.229958
MTHFD2L	-0.704969	0.159559	0.229188
RIN2	-0.649674	0.15879	0.228355
EDN1	-0.849199	0.158366	0.228017
HSCB	-0.475318	0.157746	0.227395
NRBP1	-0.325012	0.15667	0.226115
IMPACT	-0.665247	0.156438	0.226049
DNAJB9	-0.579287	0.15618	0.225946
RHOF	-0.903756	0.156117	0.225946
PXN	-0.808695	0.156046	0.225946
MFN1	-0.489852	0.155583	0.225895
BLOC1S6	-0.644208	0.155086	0.225444
PTGR1	-0.242968	0.15505	0.225444
MIB2	-1.11256	0.155015	0.225444
SEPT11	-0.526573	0.154811	0.225444
CHIC2	-0.372181	0.154219	0.225268
TMEM183A	-0.452691	0.154078	0.225268
WDR45	-0.596112	0.15369	0.225039
TNFAIP8	-0.545225	0.153223	0.224629
HNMT	-0.448121	0.153127	0.224629
ZBTB7A	-1.02666	0.15296	0.224629
NFS1	-1.0743	0.152688	0.224629
RECQL	-0.551298	0.152653	0.224629
ATXN1	-0.636619	0.150952	0.222649
RNF34	-0.558448	0.150094	0.221654
MEF2A	-0.898904	0.150042	0.221654
APOL2	-0.526518	0.149662	0.221558
EFR3A	-0.457146	0.149188	0.221127
PPM1A	-0.495251	0.148801	0.220824
BET1	-0.179889	0.148449	0.220573
PGGT1B	-1.10319	0.148389	0.220573
MIF4GD	-0.449755	0.147687	0.219982
TTC9C	-0.581945	0.146588	0.218615
NTMT1	-0.261801	0.144981	0.216485
PJA2	-0.341756	0.144678	0.2163
RALGAPB	-1.00035	0.14312	0.214236
RNF10	-0.265951	0.142953	0.214236
PLEKHO1	-0.615716	0.142795	0.214236
NKG7	-0.957754	0.142653	0.214236
GBP4	-0.659465	0.141823	0.213353
ARL4A	-0.51497	0.141525	0.21317
RPP25L	-0.440755	0.141269	0.21305
RFK	-0.487667	0.140684	0.212433
CDC42SE2	-0.515528	0.140314	0.212139
PLS3	-0.976112	0.139241	0.211028
PIGK	-0.819602	0.138882	0.210766
HOXB7	-0.281666	0.13867	0.210709
RAB8A	-0.549752	0.138264	0.210356
SIX1	-0.290751	0.137647	0.209682
MRAS	-0.936034	0.137494	0.209682
TRPT1	-0.277597	0.137389	0.209682
KCNK1	-1.14735	0.137364	0.209682
DCK	-0.596472	0.136429	0.208881
CASP2	-1.03404	0.136237	0.20885
EMC8	-0.691256	0.135844	0.208512
NDUFAF2	-0.342681	0.135348	0.208015
MSN	-0.514293	0.135268	0.208015
C7orf49	-0.620822	0.134734	0.2076
PTRH1	-0.609387	0.134527	0.207546
TNKS2	-0.954318	0.134376	0.207546
WDR18	-0.389405	0.134272	0.207546
DNAJC11	-0.980912	0.134161	0.207546
SPOPL	-0.95911	0.134058	0.207546
LAMTOR3	-0.623359	0.133805	0.207546
IQCB1	-0.511754	0.133456	0.207484
DVL3	-0.918122	0.132896	0.20688
MIR4435-2HG	-0.446243	0.132786	0.20688
EMP1	-0.432812	0.132165	0.206273
RCAN3	-0.606804	0.131946	0.206197
PLBD1	-0.795359	0.13157	0.205877
FCER1G	-0.55089	0.13132	0.205752
BPNT1	-0.736306	0.130837	0.205261
SOS1	-1.40818	0.130806	0.205261
IFT43	-0.339504	0.130767	0.205261
UPP1	-0.669772	0.130363	0.205261
RPA1	-0.596639	0.130123	0.205206
TM9SF4	-0.704367	0.130061	0.205206
QKI	-0.917725	0.129983	0.205206
SSFA2	-0.826632	0.129898	0.205206
RPS6KB2	-0.292335	0.12955	0.205206
FAM114A1	-0.352861	0.129349	0.205206
NQO2	-0.457066	0.129118	0.205206
ARID5A	-0.680134	0.128235	0.204094
MAP1LC3A	-0.437025	0.128043	0.204058
RLF	-1.17326	0.12786	0.204035
SNCG	-0.729034	0.127783	0.204035
RIT1	-0.399928	0.126573	0.202516
C6orf132	-0.730856	0.126497	0.202516
ARL2BP	-0.894813	0.126186	0.202435
NUP153	-1.15574	0.126156	0.202435
GTPBP8	-0.97759	0.125854	0.202435
FBXO11	-1.16474	0.12492	0.201205
MESP1	-0.363357	0.124598	0.200953
FAM98C	-0.630888	0.124411	0.20092
RCN3	-1.0885	0.124321	0.20092
OPN3	-0.712382	0.124268	0.20092
TBC1D10A	-1.11873	0.123962	0.20092
PLEKHA4	-1.33224	0.123925	0.20092
CBLC	-1.05294	0.123389	0.20061
ZC3H12A	-1.02457	0.123262	0.20061
MAP1B	-1.06564	0.123047	0.200595
CYB5R1	-0.45925	0.122891	0.200595
YWHAH	-0.242178	0.12227	0.199867
RARRES1	-0.646862	0.122115	0.199867
PSEN1	-1.30468	0.12196	0.199867
ELK3	-0.816502	0.121475	0.199377
RAB31	-0.725431	0.120428	0.197927
SLF1	-1.03822	0.120406	0.197927
NAA60	-0.61231	0.120333	0.197927
DST	-1.2803	0.119707	0.19755
PHACTR3	-0.940991	0.118298	0.195491
PLAU	-1.07511	0.118089	0.195413
STAU2	-0.538173	0.117594	0.194861
DCUN1D1	-0.533809	0.117323	0.194678
AP1G1	-1.52543	0.116901	0.194246
TM7SF3	-0.538397	0.116652	0.194099
ELK4	-1.10196	0.116517	0.194099
CCNK	-1.20837	0.116389	0.194099
TP53TG1	-0.775418	0.116098	0.193979
ARID1B	-1.59586	0.1159	0.193915
BORCS7	-0.975202	0.115433	0.193403
ORC2	-1.03188	0.115081	0.19308
SPTAN1	-0.68975	0.114456	0.192298
INTS1	-1.48547	0.114252	0.192224
DTYMK	-0.311953	0.114224	0.192224
BARD1	-0.636941	0.113617	0.191689
GZMB	-1.51488	0.113464	0.191689
LGMN	-0.276846	0.113464	0.191689
STX8	-0.489467	0.112637	0.190836
RAB30-AS1	-0.434416	0.111947	0.189932
JKAMP	-0.776761	0.110699	0.188079
FDX1	-0.448195	0.110296	0.187659
EPPK1	-1.46495	0.109902	0.187252
TREM1	-0.722006	0.109211	0.186338
TMTC3	-1.50062	0.108881	0.186037
LYZ	-0.929641	0.108168	0.185081
CCDC88C	-1.05305	0.108074	0.185081
LARP1B	-0.891023	0.107947	0.185081
IFI35	-0.36479	0.107239	0.184275
NAT9	-1.08993	0.105881	0.1822
TTC39B	-1.09022	0.105671	0.182097
CPM	-0.887807	0.105539	0.182097
UBR4	-0.975696	0.105303	0.181982
RRAS	-1.32553	0.10508	0.181857
SOD2	-0.385402	0.104818	0.181664
CST6	-0.938991	0.103639	0.17988
ARSD	-0.851694	0.103536	0.17988
CNOT1	-0.826299	0.103523	0.17988
ECE2	-0.948522	0.101767	0.177395
SIKE1	-0.502865	0.101684	0.177395
ZFYVE21	-0.696583	0.101187	0.176895
HLA-B	-0.593299	0.101187	0.176895
CNKSR3	-1.3145	0.10099	0.176895
ANGPTL4	-0.777553	0.10054	0.17653
DNAJA2	-0.393615	0.0992376	0.174496
THAP1	-1.02943	0.0991813	0.174496
MXD1	-0.761993	0.0991688	0.174496
BCAT2	-0.750246	0.0989437	0.174496
USE1	-0.495014	0.0989125	0.174496
SLC18B1	-1.25432	0.0989062	0.174496
TMEM128	-1.2768	0.0982462	0.174275
GPX4	-0.535615	0.0982151	0.174275
UCHL5	-0.526286	0.097602	0.173642
STXBP3	-1.24551	0.0974414	0.173612
ZFAND2B	-0.417853	0.0971949	0.173429
WBP4	-0.743818	0.0970657	0.173429
PTRH2	-0.807642	0.0968813	0.173382
NIPA2	-0.704258	0.0963665	0.172716
KIAA1143	-1.01842	0.0961954	0.172666
C12orf76	-0.807293	0.0960367	0.172637
ZFAND2A	-0.681744	0.0957626	0.172401
UTP23	-0.749525	0.0952526	0.171739
EMC2	-0.479196	0.0951738	0.171739
SCYL2	-0.837852	0.0950951	0.171739
NUDT22	-0.479517	0.0947146	0.171537
GTF2E2	-0.538315	0.094606	0.171537
SLMAP	-1.16862	0.094239	0.171189
CCDC174	-0.956769	0.0937056	0.170477
CCL18	-1.76359	0.093413	0.1702
FAM207A	-0.553714	0.0933295	0.1702
MKLN1	-0.958636	0.0932878	0.1702
ZCCHC6	-1.25999	0.0930259	0.1702
NR2C2AP	-0.783192	0.0920551	0.168744
TMED7	-0.535064	0.0919608	0.168744
CASP4	-0.518323	0.0918725	0.168744
UROD	-0.339902	0.0915023	0.168498
TRIM47	-0.634054	0.0911684	0.16814
EEA1	-0.868504	0.0911157	0.16814
EMP3	-0.759813	0.0907946	0.167963
EMC6	-0.299225	0.0906431	0.16794
THUMPD2	-0.878548	0.0898136	0.166659
COPG1	-0.906806	0.089525	0.166379
TNNC2	-0.747278	0.0895135	0.166379
GABARAPL1	-0.919067	0.0889845	0.165885
MAP7D1	-1.67026	0.0886981	0.165606
FMR1	-1.04665	0.0883268	0.165168
KIAA1551	-1.7259	0.0881673	0.165126
C2	-1.22025	0.0878659	0.164817
SHOC2	-0.962863	0.087373	0.164403
SIPA1	-0.428527	0.0869668	0.163894
TEAD2	-0.647432	0.0868093	0.163852
CHCHD7	-0.852341	0.0857295	0.162068
CBX6	-1.94838	0.0855348	0.161953
C15orf40	-0.697889	0.0854904	0.161953
PEA15	-0.673216	0.0854848	0.161953
SPECC1	-0.939808	0.0854626	0.161953
INSIG2	-0.43685	0.0854238	0.161953
C5orf56	-1.78649	0.085396	0.161953
UBA3	-0.598799	0.0851632	0.161953
CD3D	-1.54964	0.0848978	0.161953
IRAK1	-1.18078	0.0846606	0.161953
TSPYL1	-0.525174	0.0842921	0.161884
MCRS1	-0.788004	0.0840836	0.16174
BAIAP2L1	-0.536108	0.08381	0.161471
ANKRD13A	-1.58615	0.0826524	0.159495
APOL1	-0.702184	0.0824095	0.159281
NUTF2	-0.299958	0.082361	0.159281
C19orf33	-0.758374	0.0820651	0.159125
CTBP1	-1.16543	0.0815506	0.158381
ATL3	-0.80964	0.081337	0.158221
MED28	-0.402102	0.0810281	0.157874
THAP7	-0.768414	0.0809802	0.157874
NELFA	-1.69737	0.0807943	0.157874
HCST	-1.23245	0.0806406	0.157874
NFKBIA	-0.434574	0.0803761	0.157621
WWTR1	-0.989677	0.0802863	0.157621
TRIM11	-1.03157	0.0798965	0.157191
CD68	-1.81408	0.0795344	0.156733
ETV6	-1.11496	0.0787986	0.155537
ZCCHC10	-0.809548	0.0787155	0.155537
MRS2	-0.857129	0.0784769	0.15541
PTPRS	-1.48574	0.0784199	0.15541
IMMP1L	-0.656063	0.0782802	0.15541
PTPRK	-0.991635	0.0774	0.154035
HSD3B7	-1.4907	0.077037	0.153565
HILPDA	-0.551239	0.0768942	0.153534
BIRC3	-0.497937	0.0762188	0.152438
CCL20	-0.725868	0.0759511	0.152154
EGLN1	-1.54235	0.0758401	0.152154
ZNF800	-1.42457	0.0758049	0.152154
AASDHPPT	-1.32586	0.0754881	0.151983
SKI	-1.42687	0.0754429	0.151983
CFD	-1.12643	0.0754279	0.151983
NCK1	-0.513084	0.0753677	0.151983
SAMHD1	-0.805643	0.0749874	0.151983
WDR13	-1.20721	0.074574	0.151404
C5orf38	-1.88169	0.0744498	0.151404
TMEM159	-1.01464	0.0744349	0.151404
SNRNP35	-0.540855	0.0740931	0.15119
GBP3	-0.785593	0.0739301	0.151113
PHLDA1	-0.543134	0.0725977	0.148641
RAI14	-0.574022	0.0723743	0.148435
S100P	-0.563147	0.072321	0.148435
MARK2	-1.60912	0.0722919	0.148435
CDH3	-1.24205	0.0721322	0.148435
CHP1	-0.747484	0.0720548	0.148435
LAPTM5	-1.31588	0.071828	0.148435
STK3	-0.772865	0.0716065	0.148372
DPYSL2	-0.74301	0.0711271	0.147631
RTKN	-0.919694	0.0710315	0.147631
BLOC1S2	-0.769515	0.070636	0.147118
THUMPD3	-0.769013	0.0697703	0.145566
CHMP4C	-0.953007	0.0697186	0.145566
PDPK1	-1.34156	0.0695964	0.145566
SMC6	-0.788101	0.0694697	0.145566
HIST1H1C	-0.473553	0.0692308	0.145445
MFAP1	-0.899263	0.0687459	0.144678
RCE1	-1.03482	0.0681713	0.143719
FOSL2	-0.64723	0.0679269	0.143454
DNAJC15	-0.620024	0.0678855	0.143454
COX11	-0.631479	0.0675136	0.143081
C12orf43	-1.72851	0.0672438	0.14276
SLC30A7	-1.39058	0.0671936	0.14276
STEAP3	-1.71386	0.0671479	0.14276
LRRC58	-1.05246	0.0668838	0.14276
AKT1	-1.61379	0.0667612	0.14276
KCNS3	-1.30066	0.0666841	0.14276
IL13RA1	-0.576654	0.0666252	0.14276
CBR4	-1.70954	0.0665255	0.14276
WDFY1	-1.21376	0.0658271	0.141998
COPS7B	-1.00473	0.0643382	0.139035
USP6NL	-1.22146	0.0642678	0.139035
CCL4	-0.878252	0.0641842	0.139035
DYRK2	-1.86317	0.0639955	0.139035
MAGT1	-1.51163	0.0636151	0.138463
HMGCS1	-1.11037	0.0634234	0.138295
CAV2	-1.11788	0.0633756	0.138295
PLAC8	-1.45432	0.0632713	0.138295
FAM96A	-0.673818	0.0629204	0.137945
RBM26	-1.17529	0.0628988	0.137945
NMRK1	-1.18635	0.0627175	0.137945
UBL4A	-0.967058	0.0626658	0.137945
OAT	-0.414003	0.0625625	0.137945
EIF2B5	-0.829627	0.0611392	0.135268
PIAS3	-1.27693	0.060878	0.134937
SCFD1	-0.679951	0.0607183	0.13483
PNPLA2	-0.519361	0.0604753	0.134538
SEMA3C	-1.24977	0.0604251	0.134538
LDLR	-1.22267	0.0602873	0.134538
ANKRD40	-1.47896	0.0602873	0.134538
SETD7	-1.62274	0.0601873	0.134538
SPINK5	-1.42838	0.0599875	0.134538
SOCS1	-2.0867	0.0598257	0.134538
BPHL	-0.735328	0.0597635	0.134538
PABPC4	-1.35046	0.0597014	0.134538
FOXA1	-1.62134	0.0596683	0.134538
SMAD2	-0.572285	0.0596228	0.134538
VAMP5	-1.7273	0.0595609	0.134538
HIPK3	-1.47089	0.0593629	0.134538
ARMT1	-0.904454	0.0590423	0.134538
SOAT1	-1.14901	0.0579842	0.13241
PELI1	-1.09526	0.0578671	0.13241
TMEM120A	-1.56209	0.0578187	0.13241
RABGAP1L	-0.507401	0.0570095	0.131176
COX19	-0.695996	0.0569458	0.131176
MIS18BP1	-0.903943	0.0562609	0.129949
ZFPL1	-1.09908	0.0559073	0.129379
TIMP3	-1.56492	0.0558328	0.129379
SUCLG2	-0.528523	0.0556686	0.129323
CREBZF	-1.5643	0.0556491	0.129323
IGFBP4	-2.23671	0.0551979	0.128724
IGHM	-1.26124	0.0550546	0.128638
IFI44L	-0.637469	0.0547381	0.128147
TMEM127	-1.71039	0.0545958	0.128062
TGFA	-1.17358	0.0543886	0.127824
ATP6V1D	-0.583967	0.0538851	0.126887
SHPRH	-1.26608	0.0535931	0.126446
NMU	-1.3273	0.0533402	0.126096
FBXO22	-1.02438	0.0532875	0.126096
PDCD4	-0.811264	0.0531746	0.126096
YIPF1	-1.57171	0.0528448	0.125662
S100A8	-0.536657	0.0525129	0.125119
ERN1	-2.20107	0.052131	0.124455
GLT8D1	-1.17578	0.0520645	0.124455
IRS1	-1.02119	0.0520313	0.124455
ADGRE5	-2.20421	0.0516743	0.124101
C16orf72	-1.33837	0.0516266	0.124101
ESYT2	-1.18167	0.0515534	0.124101
PYGB	-0.572593	0.0515351	0.124101
EXOC1	-1.14947	0.0510973	0.123698
CDS2	-1.16721	0.0510682	0.123698
FXYD3	-0.508312	0.051021	0.123698
CTSL	-0.637567	0.0505941	0.123221
CCND3	-0.585807	0.0501666	0.122427
SART1	-0.88101	0.0501631	0.122427
TMA16	-0.577872	0.0501023	0.122427
CRKL	-1.51024	0.0495223	0.121591
ALDH2	-0.617772	0.0494869	0.121591
TM2D2	-1.21595	0.049448	0.121591
ANKRD17	-1.69672	0.049342	0.121591
HLA-DMB	-1.31435	0.0485774	0.120249
ATAD1	-0.916173	0.0483202	0.119858
ISCA2	-0.952789	0.0482751	0.119858
NRP1	-1.51719	0.0482439	0.119858
PCYT1A	-1.59581	0.048109	0.119858
EIF2B1	-0.843112	0.0477782	0.119495
H2AFX	-1.00311	0.0477507	0.119495
TWF1	-0.788733	0.0476718	0.119495
GOPC	-0.539693	0.0475382	0.119495
GBP2	-0.642477	0.0474835	0.119495
PDXK	-0.736482	0.0474801	0.119495
AGR3	-2.66181	0.0473947	0.119495
TSPAN12	-1.52278	0.0473367	0.119495
IVL	-1.26802	0.0472652	0.119495
MTIF3	-0.543026	0.0471257	0.119495
CCDC127	-0.927966	0.047068	0.119495
CANT1	-0.713516	0.0470273	0.119495
TTLL4	-1.21185	0.0468209	0.119495
PHC2	-1.64169	0.0468175	0.119495
MYB	-1.2578	0.0466927	0.119495
UCK2	-0.878491	0.0464506	0.119495
PPIC	-0.544683	0.0461928	0.119488
MFSD14B	-2.05176	0.0460261	0.119312
FBXW5	-0.827261	0.0459396	0.119312
IGBP1	-0.68827	0.0457703	0.119312
SNAP29	-0.630954	0.0454366	0.118804
ACACA	-2.00139	0.0453774	0.118804
PRELID3B	-0.52135	0.0453741	0.118804
ANKRD28	-1.48445	0.0453314	0.118804
BCL3	-1.67423	0.0447202	0.117952
FAM91A1	-1.47497	0.0446942	0.117952
C1QA	-1.07234	0.0445709	0.117952
STOM	-1.58376	0.0445417	0.117952
CCDC90B	-0.63654	0.044477	0.117952
MACROD1	-1.00789	0.0442639	0.117952
FAM83A	-1.10581	0.0440421	0.117705
RHOT1	-0.680298	0.043579	0.116726
SLC12A2	-2.04266	0.043202	0.115973
CTDSP1	-0.942116	0.0431137	0.115973
CCDC14	-1.06741	0.0430539	0.115973
SPPL3	-1.20443	0.0429501	0.115973
STK16	-1.00685	0.0427558	0.115805
FASN	-1.06755	0.042712	0.115805
SLC20A1	-0.903478	0.0424843	0.115588
MOSPD3	-1.31675	0.0424781	0.115588
PRCC	-0.603047	0.0421185	0.115111
NINJ2	-1.5063	0.0420968	0.115111
APTX	-0.738952	0.0415289	0.114016
SLC31A1	-1.99484	0.04117	0.113288
CKAP4	-1.18755	0.0411094	0.113288
RAPH1	-1.04806	0.0409794	0.11328
SPPL2A	-0.838228	0.040478	0.11215
TSPAN15	-1.44323	0.0403557	0.112068
GLMP	-0.956293	0.0399877	0.111302
VLDLR	-2.00936	0.0399109	0.111302
GLRX	-0.923148	0.0396783	0.110952
DCBLD2	-0.908226	0.0396137	0.110952
STARD10	-1.37942	0.0392224	0.110187
MBIP	-1.12398	0.0392136	0.110187
TRAF7	-0.729181	0.0390656	0.110187
ARL16	-0.749625	0.0389122	0.110084
HYI	-0.826192	0.0385411	0.10929
BOLA1	-0.702445	0.0384238	0.109214
MLPH	-1.45566	0.0380283	0.108345
LTF	-1.69171	0.0378333	0.108044
IGHG4	-1.33918	0.0369785	0.105853
SCO2	-1.33721	0.0367468	0.10544
CCNDBP1	-0.911594	0.0363306	0.104494
SLC40A1	-1.4318	0.0361349	0.104179
CAPN8	-1.68785	0.0359293	0.103834
AIMP2	-0.842761	0.0359185	0.103834
HIST1H2AC	-0.812325	0.0359185	0.103834
DEDD2	-1.09026	0.035521	0.103396
ZC3HAV1	-0.998812	0.0350744	0.102343
TMEM181	-2.60002	0.0350453	0.102343
TMEM256	-0.620404	0.0349265	0.102343
HLA-DQB1	-0.903401	0.0344264	0.101185
GOT2	-1.50416	0.0344082	0.101185
METTL2A	-1.03647	0.0343666	0.101185
ADPGK	-1.1755	0.0342913	0.101185
IGLC2	-0.496841	0.034167	0.101185
GTF3C3	-1.20288	0.0340947	0.101185
CKLF	-0.545587	0.0338605	0.100996
TTC17	-1.65412	0.0334521	0.100025
ADNP	-0.874514	0.0334242	0.100025
HOPX	-0.890518	0.0332596	0.0999442
MAP2K3	-1.06549	0.0332444	0.0999442
FAM129B	-1.43685	0.0328724	0.0992746
SPG7	-1.34424	0.0328499	0.0992746
PHKG2	-1.85954	0.0328374	0.0992746
BRWD1	-1.55498	0.0328049	0.0992746
SLC25A39	-0.574472	0.0326852	0.0992746
RNASEH2C	-0.423394	0.0325833	0.0992746
UBXN7	-1.20049	0.0315523	0.0967391
TSSC4	-0.695185	0.0314534	0.0966812
TRIP6	-1.58762	0.031451	0.0966812
PLEC	-1.12296	0.0313548	0.0966812
APOE	-0.969254	0.0313164	0.0966812
WSB2	-1.12003	0.0312732	0.0966812
SRD5A3	-0.750259	0.03107	0.0966812
OGFOD3	-1.37646	0.0307095	0.0958582
PSME4	-1.32089	0.0305894	0.0957305
HARS	-0.941464	0.0305706	0.0957305
NSF	-1.11566	0.0305541	0.0957305
TCEAL4	-0.466981	0.030472	0.0957305
CXCL16	-0.887424	0.0300294	0.0949621
YDJC	-0.964957	0.0300225	0.0949621
NOTCH3	-1.61311	0.0298217	0.0948016
LIMCH1	-0.778747	0.0296312	0.0944446
RPRD2	-1.26829	0.0296244	0.0944446
PARD6B	-2.34475	0.0294896	0.0944446
FBXO6	-0.90062	0.02946	0.0944446
TMCO3	-1.66304	0.0293986	0.0944446
TNFRSF14	-1.06471	0.0290796	0.0939256
ZBTB44	-1.66801	0.0289627	0.0937988
EDEM2	-1.65925	0.0288843	0.0937962
CEACAM6	-1.84243	0.028882	0.0937962
TMC6	-1.12353	0.0285901	0.0933427
TMEM248	-1.50941	0.0283381	0.0927706
PMEPA1	-0.792351	0.0281886	0.0925323
TOR1A	-1.2675	0.0278008	0.0915077
C1R	-1.15678	0.0277402	0.0915077
RREB1	-2.21955	0.0275892	0.0913088
ITGA2	-1.81695	0.0269923	0.0895788
SMARCA2	-1.66725	0.0269648	0.0895788
TIMP1	-0.605176	0.0269206	0.0895788
PIK3IP1	-2.78121	0.0267818	0.0895788
C2orf68	-1.62309	0.026765	0.0895788
HIST2H2BE	-0.994469	0.0267588	0.0895788
SURF2	-0.98743	0.0267315	0.0895788
ISG20	-0.5786	0.0262248	0.0887382
PEX26	-2.38108	0.0261137	0.0886107
TGIF1	-0.673869	0.02604	0.0886092
DCAF11	-1.15376	0.0256616	0.0875683
RDH10	-1.91699	0.0255748	0.0875194
KIAA0100	-2.0208	0.0255345	0.0875194
CAMK1D	-1.16002	0.0253579	0.0872717
FIS1	-0.547598	0.0250712	0.0865315
CEACAM1	-1.52416	0.024514	0.0848508
SDR16C5	-0.928128	0.0245004	0.0848508
TMEM189	-1.1599	0.0244616	0.0848508
TMED3	-0.620651	0.0240707	0.0840386
VCAN	-1.91402	0.0236851	0.0829323
LRPAP1	-0.790133	0.0236757	0.0829323
EPAS1	-1.65114	0.0234317	0.0825234
KLF5	-2.66627	0.0234187	0.0825234
IGFBP3	-1.38769	0.0233757	0.0825234
SRGN	-1.07673	0.0233608	0.0825234
SDF2L1	-0.564158	0.0232678	0.0825234
RGS1	-2.33248	0.0232604	0.0825234
ITGB4	-1.4718	0.0230938	0.0825234
GALNT2	-1.14027	0.023057	0.0825234
SNHG25	-1.29975	0.0230238	0.0825234
DCAF12	-0.670188	0.0229889	0.0825234
PYM1	-0.909951	0.0229063	0.0825234
MPDU1	-1.01274	0.0228734	0.0825234
XPR1	-1.73637	0.0228167	0.0825234
SYCP2	-1.78554	0.0227347	0.0825234
GJA1	-2.27309	0.0226457	0.0825234
TAP2	-0.875017	0.0224415	0.0825234
LARP4B	-1.60329	0.0222997	0.0823795
TGFBR2	-2.81954	0.0222533	0.0823795
DEFB1	-0.740258	0.022061	0.0819992
C1orf198	-1.04569	0.0219902	0.0819883
TRPS1	-2.53127	0.0218263	0.0816291
GLS	-2.59029	0.0218176	0.0816291
ETNK1	-0.786095	0.0217772	0.0816291
XRN1	-1.19053	0.0216008	0.0815429
VASP	-0.632476	0.021526	0.0815155
ECE1	-0.808748	0.0215208	0.0815155
TRAPPC4	-0.904428	0.0212516	0.0809841
TFAP2C	-1.4553	0.0211284	0.0807692
RABL6	-2.66051	0.0208179	0.0798349
IFT27	-1.06963	0.0205714	0.0791408
SFTA2	-1.11019	0.0204565	0.0789505
NFATC3	-1.2976	0.0204167	0.0789505
BTN3A2	-2.37663	0.0203902	0.0789505
IGHG1	-0.912366	0.0203671	0.0789505
GALNT1	-2.06457	0.0200974	0.0785686
TOP2B	-1.16481	0.0199216	0.0781339
RPS4Y1	-1.28352	0.0198406	0.0780698
MED15	-1.2141	0.0196811	0.0776954
DPF2	-1.20419	0.0192803	0.0763625
MAP1LC3B	-0.569144	0.019274	0.0763625
SEMA3B	-1.6956	0.0187446	0.0747309
DUSP6	-1.37141	0.0186173	0.0744692
MTA3	-1.00553	0.0182685	0.0733169
KIAA0319L	-2.61963	0.018162	0.0731324
YPEL2	-1.41749	0.0175518	0.0709116
AREG	-1.10031	0.0174302	0.0708945
TMEM223	-0.970177	0.0174259	0.0708945
CKS2	-0.615638	0.0173294	0.0708945
NSUN6	-1.922	0.0172492	0.0708741
BCL2L1	-1.01259	0.0170996	0.0704993
PAEP	-1.19872	0.0169385	0.0700742
LAMP1	-1.18502	0.0169117	0.0700742
MPZL2	-1.30046	0.0162923	0.0678658
GPR108	-1.04651	0.0162176	0.0677885
SLFN5	-1.6376	0.0161865	0.0677885
TFRC	-1.67256	0.0161244	0.0677885
MIIP	-1.13977	0.0160343	0.0677253
SFTA3	-1.91938	0.0157879	0.0669183
C5orf51	-1.57272	0.0153953	0.0654842
JOSD2	-1.11878	0.0153165	0.0653794
CDC42SE1	-0.638036	0.0150253	0.0643636
HYOU1	-2.6895	0.0148765	0.0639529
REXO2	-0.819337	0.0146185	0.0630685
ARMCX3	-1.44715	0.014461	0.0626126
HERC4	-1.71167	0.0143926	0.0625405
ID3	-1.59427	0.0142203	0.062015
PCF11	-2.08597	0.0141553	0.0619551
C1QB	-1.74455	0.0140082	0.0615341
PBRM1	-1.14651	0.0139535	0.0615176
SOCS3	-0.965933	0.0138813	0.0614233
LRIG3	-3.58112	0.0136981	0.0608356
WEE1	-1.39315	0.0136293	0.0607537
C15orf61	-1.09677	0.0135748	0.0607347
CCDC57	-2.39209	0.0135112	0.060675
LSM1	-0.65167	0.0134893	0.060675
BORCS8	-2.37527	0.013479	0.060675
BCKDK	-1.08827	0.0134009	0.060675
CFAP20	-1.02988	0.0133392	0.060675
FLYWCH2	-0.792716	0.0132653	0.060675
ALOX5AP	-1.97745	0.0126932	0.0583019
COL1A1	-1.77918	0.0126681	0.0583019
ZDHHC12	-0.950683	0.0125791	0.0582204
KIT	-2.30106	0.0119793	0.0556577
POR	-1.72254	0.0119431	0.0556577
WDR70	-0.89421	0.0119317	0.0556577
IRF2BPL	-2.16627	0.0118155	0.0555373
IGHA1	-0.668855	0.0116576	0.0550095
FAM84B	-1.57758	0.0115739	0.0548285
CYP20A1	-1.15735	0.0115418	0.0548285
SYNC	-2.38267	0.0114777	0.0548027
C15orf48	-0.861963	0.0113298	0.0543113
DIAPH1	-2.01853	0.0113042	0.0543113
PPP3CA	-1.46464	0.011258	0.0543113
SLC16A3	-1.01753	0.0111758	0.0542185
TMEM101	-0.900675	0.0111671	0.0542185
AGR2	-1.18575	0.0111466	0.0542185
TMED5	-1.88164	0.0110932	0.0542185
SUPT6H	-1.61469	0.0110122	0.0542185
ATF7	-1.76664	0.0108127	0.0535316
TMEM33	-1.19744	0.0105987	0.0526884
STK17B	-2.16768	0.0100901	0.0503669
P2RX4	-1.39152	0.0100883	0.0503669
PRSS23	-1.87992	0.00994062	0.0500344
PVR	-1.36404	0.00987493	0.0499118
SMAGP	-1.31853	0.00980008	0.0497416
GADD45G	-1.40026	0.00977928	0.0497416
DDX23	-1.75276	0.00977063	0.0497416
ID2	-0.840833	0.00960069	0.0493516
TLK1	-1.02481	0.00957177	0.0493516
GDF15	-3.07869	0.00954039	0.0493516
NUP155	-1.07943	0.00929181	0.0483815
IRF1	-0.948187	0.00907168	0.0474398
CHMP1B	-0.719859	0.00903531	0.0474398
IER5	-1.7268	0.00891821	0.0470445
GFER	-0.992177	0.00891263	0.0470445
GPCPD1	-2.37101	0.00887842	0.0470445
ADIPOR1	-0.743417	0.00885542	0.0470445
PPP4R3A	-2.56626	0.00883326	0.0470445
SNAPC5	-1.4684	0.00880089	0.0470445
CDC27	-1.15811	0.00871459	0.0470445
TAOK3	-1.53784	0.00868107	0.0470445
INTS3	-1.98431	0.00858656	0.0469347
MRPL32	-1.08599	0.0085481	0.0469347
C9orf3	-1.02205	0.00852739	0.0469347
OTUD7B	-2.24637	0.00839653	0.0465276
SLC25A1	-0.876864	0.00834379	0.0464484
PPP2R5E	-1.38112	0.00812404	0.0454344
CBY1	-1.38412	0.00811817	0.0454344
MED13L	-2.25242	0.00800887	0.0452089
RNASE1	-1.46826	0.00796192	0.0451549
CYR61	-1.86204	0.00784099	0.0446788
PMAIP1	-1.12607	0.00745603	0.0426867
TMEM245	-1.97363	0.00741132	0.0426327
HES1	-0.878427	0.0073931	0.0426327
CRELD2	-1.22078	0.00722495	0.0419603
ERGIC1	-0.932669	0.0071782	0.0418902
HSPA6	-1.48664	0.00715329	0.0418902
EIF3B	-1.29442	0.00702217	0.0413795
MSRB1	-1.09702	0.0069536	0.0411762
TIMP2	-2.67096	0.00691033	0.0411216
PTPMT1	-1.40012	0.00687804	0.0411216
DGCR2	-2.51497	0.00679509	0.0408382
DVL1	-2.24338	0.00677076	0.0408382
BCL7A	-2.16029	0.00674836	0.0408382
HSPH1	-0.959601	0.00663923	0.040506
S100A4	-1.02137	0.00647281	0.0396911
MAFB	-2.17587	0.00644773	0.0396911
SPTBN1	-1.59916	0.00643939	0.0396911
ABCA7	-1.59873	0.00642927	0.0396911
CRIP1	-1.08627	0.00628681	0.0393496
RAB5B	-1.67046	0.00610222	0.0383932
ITGB6	-1.49746	0.00596909	0.0377521
HNRNPH1	-0.727825	0.00580866	0.0369309
DTX3L	-1.68756	0.00578591	0.0369309
SKIL	-0.877199	0.00575893	0.0369309
JUND	-1.11353	0.00574978	0.0369309
ASCC3	-1.32399	0.00564948	0.0366913
USP48	-1.47889	0.00558211	0.0364496
TMEM97	-1.10349	0.00535144	0.0351334
R3HDM2	-1.49663	0.00532128	0.0351263
MAPK1IP1L	-1.31703	0.00530226	0.0351263
PDZK1IP1	-1.13601	0.00518842	0.0346277
PTGS2	-2.67946	0.00518059	0.0346277
ADAM9	-2.28245	0.00504517	0.0340479
LSR	-0.798206	0.00498009	0.0337974
ZFP36L2	-1.11505	0.00494572	0.0337538
NBL1	-2.91711	0.00484666	0.0332657
AP3D1	-1.92182	0.00482734	0.0332657
CTSS	-1.42779	0.00480123	0.0332657
STX6	-1.58266	0.00479028	0.0332657
SNX17	-1.19942	0.00478117	0.0332657
IFITM2	-0.925398	0.00474804	0.0332657
EAPP	-1.20593	0.00466948	0.0331808
SGK1	-2.20488	0.00460528	0.0329182
CXCR4	-0.853631	0.00458114	0.0329182
HLA-F	-1.65162	0.00457501	0.0329182
PRKCI	-1.23031	0.00434511	0.0316198
PDIA4	-0.796816	0.00425866	0.0313687
PABPN1	-1.21896	0.00416132	0.0310301
IFI27L2	-1.04934	0.00414369	0.0310301
APOC1	-1.38441	0.00411301	0.0310301
ARL6IP1	-0.785451	0.00409477	0.0310301
TINAGL1	-1.27457	0.00407701	0.0310301
FLNA	-0.991333	0.00403466	0.0310301
CD52	-1.65228	0.00395422	0.0306199
TYROBP	-2.01081	0.00390204	0.0304108
MED13	-2.60344	0.0038322	0.0300604
CXCL10	-1.7636	0.00377119	0.0297752
DPM2	-1.31146	0.00363155	0.0288613
ARHGDIB	-1.17126	0.00359027	0.0287222
LRP10	-1.50882	0.00357765	0.0287222
TM4SF1	-0.856802	0.00353936	0.0286949
ICAM1	-1.44458	0.00348568	0.0284507
ITFG1	-1.70275	0.00341862	0.0280932
CD7	-2.11264	0.00336827	0.027869
TMEM141	-1.03964	0.00323559	0.0269558
XIAP	-2.43152	0.00316885	0.0265832
IFITM1	-1.50026	0.00316385	0.0265832
HLA-DMA	-0.920812	0.00313394	0.0265832
CD55	-0.977133	0.00306001	0.0262163
SLC5A3	-1.74787	0.00299718	0.0258614
STX16	-1.5815	0.00291167	0.0253043
TRIM38	-1.39863	0.0028219	0.0247018
WDR60	-1.89917	0.00267126	0.0235538
TNFAIP2	-1.24819	0.00261182	0.0231992
SPCS3	-1.25887	0.00249834	0.0223555
CYBA	-0.847446	0.00246028	0.0221793
FN1	-1.67176	0.00243824	0.0221459
FBP1	-1.92654	0.00237779	0.0217604
TRA2A	-1.55389	0.00231189	0.0213188
SLPI	-0.962689	0.00226558	0.0210525
UBE2Z	-1.98156	0.0022472	0.0210436
SQLE	-1.20586	0.0021578	0.0205246
FOXP1	-1.38967	0.00214023	0.020519
CTHRC1	-1.41411	0.00209666	0.0202621
ERRFI1	-1.27642	0.001954	0.0190357
TACSTD2	-1.07898	0.001926	0.0189156
LCN2	-1.71606	0.00186204	0.0184373
NAPSA	-2.40001	0.00183773	0.018347
GPRC5A	-1.81646	0.00176324	0.01775
NSRP1	-1.01115	0.00172104	0.0174707
CTSB	-0.905368	0.00167801	0.0171783
INSR	-2.15415	0.00165264	0.0170631
DGCR6L	-0.949052	0.00161018	0.016768
CEBPB	-1.14445	0.00159591	0.016764
B4GALT1	-1.28578	0.00154002	0.0163188
TFPI	-1.48735	0.00153727	0.0163188
THUMPD3-AS1	-2.2609	0.00151705	0.0163188
AQP3	-1.78533	0.00151657	0.0163188
SLC34A2	-2.9653	0.00146757	0.0161166
STK4	-2.23375	0.00146109	0.0161166
SYNGR2	-1.14424	0.00144088	0.0161165
ATF7IP	-2.16865	0.00143906	0.0161165
CMTM6	-1.05105	0.00140064	0.0159621
MBNL1	-1.70709	0.00139813	0.0159621
NFKBIZ	-2.64188	0.0013859	0.0159621
IFNGR1	-1.78583	0.00137756	0.0159621
PEX13	-1.57605	0.00133924	0.0158608
SAA1	-1.80699	0.00132763	0.0158608
RBM6	-2.29114	0.00132523	0.0158608
SMG7	-2.22127	0.00129555	0.0158084
BTG2	-1.13685	0.00127788	0.0157518
CDH1	-1.55132	0.00121003	0.0150692
EMP2	-1.08856	0.00114097	0.0143572
RPN1	-1.24396	0.00111153	0.014134
IER3	-1.1242	0.00108572	0.0139526
ITGA3	-2.03767	0.00105452	0.0136974
ERBB2	-1.57694	0.00104453	0.0136974
APLP2	-1.22663	0.00101839	0.0135189
CD81	-1.88377	0.000985984	0.0132341
SNHG19	-2.13754	0.000794645	0.0107857
MKNK2	-1.98043	0.000793856	0.0107857
PTP4A2	-1.20562	0.000783405	0.0107857
CLIP1	-1.89881	0.000735728	0.0103344
SERTAD1	-1.48454	0.00071335	0.010138
SLC38A10	-2.5796	0.000705849	0.010138
ST14	-1.97615	0.000690912	0.0100557
PCMTD1	-1.91388	0.000682792	0.0100557
IGLC3	-1.19936	0.000672128	0.0100238
CALU	-1.1868	0.000650754	0.00982638
STAT2	-2.05088	0.000612982	0.0093732
RND3	-1.13149	0.000586582	0.0090845
RNF149	-1.70257	0.000577259	0.00905622
PRSS8	-1.37469	0.000566471	0.00900391
SDC1	-1.90304	0.000525648	0.00846644
SLC12A7	-2.48362	0.00051342	0.00838124
SETD5	-2.05468	0.000449973	0.00744613
ZCCHC11	-1.89953	0.000437329	0.00741034
XIST	-2.61251	0.000403129	0.00695685
UGCG	-2.18751	0.000397202	0.00695392
SPINK1	-2.35893	0.000359781	0.0063914
SUMF2	-1.47087	0.000348384	0.0062813
TOR1AIP2	-1.32467	0.000337798	0.00618273
CD74	-1.1033	0.000329787	0.00612897
SLC44A1	-1.75593	0.000328591	0.00612897
LAMB3	-1.51898	0.000300867	0.00576901
GCHFR	-1.71541	0.000265717	0.00517719
MARCKS	-1.23078	0.00025549	0.00505954
RNASET2	-1.17682	0.000246897	0.00497086
VEGFA	-1.83647	0.00024038	0.00492167
C6orf62	-1.67874	0.000224381	0.00467331
SMPDL3A	-1.59052	0.000217349	0.00460628
CSNK1E	-3.26921	0.000214414	0.00460628
WTAP	-1.23785	0.000213898	0.00460628
PARP14	-1.38388	0.000205632	0.00460006
IGHG3	-1.81852	0.000198457	0.00452331
PCBP2	-1.12377	0.000177148	0.00411529
SDCCAG8	-1.52913	0.000176116	0.00411529
C1orf56	-2.20066	0.000173284	0.00411529
HERPUD1	-1.814	0.000171895	0.00411529
CTSH	-1.64049	0.000150489	0.00378731
ASPH	-1.60807	0.000134095	0.00344654
MUC1	-1.76878	0.000129604	0.0034035
EGR1	-1.42024	0.000109043	0.00292721
HIST1H2BG	-1.8857	0.000102439	0.0028124
CPD	-2.26698	0.000100474	0.0028124
KRTCAP3	-1.40713	9.89178e-05	0.0028124
CTNNB1	-1.23302	9.77287e-05	0.0028124
NPC2	-1.19879	9.44683e-05	0.0028124
SAT1	-1.1358	9.26132e-05	0.0028124
QSOX1	-1.56539	8.46129e-05	0.0026898
TMCO1	-1.15926	8.42375e-05	0.0026898
MACF1	-2.70414	8.05178e-05	0.0026898
ZFP36L1	-1.23821	7.67085e-05	0.00264754
DUSP1	-1.56312	6.92119e-05	0.00245906
MIDN	-1.88375	5.93504e-05	0.00217259
WSB1	-1.40502	5.37253e-05	0.00202813
TSC22D3	-1.50196	5.3495e-05	0.00202813
TXNIP	-1.38145	4.92414e-05	0.00199605
PNISR	-1.31328	4.09736e-05	0.00176772
HLA-DRB1	-1.22439	3.79781e-05	0.00169917
MDM4	-2.7482	3.75775e-05	0.00169917
PTK7	-2.09774	3.43856e-05	0.00166151
BRD2	-1.41034	3.35258e-05	0.00166151
SPTSSA	-1.77074	3.2704e-05	0.00166151
SFTPB	-2.34722	3.09719e-05	0.00166151
ZFP36	-1.47794	2.90529e-05	0.00166151
BCAM	-1.57018	1.50773e-05	0.000910667
TOB1	-2.01947	1.15177e-05	0.000732283
AGRN	-2.26022	7.13928e-06	0.000479125
RPS28	-1.25805	6.13156e-06	0.000435702
HLA-A	-1.40785	5.80235e-06	0.000435702
KLF6	-1.51677	5.32846e-06	0.000429118
SDC4	-1.74704	4.64288e-06	0.000400614
RHOB	-1.75321	1.40389e-06	0.000130454
JUN	-1.46312	1.21793e-06	0.000122605
SLC25A37	-2.24694	2.98705e-07	3.28032e-05
RPL41	-1.75284	2.84066e-08	3.8128e-06
HSPA1B	-1.77511	2.0128e-08	3.03933e-06
HSPA1A	-1.88012	2.88937e-09	4.98622e-07
WFDC2	-1.76079	1.31495e-09	2.64743e-07
MT-ND3	-2.25997	2.14353e-12	6.47346e-10
MT-ATP6	-2.22259	7.12467e-15	2.86887e-12

## Sheet: 5.DEGAS Differential Genes
Gene	logfoldchanges	pvals	pvals_adj
SPP1	2.06917	2.41847e-11	8.11532e-10
S100A16	1.01646	2.87617e-07	4.13621e-06
S100P	1.0879	1.7638e-06	1.74645e-05
IGFBP3	1.34408	7.34812e-06	5.44573e-05
ANGPTL4	0.922768	0.000348649	0.00131615
PAEP	0.698511	0.00168486	0.00476654
CCL20	0.765034	0.00280892	0.00736046
F3	1.15842	0.00284591	0.00744008
SFTA2	0.635442	0.00378944	0.00949718
C15orf48	0.562964	0.0079874	0.0169873
PDZK1IP1	0.610977	0.0157581	0.0294672
FAM83A	0.630135	0.0247631	0.042673
MUC1	0.665326	0.0342601	0.0558612
SNCG	0.606019	0.0353157	0.0571868
ERRFI1	0.533944	0.0354241	0.0572089
TIMP1	0.495738	0.0709816	0.104824
SEMA3B	0.604674	0.072069	0.1063
SPINK1	0.460598	0.0867002	0.123601
CDA	0.559881	0.086766	0.123601
ERO1A	0.597579	0.0948377	0.133323
ASPH	0.482287	0.101929	0.141984
IGHG4	0.467504	0.103025	0.143215
TREM1	0.646538	0.108784	0.150013
GPX4	-0.110879	0.11762	0.161094
ABCA7	0.407044	0.12308	0.167057
AREG	0.451723	0.128539	0.17272
IGFBP4	0.64441	0.145906	0.192418
UBE2C	0.270225	0.148937	0.19556
TMEM141	0.506842	0.17096	0.219003
CST6	0.507403	0.199713	0.250263
C1QB	0.435173	0.20812	0.258651
TFPI	0.312641	0.213811	0.264906
TIMP2	0.499494	0.217104	0.267887
UPP1	0.465493	0.228692	0.279615
CRIP1	0.359999	0.231515	0.281926
GPRC5A	0.329784	0.243022	0.292401
ITGA2	0.527329	0.247608	0.296443
PRSS23	0.432317	0.248843	0.297038
C19orf33	0.322101	0.256263	0.304109
BIRC3	0.406427	0.261369	0.30924
LCN2	0.425406	0.283234	0.332828
PLS3	0.378246	0.31271	0.365332
C1QA	0.276764	0.318755	0.370246
CSTB	-0.153616	0.324257	0.375914
MPZL2	0.321979	0.329255	0.381342
PHACTR3	0.311142	0.344267	0.396827
CAV2	0.512491	0.359674	0.412618
GJA1	0.368138	0.365238	0.418207
IRS1	0.262103	0.367352	0.420229
SRGN	0.316459	0.375141	0.428327
TNNC2	0.198741	0.376665	0.429661
SPTSSA	0.267322	0.379982	0.432305
VEGFA	0.332036	0.390419	0.443033
STEAP1	0.313025	0.392423	0.444697
TACSTD2	0.193892	0.393971	0.446033
PTGS2	0.24728	0.399683	0.452076
RCN3	0.336915	0.403688	0.455752
IVL	0.340046	0.412293	0.463734
LAMC2	0.651749	0.414218	0.465466
FAM129B	0.452061	0.432838	0.483242
SPRR2D	0.260856	0.452138	0.50293
LYZ	0.163093	0.455504	0.505279
TIMP3	0.224473	0.481004	0.528765
SLC2A1	0.347917	0.481163	0.528765
PLAU	0.337336	0.488507	0.535011
SLC16A3	0.264886	0.510429	0.557503
EDN1	0.366145	0.527956	0.575086
RHOF	0.449921	0.537944	0.585439
CTSL	0.447951	0.549208	0.597158
HOPX	0.121088	0.584873	0.629702
STOM	0.212135	0.593291	0.638198
FBXW5	0.44365	0.613578	0.657325
PVR	0.242894	0.613794	0.657325
RPS4Y1	0.0932775	0.642877	0.685433
CAPN8	0.197944	0.647961	0.689636
CD68	0.318691	0.655101	0.696622
ESYT2	0.305856	0.665141	0.705435
ITGB4	0.254743	0.666391	0.706141
TGFBI	0.332554	0.67974	0.719654
ICAM3	0.33312	0.680401	0.719724
MLPH	0.189313	0.684262	0.723174
ETS2	0.513346	0.692021	0.730735
CCDC57	0.255509	0.702854	0.739801
TOP2A	0.234953	0.740104	0.774065
KRT17	0.326049	0.759615	0.792413
PLEC	0.343283	0.761184	0.793365
TYROBP	0.0489912	0.782835	0.81341
CPM	0.15776	0.796707	0.826549
DCBLD2	0.215541	0.807266	0.835648
SFTA3	0.0246476	0.807978	0.835648
DUSP6	0.0340113	0.816365	0.841795
AGR2	0.0644652	0.825887	0.849572
OPN3	0.427601	0.828261	0.850076
TM4SF1	0.0933465	0.834065	0.85458
SNHG25	0.141707	0.836498	0.856347
EPAS1	0.131373	0.868611	0.886218
GCHFR	0.11359	0.888094	0.901527
TGFBR2	0.060714	0.939126	0.947756
WFDC3	-0.0139125	0.943041	0.950913
ALOX5AP	0.0196846	0.966344	0.971976
C5orf38	0.0302157	0.976825	0.980071
ADAM9	0.226522	0.984309	0.98676
AGR3	-0.110535	0.994321	0.994797
NOTCH3	0.225277	0.994797	0.994797
GDF15	-0.0777629	0.991916	0.993561
KCNK1	0.0725503	0.969873	0.973904
HSD3B7	0.20735	0.967715	0.972545
NRP1	0.0192164	0.948151	0.954472
TSPAN15	0.0602958	0.947487	0.954472
NAPSA	-0.0454954	0.931881	0.941231
SAT1	0.0801861	0.929959	0.940075
FCER1G	0.0565715	0.91949	0.930271
CCL18	-0.00790559	0.916868	0.928396
SLC40A1	0.0640973	0.891741	0.90371
ANKRD28	-0.0320575	0.890274	0.902981
CLIC3	-0.00482019	0.887152	0.901329
CTBP1	0.127019	0.877853	0.892632
PLAC8	-0.13382	0.873773	0.889231
CD7	-0.0365871	0.87325	0.889231
TP53TG1	-1.99973e-05	0.869763	0.886645
PRR34-AS1	0.00899917	0.865355	0.883642
ELK3	0.0496531	0.864846	0.883642
MBIP	-0.0239434	0.85249	0.87198
TGFA	-0.0618329	0.831952	0.853139
NBL1	-0.00235373	0.828102	0.850076
ITGA3	0.0337484	0.826364	0.849572
IGHG1	-0.0595601	0.820348	0.844825
SPSB2	0.0756907	0.816709	0.841795
TP53I3	0.0160159	0.81133	0.837681
PHC2	0.0796729	0.809469	0.836474
TMEM127	0.121252	0.807701	0.835648
CFD	-0.0218023	0.797127	0.826549
RNASE1	-0.0878315	0.78311	0.81341
MGLL	0.0095359	0.773942	0.805273
TMC6	-0.0178012	0.763676	0.795276
AQP3	-0.0382367	0.759576	0.792413
KLF5	-0.0245234	0.758293	0.792403
CDK1	0.106504	0.739281	0.773875
CRTAP	0.0581627	0.727666	0.762376
NDRG1	0.020347	0.722697	0.757828
RRAS	-0.0894423	0.717588	0.753124
PLP2	0.156721	0.710296	0.74612
ID1	-0.0015802	0.71003	0.74612
STARD10	0.0320643	0.703056	0.739801
ADGRE5	-0.067957	0.698564	0.736357
SFTPB	-0.122839	0.695541	0.733811
RHOB	0.0196244	0.664646	0.705435
ERN1	-0.141018	0.660138	0.701361
FBXO2	0.0583644	0.644061	0.68609
PXN	-0.0740554	0.640512	0.683514
YKT6	0.0544089	0.627822	0.670565
NUF2	0.0458815	0.627158	0.670449
P4HA1	0.0353371	0.625131	0.668873
GALNT1	-0.0979042	0.613268	0.657325
CAB39	-0.0910399	0.60841	0.653297
BCL3	-0.216547	0.60459	0.649773
SLC5A3	-0.0293175	0.584627	0.629702
TM2D2	-0.0796684	0.582219	0.627965
HYOU1	-0.251898	0.572807	0.618366
SETD7	-0.0966102	0.569382	0.615218
LAMB3	0.102953	0.568077	0.614357
MYO1C	-0.00528898	0.567281	0.614046
IER5	-0.117734	0.562044	0.608923
INTS1	0.00443569	0.55999	0.607242
C7orf49	0.12085	0.557951	0.605575
CPD	0.000989824	0.552175	0.599845
TRIM47	-0.0380352	0.523301	0.570531
PPP2CB	-0.000113737	0.522803	0.570502
DGCR2	-0.00206483	0.491988	0.537847
LARP1B	-0.165312	0.491237	0.537513
SH3GL1	-0.305273	0.483328	0.529818
AKT1	-0.257585	0.482425	0.529309
RNF149	-0.0427601	0.481491	0.528765
ADM	0.130779	0.474309	0.522302
ANKRD37	-0.00986329	0.471307	0.519469
CXCL10	-0.0521964	0.470207	0.51873
SLC38A10	-0.0786654	0.466989	0.515651
ZFYVE21	-0.0527272	0.462206	0.510836
AASDHPPT	-0.259365	0.462009	0.510836
CANT1	-0.114155	0.458915	0.508129
MB	-0.0458945	0.456255	0.505648
CCNB2	0.0105285	0.453993	0.504066
XPR1	-0.171041	0.452814	0.503219
LAPTM5	-0.354506	0.447492	0.498221
BAIAP2L1	-0.0121509	0.44621	0.497252
PHF1	-0.0175244	0.437437	0.487926
FAM3A	-0.00649501	0.426076	0.476134
EMP3	-0.256007	0.424998	0.475369
SCO2	-0.221457	0.418769	0.468835
ACP5	-0.232007	0.417096	0.467395
LGALS1	-0.100846	0.416852	0.467395
S100A2	-0.106605	0.416705	0.467395
GZMB	-0.307036	0.411478	0.463249
SFN	-0.0351886	0.404522	0.455842
LAMP1	-0.0797107	0.404388	0.455842
PELI1	-0.265123	0.401238	0.45341
RAPH1	-0.178158	0.390588	0.443033
DESI1	-0.156347	0.384015	0.436397
C11orf1	-0.247985	0.380056	0.432305
PEX26	0.00135509	0.377189	0.429853
MED15	-0.0798143	0.374811	0.428327
SRD5A3	-0.0825161	0.363006	0.416045
CEACAM6	-0.300826	0.350716	0.402724
AP3D1	-0.0769677	0.347657	0.399591
STARD3NL	-0.353347	0.347308	0.399569
GNLY	-0.155724	0.345668	0.398062
GPCPD1	-0.205141	0.343252	0.396035
GEMIN7	-0.147698	0.333033	0.384612
DVL3	-0.236968	0.330438	0.38198
SLC9A3R1	-0.461442	0.329964	0.381798
NMRK1	-0.118741	0.319483	0.370735
RPUSD3	-0.260069	0.317558	0.369211
MAEA	-0.178423	0.316882	0.36878
TMEM63B	-0.293185	0.316808	0.36878
RGS1	-0.417964	0.314755	0.367011
SLPI	-0.0665971	0.313739	0.366181
STK17B	-0.245027	0.312237	0.365132
ST14	-0.0924636	0.306507	0.35878
ACOX1	-0.476933	0.297756	0.348874
CDV3	-0.331778	0.296462	0.347695
AP1G1	-0.412604	0.292252	0.343091
CARD16	-0.215545	0.278766	0.327896
PRR7	-0.315714	0.277484	0.326706
APOE	-0.28616	0.27604	0.325323
HNMT	-0.332629	0.265996	0.313792
TK1	-0.184111	0.265571	0.313598
RALGAPB	-0.445788	0.261767	0.309408
ZBTB7A	-0.554387	0.258359	0.305978
FOXA1	-0.485712	0.258165	0.305978
RREB1	-0.482582	0.256277	0.304109
KIAA0100	-0.357087	0.255843	0.304109
FAM114A1	-0.219891	0.252326	0.300305
MKNK2	-0.257691	0.251009	0.299032
TUBB6	-0.380827	0.250405	0.298607
RAI14	-0.178287	0.248578	0.297015
ITGB6	-0.0919972	0.248312	0.296992
CCNK	-0.420358	0.246913	0.295903
PIM1	-0.183499	0.24626	0.295414
TPX2	-0.154315	0.245713	0.29505
SDCBP	-0.0947866	0.2434	0.292564
RDH10	-0.438904	0.242438	0.291989
ATP2B1	-0.0774735	0.242411	0.291989
LINC00467	-0.1609	0.237682	0.286833
CENPF	-0.132343	0.234893	0.283751
SYNGR2	-0.126578	0.234886	0.283751
MISP	-0.283818	0.234732	0.283751
MKLN1	-0.242665	0.233627	0.283071
NMU	-0.363187	0.233046	0.28265
SNHG19	-0.355079	0.232813	0.28265
APOC1	-0.268015	0.232193	0.282182
IFT27	-0.21506	0.232193	0.282182
IFITM1	-0.183097	0.230607	0.281103
TNFAIP2	-0.163753	0.230143	0.280821
FOSL2	-0.195732	0.230051	0.280821
TMCO3	-0.272764	0.227798	0.278804
BTBD1	-0.428791	0.224473	0.275014
LRP10	-0.141329	0.223863	0.274545
IGHG3	-0.180827	0.22297	0.273727
RHOD	-0.416131	0.221017	0.271606
FAM84B	-0.274528	0.220991	0.271606
SLC7A6OS	-0.451296	0.219012	0.269691
UBE3B	-0.365836	0.218451	0.269275
DVL1	-0.249553	0.216996	0.267887
SLC34A2	-0.543667	0.215958	0.267018
GNPNAT1	-0.346191	0.21539	0.266589
RRS1	-0.526461	0.212384	0.263408
AURKA	-0.231354	0.208723	0.259134
CRKL	-0.233276	0.20688	0.257375
HMOX1	-0.59006	0.205517	0.255943
FDX1	-0.176587	0.205158	0.255759
TMEM248	-0.266346	0.203761	0.25428
C6orf226	-0.368567	0.203633	0.25428
CCDC82	-0.459793	0.203313	0.254246
CDC20	-0.270054	0.201048	0.251674
GLB1	-0.488927	0.19954	0.250263
TMTC3	-0.372355	0.198533	0.249302
RAB31	-0.342042	0.197863	0.248718
MTHFD2L	-0.474128	0.197697	0.248718
RASSF1	-0.378367	0.197051	0.248215
SPOPL	-0.301115	0.196986	0.248215
NUSAP1	-0.158784	0.196396	0.247906
TRIP6	-0.38055	0.190401	0.240591
CHP1	-0.18324	0.189734	0.239998
GFER	-0.206188	0.185989	0.235508
SPR	-0.524814	0.178951	0.226834
VAMP5	-0.303131	0.177693	0.225476
RPL26L1	-0.34146	0.177491	0.225456
ICAM1	-0.299097	0.176437	0.224353
CTHRC1	-0.139377	0.175301	0.223143
BIRC5	-0.295508	0.173126	0.220607
SDC1	-0.269307	0.172359	0.219862
BORCS8	-0.387307	0.171872	0.219473
NFU1	-0.267128	0.171376	0.21907
SMCO4	-0.172925	0.171317	0.21907
NKG7	-0.446213	0.170843	0.219003
ACACA	-0.612581	0.168999	0.216952
NELFA	-0.512342	0.168636	0.216715
PIGQ	-0.503547	0.166711	0.214469
TMEM128	-0.499454	0.165789	0.21351
ANKRD40	-0.605985	0.165461	0.213316
SIPA1	-0.385056	0.164218	0.21194
JUND	-0.195161	0.159939	0.206638
MAP7D1	-0.400431	0.15816	0.204559
RANGRF	-0.481069	0.156964	0.203229
PTPRS	-0.524705	0.156954	0.203229
PHLDA1	-0.285086	0.156531	0.203103
SPTBN1	-0.267961	0.155423	0.201883
COL1A1	-0.426722	0.155289	0.201883
CKAP5	-0.508294	0.155255	0.201883
IFITM2	-0.211011	0.154179	0.200915
C6orf132	-0.17164	0.153471	0.200209
ATXN1	-0.466203	0.153319	0.200209
NMB	-0.075264	0.152527	0.199407
SPINK5	-0.605896	0.152097	0.199062
QKI	-0.428179	0.1497	0.196137
CHCHD7	-0.336903	0.149681	0.196137
PLS1	-0.584908	0.147061	0.193308
KRT7	-0.545595	0.14662	0.192938
PARD6B	-0.466811	0.146417	0.19288
TAF6	-0.357562	0.144828	0.191205
PTTG1	-0.15522	0.144514	0.190999
MFSD14B	-0.474285	0.14344	0.189787
RAD51AP1	-0.162681	0.143105	0.189551
JCHAIN	-0.608928	0.142668	0.18918
ERBB2	-0.265009	0.141793	0.188227
CKS1B	-0.139765	0.13969	0.185639
DNAJB14	-0.349529	0.139389	0.185443
EIF2B2	-0.600137	0.139326	0.185443
EPS8L1	-0.352795	0.139098	0.185443
RABL6	-0.502079	0.137526	0.183571
RAB27A	-0.571946	0.13488	0.180239
THAP7	-0.143218	0.132914	0.177808
SPTAN1	-0.401243	0.132528	0.177488
COTL1	-0.764662	0.131484	0.176285
ARL2BP	-0.473192	0.13094	0.175751
FNBP1	-0.541957	0.12853	0.17272
APLP2	-0.21109	0.128253	0.172719
MIF4GD	-0.430553	0.128133	0.172719
LAMTOR3	-0.434878	0.128043	0.172719
ANKRD13A	-0.669169	0.124093	0.167678
RAB9A	-0.57667	0.123843	0.167528
CASP4	-0.339649	0.123636	0.167435
EGLN1	-0.435793	0.123631	0.167435
TMEM159	-0.446141	0.122811	0.16688
MTFR1	-0.476613	0.121356	0.165088
SAA1	-0.39493	0.120808	0.164528
SDR16C5	-0.429004	0.119695	0.163196
CLEC2B	-0.570681	0.119291	0.162828
KIAA1551	-0.570749	0.118827	0.162379
GLS	-0.650529	0.118674	0.162354
CBR4	-0.691771	0.116827	0.16019
UGDH	-0.140456	0.116348	0.159714
DUSP1	-0.16663	0.11615	0.159623
HIPK3	-0.599797	0.11366	0.15638
CCDC90B	-0.19304	0.110025	0.151551
ID3	-0.134169	0.107711	0.148702
SDCCAG8	-0.171196	0.107528	0.14862
MAD2L1	-0.28978	0.107446	0.14862
SLC4A1AP	-0.549305	0.107305	0.14862
USB1	-0.42758	0.106217	0.147314
CEBPB	-0.179311	0.10328	0.143405
MYL9	-0.264593	0.102021	0.141984
CD3D	-0.743578	0.10174	0.141919
FLNA	-0.115959	0.100144	0.139854
IRAK1	-0.420978	0.0988427	0.138197
ICMT	-0.354792	0.0975446	0.13654
PDXK	-0.277273	0.0975033	0.13654
S100A4	-0.297503	0.0967483	0.13574
SSFA2	-0.604487	0.0949152	0.133323
TMEM120A	-0.52975	0.094693	0.133321
CDH3	-0.513151	0.0941328	0.132687
KCNS3	-0.643133	0.093989	0.132639
HCST	-0.959336	0.0927423	0.131032
RPS28	-0.796531	0.0921552	0.130355
DST	-0.547478	0.0915383	0.129635
CD52	-0.515772	0.0901722	0.12785
FBXO32	-0.283516	0.0894279	0.126943
FBXL15	-0.719673	0.0889664	0.126437
BET1	-0.247552	0.0882238	0.125529
C16orf72	-0.555814	0.0855661	0.122179
MIB2	-0.493203	0.0852536	0.121877
JOSD2	-0.389063	0.0852165	0.121877
CBLC	-0.661743	0.0836468	0.119864
XIAP	-0.530181	0.0832399	0.119423
IL13RA1	-0.332812	0.0830522	0.119295
TMED5	-0.50477	0.0825	0.118643
DIAPH1	-0.478451	0.0817506	0.117705
CCL5	-0.578384	0.0817416	0.117705
TBC1D10A	-0.688398	0.0812857	0.117316
OGFOD3	-0.450802	0.0811788	0.117301
BCL2L1	-0.295894	0.0809267	0.117077
PRSS8	-0.227112	0.0802653	0.11626
GALNT2	-0.178337	0.0796698	0.115536
FAM91A1	-0.768234	0.0789181	0.114583
KIF20B	-0.453342	0.0781664	0.113628
MAGT1	-0.384457	0.0780484	0.113593
CDS2	-0.593996	0.0768451	0.111977
CD81	-0.264681	0.0765219	0.111641
CDK2AP2	-0.219199	0.0755701	0.110385
SLMAP	-0.675807	0.0754889	0.110385
JKAMP	-0.54362	0.0744479	0.10901
PURB	-0.734735	0.0744285	0.10901
GSKIP	-0.702344	0.0735035	0.107889
PTRH1	-0.700902	0.0731727	0.107534
CSNK1E	-0.370709	0.0724119	0.106545
CREBZF	-0.437236	0.0723957	0.106545
PSEN1	-0.646397	0.0709496	0.104824
MSRB1	-0.256492	0.0705117	0.104385
BIK	-0.49888	0.070472	0.104385
STRN3	-0.62793	0.0696688	0.103391
MIS18BP1	-0.238067	0.0676487	0.100516
CCNB1	-0.368808	0.0664701	0.0988865
NAT9	-0.687082	0.0643155	0.0957992
GGH	-0.299239	0.064188	0.0957273
PRC1	-0.354606	0.0634491	0.0947423
UBE2Z	-0.396706	0.0632334	0.0945371
EXOC1	-0.472588	0.061487	0.0920401
CCDC77	-0.566111	0.0602606	0.0903161
RB1	-0.873369	0.0594328	0.0891861
HERC4	-0.495958	0.0569504	0.0855672
SETD9	-0.728706	0.0565698	0.0851012
RGS19	-0.677367	0.0565477	0.0851012
MARK2	-0.665005	0.0562286	0.0847992
CCL4	-0.608514	0.0555427	0.0838695
ATAD1	-0.501405	0.0551246	0.0833423
PIAS3	-0.591625	0.0549607	0.0831986
C5orf51	-0.568374	0.054866	0.0831595
IGHM	-0.482045	0.0545484	0.082782
KIAA0319L	-0.7047	0.0542963	0.082503
TRAF2	-0.674714	0.0539136	0.0820247
TNKS2	-0.673523	0.0535584	0.0815871
BCL7B	-0.464676	0.0534573	0.0815359
XPO5	-0.75074	0.0533774	0.0815169
DPM2	-0.253108	0.0533731	0.0815169
ECE2	-0.529726	0.0527498	0.0807627
P2RX4	-0.537032	0.0520748	0.0798304
LARP4B	-0.508264	0.0515397	0.0791104
FASN	-0.569452	0.0512362	0.0787447
HMGB2	-0.239415	0.0511591	0.0787263
TTC9C	-0.473303	0.0508171	0.0782999
PDLIM5	-0.501667	0.0501111	0.0773106
ARL4A	-0.503938	0.0498048	0.0769363
SEPT11	-0.512217	0.048864	0.0755797
EHBP1	-0.772545	0.0485273	0.0751551
PGGT1B	-0.72921	0.0480094	0.0744485
SKI	-0.761816	0.0473952	0.0735906
CKAP4	-0.506086	0.0471787	0.0733486
CENPN	-0.511255	0.0471446	0.0733486
GLT8D1	-0.630195	0.0470651	0.0733486
ZBTB44	-0.825821	0.0469574	0.0732875
PHKG2	-0.745642	0.0467632	0.0730789
TM9SF4	-0.657471	0.046566	0.072865
APOBEC3C	-0.886853	0.0465285	0.072865
NIPA2	-0.477042	0.0461793	0.0724475
TMEM203	-0.540263	0.0460138	0.0722818
THAP1	-0.784336	0.0454819	0.0715392
WDR13	-0.641942	0.0449151	0.0707398
ZNF544	-0.644282	0.0447625	0.0705915
PGAP2	-0.72275	0.0446448	0.0704979
CXCL13	-0.834076	0.0439563	0.0695015
INTS3	-0.546648	0.0433667	0.0686592
CALU	-0.213427	0.0433102	0.0686592
MIR4435-2HG	-0.353909	0.0416653	0.0661388
CCDC88C	-0.96029	0.0412218	0.065521
C12orf75	-0.19694	0.0411914	0.065521
TRAPPC4	-0.407096	0.0406902	0.0648467
UBR4	-0.693985	0.0397001	0.0633524
RIPK2	-0.546925	0.0391496	0.0625565
C8orf76	-0.848592	0.0385353	0.0616564
SGK1	-0.736922	0.0380696	0.0609922
TUBE1	-0.76347	0.0377844	0.0606155
QSOX1	-0.251333	0.037515	0.0602634
NEK7	-0.895352	0.0370259	0.0595569
TMED7	-0.50818	0.0368179	0.0593014
DCPS	-0.787113	0.0361122	0.0582424
PEX10	-0.742654	0.0353854	0.0572089
ISCA2	-0.411091	0.0352416	0.0571434
SPCS3	-0.359254	0.0351602	0.0570881
KNSTRN	-0.600923	0.0351469	0.0570881
SLC31A1	-0.811231	0.0344324	0.0560571
RCE1	-0.641486	0.0342659	0.0558612
ST20	-0.668628	0.0342211	0.0558612
SPPL3	-0.678767	0.0341158	0.0558427
EMC6	-0.187651	0.0340051	0.055737
GBE1	-0.628876	0.0338046	0.0554836
HCFC1R1	-0.304469	0.0335227	0.0550958
CLSPN	-0.540125	0.0328087	0.0539958
DTX3L	-0.455328	0.0317621	0.0523447
VRK1	-0.647977	0.0315932	0.0521374
CRELD2	-0.521203	0.031464	0.0519952
ACAT1	-0.744725	0.0314318	0.0519952
KIAA1143	-0.595343	0.0307693	0.0509868
MEF2A	-0.683534	0.0306549	0.0508668
ZNF800	-1.00631	0.0305303	0.0507298
C1GALT1	-0.686932	0.0305041	0.0507298
PMEPA1	-0.351742	0.0303487	0.0505673
IMPACT	-0.695693	0.0302668	0.0505004
RIN2	-0.522971	0.0301306	0.0503427
TRIM37	-1.12631	0.0298303	0.0499099
RPRD2	-0.527796	0.0297482	0.0498417
ZNF576	-0.892491	0.029674	0.0497864
POLD3	-0.765674	0.0294956	0.0495559
PUS1	-0.813255	0.0293232	0.0493349
MAP2K1	-0.485281	0.0292083	0.0492101
IFIT1	-0.869873	0.0290838	0.0490687
ZNF770	-0.687182	0.0282296	0.0476941
TBC1D22A	-0.881588	0.0281574	0.0476389
SLF1	-0.919545	0.0281416	0.0476389
DTYMK	-0.23023	0.0275861	0.0468034
MAPKAP1	-0.643142	0.0275645	0.0468034
CDH1	-0.408098	0.0274615	0.0467233
LIMCH1	-0.386008	0.0270283	0.046051
NUP153	-0.916791	0.0268121	0.0457473
TFF3	-1.05366	0.0264409	0.0451777
C1S	-0.873138	0.0264085	0.0451777
STEAP3	-0.910252	0.0263393	0.0451317
SEMA3C	-0.719143	0.0253393	0.0434799
CKAP2	-0.351018	0.0250166	0.0429873
NUBP1	-0.763398	0.0250034	0.0429873
ITFG1	-0.564102	0.0246257	0.0424969
TOR1A	-0.670566	0.0245225	0.0423794
BOLA1	-0.481372	0.0245085	0.0423794
DPYSL2	-0.59131	0.0242422	0.0420151
FBXO11	-1.01924	0.0241276	0.0418766
PIK3IP1	-1.03488	0.0240263	0.0417608
RFC3	-0.752434	0.0238321	0.041483
AZI2	-0.650983	0.0235293	0.041015
CENPU	-0.489609	0.0234687	0.0409686
ELK4	-0.766039	0.023102	0.0403866
MRPS17	-0.836565	0.0229511	0.0401811
BLOC1S6	-0.621742	0.0227554	0.0398962
NSF	-0.635402	0.0227442	0.0398962
CENPW	-0.31318	0.0226469	0.0398217
TGIF1	-0.310201	0.02255	0.0397091
ATL3	-0.613403	0.0223423	0.0394007
ATP5S	-0.914494	0.0223343	0.0394007
SLC20A1	-0.59149	0.0222754	0.0393978
H2AFX	-0.722027	0.0222266	0.0393691
PDE6D	-0.826698	0.022058	0.0391278
ECE1	-0.420311	0.0219268	0.0389524
PTRH2	-0.6231	0.0215443	0.0383292
PSPC1	-0.860443	0.0212794	0.0379137
DCUN1D1	-0.596388	0.0209294	0.0373452
POR	-0.628108	0.0206627	0.0369238
BDH2	-0.841416	0.0206561	0.0369238
UBE2W	-0.46885	0.0203473	0.0364681
CDK2	-0.710108	0.0203187	0.0364681
LRPAP1	-0.366201	0.0201848	0.0362845
BCL2L13	-0.644487	0.020129	0.0362382
B4GALT1	-0.344384	0.0198776	0.035839
RAB5B	-0.542914	0.0196092	0.035408
BRWD1	-0.596633	0.0194909	0.035247
FAM111A	-0.658196	0.0194297	0.0351891
CXCL16	-0.440238	0.0193247	0.0350514
ARMCX3	-0.68204	0.0188489	0.0342399
MTERF3	-0.867101	0.0183751	0.0334293
FBXO6	-0.561922	0.0183481	0.0334293
ARSD	-0.649793	0.0182825	0.0333615
MFAP1	-0.57101	0.0177818	0.0324969
UBA3	-0.401205	0.0175465	0.0321154
SHOC2	-0.849927	0.0173436	0.0317922
RCAN3	-0.636975	0.0172596	0.0316863
STXBP3	-0.890412	0.0170383	0.0313276
CASP2	-1.06852	0.0168764	0.0310774
IER3	-0.351079	0.0168577	0.0310774
ECD	-1.26138	0.0166966	0.0308402
ARL16	-0.412089	0.0166966	0.0308402
PPP4R3A	-0.623742	0.0166131	0.0307801
IFI35	-0.352828	0.0164824	0.0305848
TRPT1	-0.444103	0.0160514	0.0298309
TMEM181	-0.944816	0.0160477	0.0298309
STX16	-0.66478	0.015935	0.029706
PSMD5	-1.00498	0.0159201	0.029706
CBY1	-0.602302	0.0155152	0.029058
TNFRSF14	-0.65906	0.0154935	0.029058
DCK	-0.577624	0.0153821	0.0288982
TRIM11	-0.686794	0.0152807	0.0287524
CBX6	-1.21559	0.0150946	0.0284466
EDEM2	-0.842967	0.0148153	0.027964
DNAJC11	-0.92189	0.0147868	0.0279537
LDLR	-0.923373	0.0146191	0.02768
ZFP36L2	-0.430882	0.0145091	0.027515
MIDN	-0.373549	0.01449	0.027515
XRCC4	-0.595751	0.0144681	0.027515
MED13	-0.837469	0.0144613	0.027515
SLC12A2	-1.27928	0.014187	0.0270741
SLFN5	-0.656501	0.0140253	0.0268079
GLMP	-0.597847	0.0137761	0.0263732
INSIG2	-0.517491	0.0135488	0.0259792
SCYL2	-0.666111	0.0135236	0.0259722
MSN	-0.510616	0.0134568	0.0258851
WDFY1	-0.682988	0.0134076	0.0258315
CENPH	-0.55998	0.0133413	0.0257448
CENPM	-0.842517	0.0131373	0.0253917
TINAGL1	-0.426739	0.0130173	0.0252001
SREBF1	-1.02724	0.0130086	0.0252001
YIPF1	-0.877504	0.0129788	0.0252001
NFS1	-0.964777	0.0129601	0.0252001
TOP2B	-0.785358	0.0128613	0.0250588
NUDT22	-0.466631	0.0128238	0.0250261
CRABP2	-0.541018	0.0125851	0.0245999
SUMF2	-0.357663	0.0123568	0.0241929
G6PD	-0.532038	0.0123123	0.0241449
PABPC4	-1.0804	0.0118447	0.0232656
CHTF8	-0.607949	0.0116537	0.0229279
EPPK1	-1.20415	0.0116374	0.0229279
MUCL1	-1.05919	0.0114244	0.0225502
STAT2	-0.573707	0.0113333	0.0224069
ATF7	-0.77938	0.0112499	0.0222785
GTF2E2	-0.537392	0.0112417	0.0222785
PCGF5	-0.72095	0.0112406	0.0222785
RAB8A	-0.56926	0.0112264	0.0222785
SUPT6H	-0.883043	0.0111492	0.0222247
NTMT1	-0.388494	0.0111481	0.0222247
U2AF1L4	-1.27512	0.0111291	0.0222247
PHACTR2	-0.862198	0.0110551	0.0221469
SGMS1	-0.732619	0.0110229	0.022119
SMC6	-0.781135	0.010892	0.0218927
DDX60	-1.12753	0.0108268	0.021798
C12orf43	-0.868361	0.0107851	0.0217503
LRIG3	-1.23952	0.0106032	0.0214192
STK16	-0.847446	0.0105918	0.0214192
RAB35	-0.891597	0.0105861	0.0214192
DNAJC12	-1.08986	0.0105499	0.021419
ZSCAN16-AS1	-1.1467	0.0104917	0.0213366
AGRN	-0.354295	0.0100966	0.0205677
SERPINB4	-1.11427	0.0100792	0.020567
SMAGP	-0.566955	0.0100036	0.0204473
INSR	-0.759701	0.00990502	0.0202801
PTGR1	-0.248582	0.00989136	0.0202801
SLC12A7	-0.576632	0.00975372	0.0200383
PLEKHO1	-0.948732	0.00966307	0.0198858
WSB2	-0.796225	0.00959641	0.0197824
CNOT1	-0.855117	0.00944184	0.019497
SOS1	-1.09616	0.00931118	0.0192601
RLF	-1.05618	0.00925864	0.0191843
COPG1	-0.86909	0.00900301	0.0186867
PHLDA2	-0.42682	0.00892039	0.0185471
TMEM256	-0.535167	0.00878567	0.0182984
ARID1B	-1.11802	0.00870571	0.0181632
ADNP	-0.810226	0.00868528	0.0181519
LYAR	-0.988343	0.00855502	0.0179107
EMC8	-0.747944	0.00852764	0.0178844
CTDSP1	-0.581597	0.0084846	0.017825
ZDHHC12	-0.423492	0.00839445	0.0176664
HOXB7	-0.785859	0.00836459	0.0176342
SOCS1	-1.16408	0.00814674	0.017205
IRF2BPL	-0.788194	0.00806509	0.0170624
ERLIN2	-1.3819	0.00805859	0.0170624
TMEM167B	-0.920526	0.00801443	0.0170148
PSME4	-0.710148	0.00796406	0.0169675
BCKDK	-0.586315	0.00795603	0.0169675
RFK	-0.600704	0.00788167	0.0168514
CCNDBP1	-0.681336	0.00767902	0.0164473
RNF34	-0.698719	0.00763789	0.0163882
TEX30	-0.904408	0.0075808	0.0162947
TIMM8A	-1.16001	0.00755048	0.0162584
DENND1B	-0.957957	0.00751951	0.0162207
KPNA2	-0.426877	0.00745033	0.0161002
FKBP7	-1.12926	0.00743369	0.016093
ZC3H12A	-0.930908	0.0073525	0.0159458
C1orf56	-0.472068	0.00715918	0.0155545
FIS1	-0.34051	0.00711802	0.0154929
RPS6KB2	-0.614766	0.00711584	0.0154929
ANXA3	-0.562572	0.00698115	0.01525
DUSP22	-0.658227	0.00696902	0.01525
TMEM245	-0.825156	0.00693416	0.0152023
IGLC3	-0.326103	0.00691714	0.0151926
CCDC174	-0.862387	0.00682632	0.0150204
CETN3	-0.641763	0.00667459	0.0147133
MED28	-0.523018	0.00665335	0.0146933
EMC2	-0.491018	0.00657444	0.0145457
ZMAT5	-0.633242	0.00654473	0.0145065
EIF3B	-0.462295	0.00653161	0.014504
PCYT1A	-1.0042	0.00642411	0.0142916
BORCS7	-1.11003	0.00621036	0.0138415
C12orf76	-0.921342	0.00619591	0.0138349
BPGM	-1.25495	0.00598808	0.0133955
SERTAD3	-0.858812	0.00592339	0.0132754
SMIM4	-0.967921	0.00591785	0.0132754
TYW3	-0.868249	0.00591047	0.0132754
PRKCI	-0.542101	0.00587888	0.0132494
PLBD1	-0.946678	0.00587368	0.0132494
SLC30A7	-1.00461	0.00577119	0.0130554
SUPT3H	-1.0779	0.00574267	0.0130153
HPCAL1	-0.479858	0.00571428	0.0129753
TTC17	-0.968564	0.00563752	0.0128251
CTDSPL2	-1.19104	0.00561841	0.0128057
CD55	-0.354509	0.00552109	0.0126077
TSPAN12	-1.27214	0.00550291	0.01259
EBAG9	-0.794064	0.00545411	0.012502
SOCS3	-0.623572	0.00543898	0.012491
MBNL1	-0.559328	0.00539267	0.0124083
TRIB3	-1.23059	0.00537092	0.0123818
SUCLG2	-0.564043	0.00537064	0.0123818
ARRB2	-1.14297	0.00531061	0.0122897
PTN	-0.829254	0.00525589	0.0121864
EMP1	-0.821774	0.0052272	0.0121432
HERC6	-1.09132	0.00522308	0.0121432
SNAPC5	-0.624223	0.00517571	0.01207
RHOV	-0.499879	0.00512629	0.0119779
CBR1	-0.638032	0.0050961	0.0119304
RPL39L	-0.400285	0.00504284	0.0118286
GOT2	-1.01918	0.00496745	0.0116745
SP140L	-1.01702	0.0049006	0.0115398
DCUN1D5	-0.711648	0.0048698	0.0114897
TMA16	-0.460839	0.00485665	0.0114811
RABEP1	-1.45935	0.00467795	0.0110803
FAM96A	-0.59683	0.00467472	0.0110803
WDR45	-0.839225	0.00467223	0.0110803
BPNT1	-0.946324	0.00464842	0.0110755
S100A8	-0.426337	0.0046294	0.011052
TBK1	-1.04159	0.00447333	0.0107006
TOLLIP	-0.736729	0.00442057	0.0105953
WDR60	-0.731201	0.00441537	0.0105953
SLC25A1	-0.504625	0.00438758	0.0105582
MRAS	-1.17568	0.00437749	0.0105549
NR2C2AP	-1.07806	0.00433271	0.0104678
EEA1	-1.09153	0.00431603	0.0104484
SBDS	-0.332774	0.00431603	0.0104484
COPS7B	-0.922307	0.00429917	0.0104484
SOAT1	-0.895809	0.00427296	0.0104067
KIF9	-1.03382	0.00421849	0.0102948
ANAPC10	-0.74387	0.00417654	0.0102131
PEMT	-0.948572	0.00414855	0.0101652
DDX23	-0.672266	0.0041461	0.0101652
MRS2	-0.721194	0.00405206	0.00996921
GLRX	-0.596005	0.0040257	0.00992458
ORC2	-1.50215	0.00397131	0.00981051
CCND1	-0.503289	0.00396381	0.00981051
TAOK3	-0.764546	0.00392904	0.00974595
MAP1B	-1.06079	0.00392437	0.00974595
PIGK	-1.01344	0.00386619	0.00962961
NAA60	-1.10495	0.00383158	0.00956313
SRGAP1	-1.05427	0.00381749	0.00954767
MRPS27	-1.28775	0.00370983	0.009317
FAM98C	-0.949643	0.00361399	0.0090952
SUV39H2	-1.24405	0.00360494	0.00909137
RBM26	-0.989296	0.00359984	0.00909137
PTP4A2	-0.44884	0.00353195	0.00894465
CEP70	-0.684382	0.00349644	0.00887333
ADPGK	-0.86206	0.00345653	0.0087905
MXD1	-1.04299	0.0033698	0.00858803
ARL6IP1	-0.383736	0.00335027	0.0085563
OVOL2	-1.39545	0.00332993	0.00852236
SARNP	-0.965649	0.00305653	0.00783926
ETV6	-0.961937	0.00299524	0.00769839
SLC35B3	-1.13068	0.00297901	0.00767302
OTUD7B	-1.12711	0.00297274	0.00767302
MOSPD3	-1.05528	0.00297159	0.00767302
SYNC	-1.1194	0.00288817	0.00748692
MFN1	-1.01832	0.00288624	0.00748692
CNKSR3	-1.41832	0.00288303	0.00748692
MT-ND3	-0.701469	0.00285162	0.00744008
DCP1A	-1.00075	0.00279346	0.00733588
NFKBIZ	-0.845612	0.00274129	0.00721454
APOL3	-1.1108	0.00272085	0.00717639
UCHL5	-0.601758	0.00269136	0.00711413
USP6NL	-1.22027	0.00265754	0.00704015
DEFB1	-0.56526	0.00265397	0.00704015
SMG7	-0.772462	0.00262382	0.00698143
CKS2	-0.412221	0.00261647	0.00697726
ACOT7	-1.03017	0.0024914	0.00665844
IFI27L1	-1.23641	0.00247407	0.00662677
PDPK1	-1.21146	0.00246933	0.00662677
PTPMT1	-0.746221	0.00245435	0.00660325
KIT	-0.970792	0.00241168	0.00650291
TNFAIP8	-1.20854	0.00236232	0.00638408
DNAJB9	-0.92838	0.00235379	0.00637528
MKNK1	-1.12341	0.00232335	0.00630698
NUP155	-0.731031	0.00229145	0.0062344
NECAP1	-1.05272	0.00225445	0.00614756
CDC42SE2	-0.940347	0.00222886	0.00609153
ERGIC1	-0.541817	0.00219565	0.00601439
UTP23	-1.085	0.00208678	0.00572917
ANKRD17	-1.16563	0.00202388	0.00556914
NINJ2	-1.29484	0.00200702	0.00553535
ZCCHC10	-1.09534	0.00192907	0.00533254
TMEM33	-0.618254	0.00188256	0.00521591
HCCS	-1.28442	0.0018739	0.00520385
NUDT15	-0.795837	0.00186077	0.00517928
IFNGR1	-0.677228	0.00184889	0.00515811
REXO2	-0.588986	0.00183359	0.00512725
C15orf40	-0.902866	0.00181127	0.00507659
DPF2	-1.03864	0.00177291	0.00498064
LARP6	-1.11643	0.00176748	0.00497695
CHIC2	-1.01825	0.0017355	0.00489834
STAU2	-1.0117	0.00166993	0.0047354
MTFR1L	-1.04685	0.00163606	0.00465025
BCL7A	-1.11754	0.00163558	0.00465025
NDUFAF2	-0.961039	0.00161709	0.00461807
WEE1	-0.77679	0.00155693	0.00445681
DYRK2	-1.51186	0.00149366	0.00428584
EIF2B5	-0.807792	0.00147552	0.00424389
WSB1	-0.471821	0.00142033	0.00409487
CTSS	-0.742593	0.00138991	0.00401678
MOCS2	-0.785385	0.00137481	0.00398267
C2orf68	-1.1407	0.00136922	0.003976
TRAF7	-0.721343	0.00134865	0.0039257
RNASEH2C	-0.510919	0.00132789	0.00387462
CHCHD6	-1.22795	0.0013	0.00380243
ACTR1A	-0.853477	0.00128795	0.00377631
CCDC58	-0.808275	0.00128565	0.00377631
PRIM1	-0.796453	0.00128451	0.00377631
FAIM	-1.23108	0.0012509	0.00369459
CHMP4C	-1.00108	0.00122948	0.00364023
SAMD9	-0.739743	0.00118816	0.00352652
CKLF	-0.519354	0.00118624	0.00352652
GALE	-0.754527	0.00118454	0.00352652
FAM207A	-0.799342	0.00118384	0.00352652
CREB3	-0.609966	0.0011564	0.00346633
SURF2	-0.929212	0.00115564	0.00346633
RTKN	-1.13514	0.00115067	0.00346633
SAMD9L	-1.49411	0.00115053	0.00346633
GOLT1B	-0.54127	0.00113533	0.00343728
TMEM101	-0.747283	0.00109247	0.00331582
MYCBP	-1.03307	0.0010837	0.00329749
WBP4	-1.02763	0.00108252	0.00329749
BTN3A2	-1.19321	0.00106996	0.00327217
BLOC1S2	-0.792991	0.00104472	0.0032031
CYB5R1	-0.761063	0.00104327	0.0032031
WWTR1	-1.08266	0.000991142	0.00305434
MT1F	-0.989801	0.000949939	0.00293485
PCMTD1	-0.75871	0.000929598	0.00287937
DYNLT3	-0.924491	0.000928863	0.00287937
FBP1	-1.03239	0.000922946	0.0028735
APOL2	-0.81756	0.000914887	0.00285577
PPP2R5E	-0.838006	0.00089743	0.00280854
ZCCHC6	-1.5584	0.000876205	0.00274923
BACE2	-0.913567	0.000870705	0.00273909
CYFIP1	-1.00894	0.00086895	0.00273909
GABARAPL1	-0.72846	0.000867623	0.00273909
PPP3CA	-1.07672	0.000858751	0.00272276
ZFAND2A	-0.897837	0.000843685	0.00268203
TRA2A	-0.796368	0.000841619	0.00268203
HMGCS1	-1.19497	0.000840382	0.00268203
STX8	-0.839003	0.000838684	0.00268203
NDUFA4L2	-0.943523	0.00082973	0.00266573
CMC2	-0.707884	0.000813937	0.00262196
YPEL2	-1.07551	0.000812638	0.00262196
ARFGAP3	-0.846283	0.000794649	0.00257355
FMR1	-1.25098	0.000763394	0.00247898
RALB	-1.12095	0.000761606	0.00247898
HILPDA	-0.737431	0.000749101	0.00244571
NSUN6	-1.00422	0.00072655	0.00237852
ISG20	-0.533824	0.000724348	0.00237775
HLA-DQB1	-0.849237	0.000722421	0.00237775
PDLIM4	-1.2545	0.000711706	0.00234902
LMCD1	-1.31975	0.000703495	0.00232828
C1orf198	-0.840444	0.000702752	0.00232828
GTF3C3	-1.37211	0.000697188	0.00232012
C1R	-1.13354	0.000694076	0.00231614
SPG7	-1.11604	0.000690977	0.00231219
NFATC3	-1.2544	0.000684562	0.00229708
HSCB	-0.97926	0.000683413	0.00229708
HSD17B12	-0.800423	0.000678371	0.00228903
UBXN7	-1.12411	0.000665025	0.00225028
ABCD3	-1.28378	0.000654614	0.00222127
FN1	-0.804067	0.000632028	0.00215067
PCF11	-1.16677	0.000622488	0.0021242
PEA15	-0.942613	0.000615046	0.00210475
CD82	-1.57616	0.000600107	0.00205946
ZFPL1	-0.969869	0.000595191	0.00204841
CALML5	-1.17338	0.000593063	0.00204691
LRRC40	-0.984813	0.000592132	0.00204691
TXNIP	-0.555743	0.000591835	0.00204691
RHOT1	-0.990752	0.000579169	0.00201624
PYM1	-0.803496	0.000537309	0.00187592
EFR3A	-1.0309	0.00053338	0.0018676
EGLN3	-1.27625	0.000510717	0.00179345
PNPLA2	-0.735043	0.000509422	0.00179345
RPE	-0.875952	0.000508097	0.00179345
RIT1	-0.589095	0.00050533	0.00179014
SART1	-1.10004	0.000497364	0.0017671
IFIT3	-1.03327	0.000476376	0.00169753
DNAJC15	-0.709654	0.000476346	0.00169753
FAM111B	-1.08975	0.000475496	0.00169753
APOL1	-0.927865	0.000456159	0.00164
IQCG	-1.67121	0.000454324	0.00163828
TSR2	-1.00044	0.000452844	0.00163783
CORO1C	-0.758638	0.00044958	0.00163091
USE1	-0.952854	0.000444712	0.00161811
COX11	-0.888782	0.000444712	0.00161811
STK3	-1.14154	0.000441729	0.001617
SLC18B1	-1.40059	0.000435569	0.00159929
WRAP73	-0.87334	0.000423869	0.00156108
RTP4	-1.23816	0.000408998	0.00151092
ZFP36	-0.570837	0.000398249	0.00147572
TFRC	-1.26201	0.000393521	0.00146269
C5orf56	-1.96899	0.000371015	0.00138329
ARID5A	-1.2396	0.000368497	0.00137816
SLC44A1	-0.614394	0.000359261	0.00134779
CTSB	-0.52108	0.000354206	0.00133296
TMEM189	-1.20153	0.000345193	0.00130719
C12orf29	-1.04205	0.000331901	0.00126081
AGPAT5	-0.907199	0.000331706	0.00126081
RBM6	-1.03825	0.000320597	0.00122557
USP10	-1.13321	0.000313762	0.00120325
EZH2	-0.956291	0.000310651	0.00119511
CTSH	-0.765493	0.000305777	0.00118012
CCND3	-0.696391	0.000302799	0.00117238
SNX1	-1.15505	0.000299081	0.0011617
CHMP1B	-0.597063	0.000297004	0.00115736
CCDC127	-1.01062	0.000290412	0.00113533
HIST1H1C	-0.613005	0.000267933	0.00105085
WDR18	-0.825152	0.000258274	0.00101627
MRPS31	-1.64279	0.000256957	0.00101439
SPPL2A	-1.16839	0.000249571	0.000988466
WDR70	-0.725563	0.000247044	0.000981676
CALD1	-0.849868	0.000244102	0.000973186
PABPN1	-0.780389	0.000243745	0.000973186
FBXO22	-1.27451	0.000241659	0.000969849
HIST1H2AE	-1.33019	0.000239559	0.000964623
MPDU1	-1.16545	0.0002321	0.000937716
MIIP	-1.05668	0.000218373	0.000885217
TDP2	-0.911204	0.000211707	0.000861083
DCAF11	-1.05766	0.000208165	0.00084954
DNAJA2	-0.771991	0.000202187	0.000827938
MITD1	-0.835385	0.000179665	0.000738217
FOXP1	-0.848934	0.000173337	0.000714646
TMEM223	-0.850108	0.000172338	0.000712961
PPP1CB	-0.647527	0.000165214	0.000685836
KATNA1	-0.907787	0.000164764	0.000685836
LRRC58	-1.67803	0.000153808	0.000642908
HSPA6	-1.02086	0.000152759	0.000640737
TWF1	-1.00562	0.000149629	0.000629799
IGHA1	-0.523253	0.000147986	0.000625059
PBRM1	-0.864226	0.00014756	0.000625059
MAP2K3	-1.01806	0.000147347	0.000625059
UCK2	-0.986832	0.000141318	0.000603221
NUDT2	-0.973704	0.000141113	0.000603221
RPA1	-1.06687	0.000136864	0.000588367
CAMK1D	-1.32743	0.000136205	0.000587626
PRPS2	-0.902512	0.000132762	0.000574826
XRN1	-1.14091	0.000130209	0.000565801
ORC3	-0.906317	0.00012827	0.000559385
ARMT1	-1.03797	0.000124446	0.000544676
IGBP1	-0.999176	0.000123843	0.00054401
VRK2	-1.14954	0.000121158	0.000534156
ASS1	-1.15839	0.00012104	0.000534156
ILKAP	-0.952184	0.000119453	0.000530514
SLC25A24	-0.882057	0.000119445	0.000530514
UGCG	-0.967208	0.000115363	0.000516143
TMED3	-0.660729	0.000114204	0.000512857
R3HDM2	-1.02031	0.00011139	0.000502084
EAPP	-0.914294	0.000110484	0.000499868
SMAD2	-0.963458	0.000107643	0.000488846
SETD5	-0.872421	0.000106998	0.00048775
PMAIP1	-0.825819	0.00010161	0.000464942
PKIG	-1.70627	9.97104e-05	0.000457985
CYP20A1	-1.01186	9.92425e-05	0.000457576
WDR72	-1.47221	9.51775e-05	0.000440515
PTPRK	-1.3592	9.42176e-05	0.00043775
NFKBIA	-0.633471	9.42176e-05	0.00043775
LTF	-1.3704	9.06285e-05	0.000424338
DUSP11	-1.06359	8.90555e-05	0.000418596
IFT43	-1.12808	8.60354e-05	0.00040598
MESP1	-1.21262	8.50484e-05	0.000402896
C6orf203	-1.61775	8.39351e-05	0.000399188
TMEM183A	-0.992821	8.34369e-05	0.000398387
NCK1	-0.807675	8.17441e-05	0.000391852
BPHL	-1.05264	7.9726e-05	0.000383701
THUMPD2	-1.60345	7.84441e-05	0.000379042
VLDLR	-1.63208	7.74844e-05	0.000375908
NRBP1	-0.925579	7.74514e-05	0.000375908
SRFBP1	-1.15977	7.72037e-05	0.000375908
YEATS4	-0.909652	7.68308e-05	0.000375908
SIKE1	-0.984307	7.41039e-05	0.000365378
DSC2	-0.983749	6.87744e-05	0.00034049
B3GAT3	-1.12793	6.68254e-05	0.000332202
SPECC1	-1.20578	6.49614e-05	0.00032427
SCFD1	-0.993447	6.23113e-05	0.000312332
TMEM97	-1.0645	5.87158e-05	0.000295536
MCRS1	-1.05778	5.69266e-05	0.00028773
UBL4A	-1.18293	5.59299e-05	0.00028388
IMMP1L	-1.06078	5.58773e-05	0.00028388
CLIP1	-0.882946	5.58651e-05	0.00028388
GTPBP8	-2.26798	5.4304e-05	0.000279146
PJA2	-1.1038	5.38528e-05	0.000278009
WARS	-1.00986	5.21589e-05	0.00027042
CA9	-1.03027	5.16269e-05	0.000268816
TM7SF3	-1.02502	5.14095e-05	0.000268816
METTL2A	-1.40712	5.11595e-05	0.000268699
YIPF5	-1.27375	4.9963e-05	0.000263561
SDC4	-0.664114	4.96835e-05	0.000263235
RECQL	-1.36904	4.93982e-05	0.000262877
KRTCAP3	-0.613789	4.83501e-05	0.000258438
THUMPD3-AS1	-1.1137	4.6732e-05	0.000250899
GPR108	-1.12452	4.47372e-05	0.000241261
PPM1A	-1.49785	4.4261e-05	0.000239764
CDC27	-0.88185	4.40279e-05	0.000239575
MAPK1IP1L	-0.843739	4.04119e-05	0.000220894
BARD1	-1.0371	4.03851e-05	0.000220894
RAB30-AS1	-1.09077	3.96128e-05	0.000218504
STX6	-1.16418	3.66181e-05	0.000202911
PPIC	-0.736724	3.63856e-05	0.000202552
OAT	-0.762796	3.63749e-05	0.000202552
SNRNP35	-1.09377	3.55568e-05	0.000199779
ASNSD1	-1.07735	3.55172e-05	0.000199779
DR1	-1.31072	3.51843e-05	0.000199543
RBBP5	-1.83556	3.36285e-05	0.000191619
ARHGDIB	-0.974733	3.28056e-05	0.000187816
NQO2	-0.89096	3.25429e-05	0.000187199
PDCD2L	-1.53534	3.2492e-05	0.000187199
THUMPD3	-1.53487	3.16319e-05	0.000183708
MED13L	-1.73417	3.13594e-05	0.000183005
TTC39B	-1.65408	3.11564e-05	0.000182704
MAP1LC3B	-0.627838	3.10126e-05	0.000182704
CEACAM1	-1.52198	2.97883e-05	0.000176394
PLOD2	-1.06616	2.92165e-05	0.00017386
YDJC	-1.1604	2.80935e-05	0.000168005
FABP5	-0.907597	2.7499e-05	0.000165267
HLA-F	-1.19384	2.71929e-05	0.000164245
SHPRH	-1.38914	2.67691e-05	0.000162498
SNAP29	-0.7598	2.6038e-05	0.000158858
MT2A	-0.836567	2.45915e-05	0.000150795
ATP6V1D	-0.84494	2.1744e-05	0.000134014
YWHAH	-0.687749	2.15205e-05	0.000133317
GADD45A	-0.830344	1.95541e-05	0.000121759
C9orf3	-1.12694	1.8912e-05	0.000118371
CYR61	-1.40901	1.82704e-05	0.000114951
APOL4	-1.80095	1.81143e-05	0.000114566
CCDC25	-0.888734	1.77527e-05	0.00011287
S100A7	-1.11545	1.76211e-05	0.000112626
RFC4	-1.03127	1.69782e-05	0.000109094
UBE2T	-0.732062	1.54542e-05	9.98328e-05
TLK1	-1.10767	1.54018e-05	9.98328e-05
GBP5	-1.071	1.51857e-05	9.91584e-05
IGLC2	-0.531442	1.51049e-05	9.91584e-05
C6orf62	-0.971826	1.50665e-05	9.91584e-05
UROD	-1.3015	1.45905e-05	9.68427e-05
IQCB1	-0.996911	1.41323e-05	9.43191e-05
WDR77	-1.47344	1.41279e-05	9.43191e-05
ZFAND2B	-0.972471	1.3958e-05	9.41971e-05
TFAP2C	-1.26477	1.39234e-05	9.41971e-05
TSPYL1	-1.08052	1.36347e-05	9.30548e-05
PRDX1	-0.780804	1.30906e-05	8.9849e-05
C15orf61	-1.13494	1.30276e-05	8.9849e-05
POLR1E	-1.59211	1.25476e-05	8.71124e-05
TMEM18	-1.09124	1.21974e-05	8.51702e-05
MRPL40	-0.699164	1.13288e-05	7.95649e-05
IFI27L2	-1.09187	1.09594e-05	7.74208e-05
PDCD4	-1.34454	1.02452e-05	7.2801e-05
SQLE	-0.907203	9.55893e-06	6.83265e-05
BCAM	-0.743315	9.0855e-06	6.53291e-05
AIMP2	-1.38687	8.50272e-06	6.15047e-05
PXMP2	-1.16269	7.90844e-06	5.75506e-05
BCAT2	-1.29446	7.78044e-06	5.69622e-05
MACF1	-1.18905	7.64344e-06	5.63005e-05
TRPS1	-2.09255	7.19136e-06	5.36245e-05
SAMHD1	-1.44693	7.08864e-06	5.31868e-05
C1orf52	-1.19097	7.04738e-06	5.31868e-05
ATF7IP	-1.2777	7.03386e-06	5.31868e-05
PEX13	-1.09577	6.53566e-06	4.99689e-05
NPC2	-0.747258	6.48498e-06	4.98972e-05
DGCR6L	-0.724839	6.01247e-06	4.65581e-05
TTLL4	-1.61784	5.89116e-06	4.5913e-05
PPID	-1.08445	5.81566e-06	4.56189e-05
TAPBPL	-1.40617	5.62911e-06	4.44442e-05
TFPT	-1.1364	5.07514e-06	4.0334e-05
LGMN	-0.931363	4.6525e-06	3.722e-05
TCEAL4	-0.891451	4.61139e-06	3.7137e-05
MRPS6	-0.725362	4.5643e-06	3.70045e-05
BNIP3	-0.70542	4.48794e-06	3.66313e-05
HLA-DMB	-2.39198	4.47661e-06	3.66313e-05
CFAP20	-1.12093	4.27694e-06	3.53873e-05
ZC3HAV1	-1.2266	4.25742e-06	3.53873e-05
SNX17	-1.14314	4.04953e-06	3.39711e-05
ARF4	-0.663858	3.99681e-06	3.37632e-05
TSSC4	-1.08037	3.98014e-06	3.37632e-05
TOB1	-0.856481	3.48665e-06	2.98714e-05
RPP30	-1.24863	3.35217e-06	2.89244e-05
MRPL32	-1.13	3.33286e-06	2.89244e-05
TRMT61B	-1.52017	3.11495e-06	2.72671e-05
FLYWCH2	-1.1805	2.86352e-06	2.52491e-05
APTX	-1.22573	2.69351e-06	2.39247e-05
ASCC3	-1.18917	2.59849e-06	2.32517e-05
GADD45G	-1.36649	2.41923e-06	2.18092e-05
RNF10	-0.978211	2.36896e-06	2.15166e-05
MTA3	-1.45019	2.25245e-06	2.06133e-05
TSC22D3	-0.873699	2.24641e-06	2.06133e-05
C2	-1.67886	2.09268e-06	1.94458e-05
NT5C3A	-0.811078	2.06661e-06	1.93525e-05
ADIPOR1	-0.763735	2.04688e-06	1.93174e-05
PCBP2	-0.732485	2.03674e-06	1.93174e-05
COX19	-1.21173	1.96178e-06	1.88082e-05
PTK7	-1.1404	1.91049e-06	1.8463e-05
PLEKHA4	-2.94751	1.85877e-06	1.8108e-05
TOR1AIP2	-0.889615	1.81084e-06	1.77845e-05
MACROD1	-1.49972	1.72201e-06	1.71917e-05
STK4	-1.54266	1.60189e-06	1.61257e-05
RPN1	-0.958661	1.56353e-06	1.58718e-05
RPL41	-0.892755	1.50361e-06	1.53929e-05
HYI	-1.24293	1.25866e-06	1.29954e-05
GBP3	-1.2335	1.17336e-06	1.22191e-05
TRIM38	-1.15811	1.12946e-06	1.18643e-05
VCAN	-2.2192	1.10368e-06	1.16951e-05
SMARCA2	-1.97009	1.06523e-06	1.13876e-05
RERG	-1.87215	1.05698e-06	1.13876e-05
LDHA	-0.829409	9.96383e-07	1.08435e-05
MAP1LC3A	-1.24665	9.9148e-07	1.08435e-05
MYB	-1.96554	9.84978e-07	1.08435e-05
TAP2	-1.39433	9.69911e-07	1.08435e-05
ALDH2	-0.950304	9.65384e-07	1.08435e-05
ENOPH1	-1.38823	9.4248e-07	1.07407e-05
PPP1R1B	-1.17295	9.31589e-07	1.07177e-05
RNASET2	-0.797001	8.98778e-07	1.04396e-05
PYGB	-1.29255	8.83291e-07	1.03594e-05
SOD2	-0.758543	8.80838e-07	1.03594e-05
KLF6	-0.829459	8.42311e-07	1.00744e-05
GOPC	-1.02221	8.31232e-07	1.00413e-05
SLC25A39	-0.737692	7.45166e-07	9.09253e-06
DCAF12	-1.06571	7.20914e-07	8.88637e-06
CLDN23	-1.9184	6.89154e-07	8.58246e-06
ETNK1	-1.29694	6.67776e-07	8.40285e-06
HES1	-0.96127	6.09713e-07	7.75298e-06
GBP4	-1.53758	5.51486e-07	7.08718e-06
SKIL	-0.902238	5.50852e-07	7.08718e-06
RABGAP1L	-1.28224	5.19449e-07	6.82059e-06
CCDC14	-1.5737	4.80637e-07	6.38033e-06
GBP1	-1.00868	4.51255e-07	6.05684e-06
ISOC1	-1.64617	4.4821e-07	6.05684e-06
RPP25L	-1.51841	4.1559e-07	5.70492e-06
IDO1	-1.41585	3.84233e-07	5.3351e-06
MTIF3	-0.949426	3.14924e-07	4.42358e-06
HIST2H2BE	-1.44674	3.01461e-07	4.2843e-06
LAP3	-1.44681	2.80394e-07	4.08091e-06
MT-ATP6	-0.840497	2.74836e-07	4.0488e-06
PHAX	-1.42883	2.59005e-07	3.86269e-06
SIX1	-1.42144	2.49126e-07	3.7618e-06
AQP5	-1.55459	2.17553e-07	3.32663e-06
SH3BGRL	-1.15688	1.89672e-07	2.93748e-06
TEAD2	-1.41642	1.71479e-07	2.69022e-06
EMP2	-0.901509	1.56374e-07	2.48552e-06
SNRNP40	-1.00632	1.46155e-07	2.35406e-06
VIM	-1.33563	1.26802e-07	2.06996e-06
CDKAL1	-1.5529	1.10723e-07	1.83224e-06
ZCCHC11	-1.51703	1.0545e-07	1.76922e-06
ZFP36L1	-0.87313	9.64712e-08	1.64137e-06
SYCP2	-2.23945	9.42695e-08	1.62682e-06
HIST1H2AC	-1.26316	8.68176e-08	1.51994e-06
RARRES1	-1.18403	8.62718e-08	1.51994e-06
FXYD3	-0.973782	7.12289e-08	1.28425e-06
EIF2B1	-1.83333	4.62707e-08	8.46894e-07
NQO1	-0.914302	4.02465e-08	7.47966e-07
HARS	-1.5552	3.90535e-08	7.37135e-07
IRF1	-1.07732	3.49825e-08	6.70776e-07
SERTAD1	-1.24987	3.42849e-08	6.68003e-07
MDM4	-1.47007	2.61189e-08	5.1724e-07
USP48	-1.5802	2.47181e-08	4.97658e-07
HNRNPH1	-0.837952	2.33789e-08	4.78673e-07
RND3	-0.996495	2.03606e-08	4.24062e-07
NSRP1	-1.07718	1.88439e-08	3.99359e-07
CMTM6	-1.06727	1.77028e-08	3.81875e-07
DEDD2	-1.92417	1.66701e-08	3.66136e-07
EGR1	-1.13958	1.43648e-08	3.21346e-07
LSR	-1.09795	8.20537e-09	1.87021e-07
MAFB	-2.24231	7.01663e-09	1.63002e-07
SMPDL3A	-1.31761	3.97451e-09	9.41412e-08
HMGB3	-0.991794	3.95125e-09	9.41412e-08
MT1X	-0.974486	3.63021e-09	8.94958e-08
ENO1	-0.863156	3.61749e-09	8.94958e-08
CYBA	-0.955299	3.46967e-09	8.91779e-08
HERPUD1	-1.34485	2.10914e-09	5.53878e-08
VASP	-1.24521	1.35498e-09	3.63738e-08
PDIA4	-1.10589	1.12234e-09	3.08134e-08
DDIT3	-1.25638	9.3769e-10	2.63425e-08
TMCO1	-0.94585	8.95844e-10	2.57662e-08
TMEM106C	-1.09901	2.46796e-10	7.27145e-09
PRCC	-1.35904	1.70793e-10	5.15796e-09
CTNNB1	-1.07595	1.03938e-10	3.21942e-09
SDF2L1	-1.2848	5.12849e-11	1.63032e-09
TPM1	-1.10798	2.49e-11	8.12953e-10
ID2	-1.35892	1.96997e-11	6.79922e-10
GSN	-1.10605	1.84595e-11	6.55856e-10
HSPH1	-1.5415	1.84358e-11	6.55856e-10
MARCKS	-1.22535	1.59312e-11	6.01402e-10
LSM1	-1.17393	1.34441e-11	5.23887e-10
GBP2	-1.37718	5.90539e-12	2.3779e-10
CDC42SE1	-1.32183	3.51891e-12	1.46581e-10
NUPR1	-1.20685	1.87898e-12	8.10646e-11
IFI44L	-1.53684	1.4693e-12	6.57375e-11
RBP1	-1.38967	1.16388e-12	5.40756e-11
SLC25A37	-1.4279	9.16454e-13	4.4283e-11
HIST1H2BG	-1.86031	8.03716e-13	4.04537e-11
XIST	-2.28397	6.8515e-13	3.59853e-11
WTAP	-1.32336	1.45386e-13	7.98302e-12
BRD2	-1.42865	2.65075e-14	1.52481e-12
PRELID3B	-1.22262	1.16612e-14	7.04336e-13
NUTF2	-1.51415	1.14115e-14	7.04336e-13
PNISR	-1.45881	8.77247e-15	5.8873e-13
NCOA7	-1.30897	4.77877e-15	3.39574e-13
TUBB	-1.278	3.95688e-15	2.98744e-13
HSPA1A	-1.27196	3.19779e-15	2.57529e-13
BTG2	-1.86273	1.30695e-15	1.12771e-13
PARP14	-1.84513	3.13114e-16	2.90955e-14
PFN1	-1.40166	2.33701e-17	2.35259e-15
HLA-DMA	-1.72681	2.20575e-17	2.35259e-15
HSPA1B	-1.40996	1.68384e-17	2.03408e-15
WFDC2	-1.61175	8.53539e-18	1.14564e-15
HLA-A	-1.4336	1.0398e-18	1.5701e-16
IFI6	-1.63638	3.86678e-21	6.67295e-19
CXCR4	-1.85392	3.06785e-21	6.1766e-19
TUBA1A	-1.82085	4.37157e-27	1.05617e-24
HLA-DRB1	-1.76508	1.77257e-27	5.35317e-25
JUN	-1.88104	9.62486e-31	3.87561e-28
HLA-B	-1.9748	6.15522e-37	3.71776e-34
CD74	-2.13028	3.52035e-45	4.25258e-42

## Sheet: 6. scAB Differential Genes
Gene	logfoldchanges	pvals	pvals_adj
ENO1	1.29538	2.24514e-34	2.71213e-31
HLA-B	1.34191	3.13454e-33	1.89326e-30
MT-ATP6	0.932799	4.22593e-26	1.70164e-23
CD74	1.19204	1.2339e-21	3.72637e-19
HLA-DRB1	1.13596	9.82699e-19	2.3742e-16
HLA-A	0.923163	6.63773e-17	1.3364e-14
HLA-DMA	1.04793	7.83396e-15	1.35192e-12
HIST1H2BG	1.20484	6.67972e-14	1.00864e-11
CXCR4	1.02766	1.77555e-13	2.38319e-11
CYBA	0.939966	2.57764e-13	3.11379e-11
PNISR	0.988209	3.4061e-13	3.74052e-11
BNIP3	1.02006	6.82773e-13	6.87324e-11
SDF2L1	0.958001	4.47851e-12	4.16157e-10
EMP2	0.937466	4.53615e-11	3.91405e-09
SMPDL3A	0.908161	7.01113e-10	5.37338e-08
WTAP	0.810486	7.11706e-10	5.37338e-08
TUBA1A	0.892224	3.21285e-09	2.27372e-07
TMCO1	0.71233	3.388e-09	2.27372e-07
SLC25A37	0.825109	4.31399e-09	2.74279e-07
LGMN	0.854272	4.62489e-09	2.79343e-07
ID2	0.824063	6.216e-09	3.57568e-07
GOPC	0.828791	6.71979e-09	3.68978e-07
NCOA7	0.748011	8.24675e-09	4.33133e-07
PARP14	0.788514	9.90286e-09	4.65985e-07
CD55	0.799529	1.00235e-08	4.65985e-07
ALDH2	0.776581	1.00295e-08	4.65985e-07
VIM	0.914531	1.11597e-08	4.98403e-07
LDHA	0.700596	1.16155e-08	4.98403e-07
RBP1	0.85754	1.1965e-08	4.98403e-07
PPIC	0.793585	1.32036e-08	5.31664e-07
TMEM223	0.934319	1.6448e-08	6.40943e-07
RNASET2	0.704723	2.63177e-08	9.93492e-07
GBP2	0.822425	2.73063e-08	9.99576e-07
SQLE	0.881966	3.6693e-08	1.28956e-06
SKIL	0.825242	3.73631e-08	1.28956e-06
NQO1	0.690584	4.14106e-08	1.38955e-06
TMEM106C	0.696294	5.40201e-08	1.73008e-06
BTG2	0.770837	5.44231e-08	1.73008e-06
HARS	0.937989	7.75037e-08	2.40063e-06
HIST1H2AC	0.907636	9.82209e-08	2.96627e-06
ADIPOR1	0.667761	1.43837e-07	4.23794e-06
HIST1H1C	0.778889	1.51128e-07	4.34674e-06
HSPA1B	0.716067	2.02935e-07	5.70107e-06
CA9	1.09166	2.12686e-07	5.83921e-06
NDUFA4L2	1.18513	2.3957e-07	6.43113e-06
BCAM	0.702889	2.53151e-07	6.64797e-06
HERPUD1	0.783681	2.92521e-07	7.51841e-06
HES1	0.7397	3.91509e-07	9.85298e-06
ZFP36L1	0.647214	4.10488e-07	1.01198e-05
PHAX	0.858861	4.42295e-07	1.06858e-05
SOD2	0.617476	5.85415e-07	1.38663e-05
PTGR1	0.628833	6.08503e-07	1.4136e-05
DGCR6L	0.630192	6.72772e-07	1.51442e-05
PPP1R1B	0.797822	6.76976e-07	1.51442e-05
RPN1	0.686547	7.39231e-07	1.62268e-05
TMEM97	0.805732	7.54479e-07	1.62268e-05
PTK7	0.747274	7.65669e-07	1.62268e-05
XIST	0.935098	8.20205e-07	1.70829e-05
RFC4	0.88675	8.97608e-07	1.83781e-05
IRF1	0.731335	9.47714e-07	1.90806e-05
JUN	0.700322	1.01647e-06	1.95524e-05
MAP1LC3B	0.574779	1.01842e-06	1.95524e-05
WDR18	0.832686	1.01971e-06	1.95524e-05
EMC2	0.754298	1.08456e-06	2.0471e-05
IFI44L	0.680146	1.10637e-06	2.05614e-05
TRIM38	0.79922	1.16044e-06	2.12395e-05
BCAT2	0.85697	1.19376e-06	2.15233e-05
NUPR1	0.640246	1.24561e-06	2.21278e-05
MCRS1	0.814734	1.46544e-06	2.56557e-05
PEX13	0.782644	1.60724e-06	2.77364e-05
BRD2	0.590762	1.73862e-06	2.9581e-05
HLA-F	0.812456	1.94796e-06	3.26824e-05
ZFAND2B	0.756056	2.12693e-06	3.51964e-05
C1R	0.935103	2.18014e-06	3.55894e-05
TPM1	0.610043	2.47566e-06	3.98746e-05
IGHA1	0.584518	3.01776e-06	4.79664e-05
TCEAL4	0.636819	3.52862e-06	5.53581e-05
RABGAP1L	0.758022	3.88659e-06	6.01922e-05
RND3	0.610518	4.28909e-06	6.55851e-05
SUMF2	0.663651	4.60435e-06	6.95235e-05
ECE1	0.872818	4.66176e-06	6.95235e-05
HLA-DQB1	0.824615	4.87933e-06	7.09682e-05
PLOD2	0.919361	4.8997e-06	7.09682e-05
TMEM33	0.789378	4.93488e-06	7.09682e-05
MARCKS	0.590917	5.34473e-06	7.5958e-05
TMA16	0.690244	5.44624e-06	7.65007e-05
TOR1AIP2	0.650425	5.68378e-06	7.7584e-05
COX19	0.761397	5.71446e-06	7.7584e-05
MED13L	0.962176	5.71604e-06	7.7584e-05
YDJC	0.704228	6.09098e-06	8.17544e-05
ZCCHC11	0.755789	6.37195e-06	8.45859e-05
TFPT	0.84308	6.68819e-06	8.78188e-05
HNRNPH1	0.524914	7.26241e-06	9.43332e-05
NSRP1	0.562298	7.75956e-06	9.94648e-05
CDKAL1	0.856618	7.82215e-06	9.94648e-05
IGBP1	0.827713	8.11643e-06	0.000102132
AIMP2	0.815059	8.2297e-06	0.000102489
FXYD3	0.57897	8.48665e-06	0.000104611
NQO2	0.749188	8.85858e-06	0.000108093
PPID	0.763889	9.27671e-06	0.000112063
TAPBPL	0.809602	9.41049e-06	0.000112319
PRDX1	0.650117	9.57642e-06	0.000112319
SCFD1	0.767503	9.58676e-06	0.000112319
HSPH1	0.615433	9.66988e-06	0.000112319
MITD1	0.745111	1.01347e-05	0.000116597
CTSH	0.722572	1.08959e-05	0.000124172
LSR	0.546993	1.16584e-05	0.00013162
NFATC3	0.835682	1.17869e-05	0.000131838
PTP4A2	0.592094	1.2504e-05	0.000138577
IFNGR1	0.78041	1.39658e-05	0.00015337
EIF3B	0.765471	1.41063e-05	0.000153517
ARF4	0.532509	1.44966e-05	0.000154746
CDC42SE1	0.50954	1.45514e-05	0.000154746
NUTF2	0.527016	1.46035e-05	0.000154746
HSPA1A	0.608391	1.54137e-05	0.000161911
STX6	0.735134	1.56165e-05	0.000162627
HIST2H2BE	0.738091	1.59148e-05	0.00016358
POR	0.841886	1.60634e-05	0.00016358
MRPL32	0.7013	1.61143e-05	0.00016358
TMEM101	0.689037	1.64455e-05	0.000165551
NT5C3A	0.562796	1.7105e-05	0.000170767
ASCC3	0.768038	1.73675e-05	0.000171967
WARS	0.63266	1.79548e-05	0.000176336
KRTCAP3	0.51386	1.81013e-05	0.000176341
ATP6V1D	0.570027	1.86559e-05	0.000180291
SH3BGRL	0.678204	1.90155e-05	0.000182308
CTDSP1	0.803381	1.95075e-05	0.000185551
TMED3	0.635504	2.12786e-05	0.000200817
TLK1	0.692522	2.14829e-05	0.000201173
C6orf62	0.6018	2.20468e-05	0.000204866
C9orf3	0.678226	2.22812e-05	0.000205463
CCNDBP1	0.735886	2.2834e-05	0.000208965
FASN	0.912653	2.4551e-05	0.000222989
C15orf40	0.954058	2.51296e-05	0.000226541
SERTAD1	0.58986	2.75462e-05	0.000245493
LSM1	0.49141	2.76383e-05	0.000245493
TRA2A	0.683896	2.79505e-05	0.000246454
CMC2	0.650325	2.84441e-05	0.000248989
HYI	0.733134	2.90965e-05	0.000252868
EMC6	0.512351	3.01269e-05	0.000259952
PYGB	0.638236	3.09955e-05	0.00026555
MRPL40	0.474881	3.17884e-05	0.000270425
DCAF12	0.610289	3.88234e-05	0.000327963
DDIT3	0.549946	4.00291e-05	0.000335712
LRPAP1	0.609356	4.06849e-05	0.000335712
TEAD2	0.668511	4.06952e-05	0.000335712
GTF2E2	0.757123	4.112e-05	0.000335712
NTMT1	0.666165	4.13171e-05	0.000335712
CYB5R1	0.711357	4.14081e-05	0.000335712
VASP	0.556505	4.35068e-05	0.000350375
EIF2B1	0.755298	4.46761e-05	0.000357409
CDH1	0.666775	4.50499e-05	0.000358028
TSSC4	0.586523	4.70195e-05	0.000371093
MAFB	0.87378	4.73082e-05	0.000371093
MAP2K3	0.734637	4.81276e-05	0.000371302
SLC25A39	0.495262	4.8254e-05	0.000371302
EIF2B5	0.709952	4.8257e-05	0.000371302
HPCAL1	0.616507	4.9322e-05	0.000377095
CEP70	0.824726	5.22093e-05	0.000396659
CLIP1	0.699132	5.32277e-05	0.000398315
PDIA4	0.532976	5.34164e-05	0.000398315
ILKAP	0.658389	5.42885e-05	0.000402335
C2orf68	0.889457	5.80966e-05	0.000426206
UROD	0.653325	5.82152e-05	0.000426206
MDM4	0.680909	6.0371e-05	0.000439327
SNX17	0.652282	6.10072e-05	0.000439772
ETNK1	0.703453	6.14449e-05	0.000439772
B3GAT3	0.673432	6.15245e-05	0.000439772
AGRN	0.577408	6.20612e-05	0.000440999
TMEM18	0.748472	6.3214e-05	0.000446564
CDC27	0.60541	6.73506e-05	0.000473021
SYCP2	0.90818	6.88783e-05	0.000480953
BPNT1	0.828659	6.94075e-05	0.000481863
LRIG3	1.13096	7.1053e-05	0.000490469
IL13RA1	0.658346	7.85304e-05	0.000539004
CTSS	0.606637	7.92594e-05	0.000540934
SIX1	0.634018	8.45038e-05	0.000571596
ADPGK	0.833051	8.46985e-05	0.000571596
IQCB1	0.653287	9.07841e-05	0.000609263
PTRH2	0.799178	9.25583e-05	0.000617737
WRAP73	0.724592	9.39797e-05	0.000623777
SIKE1	0.726344	9.5135e-05	0.000627995
MTIF3	0.515627	9.73631e-05	0.00063921
APOL1	0.769963	9.89015e-05	0.000642907
BLOC1S2	0.657611	9.89906e-05	0.000642907
AQP5	0.796512	0.000103098	0.000666004
PSME4	0.816203	0.000106338	0.000683279
TM7SF3	0.658961	0.000108107	0.000690969
SURF2	0.79652	0.000109726	0.000695136
STK4	0.75632	0.00010991	0.000695136
MAP1LC3A	0.630143	0.000117089	0.000733654
C15orf61	0.666883	0.00011743	0.000733654
ARID5A	0.87248	0.000117822	0.000733654
HSD17B12	0.642737	0.000118665	0.000735116
EGR1	0.508387	0.000126508	0.000779704
MBNL1	0.562434	0.00013244	0.000812122
CLDN23	0.812333	0.000134029	0.000817713
CAMK1D	0.811801	0.000136792	0.000830376
DENND1B	0.879246	0.00014192	0.000857194
R3HDM2	0.669394	0.000143354	0.000861549
C12orf76	0.805595	0.00014527	0.000868744
WDR13	0.904754	0.000146272	0.000869264
ARSD	0.852733	0.000146796	0.000869264
TAP2	0.620701	0.000149097	0.000876428
GADD45G	0.655183	0.000150396	0.000876428
UBE2T	0.441457	0.000150493	0.000876428
SRFBP1	0.792498	0.000150908	0.000876428
GBP4	0.702979	0.000156285	0.000903311
RERG	0.832177	0.000160787	0.000924907
BPHL	0.607122	0.000162618	0.000930352
YIPF5	0.641908	0.000163274	0.000930352
NDUFAF2	0.753314	0.000169103	0.000959045
WDR77	0.758758	0.000170239	0.000960974
WWTR1	0.742101	0.000180588	0.00101465
MACF1	0.595613	0.000181648	0.00101589
SETD5	0.603468	0.000182747	0.00101732
CRELD2	0.66808	0.000187159	0.0010371
GBP1	0.565203	0.000189808	0.00104697
VRK2	0.689083	0.00019466	0.00106886
MIIP	0.637481	0.000199825	0.00109226
APTX	0.630898	0.000207301	0.00112801
SDC4	0.476138	0.00021041	0.00113471
SUCLG2	0.580074	0.000214878	0.00115366
GABARAPL1	0.703154	0.000217619	0.0011632
ENOPH1	0.623924	0.000226248	0.00120249
PRIM1	0.803206	0.000226961	0.00120249
FAM207A	0.619038	0.000233152	0.0012263
PDCD2L	0.796708	0.000234339	0.0012263
ERGIC1	0.611191	0.0002345	0.0012263
EMC8	0.687782	0.000236799	0.00123299
AGPAT5	0.737272	0.000249054	0.00129123
TMED5	0.800221	0.000255823	0.00132066
PJA2	0.688822	0.000259978	0.0013364
GBP3	0.655563	0.00027484	0.00140681
PRCC	0.46329	0.000276397	0.00140881
ORC3	0.715482	0.000283348	0.00143817
SEMA3C	0.884149	0.000288603	0.00145872
USP10	0.777692	0.000303982	0.00152721
UBXN7	0.697633	0.000304683	0.00152721
CDC42SE2	0.69008	0.000313507	0.00156494
NIPA2	0.736061	0.000317075	0.001574
RPP25L	0.619908	0.000318945	0.001574
GTF3C3	0.79927	0.000319231	0.001574
ARHGDIB	0.518813	0.000328559	0.00161341
USP48	0.568118	0.000332398	0.00162566
PBRM1	0.552389	0.000335792	0.00163563
MTA3	0.537316	0.000350142	0.00169868
HLA-DMB	0.78854	0.000353037	0.00170173
CKAP4	0.749774	0.000353587	0.00170173
UCHL5	0.641911	0.000357183	0.00171221
LAMB3	0.443842	0.000359692	0.00171742
GADD45A	0.501167	0.000368646	0.00175325
SMAGP	0.524882	0.000373087	0.00176174
PRKCI	0.498102	0.000373811	0.00176174
CALD1	0.669471	0.000374807	0.00176174
ATAD1	0.691142	0.000378562	0.00177249
TOB1	0.479382	0.000386798	0.00180406
TRMT61B	0.732471	0.00039073	0.00181539
DR1	0.678652	0.000397717	0.00184078
THUMPD3-AS1	0.585647	0.000424909	0.00195747
DCP1A	0.778935	0.000426172	0.00195747
MYB	0.71108	0.00042786	0.00195779
CTNNB1	0.422705	0.000443708	0.00201503
PPP3CA	0.708949	0.000447442	0.00202438
IFI27L2	0.543826	0.000449676	0.0020269
RPP30	0.614576	0.000461814	0.00206849
SNAP29	0.433878	0.000462521	0.00206849
ETV6	0.792741	0.00046404	0.00206849
FBXO22	0.683494	0.000465945	0.00206934
PDPK1	0.712521	0.000468649	0.00207373
SLC25A1	0.592693	0.00047418	0.00209054
CYP20A1	0.563627	0.0004781	0.00209472
CFAP20	0.531892	0.000478595	0.00209472
TFAP2C	0.689968	0.000490284	0.00213813
SBDS	0.414496	0.000500141	0.00217327
CD81	0.538014	0.000517598	0.00224107
FOXP1	0.502033	0.000522843	0.00225569
PPP1CB	0.492756	0.000536956	0.00230834
SLC18B1	0.820943	0.000544087	0.00232447
ZMAT5	0.648632	0.000544557	0.00232447
VCAN	0.91358	0.000562057	0.00239072
NUP155	0.61848	0.000574797	0.00243633
RFK	0.621301	0.000577495	0.00243805
SLC44A1	0.529849	0.000579238	0.00243805
EEA1	0.798845	0.000588311	0.00246764
DCAF11	0.621559	0.000624169	0.00260898
ISOC1	0.614403	0.000650395	0.00270728
FBP1	0.572816	0.000652167	0.00270728
GPR108	0.545276	0.000656111	0.00271432
DSC2	0.626311	0.000675015	0.00278299
SLC30A7	0.765141	0.000688909	0.00281808
TRAF7	0.554267	0.000690522	0.00281808
SPCS3	0.51617	0.000699495	0.00284006
CCDC14	0.57958	0.00070061	0.00284006
SLC12A2	0.984515	0.000710345	0.00286427
HIST1H2AE	0.750319	0.000711325	0.00286427
DNAJA2	0.487146	0.000714236	0.00286643
IGHG1	0.796869	0.000720014	0.00288006
HMGB2	0.402169	0.00072884	0.00290124
RECQL	0.639344	0.000734961	0.00291093
FAM96A	0.529387	0.000762498	0.00301012
UBL4A	0.533888	0.000770708	0.00303262
IFT43	0.532894	0.000785264	0.00307987
FLYWCH2	0.392526	0.000789701	0.00308724
GOLT1B	0.434887	0.000815871	0.00317504
MAPK1IP1L	0.489411	0.000817415	0.00317504
YEATS4	0.521975	0.00084311	0.00326435
TRPT1	0.663907	0.000854311	0.00329474
NFKBIA	0.414556	0.000856415	0.00329474
RHOV	0.499469	0.000878596	0.00336935
SAMHD1	0.62913	0.00088269	0.00337434
CCND3	0.452584	0.000897744	0.00342105
UGDH	0.482565	0.000919764	0.00349395
MEF2A	0.861092	0.000954999	0.00361642
PRELID3B	0.363574	0.000964463	0.00364085
RBM6	0.594592	0.000970435	0.00365198
MKNK1	0.787544	0.00097634	0.00366279
SPTBN1	0.563304	0.00098401	0.00368014
XRCC4	0.668261	0.000999622	0.00372699
TSPYL1	0.543539	0.0010349	0.00384663
MAGT1	0.823453	0.00104849	0.00387532
SHPRH	0.683191	0.00104903	0.00387532
UBA3	0.510961	0.00106851	0.00393524
CORO1C	0.562066	0.00108781	0.00399416
PCGF5	0.643094	0.00109258	0.0039995
HCCS	0.867212	0.00110137	0.00401951
SLFN5	0.637889	0.00110517	0.00402122
LAP3	0.538803	0.00112278	0.00406542
ISG20	0.328997	0.00112405	0.00406542
ISCA2	0.549572	0.00114686	0.00413555
MED28	0.448637	0.0011655	0.00419027
APOL2	0.597914	0.0011737	0.00420721
C6orf203	0.83918	0.00118189	0.00422402
SMIM4	0.670757	0.00119964	0.00427484
CMTM6	0.401429	0.00121982	0.00433396
RTKN	0.733761	0.00125039	0.00442954
LTF	0.706619	0.00126742	0.00447674
TUBB	0.561186	0.00129455	0.00455923
LMCD1	0.889685	0.00130041	0.00456655
UTP23	0.703303	0.00131333	0.00457814
CBR1	0.595795	0.0013154	0.00457814
MT1X	0.36312	0.00131573	0.00457814
BTN3A2	0.717424	0.00131887	0.00457814
DEFB1	0.415689	0.00135015	0.00467329
RNASEH2C	0.389654	0.00136491	0.00469983
PABPN1	0.46146	0.0013656	0.00469983
PUS1	0.945615	0.00139536	0.00478862
PCBP2	0.43535	0.001424	0.00487306
RPA1	0.582611	0.00143155	0.00488506
CALU	0.39816	0.00144567	0.00491934
NUDT15	0.706909	0.00146263	0.00496309
IFI6	0.551935	0.00146963	0.00497288
OAT	0.412898	0.00150782	0.00508784
TYW3	0.563874	0.00151532	0.00509891
TFRC	0.651561	0.00152187	0.00510671
CHMP1B	0.353394	0.00153196	0.00510987
PTPMT1	0.494131	0.00153534	0.00510987
LDLR	0.744341	0.0015355	0.00510987
PPP2CB	0.660583	0.00154444	0.00511556
CHTF8	0.593641	0.00154568	0.00511556
USE1	0.545691	0.00155802	0.00514233
GALE	0.525495	0.00157486	0.00518374
SNX1	0.665225	0.00161935	0.00530127
PCF11	0.672445	0.001648	0.00536678
ACTR1A	0.531995	0.0016517	0.00536678
SMAD2	0.493034	0.00165268	0.00536678
C1S	0.757427	0.00166739	0.00540002
TSR2	0.573396	0.00168313	0.00543644
YPEL2	0.619868	0.00169169	0.00544949
PMEPA1	0.413323	0.00171546	0.00549676
BDH2	0.653733	0.00171546	0.00549676
IMMP1L	0.509344	0.0017234	0.00550758
CTHRC1	0.513961	0.00175114	0.00558145
MFN1	0.672966	0.0017594	0.00559303
DEDD2	0.498371	0.00177541	0.00562913
ATF7IP	0.524666	0.00178422	0.00564224
DPYSL2	0.615185	0.00179742	0.00565578
COX11	0.48236	0.00179786	0.00565578
SLC25A24	0.566868	0.00181554	0.00569657
TSPAN12	0.733986	0.00188788	0.00590819
GLRX	0.558708	0.00195324	0.0060887
RAB5B	0.502875	0.00195564	0.0060887
CXCL16	0.459923	0.00197523	0.00613387
LAMP1	0.572102	0.0019948	0.00617876
TOR1A	0.688675	0.00203019	0.00627232
MTFR1L	0.720721	0.002058	0.006342
STEAP3	0.742555	0.00207954	0.00639207
EFR3A	0.6052	0.00215368	0.00660317
BLOC1S6	0.650703	0.00216874	0.00663249
SNRNP35	0.423372	0.00219945	0.00670944
PDXK	0.504596	0.00220985	0.00672418
SLC38A10	0.58398	0.00222721	0.00675998
STAT2	0.468465	0.00229891	0.00695886
RNF149	0.365168	0.00230426	0.00695886
HILPDA	0.523798	0.002325	0.00700398
CCDC174	0.699475	0.00237914	0.00714926
EDEM2	0.57398	0.00241817	0.00724851
ARL6IP1	0.331415	0.00243984	0.00727309
SNAPC5	0.468561	0.00244396	0.00727309
THUMPD3	0.576939	0.00244443	0.00727309
RPS6KB2	0.436808	0.00246549	0.00731703
STX8	0.501991	0.00247132	0.00731703
CEACAM1	0.604934	0.002552	0.00752196
BRWD1	0.677333	0.00255298	0.00752196
PEX10	0.697816	0.00256306	0.00752653
C6orf132	0.600913	0.002567	0.00752653
CTSB	0.339531	0.00257675	0.00753683
B4GALT1	0.39214	0.00260933	0.0076137
ECE2	0.518433	0.00265332	0.00771
ASS1	0.483664	0.00267397	0.00774356
CBY1	0.520162	0.00267948	0.00774356
SLC4A1AP	0.690694	0.00269618	0.00777325
NFU1	0.556125	0.00271091	0.0077971
KATNA1	0.589531	0.00272819	0.00782816
TRIP6	0.709139	0.0027537	0.00788264
CCDC25	0.473237	0.00276068	0.00788392
MPDU1	0.520992	0.00278487	0.00793259
TMEM183A	0.466706	0.00279085	0.00793259
INTS1	0.819412	0.00283048	0.00802634
FLNA	0.402512	0.00285822	0.00808603
SOAT1	0.645723	0.00291432	0.00822547
ITFG1	0.53482	0.00293849	0.00827435
ZC3HAV1	0.456767	0.00312581	0.00878135
TTC17	0.611054	0.00317738	0.00890551
VLDLR	0.757752	0.00320896	0.00897321
DCUN1D5	0.423901	0.00324038	0.00904012
TSC22D3	0.346373	0.00331165	0.00921769
RBM26	0.70669	0.00332349	0.00922937
PKIG	0.734048	0.00344157	0.00953535
SLPI	0.324498	0.0035231	0.00973892
DTYMK	0.3331	0.00353843	0.00975896
PXMP2	0.473672	0.0035908	0.00987493
MRAS	0.767337	0.00359683	0.00987493
PLEKHO1	0.779344	0.00363354	0.0099531
CENPW	0.388267	0.00366308	0.0100113
RNF10	0.373462	0.00370316	0.010098
ARMT1	0.460131	0.00379664	0.0103296
THUMPD2	0.61511	0.00383041	0.0103981
STK3	0.476031	0.00390778	0.0105843
GLMP	0.50124	0.00397518	0.0107428
PGGT1B	0.655025	0.00403394	0.0108772
TNFRSF14	0.590634	0.00413726	0.011131
TRAPPC4	0.468951	0.00414907	0.011138
COPG1	0.609279	0.00416207	0.0111481
TTLL4	0.593982	0.00428188	0.0114194
DDX23	0.530693	0.00428227	0.0114194
INSR	0.544361	0.00431538	0.0114823
IDO1	0.511645	0.00439616	0.0116412
FABP5	0.473069	0.00440038	0.0116412
BET1	0.452414	0.00440401	0.0116412
MRPS31	0.638192	0.00443756	0.0117043
SPPL2A	0.523323	0.00445931	0.0117361
BCKDK	0.465781	0.00454625	0.0119389
NUDT22	0.429064	0.00457682	0.0119931
UCK2	0.52813	0.00461304	0.0120618
WSB2	0.584252	0.0046244	0.0120654
PCYT1A	0.634905	0.00464148	0.0120839
ELK4	0.616664	0.00479239	0.0124499
HSCB	0.521346	0.00482445	0.0124914
ANXA3	0.540534	0.00482905	0.0124914
SPG7	0.585104	0.00496386	0.0128127
INSIG2	0.471724	0.00499334	0.0128613
POLR1E	0.672373	0.00506513	0.0130185
SLC12A7	0.540833	0.00509217	0.0130602
ABCD3	0.678296	0.00510874	0.0130749
STX16	0.56382	0.00518389	0.01323
DPM2	0.350912	0.00519136	0.01323
KIT	0.637634	0.00521268	0.01323
CDH3	0.611435	0.00521315	0.01323
NOTCH3	0.680956	0.00524397	0.0132803
C1GALT1	0.623699	0.00525696	0.0132854
RAB30-AS1	0.407496	0.00535567	0.0135066
APOL4	0.682488	0.00541269	0.0136219
MACROD1	0.525051	0.00544336	0.0136706
ZNF800	0.675718	0.00549211	0.0137645
MRS2	0.565108	0.00551478	0.0137927
EGLN3	0.728409	0.00554448	0.0138383
DST	0.715013	0.00558181	0.0139027
MIB2	0.654836	0.00562841	0.01399
IGHG3	0.481512	0.00564957	0.0140137
TAOK3	0.486362	0.00571144	0.0141382
IRAK1	0.546874	0.00575209	0.0142097
NSUN6	0.624808	0.00576724	0.014218
ZCCHC10	0.48258	0.00580074	0.0142715
SART1	0.455888	0.00584196	0.0143178
MIS18BP1	0.457545	0.00584326	0.0143178
CDK2AP2	0.335997	0.00586489	0.0143417
IGLC2	0.268253	0.0059389	0.0144933
PLEKHA4	0.672751	0.0059741	0.0145498
BACE2	0.556555	0.00602819	0.0146263
C1orf52	0.469925	0.00603328	0.0146263
ACACA	0.627674	0.00605392	0.0146263
ADNP	0.521264	0.00613552	0.0147513
TBK1	0.756906	0.00614232	0.0147513
SMG7	0.458543	0.00621343	0.0148925
XPR1	0.682855	0.00626281	0.0149811
HMGCS1	0.628105	0.00633406	0.0151216
IGLC3	0.274003	0.00637445	0.0151802
SLF1	0.509996	0.00638374	0.0151802
DIAPH1	0.595395	0.00641112	0.015205
XIAP	0.562402	0.00641932	0.015205
WDR72	0.680537	0.00653289	0.0154437
TOP2B	0.551358	0.00656056	0.0154507
COL1A1	0.584043	0.00656142	0.0154507
RIT1	0.343367	0.00674857	0.0158605
APOL3	0.689096	0.00680236	0.0159558
FNBP1	0.775577	0.00687157	0.0160869
MSRB1	0.349718	0.00691806	0.0161644
ANAPC10	0.510371	0.00695114	0.0162104
BCL2L13	0.489285	0.00699444	0.0162799
NFKBIZ	0.527421	0.00709292	0.0164774
BCL7B	0.626633	0.00711618	0.0164818
TDP2	0.441152	0.0071283	0.0164818
FAM111B	0.584695	0.00713577	0.0164818
GBE1	0.811266	0.00718762	0.0165699
RHOT1	0.455372	0.00740808	0.017013
TMEM189	0.500299	0.00741871	0.017013
PEMT	0.590598	0.00742774	0.017013
PTPRK	0.582869	0.00743614	0.017013
FAIM	0.634079	0.00759597	0.0173458
MOSPD3	0.535868	0.00763558	0.0174034
KIF9	0.524245	0.00772203	0.0175673
C12orf43	0.701783	0.00781409	0.0177433
SP140L	0.507933	0.00784556	0.0177813
GGH	0.495647	0.0078649	0.0177861
BIK	0.453254	0.00787714	0.0177861
C1orf56	0.381539	0.00790235	0.0178098
NUBP1	0.673256	0.00796467	0.0179168
FMR1	0.541136	0.00809027	0.0181655
G6PD	0.432441	0.00814549	0.0182556
CHMP4C	0.58236	0.00838414	0.0187098
PRPS2	0.451475	0.00838738	0.0187098
THAP7	0.394325	0.0084007	0.0187098
PRR7	0.719059	0.00841513	0.0187098
BCL7A	0.463454	0.0084256	0.0187098
GTPBP8	0.744623	0.00846761	0.0187686
RPE	0.397579	0.00875796	0.0193766
NAA60	0.61015	0.00885456	0.0195246
SGMS1	0.535875	0.00885721	0.0195246
CKS2	0.275701	0.00890911	0.01957
DNAJC12	0.633041	0.0089323	0.01957
RIN2	0.555274	0.00893839	0.01957
NR2C2AP	0.517425	0.00894259	0.01957
PNPLA2	0.333557	0.00899685	0.0196531
IRF2BPL	0.427882	0.00910819	0.0198604
ST20	0.655313	0.00922977	0.0200893
JKAMP	0.554199	0.00930412	0.0202147
CCDC88C	0.693758	0.00940727	0.0204021
XRN1	0.459643	0.00943922	0.0204347
C1orf198	0.39775	0.00947206	0.0204551
CETN3	0.349604	0.0094825	0.0204551
TNKS2	0.682527	0.00958336	0.0205773
GBP5	0.509102	0.00958417	0.0205773
PLP2	0.263975	0.00959025	0.0205773
P4HA1	0.352268	0.00965086	0.0206706
STK16	0.524354	0.00974344	0.020832
SAT1	0.277428	0.00978466	0.0208832
SCYL2	0.49807	0.0101056	0.0215156
NINJ2	0.546937	0.0101166	0.0215156
ASNSD1	0.462001	0.0101716	0.0215946
EZH2	0.477608	0.0106837	0.022642
TRPS1	0.577265	0.0107563	0.0227559
TUBE1	0.598928	0.010804	0.0228168
MTERF3	0.602908	0.0109528	0.0230852
SLC20A1	0.530926	0.0109693	0.0230852
C2	0.547986	0.0112935	0.0237261
CCL4	0.502014	0.0113414	0.0237854
SERPINB4	0.684923	0.0113664	0.0237965
PDLIM5	0.50343	0.0116613	0.0243717
SREBF1	0.755828	0.0116869	0.0243831
GOT2	0.569982	0.0117689	0.0245118
ZNF770	0.523239	0.0120507	0.0250554
SLC40A1	0.532464	0.0120731	0.0250588
LRRC58	0.591194	0.0121039	0.0250799
WBP4	0.480962	0.012182	0.0251984
PLBD1	0.605471	0.0122287	0.0252518
FKBP7	0.61936	0.0123669	0.0254935
DNAJC15	0.272514	0.0123928	0.0255034
PPP2R5E	0.450746	0.0124725	0.0256238
CENPH	0.479968	0.0124961	0.0256287
TMEM245	0.511321	0.0126038	0.0257905
SOS1	0.749662	0.0126177	0.0257905
RANGRF	0.60217	0.0126862	0.0258867
ANKRD17	0.591034	0.0127394	0.0259183
BARD1	0.398659	0.0127446	0.0259183
NCK1	0.358904	0.0128747	0.0260651
SYNGR2	0.325496	0.0128768	0.0260651
CCDC127	0.403013	0.0128815	0.0260651
ECD	0.677531	0.012955	0.0261423
TOLLIP	0.435459	0.0129629	0.0261423
LARP4B	0.567557	0.0130464	0.0262667
METTL2A	0.471795	0.0131867	0.0265051
IFI35	0.294038	0.0133094	0.0267072
HERC6	0.651984	0.0133501	0.0267446
DYRK2	0.616686	0.0134134	0.0268268
ZCCHC6	0.613692	0.0134879	0.0269312
ZDHHC12	0.298688	0.0136774	0.0272644
GLB1	0.655451	0.0137163	0.0272971
PTRH1	0.551435	0.0138957	0.0275626
ATP5S	0.784955	0.0139182	0.0275626
SLC31A1	0.573431	0.0142964	0.0282652
ACAT1	0.588715	0.0143647	0.0283539
PIGK	0.514651	0.0144678	0.0285107
CKLF	0.282979	0.0145691	0.0286637
FBXO6	0.348911	0.0148644	0.0291971
IFT27	0.368123	0.0149273	0.0292731
NMRK1	0.532836	0.0150787	0.0295169
ATXN1	0.511111	0.0151005	0.0295169
SNRNP40	0.265669	0.0152486	0.0296669
APOE	0.427873	0.0152694	0.0296669
CREB3	0.331706	0.0152731	0.0296669
KPNA2	0.226767	0.0152755	0.0296669
AP3D1	0.418633	0.0154213	0.029902
NRBP1	0.304705	0.0154671	0.0299428
TMEM203	0.68074	0.0156771	0.0303008
TTC39B	0.510736	0.0157588	0.03041
ERBB2	0.386706	0.0158865	0.0306075
ASPH	0.36628	0.0160483	0.03087
CYR61	0.451981	0.0163542	0.0313884
EGLN1	0.696524	0.0163698	0.0313884
COPS7B	0.458693	0.016646	0.0318397
WDR70	0.31428	0.0167181	0.0319044
SUV39H2	0.549939	0.0167493	0.0319135
FAM84B	0.445653	0.0167766	0.0319151
C16orf72	0.493016	0.0168599	0.0320233
HSPA6	0.376601	0.0169363	0.0321178
SPR	0.564296	0.0170554	0.0322221
SDR16C5	0.469966	0.0170696	0.0322221
FBXO2	0.444845	0.0170899	0.0322221
CPD	0.351839	0.017098	0.0322221
C12orf29	0.448397	0.017365	0.0326743
NECAP1	0.512261	0.0174021	0.0326931
CKS1B	0.227041	0.0176343	0.0330779
OGFOD3	0.565984	0.0179262	0.0335735
RPL39L	0.270705	0.0180054	0.0336695
NAT9	0.53465	0.0183537	0.0342679
SRGAP1	0.58654	0.018752	0.0349574
PSMD5	0.667919	0.0189376	0.0352491
CEACAM6	0.768265	0.0191249	0.0355429
TMEM248	0.494993	0.0192792	0.0357336
GEMIN7	0.359204	0.0192867	0.0357336
MIDN	0.284545	0.0195217	0.0361137
TTC9C	0.477204	0.0196513	0.0362978
PIAS3	0.516791	0.0197877	0.036494
P2RX4	0.36647	0.0199536	0.0367439
BOLA1	0.336385	0.0200623	0.0368878
MESP1	0.377782	0.020195	0.0370753
CENPM	0.580887	0.0203268	0.0372607
KIAA0100	0.50789	0.0203757	0.0372937
SDC1	0.495711	0.020534	0.0375265
MRPS27	0.633947	0.0206414	0.0376659
DCUN1D1	0.381974	0.0207493	0.0378042
NMB	0.470575	0.0207798	0.0378042
RARRES1	0.265312	0.0209013	0.037968
RABEP1	0.717875	0.0209974	0.0380854
HMGB3	0.369997	0.021164	0.0383095
LARP6	0.590831	0.0211844	0.0383095
MT1F	0.326634	0.0216132	0.0390266
FIS1	0.254313	0.0216789	0.0390868
NUDT2	0.414325	0.0218418	0.0393217
SDCBP	0.203148	0.0218854	0.0393416
PHACTR2	0.611668	0.0223095	0.0400217
ZNF576	0.674768	0.02233	0.0400217
DNAJB14	0.52006	0.0226662	0.040564
TWF1	0.393054	0.023128	0.0412278
AP1G1	0.665067	0.0231289	0.0412278
MYL9	0.26798	0.0231394	0.0412278
SARNP	0.388332	0.0233295	0.0414995
SLC35B3	0.566701	0.0233606	0.0414995
PPM1A	0.428782	0.0235147	0.0417119
PCMTD1	0.351989	0.0235621	0.0417347
DVL1	0.414319	0.0238022	0.0420981
DPF2	0.455354	0.023851	0.0421228
MAP2K1	0.414469	0.0240325	0.0423814
APOBEC3C	0.667157	0.0241502	0.0425268
UBE2Z	0.282136	0.024228	0.0425505
PLS1	0.660628	0.0242656	0.0425505
MT2A	0.4202	0.0242693	0.0425505
ZFAND2A	0.318252	0.0244822	0.0428616
LRRC40	0.435925	0.0253807	0.0443704
LARP1B	0.569257	0.025711	0.0447853
PABPC4	0.488676	0.0257245	0.0447853
CBR4	0.600663	0.0258503	0.0449312
YIPF1	0.503742	0.0261829	0.0454438
DNAJB9	0.432434	0.0262516	0.0454977
TBC1D22A	0.543527	0.0264923	0.0458127
ZSCAN16-AS1	0.583613	0.0265092	0.0458127
ZNF544	0.509985	0.0266035	0.0458666
CTBP1	0.489506	0.0266264	0.0458666
TMED7	0.391015	0.0266542	0.0458666
SMC6	0.359055	0.0267061	0.0458904
RLF	0.558877	0.026846	0.0460654
GSN	0.228034	0.0268972	0.0460877
GALNT2	0.354813	0.0269947	0.0461051
RPRD2	0.417276	0.0270169	0.0461051
FOXA1	0.514284	0.0270219	0.0461051
MRPS17	0.446968	0.0270865	0.0461501
STOM	0.607721	0.0273929	0.0465565
PDE6D	0.468597	0.0274021	0.0465565
KIAA0319L	0.609986	0.0275985	0.0468244
U2AF1L4	0.603435	0.027654	0.0468527
DUSP11	0.27547	0.0279068	0.0472149
RAB35	0.542369	0.0281272	0.0475212
PRSS8	0.275652	0.0282841	0.0477195
UBE2W	0.286283	0.028756	0.048448
NUP153	0.545048	0.0290722	0.0488523
SUPT6H	0.429886	0.0290894	0.0488523
RNF34	0.382011	0.0291173	0.0488523
TMEM167B	0.539001	0.0301328	0.0504679
FBXO11	0.54073	0.0301638	0.0504679
MED15	0.433548	0.0304039	0.0507993
BORCS7	0.507217	0.03081	0.0514067
MYO1C	0.434471	0.0310329	0.0517073
CPM	0.565402	0.0314313	0.0522989
SPPL3	0.446953	0.0319654	0.0530434
ATF7	0.417274	0.0319665	0.0530434
ANKRD37	0.409709	0.032287	0.0534652
SOCS3	0.261576	0.0323093	0.0534652
RTP4	0.544948	0.0325592	0.0538051
FAM98C	0.38831	0.0326647	0.0539056
CENPF	0.359264	0.0327835	0.0540279
SMARCA2	0.50807	0.032948	0.0542251
TRIB3	0.520272	0.033189	0.0545473
TIMM8A	0.411391	0.0339356	0.0556986
CD82	0.55071	0.0340546	0.0558182
ZFPL1	0.260681	0.034481	0.0564404
LRP10	0.301706	0.034699	0.0567204
SOCS1	0.479724	0.0353588	0.0577209
QSOX1	0.19567	0.0354351	0.0577673
ATP2B1	0.544503	0.0359198	0.0583999
RCAN3	0.438184	0.0367526	0.0595935
CASP4	0.234788	0.0370713	0.0598733
HOXB7	0.355281	0.0370726	0.0598733
KIAA1143	0.289202	0.0370739	0.0598733
ICAM1	0.37775	0.0374335	0.0603049
TRIM47	0.292201	0.0374829	0.0603049
PSPC1	0.594806	0.0374909	0.0603049
YKT6	0.397258	0.0377035	0.0605663
GPCPD1	0.386574	0.0378607	0.060738
ARL2BP	0.365822	0.0379159	0.0607459
SYNC	0.437103	0.0383559	0.0613694
CNKSR3	0.603791	0.0384553	0.0614471
SLC34A2	0.616023	0.038559	0.0615314
RHOD	0.507508	0.0386274	0.0615592
INTS3	0.369626	0.0388813	0.0618161
LIMCH1	0.198943	0.0388909	0.0618161
STAU2	0.30989	0.0389667	0.0618552
TNFAIP2	0.247361	0.0392724	0.062254
DTX3L	0.401649	0.039321	0.062254
STXBP3	0.499852	0.0400732	0.0633169
GALNT1	0.40139	0.0400972	0.0633169
ACOX1	0.60075	0.0401736	0.0633547
REXO2	0.249593	0.0408491	0.0643359
RBBP5	0.388504	0.0411629	0.0647459
STRN3	0.497496	0.0414323	0.0650849
SPECC1	0.339708	0.0417412	0.065485
ANKRD28	0.466587	0.0425725	0.0667025
OTUD7B	0.38755	0.0430384	0.067345
PPP4R3A	0.365747	0.0432548	0.0675629
NSF	0.396592	0.0432895	0.0675629
TRIM11	0.393157	0.0437924	0.0682596
IER3	0.246167	0.0440136	0.0685159
LAMTOR3	0.426682	0.044886	0.0697841
DYNLT3	0.32702	0.0461073	0.0715908
ARRB2	0.492114	0.0463671	0.0719017
NKG7	0.507995	0.0471051	0.0729525
CHCHD6	0.505653	0.0471682	0.0729568
GLT8D1	0.404837	0.0475797	0.0734991
SAMD9	0.263362	0.0478284	0.0737889
TMEM159	0.360673	0.0479367	0.0738616
CANT1	0.34654	0.0483108	0.0743432
RPUSD3	0.411655	0.0483753	0.0743478
EPS8L1	0.525699	0.0487289	0.0747961
CNOT1	0.452841	0.0491082	0.0752827
TMC6	0.365334	0.0494529	0.0757149
NBL1	0.422574	0.0505299	0.077266
LINC00467	0.268975	0.0506536	0.0773572
TMEM256	0.190378	0.0509433	0.0777015
ACOT7	0.397285	0.0511095	0.0778566
TMEM128	0.530298	0.0512327	0.077946
RRS1	0.363927	0.0516212	0.0784383
PFN1	0.447495	0.0528142	0.0801501
DUSP1	0.178426	0.0532952	0.0806906
IQCG	0.533057	0.0533204	0.0806906
PDCD4	0.37797	0.0533707	0.0806906
ARMCX3	0.25846	0.0534678	0.0807364
ANKRD13A	0.557286	0.0539665	0.0813877
PYM1	0.189613	0.0540573	0.0814229
SKI	0.500534	0.0542775	0.0816528
ZBTB44	0.39984	0.0545093	0.0818996
CDV3	0.411747	0.0551601	0.0827744
IMPACT	0.378826	0.0552932	0.0828713
PHLDA1	0.220661	0.0559051	0.0836844
NFS1	0.302132	0.0560172	0.0837485
POLD3	0.587659	0.0562835	0.0840426
DGCR2	0.353659	0.056466	0.084211
TAF6	0.441616	0.0566829	0.0844303
MSN	0.231335	0.056948	0.0847207
WDR60	0.264857	0.0584477	0.0868043
DESI1	0.34811	0.0584923	0.0868043
BAIAP2L1	0.272339	0.0588443	0.0872195
TMTC3	0.564427	0.0597527	0.0884574
MXD1	0.396018	0.0603733	0.0892668
ZFYVE21	0.251643	0.0606247	0.0895289
MOCS2	0.292109	0.0610073	0.089984
RPL26L1	0.345509	0.0613658	0.0904022
YWHAH	0.155174	0.0616732	0.0907445
PTTG1	0.263339	0.0618132	0.0908398
PARD6B	0.439962	0.0621449	0.0912164
RALGAPB	0.55678	0.0627573	0.0920034
FBXL15	0.373843	0.0633746	0.0926834
TEX30	0.448525	0.0635489	0.092826
SNHG19	0.239178	0.0641308	0.0935628
IFIT3	0.255891	0.0645127	0.0940065
ARID1B	0.514168	0.0649896	0.0945873
KLF6	0.196783	0.065346	0.0949915
C5orf51	0.343045	0.0658343	0.0955864
CCDC58	0.253121	0.0671804	0.0974237
BORCS8	0.412074	0.0680441	0.0985579
PIGQ	0.515666	0.0681431	0.098583
CYFIP1	0.21591	0.0684694	0.0989367
EIF2B2	0.403234	0.0686995	0.0991505
FAM3A	0.348441	0.0690503	0.0995379
DNAJC11	0.395107	0.0696285	0.100252
IGHM	0.380818	0.0697518	0.10031
TSPAN15	0.344184	0.0700034	0.100552
TMCO3	0.331677	0.0702919	0.100846
STARD3NL	0.52247	0.0705089	0.101038
VRK1	0.457243	0.07079	0.10132
ERLIN2	0.429221	0.0711495	0.101714
STARD10	0.309338	0.0719835	0.102785
ZC3H12A	0.399041	0.0720687	0.102785
UGCG	0.25558	0.0728347	0.103755
RB1	0.498039	0.0729301	0.103769
GFER	0.256506	0.0740092	0.105056
ST14	0.226969	0.0741058	0.10507
JOSD2	0.246034	0.0743087	0.105234
HIPK3	0.433913	0.0744719	0.105342
NAPSA	0.608254	0.0749679	0.10592
C7orf49	0.519464	0.0757158	0.10675
CFD	0.35559	0.0757326	0.10675
ARL4A	0.27554	0.0763176	0.107449
BCL2L1	0.211985	0.0766805	0.107835
SRGN	0.209799	0.0774521	0.108793
MED13	0.297043	0.0786225	0.110119
MISP	0.305416	0.078667	0.110119
CHCHD7	0.339869	0.0786695	0.110119
PDLIM4	0.334841	0.0789149	0.110328
CREBZF	0.337737	0.0790018	0.110328
RAB31	0.259667	0.0797022	0.111178
HYOU1	0.353492	0.0807483	0.112491
C8orf76	0.422766	0.0808293	0.112491
TM9SF4	0.314871	0.0810801	0.11271
ORC2	0.37507	0.0812426	0.112806
S100A7	0.196521	0.0815658	0.113124
CBLC	0.290271	0.081844	0.11338
EAPP	0.153394	0.0822871	0.113833
SGK1	0.275235	0.082359	0.113833
SETD9	0.34608	0.0833452	0.11495
MUC1	0.159407	0.0833581	0.11495
UBR4	0.303992	0.0835997	0.115028
RIPK2	0.353406	0.0836049	0.115028
C5orf38	0.436976	0.0857859	0.117895
C5orf56	0.503963	0.0859746	0.11802
TMEM181	0.489422	0.0869365	0.119205
GCHFR	0.197477	0.087348	0.119633
LYAR	0.282693	0.0876069	0.119785
FN1	0.231873	0.0877826	0.119785
ERO1A	0.105414	0.0878394	0.119785
RCE1	0.336049	0.0878556	0.119785
DCPS	0.247296	0.088344	0.120315
HMOX1	0.351541	0.0898634	0.122247
ARL16	0.174833	0.0902998	0.122702
TP53I3	0.256125	0.0909576	0.123457
IFI27L1	0.379535	0.0911581	0.12359
PHKG2	0.334725	0.0913004	0.123645
TMEM141	0.134243	0.0925581	0.125094
ICMT	0.341123	0.0925779	0.125094
NMU	0.357171	0.0935618	0.126282
CHP1	0.176506	0.0937213	0.126356
EBAG9	0.271063	0.094124	0.126758
RAB8A	0.212658	0.094974	0.12776
PSEN1	0.378093	0.095173	0.127829
FAM91A1	0.354855	0.0952365	0.127829
NRP1	0.367436	0.0960421	0.128767
MARK2	0.403691	0.0961527	0.128772
TXNIP	0.120336	0.0964003	0.128961
PHF1	0.327301	0.096944	0.129545
MT-ND3	0.297915	0.0970876	0.129593
CRKL	0.285003	0.0978762	0.130502
NELFA	0.372604	0.0981629	0.13074
CKAP2	0.19578	0.0990895	0.131735
CTSL	0.188485	0.0991283	0.131735
RABL6	0.422667	0.100628	0.133581
MTHFD2L	0.269053	0.101085	0.13404
SERTAD3	0.208964	0.101382	0.134287
RAB27A	0.399048	0.101823	0.134723
SLC7A6OS	0.501806	0.104113	0.137602
VAMP5	0.315037	0.104492	0.137888
MAPKAP1	0.289568	0.104557	0.137888
CLEC2B	0.50607	0.106006	0.13951
RGS19	0.304568	0.106018	0.13951
TFF3	0.457697	0.107228	0.140858
TM2D2	0.289253	0.107276	0.140858
CBX6	0.483673	0.107441	0.140922
SFTA3	0.461145	0.107967	0.141458
NPC2	0.20531	0.110453	0.144558
CCDC90B	0.21467	0.111261	0.145459
CDK2	0.287809	0.11171	0.145887
GZMB	0.304428	0.112282	0.146475
MYCBP	0.211276	0.112951	0.14719
SEPT11	0.218096	0.113565	0.14783
ARFGAP3	0.232121	0.113894	0.148099
TRAF2	0.443339	0.114802	0.149119
SPSB2	0.221852	0.116558	0.151237
IER5	0.273456	0.1175	0.152296
AASDHPPT	0.265532	0.118205	0.152992
RAI14	0.175234	0.118366	0.152992
DDX60	0.420819	0.118417	0.152992
HSD3B7	0.33972	0.118599	0.153064
WDFY1	0.30113	0.118726	0.153065
CCNB2	0.343225	0.119859	0.15436
WSB1	0.167967	0.120119	0.15453
AKT1	0.311402	0.121314	0.155889
CD3D	0.375452	0.121433	0.155889
GNPNAT1	0.339876	0.121728	0.156101
SAMD9L	0.433324	0.122427	0.156831
HERC4	0.243441	0.122617	0.156909
CCNK	0.353859	0.12285	0.157041
AURKA	0.301203	0.123169	0.157281
TGIF1	0.0842884	0.12535	0.159898
SHOC2	0.227905	0.125745	0.160233
ITGB4	0.177779	0.126814	0.161254
EMP3	0.293565	0.128251	0.162909
SPINK5	0.312719	0.128528	0.163091
XPO5	0.305282	0.130802	0.165801
USP6NL	0.351144	0.132176	0.167368
ITGA3	0.140418	0.133701	0.169121
SLC9A3R1	0.343384	0.134829	0.17037
UBE3B	0.352689	0.135896	0.171538
MFAP1	0.244479	0.136635	0.172291
ERN1	0.308535	0.137878	0.17357
BTBD1	0.386019	0.137936	0.17357
MIF4GD	0.220379	0.138486	0.173953
HNMT	0.187601	0.138529	0.173953
KLF5	0.310736	0.140812	0.176453
CASP2	0.368483	0.141236	0.176801
THAP1	0.332272	0.142227	0.177857
SLC16A3	0.151296	0.143115	0.178783
TMEM63B	0.294323	0.143529	0.179115
RDH10	0.223427	0.143872	0.179358
FAM111A	0.183102	0.144408	0.17984
ANKRD40	0.349437	0.147883	0.183978
CTDSPL2	0.371524	0.148491	0.184545
SUPT3H	0.311492	0.149323	0.185284
FOSL2	0.179316	0.149393	0.185284
DVL3	0.306022	0.150089	0.185956
AZI2	0.232738	0.150246	0.18596
MBIP	0.209487	0.150564	0.186163
CENPN	0.29788	0.152311	0.188042
DCK	0.314276	0.152395	0.188042
MRPS6	0.109832	0.153156	0.188673
WDR45	0.144254	0.153218	0.188673
KIF20B	0.361532	0.155756	0.191428
OVOL2	0.343638	0.155773	0.191428
H2AFX	0.163211	0.156798	0.192491
CD52	0.124241	0.157515	0.193176
S100A4	0.147952	0.158312	0.193907
FDX1	0.140377	0.158433	0.193907
ADM	0.29213	0.158635	0.193958
EHBP1	0.361812	0.161392	0.19713
TIMP3	0.405337	0.161815	0.197285
PIK3IP1	0.441581	0.161846	0.197285
MAEA	0.139659	0.163467	0.199061
AQP3	0.337619	0.16531	0.201018
CCDC82	0.31891	0.165407	0.201018
KCNS3	0.296315	0.167835	0.203764
CARD16	0.35345	0.168015	0.203777
MFSD14B	0.26553	0.171623	0.207944
ESYT2	0.180607	0.172863	0.209237
CDS2	0.261917	0.173621	0.209944
CCL5	0.242777	0.175382	0.211666
USB1	0.203267	0.175395	0.211666
PURB	0.407514	0.176595	0.212901
PMAIP1	0.144641	0.178411	0.214876
EPPK1	0.386378	0.183595	0.220899
WFDC2	0.396313	0.185135	0.222531
CCDC77	0.26528	0.186841	0.224357
TOP2A	0.102459	0.18703	0.224362
AGR3	0.320065	0.191377	0.229349
PLS3	0.355995	0.196311	0.235029
STK17B	0.187619	0.204644	0.244762
DUSP22	0.192729	0.208321	0.248913
GSKIP	0.255098	0.211331	0.252261
CSNK1E	0.116027	0.212344	0.253219
CDK1	0.0510195	0.214266	0.254872
JUND	0.117197	0.214336	0.254872
APLP2	0.166475	0.214363	0.254872
RALB	0.194944	0.217067	0.257581
SCO2	0.13553	0.223811	0.265322
WEE1	0.186739	0.225094	0.266582
CALML5	0.200679	0.227053	0.268639
MKLN1	0.239785	0.227457	0.268853
KCNK1	0.221785	0.231764	0.273676
CAV2	0.206649	0.232372	0.274127
SSFA2	0.248005	0.23848	0.281058
CKAP5	0.316958	0.239345	0.281802
SPTAN1	0.149418	0.243692	0.286641
C1QA	0.224361	0.244913	0.287797
ADAM9	0.135757	0.245765	0.288517
TGFBI	0.122052	0.247385	0.290138
PTN	0.14039	0.248369	0.291008
PDZK1IP1	0.127992	0.249594	0.29216
HCST	0.236989	0.25257	0.295357
IFITM1	0.118044	0.254622	0.297469
GNLY	0.0717513	0.259936	0.302942
MTFR1	0.126642	0.260059	0.302942
SETD7	0.224229	0.261713	0.304576
NEK7	0.203806	0.262376	0.305053
RASSF1	0.181963	0.262637	0.305062
PGAP2	0.295464	0.263183	0.305403
EMP1	0.252083	0.263767	0.305788
BPGM	0.185619	0.264988	0.306716
TK1	0.201949	0.265076	0.306716
SFTPB	0.326831	0.266884	0.308513
MAD2L1	0.0524785	0.268178	0.309713
RREB1	0.26386	0.272888	0.314851
IFITM2	0.13087	0.274867	0.316831
PELI1	0.126665	0.279236	0.321462
PEX26	0.209625	0.279559	0.321462
CCNB1	0.14087	0.279682	0.321462
RGS1	0.227219	0.280817	0.322459
KNSTRN	0.167311	0.28122	0.322615
OPN3	0.271866	0.282001	0.322994
TMEM120A	0.21033	0.282085	0.322994
ITGB6	0.133505	0.290393	0.331878
KIAA1551	0.186721	0.292304	0.333746
ZFP36	0.070068	0.294847	0.336331
NDRG1	0.0248981	0.299529	0.341028
CAB39	0.202923	0.301963	0.343476
TINAGL1	-0.0495708	0.30296	0.344285
SPOPL	0.12192	0.304582	0.345804
MLPH	0.126344	0.306651	0.347826
TMEM127	0.186418	0.307893	0.348906
ACP5	0.0948225	0.309636	0.350554
COTL1	0.223922	0.311519	0.352355
ID3	0.0234637	0.313318	0.354058
TRIM37	0.151909	0.314907	0.355521
CHIC2	0.209796	0.315503	0.355862
MUCL1	0.16057	0.320208	0.360831
C12orf75	0.00943098	0.324293	0.365094
CLSPN	0.140583	0.328361	0.36933
EXOC1	0.113559	0.329645	0.370377
C11orf1	0.0551237	0.329906	0.370377
ALOX5AP	0.0972098	0.330614	0.370627
ICAM3	0.143903	0.330889	0.370627
ADGRE5	0.126243	0.331049	0.370627
RAB9A	0.193973	0.335975	0.375795
FBXW5	0.0645064	0.339806	0.379728
CAPN8	0.124453	0.340462	0.380109
PRC1	0.100191	0.348883	0.389151
IGFBP4	0.120012	0.355045	0.395659
TNFAIP8	0.188032	0.357884	0.398456
S100A2	0.0316022	0.36165	0.402277
MKNK2	0.0562966	0.371151	0.412087
ATL3	0.0405461	0.373093	0.413863
SDCCAG8	0.0170345	0.377941	0.418471
PHC2	0.127334	0.378776	0.419012
CCDC57	0.0668897	0.379328	0.419239
JCHAIN	0.137049	0.38015	0.419763
HCFC1R1	-0.0339665	0.383152	0.422692
CLIC3	0.0692453	0.384018	0.423261
PTPRS	0.205412	0.388255	0.427541
SLC2A1	0.0145493	0.390646	0.429781
CEBPB	-0.0104855	0.400834	0.440589
ZBTB7A	0.0783649	0.401913	0.441373
GPRC5A	0.156889	0.406078	0.445543
RCN3	0.224156	0.423672	0.464424
SFN	0.0503274	0.426918	0.467559
RAPH1	0.0197805	0.42735	0.467608
SLMAP	0.177337	0.431039	0.471079
LAPTM5	0.186976	0.431303	0.471079
STEAP1	0.18043	0.433633	0.473197
PLAC8	0.126404	0.435602	0.474916
MAP1B	0.0486722	0.438703	0.477435
GLS	0.114825	0.44103	0.479105
FAM114A1	-0.012026	0.44359	0.481452
MB	-0.0236318	0.447732	0.485512
APOC1	0.0423486	0.458559	0.496807
CENPU	0.0339903	0.460742	0.498517
FAM129B	-0.0396544	0.460963	0.498517
GJA1	0.0352557	0.468548	0.505815
PXN	0.115067	0.469022	0.505874
TPX2	-0.0100766	0.469558	0.506001
WFDC3	0.0514385	0.470534	0.506149
LYZ	0.198162	0.479977	0.515848
ZFP36L2	-0.00409773	0.48297	0.518602
TP53TG1	0.0212144	0.486737	0.52172
RFC3	0.029018	0.491181	0.526016
CXCL13	0.0266165	0.492584	0.527052
IFIT1	0.149216	0.494882	0.529042
NUSAP1	-0.0923201	0.495867	0.529626
SAA1	0.0856556	0.50412	0.537966
FCER1G	-0.00627634	0.506419	0.539941
ETS2	-0.0134868	0.517803	0.550872
TBC1D10A	0.0896411	0.518038	0.550872
MAP7D1	0.0702305	0.527547	0.56049
PLAU	0.0175705	0.52827	0.560765
RAD51AP1	-0.00721515	0.536011	0.568482
RRAS	0.0326843	0.53998	0.572189
AGR2	0.214138	0.542071	0.573902
TYROBP	-0.0549509	0.546197	0.577764
SLC5A3	-0.13452	0.549223	0.580456
CCL18	0.146383	0.55032	0.581107
CXCL10	-0.01913	0.553161	0.583597
DUSP6	0.138322	0.560522	0.59059
PEA15	0.0357434	0.560767	0.59059
SMCO4	0.102839	0.565022	0.594221
RHOB	0.0273815	0.565199	0.594221
CDC20	-0.00654644	0.569885	0.598627
GDF15	0.0699199	0.572328	0.600671
MGLL	-0.0104657	0.585733	0.613674
MPZL2	-0.054068	0.587477	0.614967
SIPA1	-0.0732793	0.592117	0.619288
FBXO32	-0.0328039	0.597108	0.623967
TGFBR2	0.0768991	0.603071	0.629111
RHOF	-0.10718	0.604747	0.630314
CD7	-0.0870067	0.616204	0.641149
CRTAP	0.00917592	0.631913	0.656929
MIR4435-2HG	-0.100217	0.634038	0.658571
CRABP2	-0.0951659	0.641972	0.666239
BCL3	-0.0161296	0.666665	0.689495
ELK3	-0.0251876	0.669865	0.691621
TUBB6	0.00789267	0.671871	0.6931
SNHG25	-0.139818	0.67406	0.694765
SRD5A3	-0.0535257	0.678297	0.698536
BIRC5	-0.0205422	0.689126	0.709084
RNASE1	-0.000396408	0.695582	0.715118
S100A8	-0.0960832	0.711812	0.731181
VEGFA	-0.0793254	0.715645	0.734406
SPTSSA	0.03203	0.716167	0.734406
PTGS2	0.00539634	0.72014	0.737853
DCBLD2	-0.108552	0.722003	0.739136
SH3GL1	-0.0697704	0.750019	0.765869
TIMP2	-0.119487	0.79338	0.808779
PLEC	-0.243075	0.805031	0.818422
PRR34-AS1	-0.138904	0.80555	0.818422
PIM1	-0.116324	0.834832	0.84746
QKI	-0.0241343	0.837402	0.849355
C6orf226	-0.203547	0.898242	0.908014
TIMP1	-0.0978523	0.904663	0.913739
IVL	-0.149482	0.907835	0.916178
EPAS1	-0.175164	0.92425	0.931965
LCN2	-0.132392	0.926574	0.933194
TM4SF1	-0.047839	0.927014	0.933194
LAMC2	-0.228598	0.946108	0.95083
C1QB	-0.157581	0.968738	0.972764
CD68	-0.0959896	0.987467	0.987467
PVR	-0.137098	0.985283	0.9861
KRT17	-0.213771	0.977003	0.978624
SEMA3B	-0.146487	0.971883	0.974303
UPP1	-0.174849	0.971082	0.974303
IRS1	-0.145673	0.930901	0.936327
TFPI	-0.043016	0.897885	0.908014
PHACTR3	-0.256049	0.86793	0.878843
ITGA2	-0.260658	0.859689	0.871228
RPS4Y1	-0.114535	0.798155	0.812275
BIRC3	-0.273064	0.794234	0.808966
EDN1	-0.262552	0.785153	0.801069
PHLDA2	-0.069567	0.742908	0.759249
PRSS23	-0.224141	0.729836	0.746521
F3	-0.40624	0.668031	0.690318
TGFA	-0.259789	0.66532	0.688695
TACSTD2	-0.11397	0.6614	0.685224
NUF2	-0.293705	0.652265	0.67634
SPRR2D	-0.252138	0.615559	0.64103
CDA	-0.356016	0.601722	0.628246
AREG	-0.196799	0.585463	0.613674
IGHG4	-0.339321	0.513862	0.547394
RPL41	-0.0146006	0.485106	0.520434
CST6	-0.493214	0.469979	0.506002
LGALS1	-0.177704	0.462381	0.499603
SPP1	-0.507896	0.440676	0.479105
ABCA7	-0.235832	0.436374	0.475329
ID1	-0.364039	0.374509	0.415052
FAM83A	-0.360908	0.370497	0.411739
SPINK1	-0.165469	0.299122	0.340886
SFTA2	-0.201147	0.282979	0.323711
CSTB	0.106145	0.256912	0.299854
CCND1	-0.267789	0.215774	0.256298
TREM1	-0.737561	0.14058	0.176345
PAEP	-0.420616	0.126499	0.161023
ERRFI1	-0.393864	0.0736379	0.104652
CRIP1	-0.453236	0.0628354	0.0920063
SNCG	-0.687474	0.0365249	0.0593039
ANGPTL4	-0.613937	0.0356902	0.0581048
UBE2C	-0.382085	0.0257293	0.0447853
S100P	-0.595947	0.0166579	0.0318397
TNNC2	-0.58168	0.0137822	0.0273831
S100A16	-0.503211	0.00607814	0.0146555
C15orf48	-0.518595	0.00604802	0.0146263
RPS28	-0.00392454	0.0026551	0.00771
IGFBP3	-1.21748	0.00158354	0.00519815
KRT7	-0.116218	0.000730114	0.00290124
CCL20	-0.883359	0.000687044	0.00281808
C19orf33	-0.848054	0.000433797	0.00197746
HOPX	-0.723763	0.000209336	0.00113398
GPX4	-0.260749	5.26654e-05	0.000397624
