# Supplementary material for: SIDISH Identifies High-Risk Disease-Associated Cells and Biomarkers by Integrating Single-Cell Depth and Bulk Breadth
Source: Research Square preprint supplement (doi:10.21203/rs.3.rs-5921999/v1), 2025-03-10
Supplement: Supplementary file 3 [file 31743647e3f0b21408d035bd.xlsx]

## Sheet: Description
Description:
1. Scissor Cell Labels: Full list of BRCA cells and their associated labels predicted by Scissor for benchmarking purposes. Scissor+ cells were classified as High-Risk cells, while the remaining cells, including Scissor- cells, were labeled as Background cells.
2. DEGAS Cell labels: Full list of BRCA cells and their associated labels predicted byDEGAS for benchmarking purposes. Predicted score > 0.5 were classified as High-Risk cells, while the remaining cells were labeled as Background cells.
3. scAB Cell labels: Full list of BRCA cells and their associated labels predicted by scAB for benchmarking purposes. "scAB+" cells were classified as High-Risk cells, while the cells labelled as "Other cells" were labeled as Background cells.
4. Scissor Differential Genes: All the differentially expressed genes between High-Risk cells and Background cells (Scissor derived) with an adjusted P value < 0.05. The log Fold change was calculated using a two-tailed Wilcoxon rank sum test
5. Scissor Differential Genes: All the differentially expressed genes between High-Risk cells and Background cells (DEGAS derived) with an adjusted P value < 0.05. The log Fold change was calculated using a two-tailed Wilcoxon rank sum test
6. Scissor Differential Genes: All the differentially expressed genes between High-Risk cells and Background cells (scAB derived) with an adjusted P value < 0.05. The log Fold change was calculated using a two-tailed Wilcoxon rank sum test

## Sheet: 1. Scissor Cell Labels 
Cell	Label
CID44041_AAAGTAGTCCTAGGGC	Background
CID44041_AACACGTCAACACCTA	High-Risk
CID44041_AACTTTCTCCTACAGA	Background
CID44041_AAGGCAGTCATTGCGA	Background
CID44041_AAGGTTCGTTGTCGCG	Background
CID44041_AATCGGTAGAGCTGGT	Background
CID44041_ACCAGTACATGCTGGC	High-Risk
CID44041_ACCTTTAAGACGCAAC	Background
CID44041_ACGGAGATCGATGAGG	High-Risk
CID44041_ACTGCTCAGCTGTCTA	Background
CID44041_ACTTGTTCATGGTAGG	Background
CID44041_AGGTCATTCACCCTCA	Background
CID44041_AGTCTTTTCACTATTC	Background
CID44041_AGTGTCACAAGCTGGA	Background
CID44041_ATAAGAGGTAGCCTCG	Background
CID44041_CAAGAAATCCCGGATG	Background
CID44041_CACATAGCATTTGCTT	Background
CID44041_CACTCCAAGTTGAGAT	Background
CID44041_CAGCATATCCGGCACA	Background
CID44041_CAGCGACCATGGTCTA	High-Risk
CID44041_CAGGTGCCATACTCTT	High-Risk
CID44041_CATATGGTCAGGCCCA	High-Risk
CID44041_CATCGGGAGTGGTCCC	Background
CID44041_CCACTACTCCAGATCA	Background
CID44041_CCAGCGAAGTGCGATG	Background
CID44041_CCGGGATCAGATGGCA	Background
CID44041_CCTTACGGTAATCACC	Background
CID44041_CGACCTTGTTCCACAA	Background
CID44041_CGACTTCTCGCTTAGA	Background
CID44041_CGCGTTTGTGCTGTAT	Background
CID44041_CGCTGGAGTCGAGATG	Background
CID44041_CGGGTCATCTTGCCGT	Background
CID44041_CGTCACTTCACCATAG	Background
CID44041_CGTCAGGTCGGTCCGA	Background
CID44041_CGTGAGCTCCTAGTGA	Background
CID44041_CGTGTAAGTCACTTCC	Background
CID44041_CGTTCTGGTCAGAAGC	High-Risk
CID44041_CTACACCAGTACTTGC	Background
CID44041_CTACCCAGTCTCACCT	High-Risk
CID44041_CTAGTGATCACCCGAG	Background
CID44041_GAAACTCAGGAATTAC	Background
CID44041_GAATAAGCAATGGTCT	Background
CID44041_GACCAATAGCCACTAT	Background
CID44041_GATCGATCATGTAGTC	Background
CID44041_GCAAACTTCGGAGCAA	Background
CID44041_GCATGATAGAACAATC	Background
CID44041_GGCCGATCACTCGACG	Background
CID44041_GTAACTGGTAAACCTC	Background
CID44041_GTACGTACAATGTTGC	Background
CID44041_GTCAAGTAGGGTGTTG	Background
CID44041_GTGTTAGAGGAATGGA	High-Risk
CID44041_TAAGAGATCTGTCAAG	High-Risk
CID44041_TACGGGCAGCGAAGGG	Background
CID44041_TAGACCAGTCGAACAG	Background
CID44041_TATGCCCGTCGACTGC	High-Risk
CID44041_TCAGGATGTCTCCATC	High-Risk
CID44041_TCATTTGTCACCTCGT	Background
CID44041_TCGTAGAAGAACTCGG	Background
CID44041_TCGTAGACAGACACTT	Background
CID44041_TCTATTGCACCTGGTG	High-Risk
CID44041_TCTCATAGTCACAAGG	Background
CID44041_TGATTTCTCACCATAG	Background
CID44041_TGCCAAAGTTGTTTGG	Background
CID44041_TGGCTGGTCATCATTC	Background
CID44041_TGGGAAGAGCCCAATT	Background
CID44041_TGGGCGTGTTATGTGC	Background
CID44041_TGTCCCAAGTATCTCG	Background
CID44041_TTAGGCATCGGAAATA	Background
CID44041_TTTACTGCATGACGGA	Background
CID44041_TCGGTAAAGATGGGTC	Background
CID44041_CGGTTAATCTAAGCCA	Background
CID44041_CATCGAACATATACCG	Background
CID44041_CCTCAGTGTCCAGTGC	Background
CID44041_GCTGCGAAGAGTACCG	Background
CID44041_GGATTACAGAGGTTGC	Background
CID44041_ACGGAGACATCTCGCT	Background
CID44041_ATCCGAAGTGCAGACA	Background
CID44041_CATGGCGGTTCTGTTT	Background
CID44041_CTAATGGTCTACCTGC	Background
CID44041_TCCCGATTCAAACAAG	Background
CID44041_GGCTCGAGTTGCCTCT	Background
CID44041_AGTCTTTAGCAAATCA	Background
CID44041_TCATTTGTCCTGTAGA	Background
CID44041_TTGCGTCTCAGCACAT	Background
CID44041_GCATGATCAGTGACAG	Background
CID44041_CAGCTGGAGACAGAGA	Background
CID44041_CGACTTCGTTCTCATT	Background
CID44041_TTCTACAAGCTATGCT	Background
CID44041_AAAGCAAAGTAGGCCA	Background
CID44041_AAGGCAGAGACTTTCG	Background
CID44041_AATCGGTGTTCTGGTA	Background
CID44041_ATCCACCAGTGAAGTT	High-Risk
CID44041_CAACCAAAGTTAAGTG	Background
CID44041_CAGCGACGTTGCCTCT	Background
CID44041_CAGGTGCAGTTGAGTA	Background
CID44041_CCTAAAGCAATAACGA	Background
CID44041_CGTCCATAGCTAGCCC	Background
CID44041_CTAACTTGTGCAACTT	Background
CID44041_CTTACCGGTGTGTGCC	High-Risk
CID44041_GAACATCTCAACGAAA	Background
CID44041_GACGGCTTCGGTGTTA	Background
CID44041_GACTAACTCCACTGGG	Background
CID44041_GAGCAGAGTAGCGATG	High-Risk
CID44041_GATGAAAAGTCAATAG	Background
CID44041_GCAGCCATCTTGAGGT	Background
CID44041_GTAACGTGTGAGGGAG	Background
CID44041_GTCTCGTGTACAAGTA	Background
CID44041_TAAGAGAAGCCGATTT	Background
CID44041_TATCAGGAGCATCATC	High-Risk
CID44041_TTTACTGTCAGGATCT	Background
CID44041_AATCGGTGTGTTTGTG	Background
CID44041_ACGCCAGAGGTGTGGT	Background
CID44041_CACAGGCGTGAAAGAG	Background
CID44041_CCCAATCTCACCAGGC	High-Risk
CID44041_CCCTCCTGTCGGCATC	Background
CID44041_CCTATTAAGAGGTAGA	Background
CID44041_CGTAGCGCAACACGCC	High-Risk
CID44041_CTGATAGAGTGTACGG	Background
CID44041_GTATTCTTCACGCATA	Background
CID44041_TATGCCCGTACTCGCG	Background
CID44041_TTGAACGCACCGATAT	Background
CID44041_ATCTACTGTTCCAACA	Background
CID44041_AACACGTAGTTGAGTA	Background
CID44041_AGGCCACCATATGCTG	High-Risk
CID44041_ATCTGCCGTGCGGTAA	Background
CID44041_GCACTCTTCTCGCTTG	Background
CID44041_AACCGCGCACATCCAA	High-Risk
CID44041_ACTGTCCTCTGTGCAA	Background
CID44041_CAACTAGAGGTGCACA	High-Risk
CID44041_CACATAGAGTACGACG	High-Risk
CID44041_CACCTTGGTCTAAAGA	Background
CID44041_CCTTCGATCACCAGGC	Background
CID44041_CGTCAGGTCCACGACG	Background
CID44041_CTCTAATAGCTAACTC	Background
CID44041_CTGAAGTCAGGACCCT	Background
CID44041_GGAGCAAGTACACCGC	Background
CID44041_GTCGGGTTCCGCGGTA	Background
CID44041_GTTCTCGAGTGACTCT	High-Risk
CID44041_TGCCCTATCTTACCTA	Background
CID44041_TGTATTCGTCAACTGT	Background
CID44041_TGTCCCAAGTTTGCGT	High-Risk
CID44041_TTTATGCAGACGCACA	High-Risk
CID44041_AAAGTAGTCTGATTCT	Background
CID44041_ACATCAGAGAGCCTAG	Background
CID44041_ACCCACTGTCTTCTCG	High-Risk
CID44041_ACGCAGCCACGGATAG	Background
CID44041_ACTGATGGTCGGCACT	Background
CID44041_ACTTGTTTCAACACCA	High-Risk
CID44041_AGAATAGAGCGCTCCA	Background
CID44041_AGACGTTAGTTCCACA	Background
CID44041_AGACGTTGTCCGTGAC	Background
CID44041_AGATTGCGTCTGCAAT	Background
CID44041_AGCCTAAGTAAACACA	Background
CID44041_AGGTCATAGCCATCGC	High-Risk
CID44041_AGTGAGGCAGAGTGTG	High-Risk
CID44041_ATCTACTCACAGGTTT	High-Risk
CID44041_ATGCGATGTTCCGTCT	High-Risk
CID44041_ATGTGTGAGAATGTGT	High-Risk
CID44041_ATTGGACTCCGCGCAA	Background
CID44041_CAACCTCTCAGGCAAG	High-Risk
CID44041_CACACTCAGGTGGGTT	Background
CID44041_CACATAGTCTGTTGAG	Background
CID44041_CACATTTCATCACGTA	High-Risk
CID44041_CAGATCAAGCCAGAAC	Background
CID44041_CAGATCAGTAAGGATT	Background
CID44041_CATCAGAAGGATATAC	Background
CID44041_CATGGCGTCGAATGGG	Background
CID44041_CCGTGGAGTTTGGGCC	Background
CID44041_CCTATTACAAGGACTG	High-Risk
CID44041_CCTTCCCAGTCTCGGC	High-Risk
CID44041_CGATGGCCATGCTGGC	High-Risk
CID44041_CGCTGGATCATGCAAC	Background
CID44041_CGTCTACCAGCAGTTT	Background
CID44041_CTCACACCAAAGGCGT	Background
CID44041_CTCGGGAAGATAGTCA	High-Risk
CID44041_CTTCTCTCATATGAGA	Background
CID44041_GAACCTAAGGTAAACT	Background
CID44041_GACACGCGTCTCCACT	High-Risk
CID44041_GACCTGGAGACAGGCT	Background
CID44041_GACGTTACACTGCCAG	High-Risk
CID44041_GAGTCCGTCCCAGGTG	Background
CID44041_GCATGATTCTACGAGT	High-Risk
CID44041_GGAAAGCAGATAGGAG	Background
CID44041_GGCGACTCATGTCTCC	High-Risk
CID44041_GTAACGTTCGGAGGTA	Background
CID44041_GTACTCCTCCCGGATG	High-Risk
CID44041_GTACTTTAGCTCAACT	Background
CID44041_GTCATTTCACACCGAC	High-Risk
CID44041_GTCATTTGTCTGGTCG	Background
CID44041_GTGCTTCTCTTGCCGT	High-Risk
CID44041_TACAGTGGTTCAACCA	High-Risk
CID44041_TAGAGCTGTTACTGAC	Background
CID44041_TAGAGCTTCAAGGTAA	High-Risk
CID44041_TAGCCGGTCGTTTGCC	Background
CID44041_TATGCCCGTCTAGAGG	Background
CID44041_TCACGAATCTTATCTG	High-Risk
CID44041_TCAGCAAAGTTCGCGC	Background
CID44041_TCGCGAGAGTGAATTG	High-Risk
CID44041_TCGCGTTGTCCAGTAT	Background
CID44041_TCTGAGAAGAAAGTGG	Background
CID44041_TCTTCGGAGCGTGAGT	Background
CID44041_TGGTTAGGTCAAAGAT	Background
CID44041_TTAGGACTCATTCACT	Background
CID44041_TTGCCGTAGTTAAGTG	Background
CID44041_TTTCCTCGTCAGAATA	High-Risk
CID44041_AACCATGCATGTAAGA	Background
CID44041_AACGTTGTCCCTTGCA	Background
CID44041_ACGCAGCCATATGGTC	Background
CID44041_ACTTGTTTCTTCATGT	Background
CID44041_CAACTAGAGTACACCT	Background
CID44041_CACATAGTCTAGCACA	Background
CID44041_CAGCCGAAGATCCGAG	Background
CID44041_CAGTCCTCACGCGAAA	Background
CID44041_CCCTCCTAGCGAAGGG	High-Risk
CID44041_CGGCTAGTCAACCATG	Background
CID44041_CGTGTCTGTAGGAGTC	Background
CID44041_CTAATGGTCCTCATTA	Background
CID44041_CTCGAAATCCTATGTT	Background
CID44041_GACCTGGGTGGCAAAC	Background
CID44041_GCATGATGTACGACCC	Background
CID44041_TACTTACCACCTGGTG	Background
CID44041_TACTTACTCCAAAGTC	Background
CID44041_TGGTTCCGTAGCGCAA	Background
CID44041_TTAGGCACATGATCCA	High-Risk
CID44041_TTGGCAAGTGGCAAAC	Background
CID44041_AGCCTAAGTTCTGTTT	Background
CID44041_AGCGTATAGGAGTACC	Background
CID44041_CACATAGAGCTTCGCG	Background
CID44041_CCTCTGACACGGCTAC	Background
CID44041_CGATGTATCCTTAATC	Background
CID44041_CGCCAAGTCAAAGACA	Background
CID44041_CGTGAGCCAATCACAC	High-Risk
CID44041_GCTCCTAGTTTGGCGC	Background
CID44041_TCACAAGAGTCATCCA	High-Risk
CID44041_TGATTTCAGTCATCCA	High-Risk
CID44041_TGGTTAGCAATGCCAT	Background
CID44041_AAGTCTGCACGGACAA	Background
CID44041_ACTTGTTCAGCGTCCA	Background
CID44041_AGCCTAAAGATACACA	Background
CID44041_ATTCTACGTAATCGTC	Background
CID44041_ATTGGTGCATGGTCAT	Background
CID44041_CAACTAGGTCACACGC	High-Risk
CID44041_CAGAGAGTCGATCCCT	Background
CID44041_CTCGGGATCTTCAACT	Background
CID44041_GGGACCTCACCAACCG	High-Risk
CID44041_GTACGTAAGTAATCCC	Background
CID44041_GTACTCCAGTCTCCTC	Background
CID44041_GTATTCTAGTGAATTG	Background
CID44041_TCCCGATTCCATGCTC	Background
CID44041_TGGCTGGCACGCATCG	Background
CID44041_TGGCTGGCAGACACTT	Background
CID44041_TTCTCAATCGCCCTTA	Background
CID44041_GGTATTGAGATGCCTT	Background
CID44041_TGACAACAGCGAGAAA	High-Risk
CID44041_CTCGAAAAGCTTATCG	Background
CID44041_GTAACTGAGTGTACCT	Background
CID44041_TTGCCGTTCAGCAACT	Background
CID44041_CATTATCAGCTGCGAA	High-Risk
CID44041_TACACGACAGAGTGTG	Background
CID44041_AACTCCCAGTACCGGA	High-Risk
CID44041_AACTTTCGTGGCCCTA	Background
CID44041_AAGACCTGTCAATGTC	Background
CID44041_ACAGCTATCGTACCGG	Background
CID44041_ACGAGGAAGAGTAAGG	Background
CID44041_AGAATAGTCCGCTGTT	Background
CID44041_ATCCGAAGTGTGAATA	Background
CID44041_CACACAAAGCCACGCT	Background
CID44041_CACCACTAGTTGCAGG	Background
CID44041_CATCAGACAACACCTA	Background
CID44041_CATGGCGTCCGCGTTT	Background
CID44041_CCTAGCTGTACTTCTT	High-Risk
CID44041_CCTCTGACATCCCATC	Background
CID44041_CGCTGGAGTCAATGTC	Background
CID44041_CTACACCCATCCTAGA	Background
CID44041_GAATAAGTCTCTTATG	Background
CID44041_GATGCTATCACTTATC	Background
CID44041_GCGGGTTTCTACTTAC	Background
CID44041_GTCTTCGGTATAATGG	Background
CID44041_GTGCTTCAGGATGGTC	Background
CID44041_GTTCATTCAGGTCCAC	Background
CID44041_TAAGTGCGTTGCTCCT	Background
CID44041_TATCAGGCATGCTGGC	Background
CID44041_TCGGGACTCCCGACTT	Background
CID44041_TCTTCGGGTCGGCTCA	Background
CID44041_TGCCCATAGCGTCAAG	Background
CID44041_TGGCGCACACGGCCAT	Background
CID44041_TGTATTCTCCTGTACC	Background
CID44041_TGTTCCGAGCGGATCA	Background
CID44041_AAACCTGAGCGTAGTG	Background
CID44041_AAGTCTGAGTCTCCTC	Background
CID44041_AATCCAGGTGATGTGG	Background
CID44041_ACACCAATCAGTGTTG	Background
CID44041_ACAGCTACAGACACTT	Background
CID44041_ACGATGTCATGTCCTC	Background
CID44041_ACGGGTCTCGCAAGCC	Background
CID44041_ACTATCTGTTCCAACA	Background
CID44041_ACTTACTAGACAAGCC	High-Risk
CID44041_ACTTTCAAGCTCCCAG	Background
CID44041_AGCATACTCCCAGGTG	Background
CID44041_AGTAGTCGTCAAGCGA	Background
CID44041_AGTAGTCTCCTCAATT	Background
CID44041_AGTCTTTCAAACTGCT	Background
CID44041_ATAAGAGGTTCAGGCC	Background
CID44041_ATAGACCTCCAGGGCT	Background
CID44041_ATCCACCGTAGAGCTG	High-Risk
CID44041_ATTCTACGTTCATGGT	Background
CID44041_CAAGGCCTCACCAGGC	Background
CID44041_CACACCTCAGTCGATT	Background
CID44041_CACAGGCCATCTCGCT	High-Risk
CID44041_CACCTTGAGACTAGAT	Background
CID44041_CCACCTATCAGAAATG	Background
CID44041_CCAGCGACAGCCAATT	Background
CID44041_CCAGCGATCATTATCC	Background
CID44041_CCATGTCGTATAGTAG	Background
CID44041_CCGTACTTCGTCGTTC	Background
CID44041_CCGTGGAGTCTCACCT	Background
CID44041_CCTATTAGTCACTTCC	High-Risk
CID44041_CGATGGCCATCGGAAG	Background
CID44041_CGATTGACATATACGC	Background
CID44041_CGGAGTCAGTGATCGG	Background
CID44041_CGGAGTCTCCGAATGT	Background
CID44041_CGGCTAGCACAGATTC	Background
CID44041_CTCATTATCAGGTAAA	Background
CID44041_CTCTGGTTCCTCAATT	Background
CID44041_CTGAAGTCAGATTGCT	Background
CID44041_CTTCTCTCAATCTGCA	Background
CID44041_GAACCTAAGATCTGAA	Background
CID44041_GACGCGTTCATCGATG	Background
CID44041_GACGTTAAGCTAGTTC	Background
CID44041_GACGTTAAGGGCTTCC	Background
CID44041_GATTCAGAGTACCGGA	Background
CID44041_GCAGCCATCTTGCATT	Background
CID44041_GCAGTTATCCACGAAT	Background
CID44041_GCATACAGTTACAGAA	Background
CID44041_GCATGATGTGACGCCT	Background
CID44041_GCTGCGACACACCGCA	Background
CID44041_GGACATTAGGGTCGAT	Background
CID44041_GGATGTTTCTGTACGA	Background
CID44041_GGGCACTCAACAACCT	Background
CID44041_GGGTTGCGTGCACGAA	Background
CID44041_GTCTCGTAGCCTCGTG	Background
CID44041_GTGTGCGTCCGCGGTA	Background
CID44041_GTTCGGGAGAAACCAT	Background
CID44041_GTTTCTACATGGGAAC	Background
CID44041_TAAGAGATCCCACTTG	Background
CID44041_TAGAGCTTCGTACGGC	Background
CID44041_TATCAGGAGGATGGAA	Background
CID44041_TCAACGATCCTAAGTG	Background
CID44041_TCAGCAACAATCCGAT	Background
CID44041_TCCACACTCAGCTGGC	Background
CID44041_TCGAGGCGTGCGCTTG	Background
CID44041_TCGAGGCTCCACGTGG	Background
CID44041_TGCCCTACATATACGC	Background
CID44041_TGGGCGTCAGGGTTAG	Background
CID44041_TGTCCCAAGCGTAGTG	Background
CID44041_TTAACTCTCTGTGCAA	Background
CID44041_TTGCCGTCACTCTGTC	Background
CID44041_TTTATGCGTTGTACAC	Background
CID44041_TTCGGTCCAGACGCAA	High-Risk
CID44041_AAAGCAACAAATACAG	Background
CID44041_ACTGAACGTTACGGAG	Background
CID44041_CGAGCCATCGTCTGCT	Background
CID44041_GGGCATCTCCAATGGT	Background
CID44041_ACAGCCGCATGCCCGA	Background
CID44041_ATTATCCCATTCGACA	Background
CID44041_CCAATCCTCATCGATG	Background
CID44041_CCATGTCTCCCTCTTT	Background
CID44041_CTGATCCTCTCCTATA	High-Risk
CID44041_TCTCATACAGGGTACA	Background
CID44041_CCTTTCTAGCAGCCTC	Background
CID44041_AATCCAGGTTGTCTTT	Background
CID44041_AGAGCGATCAATCTCT	High-Risk
CID44041_CACACTCAGTTCGCAT	Background
CID44041_AACCATGTCTTGCATT	Background
CID44041_AATCGGTCAGGCTCAC	Background
CID44041_ACAGCTAAGCGTTTAC	Background
CID44041_CAGCTGGTCTACCTGC	Background
CID44041_CAGGTGCCAGTAGAGC	Background
CID44041_CCACGGATCCGAACGC	High-Risk
CID44041_CCCATACTCGCCTGTT	High-Risk
CID44041_CGCGGTATCAGTCCCT	Background
CID44041_CTCACACGTCTCTCGT	Background
CID44041_GACGTGCTCCGAACGC	Background
CID44041_GACTACATCAGCTGGC	Background
CID44041_GATCGCGCAGGTGCCT	Background
CID44041_GCATGCGAGAGGGATA	Background
CID44041_GTCTTCGGTCGCGTGT	Background
CID44041_TGTGGTAAGAAGGACA	Background
CID44041_CCACTACGTCTCTCTG	High-Risk
CID44041_GCTGGGTTCTATCCCG	Background
CID44041_GGACGTCAGTGAAGTT	High-Risk
CID44041_GGTATTGTCACGGTTA	High-Risk
CID44041_TATGCCCGTTAAAGTG	Background
CID44041_TCGTAGATCGCTGATA	High-Risk
CID44041_TGACTTTAGGCAGGTT	High-Risk
CID44041_AGAGCTTTCACAGGCC	Background
CID44041_CCTCAGTAGATGGGTC	Background
CID44041_AACCATGAGGACATTA	Background
CID44041_GTATTCTCAGGACGTA	Background
CID44041_ACCAGTATCCTAGTGA	Background
CID44041_GACGGCTTCAGCAACT	Background
CID44041_GCATGTACATTTCACT	High-Risk
CID44041_TCAGCTCTCAGCTCTC	Background
CID44041_GTCTTCGGTTGTCTTT	Background
CID44041_ACTGAGTTCTTATCTG	Background
CID44041_AAACCTGAGACAAAGG	Background
CID44041_CGAGCACCACATGACT	Background
CID44041_GTAACGTAGCCTCGTG	Background
CID44041_TTGGCAATCTTATCTG	Background
CID44041_AACACGTCACCGGAAA	Background
CID44041_AACTCTTAGGTGCTAG	Background
CID44041_AACTGGTTCTTCCTTC	Background
CID44041_ACGAGCCAGGTTACCT	Background
CID44041_ACTGCTCGTTATCCGA	Background
CID44041_AGGGTGATCACGAAGG	Background
CID44041_AGGTCCGCAGCTTCGG	Background
CID44041_ATTACTCAGACTAAGT	Background
CID44041_ATTCTACTCTATCCCG	Background
CID44041_CAACCTCTCTTGGGTA	Background
CID44041_CACACAAGTGGTAACG	Background
CID44041_CACACAATCGGGAGTA	Background
CID44041_CAGATCAAGCATGGCA	Background
CID44041_CAGATCATCATGCATG	Background
CID44041_CAGCAGCTCTATCCTA	Background
CID44041_CAGCGACCACGAAATA	Background
CID44041_CAGTCCTCAGCGAACA	Background
CID44041_CATCCACCATGGGACA	Background
CID44041_CATTATCTCCCAACGG	Background
CID44041_CCTACACAGTCAAGCG	Background
CID44041_CCTATTACATATGCTG	Background
CID44041_CCTATTAGTGCACCAC	Background
CID44041_CCTTCCCGTCATACTG	Background
CID44041_CGATCGGCAAGAGTCG	Background
CID44041_CGGACTGGTTTAAGCC	High-Risk
CID44041_CGGGTCACATACAGCT	High-Risk
CID44041_CGTAGGCTCATCTGTT	Background
CID44041_CGTCACTCAGTCCTTC	High-Risk
CID44041_CGTCTACAGAACAACT	Background
CID44041_CTAGCCTCACGGTAGA	Background
CID44041_CTGCCTAAGGGATGGG	Background
CID44041_GAAATGAAGCTAACTC	Background
CID44041_GAATAAGGTACATCCA	Background
CID44041_GAATGAATCTGATACG	Background
CID44041_GACGCGTCATTCCTCG	Background
CID44041_GACGTGCTCTAGAGTC	Background
CID44041_GACGTTAGTAATTGGA	Background
CID44041_GACGTTAGTGGCAAAC	Background
CID44041_GACTACACATTTGCTT	Background
CID44041_GACTACATCCAAATGC	Background
CID44041_GATCGATCACTCTGTC	Background
CID44041_GATCTAGTCGCCAAAT	Background
CID44041_GCAAACTTCTCCAGGG	Background
CID44041_GCACATATCCACTCCA	Background
CID44041_GCAGCCATCAGTTAGC	Background
CID44041_GCATGATGTCTTCTCG	Background
CID44041_GCATGCGTCGCACTCT	Background
CID44041_GCCAAATTCCATGAAC	Background
CID44041_GCGCAGTCAGCTCGCA	Background
CID44041_GCGCAGTTCAGTTAGC	Background
CID44041_GCTGGGTTCGTTTGCC	High-Risk
CID44041_GGCGTGTAGCAATATG	Background
CID44041_GTCAAGTAGCTGAACG	Background
CID44041_GTGGGTCTCCAATGGT	Background
CID44041_TAAGAGACAAAGTGCG	Background
CID44041_TAAGCGTAGATGTGTA	Background
CID44041_TAGACCATCCTGCAGG	Background
CID44041_TAGCCGGTCACGCGGT	Background
CID44041_TCAGGATCAATCACAC	Background
CID44041_TCTTCGGAGAGCTGGT	Background
CID44041_TCTTCGGGTCTGGAGA	Background
CID44041_TGACAACCACACCGCA	Background
CID44041_TGAGCATCACGTGAGA	Background
CID44041_TGAGCCGCAATAAGCA	Background
CID44041_TGCACCTAGAAACCGC	Background
CID44041_TGCTACCAGAGTACAT	Background
CID44041_TGGCGCAGTGAACCTT	Background
CID44041_TGGCTGGCACTGTCGG	Background
CID44041_TGGGCGTAGCTAGGCA	Background
CID44041_TTAACTCGTGGGTATG	Background
CID44041_TTAGGCAGTCAATGTC	Background
CID44041_TTAGTTCTCTGCCAGG	Background
CID44041_TTCTTAGAGTGTCTCA	Background
CID44041_TTGACTTAGGGAACGG	Background
CID44041_TTGCGTCCAGTACACT	Background
CID44041_TTGGCAATCGACCAGC	Background
CID44041_TTTATGCCACTTGGAT	Background
CID44041_AGTTGGTTCAAACCAC	Background
CID44041_ATTTCTGAGTCGATAA	Background
CID44041_CATATTCTCACCGTAA	Background
CID44041_CATCAAGAGGCTAGGT	Background
CID44041_CGAACATCAAGAAAGG	Background
CID44041_ATTGGTGAGTATTGGA	Background
CID44041_CTGCCTACAACCGCCA	Background
CID44041_AACTGGTGTAAGTGGC	Background
CID44041_ACGGAGAAGTCCAGGA	Background
CID44041_ACGTCAAGTAGAAAGG	Background
CID44041_CACACTCGTCCGTGAC	Background
CID44041_CACAGTATCTGTTTGT	Background
CID44041_CATCGGGTCCGTTGCT	Background
CID44041_CCACTACGTACTTCTT	Background
CID44041_CGAGAAGTCGGTGTCG	Background
CID44041_CGTAGGCCAGTAGAGC	Background
CID44041_CTAATGGTCGGCGCTA	Background
CID44041_CTCTACGCATTAGGCT	Background
CID44041_CTTCTCTGTCGACTAT	Background
CID44041_GATCGCGCATAGACTC	Background
CID44041_GCGACCATCGTTTAGG	Background
CID44041_GCTGCTTCAGGGCATA	Background
CID44041_GCTTCCAAGAGTTGGC	Background
CID44041_TTGGCAAGTAAACCTC	Background
CID44041_CAACCAACAGGGTACA	Background
CID44041_CTGCTGTTCCTGCAGG	Background
CID44041_CGATGTAGTGGCGAAT	Background
CID44041_AGATTGCCACAACGCC	Background
CID44041_CACACTCAGGTGCTTT	Background
CID44041_CGACTTCAGGGAACGG	Background
CID44041_TCACAAGGTAGAAGGA	Background
CID44041_GAACCTACAAGGACTG	Background
CID44041_CGCGTTTAGCTGAACG	Background
CID44041_AAACGGGAGAGAGCTC	High-Risk
CID44041_AACGTTGAGAACAATC	High-Risk
CID44041_ACGATACAGTCTTGCA	Background
CID44041_AGCAGCCGTCCGCTGA	Background
CID44041_CATATGGCATCCGCGA	High-Risk
CID44041_CGACCTTGTGTCCTCT	Background
CID44041_CGCGGTAAGCTAACAA	Background
CID44041_GCATGTACACCAGGTC	Background
CID44041_TACCTTAAGAGGTTGC	High-Risk
CID44041_TATCTCATCACGCATA	Background
CID44041_TTTGCGCGTGAGGGTT	High-Risk
CID44041_CCTTTCTGTGTTTGGT	High-Risk
CID44041_TTGTAGGAGCGTTCCG	Background
CID44041_AAAGATGTCTCAAGTG	Background
CID44041_CGAGAAGGTCCCGACA	Background
CID44041_TAAACCGGTCATTAGC	Background
CID44041_ACTGAACCACAGCGTC	Background
CID44041_AGCCTAAGTGCAACTT	Background
CID44041_AGGCCGTCATTGTGCA	Background
CID44041_CAGCCGAAGTGCGTGA	Background
CID44041_CGACCTTGTCAGCTAT	Background
CID44041_CTCATTACAATCACAC	Background
CID44041_GTATTCTAGCACCGTC	Background
CID44041_TCTCATAAGGAGTACC	Background
CID44041_TGGTTAGAGGCTCAGA	Background
CID44041_TTCTACACACATTCGA	Background
CID44041_TTGAACGGTGAAATCA	Background
CID44041_CTCATTAGTTGGGACA	Background
CID44041_GAACCTATCGGTCTAA	Background
CID44041_TACAGTGTCAGTACGT	Background
CID44041_GCCTCTAGTAAGCACG	Background
CID44041_TGATTTCCAAACGTGG	Background
CID44041_GACTAACTCTGACCTC	Background
CID44041_GATGAGGTCACGATGT	Background
CID44041_TATCTCACACGTCAGC	Background
CID44041_AAGCCGCCAACTTGAC	Background
CID44041_CTAGTGATCTCCCTGA	Background
CID44041_TGCCCTAAGTCTCCTC	Background
CID44041_ACGTCAATCACGGTTA	Background
CID44041_CTTAGGATCCCTGACT	Background
CID44041_ATCCGAACAAAGCGGT	Background
CID44041_CGATGGCGTCTGGAGA	Background
CID44041_GGGAGATGTAGCCTCG	Background
CID44041_CATCGAACATTATCTC	Background
CID44041_GATCGTACACCATGTA	Background
CID44041_AAGTCTGGTTCAGACT	Background
CID44041_CGGGTCAGTCCATGAT	Background
CID44041_GGCCGATGTTAAGATG	Background
CID44041_TCGGGACTCCGATATG	High-Risk
CID44041_CCCATACGTACAGTTC	Background
CID44041_GTAGGCCTCATACGGT	Background
CID44041_CCTCAGTCAGATAATG	Background
CID44041_GGTATTGGTACCATCA	Background
CID44041_TAGCCGGCAATCGGTT	Background
CID44041_TGCTGCTGTTAAAGTG	Background
CID44041_ACATCAGCATCAGTCA	Background
CID44041_TGAGAGGGTTTGGCGC	Background
CID44041_CCGTTCAAGTGGGATC	Background
CID44041_CACACCTTCGTGTAGT	Background
CID44041_CTGCTGTTCGGTTAAC	High-Risk
CID44041_GCATGATGTTCCCTTG	Background
CID44041_GTGAAGGTCGGAAACG	Background
CID44041_TCAGGATTCGTACCGG	High-Risk
CID44041_TCTCTAACAGTACACT	Background
CID44041_CATCGGGTCCGTCATC	Background
CID44041_CTAGAGTGTCATATCG	Background
CID44041_GCTGCTTTCAGAGCTT	Background
CID44041_GGACGTCGTATAGGTA	Background
CID44041_GGTGTTAAGGTTACCT	Background
CID44041_TGGTTCCTCAGAAATG	Background
CID44041_AGACGTTTCGTTTAGG	High-Risk
CID44041_CAGCGACTCTACGAGT	Background
CID44041_GCTGCGAGTTGTGGAG	Background
CID44041_TGACTAGGTGACCAAG	Background
CID44041_TTGGCAATCGTCTGCT	Background
CID44041_CAAGATCAGCAGACTG	Background
CID44041_CCGTACTAGCAGATCG	Background
CID44041_CTGTTTAAGGCTAGCA	Background
CID44041_GCATGCGCAACTGGCC	Background
CID44041_GCGCAGTTCTAACTTC	High-Risk
CID44041_AACGTTGAGTTTAGGA	Background
CID44041_TGGGAAGCATGGAATA	Background
CID44041_GCTGCGAAGGGTCTCC	Background
CID44041_GTGTTAGGTTCTGGTA	High-Risk
CID44041_CCTCAGTAGGGCACTA	Background
CID44041_CTGATAGAGCTAGTTC	Background
CID44041_GCTTCCATCACAGGCC	Background
CID44041_TTCTCAACAAGACACG	Background
CID44041_CGGACTGTCCTCAATT	High-Risk
CID44041_GTCGGGTCAGGCTGAA	Background
CID44041_TTTACTGAGACCTTTG	Background
CID44041_CCACTACTCGGTCTAA	Background
CID44041_ACACCCTGTTCCACTC	Background
CID44041_ACCGTAACAAGAGTCG	Background
CID44041_CCGTTCATCCGCATCT	Background
CID44041_TATTACCCACTAGTAC	Background
CID44041_AGCGGTCGTTATGCGT	Background
CID44041_CACACAACAGCGAACA	Background
CID44041_TCAACGAGTCTCTTAT	Background
CID44041_ACGCCAGCAAATCCGT	Background
CID44041_AGAATAGTCCTTAATC	Background
CID44041_ATAACGCTCATGGTCA	Background
CID44041_GACCTGGCAATAGAGT	Background
CID44041_TCGTAGATCTACTTAC	Background
CID44041_GTCTCGTTCGAGAACG	Background
CID44041_ACGAGCCGTCCTCTTG	Background
CID44041_GGAAAGCTCCGTACAA	Background
CID44041_GTTCATTCAGACGCAA	Background
CID44041_AAAGTAGCATTACGAC	Background
CID44041_AGCCTAAGTATGAAAC	Background
CID44041_AGCGTCGGTTACGCGC	Background
CID44041_AGCTTGACAACTGGCC	Background
CID44041_AGGGAGTGTGCACTTA	Background
CID44041_CACCAGGCACATGACT	Background
CID44041_CAGAGAGTCCGAATGT	Background
CID44041_CCATGTCAGCGTAATA	Background
CID44041_CCGGTAGTCGGAGGTA	Background
CID44041_CCTTTCTTCGCGTAGC	Background
CID44041_CGACCTTAGACAGACC	Background
CID44041_CGACTTCCAGTAAGCG	Background
CID44041_CGAGCACAGCATCATC	Background
CID44041_CGGCTAGTCTTTACGT	Background
CID44041_CTCGAGGCATCGATTG	Background
CID44041_CTTTGCGGTCAAAGAT	Background
CID44041_GCACTCTGTGGTCCGT	Background
CID44041_GCGAGAAGTCTTTCAT	Background
CID44041_GCTGGGTCAAGTCTGT	Background
CID44041_GTCACAAAGTACCGGA	Background
CID44041_GTCTCGTCAAGCCCAC	Background
CID44041_TGCCAAACAAGTACCT	Background
CID44041_TGCCCTACAATGAAAC	Background
CID44041_TGCGCAGGTTAAAGTG	Background
CID44041_TGTATTCTCGATGAGG	Background
CID44041_TTGTAGGTCTCTGAGA	Background
CID44041_AGCTTGAGTCCCTACT	Background
CID44041_GCATACAGTGTATGGG	Background
CID44041_GTCCTCAAGCACAGGT	Background
CID44041_TAGAGCTAGGATCGCA	Background
CID44041_TCGAGGCAGAATCTCC	Background
CID44041_AGCTCTCTCACCGGGT	Background
CID44041_AGTGTCAGTCAACTGT	Background
CID44041_CATGCCTCATTTCAGG	Background
CID44041_GTTCTCGAGGCTAGGT	Background
CID44041_TGACGGCCAGCTATTG	Background
CID44041_TGGCCAGGTCTTGTCC	Background
CID44041_CTACATTTCTCCGGTT	Background
CID44041_GTACTTTTCGCCGTGA	Background
CID44041_ACTTACTAGTCAATAG	Background
CID44041_AGAGTGGTCGCAAGCC	Background
CID44041_AGCAGCCGTCACCCAG	Background
CID44041_ATAACGCCAGACAAGC	Background
CID44041_CACAGTATCACATACG	Background
CID44041_CATTATCCAATCCGAT	Background
CID44041_CATTCGCCAGTACACT	Background
CID44041_CCCAATCCAAGGCTCC	Background
CID44041_CTCTGGTGTAAATGAC	Background
CID44041_GACTGCGAGTACGACG	Background
CID44041_GGACAAGAGATCCTGT	Background
CID44041_GGATGTTCACATGTGT	Background
CID44041_GGTGCGTAGAGCTGCA	Background
CID44041_GTAACTGAGACAAAGG	Background
CID44041_GTAACTGCAACGCACC	Background
CID44041_GTAGGCCGTCTTGATG	Background
CID44041_TCAATCTTCCGTCATC	Background
CID44041_TCACAAGAGGCTCAGA	Background
CID44041_TCACGAAAGGCCCTTG	Background
CID44041_TCAGCTCGTAGATTAG	Background
CID44041_TCGGGACAGCAATATG	Background
CID44041_TCTGGAAGTCATATGC	Background
CID44041_TGAAAGACACGCTTTC	Background
CID44041_TGAGAGGGTTATCACG	Background
CID44041_TTATGCTTCTCGATGA	Background
CID44041_TTGACTTGTAGCCTAT	Background
CID44041_TTTGCGCGTTCCGGCA	Background
CID44041_AATCGGTTCCAGAGGA	Background
CID44041_CAGCTAAGTCTTGTCC	Background
CID44041_CATCGGGCATAGTAAG	Background
CID44041_CATGACAGTCAAAGCG	Background
CID44041_CGTTCTGGTCAACTGT	Background
CID44041_CTGCCTATCTGTTGAG	Background
CID44041_GTTAAGCGTTAAGACA	Background
CID44041_CTCATTACATCCGGGT	Background
CID44041_AGGTCCGCACGAGAGT	Background
CID44041_GCTGCTTCATTCTCAT	Background
CID44041_TGCCAAAGTTGTACAC	Background
CID44041_TGTATTCCAGACGCTC	Background
CID44041_CCTTTCTCAGCCTTTC	Background
CID44041_GACGTGCTCTCTGCTG	High-Risk
CID44041_GTTTCTACAGCCTGTG	High-Risk
CID44041_GCTGCGAAGAGCCTAG	Background
CID44041_GGCGTGTCAATGAAAC	Background
CID44041_TCGGTAAGTGTGAATA	Background
CID44041_CATGGCGAGATCTGAA	Background
CID44041_TTTGTCACAATGGATA	Background
CID44041_AGCGTCGGTTTAGGAA	Background
CID44041_GAGCAGAGTGGCCCTA	Background
CID44041_TATCAGGGTAAAGGAG	Background
CID44041_TGCCCATAGGCCCGTT	Background
CID44041_CTTAACTTCGGATGGA	Background
CID44041_AACTCCCCATCTCCCA	Background
CID44041_AAGGTTCAGGCAGGTT	Background
CID44041_ACGATACGTTACGTCA	Background
CID44041_ACGGGCTGTGAAAGAG	Background
CID44041_ACTATCTTCCCTTGCA	Background
CID44041_ACTTTCAAGAAACGCC	Background
CID44041_ACTTTCATCTAGAGTC	Background
CID44041_AGCAGCCGTAGCGATG	Background
CID44041_AGGGAGTTCGTGGGAA	Background
CID44041_AGGGTGACATCGGACC	Background
CID44041_AGTAGTCAGAGAGCTC	Background
CID44041_ATAACGCTCTGCCCTA	Background
CID44041_ATCACGACACAAGACG	Background
CID44041_ATCCACCTCACATACG	Background
CID44041_ATCCACCTCAGTGCAT	Background
CID44041_ATTATCCTCCTCCTAG	Background
CID44041_CACATAGTCAGCGACC	Background
CID44041_CAGCCGACATGTCGAT	Background
CID44041_CAGGTGCCATCGGTTA	Background
CID44041_CATCAAGAGACTTGAA	Background
CID44041_CATGACATCAACACGT	Background
CID44041_CGGACTGGTAAATGTG	Background
CID44041_CGGAGCTGTGATGTCT	Background
CID44041_CGTCTACCAGTGGAGT	Background
CID44041_CGTGAGCCATATGAGA	Background
CID44041_CTGCTGTCACGTTGGC	Background
CID44041_GAACGGACATACTACG	Background
CID44041_GAATAAGTCTTGCCGT	Background
CID44041_GACAGAGCAATACGCT	Background
CID44041_GACGCGTAGTACGATA	Background
CID44041_GATGAGGTCAGTTCGA	Background
CID44041_GCACTCTAGTTCCACA	Background
CID44041_GCGCCAATCTACCTGC	Background
CID44041_GGCTCGAGTGAAATCA	Background
CID44041_GGGAGATGTTTGTGTG	Background
CID44041_GGTGTTAAGGGTCTCC	Background
CID44041_GTAACGTAGTTGCAGG	Background
CID44041_TACCTTACACTGTCGG	Background
CID44041_TCGGGACTCGTCTGAA	Background
CID44041_TGAAAGAAGGAGTTTA	Background
CID44041_TGCCAAATCAGCATGT	Background
CID44041_TGCGGGTTCGTCCAGG	Background
CID44041_TGGCTGGCAGCTGTGC	Background
CID44041_TTAGGCACATGGTAGG	Background
CID44041_TTGTAGGCAGCTCGAC	Background
CID44041_AACCATGAGCCAACAG	Background
CID44041_AACCATGCATGAGCGA	Background
CID44041_AAGGAGCGTACGAAAT	Background
CID44041_ACAGCCGTCTGTACGA	Background
CID44041_ACGATACCATGCAATC	Background
CID44041_ACGCCGATCAACCAAC	Background
CID44041_ACTGAACAGTGTACTC	Background
CID44041_AGAGCTTCAAAGGAAG	High-Risk
CID44041_AGCATACGTGGTGTAG	Background
CID44041_ATAGACCAGCCGGTAA	Background
CID44041_ATCGAGTGTTCCCGAG	Background
CID44041_CAAGATCTCCGTTGCT	Background
CID44041_CACAAACAGTGTGGCA	Background
CID44041_CAGATCAGTGCACTTA	Background
CID44041_CAGCGACAGGTTCCTA	Background
CID44041_CATATGGAGTTAGCGG	Background
CID44041_CATCCACCAATGGATA	Background
CID44041_CATGACAAGACTAAGT	Background
CID44041_CCACGGAAGGGAGTAA	Background
CID44041_CCACTACAGAAGGCCT	Background
CID44041_CCTACCACAGATCGGA	Background
CID44041_CCTCAGTTCCAGGGCT	Background
CID44041_CGAATGTTCAAAGACA	Background
CID44041_CGAGCCAGTCAATACC	Background
CID44041_CGCTATCTCTGTTGAG	Background
CID44041_CGTAGGCGTGAAGGCT	Background
CID44041_CGTCCATGTCATTAGC	Background
CID44041_CTCCTAGGTACGCTGC	Background
CID44041_CTTCTCTGTCTAAACC	Background
CID44041_GACGTGCCAAAGCGGT	Background
CID44041_GTACTTTTCTGCCAGG	Background
CID44041_GTCGGGTCACATGACT	Background
CID44041_GTGGGTCGTCGCGGTT	Background
CID44041_TACCTTACAGTTCCCT	Background
CID44041_TGCGGGTGTCGCTTCT	Background
CID44041_TGGCGCAGTCTGCCAG	Background
CID44041_TGTTCCGTCTTAGCCC	Background
CID44041_TTGGCAAGTACTCAAC	Background
CID44041_TTTGTCACACATCTTT	Background
CID44041_ACGCCGAGTTAGAACA	Background
CID44041_ACTTGTTTCGTCCAGG	Background
CID44041_ATCTACTGTCGGCATC	Background
CID44041_GAACGGACACGAGAGT	Background
CID44041_GTGCAGCAGACACTAA	Background
CID44041_TAGAGCTTCAGCTTAG	Background
CID44041_TGAGGGAAGATCCCGC	Background
CID44041_ATTCTACAGCTAGGCA	Background
CID44041_CTAAGACGTATATCCG	Background
CID44041_GGATTACAGAGTGACC	Background
CID44041_TCTCATAAGCCACGTC	Background
CID44041_CCGGGATCAATGGAAT	Background
CID44041_ACACTGAGTAAACACA	Background
CID44041_CATCCACGTCGACTGC	Background
CID44041_CGCTGGAAGTTGAGTA	Background
CID44041_CGGACGTGTACTTCTT	Background
CID44041_CTAACTTCACTGTGTA	Background
CID44041_GGGAGATTCAAGGCTT	Background
CID44041_TAAGTGCTCGGTGTCG	Background
CID44041_TGGTTAGAGGCCGAAT	Background
CID44041_CGATCGGAGAATGTGT	Background
CID44041_AAACCTGCAAGACACG	Background
CID44041_AAAGCAAGTCATACTG	Background
CID44041_AACCATGTCGGCGCAT	Background
CID44041_AATCCAGTCTCGTATT	Background
CID44041_ACATACGGTTAAGTAG	Background
CID44041_ACCTTTACAAGTCTGT	Background
CID44041_ACGAGCCCACAGGTTT	Background
CID44041_ACGGAGAAGGTAAACT	Background
CID44041_ACGGGCTAGGTTACCT	High-Risk
CID44041_AGCGTATGTACTTCTT	Background
CID44041_AGGCCGTTCAGATAAG	High-Risk
CID44041_AGGTCATAGGCCATAG	Background
CID44041_ATGGGAGCACAACGTT	High-Risk
CID44041_CAAGGCCCAGTAAGCG	High-Risk
CID44041_CACTCCAAGCATGGCA	High-Risk
CID44041_CAGAATCCATCCGTGG	Background
CID44041_CAGCGACTCATGTCCC	Background
CID44041_CATCGAAGTTCCAACA	Background
CID44041_CCATTCGGTGGGTATG	High-Risk
CID44041_CCTACCAAGAATGTGT	Background
CID44041_CGACCTTTCTCCCTGA	Background
CID44041_CGAGCCACAAAGGTGC	High-Risk
CID44041_CGGAGCTTCATCACCC	Background
CID44041_CGGAGTCAGATCCGAG	Background
CID44041_CGTAGCGCACCGATAT	High-Risk
CID44041_CGTTCTGGTTATGCGT	Background
CID44041_CTACCCAAGTGCTGCC	High-Risk
CID44041_CTACGTCGTGTTCTTT	High-Risk
CID44041_CTCATTACACTGTCGG	Background
CID44041_CTCGAAACAAGCTGAG	Background
CID44041_CTCGGGACAAGAGTCG	Background
CID44041_CTGTGCTAGCTGTCTA	High-Risk
CID44041_GACCTGGGTCATATGC	Background
CID44041_GATTCAGCAGCCTTTC	Background
CID44041_GCAATCATCGTCCAGG	Background
CID44041_GCATGCGTCCCGGATG	Background
CID44041_GCGCAACTCTTGAGAC	Background
CID44041_GCGGGTTTCATCTGTT	Background
CID44041_GCTCCTACACAGACAG	Background
CID44041_GCTGGGTAGATAGCAT	Background
CID44041_GGACAAGAGTTACCCA	Background
CID44041_GGACGTCTCGATAGAA	Background
CID44041_GGCGACTAGAGCTGGT	Background
CID44041_GTCGTAATCTCTTATG	Background
CID44041_GTTACAGAGTCATGCT	Background
CID44041_GTTTCTAGTACTCTCC	Background
CID44041_TACAGTGCAATGGAGC	Background
CID44041_TACTCGCTCAGGATCT	Background
CID44041_TATGCCCGTAGCGTAG	Background
CID44041_TCAACGAGTCACTGGC	High-Risk
CID44041_TCTGAGAAGGAATGGA	Background
CID44041_TGACGGCAGAATGTTG	Background
CID44041_TGAGCATGTAGTGAAT	Background
CID44041_TGAGCCGTCAACACCA	Background
CID44041_TGCACCTAGAAGGTGA	Background
CID44041_TGGGAAGCATAGACTC	Background
CID44041_TGGTTCCCACATGTGT	Background
CID44041_TGTCCCAAGAAAGTGG	Background
CID44041_TTAGTTCCATCTACGA	Background
CID44041_TTGGAACCATATGGTC	Background
CID44041_TTGGAACTCGGCCGAT	Background
CID44041_TTTACTGCAGACGCCT	Background
CID44041_CTCGAGGCACAAGTAA	Background
CID44041_TGGCGCATCGCAAGCC	Background
CID44041_TGTATTCGTTCAACCA	High-Risk
CID44041_ACTGAACCATAACCTG	Background
CID44041_AAATGCCTCTGCTTGC	Background
CID44041_ATCCACCAGAATGTTG	Background
CID44041_CATCAAGGTAAACACA	Background
CID44041_TAGTTGGCATGCCTTC	Background
CID44041_TGAGAGGCATGTTGAC	Background
CID44041_AAACCTGAGGCTACGA	Background
CID44041_AACTCCCCACACTGCG	High-Risk
CID44041_ACCCACTGTCGACTGC	High-Risk
CID44041_ACGGGCTCACAGATTC	Background
CID44041_AGCTCTCTCCAAACAC	High-Risk
CID44041_AGCTTGATCCATGAGT	High-Risk
CID44041_CAGCAGCGTCGCATAT	High-Risk
CID44041_CATATTCGTGATAAGT	High-Risk
CID44041_CATCCACGTTCGCGAC	High-Risk
CID44041_CCGGTAGCACGGTAAG	Background
CID44041_CGCTTCATCTGCCCTA	Background
CID44041_GGGTTGCAGAAAGTGG	High-Risk
CID44041_GTCGGGTTCTCGTATT	Background
CID44041_TAGAGCTAGGTAAACT	High-Risk
CID44041_TGCGCAGTCAGCATGT	High-Risk
CID44041_TGGGAAGTCTGCAAGT	High-Risk
CID44041_TTAGGCAGTTGCGTTA	High-Risk
CID44041_TTCTCCTTCTACCAGA	Background
CID44041_CTTACCGCATCAGTCA	Background
CID44041_CACCAGGTCCATGAGT	High-Risk
CID44041_TGCCCATCACCGAATT	Background
CID44041_AAGCCGCGTAGTACCT	Background
CID44041_ACGAGGACACCTATCC	High-Risk
CID44041_ACTTGTTCAATCGAAA	High-Risk
CID44041_ACTTTCAGTCATGCAT	High-Risk
CID44041_CCTAAAGAGTCCCACG	Background
CID44041_CTAAGACAGTGGAGAA	High-Risk
CID44041_GACCAATTCAACCATG	High-Risk
CID44041_GTTACAGAGGCTACGA	High-Risk
CID44041_TGAGCATAGCCCAGCT	Background
CID44041_AACTCAGCACATGGGA	High-Risk
CID44041_ACCTTTAGTACCGTTA	High-Risk
CID44041_ACTTTCATCCGCGCAA	High-Risk
CID44041_AGCATACAGATCCCGC	High-Risk
CID44041_AGCATACCATGGATGG	Background
CID44041_AGCTCCTAGAGCTGGT	Background
CID44041_AGCTCCTTCGCCGTGA	High-Risk
CID44041_AGGTCATGTCCGAACC	Background
CID44041_AGTGTCATCTGGAGCC	High-Risk
CID44041_CAACCAACAGGACGTA	High-Risk
CID44041_CAGATCAAGTAACCCT	Background
CID44041_CCACCTAAGTTGTAGA	High-Risk
CID44041_CGGAGTCAGAGCCCAA	High-Risk
CID44041_GACTGCGAGCTGGAAC	High-Risk
CID44041_GATCAGTGTAGCTCCG	Background
CID44041_GCTTCCACATGCGCAC	High-Risk
CID44041_GTAACTGTCGAACTGT	High-Risk
CID44041_GTATTCTCATCAGTCA	High-Risk
CID44041_GTGGGTCTCTCTGTCG	High-Risk
CID44041_GTTCTCGGTGACGGTA	High-Risk
CID44041_TATCTCAGTCGAGATG	High-Risk
CID44041_TCGCGAGCAGTTCATG	High-Risk
CID44041_TCGTACCGTAAATGTG	High-Risk
CID44041_TCTGAGACAGACGCTC	High-Risk
CID44041_TCTTCGGCACCCATTC	High-Risk
CID44041_TGGCCAGAGGCTAGAC	Background
CID44041_TGGTTAGCACCGCTAG	Background
CID44041_CAAGAAACAATGAAAC	Background
CID44041_AAGTCTGAGGGCTCTC	Background
CID44041_ACGATGTAGGATATAC	Background
CID44041_CGAGAAGCAGGGATTG	Background
CID44041_CGTTGGGGTCTAGTCA	Background
CID44041_GGGAGATTCAGCATGT	Background
CID44041_ACGAGCCGTCCAAGTT	Background
CID44041_AGCTCCTCAGCGTCCA	Background
CID44041_AGGCCGTAGGTGATTA	Background
CID44041_AGTTGGTCAGCGATCC	Background
CID44041_ATCTGCCGTGACAAAT	Background
CID44041_CAAGATCTCGCAAACT	Background
CID44041_CAGAATCCAGGGAGAG	Background
CID44041_CATCGAAGTTTAGCTG	Background
CID44041_CATTCGCAGGTGGGTT	Background
CID44041_CCTCAGTCACGCGAAA	Background
CID44041_CCTCTGAAGTGTTAGA	Background
CID44041_GACTGCGCACCATGTA	Background
CID44041_GATGAAAAGCTGATAA	Background
CID44041_GCTGCAGAGTATTGGA	Background
CID44041_GCTGCAGGTGGTAACG	Background
CID44041_GGAACTTGTCGCCATG	Background
CID44041_GGATGTTAGCCTATGT	Background
CID44041_GGCAATTTCGACAGCC	Background
CID44041_GGGCACTCATCACGTA	Background
CID44041_GTGCAGCCAGGCGATA	Background
CID44041_GTTTCTAAGTCTCCTC	Background
CID44041_TCAGGTAGTTCTGTTT	Background
CID44041_TCATTTGTCACCGTAA	Background
CID44041_TCGCGTTCACCGATAT	Background
CID44041_TCTGAGATCAGTTAGC	Background
CID44041_TTATGCTAGTACGCCC	Background
CID44041_TTGGCAAGTAAAGGAG	Background
CID44041_TTGTAGGAGAGTTGGC	Background
CID44041_AAACCTGCATGAACCT	Background
CID44041_AACGTTGAGCTACCTA	Background
CID44041_AACTCAGCAGGGATTG	Background
CID44041_AACTCTTGTTCCGTCT	Background
CID44041_AAGGAGCTCGGCCGAT	Background
CID44041_AAGGCAGAGCTCCCAG	Background
CID44041_ACGGGTCAGTAACCCT	Background
CID44041_ACGGGTCCAACACGCC	Background
CID44041_ACTGAACTCCTTTACA	Background
CID44041_ACTGATGAGTGGGATC	Background
CID44041_ACTGCTCAGATAGGAG	Background
CID44041_AGCAGCCAGAAAGTGG	Background
CID44041_AGGTCATCACCTTGTC	Background
CID44041_ATAACGCAGATCCTGT	Background
CID44041_ATGGGAGGTAGCGTGA	Background
CID44041_ATTTCTGAGAAGAAGC	Background
CID44041_CAACCAATCTTCCTTC	Background
CID44041_CAACCTCCAGCGTAAG	Background
CID44041_CAAGATCTCTGACCTC	Background
CID44041_CACATAGTCTGGTGTA	Background
CID44041_CACCTTGTCTTCGAGA	Background
CID44041_CAGAATCAGGGTCTCC	Background
CID44041_CAGCATATCCAATGGT	Background
CID44041_CATATTCCATGCCCGA	Background
CID44041_CCACCTAGTCAACTGT	Background
CID44041_CCTCAGTGTTCCGGCA	Background
CID44041_CGAACATGTGTTGAGG	Background
CID44041_CGCGTTTTCCAAATGC	Background
CID44041_CGCTATCGTCGTCTTC	Background
CID44041_CGGCTAGGTGACTACT	Background
CID44041_CTCGAGGGTCAATACC	Background
CID44041_CTGATCCCAGGCGATA	Background
CID44041_CTGCCTAAGCTTTGGT	Background
CID44041_CTGCTGTGTGTTTGGT	Background
CID44041_CTTAGGATCCAATGGT	Background
CID44041_GCATGCGAGGACAGAA	Background
CID44041_GCTCTGTGTGACTACT	Background
CID44041_GGACAAGAGTTCGCAT	Background
CID44041_GGACGTCTCCCACTTG	Background
CID44041_GGCGACTCACAAGCCC	Background
CID44041_GGGAGATTCCTAGGGC	Background
CID44041_GGGCACTGTGTAAGTA	Background
CID44041_GTAACGTGTCTAAACC	Background
CID44041_GTGTTAGAGCGATTCT	Background
CID44041_TAGCCGGTCTGTCAAG	Background
CID44041_TAGTTGGTCTATGTGG	Background
CID44041_TATCTCAAGGCATGGT	Background
CID44041_TCAACGAAGCCACGCT	Background
CID44041_TCGAGGCTCACATACG	Background
CID44041_TCGTACCCACGAAATA	Background
CID44041_TCTGGAAGTCGCGGTT	Background
CID44041_TCTTCGGCAGCTTCGG	Background
CID44041_TGAGGGACAAGGCTCC	Background
CID44041_TGCCCTATCGATCCCT	Background
CID44041_TGCGCAGAGCGAAGGG	Background
CID44041_TGCGTGGCATCACGTA	Background
CID44041_TGCGTGGTCGGCCGAT	Background
CID44041_TGTGGTAGTCTCCCTA	Background
CID44041_TGTGTTTTCTACTTAC	Background
CID44041_TTCTACATCTGGTTCC	Background
CID44041_TTCTCAACACTGTCGG	Background
CID44041_AAACGGGAGTGTCCCG	Background
CID44041_AGAGTGGGTTACGGAG	Background
CID44041_ATCATCTTCAACGGCC	Background
CID44041_CTGATCCCAAGCTGTT	Background
CID44041_GTGGGTCGTAACGCGA	Background
CID44041_GTTACAGCACAGATTC	Background
CID44041_TTTATGCGTAATAGCA	Background
CID44041_AACACGTTCACCTTAT	Background
CID44041_AACGTTGAGTTAGGTA	Background
CID44041_ACAGCCGTCCGTAGTA	Background
CID44041_ACCAGTATCTTTCCTC	Background
CID44041_ACTGTCCCACACAGAG	Background
CID44041_AGCCTAAAGATCGATA	Background
CID44041_AGTGGGACACCCTATC	Background
CID44041_AGTGTCATCGTTGACA	Background
CID44041_ATAACGCCAAAGCAAT	Background
CID44041_ATCCGAACACCAACCG	Background
CID44041_ATGTGTGAGATGAGAG	Background
CID44041_CAACCAATCGTCCGTT	Background
CID44041_CACCTTGGTAATAGCA	Background
CID44041_CAGTCCTGTCACTGGC	Background
CID44041_CAGTCCTGTTCCCGAG	Background
CID44041_CCGTACTCACTTGGAT	Background
CID44041_CCTATTATCTCCAGGG	Background
CID44041_CGGGTCAGTGGACGAT	Background
CID44041_CTAGTGATCTGCTGCT	Background
CID44041_CTCGTACTCGACCAGC	Background
CID44041_CTCTGGTTCTTCATGT	Background
CID44041_CTTCTCTTCCGCATCT	Background
CID44041_GAAATGAAGTGCTGCC	Background
CID44041_GAAGCAGGTGACCAAG	Background
CID44041_GACGTTATCGACCAGC	Background
CID44041_GATCGTATCTCTTATG	Background
CID44041_GCCTCTAAGGCTCAGA	Background
CID44041_GCGCCAACAGGAATGC	Background
CID44041_GGAACTTCACAGCCCA	Background
CID44041_GGGATGAAGGTGATAT	Background
CID44041_GTACGTACAATCACAC	Background
CID44041_GTGCTTCGTCGAGTTT	Background
CID44041_TAAGTGCTCCAATGGT	Background
CID44041_TACGGGCCATGTTGAC	Background
CID44041_TCAGGTAAGTGAACAT	Background
CID44041_TGCCCATAGCGTTTAC	Background
CID44041_TGCGGGTTCCGCAAGC	Background
CID44041_TGTGTTTAGGATGTAT	Background
CID44041_TTCTTAGAGCTACCGC	Background
CID44041_TTGAACGAGACTAAGT	Background
CID44041_TTGGCAACAGCATACT	Background
CID44041_AAACCTGAGCACACAG	Background
CID44041_AAGACCTTCCGCGCAA	Background
CID44041_ACCCACTTCAACGAAA	Background
CID44041_ACGAGGAAGATGTAAC	Background
CID44041_ACTGCTCAGTAGTGCG	Background
CID44041_ATAACGCGTCTAAAGA	Background
CID44041_ATCCGAACAAGCCGCT	Background
CID44041_ATGGGAGTCGAGAACG	Background
CID44041_CACAAACTCCGAGCCA	Background
CID44041_CAGCATAAGAGCCCAA	Background
CID44041_CATCAGATCTAAGCCA	Background
CID44041_CCCTCCTTCCGTAGTA	Background
CID44041_CCTACACGTTCTGGTA	Background
CID44041_CCTACACTCACATACG	Background
CID44041_CGGACGTTCCTGTAGA	Background
CID44041_CGTCAGGAGGGTATCG	Background
CID44041_CGTTCTGAGCCACCTG	Background
CID44041_CTCACACTCAATCACG	Background
CID44041_CTCTACGGTACTTGAC	Background
CID44041_CTGCCTATCAGTCAGT	Background
CID44041_CTTAGGAGTATCTGCA	Background
CID44041_GACTACAGTCAGAATA	Background
CID44041_GATGAAAAGGGATGGG	Background
CID44041_GATGCTAAGCCGCCTA	Background
CID44041_GCTGGGTCACGGTTTA	Background
CID44041_GCTGGGTGTGCAGGTA	Background
CID44041_GGACGTCCAGACGCAA	Background
CID44041_GGTGTTAGTAGCAAAT	Background
CID44041_GTAGGCCTCGGAGGTA	Background
CID44041_GTTAAGCAGAACAATC	Background
CID44041_GTTAAGCAGACAAAGG	Background
CID44041_TAGTGGTCAGGTCCAC	Background
CID44041_TAGTGGTGTAAACACA	Background
CID44041_TATTACCCAGGGAGAG	Background
CID44041_TCAACGATCGTCACGG	Background
CID44041_TCGTAGATCAGTCCCT	Background
CID44041_TCTTTCCCAAAGTCAA	Background
CID44041_TGGCTGGCAGACGTAG	Background
CID44041_TTTCCTCAGTTAGGTA	Background
CID44041_ATCGAGTCATGACGGA	Background
CID44041_TCAGATGTCTAACGGT	Background
CID44041_ACAGCCGCAGGTCGTC	Background
CID44041_ACGAGCCCAGATAATG	Background
CID44041_ACGCCAGAGTGAACAT	Background
CID44041_ACTGAACAGTGTTGAA	Background
CID44041_AGAGCGAAGCCGGTAA	Background
CID44041_AGCGGTCAGAGCAATT	Background
CID44041_AGCGGTCTCTACCAGA	Background
CID44041_CACAAACCAAAGGCGT	Background
CID44041_CACACAAAGGATATAC	Background
CID44041_CACACAATCCTTGCCA	Background
CID44041_CACAGGCGTGCAACGA	Background
CID44041_CAGTAACGTCGGCATC	Background
CID44041_CATCAGAAGGTTACCT	Background
CID44041_CCACGGATCCTTTCTC	Background
CID44041_CCCAGTTCAAGCGATG	Background
CID44041_CCTCTGATCTTGCATT	Background
CID44041_CGAACATTCGAGAACG	Background
CID44041_CGCTATCCATGCTGGC	Background
CID44041_CGTGTCTAGAGTACAT	Background
CID44041_GAGGTGAAGCGTGAAC	Background
CID44041_GCGCAACCATGCTGGC	Background
CID44041_GCGCAGTTCCAACCAA	Background
CID44041_GCGGGTTGTGCATCTA	Background
CID44041_GCTGGGTTCCCTCTTT	Background
CID44041_GGCTCGATCACAACGT	Background
CID44041_GGTGTTAAGCTAACAA	Background
CID44041_GTATCTTCATCCGCGA	Background
CID44041_GTCTTCGAGGGAGTAA	Background
CID44041_TACACGAAGTATCTCG	Background
CID44041_TAGAGCTCAGCCTGTG	Background
CID44041_TCAACGATCTAACCGA	Background
CID44041_TCCCGATGTTCGGCAC	Background
CID44041_TCGAGGCGTCTTTCAT	Background
CID44041_TGCGCAGGTCCATCCT	Background
CID44041_TGCGGGTGTCCGACGT	Background
CID44041_TGGACGCCATGCTGGC	Background
CID44041_TTATGCTTCTCGAGTA	Background
CID44041_TTTGGTTCACCACGTG	Background
CID44041_TTTGTCAAGTGTGGCA	Background
CID44041_CATGGCGTCGGCTTGG	Background
CID44041_CCTATTAAGAAGGCCT	Background
CID44041_TCAACGAGTTCGGCAC	Background
CID44041_AACGTTGTCTAAGCCA	Background
CID44041_AAGGTTCAGAAGGCCT	Background
CID44041_ACATGGTTCCTAGAAC	Background
CID44041_ACTGAGTAGTTCCACA	Background
CID44041_AGATCTGGTTTAGCTG	Background
CID44041_AGTGGGAGTTCCACTC	Background
CID44041_ATAAGAGAGTAAGTAC	Background
CID44041_ATCACGAAGACCGGAT	Background
CID44041_CAAGAAACATAAAGGT	Background
CID44041_CATCAAGAGTAAGTAC	Background
CID44041_CCGGGATAGAAACCGC	Background
CID44041_CCTATTATCATTATCC	Background
CID44041_CCTCAGTCAGCCTTTC	Background
CID44041_CGGACGTGTGAGGCTA	Background
CID44041_CTACATTGTCTGGAGA	Background
CID44041_CTGATCCTCTACTCAT	Background
CID44041_CTTAACTCAGACGCAA	Background
CID44041_GAAATGAAGCAGCGTA	Background
CID44041_GATCGTACATGCATGT	Background
CID44041_GGTGCGTGTGCACCAC	Background
CID44041_TACAGTGTCATGCTCC	Background
CID44041_TCTGAGACAAACAACA	Background
CID44041_TGCACCTTCACAGTAC	Background
CID44041_TGCGGGTTCACGCATA	Background
CID44041_TGGTTCCGTCTCTCGT	Background
CID44041_TGTGTTTGTCAAAGCG	Background
CID44041_TTATGCTAGTGTACGG	Background
CID44041_TTGGCAACATCAGTCA	Background
CID44041_ACATGGTAGACTCGGA	Background
CID44041_CCTAGCTGTCTTGCGG	Background
CID44041_CGATTGAAGGCCGAAT	Background
CID44041_TAAGAGAGTGTAACGG	Background
CID44041_TGGGCGTGTGATGTGG	Background
CID44041_ACGCCAGCACGTCAGC	Background
CID44041_GGCAATTTCCAGTAGT	Background
CID44041_AACCATGCACCAACCG	Background
CID44041_ACATACGAGCTTCGCG	Background
CID44041_AGACGTTCAGCGTTCG	Background
CID44041_CAAGATCAGCTCTCGG	Background
CID44041_CATCGGGCAGTATGCT	Background
CID44041_CCTTCCCGTTGGTGGA	Background
CID44041_CTTAGGACAGGAACGT	Background
CID44041_TCGCGAGCATCTACGA	Background
CID44041_TTATGCTCACAGGAGT	Background
CID44041_TTGCCGTAGTCATGCT	Background
CID44041_TTGTAGGCAGTCCTTC	Background
CID44041_AACTCTTAGGTGACCA	Background
CID44041_AGAGTGGTCCTCGCAT	Background
CID44041_CAACCTCAGTCCGTAT	Background
CID44041_CGGAGTCTCCAGATCA	Background
CID44041_GACGGCTGTTCATGGT	Background
CID44041_GTAACGTTCGGTTCGG	Background
CID44041_TCAACGAAGGCTAGCA	Background
CID44041_CATGGCGCAAGGTTCT	High-Risk
CID44041_CTCTACGGTTAAGGGC	Background
CID44041_CTGTGCTGTCCTGCTT	Background
CID44041_GACGGCTGTACGAAAT	Background
CID44041_GGACAAGCAGGGCATA	Background
CID44041_GGACATTCAAGAAAGG	Background
CID44041_TGTTCCGGTGCAGGTA	Background
CID44041_CAGCTGGGTCTCTCTG	Background
CID44041_CGCTGGAGTATCACCA	Background
CID44041_GAAATGAGTGCATCTA	Background
CID44041_GCCTCTATCGCCTGTT	Background
CID44041_GCGAGAAAGGATATAC	Background
CID44041_GGGTCTGCATCACCCT	Background
CID44041_AACTCCCTCTGCCCTA	Background
CID44041_AAGACCTTCCGTCATC	Background
CID44041_AAGGCAGCAGTGACAG	Background
CID44041_ACGATACTCATCTGCC	Background
CID44041_ACGGCCACATAGAAAC	Background
CID44041_ATAACGCTCTGTCTCG	Background
CID44041_ATCTGCCAGTGCGTGA	Background
CID44041_ATGGGAGAGAGGACGG	Background
CID44041_ATTGGTGCACATTTCT	Background
CID44041_CAGCCGATCTCCAGGG	Background
CID44041_CAGCTAATCTGTACGA	Background
CID44041_CAGCTGGCACCGGAAA	Background
CID44041_CATCAGACATGTCTCC	Background
CID44041_CATGACACATTTCACT	Background
CID44041_CATTCGCAGGAGTAGA	Background
CID44041_CCAATCCTCCAGGGCT	Background
CID44041_CCAGCGATCCCTTGTG	Background
CID44041_CCATTCGCAGATCGGA	Background
CID44041_CCCATACCACGAGGTA	Background
CID44041_CCGTACTAGCGATCCC	Background
CID44041_CCTACCACACTCTGTC	Background
CID44041_CGAGCCACACTTGGAT	Background
CID44041_CGCTGGACACAGAGGT	Background
CID44041_CGGACTGCAATGAAAC	Background
CID44041_CTAATGGAGGTGCTTT	Background
CID44041_CTCTACGGTCGCCATG	Background
CID44041_CTCTGGTTCCAAAGTC	Background
CID44041_CTTCTCTAGGTGATTA	Background
CID44041_GATTCAGAGACACTAA	Background
CID44041_GCAGCCATCTTCATGT	Background
CID44041_GCGCCAAGTAAGTGTA	Background
CID44041_GCGCCAAGTTGTCGCG	Background
CID44041_GCGCGATCAGGATTGG	Background
CID44041_GCTGGGTTCCGCGTTT	Background
CID44041_GCTTCCATCATAGCAC	Background
CID44041_GGACGTCGTCGCGGTT	Background
CID44041_GGCGACTGTGCGGTAA	Background
CID44041_GGCGTGTTCGCGGATC	Background
CID44041_GTAACTGTCCTAGGGC	Background
CID44041_GTCAAGTAGCTGTCTA	Background
CID44041_GTCGGGTTCACAGGCC	Background
CID44041_GTCTTCGGTCTGGTCG	Background
CID44041_TAGGCATGTCTTCTCG	Background
CID44041_TCACGAATCACATGCA	Background
CID44041_TCTGAGATCCACGACG	Background
CID44041_TCTGGAATCAACACTG	Background
CID44041_TGAGGGACAGTGACAG	Background
CID44041_TGCCAAAAGTATTGGA	Background
CID44041_TGCTGCTTCACTTATC	Background
CID44041_TTGAACGGTATATGGA	Background
CID44041_TTGCGTCTCCTCCTAG	Background
CID44041_AGCGTATCACGAGAGT	Background
CID44041_ATGAGGGTCCGCGTTT	Background
CID44041_CATGCCTAGCCGCCTA	Background
CID44041_CGCTATCGTGGTAACG	Background
CID44041_CTAGCCTTCGTTACAG	Background
CID44041_CTGATAGCACCCAGTG	Background
CID44041_TCAGCTCAGGGTCTCC	Background
CID44041_TCCCGATGTCAGAATA	Background
CID44041_TGGACGCTCCAAGCCG	Background
CID44041_TGGGCGTCAATGGATA	Background
CID44041_ACTTTCAAGGCATGTG	Background
CID44041_CACACCTGTCAACATC	Background
CID44041_CACACTCTCGCCCTTA	Background
CID44041_GACGTGCCAAGACGTG	Background
CID44041_GGGCATCAGTTAGCGG	Background
CID44041_GCAGCCAGTAGTACCT	Background
CID44041_CGTAGCGGTGTGCCTG	Background
CID44041_CTACACCCAGCTCGAC	Background
CID44041_CTTAGGATCCTTGGTC	Background
CID44041_CTCGAGGGTTTGTGTG	Background
CID44041_GCCTCTAAGTCCTCCT	Background
CID44041_GGTGTTAGTACCGTAT	Background
CID44041_ATCCGAAGTTACGTCA	Background
CID44041_CAGGTGCGTGCAACGA	Background
CID44041_CATCAGAGTGGTCCGT	Background
CID44041_GTATTCTGTAGCACGA	Background
CID44041_GTTAAGCAGAGGGCTT	Background
CID44041_TGGGAAGGTGTGGCTC	Background
CID44041_TTCTTAGTCACGATGT	Background
CID44041_GGAATAACAAGACGTG	Background
CID44041_TCAGCAAGTACCCAAT	Background
CID44041_CTTAGGAGTCGAACAG	Background
CID44041_TGTGTTTCAATCTGCA	Background
CID44041_AACCATGGTGCACGAA	Background
CID44041_CGAGCCAGTCTTCTCG	Background
CID44041_CGATGTACATGGGACA	Background
CID44041_CTGATCCTCTTAGCCC	Background
CID44041_GGGCATCAGACAAGCC	Background
CID44041_TATCAGGGTGCAGTAG	Background
CID44041_TCAACGACATCAGTAC	Background
CID44041_TCTGAGAGTTCCAACA	Background
CID44041_TGGCGCACACCATGTA	Background
CID44041_GGATGTTGTTCTGGTA	Background
CID44041_TCGGTAAAGCTGATAA	Background
CID44041_AACTTTCGTCAGCTAT	Background
CID44041_ACACTGACACCAGCAC	Background
CID44041_CGTCAGGCACATTCGA	Background
CID44041_AACGTTGCATCATCCC	Background
CID44041_CTAGCCTCACGCTTTC	Background
CID44041_TTAGGACCACCAACCG	Background
CID44041_AACACGTGTAAGAGGA	Background
CID44041_AACGTTGGTAGAGTGC	Background
CID44041_ACACCGGGTTTAGCTG	Background
CID44041_ACGATACAGTGATCGG	Background
CID44041_ACTGCTCCAGGTCGTC	Background
CID44041_ACTTGTTTCGTAGATC	Background
CID44041_AGGCCGTGTCATGCCG	Background
CID44041_AGTGGGAGTCACTTCC	High-Risk
CID44041_ATCACGAGTTACCGAT	Background
CID44041_ATTATCCAGATCTGAA	Background
CID44041_CCACGGACAATGCCAT	Background
CID44041_CCCAATCTCATGTCTT	Background
CID44041_CCGTGGAAGGCGACAT	Background
CID44041_CCTACACTCAACACTG	Background
CID44041_CCTTACGAGGGTGTTG	Background
CID44041_CGAGAAGTCTCGTTTA	Background
CID44041_CGATCGGAGTACGCCC	Background
CID44041_CGCGGTACATTTGCCC	Background
CID44041_CTAATGGTCCAGTAGT	Background
CID44041_CTAGAGTCACTGCCAG	Background
CID44041_CTCATTACAGGGAGAG	Background
CID44041_CTCTGGTGTCTCCATC	Background
CID44041_GAAATGAGTTGCGTTA	Background
CID44041_GACGTGCAGTGTACTC	High-Risk
CID44041_GATGAGGGTAGCAAAT	Background
CID44041_GATTCAGCAGCATGAG	Background
CID44041_GCAAACTAGGCGATAC	Background
CID44041_GCACTCTAGTCAATAG	Background
CID44041_GCATGATTCGTCCGTT	Background
CID44041_GGAAAGCAGGAGCGTT	Background
CID44041_GGCTCGAAGAAACGCC	Background
CID44041_GTAACGTGTTTAAGCC	Background
CID44041_GTAGGCCAGCGCCTCA	Background
CID44041_GTAGGCCGTAAGTGGC	Background
CID44041_GTATCTTGTCTCGTTC	Background
CID44041_GTCGTAACAACCGCCA	Background
CID44041_TACTTGTTCTGGCGAC	Background
CID44041_TCAATCTGTGAGTGAC	Background
CID44041_TCAGATGAGTAGCGGT	Background
CID44041_TCAGCAACAGGAACGT	Background
CID44041_TCATTTGTCAACTCTT	Background
CID44041_TCTGGAACAAACTGTC	Background
CID44041_TCTGGAACATGTTGAC	Background
CID44041_TGAAAGAAGAATGTTG	Background
CID44041_TGCTACCTCTCCGGTT	Background
CID44041_TGGCTGGTCGAGAACG	High-Risk
CID44041_TGTCCCAAGGAATCGC	Background
CID44041_TTAGGCATCGCGTTTC	Background
CID44041_TTGCGTCGTCTCCATC	Background
CID44041_AATCCAGCACTGTCGG	Background
CID44041_ACATACGGTCTCCACT	Background
CID44041_ACTTACTTCTTAGAGC	High-Risk
CID44041_CACACCTAGGCTCAGA	Background
CID44041_CTACGTCGTCTTGCGG	Background
CID44041_CGGTTAACAATGTTGC	Background
CID44041_GTCTCGTCAGCCAGAA	Background
CID44041_TCCCGATAGTACTTGC	Background
CID44041_ACGAGCCTCTCTTATG	Background
CID44041_CGGTTAAGTCTTTCAT	Background
CID44041_GCGCGATGTATGGTTC	Background
CID44041_TCAGGTAAGCTTATCG	Background
CID44041_CGTTAGAGTTCGAATC	Background
CID44041_AACTCTTAGCATGGCA	Background
CID44041_CGGACTGAGATCGGGT	Background
CID44041_GAGTCCGGTCTTGTCC	Background
CID44041_TCGGGACTCCAAAGTC	Background
CID44041_TTTACTGAGAATGTTG	Background
CID44041_CCCTCCTGTCTAGCGC	Background
CID44041_GACCTGGGTAGAGTGC	Background
CID44041_AAGGTTCTCACAGGCC	Background
CID44041_CATTCGCTCTTGAGAC	Background
CID44041_CTACACCGTAGGGTAC	Background
CID44041_TACCTATTCCTAGTGA	Background
CID44041_GACACGCAGTCCATAC	Background
CID44041_ATCCGAAGTCGCTTTC	Background
CID44041_GACAGAGCAAGACACG	Background
CID44041_AACTCCCTCCGTCAAA	Background
CID44041_AAGGAGCGTCAGAGGT	Background
CID44041_AAGGAGCTCTAAGCCA	Background
CID44041_AAGGTTCAGGGTTTCT	Background
CID44041_AATCGGTAGCCGTCGT	Background
CID44041_ACATACGAGACTTGAA	Background
CID44041_ACCCACTCACGAAGCA	Background
CID44041_ACTTACTCATAGACTC	Background
CID44041_ACTTTCATCCATGCTC	Background
CID44041_AGGTCATCATGGAATA	Background
CID44041_AGGTCCGTCGGAGGTA	Background
CID44041_ATAAGAGCAACACGCC	Background
CID44041_CAGCAGCAGCGCTTAT	Background
CID44041_CAGCCGAAGTGCCATT	Background
CID44041_CAGCCGAGTATGCTTG	Background
CID44041_CATATTCCATCACAAC	Background
CID44041_CCAATCCAGCCGCCTA	Background
CID44041_CCACGGATCTGTTGAG	Background
CID44041_CCCTCCTTCTTACCGC	Background
CID44041_CCGGTAGGTAGCTGCC	Background
CID44041_CCTACACCACGGCCAT	Background
CID44041_CCTCTGAGTCTCTTTA	Background
CID44041_CCTTCGAGTATAGGTA	Background
CID44041_CGAACATCAAGCCATT	Background
CID44041_CGAACATGTTATTCTC	Background
CID44041_CGACCTTTCAGCGACC	Background
CID44041_CGAGAAGAGCTAGTCT	Background
CID44041_CGATGGCTCCCTTGCA	Background
CID44041_CGATGTAGTACCGGCT	Background
CID44041_CGCGTTTTCCTCGCAT	Background
CID44041_CGCTGGAGTCGGCTCA	Background
CID44041_CGGAGTCAGCCCAGCT	Background
CID44041_CGTAGCGAGGACAGAA	Background
CID44041_CGTAGGCAGAAGGTGA	Background
CID44041_CGTCTACCATATGGTC	Background
CID44041_CTAACTTAGTGTACCT	Background
CID44041_CTAATGGAGATCCTGT	Background
CID44041_CTCGGAGCAGATCTGT	Background
CID44041_CTCGGAGCATAAGACA	Background
CID44041_CTCTAATAGTACTTGC	Background
CID44041_CTGATCCAGAATCTCC	Background
CID44041_CTGGTCTGTATAGGGC	Background
CID44041_CTGTGCTCAGATTGCT	Background
CID44041_CTTAGGAAGTGAACGC	Background
CID44041_GAACATCGTCGCATAT	Background
CID44041_GAAGCAGCATCCGTGG	Background
CID44041_GACGCGTAGATGGCGT	Background
CID44041_GAGTCCGCATGCATGT	Background
CID44041_GATGCTATCATAACCG	Background
CID44041_GCAAACTAGTGCCATT	Background
CID44041_GCAGCCAGTCGCTTCT	Background
CID44041_GCATGTAGTATTAGCC	Background
CID44041_GCCAAATAGCCGCCTA	Background
CID44041_GCGCAGTAGAAGGACA	Background
CID44041_GCTGCAGTCATCTGCC	Background
CID44041_GCTGCAGTCTGCGTAA	Background
CID44041_GCTGCTTTCCCGACTT	Background
CID44041_GGACGTCCATTCACTT	Background
CID44041_GGTGTTAGTAGGAGTC	Background
CID44041_GTAACTGAGCACGCCT	Background
CID44041_GTACGTACATGCCTTC	Background
CID44041_GTGTGCGAGTGTGGCA	Background
CID44041_TAAACCGCAAGTTGTC	Background
CID44041_TAAGCGTTCCGAGCCA	Background
CID44041_TACAGTGCATCCTTGC	Background
CID44041_TACCTTAGTCTGATTG	Background
CID44041_TAGCCGGTCTGAGTGT	Background
CID44041_TCAGCTCGTTGTTTGG	Background
CID44041_TCTGAGAAGGCAGTCA	Background
CID44041_TGAGCATTCATGTGGT	Background
CID44041_TGCCAAAGTCATCCCT	Background
CID44041_TGCCCTAGTCGAAAGC	Background
CID44041_TGCGTGGCAAACAACA	Background
CID44041_TGGGCGTGTAAGTTCC	Background
CID44041_TGGTTCCAGAAGGGTA	Background
CID44041_TTAACTCTCGCCCTTA	Background
CID44041_TTAGGCATCACTATTC	Background
CID44041_TTGCGTCAGGCAGGTT	Background
CID44041_TGAAAGATCGTTACGA	Background
CID44041_AAAGATGGTCTCACCT	Background
CID44041_AAAGTAGTCGGCGGTT	High-Risk
CID44041_AACACGTAGGAACTGC	Background
CID44041_AACTTTCCAGGGTTAG	Background
CID44041_ACCCACTAGACGCTTT	Background
CID44041_ACCGTAATCCTTAATC	Background
CID44041_ACTGAACGTCTCGTTC	Background
CID44041_AGCAGCCTCTGATACG	High-Risk
CID44041_AGCATACTCACCCGAG	Background
CID44041_AGTCTTTAGATGCCTT	Background
CID44041_ATAGACCCAATACGCT	Background
CID44041_ATCTGCCCACAGGTTT	High-Risk
CID44041_ATGAGGGGTTCTCATT	Background
CID44041_ATGGGAGTCCGTTGTC	Background
CID44041_ATTGGTGCAGGGTTAG	Background
CID44041_CACATAGGTCTCCATC	Background
CID44041_CACCACTGTCCGAGTC	Background
CID44041_CAGCAGCGTTGCTCCT	Background
CID44041_CAGCTAAGTAAGAGAG	Background
CID44041_CATCAAGGTAGAAGGA	Background
CID44041_CATCAGACAAACTGTC	Background
CID44041_CCAGCGAAGCCAGGAT	Background
CID44041_CCAGCGACACAGGTTT	Background
CID44041_CCCAATCAGCGATCCC	Background
CID44041_CCTACACGTGAGGCTA	Background
CID44041_CCTCTGAAGCGTGAAC	Background
CID44041_CCTTCCCGTGTTCTTT	Background
CID44041_CGAGCACAGGACATTA	Background
CID44041_CGGACACGTCTCACCT	Background
CID44041_CTACACCAGAGAACAG	Background
CID44041_CTCGAAAGTTACTGAC	Background
CID44041_CTCGAAATCACAATGC	Background
CID44041_CTCGGGACATACCATG	Background
CID44041_CTGATAGCACACATGT	Background
CID44041_GAAGCAGTCTGGAGCC	Background
CID44041_GACAGAGTCCTAGGGC	Background
CID44041_GACGGCTCATCAGTCA	Background
CID44041_GCATACAAGCGTTTAC	Background
CID44041_GCATACAAGCTGCGAA	Background
CID44041_GCGCAGTGTTGTACAC	Background
CID44041_GGACATTTCCGAACGC	Background
CID44041_GGCTCGACACTTCGAA	Background
CID44041_GGTGTTAAGGACATTA	High-Risk
CID44041_GTCGGGTTCGTCGTTC	Background
CID44041_GTCTTCGCATTTCACT	Background
CID44041_GTGCGGTTCGCATGAT	Background
CID44041_GTGGGTCGTAGGGTAC	Background
CID44041_GTTCATTAGATGGGTC	Background
CID44041_TACCTATTCGAGAGCA	Background
CID44041_TATCAGGGTATCGCAT	Background
CID44041_TATGCCCTCGCTGATA	Background
CID44041_TCTCTAATCCAAAGTC	Background
CID44041_TGACGGCTCTGCCAGG	High-Risk
CID44041_TGACTAGGTTGGGACA	Background
CID44041_TGCCAAAGTGTTTGGT	Background
CID44041_TGCGTGGGTTTGTTTC	Background
CID44041_TGCTACCCATTATCTC	Background
CID44041_TTAACTCGTACTTAGC	Background
CID44041_TTAGGACGTCCGAAGA	Background
CID44041_TTGAACGAGATTACCC	Background
CID44041_CCTTACGGTTACGCGC	Background
CID44041_GCGAGAATCAGTCCCT	Background
CID44041_GGTGCGTTCGTCGTTC	Background
CID44041_TTCGAAGAGACAATAC	Background
CID44041_AAAGATGCATCAGTAC	Background
CID44041_AAGGAGCCACCAGTTA	Background
CID44041_ACACCAAAGGTACTCT	Background
CID44041_ACACCAACAAGTCATC	Background
CID44041_ACCAGTAAGTTAGGTA	Background
CID44041_ACGCCAGCATATGAGA	Background
CID44041_ACGCCGACATGCCACG	Background
CID44041_ACTTGTTCAAACTGCT	High-Risk
CID44041_AGAATAGTCTGCAGTA	Background
CID44041_AGGCCACCACCTCGTT	Background
CID44041_AGGGTGAGTGCACCAC	Background
CID44041_ATCACGAGTACTTAGC	Background
CID44041_ATGTGTGGTAATCACC	Background
CID44041_CAACCTCGTGTCGCTG	Background
CID44041_CAACTAGCAAGACACG	Background
CID44041_CAAGGCCCAGAGTGTG	Background
CID44041_CACAAACCAGATGGGT	High-Risk
CID44041_CATGGCGCAGCATACT	Background
CID44041_CCCAATCCATGAACCT	Background
CID44041_CGATGTATCGTGGGAA	Background
CID44041_CGTTCTGCAGCCAGAA	Background
CID44041_CTACGTCTCAGGCAAG	Background
CID44041_CTCTACGTCACCCTCA	Background
CID44041_GGGACCTAGCATCATC	Background
CID44041_GGTGCGTTCCTAGTGA	Background
CID44041_GTAACGTCATCTACGA	Background
CID44041_TAGACCATCCAAATGC	Background
CID44041_TATCTCATCAGTGTTG	Background
CID44041_TCAACGAGTAGCGCTC	Background
CID44041_TCAACGATCGCAGGCT	Background
CID44041_TCGGTAAGTCTGGTCG	Background
CID44041_TCTCATAAGCACAGGT	Background
CID44041_TGACTTTAGCCAGGAT	Background
CID44041_TGCGGGTTCCAACCAA	Background
CID44041_CTCACACGTTAGAACA	Background
CID44041_CTGGTCTAGCCAGAAC	Background
CID44041_TTAGTTCCAAGTCATC	High-Risk
CID44041_TTTACTGCACAAGCCC	Background
CID44041_CCAGCGAAGAGAGCTC	Background
CID44041_GAACATCGTAAGGATT	Background
CID44041_GAGGTGAAGCAGCGTA	Background
CID44041_GCTGCAGTCCAGAAGG	Background
CID44041_TACCTATGTTGGTAAA	Background
CID44041_AGCGGTCCAGACGCCT	Background
CID44041_CTTAACTAGTGTCTCA	Background
CID44041_GCGACCATCAACACGT	Background
CID44041_GGAACTTTCGAGGTAG	Background
CID44041_TGACTAGGTGCTAGCC	Background
CID44041_TGGCCAGTCGGATGGA	Background
CID44041_CGGACGTAGTCAAGCG	Background
CID44041_TGCCCATGTAGAGCTG	Background
CID44041_ATAGACCCATGGATGG	Background
CID44041_ACGGGTCGTTGGTTTG	Background
CID44041_AGTTGGTGTGGGTATG	Background
CID44041_ATCATGGTCGGAATCT	Background
CID44041_CATTCGCAGCCAGAAC	Background
CID44041_CTAGTGATCTCTAGGA	Background
CID44041_TCAACGATCAACTCTT	Background
CID44041_TCAGCAAAGACACTAA	Background
CID44041_TGACGGCCACCACCAG	Background
CID44041_GACGTGCCATCACGAT	Background
CID44041_TCTCTAACACGTCAGC	Background
CID44041_CAGATCACACAAGACG	Background
CID44041_GCGACCATCGCTAGCG	Background
CID44041_AAAGATGTCCCAAGAT	Background
CID44041_AACTCCCCAATCAGAA	Background
CID44041_AATCGGTCATGCCTAA	Background
CID44041_ACATACGAGGGTTTCT	Background
CID44041_ACGATGTTCGTCTGAA	Background
CID44041_ACGCCAGAGAGTTGGC	Background
CID44041_ACGGAGACAAGGTGTG	Background
CID44041_AGAGCGAAGATGGCGT	Background
CID44041_AGATCTGTCATCATTC	Background
CID44041_AGCTTGAAGGCTAGGT	Background
CID44041_AGGGATGCAGTACACT	Background
CID44041_AGGGATGGTAGCTCCG	Background
CID44041_AGGGATGGTCCGTCAG	Background
CID44041_AGGGTGAAGGGTGTGT	Background
CID44041_AGTCTTTGTAGTAGTA	High-Risk
CID44041_AGTCTTTTCTTATCTG	Background
CID44041_AGTGAGGAGCGATGAC	Background
CID44041_AGTGTCATCAGCAACT	Background
CID44041_AGTTGGTTCGTTACGA	Background
CID44041_ATCATCTCAGACGTAG	Background
CID44041_ATCATCTGTGTTGAGG	Background
CID44041_ATCGAGTAGATGGCGT	Background
CID44041_ATGGGAGCACGAAATA	Background
CID44041_ATGTGTGGTTCACCTC	Background
CID44041_ATTACTCAGTTGTCGT	Background
CID44041_ATTGGACGTTATCGGT	Background
CID44041_ATTGGACTCGACAGCC	Background
CID44041_ATTGGTGAGAGACTAT	Background
CID44041_CAACCAACAGTAAGAT	Background
CID44041_CAACCAAGTACAGCAG	Background
CID44041_CACACCTAGAGAACAG	Background
CID44041_CACAGTAAGTAGGTGC	Background
CID44041_CACCACTAGATCGATA	Background
CID44041_CACCAGGTCTGGGCCA	Background
CID44041_CACTCCAAGTATTGGA	Background
CID44041_CATATGGCAGATCTGT	High-Risk
CID44041_CCACGGAAGATGCCTT	Background
CID44041_CCGGGATAGAAGGACA	Background
CID44041_CCGGTAGGTTAAGTAG	Background
CID44041_CCTACCAAGTGGACGT	Background
CID44041_CCTTTCTAGCTGCAAG	Background
CID44041_CGACTTCCATTTCACT	Background
CID44041_CGCCAAGCACCACGTG	Background
CID44041_CGCTGGAGTGAGGGAG	Background
CID44041_CGCTGGATCGGAAACG	Background
CID44041_CGGAGCTCACGGTAGA	Background
CID44041_CGGAGTCCACCAACCG	Background
CID44041_CGGAGTCCAGCCTATA	Background
CID44041_CGTCTACCAGGACGTA	Background
CID44041_CGTGAGCAGGTGTGGT	Background
CID44041_CGTTCTGTCTTACCTA	Background
CID44041_CTAAGACCATGCCCGA	Background
CID44041_CTACACCCAAGCTGGA	Background
CID44041_CTGAAACGTGGTGTAG	Background
CID44041_CTTAGGAGTCTTGCGG	Background
CID44041_CTTGGCTTCAGAGGTG	Background
CID44041_CTTTGCGAGTGTACTC	Background
CID44041_GAACGGAGTCCGTCAG	Background
CID44041_GAATAAGGTCTACCTC	Background
CID44041_GACAGAGGTCGTTGTA	Background
CID44041_GACTAACGTAAGAGAG	Background
CID44041_GACTAACGTGGCAAAC	Background
CID44041_GACTAACTCCGATATG	Background
CID44041_GACTACAAGCTTTGGT	Background
CID44041_GAGGTGAGTATAGTAG	Background
CID44041_GAGTCCGAGTGTACGG	Background
CID44041_GATCGCGTCACATGCA	Background
CID44041_GCATGTAAGCATCATC	Background
CID44041_GCCAAATAGCGCTCCA	Background
CID44041_GCGACCAGTGTTGGGA	Background
CID44041_GCGCAGTCAGTCTTCC	Background
CID44041_GCGCGATCATCTATGG	Background
CID44041_GCGGGTTTCCAGAAGG	Background
CID44041_GCTGCAGTCGGCGCAT	Background
CID44041_GCTGCGATCGGCGCTA	Background
CID44041_GCTTGAAAGATGTTAG	Background
CID44041_GGAGCAAAGCACAGGT	Background
CID44041_GGATGTTTCCGTCATC	Background
CID44041_GGCGACTTCGCCTGAG	Background
CID44041_GGCTGGTAGATCCCAT	Background
CID44041_GGGCACTCATCGGACC	Background
CID44041_GTATCTTCAAGCCCAC	Background
CID44041_GTCTTCGTCACCCTCA	Background
CID44041_GTGCATAAGCTAAGAT	Background
CID44041_GTTAAGCTCGCCGTGA	Background
CID44041_TACAGTGGTACCGGCT	Background
CID44041_TACTCGCGTTCAGACT	Background
CID44041_TATCAGGAGCTGAAAT	Background
CID44041_TATCAGGCATCTCGCT	Background
CID44041_TATGCCCAGAGCTGCA	Background
CID44041_TCAGCAAGTCGCGAAA	Background
CID44041_TCGTACCCATCGATTG	Background
CID44041_TCTTCGGGTGAACCTT	Background
CID44041_TGAGCCGTCGGCCGAT	Background
CID44041_TGCCCATCATCTCGCT	Background
CID44041_TGCGTGGTCCGTACAA	Background
CID44041_TGGCCAGTCACCGTAA	Background
CID44041_TGGGCGTAGCGTGTCC	Background
CID44041_TGTTCCGAGGGAGTAA	Background
CID44041_TTAGGCAAGACTTGAA	Background
CID44041_TTGAACGCACCCATGG	Background
CID44041_TTGTAGGGTCCAAGTT	Background
CID44041_CGGCTAGGTTAAGTAG	Background
CID44041_GTACTTTGTCTTTCAT	Background
CID44041_CAGCGACTCAGGCGAA	Background
CID44041_CCCAATCGTCTCATCC	Background
CID44041_CTGGTCTTCCGTTGCT	Background
CID44041_GCATGATGTGTTGAGG	Background
CID44041_GCGAGAAGTCCCTACT	Background
CID44041_GGAAAGCTCTGCGACG	Background
CID44041_ACATCAGTCACAGTAC	Background
CID44041_TTCTCCTCATTGGTAC	Background
CID44041_AGATTGCCAAAGTGCG	Background
CID44041_GTAACGTAGGGATACC	Background
CID44041_AACTCAGAGAAACGAG	Background
CID44041_AGATTGCGTACCGTTA	Background
CID44041_AGTAGTCCATGCCTAA	Background
CID44041_ATCATCTTCAAACCGT	Background
CID44041_ATCATGGGTTCCTCCA	Background
CID44041_CAGCAGCAGGACCACA	Background
CID44041_CCTACCAAGAGGTTAT	Background
CID44041_CGTTAGATCAGCTGGC	Background
CID44041_CGTTAGATCTATCGCC	Background
CID44041_GGTGTTATCCACGACG	Background
CID44041_GTATCTTTCGCAAGCC	Background
CID44041_TACTCATGTATATGAG	Background
CID44041_TATGCCCCACGGTGTC	Background
CID44041_TGCCCTATCTGATACG	Background
CID44041_TTTATGCGTTCTCATT	High-Risk
CID44041_CAAGAAAAGTAAGTAC	Background
CID44041_CGTCAGGGTCGCTTTC	Background
CID44041_GACACGCGTAAGTAGT	Background
CID44041_GACGCGTAGGTGATTA	Background
CID44041_GCACATAGTAAGAGAG	Background
CID44041_TACGGTAAGACAGACC	Background
CID44041_TAGTGGTGTTCCACAA	Background
CID44041_ACCCACTAGAGTCGGT	Background
CID44041_CTTCTCTCATGTTGAC	Background
CID44041_GACCTGGGTCAAAGCG	Background
CID44041_GTGGGTCTCACTGGGC	Background
CID44041_TAAGAGACATGAACCT	Background
CID44041_TCGTACCTCTTGCATT	Background
CID44041_TGGTTCCGTCTCATCC	Background
CID44041_CACCAGGTCACTTACT	Background
CID44041_CTGCTGTCATTTCACT	Background
CID44041_AACCGCGAGCGATAGC	Background
CID44041_TCGCGTTGTCCCGACA	Background
CID44041_AGTTGGTTCGTGTAGT	Background
CID44041_ACACCGGGTCTGCAAT	Background
CID44041_ACGCCGACACACTGCG	Background
CID44041_CAGAGAGAGAAGCCCA	Background
CID44041_CATGACAAGGGAACGG	Background
CID44041_GGATGTTGTTCGCGAC	High-Risk
CID44041_GGCTGGTCAGGGTACA	Background
CID44041_TACACGAAGCTGATAA	Background
CID44041_CACAGGCAGATGCCAG	Background
CID44041_AAACGGGAGGTACTCT	Background
CID44041_AACCGCGGTGCACGAA	Background
CID44041_AACTCTTCACAGAGGT	Background
CID44041_AACTGGTAGTGTACTC	Background
CID44041_AAGACCTTCGGTCTAA	Background
CID44041_AAGCCGCTCCTAGAAC	Background
CID44041_ACAGCCGCAGATCCAT	Background
CID44041_ACATGGTTCTGCAGTA	Background
CID44041_ACGTCAAAGGCAATTA	Background
CID44041_ACTGAACGTACCCAAT	Background
CID44041_ACTTGTTGTGACGCCT	Background
CID44041_AGGGATGCAACCGCCA	Background
CID44041_ATAAGAGAGTTCGATC	Background
CID44041_ATCATCTCAATCACAC	Background
CID44041_ATCTACTAGGATATAC	Background
CID44041_ATGAGGGTCTTAGCCC	Background
CID44041_CACAGGCAGACTAAGT	Background
CID44041_CAGCATAAGGTGTGGT	Background
CID44041_CAGCATAGTTGATTGC	Background
CID44041_CATCAGAGTCAGATAA	Background
CID44041_CATTATCGTAAGCACG	Background
CID44041_CCCAGTTAGGTGCTTT	Background
CID44041_CCTCTGATCCAAGTAC	Background
CID44041_CGGACTGAGTATCTCG	Background
CID44041_CGTAGGCGTCAAGCGA	Background
CID44041_CTAACTTTCAGTGTTG	Background
CID44041_CTCGGGAGTCCGACGT	Background
CID44041_CTGTGCTGTCAGGACA	Background
CID44041_GATCGATCAAGACGTG	Background
CID44041_GCCTCTAGTTGTTTGG	Background
CID44041_GCTCTGTTCTAACCGA	Background
CID44041_GCTGCAGAGAAACGAG	Background
CID44041_GGAAAGCAGCCGGTAA	Background
CID44041_GGACATTCATGAGCGA	Background
CID44041_GGACATTTCGCGCCAA	Background
CID44041_GGAGCAACAACGATCT	Background
CID44041_GGGCACTCATATACGC	Background
CID44041_GGGTTGCGTATCAGTC	Background
CID44041_GTAACGTGTTGTGGAG	Background
CID44041_GTGCGGTCATGGTAGG	Background
CID44041_GTGCGGTGTTCCACAA	Background
CID44041_TATGCCCGTGCACCAC	Background
CID44041_TCAGCAAGTAAACACA	Background
CID44041_TCGGGACTCTGTTTGT	Background
CID44041_TGAGAGGAGTGAAGAG	Background
CID44041_TTGGAACAGGCGATAC	Background
CID44041_CTAGCCTAGACAGGCT	Background
CID44041_GCTTGAAAGCGCTCCA	Background
CID44041_TTGAACGCAATGAAAC	Background
CID44041_ACACCCTCACATAACC	Background
CID44041_ACATGGTGTCGCATCG	Background
CID44041_CAAGATCAGCGTGTCC	Background
CID44041_CGTGTCTGTCTTCAAG	Background
CID44041_CTTCTCTGTGTTTGGT	Background
CID44041_GAGGTGAAGTTCGATC	Background
CID44041_GATGAGGGTGTTGGGA	Background
CID44041_GCTTCCACAGTTAACC	Background
CID44041_GTGCATACAAAGAATC	Background
CID44041_TCACGAAGTCGGCACT	Background
CID44041_TGGGCGTTCGTCTGCT	Background
CID44041_TGACGGCTCTTTCCTC	Background
CID44041_GGTGCGTGTATCGCAT	Background
CID44041_AGGGATGTCACGCATA	Background
CID44041_AGTAGTCAGGCTCATT	Background
CID44041_ATAACGCTCATCGCTC	Background
CID44041_CAACCAAAGAGTCGGT	Background
CID44041_CACAAACCACGTCTCT	Background
CID44041_CGTGTAAGTATAAACG	Background
CID44041_CTCGGGAGTTAAAGTG	Background
CID44041_CTGATCCTCCACGTGG	Background
CID44041_GACGGCTCAAGAAGAG	Background
CID44041_GCGCGATTCCGCGGTA	Background
CID44041_GGTATTGGTCCGAGTC	Background
CID44041_GTAACTGCAAACGCGA	Background
CID44041_GTACTCCAGGCGACAT	Background
CID44041_TACACGATCGGCGCAT	Background
CID44041_TACCTTAAGGCGTACA	Background
CID44041_TCACGAAAGGCCCGTT	Background
CID44041_TCTGAGATCGTCTGCT	Background
CID44041_TGCACCTTCAGCAACT	Background
CID44041_TGCCCATCATCTCCCA	Background
CID44041_GACTGCGTCAGGCAAG	Background
CID44041_CATCAAGAGTCACGCC	Background
CID44041_CATCAGACAGTAACGG	Background
CID44041_CGAGCCACACAGGAGT	Background
CID44041_GAACGGAGTCCGAGTC	Background
CID44041_AAAGCAAAGGACGAAA	Background
CID44041_AACTTTCTCCTCTAGC	Background
CID44041_AGGGAGTAGCCCAACC	Background
CID44041_CGTGAGCGTCTGATTG	Background
CID44041_GGCTGGTTCCGCGCAA	Background
CID44041_CGTAGCGAGACCTAGG	Background
CID44041_CTGTTTATCTTTACGT	Background
CID44041_GCTTGAAGTCATGCCG	Background
CID44041_TCGGGACAGACAGAGA	Background
CID44041_TCTCATAGTCATGCCG	Background
CID44041_TGCCCTATCAGTTAGC	Background
CID44041_CGCTATCTCACAGGCC	Background
CID44041_AGCAGCCAGCTCCTTC	Background
CID44041_AGGCCACGTCCAGTTA	Background
CID44041_AGGGTGAGTTTACTCT	Background
CID44041_AGTCTTTCATACCATG	Background
CID44041_ATCTACTGTACTTGAC	Background
CID44041_ATCTGCCCAGCATGAG	Background
CID44041_ATCTGCCTCCAAACAC	Background
CID44041_CAGCTGGTCAATAAGG	Background
CID44041_CCACGGAAGACCTTTG	Background
CID44041_CCTCAGTGTAGCTCCG	Background
CID44041_CCTTCCCTCTACTCAT	Background
CID44041_CGAGCACGTCCATGAT	Background
CID44041_CGCTATCTCGAACGGA	Background
CID44041_CGGCTAGAGTATCGAA	Background
CID44041_CGTTAGACAATGAAAC	Background
CID44041_CTGCGGAGTTCGTGAT	Background
CID44041_GAACCTACATGCTAGT	Background
CID44041_GATCGATTCTGACCTC	Background
CID44041_GCGAGAAGTCCGCTGA	Background
CID44041_GGCGACTCAACACCCG	Background
CID44041_GGGTTGCAGATGGCGT	Background
CID44041_TACTTGTAGTCGTACT	Background
CID44041_TGCGCAGCAGCTGCTG	Background
CID44041_TTAGGACCAAGCTGTT	Background
CID44041_TTGCCGTTCAGCGACC	Background
CID44041_TTGTAGGGTTGTCTTT	Background
CID44041_TTTGTCACATCCTTGC	Background
CID44041_ACATGGTTCATGCTCC	Background
CID44041_ACGCAGCTCGCCAAAT	Background
CID44041_CACCACTCACCTGGTG	Background
CID44041_CTTAGGATCTAACTTC	Background
CID44041_GCAGTTAAGGTGTTAA	Background
CID44041_GTATTCTGTACACCGC	Background
CID44041_GTTCTCGCAATCGAAA	Background
CID44041_TATCTCAGTCCGAATT	Background
CID44041_CCCATACAGAAGGACA	Background
CID44041_AGGGTGAGTAACGACG	Background
CID44041_CTTGGCTCAATAGCAA	Background
CID44041_GCAAACTAGTGAACAT	Background
CID44041_TCAGGATAGACCACGA	Background
CID44041_TCGGTAATCCACTGGG	Background
CID44041_CCGGTAGGTCAGAAGC	Background
CID44041_GACTGCGTCATGTCTT	Background
CID44041_CACACAATCTGCCCTA	Background
CID44041_GGACAGAAGTCATCCA	Background
CID44041_AATCGGTGTAGTAGTA	Background
CID44041_ACTTACTCACCGGAAA	Background
CID44041_CACTCCATCCGAATGT	Background
CID44041_GTAGGCCTCTCATTCA	Background
CID44041_GTATCTTGTCTAGAGG	Background
CID44041_ATCCGAAAGAAACGAG	Background
CID44041_CAGAATCAGGCGTACA	Background
CID44041_CCCTCCTGTCGACTGC	Background
CID44041_CGTTAGACACTTGGAT	Background
CID44041_CTAGTGACACTCTGTC	Background
CID44041_CTGATAGGTGTAATGA	Background
CID44041_GGGAATGGTAGAAGGA	Background
CID44041_GGGAATGTCTCTTATG	Background
CID44041_GGGATGAGTGCCTTGG	Background
CID44041_TCAGGTACAGCTTCGG	Background
CID44041_TGACAACAGAAGCCCA	Background
CID44041_ACCAGTACAAGCTGGA	Background
CID44041_CCTAAAGTCGGTGTTA	Background
CID44041_CTTCTCTTCTTGCCGT	Background
CID44041_GAATAAGGTTAAAGTG	Background
CID44041_TGACTTTAGCACAGGT	Background
CID44041_TTGCCGTTCGCGATCG	Background
CID44041_GCTGCGAAGCGTGAGT	Background
CID44041_TCACGAATCATTGCCC	Background
CID44041_CACACTCAGATCCCAT	Background
CID44041_CGATTGAAGCGAAGGG	Background
CID44041_GTATTCTCAAAGGTGC	Background
CID44041_TACTTACGTATCAGTC	Background
CID44041_TCAGGATTCACATAGC	Background
CID44041_TCATTTGTCAAACAAG	Background
CID44041_TGATTTCAGAGACTTA	Background
CID44041_AGGGTGATCACGCATA	Background
CID44041_CCTATTACATGGTAGG	Background
CID44041_GAAATGAAGCGATAGC	Background
CID44041_TTTATGCAGGCCATAG	Background
CID44041_ATCCACCCACAGATTC	Background
CID44041_CAGCGACAGCCACGTC	Background
CID44041_TCTTCGGCAGCGTAAG	Background
CID44041_CATATGGCACGAAAGC	Background
CID44041_CCACGGACAGCTTAAC	Background
CID44041_CTAGTGAAGAGGTAGA	Background
CID44041_GTAGTCAGTATATGAG	Background
CID44041_GTTAAGCGTGTCAATC	Background
CID44041_TACGGTAAGTCATGCT	Background
CID44041_TTTCCTCGTACGACCC	Background
CID44041_CATGACACATTGAGCT	Background
CID44041_TGGTTCCAGACCACGA	Background
CID44041_TTGACTTGTCTCATCC	Background
CID44041_CTGAAACGTGTGCGTC	Background
CID44041_TGCCCTATCGGCTACG	Background
CID44041_ACTTTCACAGAGTGTG	Background
CID44041_AGTGGGATCTCTAAGG	Background
CID44041_GTGGGTCGTAAACACA	Background
CID44041_TTCTCCTGTTTCCACC	Background
CID44041_AAACGGGTCTTTACAC	Background
CID44041_AGAGTGGAGGGAGTAA	Background
CID44041_CATGCCTTCGGAAATA	Background
CID44041_CCGGGATCAGGAATCG	Background
CID44041_CTTAGGAAGAAACCAT	Background
CID44041_GTCAAGTGTGTTGGGA	Background
CID44041_TCTTTCCCAAGTCTGT	Background
CID44041_TGCTACCCACGGATAG	Background
CID44041_TTGGCAAAGATATGCA	Background
CID44041_AAAGATGGTCGCATCG	Background
CID44041_AAATGCCCAATGTTGC	Background
CID44041_AACTCAGCAAGCCGCT	Background
CID44041_AAGGAGCGTGTCGCTG	Background
CID44041_AAGGTTCAGTGAAGAG	Background
CID44041_AAGGTTCTCTCAACTT	Background
CID44041_ACACCGGAGGCCGAAT	Background
CID44041_ACACTGAGTCCGTGAC	Background
CID44041_ACATCAGAGCTAACTC	Background
CID44041_ACGATACGTATCACCA	Background
[truncated: 40,513 more rows]

## Sheet: 2. DEGAS Cell Labels
Cell	Label
CID44041_AAAGTAGTCCTAGGGC	High-Risk
CID44041_AACACGTCAACACCTA	High-Risk
CID44041_AACTTTCTCCTACAGA	High-Risk
CID44041_AAGGCAGTCATTGCGA	High-Risk
CID44041_AAGGTTCGTTGTCGCG	High-Risk
CID44041_AATCGGTAGAGCTGGT	High-Risk
CID44041_ACCAGTACATGCTGGC	Background
CID44041_ACCTTTAAGACGCAAC	Background
CID44041_ACGGAGATCGATGAGG	High-Risk
CID44041_ACTGCTCAGCTGTCTA	High-Risk
CID44041_ACTTGTTCATGGTAGG	High-Risk
CID44041_AGGTCATTCACCCTCA	High-Risk
CID44041_AGTCTTTTCACTATTC	High-Risk
CID44041_AGTGTCACAAGCTGGA	High-Risk
CID44041_ATAAGAGGTAGCCTCG	High-Risk
CID44041_CAAGAAATCCCGGATG	High-Risk
CID44041_CACATAGCATTTGCTT	High-Risk
CID44041_CACTCCAAGTTGAGAT	Background
CID44041_CAGCATATCCGGCACA	High-Risk
CID44041_CAGCGACCATGGTCTA	Background
CID44041_CAGGTGCCATACTCTT	High-Risk
CID44041_CATATGGTCAGGCCCA	High-Risk
CID44041_CATCGGGAGTGGTCCC	High-Risk
CID44041_CCACTACTCCAGATCA	High-Risk
CID44041_CCAGCGAAGTGCGATG	High-Risk
CID44041_CCGGGATCAGATGGCA	Background
CID44041_CCTTACGGTAATCACC	High-Risk
CID44041_CGACCTTGTTCCACAA	High-Risk
CID44041_CGACTTCTCGCTTAGA	High-Risk
CID44041_CGCGTTTGTGCTGTAT	High-Risk
CID44041_CGCTGGAGTCGAGATG	High-Risk
CID44041_CGGGTCATCTTGCCGT	High-Risk
CID44041_CGTCACTTCACCATAG	High-Risk
CID44041_CGTCAGGTCGGTCCGA	High-Risk
CID44041_CGTGAGCTCCTAGTGA	High-Risk
CID44041_CGTGTAAGTCACTTCC	High-Risk
CID44041_CGTTCTGGTCAGAAGC	High-Risk
CID44041_CTACACCAGTACTTGC	Background
CID44041_CTACCCAGTCTCACCT	High-Risk
CID44041_CTAGTGATCACCCGAG	High-Risk
CID44041_GAAACTCAGGAATTAC	High-Risk
CID44041_GAATAAGCAATGGTCT	High-Risk
CID44041_GACCAATAGCCACTAT	High-Risk
CID44041_GATCGATCATGTAGTC	High-Risk
CID44041_GCAAACTTCGGAGCAA	High-Risk
CID44041_GCATGATAGAACAATC	High-Risk
CID44041_GGCCGATCACTCGACG	High-Risk
CID44041_GTAACTGGTAAACCTC	High-Risk
CID44041_GTACGTACAATGTTGC	High-Risk
CID44041_GTCAAGTAGGGTGTTG	High-Risk
CID44041_GTGTTAGAGGAATGGA	Background
CID44041_TAAGAGATCTGTCAAG	High-Risk
CID44041_TACGGGCAGCGAAGGG	High-Risk
CID44041_TAGACCAGTCGAACAG	High-Risk
CID44041_TATGCCCGTCGACTGC	High-Risk
CID44041_TCAGGATGTCTCCATC	Background
CID44041_TCATTTGTCACCTCGT	High-Risk
CID44041_TCGTAGAAGAACTCGG	High-Risk
CID44041_TCGTAGACAGACACTT	High-Risk
CID44041_TCTATTGCACCTGGTG	Background
CID44041_TCTCATAGTCACAAGG	High-Risk
CID44041_TGATTTCTCACCATAG	High-Risk
CID44041_TGCCAAAGTTGTTTGG	Background
CID44041_TGGCTGGTCATCATTC	High-Risk
CID44041_TGGGAAGAGCCCAATT	High-Risk
CID44041_TGGGCGTGTTATGTGC	High-Risk
CID44041_TGTCCCAAGTATCTCG	High-Risk
CID44041_TTAGGCATCGGAAATA	High-Risk
CID44041_TTTACTGCATGACGGA	High-Risk
CID44041_TCGGTAAAGATGGGTC	High-Risk
CID44041_CGGTTAATCTAAGCCA	Background
CID44041_CATCGAACATATACCG	High-Risk
CID44041_CCTCAGTGTCCAGTGC	High-Risk
CID44041_GCTGCGAAGAGTACCG	High-Risk
CID44041_GGATTACAGAGGTTGC	High-Risk
CID44041_ACGGAGACATCTCGCT	High-Risk
CID44041_ATCCGAAGTGCAGACA	High-Risk
CID44041_CATGGCGGTTCTGTTT	Background
CID44041_CTAATGGTCTACCTGC	High-Risk
CID44041_TCCCGATTCAAACAAG	High-Risk
CID44041_GGCTCGAGTTGCCTCT	High-Risk
CID44041_AGTCTTTAGCAAATCA	High-Risk
CID44041_TCATTTGTCCTGTAGA	High-Risk
CID44041_TTGCGTCTCAGCACAT	High-Risk
CID44041_GCATGATCAGTGACAG	High-Risk
CID44041_CAGCTGGAGACAGAGA	Background
CID44041_CGACTTCGTTCTCATT	High-Risk
CID44041_TTCTACAAGCTATGCT	High-Risk
CID44041_AAAGCAAAGTAGGCCA	High-Risk
CID44041_AAGGCAGAGACTTTCG	High-Risk
CID44041_AATCGGTGTTCTGGTA	High-Risk
CID44041_ATCCACCAGTGAAGTT	High-Risk
CID44041_CAACCAAAGTTAAGTG	High-Risk
CID44041_CAGCGACGTTGCCTCT	High-Risk
CID44041_CAGGTGCAGTTGAGTA	Background
CID44041_CCTAAAGCAATAACGA	High-Risk
CID44041_CGTCCATAGCTAGCCC	High-Risk
CID44041_CTAACTTGTGCAACTT	High-Risk
CID44041_CTTACCGGTGTGTGCC	High-Risk
CID44041_GAACATCTCAACGAAA	High-Risk
CID44041_GACGGCTTCGGTGTTA	High-Risk
CID44041_GACTAACTCCACTGGG	High-Risk
CID44041_GAGCAGAGTAGCGATG	High-Risk
CID44041_GATGAAAAGTCAATAG	High-Risk
CID44041_GCAGCCATCTTGAGGT	High-Risk
CID44041_GTAACGTGTGAGGGAG	High-Risk
CID44041_GTCTCGTGTACAAGTA	High-Risk
CID44041_TAAGAGAAGCCGATTT	High-Risk
CID44041_TATCAGGAGCATCATC	High-Risk
CID44041_TTTACTGTCAGGATCT	High-Risk
CID44041_AATCGGTGTGTTTGTG	High-Risk
CID44041_ACGCCAGAGGTGTGGT	High-Risk
CID44041_CACAGGCGTGAAAGAG	High-Risk
CID44041_CCCAATCTCACCAGGC	High-Risk
CID44041_CCCTCCTGTCGGCATC	High-Risk
CID44041_CCTATTAAGAGGTAGA	High-Risk
CID44041_CGTAGCGCAACACGCC	High-Risk
CID44041_CTGATAGAGTGTACGG	High-Risk
CID44041_GTATTCTTCACGCATA	High-Risk
CID44041_TATGCCCGTACTCGCG	High-Risk
CID44041_TTGAACGCACCGATAT	High-Risk
CID44041_ATCTACTGTTCCAACA	High-Risk
CID44041_AACACGTAGTTGAGTA	Background
CID44041_AGGCCACCATATGCTG	High-Risk
CID44041_ATCTGCCGTGCGGTAA	High-Risk
CID44041_GCACTCTTCTCGCTTG	Background
CID44041_AACCGCGCACATCCAA	High-Risk
CID44041_ACTGTCCTCTGTGCAA	High-Risk
CID44041_CAACTAGAGGTGCACA	High-Risk
CID44041_CACATAGAGTACGACG	High-Risk
CID44041_CACCTTGGTCTAAAGA	High-Risk
CID44041_CCTTCGATCACCAGGC	High-Risk
CID44041_CGTCAGGTCCACGACG	High-Risk
CID44041_CTCTAATAGCTAACTC	High-Risk
CID44041_CTGAAGTCAGGACCCT	High-Risk
CID44041_GGAGCAAGTACACCGC	High-Risk
CID44041_GTCGGGTTCCGCGGTA	High-Risk
CID44041_GTTCTCGAGTGACTCT	High-Risk
CID44041_TGCCCTATCTTACCTA	High-Risk
CID44041_TGTATTCGTCAACTGT	High-Risk
CID44041_TGTCCCAAGTTTGCGT	High-Risk
CID44041_TTTATGCAGACGCACA	High-Risk
CID44041_AAAGTAGTCTGATTCT	Background
CID44041_ACATCAGAGAGCCTAG	Background
CID44041_ACCCACTGTCTTCTCG	Background
CID44041_ACGCAGCCACGGATAG	Background
CID44041_ACTGATGGTCGGCACT	Background
CID44041_ACTTGTTTCAACACCA	Background
CID44041_AGAATAGAGCGCTCCA	Background
CID44041_AGACGTTAGTTCCACA	Background
CID44041_AGACGTTGTCCGTGAC	Background
CID44041_AGATTGCGTCTGCAAT	Background
CID44041_AGCCTAAGTAAACACA	Background
CID44041_AGGTCATAGCCATCGC	Background
CID44041_AGTGAGGCAGAGTGTG	Background
CID44041_ATCTACTCACAGGTTT	Background
CID44041_ATGCGATGTTCCGTCT	Background
CID44041_ATGTGTGAGAATGTGT	Background
CID44041_ATTGGACTCCGCGCAA	Background
CID44041_CAACCTCTCAGGCAAG	Background
CID44041_CACACTCAGGTGGGTT	Background
CID44041_CACATAGTCTGTTGAG	Background
CID44041_CACATTTCATCACGTA	Background
CID44041_CAGATCAAGCCAGAAC	Background
CID44041_CAGATCAGTAAGGATT	Background
CID44041_CATCAGAAGGATATAC	Background
CID44041_CATGGCGTCGAATGGG	Background
CID44041_CCGTGGAGTTTGGGCC	Background
CID44041_CCTATTACAAGGACTG	Background
CID44041_CCTTCCCAGTCTCGGC	Background
CID44041_CGATGGCCATGCTGGC	Background
CID44041_CGCTGGATCATGCAAC	Background
CID44041_CGTCTACCAGCAGTTT	Background
CID44041_CTCACACCAAAGGCGT	Background
CID44041_CTCGGGAAGATAGTCA	Background
CID44041_CTTCTCTCATATGAGA	Background
CID44041_GAACCTAAGGTAAACT	Background
CID44041_GACACGCGTCTCCACT	Background
CID44041_GACCTGGAGACAGGCT	Background
CID44041_GACGTTACACTGCCAG	Background
CID44041_GAGTCCGTCCCAGGTG	Background
CID44041_GCATGATTCTACGAGT	Background
CID44041_GGAAAGCAGATAGGAG	Background
CID44041_GGCGACTCATGTCTCC	Background
CID44041_GTAACGTTCGGAGGTA	Background
CID44041_GTACTCCTCCCGGATG	Background
CID44041_GTACTTTAGCTCAACT	Background
CID44041_GTCATTTCACACCGAC	Background
CID44041_GTCATTTGTCTGGTCG	Background
CID44041_GTGCTTCTCTTGCCGT	Background
CID44041_TACAGTGGTTCAACCA	Background
CID44041_TAGAGCTGTTACTGAC	Background
CID44041_TAGAGCTTCAAGGTAA	Background
CID44041_TAGCCGGTCGTTTGCC	Background
CID44041_TATGCCCGTCTAGAGG	Background
CID44041_TCACGAATCTTATCTG	Background
CID44041_TCAGCAAAGTTCGCGC	Background
CID44041_TCGCGAGAGTGAATTG	Background
CID44041_TCGCGTTGTCCAGTAT	Background
CID44041_TCTGAGAAGAAAGTGG	Background
CID44041_TCTTCGGAGCGTGAGT	Background
CID44041_TGGTTAGGTCAAAGAT	Background
CID44041_TTAGGACTCATTCACT	Background
CID44041_TTGCCGTAGTTAAGTG	Background
CID44041_TTTCCTCGTCAGAATA	Background
CID44041_AACCATGCATGTAAGA	Background
CID44041_AACGTTGTCCCTTGCA	Background
CID44041_ACGCAGCCATATGGTC	Background
CID44041_ACTTGTTTCTTCATGT	Background
CID44041_CAACTAGAGTACACCT	Background
CID44041_CACATAGTCTAGCACA	Background
CID44041_CAGCCGAAGATCCGAG	Background
CID44041_CAGTCCTCACGCGAAA	Background
CID44041_CCCTCCTAGCGAAGGG	Background
CID44041_CGGCTAGTCAACCATG	Background
CID44041_CGTGTCTGTAGGAGTC	Background
CID44041_CTAATGGTCCTCATTA	Background
CID44041_CTCGAAATCCTATGTT	Background
CID44041_GACCTGGGTGGCAAAC	Background
CID44041_GCATGATGTACGACCC	Background
CID44041_TACTTACCACCTGGTG	Background
CID44041_TACTTACTCCAAAGTC	Background
CID44041_TGGTTCCGTAGCGCAA	Background
CID44041_TTAGGCACATGATCCA	Background
CID44041_TTGGCAAGTGGCAAAC	Background
CID44041_AGCCTAAGTTCTGTTT	Background
CID44041_AGCGTATAGGAGTACC	Background
CID44041_CACATAGAGCTTCGCG	Background
CID44041_CCTCTGACACGGCTAC	Background
CID44041_CGATGTATCCTTAATC	Background
CID44041_CGCCAAGTCAAAGACA	Background
CID44041_CGTGAGCCAATCACAC	Background
CID44041_GCTCCTAGTTTGGCGC	Background
CID44041_TCACAAGAGTCATCCA	Background
CID44041_TGATTTCAGTCATCCA	Background
CID44041_TGGTTAGCAATGCCAT	Background
CID44041_AAGTCTGCACGGACAA	Background
CID44041_ACTTGTTCAGCGTCCA	Background
CID44041_AGCCTAAAGATACACA	Background
CID44041_ATTCTACGTAATCGTC	Background
CID44041_ATTGGTGCATGGTCAT	Background
CID44041_CAACTAGGTCACACGC	Background
CID44041_CAGAGAGTCGATCCCT	Background
CID44041_CTCGGGATCTTCAACT	Background
CID44041_GGGACCTCACCAACCG	Background
CID44041_GTACGTAAGTAATCCC	Background
CID44041_GTACTCCAGTCTCCTC	Background
CID44041_GTATTCTAGTGAATTG	Background
CID44041_TCCCGATTCCATGCTC	Background
CID44041_TGGCTGGCACGCATCG	Background
CID44041_TGGCTGGCAGACACTT	Background
CID44041_TTCTCAATCGCCCTTA	Background
CID44041_GGTATTGAGATGCCTT	Background
CID44041_TGACAACAGCGAGAAA	Background
CID44041_CTCGAAAAGCTTATCG	Background
CID44041_GTAACTGAGTGTACCT	Background
CID44041_TTGCCGTTCAGCAACT	Background
CID44041_CATTATCAGCTGCGAA	Background
CID44041_TACACGACAGAGTGTG	Background
CID44041_AACTCCCAGTACCGGA	Background
CID44041_AACTTTCGTGGCCCTA	Background
CID44041_AAGACCTGTCAATGTC	Background
CID44041_ACAGCTATCGTACCGG	Background
CID44041_ACGAGGAAGAGTAAGG	Background
CID44041_AGAATAGTCCGCTGTT	Background
CID44041_ATCCGAAGTGTGAATA	Background
CID44041_CACACAAAGCCACGCT	Background
CID44041_CACCACTAGTTGCAGG	Background
CID44041_CATCAGACAACACCTA	Background
CID44041_CATGGCGTCCGCGTTT	Background
CID44041_CCTAGCTGTACTTCTT	Background
CID44041_CCTCTGACATCCCATC	Background
CID44041_CGCTGGAGTCAATGTC	Background
CID44041_CTACACCCATCCTAGA	Background
CID44041_GAATAAGTCTCTTATG	Background
CID44041_GATGCTATCACTTATC	Background
CID44041_GCGGGTTTCTACTTAC	Background
CID44041_GTCTTCGGTATAATGG	Background
CID44041_GTGCTTCAGGATGGTC	Background
CID44041_GTTCATTCAGGTCCAC	Background
CID44041_TAAGTGCGTTGCTCCT	Background
CID44041_TATCAGGCATGCTGGC	Background
CID44041_TCGGGACTCCCGACTT	Background
CID44041_TCTTCGGGTCGGCTCA	Background
CID44041_TGCCCATAGCGTCAAG	Background
CID44041_TGGCGCACACGGCCAT	Background
CID44041_TGTATTCTCCTGTACC	Background
CID44041_TGTTCCGAGCGGATCA	Background
CID44041_AAACCTGAGCGTAGTG	Background
CID44041_AAGTCTGAGTCTCCTC	Background
CID44041_AATCCAGGTGATGTGG	Background
CID44041_ACACCAATCAGTGTTG	Background
CID44041_ACAGCTACAGACACTT	Background
CID44041_ACGATGTCATGTCCTC	Background
CID44041_ACGGGTCTCGCAAGCC	Background
CID44041_ACTATCTGTTCCAACA	Background
CID44041_ACTTACTAGACAAGCC	Background
CID44041_ACTTTCAAGCTCCCAG	Background
CID44041_AGCATACTCCCAGGTG	Background
CID44041_AGTAGTCGTCAAGCGA	Background
CID44041_AGTAGTCTCCTCAATT	Background
CID44041_AGTCTTTCAAACTGCT	Background
CID44041_ATAAGAGGTTCAGGCC	Background
CID44041_ATAGACCTCCAGGGCT	Background
CID44041_ATCCACCGTAGAGCTG	Background
CID44041_ATTCTACGTTCATGGT	Background
CID44041_CAAGGCCTCACCAGGC	Background
CID44041_CACACCTCAGTCGATT	Background
CID44041_CACAGGCCATCTCGCT	Background
CID44041_CACCTTGAGACTAGAT	Background
CID44041_CCACCTATCAGAAATG	Background
CID44041_CCAGCGACAGCCAATT	Background
CID44041_CCAGCGATCATTATCC	Background
CID44041_CCATGTCGTATAGTAG	Background
CID44041_CCGTACTTCGTCGTTC	Background
CID44041_CCGTGGAGTCTCACCT	Background
CID44041_CCTATTAGTCACTTCC	Background
CID44041_CGATGGCCATCGGAAG	Background
CID44041_CGATTGACATATACGC	Background
CID44041_CGGAGTCAGTGATCGG	Background
CID44041_CGGAGTCTCCGAATGT	Background
CID44041_CGGCTAGCACAGATTC	Background
CID44041_CTCATTATCAGGTAAA	Background
CID44041_CTCTGGTTCCTCAATT	Background
CID44041_CTGAAGTCAGATTGCT	Background
CID44041_CTTCTCTCAATCTGCA	Background
CID44041_GAACCTAAGATCTGAA	Background
CID44041_GACGCGTTCATCGATG	Background
CID44041_GACGTTAAGCTAGTTC	Background
CID44041_GACGTTAAGGGCTTCC	Background
CID44041_GATTCAGAGTACCGGA	Background
CID44041_GCAGCCATCTTGCATT	Background
CID44041_GCAGTTATCCACGAAT	Background
CID44041_GCATACAGTTACAGAA	Background
CID44041_GCATGATGTGACGCCT	Background
CID44041_GCTGCGACACACCGCA	Background
CID44041_GGACATTAGGGTCGAT	Background
CID44041_GGATGTTTCTGTACGA	Background
CID44041_GGGCACTCAACAACCT	Background
CID44041_GGGTTGCGTGCACGAA	Background
CID44041_GTCTCGTAGCCTCGTG	Background
CID44041_GTGTGCGTCCGCGGTA	Background
CID44041_GTTCGGGAGAAACCAT	Background
CID44041_GTTTCTACATGGGAAC	Background
CID44041_TAAGAGATCCCACTTG	Background
CID44041_TAGAGCTTCGTACGGC	Background
CID44041_TATCAGGAGGATGGAA	Background
CID44041_TCAACGATCCTAAGTG	Background
CID44041_TCAGCAACAATCCGAT	Background
CID44041_TCCACACTCAGCTGGC	Background
CID44041_TCGAGGCGTGCGCTTG	Background
CID44041_TCGAGGCTCCACGTGG	Background
CID44041_TGCCCTACATATACGC	Background
CID44041_TGGGCGTCAGGGTTAG	Background
CID44041_TGTCCCAAGCGTAGTG	Background
CID44041_TTAACTCTCTGTGCAA	Background
CID44041_TTGCCGTCACTCTGTC	Background
CID44041_TTTATGCGTTGTACAC	Background
CID44041_TTCGGTCCAGACGCAA	Background
CID44041_AAAGCAACAAATACAG	Background
CID44041_ACTGAACGTTACGGAG	Background
CID44041_CGAGCCATCGTCTGCT	Background
CID44041_GGGCATCTCCAATGGT	Background
CID44041_ACAGCCGCATGCCCGA	Background
CID44041_ATTATCCCATTCGACA	Background
CID44041_CCAATCCTCATCGATG	Background
CID44041_CCATGTCTCCCTCTTT	Background
CID44041_CTGATCCTCTCCTATA	Background
CID44041_TCTCATACAGGGTACA	Background
CID44041_CCTTTCTAGCAGCCTC	Background
CID44041_AATCCAGGTTGTCTTT	Background
CID44041_AGAGCGATCAATCTCT	Background
CID44041_CACACTCAGTTCGCAT	Background
CID44041_AACCATGTCTTGCATT	Background
CID44041_AATCGGTCAGGCTCAC	Background
CID44041_ACAGCTAAGCGTTTAC	Background
CID44041_CAGCTGGTCTACCTGC	Background
CID44041_CAGGTGCCAGTAGAGC	Background
CID44041_CCACGGATCCGAACGC	Background
CID44041_CCCATACTCGCCTGTT	Background
CID44041_CGCGGTATCAGTCCCT	Background
CID44041_CTCACACGTCTCTCGT	Background
CID44041_GACGTGCTCCGAACGC	Background
CID44041_GACTACATCAGCTGGC	Background
CID44041_GATCGCGCAGGTGCCT	Background
CID44041_GCATGCGAGAGGGATA	Background
CID44041_GTCTTCGGTCGCGTGT	Background
CID44041_TGTGGTAAGAAGGACA	Background
CID44041_CCACTACGTCTCTCTG	Background
CID44041_GCTGGGTTCTATCCCG	Background
CID44041_GGACGTCAGTGAAGTT	Background
CID44041_GGTATTGTCACGGTTA	Background
CID44041_TATGCCCGTTAAAGTG	Background
CID44041_TCGTAGATCGCTGATA	Background
CID44041_TGACTTTAGGCAGGTT	Background
CID44041_AGAGCTTTCACAGGCC	Background
CID44041_CCTCAGTAGATGGGTC	Background
CID44041_AACCATGAGGACATTA	Background
CID44041_GTATTCTCAGGACGTA	Background
CID44041_ACCAGTATCCTAGTGA	Background
CID44041_GACGGCTTCAGCAACT	Background
CID44041_GCATGTACATTTCACT	Background
CID44041_TCAGCTCTCAGCTCTC	Background
CID44041_GTCTTCGGTTGTCTTT	Background
CID44041_ACTGAGTTCTTATCTG	Background
CID44041_AAACCTGAGACAAAGG	Background
CID44041_CGAGCACCACATGACT	Background
CID44041_GTAACGTAGCCTCGTG	Background
CID44041_TTGGCAATCTTATCTG	Background
CID44041_AACACGTCACCGGAAA	Background
CID44041_AACTCTTAGGTGCTAG	Background
CID44041_AACTGGTTCTTCCTTC	Background
CID44041_ACGAGCCAGGTTACCT	Background
CID44041_ACTGCTCGTTATCCGA	Background
CID44041_AGGGTGATCACGAAGG	Background
CID44041_AGGTCCGCAGCTTCGG	Background
CID44041_ATTACTCAGACTAAGT	Background
CID44041_ATTCTACTCTATCCCG	Background
CID44041_CAACCTCTCTTGGGTA	Background
CID44041_CACACAAGTGGTAACG	Background
CID44041_CACACAATCGGGAGTA	Background
CID44041_CAGATCAAGCATGGCA	Background
CID44041_CAGATCATCATGCATG	Background
CID44041_CAGCAGCTCTATCCTA	Background
CID44041_CAGCGACCACGAAATA	Background
CID44041_CAGTCCTCAGCGAACA	Background
CID44041_CATCCACCATGGGACA	Background
CID44041_CATTATCTCCCAACGG	Background
CID44041_CCTACACAGTCAAGCG	Background
CID44041_CCTATTACATATGCTG	Background
CID44041_CCTATTAGTGCACCAC	Background
CID44041_CCTTCCCGTCATACTG	Background
CID44041_CGATCGGCAAGAGTCG	Background
CID44041_CGGACTGGTTTAAGCC	Background
CID44041_CGGGTCACATACAGCT	Background
CID44041_CGTAGGCTCATCTGTT	Background
CID44041_CGTCACTCAGTCCTTC	Background
CID44041_CGTCTACAGAACAACT	Background
CID44041_CTAGCCTCACGGTAGA	Background
CID44041_CTGCCTAAGGGATGGG	Background
CID44041_GAAATGAAGCTAACTC	Background
CID44041_GAATAAGGTACATCCA	Background
CID44041_GAATGAATCTGATACG	Background
CID44041_GACGCGTCATTCCTCG	Background
CID44041_GACGTGCTCTAGAGTC	Background
CID44041_GACGTTAGTAATTGGA	Background
CID44041_GACGTTAGTGGCAAAC	Background
CID44041_GACTACACATTTGCTT	Background
CID44041_GACTACATCCAAATGC	Background
CID44041_GATCGATCACTCTGTC	Background
CID44041_GATCTAGTCGCCAAAT	Background
CID44041_GCAAACTTCTCCAGGG	Background
CID44041_GCACATATCCACTCCA	Background
CID44041_GCAGCCATCAGTTAGC	Background
CID44041_GCATGATGTCTTCTCG	Background
CID44041_GCATGCGTCGCACTCT	Background
CID44041_GCCAAATTCCATGAAC	Background
CID44041_GCGCAGTCAGCTCGCA	Background
CID44041_GCGCAGTTCAGTTAGC	Background
CID44041_GCTGGGTTCGTTTGCC	Background
CID44041_GGCGTGTAGCAATATG	Background
CID44041_GTCAAGTAGCTGAACG	Background
CID44041_GTGGGTCTCCAATGGT	Background
CID44041_TAAGAGACAAAGTGCG	Background
CID44041_TAAGCGTAGATGTGTA	Background
CID44041_TAGACCATCCTGCAGG	Background
CID44041_TAGCCGGTCACGCGGT	Background
CID44041_TCAGGATCAATCACAC	Background
CID44041_TCTTCGGAGAGCTGGT	Background
CID44041_TCTTCGGGTCTGGAGA	Background
CID44041_TGACAACCACACCGCA	Background
CID44041_TGAGCATCACGTGAGA	Background
CID44041_TGAGCCGCAATAAGCA	Background
CID44041_TGCACCTAGAAACCGC	Background
CID44041_TGCTACCAGAGTACAT	Background
CID44041_TGGCGCAGTGAACCTT	Background
CID44041_TGGCTGGCACTGTCGG	Background
CID44041_TGGGCGTAGCTAGGCA	Background
CID44041_TTAACTCGTGGGTATG	Background
CID44041_TTAGGCAGTCAATGTC	Background
CID44041_TTAGTTCTCTGCCAGG	Background
CID44041_TTCTTAGAGTGTCTCA	Background
CID44041_TTGACTTAGGGAACGG	Background
CID44041_TTGCGTCCAGTACACT	Background
CID44041_TTGGCAATCGACCAGC	Background
CID44041_TTTATGCCACTTGGAT	Background
CID44041_AGTTGGTTCAAACCAC	Background
CID44041_ATTTCTGAGTCGATAA	Background
CID44041_CATATTCTCACCGTAA	Background
CID44041_CATCAAGAGGCTAGGT	Background
CID44041_CGAACATCAAGAAAGG	Background
CID44041_ATTGGTGAGTATTGGA	Background
CID44041_CTGCCTACAACCGCCA	Background
CID44041_AACTGGTGTAAGTGGC	Background
CID44041_ACGGAGAAGTCCAGGA	Background
CID44041_ACGTCAAGTAGAAAGG	Background
CID44041_CACACTCGTCCGTGAC	Background
CID44041_CACAGTATCTGTTTGT	Background
CID44041_CATCGGGTCCGTTGCT	Background
CID44041_CCACTACGTACTTCTT	Background
CID44041_CGAGAAGTCGGTGTCG	Background
CID44041_CGTAGGCCAGTAGAGC	Background
CID44041_CTAATGGTCGGCGCTA	Background
CID44041_CTCTACGCATTAGGCT	Background
CID44041_CTTCTCTGTCGACTAT	Background
CID44041_GATCGCGCATAGACTC	Background
CID44041_GCGACCATCGTTTAGG	Background
CID44041_GCTGCTTCAGGGCATA	Background
CID44041_GCTTCCAAGAGTTGGC	Background
CID44041_TTGGCAAGTAAACCTC	Background
CID44041_CAACCAACAGGGTACA	Background
CID44041_CTGCTGTTCCTGCAGG	Background
CID44041_CGATGTAGTGGCGAAT	Background
CID44041_AGATTGCCACAACGCC	Background
CID44041_CACACTCAGGTGCTTT	Background
CID44041_CGACTTCAGGGAACGG	Background
CID44041_TCACAAGGTAGAAGGA	Background
CID44041_GAACCTACAAGGACTG	Background
CID44041_CGCGTTTAGCTGAACG	Background
CID44041_AAACGGGAGAGAGCTC	Background
CID44041_AACGTTGAGAACAATC	Background
CID44041_ACGATACAGTCTTGCA	Background
CID44041_AGCAGCCGTCCGCTGA	Background
CID44041_CATATGGCATCCGCGA	Background
CID44041_CGACCTTGTGTCCTCT	Background
CID44041_CGCGGTAAGCTAACAA	Background
CID44041_GCATGTACACCAGGTC	Background
CID44041_TACCTTAAGAGGTTGC	Background
CID44041_TATCTCATCACGCATA	Background
CID44041_TTTGCGCGTGAGGGTT	Background
CID44041_CCTTTCTGTGTTTGGT	Background
CID44041_TTGTAGGAGCGTTCCG	Background
CID44041_AAAGATGTCTCAAGTG	Background
CID44041_CGAGAAGGTCCCGACA	Background
CID44041_TAAACCGGTCATTAGC	Background
CID44041_ACTGAACCACAGCGTC	Background
CID44041_AGCCTAAGTGCAACTT	Background
CID44041_AGGCCGTCATTGTGCA	Background
CID44041_CAGCCGAAGTGCGTGA	Background
CID44041_CGACCTTGTCAGCTAT	Background
CID44041_CTCATTACAATCACAC	Background
CID44041_GTATTCTAGCACCGTC	Background
CID44041_TCTCATAAGGAGTACC	Background
CID44041_TGGTTAGAGGCTCAGA	Background
CID44041_TTCTACACACATTCGA	Background
CID44041_TTGAACGGTGAAATCA	Background
CID44041_CTCATTAGTTGGGACA	Background
CID44041_GAACCTATCGGTCTAA	Background
CID44041_TACAGTGTCAGTACGT	Background
CID44041_GCCTCTAGTAAGCACG	Background
CID44041_TGATTTCCAAACGTGG	Background
CID44041_GACTAACTCTGACCTC	Background
CID44041_GATGAGGTCACGATGT	Background
CID44041_TATCTCACACGTCAGC	Background
CID44041_AAGCCGCCAACTTGAC	Background
CID44041_CTAGTGATCTCCCTGA	Background
CID44041_TGCCCTAAGTCTCCTC	Background
CID44041_ACGTCAATCACGGTTA	Background
CID44041_CTTAGGATCCCTGACT	Background
CID44041_ATCCGAACAAAGCGGT	Background
CID44041_CGATGGCGTCTGGAGA	Background
CID44041_GGGAGATGTAGCCTCG	Background
CID44041_CATCGAACATTATCTC	Background
CID44041_GATCGTACACCATGTA	Background
CID44041_AAGTCTGGTTCAGACT	Background
CID44041_CGGGTCAGTCCATGAT	Background
CID44041_GGCCGATGTTAAGATG	Background
CID44041_TCGGGACTCCGATATG	Background
CID44041_CCCATACGTACAGTTC	Background
CID44041_GTAGGCCTCATACGGT	Background
CID44041_CCTCAGTCAGATAATG	Background
CID44041_GGTATTGGTACCATCA	Background
CID44041_TAGCCGGCAATCGGTT	Background
CID44041_TGCTGCTGTTAAAGTG	Background
CID44041_ACATCAGCATCAGTCA	Background
CID44041_TGAGAGGGTTTGGCGC	Background
CID44041_CCGTTCAAGTGGGATC	Background
CID44041_CACACCTTCGTGTAGT	Background
CID44041_CTGCTGTTCGGTTAAC	Background
CID44041_GCATGATGTTCCCTTG	Background
CID44041_GTGAAGGTCGGAAACG	Background
CID44041_TCAGGATTCGTACCGG	Background
CID44041_TCTCTAACAGTACACT	Background
CID44041_CATCGGGTCCGTCATC	Background
CID44041_CTAGAGTGTCATATCG	Background
CID44041_GCTGCTTTCAGAGCTT	Background
CID44041_GGACGTCGTATAGGTA	Background
CID44041_GGTGTTAAGGTTACCT	Background
CID44041_TGGTTCCTCAGAAATG	Background
CID44041_AGACGTTTCGTTTAGG	Background
CID44041_CAGCGACTCTACGAGT	Background
CID44041_GCTGCGAGTTGTGGAG	Background
CID44041_TGACTAGGTGACCAAG	Background
CID44041_TTGGCAATCGTCTGCT	Background
CID44041_CAAGATCAGCAGACTG	Background
CID44041_CCGTACTAGCAGATCG	Background
CID44041_CTGTTTAAGGCTAGCA	Background
CID44041_GCATGCGCAACTGGCC	Background
CID44041_GCGCAGTTCTAACTTC	Background
CID44041_AACGTTGAGTTTAGGA	Background
CID44041_TGGGAAGCATGGAATA	Background
CID44041_GCTGCGAAGGGTCTCC	Background
CID44041_GTGTTAGGTTCTGGTA	Background
CID44041_CCTCAGTAGGGCACTA	Background
CID44041_CTGATAGAGCTAGTTC	Background
CID44041_GCTTCCATCACAGGCC	Background
CID44041_TTCTCAACAAGACACG	Background
CID44041_CGGACTGTCCTCAATT	Background
CID44041_GTCGGGTCAGGCTGAA	Background
CID44041_TTTACTGAGACCTTTG	Background
CID44041_CCACTACTCGGTCTAA	Background
CID44041_ACACCCTGTTCCACTC	Background
CID44041_ACCGTAACAAGAGTCG	Background
CID44041_CCGTTCATCCGCATCT	Background
CID44041_TATTACCCACTAGTAC	Background
CID44041_AGCGGTCGTTATGCGT	Background
CID44041_CACACAACAGCGAACA	Background
CID44041_TCAACGAGTCTCTTAT	Background
CID44041_ACGCCAGCAAATCCGT	Background
CID44041_AGAATAGTCCTTAATC	Background
CID44041_ATAACGCTCATGGTCA	Background
CID44041_GACCTGGCAATAGAGT	Background
CID44041_TCGTAGATCTACTTAC	Background
CID44041_GTCTCGTTCGAGAACG	Background
CID44041_ACGAGCCGTCCTCTTG	Background
CID44041_GGAAAGCTCCGTACAA	Background
CID44041_GTTCATTCAGACGCAA	Background
CID44041_AAAGTAGCATTACGAC	Background
CID44041_AGCCTAAGTATGAAAC	Background
CID44041_AGCGTCGGTTACGCGC	High-Risk
CID44041_AGCTTGACAACTGGCC	Background
CID44041_AGGGAGTGTGCACTTA	Background
CID44041_CACCAGGCACATGACT	Background
CID44041_CAGAGAGTCCGAATGT	Background
CID44041_CCATGTCAGCGTAATA	Background
CID44041_CCGGTAGTCGGAGGTA	Background
CID44041_CCTTTCTTCGCGTAGC	Background
CID44041_CGACCTTAGACAGACC	Background
CID44041_CGACTTCCAGTAAGCG	Background
CID44041_CGAGCACAGCATCATC	Background
CID44041_CGGCTAGTCTTTACGT	Background
CID44041_CTCGAGGCATCGATTG	Background
CID44041_CTTTGCGGTCAAAGAT	Background
CID44041_GCACTCTGTGGTCCGT	Background
CID44041_GCGAGAAGTCTTTCAT	Background
CID44041_GCTGGGTCAAGTCTGT	Background
CID44041_GTCACAAAGTACCGGA	Background
CID44041_GTCTCGTCAAGCCCAC	Background
CID44041_TGCCAAACAAGTACCT	Background
CID44041_TGCCCTACAATGAAAC	Background
CID44041_TGCGCAGGTTAAAGTG	Background
CID44041_TGTATTCTCGATGAGG	Background
CID44041_TTGTAGGTCTCTGAGA	Background
CID44041_AGCTTGAGTCCCTACT	Background
CID44041_GCATACAGTGTATGGG	Background
CID44041_GTCCTCAAGCACAGGT	Background
CID44041_TAGAGCTAGGATCGCA	Background
CID44041_TCGAGGCAGAATCTCC	Background
CID44041_AGCTCTCTCACCGGGT	Background
CID44041_AGTGTCAGTCAACTGT	Background
CID44041_CATGCCTCATTTCAGG	Background
CID44041_GTTCTCGAGGCTAGGT	Background
CID44041_TGACGGCCAGCTATTG	Background
CID44041_TGGCCAGGTCTTGTCC	Background
CID44041_CTACATTTCTCCGGTT	Background
CID44041_GTACTTTTCGCCGTGA	Background
CID44041_ACTTACTAGTCAATAG	Background
CID44041_AGAGTGGTCGCAAGCC	Background
CID44041_AGCAGCCGTCACCCAG	Background
CID44041_ATAACGCCAGACAAGC	Background
CID44041_CACAGTATCACATACG	Background
CID44041_CATTATCCAATCCGAT	Background
CID44041_CATTCGCCAGTACACT	Background
CID44041_CCCAATCCAAGGCTCC	Background
CID44041_CTCTGGTGTAAATGAC	Background
CID44041_GACTGCGAGTACGACG	Background
CID44041_GGACAAGAGATCCTGT	Background
CID44041_GGATGTTCACATGTGT	Background
CID44041_GGTGCGTAGAGCTGCA	Background
CID44041_GTAACTGAGACAAAGG	Background
CID44041_GTAACTGCAACGCACC	Background
CID44041_GTAGGCCGTCTTGATG	Background
CID44041_TCAATCTTCCGTCATC	Background
CID44041_TCACAAGAGGCTCAGA	Background
CID44041_TCACGAAAGGCCCTTG	Background
CID44041_TCAGCTCGTAGATTAG	Background
CID44041_TCGGGACAGCAATATG	Background
CID44041_TCTGGAAGTCATATGC	Background
CID44041_TGAAAGACACGCTTTC	Background
CID44041_TGAGAGGGTTATCACG	Background
CID44041_TTATGCTTCTCGATGA	Background
CID44041_TTGACTTGTAGCCTAT	Background
CID44041_TTTGCGCGTTCCGGCA	Background
CID44041_AATCGGTTCCAGAGGA	Background
CID44041_CAGCTAAGTCTTGTCC	Background
CID44041_CATCGGGCATAGTAAG	Background
CID44041_CATGACAGTCAAAGCG	Background
CID44041_CGTTCTGGTCAACTGT	Background
CID44041_CTGCCTATCTGTTGAG	Background
CID44041_GTTAAGCGTTAAGACA	Background
CID44041_CTCATTACATCCGGGT	Background
CID44041_AGGTCCGCACGAGAGT	Background
CID44041_GCTGCTTCATTCTCAT	Background
CID44041_TGCCAAAGTTGTACAC	Background
CID44041_TGTATTCCAGACGCTC	Background
CID44041_CCTTTCTCAGCCTTTC	Background
CID44041_GACGTGCTCTCTGCTG	Background
CID44041_GTTTCTACAGCCTGTG	Background
CID44041_GCTGCGAAGAGCCTAG	Background
CID44041_GGCGTGTCAATGAAAC	Background
CID44041_TCGGTAAGTGTGAATA	Background
CID44041_CATGGCGAGATCTGAA	Background
CID44041_TTTGTCACAATGGATA	Background
CID44041_AGCGTCGGTTTAGGAA	Background
CID44041_GAGCAGAGTGGCCCTA	Background
CID44041_TATCAGGGTAAAGGAG	Background
CID44041_TGCCCATAGGCCCGTT	Background
CID44041_CTTAACTTCGGATGGA	Background
CID44041_AACTCCCCATCTCCCA	Background
CID44041_AAGGTTCAGGCAGGTT	Background
CID44041_ACGATACGTTACGTCA	Background
CID44041_ACGGGCTGTGAAAGAG	Background
CID44041_ACTATCTTCCCTTGCA	Background
CID44041_ACTTTCAAGAAACGCC	Background
CID44041_ACTTTCATCTAGAGTC	Background
CID44041_AGCAGCCGTAGCGATG	Background
CID44041_AGGGAGTTCGTGGGAA	Background
CID44041_AGGGTGACATCGGACC	Background
CID44041_AGTAGTCAGAGAGCTC	Background
CID44041_ATAACGCTCTGCCCTA	Background
CID44041_ATCACGACACAAGACG	Background
CID44041_ATCCACCTCACATACG	Background
CID44041_ATCCACCTCAGTGCAT	Background
CID44041_ATTATCCTCCTCCTAG	Background
CID44041_CACATAGTCAGCGACC	Background
CID44041_CAGCCGACATGTCGAT	Background
CID44041_CAGGTGCCATCGGTTA	Background
CID44041_CATCAAGAGACTTGAA	Background
CID44041_CATGACATCAACACGT	Background
CID44041_CGGACTGGTAAATGTG	Background
CID44041_CGGAGCTGTGATGTCT	Background
CID44041_CGTCTACCAGTGGAGT	Background
CID44041_CGTGAGCCATATGAGA	Background
CID44041_CTGCTGTCACGTTGGC	Background
CID44041_GAACGGACATACTACG	Background
CID44041_GAATAAGTCTTGCCGT	Background
CID44041_GACAGAGCAATACGCT	Background
CID44041_GACGCGTAGTACGATA	Background
CID44041_GATGAGGTCAGTTCGA	Background
CID44041_GCACTCTAGTTCCACA	Background
CID44041_GCGCCAATCTACCTGC	Background
CID44041_GGCTCGAGTGAAATCA	Background
CID44041_GGGAGATGTTTGTGTG	Background
CID44041_GGTGTTAAGGGTCTCC	Background
CID44041_GTAACGTAGTTGCAGG	Background
CID44041_TACCTTACACTGTCGG	Background
CID44041_TCGGGACTCGTCTGAA	Background
CID44041_TGAAAGAAGGAGTTTA	Background
CID44041_TGCCAAATCAGCATGT	Background
CID44041_TGCGGGTTCGTCCAGG	Background
CID44041_TGGCTGGCAGCTGTGC	Background
CID44041_TTAGGCACATGGTAGG	Background
CID44041_TTGTAGGCAGCTCGAC	Background
CID44041_AACCATGAGCCAACAG	Background
CID44041_AACCATGCATGAGCGA	Background
CID44041_AAGGAGCGTACGAAAT	Background
CID44041_ACAGCCGTCTGTACGA	Background
CID44041_ACGATACCATGCAATC	Background
CID44041_ACGCCGATCAACCAAC	Background
CID44041_ACTGAACAGTGTACTC	Background
CID44041_AGAGCTTCAAAGGAAG	Background
CID44041_AGCATACGTGGTGTAG	Background
CID44041_ATAGACCAGCCGGTAA	Background
CID44041_ATCGAGTGTTCCCGAG	Background
CID44041_CAAGATCTCCGTTGCT	Background
CID44041_CACAAACAGTGTGGCA	Background
CID44041_CAGATCAGTGCACTTA	Background
CID44041_CAGCGACAGGTTCCTA	Background
CID44041_CATATGGAGTTAGCGG	Background
CID44041_CATCCACCAATGGATA	Background
CID44041_CATGACAAGACTAAGT	Background
CID44041_CCACGGAAGGGAGTAA	Background
CID44041_CCACTACAGAAGGCCT	Background
CID44041_CCTACCACAGATCGGA	Background
CID44041_CCTCAGTTCCAGGGCT	Background
CID44041_CGAATGTTCAAAGACA	Background
CID44041_CGAGCCAGTCAATACC	Background
CID44041_CGCTATCTCTGTTGAG	Background
CID44041_CGTAGGCGTGAAGGCT	Background
CID44041_CGTCCATGTCATTAGC	Background
CID44041_CTCCTAGGTACGCTGC	Background
CID44041_CTTCTCTGTCTAAACC	Background
CID44041_GACGTGCCAAAGCGGT	Background
CID44041_GTACTTTTCTGCCAGG	Background
CID44041_GTCGGGTCACATGACT	Background
CID44041_GTGGGTCGTCGCGGTT	Background
CID44041_TACCTTACAGTTCCCT	Background
CID44041_TGCGGGTGTCGCTTCT	Background
CID44041_TGGCGCAGTCTGCCAG	Background
CID44041_TGTTCCGTCTTAGCCC	Background
CID44041_TTGGCAAGTACTCAAC	Background
CID44041_TTTGTCACACATCTTT	Background
CID44041_ACGCCGAGTTAGAACA	Background
CID44041_ACTTGTTTCGTCCAGG	Background
CID44041_ATCTACTGTCGGCATC	Background
CID44041_GAACGGACACGAGAGT	Background
CID44041_GTGCAGCAGACACTAA	Background
CID44041_TAGAGCTTCAGCTTAG	Background
CID44041_TGAGGGAAGATCCCGC	Background
CID44041_ATTCTACAGCTAGGCA	Background
CID44041_CTAAGACGTATATCCG	Background
CID44041_GGATTACAGAGTGACC	Background
CID44041_TCTCATAAGCCACGTC	Background
CID44041_CCGGGATCAATGGAAT	Background
CID44041_ACACTGAGTAAACACA	Background
CID44041_CATCCACGTCGACTGC	Background
CID44041_CGCTGGAAGTTGAGTA	Background
CID44041_CGGACGTGTACTTCTT	Background
CID44041_CTAACTTCACTGTGTA	Background
CID44041_GGGAGATTCAAGGCTT	Background
CID44041_TAAGTGCTCGGTGTCG	Background
CID44041_TGGTTAGAGGCCGAAT	Background
CID44041_CGATCGGAGAATGTGT	Background
CID44041_AAACCTGCAAGACACG	High-Risk
CID44041_AAAGCAAGTCATACTG	High-Risk
CID44041_AACCATGTCGGCGCAT	High-Risk
CID44041_AATCCAGTCTCGTATT	High-Risk
CID44041_ACATACGGTTAAGTAG	High-Risk
CID44041_ACCTTTACAAGTCTGT	High-Risk
CID44041_ACGAGCCCACAGGTTT	High-Risk
CID44041_ACGGAGAAGGTAAACT	High-Risk
CID44041_ACGGGCTAGGTTACCT	High-Risk
CID44041_AGCGTATGTACTTCTT	High-Risk
CID44041_AGGCCGTTCAGATAAG	High-Risk
CID44041_AGGTCATAGGCCATAG	High-Risk
CID44041_ATGGGAGCACAACGTT	High-Risk
CID44041_CAAGGCCCAGTAAGCG	High-Risk
CID44041_CACTCCAAGCATGGCA	High-Risk
CID44041_CAGAATCCATCCGTGG	High-Risk
CID44041_CAGCGACTCATGTCCC	High-Risk
CID44041_CATCGAAGTTCCAACA	High-Risk
CID44041_CCATTCGGTGGGTATG	High-Risk
CID44041_CCTACCAAGAATGTGT	High-Risk
CID44041_CGACCTTTCTCCCTGA	High-Risk
CID44041_CGAGCCACAAAGGTGC	High-Risk
CID44041_CGGAGCTTCATCACCC	High-Risk
CID44041_CGGAGTCAGATCCGAG	High-Risk
CID44041_CGTAGCGCACCGATAT	High-Risk
CID44041_CGTTCTGGTTATGCGT	High-Risk
CID44041_CTACCCAAGTGCTGCC	High-Risk
CID44041_CTACGTCGTGTTCTTT	High-Risk
CID44041_CTCATTACACTGTCGG	High-Risk
CID44041_CTCGAAACAAGCTGAG	High-Risk
CID44041_CTCGGGACAAGAGTCG	High-Risk
CID44041_CTGTGCTAGCTGTCTA	High-Risk
CID44041_GACCTGGGTCATATGC	High-Risk
CID44041_GATTCAGCAGCCTTTC	High-Risk
CID44041_GCAATCATCGTCCAGG	High-Risk
CID44041_GCATGCGTCCCGGATG	High-Risk
CID44041_GCGCAACTCTTGAGAC	High-Risk
CID44041_GCGGGTTTCATCTGTT	High-Risk
CID44041_GCTCCTACACAGACAG	High-Risk
CID44041_GCTGGGTAGATAGCAT	Background
CID44041_GGACAAGAGTTACCCA	High-Risk
CID44041_GGACGTCTCGATAGAA	High-Risk
CID44041_GGCGACTAGAGCTGGT	High-Risk
CID44041_GTCGTAATCTCTTATG	High-Risk
CID44041_GTTACAGAGTCATGCT	High-Risk
CID44041_GTTTCTAGTACTCTCC	High-Risk
CID44041_TACAGTGCAATGGAGC	High-Risk
CID44041_TACTCGCTCAGGATCT	High-Risk
CID44041_TATGCCCGTAGCGTAG	High-Risk
CID44041_TCAACGAGTCACTGGC	High-Risk
CID44041_TCTGAGAAGGAATGGA	High-Risk
CID44041_TGACGGCAGAATGTTG	High-Risk
CID44041_TGAGCATGTAGTGAAT	High-Risk
CID44041_TGAGCCGTCAACACCA	High-Risk
CID44041_TGCACCTAGAAGGTGA	High-Risk
CID44041_TGGGAAGCATAGACTC	High-Risk
CID44041_TGGTTCCCACATGTGT	High-Risk
CID44041_TGTCCCAAGAAAGTGG	High-Risk
CID44041_TTAGTTCCATCTACGA	High-Risk
CID44041_TTGGAACCATATGGTC	High-Risk
CID44041_TTGGAACTCGGCCGAT	High-Risk
CID44041_TTTACTGCAGACGCCT	High-Risk
CID44041_CTCGAGGCACAAGTAA	High-Risk
CID44041_TGGCGCATCGCAAGCC	High-Risk
CID44041_TGTATTCGTTCAACCA	High-Risk
CID44041_ACTGAACCATAACCTG	High-Risk
CID44041_AAATGCCTCTGCTTGC	High-Risk
CID44041_ATCCACCAGAATGTTG	High-Risk
CID44041_CATCAAGGTAAACACA	High-Risk
CID44041_TAGTTGGCATGCCTTC	High-Risk
CID44041_TGAGAGGCATGTTGAC	High-Risk
CID44041_AAACCTGAGGCTACGA	High-Risk
CID44041_AACTCCCCACACTGCG	High-Risk
CID44041_ACCCACTGTCGACTGC	High-Risk
CID44041_ACGGGCTCACAGATTC	High-Risk
CID44041_AGCTCTCTCCAAACAC	High-Risk
CID44041_AGCTTGATCCATGAGT	High-Risk
CID44041_CAGCAGCGTCGCATAT	High-Risk
CID44041_CATATTCGTGATAAGT	High-Risk
CID44041_CATCCACGTTCGCGAC	High-Risk
CID44041_CCGGTAGCACGGTAAG	High-Risk
CID44041_CGCTTCATCTGCCCTA	High-Risk
CID44041_GGGTTGCAGAAAGTGG	High-Risk
CID44041_GTCGGGTTCTCGTATT	High-Risk
CID44041_TAGAGCTAGGTAAACT	High-Risk
CID44041_TGCGCAGTCAGCATGT	High-Risk
CID44041_TGGGAAGTCTGCAAGT	High-Risk
CID44041_TTAGGCAGTTGCGTTA	High-Risk
CID44041_TTCTCCTTCTACCAGA	High-Risk
CID44041_CTTACCGCATCAGTCA	Background
CID44041_CACCAGGTCCATGAGT	Background
CID44041_TGCCCATCACCGAATT	Background
CID44041_AAGCCGCGTAGTACCT	High-Risk
CID44041_ACGAGGACACCTATCC	High-Risk
CID44041_ACTTGTTCAATCGAAA	High-Risk
CID44041_ACTTTCAGTCATGCAT	High-Risk
CID44041_CCTAAAGAGTCCCACG	High-Risk
CID44041_CTAAGACAGTGGAGAA	High-Risk
CID44041_GACCAATTCAACCATG	High-Risk
CID44041_GTTACAGAGGCTACGA	High-Risk
CID44041_TGAGCATAGCCCAGCT	High-Risk
CID44041_AACTCAGCACATGGGA	High-Risk
CID44041_ACCTTTAGTACCGTTA	High-Risk
CID44041_ACTTTCATCCGCGCAA	High-Risk
CID44041_AGCATACAGATCCCGC	High-Risk
CID44041_AGCATACCATGGATGG	Background
CID44041_AGCTCCTAGAGCTGGT	High-Risk
CID44041_AGCTCCTTCGCCGTGA	High-Risk
CID44041_AGGTCATGTCCGAACC	High-Risk
CID44041_AGTGTCATCTGGAGCC	High-Risk
CID44041_CAACCAACAGGACGTA	High-Risk
CID44041_CAGATCAAGTAACCCT	High-Risk
CID44041_CCACCTAAGTTGTAGA	High-Risk
CID44041_CGGAGTCAGAGCCCAA	Background
CID44041_GACTGCGAGCTGGAAC	High-Risk
CID44041_GATCAGTGTAGCTCCG	High-Risk
CID44041_GCTTCCACATGCGCAC	High-Risk
CID44041_GTAACTGTCGAACTGT	High-Risk
CID44041_GTATTCTCATCAGTCA	High-Risk
CID44041_GTGGGTCTCTCTGTCG	High-Risk
CID44041_GTTCTCGGTGACGGTA	High-Risk
CID44041_TATCTCAGTCGAGATG	High-Risk
CID44041_TCGCGAGCAGTTCATG	High-Risk
CID44041_TCGTACCGTAAATGTG	High-Risk
CID44041_TCTGAGACAGACGCTC	High-Risk
CID44041_TCTTCGGCACCCATTC	Background
CID44041_TGGCCAGAGGCTAGAC	High-Risk
CID44041_TGGTTAGCACCGCTAG	High-Risk
CID44041_CAAGAAACAATGAAAC	High-Risk
CID44041_AAGTCTGAGGGCTCTC	High-Risk
CID44041_ACGATGTAGGATATAC	High-Risk
CID44041_CGAGAAGCAGGGATTG	High-Risk
CID44041_CGTTGGGGTCTAGTCA	Background
CID44041_GGGAGATTCAGCATGT	High-Risk
CID44041_ACGAGCCGTCCAAGTT	Background
CID44041_AGCTCCTCAGCGTCCA	Background
CID44041_AGGCCGTAGGTGATTA	Background
CID44041_AGTTGGTCAGCGATCC	Background
CID44041_ATCTGCCGTGACAAAT	Background
CID44041_CAAGATCTCGCAAACT	Background
CID44041_CAGAATCCAGGGAGAG	Background
CID44041_CATCGAAGTTTAGCTG	Background
CID44041_CATTCGCAGGTGGGTT	Background
CID44041_CCTCAGTCACGCGAAA	Background
CID44041_CCTCTGAAGTGTTAGA	Background
CID44041_GACTGCGCACCATGTA	Background
CID44041_GATGAAAAGCTGATAA	Background
CID44041_GCTGCAGAGTATTGGA	Background
CID44041_GCTGCAGGTGGTAACG	Background
CID44041_GGAACTTGTCGCCATG	Background
CID44041_GGATGTTAGCCTATGT	Background
CID44041_GGCAATTTCGACAGCC	Background
CID44041_GGGCACTCATCACGTA	Background
CID44041_GTGCAGCCAGGCGATA	Background
CID44041_GTTTCTAAGTCTCCTC	Background
CID44041_TCAGGTAGTTCTGTTT	Background
CID44041_TCATTTGTCACCGTAA	Background
CID44041_TCGCGTTCACCGATAT	Background
CID44041_TCTGAGATCAGTTAGC	Background
CID44041_TTATGCTAGTACGCCC	Background
CID44041_TTGGCAAGTAAAGGAG	Background
CID44041_TTGTAGGAGAGTTGGC	Background
CID44041_AAACCTGCATGAACCT	Background
CID44041_AACGTTGAGCTACCTA	Background
CID44041_AACTCAGCAGGGATTG	Background
CID44041_AACTCTTGTTCCGTCT	Background
CID44041_AAGGAGCTCGGCCGAT	Background
CID44041_AAGGCAGAGCTCCCAG	Background
CID44041_ACGGGTCAGTAACCCT	Background
CID44041_ACGGGTCCAACACGCC	Background
CID44041_ACTGAACTCCTTTACA	Background
CID44041_ACTGATGAGTGGGATC	Background
CID44041_ACTGCTCAGATAGGAG	Background
CID44041_AGCAGCCAGAAAGTGG	Background
CID44041_AGGTCATCACCTTGTC	Background
CID44041_ATAACGCAGATCCTGT	Background
CID44041_ATGGGAGGTAGCGTGA	Background
CID44041_ATTTCTGAGAAGAAGC	Background
CID44041_CAACCAATCTTCCTTC	Background
CID44041_CAACCTCCAGCGTAAG	Background
CID44041_CAAGATCTCTGACCTC	Background
CID44041_CACATAGTCTGGTGTA	Background
CID44041_CACCTTGTCTTCGAGA	Background
CID44041_CAGAATCAGGGTCTCC	Background
CID44041_CAGCATATCCAATGGT	Background
CID44041_CATATTCCATGCCCGA	Background
CID44041_CCACCTAGTCAACTGT	Background
CID44041_CCTCAGTGTTCCGGCA	Background
CID44041_CGAACATGTGTTGAGG	Background
CID44041_CGCGTTTTCCAAATGC	Background
CID44041_CGCTATCGTCGTCTTC	Background
CID44041_CGGCTAGGTGACTACT	Background
CID44041_CTCGAGGGTCAATACC	Background
CID44041_CTGATCCCAGGCGATA	Background
CID44041_CTGCCTAAGCTTTGGT	Background
CID44041_CTGCTGTGTGTTTGGT	Background
CID44041_CTTAGGATCCAATGGT	Background
CID44041_GCATGCGAGGACAGAA	Background
CID44041_GCTCTGTGTGACTACT	Background
CID44041_GGACAAGAGTTCGCAT	Background
CID44041_GGACGTCTCCCACTTG	Background
CID44041_GGCGACTCACAAGCCC	Background
CID44041_GGGAGATTCCTAGGGC	Background
CID44041_GGGCACTGTGTAAGTA	Background
CID44041_GTAACGTGTCTAAACC	Background
CID44041_GTGTTAGAGCGATTCT	Background
CID44041_TAGCCGGTCTGTCAAG	Background
CID44041_TAGTTGGTCTATGTGG	Background
CID44041_TATCTCAAGGCATGGT	Background
CID44041_TCAACGAAGCCACGCT	Background
CID44041_TCGAGGCTCACATACG	Background
CID44041_TCGTACCCACGAAATA	Background
CID44041_TCTGGAAGTCGCGGTT	Background
CID44041_TCTTCGGCAGCTTCGG	Background
CID44041_TGAGGGACAAGGCTCC	Background
CID44041_TGCCCTATCGATCCCT	Background
CID44041_TGCGCAGAGCGAAGGG	Background
CID44041_TGCGTGGCATCACGTA	Background
CID44041_TGCGTGGTCGGCCGAT	Background
CID44041_TGTGGTAGTCTCCCTA	Background
CID44041_TGTGTTTTCTACTTAC	Background
CID44041_TTCTACATCTGGTTCC	Background
CID44041_TTCTCAACACTGTCGG	Background
CID44041_AAACGGGAGTGTCCCG	Background
CID44041_AGAGTGGGTTACGGAG	Background
CID44041_ATCATCTTCAACGGCC	Background
CID44041_CTGATCCCAAGCTGTT	Background
CID44041_GTGGGTCGTAACGCGA	Background
CID44041_GTTACAGCACAGATTC	Background
CID44041_TTTATGCGTAATAGCA	Background
CID44041_AACACGTTCACCTTAT	Background
CID44041_AACGTTGAGTTAGGTA	Background
CID44041_ACAGCCGTCCGTAGTA	Background
CID44041_ACCAGTATCTTTCCTC	Background
CID44041_ACTGTCCCACACAGAG	Background
CID44041_AGCCTAAAGATCGATA	Background
CID44041_AGTGGGACACCCTATC	Background
CID44041_AGTGTCATCGTTGACA	Background
CID44041_ATAACGCCAAAGCAAT	Background
CID44041_ATCCGAACACCAACCG	Background
CID44041_ATGTGTGAGATGAGAG	Background
CID44041_CAACCAATCGTCCGTT	Background
CID44041_CACCTTGGTAATAGCA	Background
CID44041_CAGTCCTGTCACTGGC	Background
CID44041_CAGTCCTGTTCCCGAG	Background
CID44041_CCGTACTCACTTGGAT	Background
CID44041_CCTATTATCTCCAGGG	Background
CID44041_CGGGTCAGTGGACGAT	Background
CID44041_CTAGTGATCTGCTGCT	Background
CID44041_CTCGTACTCGACCAGC	Background
CID44041_CTCTGGTTCTTCATGT	Background
CID44041_CTTCTCTTCCGCATCT	Background
CID44041_GAAATGAAGTGCTGCC	Background
CID44041_GAAGCAGGTGACCAAG	Background
CID44041_GACGTTATCGACCAGC	Background
CID44041_GATCGTATCTCTTATG	Background
CID44041_GCCTCTAAGGCTCAGA	Background
CID44041_GCGCCAACAGGAATGC	Background
CID44041_GGAACTTCACAGCCCA	Background
CID44041_GGGATGAAGGTGATAT	Background
CID44041_GTACGTACAATCACAC	Background
CID44041_GTGCTTCGTCGAGTTT	Background
CID44041_TAAGTGCTCCAATGGT	Background
CID44041_TACGGGCCATGTTGAC	Background
CID44041_TCAGGTAAGTGAACAT	Background
CID44041_TGCCCATAGCGTTTAC	Background
CID44041_TGCGGGTTCCGCAAGC	Background
CID44041_TGTGTTTAGGATGTAT	Background
CID44041_TTCTTAGAGCTACCGC	Background
CID44041_TTGAACGAGACTAAGT	Background
CID44041_TTGGCAACAGCATACT	Background
CID44041_AAACCTGAGCACACAG	Background
CID44041_AAGACCTTCCGCGCAA	Background
CID44041_ACCCACTTCAACGAAA	Background
CID44041_ACGAGGAAGATGTAAC	Background
CID44041_ACTGCTCAGTAGTGCG	Background
CID44041_ATAACGCGTCTAAAGA	Background
CID44041_ATCCGAACAAGCCGCT	Background
CID44041_ATGGGAGTCGAGAACG	Background
CID44041_CACAAACTCCGAGCCA	Background
CID44041_CAGCATAAGAGCCCAA	Background
CID44041_CATCAGATCTAAGCCA	Background
CID44041_CCCTCCTTCCGTAGTA	Background
CID44041_CCTACACGTTCTGGTA	Background
CID44041_CCTACACTCACATACG	Background
CID44041_CGGACGTTCCTGTAGA	Background
CID44041_CGTCAGGAGGGTATCG	Background
CID44041_CGTTCTGAGCCACCTG	Background
CID44041_CTCACACTCAATCACG	Background
CID44041_CTCTACGGTACTTGAC	Background
CID44041_CTGCCTATCAGTCAGT	Background
CID44041_CTTAGGAGTATCTGCA	Background
CID44041_GACTACAGTCAGAATA	Background
CID44041_GATGAAAAGGGATGGG	Background
CID44041_GATGCTAAGCCGCCTA	Background
CID44041_GCTGGGTCACGGTTTA	Background
CID44041_GCTGGGTGTGCAGGTA	Background
CID44041_GGACGTCCAGACGCAA	Background
CID44041_GGTGTTAGTAGCAAAT	Background
CID44041_GTAGGCCTCGGAGGTA	Background
CID44041_GTTAAGCAGAACAATC	Background
CID44041_GTTAAGCAGACAAAGG	Background
CID44041_TAGTGGTCAGGTCCAC	Background
CID44041_TAGTGGTGTAAACACA	Background
CID44041_TATTACCCAGGGAGAG	Background
CID44041_TCAACGATCGTCACGG	Background
CID44041_TCGTAGATCAGTCCCT	Background
CID44041_TCTTTCCCAAAGTCAA	Background
CID44041_TGGCTGGCAGACGTAG	Background
CID44041_TTTCCTCAGTTAGGTA	Background
CID44041_ATCGAGTCATGACGGA	Background
CID44041_TCAGATGTCTAACGGT	Background
CID44041_ACAGCCGCAGGTCGTC	Background
CID44041_ACGAGCCCAGATAATG	Background
CID44041_ACGCCAGAGTGAACAT	High-Risk
CID44041_ACTGAACAGTGTTGAA	Background
CID44041_AGAGCGAAGCCGGTAA	Background
CID44041_AGCGGTCAGAGCAATT	Background
CID44041_AGCGGTCTCTACCAGA	Background
CID44041_CACAAACCAAAGGCGT	Background
CID44041_CACACAAAGGATATAC	Background
CID44041_CACACAATCCTTGCCA	Background
CID44041_CACAGGCGTGCAACGA	Background
CID44041_CAGTAACGTCGGCATC	Background
CID44041_CATCAGAAGGTTACCT	Background
CID44041_CCACGGATCCTTTCTC	Background
CID44041_CCCAGTTCAAGCGATG	Background
CID44041_CCTCTGATCTTGCATT	Background
CID44041_CGAACATTCGAGAACG	Background
CID44041_CGCTATCCATGCTGGC	Background
CID44041_CGTGTCTAGAGTACAT	Background
CID44041_GAGGTGAAGCGTGAAC	Background
CID44041_GCGCAACCATGCTGGC	Background
CID44041_GCGCAGTTCCAACCAA	Background
CID44041_GCGGGTTGTGCATCTA	Background
CID44041_GCTGGGTTCCCTCTTT	Background
CID44041_GGCTCGATCACAACGT	Background
CID44041_GGTGTTAAGCTAACAA	Background
CID44041_GTATCTTCATCCGCGA	Background
CID44041_GTCTTCGAGGGAGTAA	Background
CID44041_TACACGAAGTATCTCG	Background
CID44041_TAGAGCTCAGCCTGTG	Background
CID44041_TCAACGATCTAACCGA	Background
CID44041_TCCCGATGTTCGGCAC	Background
CID44041_TCGAGGCGTCTTTCAT	Background
CID44041_TGCGCAGGTCCATCCT	Background
CID44041_TGCGGGTGTCCGACGT	Background
CID44041_TGGACGCCATGCTGGC	Background
CID44041_TTATGCTTCTCGAGTA	Background
CID44041_TTTGGTTCACCACGTG	Background
CID44041_TTTGTCAAGTGTGGCA	Background
CID44041_CATGGCGTCGGCTTGG	Background
CID44041_CCTATTAAGAAGGCCT	Background
CID44041_TCAACGAGTTCGGCAC	Background
CID44041_AACGTTGTCTAAGCCA	Background
CID44041_AAGGTTCAGAAGGCCT	Background
CID44041_ACATGGTTCCTAGAAC	Background
CID44041_ACTGAGTAGTTCCACA	Background
CID44041_AGATCTGGTTTAGCTG	Background
CID44041_AGTGGGAGTTCCACTC	Background
CID44041_ATAAGAGAGTAAGTAC	Background
CID44041_ATCACGAAGACCGGAT	Background
CID44041_CAAGAAACATAAAGGT	Background
CID44041_CATCAAGAGTAAGTAC	Background
CID44041_CCGGGATAGAAACCGC	Background
CID44041_CCTATTATCATTATCC	Background
CID44041_CCTCAGTCAGCCTTTC	Background
CID44041_CGGACGTGTGAGGCTA	Background
CID44041_CTACATTGTCTGGAGA	Background
CID44041_CTGATCCTCTACTCAT	Background
CID44041_CTTAACTCAGACGCAA	Background
CID44041_GAAATGAAGCAGCGTA	Background
CID44041_GATCGTACATGCATGT	Background
CID44041_GGTGCGTGTGCACCAC	Background
CID44041_TACAGTGTCATGCTCC	Background
CID44041_TCTGAGACAAACAACA	Background
CID44041_TGCACCTTCACAGTAC	Background
CID44041_TGCGGGTTCACGCATA	Background
CID44041_TGGTTCCGTCTCTCGT	Background
CID44041_TGTGTTTGTCAAAGCG	Background
CID44041_TTATGCTAGTGTACGG	Background
CID44041_TTGGCAACATCAGTCA	Background
CID44041_ACATGGTAGACTCGGA	Background
CID44041_CCTAGCTGTCTTGCGG	Background
CID44041_CGATTGAAGGCCGAAT	Background
CID44041_TAAGAGAGTGTAACGG	Background
CID44041_TGGGCGTGTGATGTGG	Background
CID44041_ACGCCAGCACGTCAGC	Background
CID44041_GGCAATTTCCAGTAGT	Background
CID44041_AACCATGCACCAACCG	Background
CID44041_ACATACGAGCTTCGCG	Background
CID44041_AGACGTTCAGCGTTCG	Background
CID44041_CAAGATCAGCTCTCGG	Background
CID44041_CATCGGGCAGTATGCT	Background
CID44041_CCTTCCCGTTGGTGGA	Background
CID44041_CTTAGGACAGGAACGT	Background
CID44041_TCGCGAGCATCTACGA	Background
CID44041_TTATGCTCACAGGAGT	Background
CID44041_TTGCCGTAGTCATGCT	Background
CID44041_TTGTAGGCAGTCCTTC	Background
CID44041_AACTCTTAGGTGACCA	Background
CID44041_AGAGTGGTCCTCGCAT	Background
CID44041_CAACCTCAGTCCGTAT	Background
CID44041_CGGAGTCTCCAGATCA	Background
CID44041_GACGGCTGTTCATGGT	Background
CID44041_GTAACGTTCGGTTCGG	Background
CID44041_TCAACGAAGGCTAGCA	Background
CID44041_CATGGCGCAAGGTTCT	Background
CID44041_CTCTACGGTTAAGGGC	Background
CID44041_CTGTGCTGTCCTGCTT	Background
CID44041_GACGGCTGTACGAAAT	Background
CID44041_GGACAAGCAGGGCATA	Background
CID44041_GGACATTCAAGAAAGG	Background
CID44041_TGTTCCGGTGCAGGTA	Background
CID44041_CAGCTGGGTCTCTCTG	Background
CID44041_CGCTGGAGTATCACCA	Background
CID44041_GAAATGAGTGCATCTA	Background
CID44041_GCCTCTATCGCCTGTT	Background
CID44041_GCGAGAAAGGATATAC	Background
CID44041_GGGTCTGCATCACCCT	Background
CID44041_AACTCCCTCTGCCCTA	High-Risk
CID44041_AAGACCTTCCGTCATC	Background
CID44041_AAGGCAGCAGTGACAG	Background
CID44041_ACGATACTCATCTGCC	Background
CID44041_ACGGCCACATAGAAAC	Background
CID44041_ATAACGCTCTGTCTCG	Background
CID44041_ATCTGCCAGTGCGTGA	Background
CID44041_ATGGGAGAGAGGACGG	Background
CID44041_ATTGGTGCACATTTCT	Background
CID44041_CAGCCGATCTCCAGGG	Background
CID44041_CAGCTAATCTGTACGA	Background
CID44041_CAGCTGGCACCGGAAA	Background
CID44041_CATCAGACATGTCTCC	Background
CID44041_CATGACACATTTCACT	Background
CID44041_CATTCGCAGGAGTAGA	Background
CID44041_CCAATCCTCCAGGGCT	Background
CID44041_CCAGCGATCCCTTGTG	Background
CID44041_CCATTCGCAGATCGGA	Background
CID44041_CCCATACCACGAGGTA	Background
CID44041_CCGTACTAGCGATCCC	Background
CID44041_CCTACCACACTCTGTC	Background
CID44041_CGAGCCACACTTGGAT	Background
CID44041_CGCTGGACACAGAGGT	Background
CID44041_CGGACTGCAATGAAAC	Background
CID44041_CTAATGGAGGTGCTTT	Background
CID44041_CTCTACGGTCGCCATG	Background
CID44041_CTCTGGTTCCAAAGTC	Background
CID44041_CTTCTCTAGGTGATTA	Background
CID44041_GATTCAGAGACACTAA	Background
CID44041_GCAGCCATCTTCATGT	Background
CID44041_GCGCCAAGTAAGTGTA	Background
CID44041_GCGCCAAGTTGTCGCG	Background
CID44041_GCGCGATCAGGATTGG	Background
CID44041_GCTGGGTTCCGCGTTT	Background
CID44041_GCTTCCATCATAGCAC	Background
CID44041_GGACGTCGTCGCGGTT	Background
CID44041_GGCGACTGTGCGGTAA	Background
CID44041_GGCGTGTTCGCGGATC	Background
CID44041_GTAACTGTCCTAGGGC	Background
CID44041_GTCAAGTAGCTGTCTA	Background
CID44041_GTCGGGTTCACAGGCC	Background
CID44041_GTCTTCGGTCTGGTCG	Background
CID44041_TAGGCATGTCTTCTCG	Background
CID44041_TCACGAATCACATGCA	Background
CID44041_TCTGAGATCCACGACG	Background
CID44041_TCTGGAATCAACACTG	Background
CID44041_TGAGGGACAGTGACAG	Background
CID44041_TGCCAAAAGTATTGGA	Background
CID44041_TGCTGCTTCACTTATC	Background
CID44041_TTGAACGGTATATGGA	Background
CID44041_TTGCGTCTCCTCCTAG	Background
CID44041_AGCGTATCACGAGAGT	Background
CID44041_ATGAGGGTCCGCGTTT	Background
CID44041_CATGCCTAGCCGCCTA	Background
CID44041_CGCTATCGTGGTAACG	Background
CID44041_CTAGCCTTCGTTACAG	Background
CID44041_CTGATAGCACCCAGTG	Background
CID44041_TCAGCTCAGGGTCTCC	Background
CID44041_TCCCGATGTCAGAATA	Background
CID44041_TGGACGCTCCAAGCCG	Background
CID44041_TGGGCGTCAATGGATA	Background
CID44041_ACTTTCAAGGCATGTG	Background
CID44041_CACACCTGTCAACATC	Background
CID44041_CACACTCTCGCCCTTA	Background
CID44041_GACGTGCCAAGACGTG	Background
CID44041_GGGCATCAGTTAGCGG	Background
CID44041_GCAGCCAGTAGTACCT	Background
CID44041_CGTAGCGGTGTGCCTG	Background
CID44041_CTACACCCAGCTCGAC	Background
CID44041_CTTAGGATCCTTGGTC	Background
CID44041_CTCGAGGGTTTGTGTG	Background
CID44041_GCCTCTAAGTCCTCCT	Background
CID44041_GGTGTTAGTACCGTAT	Background
CID44041_ATCCGAAGTTACGTCA	Background
CID44041_CAGGTGCGTGCAACGA	Background
CID44041_CATCAGAGTGGTCCGT	Background
CID44041_GTATTCTGTAGCACGA	Background
CID44041_GTTAAGCAGAGGGCTT	Background
CID44041_TGGGAAGGTGTGGCTC	Background
CID44041_TTCTTAGTCACGATGT	Background
CID44041_GGAATAACAAGACGTG	Background
CID44041_TCAGCAAGTACCCAAT	Background
CID44041_CTTAGGAGTCGAACAG	Background
CID44041_TGTGTTTCAATCTGCA	Background
CID44041_AACCATGGTGCACGAA	Background
CID44041_CGAGCCAGTCTTCTCG	Background
CID44041_CGATGTACATGGGACA	Background
CID44041_CTGATCCTCTTAGCCC	Background
CID44041_GGGCATCAGACAAGCC	Background
CID44041_TATCAGGGTGCAGTAG	Background
CID44041_TCAACGACATCAGTAC	Background
CID44041_TCTGAGAGTTCCAACA	Background
CID44041_TGGCGCACACCATGTA	Background
CID44041_GGATGTTGTTCTGGTA	Background
CID44041_TCGGTAAAGCTGATAA	Background
CID44041_AACTTTCGTCAGCTAT	Background
CID44041_ACACTGACACCAGCAC	Background
CID44041_CGTCAGGCACATTCGA	Background
CID44041_AACGTTGCATCATCCC	Background
CID44041_CTAGCCTCACGCTTTC	Background
CID44041_TTAGGACCACCAACCG	Background
CID44041_AACACGTGTAAGAGGA	Background
CID44041_AACGTTGGTAGAGTGC	Background
CID44041_ACACCGGGTTTAGCTG	Background
CID44041_ACGATACAGTGATCGG	Background
CID44041_ACTGCTCCAGGTCGTC	Background
CID44041_ACTTGTTTCGTAGATC	Background
CID44041_AGGCCGTGTCATGCCG	Background
CID44041_AGTGGGAGTCACTTCC	Background
CID44041_ATCACGAGTTACCGAT	Background
CID44041_ATTATCCAGATCTGAA	Background
CID44041_CCACGGACAATGCCAT	Background
CID44041_CCCAATCTCATGTCTT	Background
CID44041_CCGTGGAAGGCGACAT	Background
CID44041_CCTACACTCAACACTG	Background
CID44041_CCTTACGAGGGTGTTG	Background
CID44041_CGAGAAGTCTCGTTTA	Background
CID44041_CGATCGGAGTACGCCC	Background
CID44041_CGCGGTACATTTGCCC	Background
CID44041_CTAATGGTCCAGTAGT	Background
CID44041_CTAGAGTCACTGCCAG	Background
CID44041_CTCATTACAGGGAGAG	Background
CID44041_CTCTGGTGTCTCCATC	Background
CID44041_GAAATGAGTTGCGTTA	Background
CID44041_GACGTGCAGTGTACTC	Background
CID44041_GATGAGGGTAGCAAAT	Background
CID44041_GATTCAGCAGCATGAG	Background
CID44041_GCAAACTAGGCGATAC	Background
CID44041_GCACTCTAGTCAATAG	Background
CID44041_GCATGATTCGTCCGTT	Background
CID44041_GGAAAGCAGGAGCGTT	Background
CID44041_GGCTCGAAGAAACGCC	Background
CID44041_GTAACGTGTTTAAGCC	Background
CID44041_GTAGGCCAGCGCCTCA	Background
CID44041_GTAGGCCGTAAGTGGC	Background
CID44041_GTATCTTGTCTCGTTC	Background
CID44041_GTCGTAACAACCGCCA	Background
CID44041_TACTTGTTCTGGCGAC	Background
CID44041_TCAATCTGTGAGTGAC	Background
CID44041_TCAGATGAGTAGCGGT	Background
CID44041_TCAGCAACAGGAACGT	Background
CID44041_TCATTTGTCAACTCTT	Background
CID44041_TCTGGAACAAACTGTC	Background
CID44041_TCTGGAACATGTTGAC	Background
CID44041_TGAAAGAAGAATGTTG	Background
CID44041_TGCTACCTCTCCGGTT	Background
CID44041_TGGCTGGTCGAGAACG	Background
CID44041_TGTCCCAAGGAATCGC	Background
CID44041_TTAGGCATCGCGTTTC	Background
CID44041_TTGCGTCGTCTCCATC	Background
CID44041_AATCCAGCACTGTCGG	Background
CID44041_ACATACGGTCTCCACT	Background
CID44041_ACTTACTTCTTAGAGC	Background
CID44041_CACACCTAGGCTCAGA	Background
CID44041_CTACGTCGTCTTGCGG	Background
CID44041_CGGTTAACAATGTTGC	Background
CID44041_GTCTCGTCAGCCAGAA	Background
CID44041_TCCCGATAGTACTTGC	Background
CID44041_ACGAGCCTCTCTTATG	Background
CID44041_CGGTTAAGTCTTTCAT	Background
CID44041_GCGCGATGTATGGTTC	Background
CID44041_TCAGGTAAGCTTATCG	Background
CID44041_CGTTAGAGTTCGAATC	Background
CID44041_AACTCTTAGCATGGCA	Background
CID44041_CGGACTGAGATCGGGT	Background
CID44041_GAGTCCGGTCTTGTCC	Background
CID44041_TCGGGACTCCAAAGTC	Background
CID44041_TTTACTGAGAATGTTG	Background
CID44041_CCCTCCTGTCTAGCGC	Background
CID44041_GACCTGGGTAGAGTGC	Background
CID44041_AAGGTTCTCACAGGCC	Background
CID44041_CATTCGCTCTTGAGAC	Background
CID44041_CTACACCGTAGGGTAC	Background
CID44041_TACCTATTCCTAGTGA	Background
CID44041_GACACGCAGTCCATAC	Background
CID44041_ATCCGAAGTCGCTTTC	Background
CID44041_GACAGAGCAAGACACG	Background
CID44041_AACTCCCTCCGTCAAA	Background
CID44041_AAGGAGCGTCAGAGGT	Background
CID44041_AAGGAGCTCTAAGCCA	Background
CID44041_AAGGTTCAGGGTTTCT	Background
CID44041_AATCGGTAGCCGTCGT	Background
CID44041_ACATACGAGACTTGAA	Background
CID44041_ACCCACTCACGAAGCA	Background
CID44041_ACTTACTCATAGACTC	Background
CID44041_ACTTTCATCCATGCTC	Background
CID44041_AGGTCATCATGGAATA	Background
CID44041_AGGTCCGTCGGAGGTA	Background
CID44041_ATAAGAGCAACACGCC	Background
CID44041_CAGCAGCAGCGCTTAT	Background
CID44041_CAGCCGAAGTGCCATT	Background
CID44041_CAGCCGAGTATGCTTG	Background
CID44041_CATATTCCATCACAAC	Background
CID44041_CCAATCCAGCCGCCTA	Background
CID44041_CCACGGATCTGTTGAG	Background
CID44041_CCCTCCTTCTTACCGC	High-Risk
CID44041_CCGGTAGGTAGCTGCC	Background
CID44041_CCTACACCACGGCCAT	Background
CID44041_CCTCTGAGTCTCTTTA	Background
CID44041_CCTTCGAGTATAGGTA	Background
CID44041_CGAACATCAAGCCATT	Background
CID44041_CGAACATGTTATTCTC	Background
CID44041_CGACCTTTCAGCGACC	Background
CID44041_CGAGAAGAGCTAGTCT	Background
CID44041_CGATGGCTCCCTTGCA	Background
CID44041_CGATGTAGTACCGGCT	Background
CID44041_CGCGTTTTCCTCGCAT	Background
CID44041_CGCTGGAGTCGGCTCA	Background
CID44041_CGGAGTCAGCCCAGCT	Background
CID44041_CGTAGCGAGGACAGAA	Background
CID44041_CGTAGGCAGAAGGTGA	Background
CID44041_CGTCTACCATATGGTC	Background
CID44041_CTAACTTAGTGTACCT	Background
CID44041_CTAATGGAGATCCTGT	Background
CID44041_CTCGGAGCAGATCTGT	Background
CID44041_CTCGGAGCATAAGACA	High-Risk
CID44041_CTCTAATAGTACTTGC	High-Risk
CID44041_CTGATCCAGAATCTCC	High-Risk
CID44041_CTGGTCTGTATAGGGC	Background
CID44041_CTGTGCTCAGATTGCT	Background
CID44041_CTTAGGAAGTGAACGC	Background
CID44041_GAACATCGTCGCATAT	Background
CID44041_GAAGCAGCATCCGTGG	Background
CID44041_GACGCGTAGATGGCGT	Background
CID44041_GAGTCCGCATGCATGT	Background
CID44041_GATGCTATCATAACCG	Background
CID44041_GCAAACTAGTGCCATT	Background
CID44041_GCAGCCAGTCGCTTCT	Background
CID44041_GCATGTAGTATTAGCC	Background
CID44041_GCCAAATAGCCGCCTA	Background
CID44041_GCGCAGTAGAAGGACA	Background
CID44041_GCTGCAGTCATCTGCC	High-Risk
CID44041_GCTGCAGTCTGCGTAA	Background
CID44041_GCTGCTTTCCCGACTT	Background
CID44041_GGACGTCCATTCACTT	Background
CID44041_GGTGTTAGTAGGAGTC	Background
CID44041_GTAACTGAGCACGCCT	Background
CID44041_GTACGTACATGCCTTC	Background
CID44041_GTGTGCGAGTGTGGCA	Background
CID44041_TAAACCGCAAGTTGTC	Background
CID44041_TAAGCGTTCCGAGCCA	High-Risk
CID44041_TACAGTGCATCCTTGC	Background
CID44041_TACCTTAGTCTGATTG	Background
CID44041_TAGCCGGTCTGAGTGT	Background
CID44041_TCAGCTCGTTGTTTGG	Background
CID44041_TCTGAGAAGGCAGTCA	Background
CID44041_TGAGCATTCATGTGGT	Background
CID44041_TGCCAAAGTCATCCCT	Background
CID44041_TGCCCTAGTCGAAAGC	Background
CID44041_TGCGTGGCAAACAACA	Background
CID44041_TGGGCGTGTAAGTTCC	Background
CID44041_TGGTTCCAGAAGGGTA	Background
CID44041_TTAACTCTCGCCCTTA	High-Risk
CID44041_TTAGGCATCACTATTC	Background
CID44041_TTGCGTCAGGCAGGTT	Background
CID44041_TGAAAGATCGTTACGA	Background
CID44041_AAAGATGGTCTCACCT	Background
CID44041_AAAGTAGTCGGCGGTT	Background
CID44041_AACACGTAGGAACTGC	Background
CID44041_AACTTTCCAGGGTTAG	Background
CID44041_ACCCACTAGACGCTTT	Background
CID44041_ACCGTAATCCTTAATC	Background
CID44041_ACTGAACGTCTCGTTC	Background
CID44041_AGCAGCCTCTGATACG	Background
CID44041_AGCATACTCACCCGAG	Background
CID44041_AGTCTTTAGATGCCTT	Background
CID44041_ATAGACCCAATACGCT	Background
CID44041_ATCTGCCCACAGGTTT	Background
CID44041_ATGAGGGGTTCTCATT	Background
CID44041_ATGGGAGTCCGTTGTC	Background
CID44041_ATTGGTGCAGGGTTAG	Background
CID44041_CACATAGGTCTCCATC	Background
CID44041_CACCACTGTCCGAGTC	Background
CID44041_CAGCAGCGTTGCTCCT	Background
CID44041_CAGCTAAGTAAGAGAG	Background
CID44041_CATCAAGGTAGAAGGA	Background
CID44041_CATCAGACAAACTGTC	Background
CID44041_CCAGCGAAGCCAGGAT	Background
CID44041_CCAGCGACACAGGTTT	Background
CID44041_CCCAATCAGCGATCCC	Background
CID44041_CCTACACGTGAGGCTA	Background
CID44041_CCTCTGAAGCGTGAAC	Background
CID44041_CCTTCCCGTGTTCTTT	Background
CID44041_CGAGCACAGGACATTA	Background
CID44041_CGGACACGTCTCACCT	Background
CID44041_CTACACCAGAGAACAG	Background
CID44041_CTCGAAAGTTACTGAC	Background
CID44041_CTCGAAATCACAATGC	Background
CID44041_CTCGGGACATACCATG	Background
CID44041_CTGATAGCACACATGT	Background
CID44041_GAAGCAGTCTGGAGCC	Background
CID44041_GACAGAGTCCTAGGGC	Background
CID44041_GACGGCTCATCAGTCA	Background
CID44041_GCATACAAGCGTTTAC	Background
CID44041_GCATACAAGCTGCGAA	Background
CID44041_GCGCAGTGTTGTACAC	Background
CID44041_GGACATTTCCGAACGC	Background
CID44041_GGCTCGACACTTCGAA	Background
CID44041_GGTGTTAAGGACATTA	Background
CID44041_GTCGGGTTCGTCGTTC	Background
CID44041_GTCTTCGCATTTCACT	Background
CID44041_GTGCGGTTCGCATGAT	Background
CID44041_GTGGGTCGTAGGGTAC	Background
CID44041_GTTCATTAGATGGGTC	Background
CID44041_TACCTATTCGAGAGCA	Background
CID44041_TATCAGGGTATCGCAT	Background
CID44041_TATGCCCTCGCTGATA	Background
CID44041_TCTCTAATCCAAAGTC	Background
CID44041_TGACGGCTCTGCCAGG	Background
CID44041_TGACTAGGTTGGGACA	Background
CID44041_TGCCAAAGTGTTTGGT	Background
CID44041_TGCGTGGGTTTGTTTC	Background
CID44041_TGCTACCCATTATCTC	Background
CID44041_TTAACTCGTACTTAGC	Background
CID44041_TTAGGACGTCCGAAGA	Background
CID44041_TTGAACGAGATTACCC	High-Risk
CID44041_CCTTACGGTTACGCGC	Background
CID44041_GCGAGAATCAGTCCCT	Background
CID44041_GGTGCGTTCGTCGTTC	Background
CID44041_TTCGAAGAGACAATAC	Background
CID44041_AAAGATGCATCAGTAC	Background
CID44041_AAGGAGCCACCAGTTA	Background
CID44041_ACACCAAAGGTACTCT	Background
CID44041_ACACCAACAAGTCATC	Background
CID44041_ACCAGTAAGTTAGGTA	Background
CID44041_ACGCCAGCATATGAGA	Background
CID44041_ACGCCGACATGCCACG	Background
CID44041_ACTTGTTCAAACTGCT	Background
CID44041_AGAATAGTCTGCAGTA	Background
CID44041_AGGCCACCACCTCGTT	Background
CID44041_AGGGTGAGTGCACCAC	Background
CID44041_ATCACGAGTACTTAGC	Background
CID44041_ATGTGTGGTAATCACC	Background
CID44041_CAACCTCGTGTCGCTG	Background
CID44041_CAACTAGCAAGACACG	Background
CID44041_CAAGGCCCAGAGTGTG	Background
CID44041_CACAAACCAGATGGGT	Background
CID44041_CATGGCGCAGCATACT	Background
CID44041_CCCAATCCATGAACCT	Background
CID44041_CGATGTATCGTGGGAA	Background
CID44041_CGTTCTGCAGCCAGAA	Background
CID44041_CTACGTCTCAGGCAAG	Background
CID44041_CTCTACGTCACCCTCA	Background
CID44041_GGGACCTAGCATCATC	Background
CID44041_GGTGCGTTCCTAGTGA	Background
CID44041_GTAACGTCATCTACGA	Background
CID44041_TAGACCATCCAAATGC	Background
CID44041_TATCTCATCAGTGTTG	Background
CID44041_TCAACGAGTAGCGCTC	Background
CID44041_TCAACGATCGCAGGCT	Background
CID44041_TCGGTAAGTCTGGTCG	Background
CID44041_TCTCATAAGCACAGGT	Background
CID44041_TGACTTTAGCCAGGAT	Background
CID44041_TGCGGGTTCCAACCAA	Background
CID44041_CTCACACGTTAGAACA	Background
CID44041_CTGGTCTAGCCAGAAC	Background
CID44041_TTAGTTCCAAGTCATC	Background
CID44041_TTTACTGCACAAGCCC	Background
CID44041_CCAGCGAAGAGAGCTC	Background
CID44041_GAACATCGTAAGGATT	Background
CID44041_GAGGTGAAGCAGCGTA	Background
CID44041_GCTGCAGTCCAGAAGG	Background
CID44041_TACCTATGTTGGTAAA	Background
CID44041_AGCGGTCCAGACGCCT	Background
CID44041_CTTAACTAGTGTCTCA	Background
CID44041_GCGACCATCAACACGT	Background
CID44041_GGAACTTTCGAGGTAG	Background
CID44041_TGACTAGGTGCTAGCC	Background
CID44041_TGGCCAGTCGGATGGA	Background
CID44041_CGGACGTAGTCAAGCG	Background
CID44041_TGCCCATGTAGAGCTG	Background
CID44041_ATAGACCCATGGATGG	Background
CID44041_ACGGGTCGTTGGTTTG	High-Risk
CID44041_AGTTGGTGTGGGTATG	Background
CID44041_ATCATGGTCGGAATCT	Background
CID44041_CATTCGCAGCCAGAAC	Background
CID44041_CTAGTGATCTCTAGGA	Background
CID44041_TCAACGATCAACTCTT	Background
CID44041_TCAGCAAAGACACTAA	Background
CID44041_TGACGGCCACCACCAG	Background
CID44041_GACGTGCCATCACGAT	Background
CID44041_TCTCTAACACGTCAGC	Background
CID44041_CAGATCACACAAGACG	Background
CID44041_GCGACCATCGCTAGCG	Background
CID44041_AAAGATGTCCCAAGAT	Background
CID44041_AACTCCCCAATCAGAA	Background
CID44041_AATCGGTCATGCCTAA	Background
CID44041_ACATACGAGGGTTTCT	Background
CID44041_ACGATGTTCGTCTGAA	Background
CID44041_ACGCCAGAGAGTTGGC	Background
CID44041_ACGGAGACAAGGTGTG	High-Risk
CID44041_AGAGCGAAGATGGCGT	Background
CID44041_AGATCTGTCATCATTC	Background
CID44041_AGCTTGAAGGCTAGGT	Background
CID44041_AGGGATGCAGTACACT	Background
CID44041_AGGGATGGTAGCTCCG	Background
CID44041_AGGGATGGTCCGTCAG	Background
CID44041_AGGGTGAAGGGTGTGT	Background
CID44041_AGTCTTTGTAGTAGTA	Background
CID44041_AGTCTTTTCTTATCTG	Background
CID44041_AGTGAGGAGCGATGAC	Background
CID44041_AGTGTCATCAGCAACT	Background
CID44041_AGTTGGTTCGTTACGA	Background
CID44041_ATCATCTCAGACGTAG	Background
CID44041_ATCATCTGTGTTGAGG	Background
CID44041_ATCGAGTAGATGGCGT	Background
CID44041_ATGGGAGCACGAAATA	Background
CID44041_ATGTGTGGTTCACCTC	Background
CID44041_ATTACTCAGTTGTCGT	Background
CID44041_ATTGGACGTTATCGGT	Background
CID44041_ATTGGACTCGACAGCC	Background
CID44041_ATTGGTGAGAGACTAT	Background
CID44041_CAACCAACAGTAAGAT	Background
CID44041_CAACCAAGTACAGCAG	Background
CID44041_CACACCTAGAGAACAG	Background
CID44041_CACAGTAAGTAGGTGC	Background
CID44041_CACCACTAGATCGATA	Background
CID44041_CACCAGGTCTGGGCCA	Background
CID44041_CACTCCAAGTATTGGA	Background
CID44041_CATATGGCAGATCTGT	Background
CID44041_CCACGGAAGATGCCTT	Background
CID44041_CCGGGATAGAAGGACA	Background
CID44041_CCGGTAGGTTAAGTAG	Background
CID44041_CCTACCAAGTGGACGT	Background
CID44041_CCTTTCTAGCTGCAAG	Background
CID44041_CGACTTCCATTTCACT	Background
CID44041_CGCCAAGCACCACGTG	Background
CID44041_CGCTGGAGTGAGGGAG	Background
CID44041_CGCTGGATCGGAAACG	Background
CID44041_CGGAGCTCACGGTAGA	Background
CID44041_CGGAGTCCACCAACCG	Background
CID44041_CGGAGTCCAGCCTATA	Background
CID44041_CGTCTACCAGGACGTA	Background
CID44041_CGTGAGCAGGTGTGGT	Background
CID44041_CGTTCTGTCTTACCTA	Background
CID44041_CTAAGACCATGCCCGA	Background
CID44041_CTACACCCAAGCTGGA	Background
CID44041_CTGAAACGTGGTGTAG	Background
CID44041_CTTAGGAGTCTTGCGG	Background
CID44041_CTTGGCTTCAGAGGTG	Background
CID44041_CTTTGCGAGTGTACTC	Background
CID44041_GAACGGAGTCCGTCAG	High-Risk
CID44041_GAATAAGGTCTACCTC	Background
CID44041_GACAGAGGTCGTTGTA	Background
CID44041_GACTAACGTAAGAGAG	Background
CID44041_GACTAACGTGGCAAAC	Background
CID44041_GACTAACTCCGATATG	Background
CID44041_GACTACAAGCTTTGGT	Background
CID44041_GAGGTGAGTATAGTAG	Background
CID44041_GAGTCCGAGTGTACGG	Background
CID44041_GATCGCGTCACATGCA	Background
CID44041_GCATGTAAGCATCATC	Background
CID44041_GCCAAATAGCGCTCCA	Background
CID44041_GCGACCAGTGTTGGGA	Background
CID44041_GCGCAGTCAGTCTTCC	Background
CID44041_GCGCGATCATCTATGG	Background
CID44041_GCGGGTTTCCAGAAGG	Background
CID44041_GCTGCAGTCGGCGCAT	Background
CID44041_GCTGCGATCGGCGCTA	Background
CID44041_GCTTGAAAGATGTTAG	Background
CID44041_GGAGCAAAGCACAGGT	Background
CID44041_GGATGTTTCCGTCATC	Background
CID44041_GGCGACTTCGCCTGAG	Background
CID44041_GGCTGGTAGATCCCAT	Background
CID44041_GGGCACTCATCGGACC	Background
CID44041_GTATCTTCAAGCCCAC	Background
CID44041_GTCTTCGTCACCCTCA	Background
CID44041_GTGCATAAGCTAAGAT	Background
CID44041_GTTAAGCTCGCCGTGA	Background
CID44041_TACAGTGGTACCGGCT	Background
CID44041_TACTCGCGTTCAGACT	Background
CID44041_TATCAGGAGCTGAAAT	Background
CID44041_TATCAGGCATCTCGCT	Background
CID44041_TATGCCCAGAGCTGCA	Background
CID44041_TCAGCAAGTCGCGAAA	Background
CID44041_TCGTACCCATCGATTG	Background
CID44041_TCTTCGGGTGAACCTT	Background
CID44041_TGAGCCGTCGGCCGAT	Background
CID44041_TGCCCATCATCTCGCT	Background
CID44041_TGCGTGGTCCGTACAA	Background
CID44041_TGGCCAGTCACCGTAA	Background
CID44041_TGGGCGTAGCGTGTCC	Background
CID44041_TGTTCCGAGGGAGTAA	Background
CID44041_TTAGGCAAGACTTGAA	Background
CID44041_TTGAACGCACCCATGG	Background
CID44041_TTGTAGGGTCCAAGTT	Background
CID44041_CGGCTAGGTTAAGTAG	Background
CID44041_GTACTTTGTCTTTCAT	Background
CID44041_CAGCGACTCAGGCGAA	Background
CID44041_CCCAATCGTCTCATCC	Background
CID44041_CTGGTCTTCCGTTGCT	Background
CID44041_GCATGATGTGTTGAGG	Background
CID44041_GCGAGAAGTCCCTACT	Background
CID44041_GGAAAGCTCTGCGACG	Background
CID44041_ACATCAGTCACAGTAC	Background
CID44041_TTCTCCTCATTGGTAC	Background
CID44041_AGATTGCCAAAGTGCG	Background
CID44041_GTAACGTAGGGATACC	Background
CID44041_AACTCAGAGAAACGAG	Background
CID44041_AGATTGCGTACCGTTA	Background
CID44041_AGTAGTCCATGCCTAA	Background
CID44041_ATCATCTTCAAACCGT	Background
CID44041_ATCATGGGTTCCTCCA	Background
CID44041_CAGCAGCAGGACCACA	Background
CID44041_CCTACCAAGAGGTTAT	Background
CID44041_CGTTAGATCAGCTGGC	Background
CID44041_CGTTAGATCTATCGCC	Background
CID44041_GGTGTTATCCACGACG	Background
CID44041_GTATCTTTCGCAAGCC	Background
CID44041_TACTCATGTATATGAG	Background
CID44041_TATGCCCCACGGTGTC	High-Risk
CID44041_TGCCCTATCTGATACG	Background
CID44041_TTTATGCGTTCTCATT	Background
CID44041_CAAGAAAAGTAAGTAC	High-Risk
CID44041_CGTCAGGGTCGCTTTC	High-Risk
CID44041_GACACGCGTAAGTAGT	Background
CID44041_GACGCGTAGGTGATTA	Background
CID44041_GCACATAGTAAGAGAG	Background
CID44041_TACGGTAAGACAGACC	Background
CID44041_TAGTGGTGTTCCACAA	Background
CID44041_ACCCACTAGAGTCGGT	Background
CID44041_CTTCTCTCATGTTGAC	Background
CID44041_GACCTGGGTCAAAGCG	Background
CID44041_GTGGGTCTCACTGGGC	Background
CID44041_TAAGAGACATGAACCT	Background
CID44041_TCGTACCTCTTGCATT	Background
CID44041_TGGTTCCGTCTCATCC	Background
CID44041_CACCAGGTCACTTACT	Background
CID44041_CTGCTGTCATTTCACT	Background
CID44041_AACCGCGAGCGATAGC	Background
CID44041_TCGCGTTGTCCCGACA	Background
CID44041_AGTTGGTTCGTGTAGT	Background
CID44041_ACACCGGGTCTGCAAT	Background
CID44041_ACGCCGACACACTGCG	Background
CID44041_CAGAGAGAGAAGCCCA	Background
CID44041_CATGACAAGGGAACGG	Background
CID44041_GGATGTTGTTCGCGAC	Background
CID44041_GGCTGGTCAGGGTACA	Background
CID44041_TACACGAAGCTGATAA	Background
CID44041_CACAGGCAGATGCCAG	Background
CID44041_AAACGGGAGGTACTCT	Background
CID44041_AACCGCGGTGCACGAA	Background
CID44041_AACTCTTCACAGAGGT	Background
CID44041_AACTGGTAGTGTACTC	Background
CID44041_AAGACCTTCGGTCTAA	Background
CID44041_AAGCCGCTCCTAGAAC	Background
CID44041_ACAGCCGCAGATCCAT	Background
CID44041_ACATGGTTCTGCAGTA	Background
CID44041_ACGTCAAAGGCAATTA	Background
CID44041_ACTGAACGTACCCAAT	Background
CID44041_ACTTGTTGTGACGCCT	Background
CID44041_AGGGATGCAACCGCCA	Background
CID44041_ATAAGAGAGTTCGATC	Background
CID44041_ATCATCTCAATCACAC	Background
CID44041_ATCTACTAGGATATAC	Background
CID44041_ATGAGGGTCTTAGCCC	Background
CID44041_CACAGGCAGACTAAGT	Background
CID44041_CAGCATAAGGTGTGGT	Background
CID44041_CAGCATAGTTGATTGC	Background
CID44041_CATCAGAGTCAGATAA	Background
CID44041_CATTATCGTAAGCACG	Background
CID44041_CCCAGTTAGGTGCTTT	Background
CID44041_CCTCTGATCCAAGTAC	Background
CID44041_CGGACTGAGTATCTCG	Background
CID44041_CGTAGGCGTCAAGCGA	Background
CID44041_CTAACTTTCAGTGTTG	Background
CID44041_CTCGGGAGTCCGACGT	Background
CID44041_CTGTGCTGTCAGGACA	Background
CID44041_GATCGATCAAGACGTG	Background
CID44041_GCCTCTAGTTGTTTGG	Background
CID44041_GCTCTGTTCTAACCGA	Background
CID44041_GCTGCAGAGAAACGAG	Background
CID44041_GGAAAGCAGCCGGTAA	Background
CID44041_GGACATTCATGAGCGA	Background
CID44041_GGACATTTCGCGCCAA	Background
CID44041_GGAGCAACAACGATCT	Background
CID44041_GGGCACTCATATACGC	Background
CID44041_GGGTTGCGTATCAGTC	Background
CID44041_GTAACGTGTTGTGGAG	Background
CID44041_GTGCGGTCATGGTAGG	Background
CID44041_GTGCGGTGTTCCACAA	Background
CID44041_TATGCCCGTGCACCAC	Background
CID44041_TCAGCAAGTAAACACA	Background
CID44041_TCGGGACTCTGTTTGT	Background
CID44041_TGAGAGGAGTGAAGAG	Background
CID44041_TTGGAACAGGCGATAC	Background
CID44041_CTAGCCTAGACAGGCT	Background
CID44041_GCTTGAAAGCGCTCCA	Background
CID44041_TTGAACGCAATGAAAC	Background
CID44041_ACACCCTCACATAACC	Background
CID44041_ACATGGTGTCGCATCG	Background
CID44041_CAAGATCAGCGTGTCC	Background
CID44041_CGTGTCTGTCTTCAAG	Background
CID44041_CTTCTCTGTGTTTGGT	Background
CID44041_GAGGTGAAGTTCGATC	Background
CID44041_GATGAGGGTGTTGGGA	Background
CID44041_GCTTCCACAGTTAACC	Background
CID44041_GTGCATACAAAGAATC	Background
CID44041_TCACGAAGTCGGCACT	Background
CID44041_TGGGCGTTCGTCTGCT	Background
CID44041_TGACGGCTCTTTCCTC	Background
CID44041_GGTGCGTGTATCGCAT	Background
CID44041_AGGGATGTCACGCATA	Background
CID44041_AGTAGTCAGGCTCATT	Background
CID44041_ATAACGCTCATCGCTC	Background
CID44041_CAACCAAAGAGTCGGT	Background
CID44041_CACAAACCACGTCTCT	Background
CID44041_CGTGTAAGTATAAACG	Background
CID44041_CTCGGGAGTTAAAGTG	Background
CID44041_CTGATCCTCCACGTGG	Background
CID44041_GACGGCTCAAGAAGAG	Background
CID44041_GCGCGATTCCGCGGTA	Background
CID44041_GGTATTGGTCCGAGTC	Background
CID44041_GTAACTGCAAACGCGA	Background
CID44041_GTACTCCAGGCGACAT	Background
CID44041_TACACGATCGGCGCAT	Background
CID44041_TACCTTAAGGCGTACA	Background
CID44041_TCACGAAAGGCCCGTT	Background
CID44041_TCTGAGATCGTCTGCT	High-Risk
CID44041_TGCACCTTCAGCAACT	Background
CID44041_TGCCCATCATCTCCCA	Background
CID44041_GACTGCGTCAGGCAAG	Background
CID44041_CATCAAGAGTCACGCC	Background
CID44041_CATCAGACAGTAACGG	Background
CID44041_CGAGCCACACAGGAGT	Background
CID44041_GAACGGAGTCCGAGTC	Background
CID44041_AAAGCAAAGGACGAAA	Background
CID44041_AACTTTCTCCTCTAGC	Background
CID44041_AGGGAGTAGCCCAACC	Background
CID44041_CGTGAGCGTCTGATTG	Background
CID44041_GGCTGGTTCCGCGCAA	Background
CID44041_CGTAGCGAGACCTAGG	Background
CID44041_CTGTTTATCTTTACGT	Background
CID44041_GCTTGAAGTCATGCCG	Background
CID44041_TCGGGACAGACAGAGA	High-Risk
CID44041_TCTCATAGTCATGCCG	High-Risk
CID44041_TGCCCTATCAGTTAGC	High-Risk
CID44041_CGCTATCTCACAGGCC	Background
CID44041_AGCAGCCAGCTCCTTC	Background
CID44041_AGGCCACGTCCAGTTA	High-Risk
CID44041_AGGGTGAGTTTACTCT	High-Risk
CID44041_AGTCTTTCATACCATG	High-Risk
CID44041_ATCTACTGTACTTGAC	Background
CID44041_ATCTGCCCAGCATGAG	High-Risk
CID44041_ATCTGCCTCCAAACAC	Background
CID44041_CAGCTGGTCAATAAGG	Background
CID44041_CCACGGAAGACCTTTG	Background
CID44041_CCTCAGTGTAGCTCCG	High-Risk
CID44041_CCTTCCCTCTACTCAT	Background
CID44041_CGAGCACGTCCATGAT	Background
CID44041_CGCTATCTCGAACGGA	High-Risk
CID44041_CGGCTAGAGTATCGAA	Background
CID44041_CGTTAGACAATGAAAC	High-Risk
CID44041_CTGCGGAGTTCGTGAT	High-Risk
CID44041_GAACCTACATGCTAGT	Background
CID44041_GATCGATTCTGACCTC	Background
CID44041_GCGAGAAGTCCGCTGA	Background
CID44041_GGCGACTCAACACCCG	Background
CID44041_GGGTTGCAGATGGCGT	Background
CID44041_TACTTGTAGTCGTACT	High-Risk
CID44041_TGCGCAGCAGCTGCTG	High-Risk
CID44041_TTAGGACCAAGCTGTT	High-Risk
CID44041_TTGCCGTTCAGCGACC	High-Risk
CID44041_TTGTAGGGTTGTCTTT	High-Risk
CID44041_TTTGTCACATCCTTGC	High-Risk
CID44041_ACATGGTTCATGCTCC	Background
CID44041_ACGCAGCTCGCCAAAT	Background
CID44041_CACCACTCACCTGGTG	Background
CID44041_CTTAGGATCTAACTTC	Background
CID44041_GCAGTTAAGGTGTTAA	High-Risk
CID44041_GTATTCTGTACACCGC	Background
CID44041_GTTCTCGCAATCGAAA	Background
CID44041_TATCTCAGTCCGAATT	Background
CID44041_CCCATACAGAAGGACA	High-Risk
CID44041_AGGGTGAGTAACGACG	High-Risk
CID44041_CTTGGCTCAATAGCAA	High-Risk
CID44041_GCAAACTAGTGAACAT	High-Risk
CID44041_TCAGGATAGACCACGA	High-Risk
CID44041_TCGGTAATCCACTGGG	Background
CID44041_CCGGTAGGTCAGAAGC	High-Risk
CID44041_GACTGCGTCATGTCTT	Background
CID44041_CACACAATCTGCCCTA	Background
CID44041_GGACAGAAGTCATCCA	Background
CID44041_AATCGGTGTAGTAGTA	Background
CID44041_ACTTACTCACCGGAAA	Background
CID44041_CACTCCATCCGAATGT	Background
CID44041_GTAGGCCTCTCATTCA	Background
CID44041_GTATCTTGTCTAGAGG	High-Risk
CID44041_ATCCGAAAGAAACGAG	Background
CID44041_CAGAATCAGGCGTACA	Background
CID44041_CCCTCCTGTCGACTGC	Background
CID44041_CGTTAGACACTTGGAT	Background
CID44041_CTAGTGACACTCTGTC	Background
CID44041_CTGATAGGTGTAATGA	Background
CID44041_GGGAATGGTAGAAGGA	Background
CID44041_GGGAATGTCTCTTATG	High-Risk
CID44041_GGGATGAGTGCCTTGG	Background
CID44041_TCAGGTACAGCTTCGG	High-Risk
CID44041_TGACAACAGAAGCCCA	Background
CID44041_ACCAGTACAAGCTGGA	Background
CID44041_CCTAAAGTCGGTGTTA	Background
CID44041_CTTCTCTTCTTGCCGT	High-Risk
CID44041_GAATAAGGTTAAAGTG	Background
CID44041_TGACTTTAGCACAGGT	High-Risk
CID44041_TTGCCGTTCGCGATCG	Background
CID44041_GCTGCGAAGCGTGAGT	Background
CID44041_TCACGAATCATTGCCC	High-Risk
CID44041_CACACTCAGATCCCAT	High-Risk
CID44041_CGATTGAAGCGAAGGG	High-Risk
CID44041_GTATTCTCAAAGGTGC	Background
CID44041_TACTTACGTATCAGTC	Background
CID44041_TCAGGATTCACATAGC	Background
CID44041_TCATTTGTCAAACAAG	Background
CID44041_TGATTTCAGAGACTTA	Background
CID44041_AGGGTGATCACGCATA	Background
CID44041_CCTATTACATGGTAGG	High-Risk
CID44041_GAAATGAAGCGATAGC	Background
CID44041_TTTATGCAGGCCATAG	Background
CID44041_ATCCACCCACAGATTC	Background
CID44041_CAGCGACAGCCACGTC	Background
CID44041_TCTTCGGCAGCGTAAG	High-Risk
CID44041_CATATGGCACGAAAGC	Background
CID44041_CCACGGACAGCTTAAC	High-Risk
CID44041_CTAGTGAAGAGGTAGA	Background
CID44041_GTAGTCAGTATATGAG	High-Risk
CID44041_GTTAAGCGTGTCAATC	Background
CID44041_TACGGTAAGTCATGCT	Background
CID44041_TTTCCTCGTACGACCC	High-Risk
CID44041_CATGACACATTGAGCT	Background
CID44041_TGGTTCCAGACCACGA	Background
CID44041_TTGACTTGTCTCATCC	Background
CID44041_CTGAAACGTGTGCGTC	Background
CID44041_TGCCCTATCGGCTACG	High-Risk
CID44041_ACTTTCACAGAGTGTG	Background
CID44041_AGTGGGATCTCTAAGG	Background
CID44041_GTGGGTCGTAAACACA	Background
CID44041_TTCTCCTGTTTCCACC	Background
CID44041_AAACGGGTCTTTACAC	High-Risk
CID44041_AGAGTGGAGGGAGTAA	High-Risk
CID44041_CATGCCTTCGGAAATA	High-Risk
CID44041_CCGGGATCAGGAATCG	Background
CID44041_CTTAGGAAGAAACCAT	High-Risk
CID44041_GTCAAGTGTGTTGGGA	Background
CID44041_TCTTTCCCAAGTCTGT	High-Risk
CID44041_TGCTACCCACGGATAG	Background
CID44041_TTGGCAAAGATATGCA	Background
CID44041_AAAGATGGTCGCATCG	Background
CID44041_AAATGCCCAATGTTGC	Background
CID44041_AACTCAGCAAGCCGCT	Background
CID44041_AAGGAGCGTGTCGCTG	Background
CID44041_AAGGTTCAGTGAAGAG	Background
CID44041_AAGGTTCTCTCAACTT	Background
CID44041_ACACCGGAGGCCGAAT	Background
CID44041_ACACTGAGTCCGTGAC	Background
CID44041_ACATCAGAGCTAACTC	Background
CID44041_ACGATACGTATCACCA	High-Risk
[truncated: 40,513 more rows]

## Sheet: 3. scAB Cell Labels
Cell	Label
CID44041_AAAGTAGTCCTAGGGC	Background
CID44041_AACACGTCAACACCTA	Background
CID44041_AACTTTCTCCTACAGA	Background
CID44041_AAGGCAGTCATTGCGA	Background
CID44041_AAGGTTCGTTGTCGCG	Background
CID44041_AATCGGTAGAGCTGGT	Background
CID44041_ACCAGTACATGCTGGC	Background
CID44041_ACCTTTAAGACGCAAC	Background
CID44041_ACGGAGATCGATGAGG	Background
CID44041_ACTGCTCAGCTGTCTA	Background
CID44041_ACTTGTTCATGGTAGG	Background
CID44041_AGGTCATTCACCCTCA	Background
CID44041_AGTCTTTTCACTATTC	Background
CID44041_AGTGTCACAAGCTGGA	Background
CID44041_ATAAGAGGTAGCCTCG	Background
CID44041_CAAGAAATCCCGGATG	Background
CID44041_CACATAGCATTTGCTT	Background
CID44041_CACTCCAAGTTGAGAT	Background
CID44041_CAGCATATCCGGCACA	Background
CID44041_CAGCGACCATGGTCTA	Background
CID44041_CAGGTGCCATACTCTT	Background
CID44041_CATATGGTCAGGCCCA	Background
CID44041_CATCGGGAGTGGTCCC	Background
CID44041_CCACTACTCCAGATCA	Background
CID44041_CCAGCGAAGTGCGATG	Background
CID44041_CCGGGATCAGATGGCA	Background
CID44041_CCTTACGGTAATCACC	Background
CID44041_CGACCTTGTTCCACAA	Background
CID44041_CGACTTCTCGCTTAGA	Background
CID44041_CGCGTTTGTGCTGTAT	Background
CID44041_CGCTGGAGTCGAGATG	Background
CID44041_CGGGTCATCTTGCCGT	Background
CID44041_CGTCACTTCACCATAG	Background
CID44041_CGTCAGGTCGGTCCGA	Background
CID44041_CGTGAGCTCCTAGTGA	Background
CID44041_CGTGTAAGTCACTTCC	Background
CID44041_CGTTCTGGTCAGAAGC	Background
CID44041_CTACACCAGTACTTGC	Background
CID44041_CTACCCAGTCTCACCT	Background
CID44041_CTAGTGATCACCCGAG	Background
CID44041_GAAACTCAGGAATTAC	Background
CID44041_GAATAAGCAATGGTCT	Background
CID44041_GACCAATAGCCACTAT	Background
CID44041_GATCGATCATGTAGTC	Background
CID44041_GCAAACTTCGGAGCAA	Background
CID44041_GCATGATAGAACAATC	Background
CID44041_GGCCGATCACTCGACG	Background
CID44041_GTAACTGGTAAACCTC	Background
CID44041_GTACGTACAATGTTGC	Background
CID44041_GTCAAGTAGGGTGTTG	Background
CID44041_GTGTTAGAGGAATGGA	Background
CID44041_TAAGAGATCTGTCAAG	Background
CID44041_TACGGGCAGCGAAGGG	Background
CID44041_TAGACCAGTCGAACAG	Background
CID44041_TATGCCCGTCGACTGC	Background
CID44041_TCAGGATGTCTCCATC	Background
CID44041_TCATTTGTCACCTCGT	Background
CID44041_TCGTAGAAGAACTCGG	Background
CID44041_TCGTAGACAGACACTT	Background
CID44041_TCTATTGCACCTGGTG	Background
CID44041_TCTCATAGTCACAAGG	Background
CID44041_TGATTTCTCACCATAG	Background
CID44041_TGCCAAAGTTGTTTGG	Background
CID44041_TGGCTGGTCATCATTC	Background
CID44041_TGGGAAGAGCCCAATT	Background
CID44041_TGGGCGTGTTATGTGC	Background
CID44041_TGTCCCAAGTATCTCG	Background
CID44041_TTAGGCATCGGAAATA	Background
CID44041_TTTACTGCATGACGGA	Background
CID44041_TCGGTAAAGATGGGTC	Background
CID44041_CGGTTAATCTAAGCCA	Background
CID44041_CATCGAACATATACCG	Background
CID44041_CCTCAGTGTCCAGTGC	Background
CID44041_GCTGCGAAGAGTACCG	Background
CID44041_GGATTACAGAGGTTGC	Background
CID44041_ACGGAGACATCTCGCT	Background
CID44041_ATCCGAAGTGCAGACA	Background
CID44041_CATGGCGGTTCTGTTT	Background
CID44041_CTAATGGTCTACCTGC	Background
CID44041_TCCCGATTCAAACAAG	Background
CID44041_GGCTCGAGTTGCCTCT	Background
CID44041_AGTCTTTAGCAAATCA	Background
CID44041_TCATTTGTCCTGTAGA	Background
CID44041_TTGCGTCTCAGCACAT	Background
CID44041_GCATGATCAGTGACAG	Background
CID44041_CAGCTGGAGACAGAGA	Background
CID44041_CGACTTCGTTCTCATT	Background
CID44041_TTCTACAAGCTATGCT	Background
CID44041_AAAGCAAAGTAGGCCA	Background
CID44041_AAGGCAGAGACTTTCG	Background
CID44041_AATCGGTGTTCTGGTA	Background
CID44041_ATCCACCAGTGAAGTT	Background
CID44041_CAACCAAAGTTAAGTG	Background
CID44041_CAGCGACGTTGCCTCT	Background
CID44041_CAGGTGCAGTTGAGTA	Background
CID44041_CCTAAAGCAATAACGA	Background
CID44041_CGTCCATAGCTAGCCC	Background
CID44041_CTAACTTGTGCAACTT	Background
CID44041_CTTACCGGTGTGTGCC	Background
CID44041_GAACATCTCAACGAAA	Background
CID44041_GACGGCTTCGGTGTTA	Background
CID44041_GACTAACTCCACTGGG	Background
CID44041_GAGCAGAGTAGCGATG	Background
CID44041_GATGAAAAGTCAATAG	Background
CID44041_GCAGCCATCTTGAGGT	Background
CID44041_GTAACGTGTGAGGGAG	Background
CID44041_GTCTCGTGTACAAGTA	Background
CID44041_TAAGAGAAGCCGATTT	Background
CID44041_TATCAGGAGCATCATC	Background
CID44041_TTTACTGTCAGGATCT	Background
CID44041_AATCGGTGTGTTTGTG	Background
CID44041_ACGCCAGAGGTGTGGT	Background
CID44041_CACAGGCGTGAAAGAG	Background
CID44041_CCCAATCTCACCAGGC	Background
CID44041_CCCTCCTGTCGGCATC	Background
CID44041_CCTATTAAGAGGTAGA	Background
CID44041_CGTAGCGCAACACGCC	Background
CID44041_CTGATAGAGTGTACGG	Background
CID44041_GTATTCTTCACGCATA	Background
CID44041_TATGCCCGTACTCGCG	Background
CID44041_TTGAACGCACCGATAT	Background
CID44041_ATCTACTGTTCCAACA	Background
CID44041_AACACGTAGTTGAGTA	Background
CID44041_AGGCCACCATATGCTG	Background
CID44041_ATCTGCCGTGCGGTAA	Background
CID44041_GCACTCTTCTCGCTTG	Background
CID44041_AACCGCGCACATCCAA	Background
CID44041_ACTGTCCTCTGTGCAA	Background
CID44041_CAACTAGAGGTGCACA	Background
CID44041_CACATAGAGTACGACG	Background
CID44041_CACCTTGGTCTAAAGA	Background
CID44041_CCTTCGATCACCAGGC	Background
CID44041_CGTCAGGTCCACGACG	Background
CID44041_CTCTAATAGCTAACTC	Background
CID44041_CTGAAGTCAGGACCCT	Background
CID44041_GGAGCAAGTACACCGC	Background
CID44041_GTCGGGTTCCGCGGTA	Background
CID44041_GTTCTCGAGTGACTCT	Background
CID44041_TGCCCTATCTTACCTA	Background
CID44041_TGTATTCGTCAACTGT	Background
CID44041_TGTCCCAAGTTTGCGT	Background
CID44041_TTTATGCAGACGCACA	Background
CID44041_AAAGTAGTCTGATTCT	Background
CID44041_ACATCAGAGAGCCTAG	Background
CID44041_ACCCACTGTCTTCTCG	High-Risk
CID44041_ACGCAGCCACGGATAG	High-Risk
CID44041_ACTGATGGTCGGCACT	Background
CID44041_ACTTGTTTCAACACCA	High-Risk
CID44041_AGAATAGAGCGCTCCA	Background
CID44041_AGACGTTAGTTCCACA	High-Risk
CID44041_AGACGTTGTCCGTGAC	Background
CID44041_AGATTGCGTCTGCAAT	Background
CID44041_AGCCTAAGTAAACACA	High-Risk
CID44041_AGGTCATAGCCATCGC	Background
CID44041_AGTGAGGCAGAGTGTG	Background
CID44041_ATCTACTCACAGGTTT	Background
CID44041_ATGCGATGTTCCGTCT	Background
CID44041_ATGTGTGAGAATGTGT	Background
CID44041_ATTGGACTCCGCGCAA	Background
CID44041_CAACCTCTCAGGCAAG	Background
CID44041_CACACTCAGGTGGGTT	High-Risk
CID44041_CACATAGTCTGTTGAG	Background
CID44041_CACATTTCATCACGTA	Background
CID44041_CAGATCAAGCCAGAAC	Background
CID44041_CAGATCAGTAAGGATT	Background
CID44041_CATCAGAAGGATATAC	Background
CID44041_CATGGCGTCGAATGGG	High-Risk
CID44041_CCGTGGAGTTTGGGCC	High-Risk
CID44041_CCTATTACAAGGACTG	Background
CID44041_CCTTCCCAGTCTCGGC	Background
CID44041_CGATGGCCATGCTGGC	Background
CID44041_CGCTGGATCATGCAAC	Background
CID44041_CGTCTACCAGCAGTTT	Background
CID44041_CTCACACCAAAGGCGT	High-Risk
CID44041_CTCGGGAAGATAGTCA	Background
CID44041_CTTCTCTCATATGAGA	High-Risk
CID44041_GAACCTAAGGTAAACT	High-Risk
CID44041_GACACGCGTCTCCACT	Background
CID44041_GACCTGGAGACAGGCT	Background
CID44041_GACGTTACACTGCCAG	Background
CID44041_GAGTCCGTCCCAGGTG	High-Risk
CID44041_GCATGATTCTACGAGT	High-Risk
CID44041_GGAAAGCAGATAGGAG	Background
CID44041_GGCGACTCATGTCTCC	Background
CID44041_GTAACGTTCGGAGGTA	High-Risk
CID44041_GTACTCCTCCCGGATG	High-Risk
CID44041_GTACTTTAGCTCAACT	High-Risk
CID44041_GTCATTTCACACCGAC	Background
CID44041_GTCATTTGTCTGGTCG	High-Risk
CID44041_GTGCTTCTCTTGCCGT	High-Risk
CID44041_TACAGTGGTTCAACCA	High-Risk
CID44041_TAGAGCTGTTACTGAC	Background
CID44041_TAGAGCTTCAAGGTAA	High-Risk
CID44041_TAGCCGGTCGTTTGCC	High-Risk
CID44041_TATGCCCGTCTAGAGG	Background
CID44041_TCACGAATCTTATCTG	High-Risk
CID44041_TCAGCAAAGTTCGCGC	High-Risk
CID44041_TCGCGAGAGTGAATTG	High-Risk
CID44041_TCGCGTTGTCCAGTAT	Background
CID44041_TCTGAGAAGAAAGTGG	High-Risk
CID44041_TCTTCGGAGCGTGAGT	Background
CID44041_TGGTTAGGTCAAAGAT	High-Risk
CID44041_TTAGGACTCATTCACT	Background
CID44041_TTGCCGTAGTTAAGTG	Background
CID44041_TTTCCTCGTCAGAATA	High-Risk
CID44041_AACCATGCATGTAAGA	High-Risk
CID44041_AACGTTGTCCCTTGCA	Background
CID44041_ACGCAGCCATATGGTC	Background
CID44041_ACTTGTTTCTTCATGT	Background
CID44041_CAACTAGAGTACACCT	High-Risk
CID44041_CACATAGTCTAGCACA	High-Risk
CID44041_CAGCCGAAGATCCGAG	High-Risk
CID44041_CAGTCCTCACGCGAAA	Background
CID44041_CCCTCCTAGCGAAGGG	High-Risk
CID44041_CGGCTAGTCAACCATG	High-Risk
CID44041_CGTGTCTGTAGGAGTC	Background
CID44041_CTAATGGTCCTCATTA	High-Risk
CID44041_CTCGAAATCCTATGTT	Background
CID44041_GACCTGGGTGGCAAAC	Background
CID44041_GCATGATGTACGACCC	Background
CID44041_TACTTACCACCTGGTG	Background
CID44041_TACTTACTCCAAAGTC	High-Risk
CID44041_TGGTTCCGTAGCGCAA	Background
CID44041_TTAGGCACATGATCCA	High-Risk
CID44041_TTGGCAAGTGGCAAAC	Background
CID44041_AGCCTAAGTTCTGTTT	Background
CID44041_AGCGTATAGGAGTACC	Background
CID44041_CACATAGAGCTTCGCG	Background
CID44041_CCTCTGACACGGCTAC	Background
CID44041_CGATGTATCCTTAATC	High-Risk
CID44041_CGCCAAGTCAAAGACA	Background
CID44041_CGTGAGCCAATCACAC	Background
CID44041_GCTCCTAGTTTGGCGC	Background
CID44041_TCACAAGAGTCATCCA	Background
CID44041_TGATTTCAGTCATCCA	Background
CID44041_TGGTTAGCAATGCCAT	Background
CID44041_AAGTCTGCACGGACAA	High-Risk
CID44041_ACTTGTTCAGCGTCCA	High-Risk
CID44041_AGCCTAAAGATACACA	High-Risk
CID44041_ATTCTACGTAATCGTC	High-Risk
CID44041_ATTGGTGCATGGTCAT	High-Risk
CID44041_CAACTAGGTCACACGC	High-Risk
CID44041_CAGAGAGTCGATCCCT	High-Risk
CID44041_CTCGGGATCTTCAACT	High-Risk
CID44041_GGGACCTCACCAACCG	Background
CID44041_GTACGTAAGTAATCCC	High-Risk
CID44041_GTACTCCAGTCTCCTC	High-Risk
CID44041_GTATTCTAGTGAATTG	High-Risk
CID44041_TCCCGATTCCATGCTC	High-Risk
CID44041_TGGCTGGCACGCATCG	High-Risk
CID44041_TGGCTGGCAGACACTT	High-Risk
CID44041_TTCTCAATCGCCCTTA	High-Risk
CID44041_GGTATTGAGATGCCTT	High-Risk
CID44041_TGACAACAGCGAGAAA	Background
CID44041_CTCGAAAAGCTTATCG	Background
CID44041_GTAACTGAGTGTACCT	Background
CID44041_TTGCCGTTCAGCAACT	High-Risk
CID44041_CATTATCAGCTGCGAA	Background
CID44041_TACACGACAGAGTGTG	Background
CID44041_AACTCCCAGTACCGGA	High-Risk
CID44041_AACTTTCGTGGCCCTA	Background
CID44041_AAGACCTGTCAATGTC	High-Risk
CID44041_ACAGCTATCGTACCGG	High-Risk
CID44041_ACGAGGAAGAGTAAGG	High-Risk
CID44041_AGAATAGTCCGCTGTT	Background
CID44041_ATCCGAAGTGTGAATA	Background
CID44041_CACACAAAGCCACGCT	High-Risk
CID44041_CACCACTAGTTGCAGG	Background
CID44041_CATCAGACAACACCTA	Background
CID44041_CATGGCGTCCGCGTTT	Background
CID44041_CCTAGCTGTACTTCTT	Background
CID44041_CCTCTGACATCCCATC	Background
CID44041_CGCTGGAGTCAATGTC	Background
CID44041_CTACACCCATCCTAGA	Background
CID44041_GAATAAGTCTCTTATG	Background
CID44041_GATGCTATCACTTATC	Background
CID44041_GCGGGTTTCTACTTAC	High-Risk
CID44041_GTCTTCGGTATAATGG	Background
CID44041_GTGCTTCAGGATGGTC	Background
CID44041_GTTCATTCAGGTCCAC	Background
CID44041_TAAGTGCGTTGCTCCT	High-Risk
CID44041_TATCAGGCATGCTGGC	Background
CID44041_TCGGGACTCCCGACTT	High-Risk
CID44041_TCTTCGGGTCGGCTCA	Background
CID44041_TGCCCATAGCGTCAAG	Background
CID44041_TGGCGCACACGGCCAT	Background
CID44041_TGTATTCTCCTGTACC	Background
CID44041_TGTTCCGAGCGGATCA	High-Risk
CID44041_AAACCTGAGCGTAGTG	High-Risk
CID44041_AAGTCTGAGTCTCCTC	High-Risk
CID44041_AATCCAGGTGATGTGG	High-Risk
CID44041_ACACCAATCAGTGTTG	High-Risk
CID44041_ACAGCTACAGACACTT	High-Risk
CID44041_ACGATGTCATGTCCTC	Background
CID44041_ACGGGTCTCGCAAGCC	High-Risk
CID44041_ACTATCTGTTCCAACA	High-Risk
CID44041_ACTTACTAGACAAGCC	Background
CID44041_ACTTTCAAGCTCCCAG	High-Risk
CID44041_AGCATACTCCCAGGTG	High-Risk
CID44041_AGTAGTCGTCAAGCGA	Background
CID44041_AGTAGTCTCCTCAATT	Background
CID44041_AGTCTTTCAAACTGCT	High-Risk
CID44041_ATAAGAGGTTCAGGCC	Background
CID44041_ATAGACCTCCAGGGCT	High-Risk
CID44041_ATCCACCGTAGAGCTG	High-Risk
CID44041_ATTCTACGTTCATGGT	Background
CID44041_CAAGGCCTCACCAGGC	Background
CID44041_CACACCTCAGTCGATT	High-Risk
CID44041_CACAGGCCATCTCGCT	Background
CID44041_CACCTTGAGACTAGAT	Background
CID44041_CCACCTATCAGAAATG	High-Risk
CID44041_CCAGCGACAGCCAATT	High-Risk
CID44041_CCAGCGATCATTATCC	High-Risk
CID44041_CCATGTCGTATAGTAG	High-Risk
CID44041_CCGTACTTCGTCGTTC	High-Risk
CID44041_CCGTGGAGTCTCACCT	Background
CID44041_CCTATTAGTCACTTCC	High-Risk
CID44041_CGATGGCCATCGGAAG	Background
CID44041_CGATTGACATATACGC	Background
CID44041_CGGAGTCAGTGATCGG	High-Risk
CID44041_CGGAGTCTCCGAATGT	Background
CID44041_CGGCTAGCACAGATTC	High-Risk
CID44041_CTCATTATCAGGTAAA	Background
CID44041_CTCTGGTTCCTCAATT	Background
CID44041_CTGAAGTCAGATTGCT	High-Risk
CID44041_CTTCTCTCAATCTGCA	Background
CID44041_GAACCTAAGATCTGAA	High-Risk
CID44041_GACGCGTTCATCGATG	High-Risk
CID44041_GACGTTAAGCTAGTTC	Background
CID44041_GACGTTAAGGGCTTCC	Background
CID44041_GATTCAGAGTACCGGA	Background
CID44041_GCAGCCATCTTGCATT	High-Risk
CID44041_GCAGTTATCCACGAAT	High-Risk
CID44041_GCATACAGTTACAGAA	High-Risk
CID44041_GCATGATGTGACGCCT	Background
CID44041_GCTGCGACACACCGCA	High-Risk
CID44041_GGACATTAGGGTCGAT	High-Risk
CID44041_GGATGTTTCTGTACGA	Background
CID44041_GGGCACTCAACAACCT	High-Risk
CID44041_GGGTTGCGTGCACGAA	High-Risk
CID44041_GTCTCGTAGCCTCGTG	High-Risk
CID44041_GTGTGCGTCCGCGGTA	Background
CID44041_GTTCGGGAGAAACCAT	High-Risk
CID44041_GTTTCTACATGGGAAC	High-Risk
CID44041_TAAGAGATCCCACTTG	Background
CID44041_TAGAGCTTCGTACGGC	Background
CID44041_TATCAGGAGGATGGAA	Background
CID44041_TCAACGATCCTAAGTG	High-Risk
CID44041_TCAGCAACAATCCGAT	High-Risk
CID44041_TCCACACTCAGCTGGC	High-Risk
CID44041_TCGAGGCGTGCGCTTG	Background
CID44041_TCGAGGCTCCACGTGG	High-Risk
CID44041_TGCCCTACATATACGC	High-Risk
CID44041_TGGGCGTCAGGGTTAG	High-Risk
CID44041_TGTCCCAAGCGTAGTG	Background
CID44041_TTAACTCTCTGTGCAA	Background
CID44041_TTGCCGTCACTCTGTC	Background
CID44041_TTTATGCGTTGTACAC	Background
CID44041_TTCGGTCCAGACGCAA	High-Risk
CID44041_AAAGCAACAAATACAG	High-Risk
CID44041_ACTGAACGTTACGGAG	High-Risk
CID44041_CGAGCCATCGTCTGCT	High-Risk
CID44041_GGGCATCTCCAATGGT	High-Risk
CID44041_ACAGCCGCATGCCCGA	High-Risk
CID44041_ATTATCCCATTCGACA	High-Risk
CID44041_CCAATCCTCATCGATG	High-Risk
CID44041_CCATGTCTCCCTCTTT	High-Risk
CID44041_CTGATCCTCTCCTATA	High-Risk
CID44041_TCTCATACAGGGTACA	High-Risk
CID44041_CCTTTCTAGCAGCCTC	High-Risk
CID44041_AATCCAGGTTGTCTTT	High-Risk
CID44041_AGAGCGATCAATCTCT	Background
CID44041_CACACTCAGTTCGCAT	Background
CID44041_AACCATGTCTTGCATT	High-Risk
CID44041_AATCGGTCAGGCTCAC	High-Risk
CID44041_ACAGCTAAGCGTTTAC	Background
CID44041_CAGCTGGTCTACCTGC	High-Risk
CID44041_CAGGTGCCAGTAGAGC	High-Risk
CID44041_CCACGGATCCGAACGC	High-Risk
CID44041_CCCATACTCGCCTGTT	Background
CID44041_CGCGGTATCAGTCCCT	High-Risk
CID44041_CTCACACGTCTCTCGT	High-Risk
CID44041_GACGTGCTCCGAACGC	High-Risk
CID44041_GACTACATCAGCTGGC	High-Risk
CID44041_GATCGCGCAGGTGCCT	Background
CID44041_GCATGCGAGAGGGATA	High-Risk
CID44041_GTCTTCGGTCGCGTGT	Background
CID44041_TGTGGTAAGAAGGACA	Background
CID44041_CCACTACGTCTCTCTG	Background
CID44041_GCTGGGTTCTATCCCG	Background
CID44041_GGACGTCAGTGAAGTT	Background
CID44041_GGTATTGTCACGGTTA	Background
CID44041_TATGCCCGTTAAAGTG	Background
CID44041_TCGTAGATCGCTGATA	Background
CID44041_TGACTTTAGGCAGGTT	Background
CID44041_AGAGCTTTCACAGGCC	High-Risk
CID44041_CCTCAGTAGATGGGTC	High-Risk
CID44041_AACCATGAGGACATTA	High-Risk
CID44041_GTATTCTCAGGACGTA	High-Risk
CID44041_ACCAGTATCCTAGTGA	Background
CID44041_GACGGCTTCAGCAACT	High-Risk
CID44041_GCATGTACATTTCACT	High-Risk
CID44041_TCAGCTCTCAGCTCTC	Background
CID44041_GTCTTCGGTTGTCTTT	High-Risk
CID44041_ACTGAGTTCTTATCTG	High-Risk
CID44041_AAACCTGAGACAAAGG	Background
CID44041_CGAGCACCACATGACT	Background
CID44041_GTAACGTAGCCTCGTG	Background
CID44041_TTGGCAATCTTATCTG	Background
CID44041_AACACGTCACCGGAAA	Background
CID44041_AACTCTTAGGTGCTAG	High-Risk
CID44041_AACTGGTTCTTCCTTC	Background
CID44041_ACGAGCCAGGTTACCT	Background
CID44041_ACTGCTCGTTATCCGA	High-Risk
CID44041_AGGGTGATCACGAAGG	Background
CID44041_AGGTCCGCAGCTTCGG	High-Risk
CID44041_ATTACTCAGACTAAGT	High-Risk
CID44041_ATTCTACTCTATCCCG	Background
CID44041_CAACCTCTCTTGGGTA	High-Risk
CID44041_CACACAAGTGGTAACG	High-Risk
CID44041_CACACAATCGGGAGTA	Background
CID44041_CAGATCAAGCATGGCA	High-Risk
CID44041_CAGATCATCATGCATG	Background
CID44041_CAGCAGCTCTATCCTA	High-Risk
CID44041_CAGCGACCACGAAATA	Background
CID44041_CAGTCCTCAGCGAACA	High-Risk
CID44041_CATCCACCATGGGACA	Background
CID44041_CATTATCTCCCAACGG	Background
CID44041_CCTACACAGTCAAGCG	High-Risk
CID44041_CCTATTACATATGCTG	High-Risk
CID44041_CCTATTAGTGCACCAC	High-Risk
CID44041_CCTTCCCGTCATACTG	Background
CID44041_CGATCGGCAAGAGTCG	High-Risk
CID44041_CGGACTGGTTTAAGCC	Background
CID44041_CGGGTCACATACAGCT	Background
CID44041_CGTAGGCTCATCTGTT	Background
CID44041_CGTCACTCAGTCCTTC	Background
CID44041_CGTCTACAGAACAACT	High-Risk
CID44041_CTAGCCTCACGGTAGA	High-Risk
CID44041_CTGCCTAAGGGATGGG	High-Risk
CID44041_GAAATGAAGCTAACTC	Background
CID44041_GAATAAGGTACATCCA	Background
CID44041_GAATGAATCTGATACG	Background
CID44041_GACGCGTCATTCCTCG	High-Risk
CID44041_GACGTGCTCTAGAGTC	High-Risk
CID44041_GACGTTAGTAATTGGA	High-Risk
CID44041_GACGTTAGTGGCAAAC	High-Risk
CID44041_GACTACACATTTGCTT	Background
CID44041_GACTACATCCAAATGC	Background
CID44041_GATCGATCACTCTGTC	High-Risk
CID44041_GATCTAGTCGCCAAAT	High-Risk
CID44041_GCAAACTTCTCCAGGG	High-Risk
CID44041_GCACATATCCACTCCA	Background
CID44041_GCAGCCATCAGTTAGC	High-Risk
CID44041_GCATGATGTCTTCTCG	High-Risk
CID44041_GCATGCGTCGCACTCT	Background
CID44041_GCCAAATTCCATGAAC	Background
CID44041_GCGCAGTCAGCTCGCA	High-Risk
CID44041_GCGCAGTTCAGTTAGC	High-Risk
CID44041_GCTGGGTTCGTTTGCC	High-Risk
CID44041_GGCGTGTAGCAATATG	Background
CID44041_GTCAAGTAGCTGAACG	Background
CID44041_GTGGGTCTCCAATGGT	High-Risk
CID44041_TAAGAGACAAAGTGCG	Background
CID44041_TAAGCGTAGATGTGTA	Background
CID44041_TAGACCATCCTGCAGG	Background
CID44041_TAGCCGGTCACGCGGT	High-Risk
CID44041_TCAGGATCAATCACAC	Background
CID44041_TCTTCGGAGAGCTGGT	Background
CID44041_TCTTCGGGTCTGGAGA	High-Risk
CID44041_TGACAACCACACCGCA	High-Risk
CID44041_TGAGCATCACGTGAGA	High-Risk
CID44041_TGAGCCGCAATAAGCA	Background
CID44041_TGCACCTAGAAACCGC	High-Risk
CID44041_TGCTACCAGAGTACAT	High-Risk
CID44041_TGGCGCAGTGAACCTT	Background
CID44041_TGGCTGGCACTGTCGG	High-Risk
CID44041_TGGGCGTAGCTAGGCA	Background
CID44041_TTAACTCGTGGGTATG	Background
CID44041_TTAGGCAGTCAATGTC	High-Risk
CID44041_TTAGTTCTCTGCCAGG	Background
CID44041_TTCTTAGAGTGTCTCA	High-Risk
CID44041_TTGACTTAGGGAACGG	Background
CID44041_TTGCGTCCAGTACACT	High-Risk
CID44041_TTGGCAATCGACCAGC	Background
CID44041_TTTATGCCACTTGGAT	Background
CID44041_AGTTGGTTCAAACCAC	High-Risk
CID44041_ATTTCTGAGTCGATAA	Background
CID44041_CATATTCTCACCGTAA	Background
CID44041_CATCAAGAGGCTAGGT	High-Risk
CID44041_CGAACATCAAGAAAGG	High-Risk
CID44041_ATTGGTGAGTATTGGA	High-Risk
CID44041_CTGCCTACAACCGCCA	High-Risk
CID44041_AACTGGTGTAAGTGGC	High-Risk
CID44041_ACGGAGAAGTCCAGGA	High-Risk
CID44041_ACGTCAAGTAGAAAGG	High-Risk
CID44041_CACACTCGTCCGTGAC	High-Risk
CID44041_CACAGTATCTGTTTGT	High-Risk
CID44041_CATCGGGTCCGTTGCT	High-Risk
CID44041_CCACTACGTACTTCTT	High-Risk
CID44041_CGAGAAGTCGGTGTCG	High-Risk
CID44041_CGTAGGCCAGTAGAGC	High-Risk
CID44041_CTAATGGTCGGCGCTA	High-Risk
CID44041_CTCTACGCATTAGGCT	High-Risk
CID44041_CTTCTCTGTCGACTAT	High-Risk
CID44041_GATCGCGCATAGACTC	High-Risk
CID44041_GCGACCATCGTTTAGG	High-Risk
CID44041_GCTGCTTCAGGGCATA	High-Risk
CID44041_GCTTCCAAGAGTTGGC	High-Risk
CID44041_TTGGCAAGTAAACCTC	High-Risk
CID44041_CAACCAACAGGGTACA	Background
CID44041_CTGCTGTTCCTGCAGG	High-Risk
CID44041_CGATGTAGTGGCGAAT	High-Risk
CID44041_AGATTGCCACAACGCC	High-Risk
CID44041_CACACTCAGGTGCTTT	High-Risk
CID44041_CGACTTCAGGGAACGG	High-Risk
CID44041_TCACAAGGTAGAAGGA	Background
CID44041_GAACCTACAAGGACTG	High-Risk
CID44041_CGCGTTTAGCTGAACG	High-Risk
CID44041_AAACGGGAGAGAGCTC	Background
CID44041_AACGTTGAGAACAATC	High-Risk
CID44041_ACGATACAGTCTTGCA	Background
CID44041_AGCAGCCGTCCGCTGA	Background
CID44041_CATATGGCATCCGCGA	Background
CID44041_CGACCTTGTGTCCTCT	High-Risk
CID44041_CGCGGTAAGCTAACAA	High-Risk
CID44041_GCATGTACACCAGGTC	High-Risk
CID44041_TACCTTAAGAGGTTGC	Background
CID44041_TATCTCATCACGCATA	High-Risk
CID44041_TTTGCGCGTGAGGGTT	High-Risk
CID44041_CCTTTCTGTGTTTGGT	Background
CID44041_TTGTAGGAGCGTTCCG	High-Risk
CID44041_AAAGATGTCTCAAGTG	Background
CID44041_CGAGAAGGTCCCGACA	Background
CID44041_TAAACCGGTCATTAGC	Background
CID44041_ACTGAACCACAGCGTC	High-Risk
CID44041_AGCCTAAGTGCAACTT	High-Risk
CID44041_AGGCCGTCATTGTGCA	High-Risk
CID44041_CAGCCGAAGTGCGTGA	High-Risk
CID44041_CGACCTTGTCAGCTAT	High-Risk
CID44041_CTCATTACAATCACAC	High-Risk
CID44041_GTATTCTAGCACCGTC	High-Risk
CID44041_TCTCATAAGGAGTACC	High-Risk
CID44041_TGGTTAGAGGCTCAGA	High-Risk
CID44041_TTCTACACACATTCGA	High-Risk
CID44041_TTGAACGGTGAAATCA	High-Risk
CID44041_CTCATTAGTTGGGACA	High-Risk
CID44041_GAACCTATCGGTCTAA	High-Risk
CID44041_TACAGTGTCAGTACGT	High-Risk
CID44041_GCCTCTAGTAAGCACG	High-Risk
CID44041_TGATTTCCAAACGTGG	Background
CID44041_GACTAACTCTGACCTC	High-Risk
CID44041_GATGAGGTCACGATGT	High-Risk
CID44041_TATCTCACACGTCAGC	High-Risk
CID44041_AAGCCGCCAACTTGAC	High-Risk
CID44041_CTAGTGATCTCCCTGA	High-Risk
CID44041_TGCCCTAAGTCTCCTC	High-Risk
CID44041_ACGTCAATCACGGTTA	High-Risk
CID44041_CTTAGGATCCCTGACT	High-Risk
CID44041_ATCCGAACAAAGCGGT	Background
CID44041_CGATGGCGTCTGGAGA	High-Risk
CID44041_GGGAGATGTAGCCTCG	Background
CID44041_CATCGAACATTATCTC	High-Risk
CID44041_GATCGTACACCATGTA	High-Risk
CID44041_AAGTCTGGTTCAGACT	High-Risk
CID44041_CGGGTCAGTCCATGAT	High-Risk
CID44041_GGCCGATGTTAAGATG	High-Risk
CID44041_TCGGGACTCCGATATG	Background
CID44041_CCCATACGTACAGTTC	High-Risk
CID44041_GTAGGCCTCATACGGT	High-Risk
CID44041_CCTCAGTCAGATAATG	High-Risk
CID44041_GGTATTGGTACCATCA	Background
CID44041_TAGCCGGCAATCGGTT	High-Risk
CID44041_TGCTGCTGTTAAAGTG	High-Risk
CID44041_ACATCAGCATCAGTCA	High-Risk
CID44041_TGAGAGGGTTTGGCGC	High-Risk
CID44041_CCGTTCAAGTGGGATC	Background
CID44041_CACACCTTCGTGTAGT	Background
CID44041_CTGCTGTTCGGTTAAC	Background
CID44041_GCATGATGTTCCCTTG	Background
CID44041_GTGAAGGTCGGAAACG	High-Risk
CID44041_TCAGGATTCGTACCGG	Background
CID44041_TCTCTAACAGTACACT	Background
CID44041_CATCGGGTCCGTCATC	High-Risk
CID44041_CTAGAGTGTCATATCG	High-Risk
CID44041_GCTGCTTTCAGAGCTT	High-Risk
CID44041_GGACGTCGTATAGGTA	High-Risk
CID44041_GGTGTTAAGGTTACCT	High-Risk
CID44041_TGGTTCCTCAGAAATG	High-Risk
CID44041_AGACGTTTCGTTTAGG	Background
CID44041_CAGCGACTCTACGAGT	High-Risk
CID44041_GCTGCGAGTTGTGGAG	High-Risk
CID44041_TGACTAGGTGACCAAG	High-Risk
CID44041_TTGGCAATCGTCTGCT	High-Risk
CID44041_CAAGATCAGCAGACTG	Background
CID44041_CCGTACTAGCAGATCG	Background
CID44041_CTGTTTAAGGCTAGCA	High-Risk
CID44041_GCATGCGCAACTGGCC	High-Risk
CID44041_GCGCAGTTCTAACTTC	Background
CID44041_AACGTTGAGTTTAGGA	High-Risk
CID44041_TGGGAAGCATGGAATA	High-Risk
CID44041_GCTGCGAAGGGTCTCC	High-Risk
CID44041_GTGTTAGGTTCTGGTA	High-Risk
CID44041_CCTCAGTAGGGCACTA	High-Risk
CID44041_CTGATAGAGCTAGTTC	Background
CID44041_GCTTCCATCACAGGCC	High-Risk
CID44041_TTCTCAACAAGACACG	Background
CID44041_CGGACTGTCCTCAATT	Background
CID44041_GTCGGGTCAGGCTGAA	High-Risk
CID44041_TTTACTGAGACCTTTG	Background
CID44041_CCACTACTCGGTCTAA	High-Risk
CID44041_ACACCCTGTTCCACTC	High-Risk
CID44041_ACCGTAACAAGAGTCG	High-Risk
CID44041_CCGTTCATCCGCATCT	High-Risk
CID44041_TATTACCCACTAGTAC	High-Risk
CID44041_AGCGGTCGTTATGCGT	High-Risk
CID44041_CACACAACAGCGAACA	High-Risk
CID44041_TCAACGAGTCTCTTAT	High-Risk
CID44041_ACGCCAGCAAATCCGT	High-Risk
CID44041_AGAATAGTCCTTAATC	High-Risk
CID44041_ATAACGCTCATGGTCA	High-Risk
CID44041_GACCTGGCAATAGAGT	High-Risk
CID44041_TCGTAGATCTACTTAC	High-Risk
CID44041_GTCTCGTTCGAGAACG	High-Risk
CID44041_ACGAGCCGTCCTCTTG	High-Risk
CID44041_GGAAAGCTCCGTACAA	High-Risk
CID44041_GTTCATTCAGACGCAA	High-Risk
CID44041_AAAGTAGCATTACGAC	High-Risk
CID44041_AGCCTAAGTATGAAAC	High-Risk
CID44041_AGCGTCGGTTACGCGC	High-Risk
CID44041_AGCTTGACAACTGGCC	High-Risk
CID44041_AGGGAGTGTGCACTTA	High-Risk
CID44041_CACCAGGCACATGACT	Background
CID44041_CAGAGAGTCCGAATGT	High-Risk
CID44041_CCATGTCAGCGTAATA	High-Risk
CID44041_CCGGTAGTCGGAGGTA	High-Risk
CID44041_CCTTTCTTCGCGTAGC	High-Risk
CID44041_CGACCTTAGACAGACC	High-Risk
CID44041_CGACTTCCAGTAAGCG	High-Risk
CID44041_CGAGCACAGCATCATC	High-Risk
CID44041_CGGCTAGTCTTTACGT	High-Risk
CID44041_CTCGAGGCATCGATTG	High-Risk
CID44041_CTTTGCGGTCAAAGAT	High-Risk
CID44041_GCACTCTGTGGTCCGT	High-Risk
CID44041_GCGAGAAGTCTTTCAT	High-Risk
CID44041_GCTGGGTCAAGTCTGT	High-Risk
CID44041_GTCACAAAGTACCGGA	High-Risk
CID44041_GTCTCGTCAAGCCCAC	High-Risk
CID44041_TGCCAAACAAGTACCT	High-Risk
CID44041_TGCCCTACAATGAAAC	High-Risk
CID44041_TGCGCAGGTTAAAGTG	High-Risk
CID44041_TGTATTCTCGATGAGG	High-Risk
CID44041_TTGTAGGTCTCTGAGA	High-Risk
CID44041_AGCTTGAGTCCCTACT	High-Risk
CID44041_GCATACAGTGTATGGG	High-Risk
CID44041_GTCCTCAAGCACAGGT	High-Risk
CID44041_TAGAGCTAGGATCGCA	High-Risk
CID44041_TCGAGGCAGAATCTCC	High-Risk
CID44041_AGCTCTCTCACCGGGT	High-Risk
CID44041_AGTGTCAGTCAACTGT	High-Risk
CID44041_CATGCCTCATTTCAGG	High-Risk
CID44041_GTTCTCGAGGCTAGGT	High-Risk
CID44041_TGACGGCCAGCTATTG	High-Risk
CID44041_TGGCCAGGTCTTGTCC	Background
CID44041_CTACATTTCTCCGGTT	High-Risk
CID44041_GTACTTTTCGCCGTGA	High-Risk
CID44041_ACTTACTAGTCAATAG	High-Risk
CID44041_AGAGTGGTCGCAAGCC	High-Risk
CID44041_AGCAGCCGTCACCCAG	High-Risk
CID44041_ATAACGCCAGACAAGC	High-Risk
CID44041_CACAGTATCACATACG	High-Risk
CID44041_CATTATCCAATCCGAT	High-Risk
CID44041_CATTCGCCAGTACACT	High-Risk
CID44041_CCCAATCCAAGGCTCC	High-Risk
CID44041_CTCTGGTGTAAATGAC	High-Risk
CID44041_GACTGCGAGTACGACG	High-Risk
CID44041_GGACAAGAGATCCTGT	High-Risk
CID44041_GGATGTTCACATGTGT	High-Risk
CID44041_GGTGCGTAGAGCTGCA	High-Risk
CID44041_GTAACTGAGACAAAGG	High-Risk
CID44041_GTAACTGCAACGCACC	High-Risk
CID44041_GTAGGCCGTCTTGATG	High-Risk
CID44041_TCAATCTTCCGTCATC	High-Risk
CID44041_TCACAAGAGGCTCAGA	High-Risk
CID44041_TCACGAAAGGCCCTTG	High-Risk
CID44041_TCAGCTCGTAGATTAG	Background
CID44041_TCGGGACAGCAATATG	High-Risk
CID44041_TCTGGAAGTCATATGC	High-Risk
CID44041_TGAAAGACACGCTTTC	High-Risk
CID44041_TGAGAGGGTTATCACG	High-Risk
CID44041_TTATGCTTCTCGATGA	High-Risk
CID44041_TTGACTTGTAGCCTAT	High-Risk
CID44041_TTTGCGCGTTCCGGCA	High-Risk
CID44041_AATCGGTTCCAGAGGA	High-Risk
CID44041_CAGCTAAGTCTTGTCC	High-Risk
CID44041_CATCGGGCATAGTAAG	High-Risk
CID44041_CATGACAGTCAAAGCG	High-Risk
CID44041_CGTTCTGGTCAACTGT	High-Risk
CID44041_CTGCCTATCTGTTGAG	High-Risk
CID44041_GTTAAGCGTTAAGACA	Background
CID44041_CTCATTACATCCGGGT	High-Risk
CID44041_AGGTCCGCACGAGAGT	High-Risk
CID44041_GCTGCTTCATTCTCAT	High-Risk
CID44041_TGCCAAAGTTGTACAC	High-Risk
CID44041_TGTATTCCAGACGCTC	High-Risk
CID44041_CCTTTCTCAGCCTTTC	High-Risk
CID44041_GACGTGCTCTCTGCTG	High-Risk
CID44041_GTTTCTACAGCCTGTG	High-Risk
CID44041_GCTGCGAAGAGCCTAG	High-Risk
CID44041_GGCGTGTCAATGAAAC	High-Risk
CID44041_TCGGTAAGTGTGAATA	High-Risk
CID44041_CATGGCGAGATCTGAA	High-Risk
CID44041_TTTGTCACAATGGATA	High-Risk
CID44041_AGCGTCGGTTTAGGAA	High-Risk
CID44041_GAGCAGAGTGGCCCTA	High-Risk
CID44041_TATCAGGGTAAAGGAG	High-Risk
CID44041_TGCCCATAGGCCCGTT	High-Risk
CID44041_CTTAACTTCGGATGGA	High-Risk
CID44041_AACTCCCCATCTCCCA	High-Risk
CID44041_AAGGTTCAGGCAGGTT	High-Risk
CID44041_ACGATACGTTACGTCA	High-Risk
CID44041_ACGGGCTGTGAAAGAG	High-Risk
CID44041_ACTATCTTCCCTTGCA	High-Risk
CID44041_ACTTTCAAGAAACGCC	High-Risk
CID44041_ACTTTCATCTAGAGTC	High-Risk
CID44041_AGCAGCCGTAGCGATG	High-Risk
CID44041_AGGGAGTTCGTGGGAA	High-Risk
CID44041_AGGGTGACATCGGACC	High-Risk
CID44041_AGTAGTCAGAGAGCTC	High-Risk
CID44041_ATAACGCTCTGCCCTA	High-Risk
CID44041_ATCACGACACAAGACG	High-Risk
CID44041_ATCCACCTCACATACG	High-Risk
CID44041_ATCCACCTCAGTGCAT	High-Risk
CID44041_ATTATCCTCCTCCTAG	High-Risk
CID44041_CACATAGTCAGCGACC	High-Risk
CID44041_CAGCCGACATGTCGAT	High-Risk
CID44041_CAGGTGCCATCGGTTA	High-Risk
CID44041_CATCAAGAGACTTGAA	High-Risk
CID44041_CATGACATCAACACGT	High-Risk
CID44041_CGGACTGGTAAATGTG	High-Risk
CID44041_CGGAGCTGTGATGTCT	High-Risk
CID44041_CGTCTACCAGTGGAGT	High-Risk
CID44041_CGTGAGCCATATGAGA	High-Risk
CID44041_CTGCTGTCACGTTGGC	High-Risk
CID44041_GAACGGACATACTACG	High-Risk
CID44041_GAATAAGTCTTGCCGT	High-Risk
CID44041_GACAGAGCAATACGCT	High-Risk
CID44041_GACGCGTAGTACGATA	High-Risk
CID44041_GATGAGGTCAGTTCGA	High-Risk
CID44041_GCACTCTAGTTCCACA	High-Risk
CID44041_GCGCCAATCTACCTGC	High-Risk
CID44041_GGCTCGAGTGAAATCA	High-Risk
CID44041_GGGAGATGTTTGTGTG	High-Risk
CID44041_GGTGTTAAGGGTCTCC	High-Risk
CID44041_GTAACGTAGTTGCAGG	High-Risk
CID44041_TACCTTACACTGTCGG	High-Risk
CID44041_TCGGGACTCGTCTGAA	High-Risk
CID44041_TGAAAGAAGGAGTTTA	High-Risk
CID44041_TGCCAAATCAGCATGT	High-Risk
CID44041_TGCGGGTTCGTCCAGG	High-Risk
CID44041_TGGCTGGCAGCTGTGC	High-Risk
CID44041_TTAGGCACATGGTAGG	High-Risk
CID44041_TTGTAGGCAGCTCGAC	High-Risk
CID44041_AACCATGAGCCAACAG	High-Risk
CID44041_AACCATGCATGAGCGA	High-Risk
CID44041_AAGGAGCGTACGAAAT	High-Risk
CID44041_ACAGCCGTCTGTACGA	High-Risk
CID44041_ACGATACCATGCAATC	High-Risk
CID44041_ACGCCGATCAACCAAC	High-Risk
CID44041_ACTGAACAGTGTACTC	High-Risk
CID44041_AGAGCTTCAAAGGAAG	High-Risk
CID44041_AGCATACGTGGTGTAG	High-Risk
CID44041_ATAGACCAGCCGGTAA	High-Risk
CID44041_ATCGAGTGTTCCCGAG	High-Risk
CID44041_CAAGATCTCCGTTGCT	High-Risk
CID44041_CACAAACAGTGTGGCA	High-Risk
CID44041_CAGATCAGTGCACTTA	High-Risk
CID44041_CAGCGACAGGTTCCTA	High-Risk
CID44041_CATATGGAGTTAGCGG	High-Risk
CID44041_CATCCACCAATGGATA	High-Risk
CID44041_CATGACAAGACTAAGT	High-Risk
CID44041_CCACGGAAGGGAGTAA	High-Risk
CID44041_CCACTACAGAAGGCCT	High-Risk
CID44041_CCTACCACAGATCGGA	High-Risk
CID44041_CCTCAGTTCCAGGGCT	High-Risk
CID44041_CGAATGTTCAAAGACA	High-Risk
CID44041_CGAGCCAGTCAATACC	High-Risk
CID44041_CGCTATCTCTGTTGAG	High-Risk
CID44041_CGTAGGCGTGAAGGCT	High-Risk
CID44041_CGTCCATGTCATTAGC	Background
CID44041_CTCCTAGGTACGCTGC	High-Risk
CID44041_CTTCTCTGTCTAAACC	High-Risk
CID44041_GACGTGCCAAAGCGGT	High-Risk
CID44041_GTACTTTTCTGCCAGG	High-Risk
CID44041_GTCGGGTCACATGACT	High-Risk
CID44041_GTGGGTCGTCGCGGTT	High-Risk
CID44041_TACCTTACAGTTCCCT	Background
CID44041_TGCGGGTGTCGCTTCT	High-Risk
CID44041_TGGCGCAGTCTGCCAG	High-Risk
CID44041_TGTTCCGTCTTAGCCC	High-Risk
CID44041_TTGGCAAGTACTCAAC	High-Risk
CID44041_TTTGTCACACATCTTT	High-Risk
CID44041_ACGCCGAGTTAGAACA	High-Risk
CID44041_ACTTGTTTCGTCCAGG	High-Risk
CID44041_ATCTACTGTCGGCATC	High-Risk
CID44041_GAACGGACACGAGAGT	High-Risk
CID44041_GTGCAGCAGACACTAA	High-Risk
CID44041_TAGAGCTTCAGCTTAG	High-Risk
CID44041_TGAGGGAAGATCCCGC	High-Risk
CID44041_ATTCTACAGCTAGGCA	Background
CID44041_CTAAGACGTATATCCG	High-Risk
CID44041_GGATTACAGAGTGACC	Background
CID44041_TCTCATAAGCCACGTC	High-Risk
CID44041_CCGGGATCAATGGAAT	High-Risk
CID44041_ACACTGAGTAAACACA	High-Risk
CID44041_CATCCACGTCGACTGC	High-Risk
CID44041_CGCTGGAAGTTGAGTA	High-Risk
CID44041_CGGACGTGTACTTCTT	High-Risk
CID44041_CTAACTTCACTGTGTA	High-Risk
CID44041_GGGAGATTCAAGGCTT	High-Risk
CID44041_TAAGTGCTCGGTGTCG	High-Risk
CID44041_TGGTTAGAGGCCGAAT	High-Risk
CID44041_CGATCGGAGAATGTGT	High-Risk
CID44041_AAACCTGCAAGACACG	Background
CID44041_AAAGCAAGTCATACTG	Background
CID44041_AACCATGTCGGCGCAT	Background
CID44041_AATCCAGTCTCGTATT	Background
CID44041_ACATACGGTTAAGTAG	Background
CID44041_ACCTTTACAAGTCTGT	Background
CID44041_ACGAGCCCACAGGTTT	Background
CID44041_ACGGAGAAGGTAAACT	Background
CID44041_ACGGGCTAGGTTACCT	Background
CID44041_AGCGTATGTACTTCTT	Background
CID44041_AGGCCGTTCAGATAAG	Background
CID44041_AGGTCATAGGCCATAG	Background
CID44041_ATGGGAGCACAACGTT	Background
CID44041_CAAGGCCCAGTAAGCG	Background
CID44041_CACTCCAAGCATGGCA	Background
CID44041_CAGAATCCATCCGTGG	Background
CID44041_CAGCGACTCATGTCCC	Background
CID44041_CATCGAAGTTCCAACA	Background
CID44041_CCATTCGGTGGGTATG	Background
CID44041_CCTACCAAGAATGTGT	Background
CID44041_CGACCTTTCTCCCTGA	Background
CID44041_CGAGCCACAAAGGTGC	Background
CID44041_CGGAGCTTCATCACCC	Background
CID44041_CGGAGTCAGATCCGAG	Background
CID44041_CGTAGCGCACCGATAT	Background
CID44041_CGTTCTGGTTATGCGT	Background
CID44041_CTACCCAAGTGCTGCC	Background
CID44041_CTACGTCGTGTTCTTT	Background
CID44041_CTCATTACACTGTCGG	Background
CID44041_CTCGAAACAAGCTGAG	Background
CID44041_CTCGGGACAAGAGTCG	Background
CID44041_CTGTGCTAGCTGTCTA	Background
CID44041_GACCTGGGTCATATGC	Background
CID44041_GATTCAGCAGCCTTTC	Background
CID44041_GCAATCATCGTCCAGG	Background
CID44041_GCATGCGTCCCGGATG	Background
CID44041_GCGCAACTCTTGAGAC	Background
CID44041_GCGGGTTTCATCTGTT	Background
CID44041_GCTCCTACACAGACAG	Background
CID44041_GCTGGGTAGATAGCAT	Background
CID44041_GGACAAGAGTTACCCA	Background
CID44041_GGACGTCTCGATAGAA	Background
CID44041_GGCGACTAGAGCTGGT	Background
CID44041_GTCGTAATCTCTTATG	Background
CID44041_GTTACAGAGTCATGCT	Background
CID44041_GTTTCTAGTACTCTCC	Background
CID44041_TACAGTGCAATGGAGC	Background
CID44041_TACTCGCTCAGGATCT	Background
CID44041_TATGCCCGTAGCGTAG	Background
CID44041_TCAACGAGTCACTGGC	Background
CID44041_TCTGAGAAGGAATGGA	Background
CID44041_TGACGGCAGAATGTTG	Background
CID44041_TGAGCATGTAGTGAAT	Background
CID44041_TGAGCCGTCAACACCA	Background
CID44041_TGCACCTAGAAGGTGA	Background
CID44041_TGGGAAGCATAGACTC	Background
CID44041_TGGTTCCCACATGTGT	Background
CID44041_TGTCCCAAGAAAGTGG	Background
CID44041_TTAGTTCCATCTACGA	Background
CID44041_TTGGAACCATATGGTC	Background
CID44041_TTGGAACTCGGCCGAT	Background
CID44041_TTTACTGCAGACGCCT	Background
CID44041_CTCGAGGCACAAGTAA	High-Risk
CID44041_TGGCGCATCGCAAGCC	Background
CID44041_TGTATTCGTTCAACCA	Background
CID44041_ACTGAACCATAACCTG	Background
CID44041_AAATGCCTCTGCTTGC	Background
CID44041_ATCCACCAGAATGTTG	Background
CID44041_CATCAAGGTAAACACA	Background
CID44041_TAGTTGGCATGCCTTC	Background
CID44041_TGAGAGGCATGTTGAC	Background
CID44041_AAACCTGAGGCTACGA	Background
CID44041_AACTCCCCACACTGCG	Background
CID44041_ACCCACTGTCGACTGC	Background
CID44041_ACGGGCTCACAGATTC	Background
CID44041_AGCTCTCTCCAAACAC	Background
CID44041_AGCTTGATCCATGAGT	Background
CID44041_CAGCAGCGTCGCATAT	Background
CID44041_CATATTCGTGATAAGT	Background
CID44041_CATCCACGTTCGCGAC	Background
CID44041_CCGGTAGCACGGTAAG	Background
CID44041_CGCTTCATCTGCCCTA	Background
CID44041_GGGTTGCAGAAAGTGG	Background
CID44041_GTCGGGTTCTCGTATT	Background
CID44041_TAGAGCTAGGTAAACT	Background
CID44041_TGCGCAGTCAGCATGT	Background
CID44041_TGGGAAGTCTGCAAGT	Background
CID44041_TTAGGCAGTTGCGTTA	Background
CID44041_TTCTCCTTCTACCAGA	Background
CID44041_CTTACCGCATCAGTCA	High-Risk
CID44041_CACCAGGTCCATGAGT	Background
CID44041_TGCCCATCACCGAATT	High-Risk
CID44041_AAGCCGCGTAGTACCT	Background
CID44041_ACGAGGACACCTATCC	Background
CID44041_ACTTGTTCAATCGAAA	Background
CID44041_ACTTTCAGTCATGCAT	Background
CID44041_CCTAAAGAGTCCCACG	Background
CID44041_CTAAGACAGTGGAGAA	Background
CID44041_GACCAATTCAACCATG	Background
CID44041_GTTACAGAGGCTACGA	Background
CID44041_TGAGCATAGCCCAGCT	Background
CID44041_AACTCAGCACATGGGA	Background
CID44041_ACCTTTAGTACCGTTA	Background
CID44041_ACTTTCATCCGCGCAA	Background
CID44041_AGCATACAGATCCCGC	Background
CID44041_AGCATACCATGGATGG	Background
CID44041_AGCTCCTAGAGCTGGT	Background
CID44041_AGCTCCTTCGCCGTGA	Background
CID44041_AGGTCATGTCCGAACC	Background
CID44041_AGTGTCATCTGGAGCC	Background
CID44041_CAACCAACAGGACGTA	Background
CID44041_CAGATCAAGTAACCCT	Background
CID44041_CCACCTAAGTTGTAGA	Background
CID44041_CGGAGTCAGAGCCCAA	Background
CID44041_GACTGCGAGCTGGAAC	Background
CID44041_GATCAGTGTAGCTCCG	Background
CID44041_GCTTCCACATGCGCAC	Background
CID44041_GTAACTGTCGAACTGT	Background
CID44041_GTATTCTCATCAGTCA	Background
CID44041_GTGGGTCTCTCTGTCG	Background
CID44041_GTTCTCGGTGACGGTA	Background
CID44041_TATCTCAGTCGAGATG	Background
CID44041_TCGCGAGCAGTTCATG	Background
CID44041_TCGTACCGTAAATGTG	Background
CID44041_TCTGAGACAGACGCTC	Background
CID44041_TCTTCGGCACCCATTC	Background
CID44041_TGGCCAGAGGCTAGAC	Background
CID44041_TGGTTAGCACCGCTAG	Background
CID44041_CAAGAAACAATGAAAC	Background
CID44041_AAGTCTGAGGGCTCTC	Background
CID44041_ACGATGTAGGATATAC	Background
CID44041_CGAGAAGCAGGGATTG	Background
CID44041_CGTTGGGGTCTAGTCA	High-Risk
CID44041_GGGAGATTCAGCATGT	Background
CID44041_ACGAGCCGTCCAAGTT	Background
CID44041_AGCTCCTCAGCGTCCA	Background
CID44041_AGGCCGTAGGTGATTA	Background
CID44041_AGTTGGTCAGCGATCC	Background
CID44041_ATCTGCCGTGACAAAT	Background
CID44041_CAAGATCTCGCAAACT	Background
CID44041_CAGAATCCAGGGAGAG	Background
CID44041_CATCGAAGTTTAGCTG	Background
CID44041_CATTCGCAGGTGGGTT	Background
CID44041_CCTCAGTCACGCGAAA	Background
CID44041_CCTCTGAAGTGTTAGA	Background
CID44041_GACTGCGCACCATGTA	Background
CID44041_GATGAAAAGCTGATAA	Background
CID44041_GCTGCAGAGTATTGGA	Background
CID44041_GCTGCAGGTGGTAACG	Background
CID44041_GGAACTTGTCGCCATG	Background
CID44041_GGATGTTAGCCTATGT	Background
CID44041_GGCAATTTCGACAGCC	Background
CID44041_GGGCACTCATCACGTA	Background
CID44041_GTGCAGCCAGGCGATA	Background
CID44041_GTTTCTAAGTCTCCTC	Background
CID44041_TCAGGTAGTTCTGTTT	Background
CID44041_TCATTTGTCACCGTAA	Background
CID44041_TCGCGTTCACCGATAT	Background
CID44041_TCTGAGATCAGTTAGC	Background
CID44041_TTATGCTAGTACGCCC	Background
CID44041_TTGGCAAGTAAAGGAG	Background
CID44041_TTGTAGGAGAGTTGGC	Background
CID44041_AAACCTGCATGAACCT	Background
CID44041_AACGTTGAGCTACCTA	Background
CID44041_AACTCAGCAGGGATTG	Background
CID44041_AACTCTTGTTCCGTCT	Background
CID44041_AAGGAGCTCGGCCGAT	Background
CID44041_AAGGCAGAGCTCCCAG	Background
CID44041_ACGGGTCAGTAACCCT	Background
CID44041_ACGGGTCCAACACGCC	Background
CID44041_ACTGAACTCCTTTACA	Background
CID44041_ACTGATGAGTGGGATC	Background
CID44041_ACTGCTCAGATAGGAG	Background
CID44041_AGCAGCCAGAAAGTGG	Background
CID44041_AGGTCATCACCTTGTC	Background
CID44041_ATAACGCAGATCCTGT	Background
CID44041_ATGGGAGGTAGCGTGA	Background
CID44041_ATTTCTGAGAAGAAGC	Background
CID44041_CAACCAATCTTCCTTC	Background
CID44041_CAACCTCCAGCGTAAG	Background
CID44041_CAAGATCTCTGACCTC	Background
CID44041_CACATAGTCTGGTGTA	Background
CID44041_CACCTTGTCTTCGAGA	Background
CID44041_CAGAATCAGGGTCTCC	Background
CID44041_CAGCATATCCAATGGT	Background
CID44041_CATATTCCATGCCCGA	Background
CID44041_CCACCTAGTCAACTGT	Background
CID44041_CCTCAGTGTTCCGGCA	Background
CID44041_CGAACATGTGTTGAGG	Background
CID44041_CGCGTTTTCCAAATGC	Background
CID44041_CGCTATCGTCGTCTTC	Background
CID44041_CGGCTAGGTGACTACT	Background
CID44041_CTCGAGGGTCAATACC	Background
CID44041_CTGATCCCAGGCGATA	Background
CID44041_CTGCCTAAGCTTTGGT	Background
CID44041_CTGCTGTGTGTTTGGT	Background
CID44041_CTTAGGATCCAATGGT	Background
CID44041_GCATGCGAGGACAGAA	Background
CID44041_GCTCTGTGTGACTACT	Background
CID44041_GGACAAGAGTTCGCAT	Background
CID44041_GGACGTCTCCCACTTG	Background
CID44041_GGCGACTCACAAGCCC	Background
CID44041_GGGAGATTCCTAGGGC	Background
CID44041_GGGCACTGTGTAAGTA	Background
CID44041_GTAACGTGTCTAAACC	Background
CID44041_GTGTTAGAGCGATTCT	Background
CID44041_TAGCCGGTCTGTCAAG	Background
CID44041_TAGTTGGTCTATGTGG	Background
CID44041_TATCTCAAGGCATGGT	Background
CID44041_TCAACGAAGCCACGCT	Background
CID44041_TCGAGGCTCACATACG	Background
CID44041_TCGTACCCACGAAATA	Background
CID44041_TCTGGAAGTCGCGGTT	Background
CID44041_TCTTCGGCAGCTTCGG	Background
CID44041_TGAGGGACAAGGCTCC	Background
CID44041_TGCCCTATCGATCCCT	Background
CID44041_TGCGCAGAGCGAAGGG	Background
CID44041_TGCGTGGCATCACGTA	Background
CID44041_TGCGTGGTCGGCCGAT	Background
CID44041_TGTGGTAGTCTCCCTA	Background
CID44041_TGTGTTTTCTACTTAC	Background
CID44041_TTCTACATCTGGTTCC	Background
CID44041_TTCTCAACACTGTCGG	Background
CID44041_AAACGGGAGTGTCCCG	Background
CID44041_AGAGTGGGTTACGGAG	Background
CID44041_ATCATCTTCAACGGCC	Background
CID44041_CTGATCCCAAGCTGTT	Background
CID44041_GTGGGTCGTAACGCGA	Background
CID44041_GTTACAGCACAGATTC	Background
CID44041_TTTATGCGTAATAGCA	Background
CID44041_AACACGTTCACCTTAT	Background
CID44041_AACGTTGAGTTAGGTA	Background
CID44041_ACAGCCGTCCGTAGTA	Background
CID44041_ACCAGTATCTTTCCTC	Background
CID44041_ACTGTCCCACACAGAG	Background
CID44041_AGCCTAAAGATCGATA	Background
CID44041_AGTGGGACACCCTATC	Background
CID44041_AGTGTCATCGTTGACA	Background
CID44041_ATAACGCCAAAGCAAT	Background
CID44041_ATCCGAACACCAACCG	Background
CID44041_ATGTGTGAGATGAGAG	Background
CID44041_CAACCAATCGTCCGTT	Background
CID44041_CACCTTGGTAATAGCA	Background
CID44041_CAGTCCTGTCACTGGC	Background
CID44041_CAGTCCTGTTCCCGAG	Background
CID44041_CCGTACTCACTTGGAT	Background
CID44041_CCTATTATCTCCAGGG	Background
CID44041_CGGGTCAGTGGACGAT	Background
CID44041_CTAGTGATCTGCTGCT	Background
CID44041_CTCGTACTCGACCAGC	Background
CID44041_CTCTGGTTCTTCATGT	Background
CID44041_CTTCTCTTCCGCATCT	Background
CID44041_GAAATGAAGTGCTGCC	Background
CID44041_GAAGCAGGTGACCAAG	Background
CID44041_GACGTTATCGACCAGC	Background
CID44041_GATCGTATCTCTTATG	Background
CID44041_GCCTCTAAGGCTCAGA	Background
CID44041_GCGCCAACAGGAATGC	Background
CID44041_GGAACTTCACAGCCCA	Background
CID44041_GGGATGAAGGTGATAT	Background
CID44041_GTACGTACAATCACAC	Background
CID44041_GTGCTTCGTCGAGTTT	Background
CID44041_TAAGTGCTCCAATGGT	Background
CID44041_TACGGGCCATGTTGAC	Background
CID44041_TCAGGTAAGTGAACAT	Background
CID44041_TGCCCATAGCGTTTAC	Background
CID44041_TGCGGGTTCCGCAAGC	Background
CID44041_TGTGTTTAGGATGTAT	Background
CID44041_TTCTTAGAGCTACCGC	Background
CID44041_TTGAACGAGACTAAGT	Background
CID44041_TTGGCAACAGCATACT	Background
CID44041_AAACCTGAGCACACAG	Background
CID44041_AAGACCTTCCGCGCAA	Background
CID44041_ACCCACTTCAACGAAA	Background
CID44041_ACGAGGAAGATGTAAC	Background
CID44041_ACTGCTCAGTAGTGCG	Background
CID44041_ATAACGCGTCTAAAGA	Background
CID44041_ATCCGAACAAGCCGCT	Background
CID44041_ATGGGAGTCGAGAACG	Background
CID44041_CACAAACTCCGAGCCA	Background
CID44041_CAGCATAAGAGCCCAA	Background
CID44041_CATCAGATCTAAGCCA	Background
CID44041_CCCTCCTTCCGTAGTA	Background
CID44041_CCTACACGTTCTGGTA	Background
CID44041_CCTACACTCACATACG	Background
CID44041_CGGACGTTCCTGTAGA	Background
CID44041_CGTCAGGAGGGTATCG	Background
CID44041_CGTTCTGAGCCACCTG	Background
CID44041_CTCACACTCAATCACG	Background
CID44041_CTCTACGGTACTTGAC	Background
CID44041_CTGCCTATCAGTCAGT	Background
CID44041_CTTAGGAGTATCTGCA	Background
CID44041_GACTACAGTCAGAATA	Background
CID44041_GATGAAAAGGGATGGG	Background
CID44041_GATGCTAAGCCGCCTA	Background
CID44041_GCTGGGTCACGGTTTA	Background
CID44041_GCTGGGTGTGCAGGTA	Background
CID44041_GGACGTCCAGACGCAA	Background
CID44041_GGTGTTAGTAGCAAAT	Background
CID44041_GTAGGCCTCGGAGGTA	Background
CID44041_GTTAAGCAGAACAATC	Background
CID44041_GTTAAGCAGACAAAGG	Background
CID44041_TAGTGGTCAGGTCCAC	Background
CID44041_TAGTGGTGTAAACACA	Background
CID44041_TATTACCCAGGGAGAG	Background
CID44041_TCAACGATCGTCACGG	Background
CID44041_TCGTAGATCAGTCCCT	Background
CID44041_TCTTTCCCAAAGTCAA	Background
CID44041_TGGCTGGCAGACGTAG	Background
CID44041_TTTCCTCAGTTAGGTA	Background
CID44041_ATCGAGTCATGACGGA	Background
CID44041_TCAGATGTCTAACGGT	Background
CID44041_ACAGCCGCAGGTCGTC	Background
CID44041_ACGAGCCCAGATAATG	Background
CID44041_ACGCCAGAGTGAACAT	Background
CID44041_ACTGAACAGTGTTGAA	Background
CID44041_AGAGCGAAGCCGGTAA	Background
CID44041_AGCGGTCAGAGCAATT	Background
CID44041_AGCGGTCTCTACCAGA	Background
CID44041_CACAAACCAAAGGCGT	Background
CID44041_CACACAAAGGATATAC	Background
CID44041_CACACAATCCTTGCCA	Background
CID44041_CACAGGCGTGCAACGA	Background
CID44041_CAGTAACGTCGGCATC	Background
CID44041_CATCAGAAGGTTACCT	Background
CID44041_CCACGGATCCTTTCTC	Background
CID44041_CCCAGTTCAAGCGATG	Background
CID44041_CCTCTGATCTTGCATT	Background
CID44041_CGAACATTCGAGAACG	Background
CID44041_CGCTATCCATGCTGGC	Background
CID44041_CGTGTCTAGAGTACAT	Background
CID44041_GAGGTGAAGCGTGAAC	Background
CID44041_GCGCAACCATGCTGGC	Background
CID44041_GCGCAGTTCCAACCAA	Background
CID44041_GCGGGTTGTGCATCTA	Background
CID44041_GCTGGGTTCCCTCTTT	Background
CID44041_GGCTCGATCACAACGT	Background
CID44041_GGTGTTAAGCTAACAA	Background
CID44041_GTATCTTCATCCGCGA	Background
CID44041_GTCTTCGAGGGAGTAA	Background
CID44041_TACACGAAGTATCTCG	Background
CID44041_TAGAGCTCAGCCTGTG	Background
CID44041_TCAACGATCTAACCGA	Background
CID44041_TCCCGATGTTCGGCAC	Background
CID44041_TCGAGGCGTCTTTCAT	Background
CID44041_TGCGCAGGTCCATCCT	Background
CID44041_TGCGGGTGTCCGACGT	Background
CID44041_TGGACGCCATGCTGGC	Background
CID44041_TTATGCTTCTCGAGTA	Background
CID44041_TTTGGTTCACCACGTG	Background
CID44041_TTTGTCAAGTGTGGCA	Background
CID44041_CATGGCGTCGGCTTGG	Background
CID44041_CCTATTAAGAAGGCCT	Background
CID44041_TCAACGAGTTCGGCAC	Background
CID44041_AACGTTGTCTAAGCCA	Background
CID44041_AAGGTTCAGAAGGCCT	Background
CID44041_ACATGGTTCCTAGAAC	Background
CID44041_ACTGAGTAGTTCCACA	Background
CID44041_AGATCTGGTTTAGCTG	Background
CID44041_AGTGGGAGTTCCACTC	Background
CID44041_ATAAGAGAGTAAGTAC	Background
CID44041_ATCACGAAGACCGGAT	Background
CID44041_CAAGAAACATAAAGGT	Background
CID44041_CATCAAGAGTAAGTAC	Background
CID44041_CCGGGATAGAAACCGC	Background
CID44041_CCTATTATCATTATCC	Background
CID44041_CCTCAGTCAGCCTTTC	Background
CID44041_CGGACGTGTGAGGCTA	Background
CID44041_CTACATTGTCTGGAGA	Background
CID44041_CTGATCCTCTACTCAT	Background
CID44041_CTTAACTCAGACGCAA	Background
CID44041_GAAATGAAGCAGCGTA	Background
CID44041_GATCGTACATGCATGT	Background
CID44041_GGTGCGTGTGCACCAC	Background
CID44041_TACAGTGTCATGCTCC	Background
CID44041_TCTGAGACAAACAACA	Background
CID44041_TGCACCTTCACAGTAC	Background
CID44041_TGCGGGTTCACGCATA	Background
CID44041_TGGTTCCGTCTCTCGT	Background
CID44041_TGTGTTTGTCAAAGCG	Background
CID44041_TTATGCTAGTGTACGG	Background
CID44041_TTGGCAACATCAGTCA	Background
CID44041_ACATGGTAGACTCGGA	Background
CID44041_CCTAGCTGTCTTGCGG	Background
CID44041_CGATTGAAGGCCGAAT	Background
CID44041_TAAGAGAGTGTAACGG	Background
CID44041_TGGGCGTGTGATGTGG	Background
CID44041_ACGCCAGCACGTCAGC	Background
CID44041_GGCAATTTCCAGTAGT	Background
CID44041_AACCATGCACCAACCG	Background
CID44041_ACATACGAGCTTCGCG	Background
CID44041_AGACGTTCAGCGTTCG	Background
CID44041_CAAGATCAGCTCTCGG	Background
CID44041_CATCGGGCAGTATGCT	Background
CID44041_CCTTCCCGTTGGTGGA	Background
CID44041_CTTAGGACAGGAACGT	Background
CID44041_TCGCGAGCATCTACGA	Background
CID44041_TTATGCTCACAGGAGT	Background
CID44041_TTGCCGTAGTCATGCT	Background
CID44041_TTGTAGGCAGTCCTTC	Background
CID44041_AACTCTTAGGTGACCA	Background
CID44041_AGAGTGGTCCTCGCAT	Background
CID44041_CAACCTCAGTCCGTAT	Background
CID44041_CGGAGTCTCCAGATCA	Background
CID44041_GACGGCTGTTCATGGT	Background
CID44041_GTAACGTTCGGTTCGG	Background
CID44041_TCAACGAAGGCTAGCA	Background
CID44041_CATGGCGCAAGGTTCT	Background
CID44041_CTCTACGGTTAAGGGC	Background
CID44041_CTGTGCTGTCCTGCTT	Background
CID44041_GACGGCTGTACGAAAT	Background
CID44041_GGACAAGCAGGGCATA	Background
CID44041_GGACATTCAAGAAAGG	Background
CID44041_TGTTCCGGTGCAGGTA	Background
CID44041_CAGCTGGGTCTCTCTG	Background
CID44041_CGCTGGAGTATCACCA	Background
CID44041_GAAATGAGTGCATCTA	Background
CID44041_GCCTCTATCGCCTGTT	Background
CID44041_GCGAGAAAGGATATAC	Background
CID44041_GGGTCTGCATCACCCT	Background
CID44041_AACTCCCTCTGCCCTA	Background
CID44041_AAGACCTTCCGTCATC	Background
CID44041_AAGGCAGCAGTGACAG	Background
CID44041_ACGATACTCATCTGCC	Background
CID44041_ACGGCCACATAGAAAC	Background
CID44041_ATAACGCTCTGTCTCG	Background
CID44041_ATCTGCCAGTGCGTGA	Background
CID44041_ATGGGAGAGAGGACGG	Background
CID44041_ATTGGTGCACATTTCT	Background
CID44041_CAGCCGATCTCCAGGG	Background
CID44041_CAGCTAATCTGTACGA	Background
CID44041_CAGCTGGCACCGGAAA	Background
CID44041_CATCAGACATGTCTCC	Background
CID44041_CATGACACATTTCACT	Background
CID44041_CATTCGCAGGAGTAGA	Background
CID44041_CCAATCCTCCAGGGCT	Background
CID44041_CCAGCGATCCCTTGTG	Background
CID44041_CCATTCGCAGATCGGA	Background
CID44041_CCCATACCACGAGGTA	Background
CID44041_CCGTACTAGCGATCCC	Background
CID44041_CCTACCACACTCTGTC	Background
CID44041_CGAGCCACACTTGGAT	Background
CID44041_CGCTGGACACAGAGGT	Background
CID44041_CGGACTGCAATGAAAC	Background
CID44041_CTAATGGAGGTGCTTT	Background
CID44041_CTCTACGGTCGCCATG	Background
CID44041_CTCTGGTTCCAAAGTC	Background
CID44041_CTTCTCTAGGTGATTA	Background
CID44041_GATTCAGAGACACTAA	Background
CID44041_GCAGCCATCTTCATGT	Background
CID44041_GCGCCAAGTAAGTGTA	Background
CID44041_GCGCCAAGTTGTCGCG	Background
CID44041_GCGCGATCAGGATTGG	Background
CID44041_GCTGGGTTCCGCGTTT	Background
CID44041_GCTTCCATCATAGCAC	Background
CID44041_GGACGTCGTCGCGGTT	Background
CID44041_GGCGACTGTGCGGTAA	Background
CID44041_GGCGTGTTCGCGGATC	Background
CID44041_GTAACTGTCCTAGGGC	Background
CID44041_GTCAAGTAGCTGTCTA	Background
CID44041_GTCGGGTTCACAGGCC	Background
CID44041_GTCTTCGGTCTGGTCG	Background
CID44041_TAGGCATGTCTTCTCG	Background
CID44041_TCACGAATCACATGCA	Background
CID44041_TCTGAGATCCACGACG	Background
CID44041_TCTGGAATCAACACTG	Background
CID44041_TGAGGGACAGTGACAG	Background
CID44041_TGCCAAAAGTATTGGA	Background
CID44041_TGCTGCTTCACTTATC	Background
CID44041_TTGAACGGTATATGGA	Background
CID44041_TTGCGTCTCCTCCTAG	Background
CID44041_AGCGTATCACGAGAGT	Background
CID44041_ATGAGGGTCCGCGTTT	Background
CID44041_CATGCCTAGCCGCCTA	Background
CID44041_CGCTATCGTGGTAACG	Background
CID44041_CTAGCCTTCGTTACAG	Background
CID44041_CTGATAGCACCCAGTG	Background
CID44041_TCAGCTCAGGGTCTCC	Background
CID44041_TCCCGATGTCAGAATA	Background
CID44041_TGGACGCTCCAAGCCG	Background
CID44041_TGGGCGTCAATGGATA	Background
CID44041_ACTTTCAAGGCATGTG	Background
CID44041_CACACCTGTCAACATC	Background
CID44041_CACACTCTCGCCCTTA	Background
CID44041_GACGTGCCAAGACGTG	Background
CID44041_GGGCATCAGTTAGCGG	Background
CID44041_GCAGCCAGTAGTACCT	Background
CID44041_CGTAGCGGTGTGCCTG	Background
CID44041_CTACACCCAGCTCGAC	Background
CID44041_CTTAGGATCCTTGGTC	Background
CID44041_CTCGAGGGTTTGTGTG	Background
CID44041_GCCTCTAAGTCCTCCT	Background
CID44041_GGTGTTAGTACCGTAT	Background
CID44041_ATCCGAAGTTACGTCA	Background
CID44041_CAGGTGCGTGCAACGA	Background
CID44041_CATCAGAGTGGTCCGT	Background
CID44041_GTATTCTGTAGCACGA	Background
CID44041_GTTAAGCAGAGGGCTT	Background
CID44041_TGGGAAGGTGTGGCTC	Background
CID44041_TTCTTAGTCACGATGT	Background
CID44041_GGAATAACAAGACGTG	Background
CID44041_TCAGCAAGTACCCAAT	Background
CID44041_CTTAGGAGTCGAACAG	Background
CID44041_TGTGTTTCAATCTGCA	Background
CID44041_AACCATGGTGCACGAA	Background
CID44041_CGAGCCAGTCTTCTCG	Background
CID44041_CGATGTACATGGGACA	Background
CID44041_CTGATCCTCTTAGCCC	Background
CID44041_GGGCATCAGACAAGCC	Background
CID44041_TATCAGGGTGCAGTAG	Background
CID44041_TCAACGACATCAGTAC	Background
CID44041_TCTGAGAGTTCCAACA	Background
CID44041_TGGCGCACACCATGTA	Background
CID44041_GGATGTTGTTCTGGTA	Background
CID44041_TCGGTAAAGCTGATAA	Background
CID44041_AACTTTCGTCAGCTAT	Background
CID44041_ACACTGACACCAGCAC	Background
CID44041_CGTCAGGCACATTCGA	Background
CID44041_AACGTTGCATCATCCC	Background
CID44041_CTAGCCTCACGCTTTC	Background
CID44041_TTAGGACCACCAACCG	Background
CID44041_AACACGTGTAAGAGGA	Background
CID44041_AACGTTGGTAGAGTGC	Background
CID44041_ACACCGGGTTTAGCTG	Background
CID44041_ACGATACAGTGATCGG	Background
CID44041_ACTGCTCCAGGTCGTC	Background
CID44041_ACTTGTTTCGTAGATC	Background
CID44041_AGGCCGTGTCATGCCG	Background
CID44041_AGTGGGAGTCACTTCC	Background
CID44041_ATCACGAGTTACCGAT	Background
CID44041_ATTATCCAGATCTGAA	Background
CID44041_CCACGGACAATGCCAT	Background
CID44041_CCCAATCTCATGTCTT	Background
CID44041_CCGTGGAAGGCGACAT	Background
CID44041_CCTACACTCAACACTG	Background
CID44041_CCTTACGAGGGTGTTG	Background
CID44041_CGAGAAGTCTCGTTTA	Background
CID44041_CGATCGGAGTACGCCC	Background
CID44041_CGCGGTACATTTGCCC	Background
CID44041_CTAATGGTCCAGTAGT	Background
CID44041_CTAGAGTCACTGCCAG	Background
CID44041_CTCATTACAGGGAGAG	Background
CID44041_CTCTGGTGTCTCCATC	Background
CID44041_GAAATGAGTTGCGTTA	Background
CID44041_GACGTGCAGTGTACTC	Background
CID44041_GATGAGGGTAGCAAAT	Background
CID44041_GATTCAGCAGCATGAG	Background
CID44041_GCAAACTAGGCGATAC	Background
CID44041_GCACTCTAGTCAATAG	Background
CID44041_GCATGATTCGTCCGTT	Background
CID44041_GGAAAGCAGGAGCGTT	Background
CID44041_GGCTCGAAGAAACGCC	Background
CID44041_GTAACGTGTTTAAGCC	Background
CID44041_GTAGGCCAGCGCCTCA	Background
CID44041_GTAGGCCGTAAGTGGC	Background
CID44041_GTATCTTGTCTCGTTC	Background
CID44041_GTCGTAACAACCGCCA	Background
CID44041_TACTTGTTCTGGCGAC	Background
CID44041_TCAATCTGTGAGTGAC	Background
CID44041_TCAGATGAGTAGCGGT	Background
CID44041_TCAGCAACAGGAACGT	Background
CID44041_TCATTTGTCAACTCTT	Background
CID44041_TCTGGAACAAACTGTC	Background
CID44041_TCTGGAACATGTTGAC	Background
CID44041_TGAAAGAAGAATGTTG	Background
CID44041_TGCTACCTCTCCGGTT	Background
CID44041_TGGCTGGTCGAGAACG	Background
CID44041_TGTCCCAAGGAATCGC	Background
CID44041_TTAGGCATCGCGTTTC	Background
CID44041_TTGCGTCGTCTCCATC	Background
CID44041_AATCCAGCACTGTCGG	Background
CID44041_ACATACGGTCTCCACT	Background
CID44041_ACTTACTTCTTAGAGC	Background
CID44041_CACACCTAGGCTCAGA	Background
CID44041_CTACGTCGTCTTGCGG	Background
CID44041_CGGTTAACAATGTTGC	Background
CID44041_GTCTCGTCAGCCAGAA	Background
CID44041_TCCCGATAGTACTTGC	Background
CID44041_ACGAGCCTCTCTTATG	Background
CID44041_CGGTTAAGTCTTTCAT	Background
CID44041_GCGCGATGTATGGTTC	Background
CID44041_TCAGGTAAGCTTATCG	Background
CID44041_CGTTAGAGTTCGAATC	Background
CID44041_AACTCTTAGCATGGCA	Background
CID44041_CGGACTGAGATCGGGT	Background
CID44041_GAGTCCGGTCTTGTCC	Background
CID44041_TCGGGACTCCAAAGTC	Background
CID44041_TTTACTGAGAATGTTG	Background
CID44041_CCCTCCTGTCTAGCGC	Background
CID44041_GACCTGGGTAGAGTGC	Background
CID44041_AAGGTTCTCACAGGCC	Background
CID44041_CATTCGCTCTTGAGAC	Background
CID44041_CTACACCGTAGGGTAC	Background
CID44041_TACCTATTCCTAGTGA	Background
CID44041_GACACGCAGTCCATAC	Background
CID44041_ATCCGAAGTCGCTTTC	Background
CID44041_GACAGAGCAAGACACG	Background
CID44041_AACTCCCTCCGTCAAA	Background
CID44041_AAGGAGCGTCAGAGGT	Background
CID44041_AAGGAGCTCTAAGCCA	Background
CID44041_AAGGTTCAGGGTTTCT	Background
CID44041_AATCGGTAGCCGTCGT	Background
CID44041_ACATACGAGACTTGAA	Background
CID44041_ACCCACTCACGAAGCA	Background
CID44041_ACTTACTCATAGACTC	Background
CID44041_ACTTTCATCCATGCTC	Background
CID44041_AGGTCATCATGGAATA	Background
CID44041_AGGTCCGTCGGAGGTA	Background
CID44041_ATAAGAGCAACACGCC	Background
CID44041_CAGCAGCAGCGCTTAT	Background
CID44041_CAGCCGAAGTGCCATT	Background
CID44041_CAGCCGAGTATGCTTG	Background
CID44041_CATATTCCATCACAAC	Background
CID44041_CCAATCCAGCCGCCTA	Background
CID44041_CCACGGATCTGTTGAG	Background
CID44041_CCCTCCTTCTTACCGC	Background
CID44041_CCGGTAGGTAGCTGCC	Background
CID44041_CCTACACCACGGCCAT	Background
CID44041_CCTCTGAGTCTCTTTA	Background
CID44041_CCTTCGAGTATAGGTA	Background
CID44041_CGAACATCAAGCCATT	Background
CID44041_CGAACATGTTATTCTC	Background
CID44041_CGACCTTTCAGCGACC	Background
CID44041_CGAGAAGAGCTAGTCT	Background
CID44041_CGATGGCTCCCTTGCA	Background
CID44041_CGATGTAGTACCGGCT	Background
CID44041_CGCGTTTTCCTCGCAT	Background
CID44041_CGCTGGAGTCGGCTCA	Background
CID44041_CGGAGTCAGCCCAGCT	Background
CID44041_CGTAGCGAGGACAGAA	Background
CID44041_CGTAGGCAGAAGGTGA	Background
CID44041_CGTCTACCATATGGTC	Background
CID44041_CTAACTTAGTGTACCT	Background
CID44041_CTAATGGAGATCCTGT	Background
CID44041_CTCGGAGCAGATCTGT	Background
CID44041_CTCGGAGCATAAGACA	Background
CID44041_CTCTAATAGTACTTGC	Background
CID44041_CTGATCCAGAATCTCC	Background
CID44041_CTGGTCTGTATAGGGC	Background
CID44041_CTGTGCTCAGATTGCT	Background
CID44041_CTTAGGAAGTGAACGC	Background
CID44041_GAACATCGTCGCATAT	Background
CID44041_GAAGCAGCATCCGTGG	Background
CID44041_GACGCGTAGATGGCGT	Background
CID44041_GAGTCCGCATGCATGT	Background
CID44041_GATGCTATCATAACCG	Background
CID44041_GCAAACTAGTGCCATT	Background
CID44041_GCAGCCAGTCGCTTCT	Background
CID44041_GCATGTAGTATTAGCC	Background
CID44041_GCCAAATAGCCGCCTA	Background
CID44041_GCGCAGTAGAAGGACA	Background
CID44041_GCTGCAGTCATCTGCC	Background
CID44041_GCTGCAGTCTGCGTAA	Background
CID44041_GCTGCTTTCCCGACTT	Background
CID44041_GGACGTCCATTCACTT	Background
CID44041_GGTGTTAGTAGGAGTC	Background
CID44041_GTAACTGAGCACGCCT	Background
CID44041_GTACGTACATGCCTTC	Background
CID44041_GTGTGCGAGTGTGGCA	Background
CID44041_TAAACCGCAAGTTGTC	Background
CID44041_TAAGCGTTCCGAGCCA	Background
CID44041_TACAGTGCATCCTTGC	Background
CID44041_TACCTTAGTCTGATTG	Background
CID44041_TAGCCGGTCTGAGTGT	Background
CID44041_TCAGCTCGTTGTTTGG	Background
CID44041_TCTGAGAAGGCAGTCA	Background
CID44041_TGAGCATTCATGTGGT	Background
CID44041_TGCCAAAGTCATCCCT	Background
CID44041_TGCCCTAGTCGAAAGC	Background
CID44041_TGCGTGGCAAACAACA	Background
CID44041_TGGGCGTGTAAGTTCC	Background
CID44041_TGGTTCCAGAAGGGTA	Background
CID44041_TTAACTCTCGCCCTTA	Background
CID44041_TTAGGCATCACTATTC	Background
CID44041_TTGCGTCAGGCAGGTT	Background
CID44041_TGAAAGATCGTTACGA	Background
CID44041_AAAGATGGTCTCACCT	Background
CID44041_AAAGTAGTCGGCGGTT	Background
CID44041_AACACGTAGGAACTGC	Background
CID44041_AACTTTCCAGGGTTAG	Background
CID44041_ACCCACTAGACGCTTT	Background
CID44041_ACCGTAATCCTTAATC	Background
CID44041_ACTGAACGTCTCGTTC	Background
CID44041_AGCAGCCTCTGATACG	Background
CID44041_AGCATACTCACCCGAG	Background
CID44041_AGTCTTTAGATGCCTT	Background
CID44041_ATAGACCCAATACGCT	Background
CID44041_ATCTGCCCACAGGTTT	Background
CID44041_ATGAGGGGTTCTCATT	Background
CID44041_ATGGGAGTCCGTTGTC	Background
CID44041_ATTGGTGCAGGGTTAG	Background
CID44041_CACATAGGTCTCCATC	Background
CID44041_CACCACTGTCCGAGTC	Background
CID44041_CAGCAGCGTTGCTCCT	Background
CID44041_CAGCTAAGTAAGAGAG	Background
CID44041_CATCAAGGTAGAAGGA	Background
CID44041_CATCAGACAAACTGTC	Background
CID44041_CCAGCGAAGCCAGGAT	Background
CID44041_CCAGCGACACAGGTTT	Background
CID44041_CCCAATCAGCGATCCC	Background
CID44041_CCTACACGTGAGGCTA	Background
CID44041_CCTCTGAAGCGTGAAC	Background
CID44041_CCTTCCCGTGTTCTTT	Background
CID44041_CGAGCACAGGACATTA	Background
CID44041_CGGACACGTCTCACCT	Background
CID44041_CTACACCAGAGAACAG	Background
CID44041_CTCGAAAGTTACTGAC	Background
CID44041_CTCGAAATCACAATGC	Background
CID44041_CTCGGGACATACCATG	Background
CID44041_CTGATAGCACACATGT	Background
CID44041_GAAGCAGTCTGGAGCC	Background
CID44041_GACAGAGTCCTAGGGC	Background
CID44041_GACGGCTCATCAGTCA	Background
CID44041_GCATACAAGCGTTTAC	Background
CID44041_GCATACAAGCTGCGAA	Background
CID44041_GCGCAGTGTTGTACAC	Background
CID44041_GGACATTTCCGAACGC	Background
CID44041_GGCTCGACACTTCGAA	Background
CID44041_GGTGTTAAGGACATTA	Background
CID44041_GTCGGGTTCGTCGTTC	Background
CID44041_GTCTTCGCATTTCACT	Background
CID44041_GTGCGGTTCGCATGAT	Background
CID44041_GTGGGTCGTAGGGTAC	Background
CID44041_GTTCATTAGATGGGTC	Background
CID44041_TACCTATTCGAGAGCA	Background
CID44041_TATCAGGGTATCGCAT	Background
CID44041_TATGCCCTCGCTGATA	Background
CID44041_TCTCTAATCCAAAGTC	Background
CID44041_TGACGGCTCTGCCAGG	Background
CID44041_TGACTAGGTTGGGACA	Background
CID44041_TGCCAAAGTGTTTGGT	Background
CID44041_TGCGTGGGTTTGTTTC	Background
CID44041_TGCTACCCATTATCTC	Background
CID44041_TTAACTCGTACTTAGC	Background
CID44041_TTAGGACGTCCGAAGA	Background
CID44041_TTGAACGAGATTACCC	Background
CID44041_CCTTACGGTTACGCGC	Background
CID44041_GCGAGAATCAGTCCCT	Background
CID44041_GGTGCGTTCGTCGTTC	Background
CID44041_TTCGAAGAGACAATAC	Background
CID44041_AAAGATGCATCAGTAC	Background
CID44041_AAGGAGCCACCAGTTA	Background
CID44041_ACACCAAAGGTACTCT	Background
CID44041_ACACCAACAAGTCATC	Background
CID44041_ACCAGTAAGTTAGGTA	Background
CID44041_ACGCCAGCATATGAGA	Background
CID44041_ACGCCGACATGCCACG	Background
CID44041_ACTTGTTCAAACTGCT	Background
CID44041_AGAATAGTCTGCAGTA	Background
CID44041_AGGCCACCACCTCGTT	Background
CID44041_AGGGTGAGTGCACCAC	Background
CID44041_ATCACGAGTACTTAGC	Background
CID44041_ATGTGTGGTAATCACC	Background
CID44041_CAACCTCGTGTCGCTG	Background
CID44041_CAACTAGCAAGACACG	Background
CID44041_CAAGGCCCAGAGTGTG	Background
CID44041_CACAAACCAGATGGGT	Background
CID44041_CATGGCGCAGCATACT	Background
CID44041_CCCAATCCATGAACCT	Background
CID44041_CGATGTATCGTGGGAA	Background
CID44041_CGTTCTGCAGCCAGAA	Background
CID44041_CTACGTCTCAGGCAAG	Background
CID44041_CTCTACGTCACCCTCA	Background
CID44041_GGGACCTAGCATCATC	Background
CID44041_GGTGCGTTCCTAGTGA	Background
CID44041_GTAACGTCATCTACGA	Background
CID44041_TAGACCATCCAAATGC	Background
CID44041_TATCTCATCAGTGTTG	Background
CID44041_TCAACGAGTAGCGCTC	Background
CID44041_TCAACGATCGCAGGCT	Background
CID44041_TCGGTAAGTCTGGTCG	Background
CID44041_TCTCATAAGCACAGGT	Background
CID44041_TGACTTTAGCCAGGAT	Background
CID44041_TGCGGGTTCCAACCAA	Background
CID44041_CTCACACGTTAGAACA	Background
CID44041_CTGGTCTAGCCAGAAC	Background
CID44041_TTAGTTCCAAGTCATC	Background
CID44041_TTTACTGCACAAGCCC	Background
CID44041_CCAGCGAAGAGAGCTC	Background
CID44041_GAACATCGTAAGGATT	Background
CID44041_GAGGTGAAGCAGCGTA	Background
CID44041_GCTGCAGTCCAGAAGG	Background
CID44041_TACCTATGTTGGTAAA	Background
CID44041_AGCGGTCCAGACGCCT	Background
CID44041_CTTAACTAGTGTCTCA	Background
CID44041_GCGACCATCAACACGT	Background
CID44041_GGAACTTTCGAGGTAG	Background
CID44041_TGACTAGGTGCTAGCC	Background
CID44041_TGGCCAGTCGGATGGA	Background
CID44041_CGGACGTAGTCAAGCG	Background
CID44041_TGCCCATGTAGAGCTG	Background
CID44041_ATAGACCCATGGATGG	Background
CID44041_ACGGGTCGTTGGTTTG	Background
CID44041_AGTTGGTGTGGGTATG	Background
CID44041_ATCATGGTCGGAATCT	Background
CID44041_CATTCGCAGCCAGAAC	Background
CID44041_CTAGTGATCTCTAGGA	Background
CID44041_TCAACGATCAACTCTT	Background
CID44041_TCAGCAAAGACACTAA	Background
CID44041_TGACGGCCACCACCAG	Background
CID44041_GACGTGCCATCACGAT	Background
CID44041_TCTCTAACACGTCAGC	Background
CID44041_CAGATCACACAAGACG	Background
CID44041_GCGACCATCGCTAGCG	Background
CID44041_AAAGATGTCCCAAGAT	Background
CID44041_AACTCCCCAATCAGAA	Background
CID44041_AATCGGTCATGCCTAA	Background
CID44041_ACATACGAGGGTTTCT	Background
CID44041_ACGATGTTCGTCTGAA	Background
CID44041_ACGCCAGAGAGTTGGC	Background
CID44041_ACGGAGACAAGGTGTG	Background
CID44041_AGAGCGAAGATGGCGT	Background
CID44041_AGATCTGTCATCATTC	Background
CID44041_AGCTTGAAGGCTAGGT	Background
CID44041_AGGGATGCAGTACACT	Background
CID44041_AGGGATGGTAGCTCCG	Background
CID44041_AGGGATGGTCCGTCAG	Background
CID44041_AGGGTGAAGGGTGTGT	Background
CID44041_AGTCTTTGTAGTAGTA	Background
CID44041_AGTCTTTTCTTATCTG	Background
CID44041_AGTGAGGAGCGATGAC	Background
CID44041_AGTGTCATCAGCAACT	Background
CID44041_AGTTGGTTCGTTACGA	Background
CID44041_ATCATCTCAGACGTAG	Background
CID44041_ATCATCTGTGTTGAGG	Background
CID44041_ATCGAGTAGATGGCGT	Background
CID44041_ATGGGAGCACGAAATA	Background
CID44041_ATGTGTGGTTCACCTC	Background
CID44041_ATTACTCAGTTGTCGT	Background
CID44041_ATTGGACGTTATCGGT	Background
CID44041_ATTGGACTCGACAGCC	Background
CID44041_ATTGGTGAGAGACTAT	Background
CID44041_CAACCAACAGTAAGAT	Background
CID44041_CAACCAAGTACAGCAG	Background
CID44041_CACACCTAGAGAACAG	Background
CID44041_CACAGTAAGTAGGTGC	Background
CID44041_CACCACTAGATCGATA	Background
CID44041_CACCAGGTCTGGGCCA	Background
CID44041_CACTCCAAGTATTGGA	Background
CID44041_CATATGGCAGATCTGT	Background
CID44041_CCACGGAAGATGCCTT	Background
CID44041_CCGGGATAGAAGGACA	Background
CID44041_CCGGTAGGTTAAGTAG	Background
CID44041_CCTACCAAGTGGACGT	Background
CID44041_CCTTTCTAGCTGCAAG	Background
CID44041_CGACTTCCATTTCACT	Background
CID44041_CGCCAAGCACCACGTG	Background
CID44041_CGCTGGAGTGAGGGAG	Background
CID44041_CGCTGGATCGGAAACG	Background
CID44041_CGGAGCTCACGGTAGA	Background
CID44041_CGGAGTCCACCAACCG	Background
CID44041_CGGAGTCCAGCCTATA	Background
CID44041_CGTCTACCAGGACGTA	Background
CID44041_CGTGAGCAGGTGTGGT	Background
CID44041_CGTTCTGTCTTACCTA	Background
CID44041_CTAAGACCATGCCCGA	Background
CID44041_CTACACCCAAGCTGGA	Background
CID44041_CTGAAACGTGGTGTAG	Background
CID44041_CTTAGGAGTCTTGCGG	Background
CID44041_CTTGGCTTCAGAGGTG	Background
CID44041_CTTTGCGAGTGTACTC	Background
CID44041_GAACGGAGTCCGTCAG	Background
CID44041_GAATAAGGTCTACCTC	Background
CID44041_GACAGAGGTCGTTGTA	Background
CID44041_GACTAACGTAAGAGAG	Background
CID44041_GACTAACGTGGCAAAC	Background
CID44041_GACTAACTCCGATATG	Background
CID44041_GACTACAAGCTTTGGT	Background
CID44041_GAGGTGAGTATAGTAG	Background
CID44041_GAGTCCGAGTGTACGG	Background
CID44041_GATCGCGTCACATGCA	Background
CID44041_GCATGTAAGCATCATC	Background
CID44041_GCCAAATAGCGCTCCA	Background
CID44041_GCGACCAGTGTTGGGA	Background
CID44041_GCGCAGTCAGTCTTCC	Background
CID44041_GCGCGATCATCTATGG	Background
CID44041_GCGGGTTTCCAGAAGG	Background
CID44041_GCTGCAGTCGGCGCAT	Background
CID44041_GCTGCGATCGGCGCTA	Background
CID44041_GCTTGAAAGATGTTAG	Background
CID44041_GGAGCAAAGCACAGGT	Background
CID44041_GGATGTTTCCGTCATC	Background
CID44041_GGCGACTTCGCCTGAG	Background
CID44041_GGCTGGTAGATCCCAT	Background
CID44041_GGGCACTCATCGGACC	Background
CID44041_GTATCTTCAAGCCCAC	Background
CID44041_GTCTTCGTCACCCTCA	Background
CID44041_GTGCATAAGCTAAGAT	Background
CID44041_GTTAAGCTCGCCGTGA	Background
CID44041_TACAGTGGTACCGGCT	Background
CID44041_TACTCGCGTTCAGACT	Background
CID44041_TATCAGGAGCTGAAAT	Background
CID44041_TATCAGGCATCTCGCT	Background
CID44041_TATGCCCAGAGCTGCA	Background
CID44041_TCAGCAAGTCGCGAAA	Background
CID44041_TCGTACCCATCGATTG	Background
CID44041_TCTTCGGGTGAACCTT	Background
CID44041_TGAGCCGTCGGCCGAT	Background
CID44041_TGCCCATCATCTCGCT	Background
CID44041_TGCGTGGTCCGTACAA	Background
CID44041_TGGCCAGTCACCGTAA	Background
CID44041_TGGGCGTAGCGTGTCC	Background
CID44041_TGTTCCGAGGGAGTAA	Background
CID44041_TTAGGCAAGACTTGAA	Background
CID44041_TTGAACGCACCCATGG	Background
CID44041_TTGTAGGGTCCAAGTT	Background
CID44041_CGGCTAGGTTAAGTAG	Background
CID44041_GTACTTTGTCTTTCAT	Background
CID44041_CAGCGACTCAGGCGAA	Background
CID44041_CCCAATCGTCTCATCC	Background
CID44041_CTGGTCTTCCGTTGCT	Background
CID44041_GCATGATGTGTTGAGG	Background
CID44041_GCGAGAAGTCCCTACT	Background
CID44041_GGAAAGCTCTGCGACG	Background
CID44041_ACATCAGTCACAGTAC	Background
CID44041_TTCTCCTCATTGGTAC	Background
CID44041_AGATTGCCAAAGTGCG	Background
CID44041_GTAACGTAGGGATACC	Background
CID44041_AACTCAGAGAAACGAG	Background
CID44041_AGATTGCGTACCGTTA	Background
CID44041_AGTAGTCCATGCCTAA	Background
CID44041_ATCATCTTCAAACCGT	Background
CID44041_ATCATGGGTTCCTCCA	Background
CID44041_CAGCAGCAGGACCACA	Background
CID44041_CCTACCAAGAGGTTAT	Background
CID44041_CGTTAGATCAGCTGGC	Background
CID44041_CGTTAGATCTATCGCC	Background
CID44041_GGTGTTATCCACGACG	Background
CID44041_GTATCTTTCGCAAGCC	Background
CID44041_TACTCATGTATATGAG	Background
CID44041_TATGCCCCACGGTGTC	Background
CID44041_TGCCCTATCTGATACG	Background
CID44041_TTTATGCGTTCTCATT	Background
CID44041_CAAGAAAAGTAAGTAC	Background
CID44041_CGTCAGGGTCGCTTTC	Background
CID44041_GACACGCGTAAGTAGT	Background
CID44041_GACGCGTAGGTGATTA	Background
CID44041_GCACATAGTAAGAGAG	Background
CID44041_TACGGTAAGACAGACC	Background
CID44041_TAGTGGTGTTCCACAA	Background
CID44041_ACCCACTAGAGTCGGT	Background
CID44041_CTTCTCTCATGTTGAC	Background
CID44041_GACCTGGGTCAAAGCG	Background
CID44041_GTGGGTCTCACTGGGC	Background
CID44041_TAAGAGACATGAACCT	Background
CID44041_TCGTACCTCTTGCATT	Background
CID44041_TGGTTCCGTCTCATCC	Background
CID44041_CACCAGGTCACTTACT	Background
CID44041_CTGCTGTCATTTCACT	Background
CID44041_AACCGCGAGCGATAGC	Background
CID44041_TCGCGTTGTCCCGACA	Background
CID44041_AGTTGGTTCGTGTAGT	Background
CID44041_ACACCGGGTCTGCAAT	Background
CID44041_ACGCCGACACACTGCG	Background
CID44041_CAGAGAGAGAAGCCCA	Background
CID44041_CATGACAAGGGAACGG	Background
CID44041_GGATGTTGTTCGCGAC	Background
CID44041_GGCTGGTCAGGGTACA	Background
CID44041_TACACGAAGCTGATAA	Background
CID44041_CACAGGCAGATGCCAG	Background
CID44041_AAACGGGAGGTACTCT	Background
CID44041_AACCGCGGTGCACGAA	Background
CID44041_AACTCTTCACAGAGGT	Background
CID44041_AACTGGTAGTGTACTC	Background
CID44041_AAGACCTTCGGTCTAA	Background
CID44041_AAGCCGCTCCTAGAAC	Background
CID44041_ACAGCCGCAGATCCAT	Background
CID44041_ACATGGTTCTGCAGTA	Background
CID44041_ACGTCAAAGGCAATTA	Background
CID44041_ACTGAACGTACCCAAT	Background
CID44041_ACTTGTTGTGACGCCT	Background
CID44041_AGGGATGCAACCGCCA	Background
CID44041_ATAAGAGAGTTCGATC	Background
CID44041_ATCATCTCAATCACAC	Background
CID44041_ATCTACTAGGATATAC	Background
CID44041_ATGAGGGTCTTAGCCC	Background
CID44041_CACAGGCAGACTAAGT	Background
CID44041_CAGCATAAGGTGTGGT	Background
CID44041_CAGCATAGTTGATTGC	Background
CID44041_CATCAGAGTCAGATAA	Background
CID44041_CATTATCGTAAGCACG	Background
CID44041_CCCAGTTAGGTGCTTT	Background
CID44041_CCTCTGATCCAAGTAC	Background
CID44041_CGGACTGAGTATCTCG	Background
CID44041_CGTAGGCGTCAAGCGA	Background
CID44041_CTAACTTTCAGTGTTG	Background
CID44041_CTCGGGAGTCCGACGT	Background
CID44041_CTGTGCTGTCAGGACA	Background
CID44041_GATCGATCAAGACGTG	Background
CID44041_GCCTCTAGTTGTTTGG	Background
CID44041_GCTCTGTTCTAACCGA	Background
CID44041_GCTGCAGAGAAACGAG	Background
CID44041_GGAAAGCAGCCGGTAA	Background
CID44041_GGACATTCATGAGCGA	Background
CID44041_GGACATTTCGCGCCAA	Background
CID44041_GGAGCAACAACGATCT	Background
CID44041_GGGCACTCATATACGC	Background
CID44041_GGGTTGCGTATCAGTC	Background
CID44041_GTAACGTGTTGTGGAG	Background
CID44041_GTGCGGTCATGGTAGG	Background
CID44041_GTGCGGTGTTCCACAA	Background
CID44041_TATGCCCGTGCACCAC	Background
CID44041_TCAGCAAGTAAACACA	Background
CID44041_TCGGGACTCTGTTTGT	Background
CID44041_TGAGAGGAGTGAAGAG	Background
CID44041_TTGGAACAGGCGATAC	Background
CID44041_CTAGCCTAGACAGGCT	Background
CID44041_GCTTGAAAGCGCTCCA	Background
CID44041_TTGAACGCAATGAAAC	Background
CID44041_ACACCCTCACATAACC	Background
CID44041_ACATGGTGTCGCATCG	Background
CID44041_CAAGATCAGCGTGTCC	Background
CID44041_CGTGTCTGTCTTCAAG	Background
CID44041_CTTCTCTGTGTTTGGT	Background
CID44041_GAGGTGAAGTTCGATC	Background
CID44041_GATGAGGGTGTTGGGA	Background
CID44041_GCTTCCACAGTTAACC	Background
CID44041_GTGCATACAAAGAATC	Background
CID44041_TCACGAAGTCGGCACT	Background
CID44041_TGGGCGTTCGTCTGCT	Background
CID44041_TGACGGCTCTTTCCTC	Background
CID44041_GGTGCGTGTATCGCAT	Background
CID44041_AGGGATGTCACGCATA	Background
CID44041_AGTAGTCAGGCTCATT	Background
CID44041_ATAACGCTCATCGCTC	Background
CID44041_CAACCAAAGAGTCGGT	Background
CID44041_CACAAACCACGTCTCT	Background
CID44041_CGTGTAAGTATAAACG	Background
CID44041_CTCGGGAGTTAAAGTG	Background
CID44041_CTGATCCTCCACGTGG	Background
CID44041_GACGGCTCAAGAAGAG	Background
CID44041_GCGCGATTCCGCGGTA	Background
CID44041_GGTATTGGTCCGAGTC	Background
CID44041_GTAACTGCAAACGCGA	Background
CID44041_GTACTCCAGGCGACAT	Background
CID44041_TACACGATCGGCGCAT	Background
CID44041_TACCTTAAGGCGTACA	Background
CID44041_TCACGAAAGGCCCGTT	Background
CID44041_TCTGAGATCGTCTGCT	Background
CID44041_TGCACCTTCAGCAACT	Background
CID44041_TGCCCATCATCTCCCA	Background
CID44041_GACTGCGTCAGGCAAG	Background
CID44041_CATCAAGAGTCACGCC	Background
CID44041_CATCAGACAGTAACGG	Background
CID44041_CGAGCCACACAGGAGT	Background
CID44041_GAACGGAGTCCGAGTC	Background
CID44041_AAAGCAAAGGACGAAA	Background
CID44041_AACTTTCTCCTCTAGC	Background
CID44041_AGGGAGTAGCCCAACC	Background
CID44041_CGTGAGCGTCTGATTG	Background
CID44041_GGCTGGTTCCGCGCAA	Background
CID44041_CGTAGCGAGACCTAGG	Background
CID44041_CTGTTTATCTTTACGT	Background
CID44041_GCTTGAAGTCATGCCG	Background
CID44041_TCGGGACAGACAGAGA	Background
CID44041_TCTCATAGTCATGCCG	Background
CID44041_TGCCCTATCAGTTAGC	Background
CID44041_CGCTATCTCACAGGCC	Background
CID44041_AGCAGCCAGCTCCTTC	Background
CID44041_AGGCCACGTCCAGTTA	Background
CID44041_AGGGTGAGTTTACTCT	Background
CID44041_AGTCTTTCATACCATG	Background
CID44041_ATCTACTGTACTTGAC	Background
CID44041_ATCTGCCCAGCATGAG	Background
CID44041_ATCTGCCTCCAAACAC	Background
CID44041_CAGCTGGTCAATAAGG	Background
CID44041_CCACGGAAGACCTTTG	Background
CID44041_CCTCAGTGTAGCTCCG	Background
CID44041_CCTTCCCTCTACTCAT	Background
CID44041_CGAGCACGTCCATGAT	Background
CID44041_CGCTATCTCGAACGGA	Background
CID44041_CGGCTAGAGTATCGAA	Background
CID44041_CGTTAGACAATGAAAC	Background
CID44041_CTGCGGAGTTCGTGAT	Background
CID44041_GAACCTACATGCTAGT	Background
CID44041_GATCGATTCTGACCTC	Background
CID44041_GCGAGAAGTCCGCTGA	Background
CID44041_GGCGACTCAACACCCG	Background
CID44041_GGGTTGCAGATGGCGT	Background
CID44041_TACTTGTAGTCGTACT	Background
CID44041_TGCGCAGCAGCTGCTG	Background
CID44041_TTAGGACCAAGCTGTT	Background
CID44041_TTGCCGTTCAGCGACC	Background
CID44041_TTGTAGGGTTGTCTTT	Background
CID44041_TTTGTCACATCCTTGC	Background
CID44041_ACATGGTTCATGCTCC	Background
CID44041_ACGCAGCTCGCCAAAT	Background
CID44041_CACCACTCACCTGGTG	Background
CID44041_CTTAGGATCTAACTTC	Background
CID44041_GCAGTTAAGGTGTTAA	Background
CID44041_GTATTCTGTACACCGC	Background
CID44041_GTTCTCGCAATCGAAA	Background
CID44041_TATCTCAGTCCGAATT	Background
CID44041_CCCATACAGAAGGACA	Background
CID44041_AGGGTGAGTAACGACG	Background
CID44041_CTTGGCTCAATAGCAA	Background
CID44041_GCAAACTAGTGAACAT	Background
CID44041_TCAGGATAGACCACGA	Background
CID44041_TCGGTAATCCACTGGG	Background
CID44041_CCGGTAGGTCAGAAGC	Background
CID44041_GACTGCGTCATGTCTT	Background
CID44041_CACACAATCTGCCCTA	Background
CID44041_GGACAGAAGTCATCCA	Background
CID44041_AATCGGTGTAGTAGTA	Background
CID44041_ACTTACTCACCGGAAA	Background
CID44041_CACTCCATCCGAATGT	Background
CID44041_GTAGGCCTCTCATTCA	Background
CID44041_GTATCTTGTCTAGAGG	Background
CID44041_ATCCGAAAGAAACGAG	Background
CID44041_CAGAATCAGGCGTACA	Background
CID44041_CCCTCCTGTCGACTGC	Background
CID44041_CGTTAGACACTTGGAT	Background
CID44041_CTAGTGACACTCTGTC	Background
CID44041_CTGATAGGTGTAATGA	Background
CID44041_GGGAATGGTAGAAGGA	Background
CID44041_GGGAATGTCTCTTATG	Background
CID44041_GGGATGAGTGCCTTGG	Background
CID44041_TCAGGTACAGCTTCGG	Background
CID44041_TGACAACAGAAGCCCA	Background
CID44041_ACCAGTACAAGCTGGA	Background
CID44041_CCTAAAGTCGGTGTTA	Background
CID44041_CTTCTCTTCTTGCCGT	Background
CID44041_GAATAAGGTTAAAGTG	Background
CID44041_TGACTTTAGCACAGGT	Background
CID44041_TTGCCGTTCGCGATCG	Background
CID44041_GCTGCGAAGCGTGAGT	Background
CID44041_TCACGAATCATTGCCC	Background
CID44041_CACACTCAGATCCCAT	Background
CID44041_CGATTGAAGCGAAGGG	Background
CID44041_GTATTCTCAAAGGTGC	Background
CID44041_TACTTACGTATCAGTC	Background
CID44041_TCAGGATTCACATAGC	Background
CID44041_TCATTTGTCAAACAAG	Background
CID44041_TGATTTCAGAGACTTA	Background
CID44041_AGGGTGATCACGCATA	Background
CID44041_CCTATTACATGGTAGG	Background
CID44041_GAAATGAAGCGATAGC	Background
CID44041_TTTATGCAGGCCATAG	Background
CID44041_ATCCACCCACAGATTC	Background
CID44041_CAGCGACAGCCACGTC	Background
CID44041_TCTTCGGCAGCGTAAG	Background
CID44041_CATATGGCACGAAAGC	Background
CID44041_CCACGGACAGCTTAAC	Background
CID44041_CTAGTGAAGAGGTAGA	Background
CID44041_GTAGTCAGTATATGAG	Background
CID44041_GTTAAGCGTGTCAATC	Background
CID44041_TACGGTAAGTCATGCT	Background
CID44041_TTTCCTCGTACGACCC	Background
CID44041_CATGACACATTGAGCT	Background
CID44041_TGGTTCCAGACCACGA	Background
CID44041_TTGACTTGTCTCATCC	Background
CID44041_CTGAAACGTGTGCGTC	Background
CID44041_TGCCCTATCGGCTACG	Background
CID44041_ACTTTCACAGAGTGTG	Background
CID44041_AGTGGGATCTCTAAGG	Background
CID44041_GTGGGTCGTAAACACA	Background
CID44041_TTCTCCTGTTTCCACC	Background
CID44041_AAACGGGTCTTTACAC	Background
CID44041_AGAGTGGAGGGAGTAA	Background
CID44041_CATGCCTTCGGAAATA	Background
CID44041_CCGGGATCAGGAATCG	Background
CID44041_CTTAGGAAGAAACCAT	Background
CID44041_GTCAAGTGTGTTGGGA	Background
CID44041_TCTTTCCCAAGTCTGT	Background
CID44041_TGCTACCCACGGATAG	Background
CID44041_TTGGCAAAGATATGCA	Background
CID44041_AAAGATGGTCGCATCG	High-Risk
CID44041_AAATGCCCAATGTTGC	Background
CID44041_AACTCAGCAAGCCGCT	High-Risk
CID44041_AAGGAGCGTGTCGCTG	Background
CID44041_AAGGTTCAGTGAAGAG	High-Risk
CID44041_AAGGTTCTCTCAACTT	Background
CID44041_ACACCGGAGGCCGAAT	Background
CID44041_ACACTGAGTCCGTGAC	Background
CID44041_ACATCAGAGCTAACTC	High-Risk
CID44041_ACGATACGTATCACCA	Background
[truncated: 40,513 more rows]

## Sheet: 4. Scissor Differential Genes
Gene	logfoldchanges	pvals	pvals_adj
CRIP2	2.19775	8.87354e-175	6.02809e-172
CYR61	2.22004	4.62784e-126	2.35788e-123
IGFBP7	2.13372	4.91726e-113	2.00427e-110
CALD1	1.69781	1.14191e-111	3.87869e-109
SPARC	2.05835	2.7372e-111	7.96917e-109
MDK	1.60484	7.01357e-105	1.78671e-102
TM4SF1	1.71594	3.25512e-104	7.37104e-102
EGR1	1.39263	3.02584e-88	6.16666e-86
APOD	1.9037	7.46451e-85	1.38297e-82
SPARCL1	2.18897	8.42325e-85	1.43055e-82
IGFBP5	1.98488	1.10038e-77	1.60184e-75
MYL9	1.83258	1.89035e-70	2.26619e-68
GSN	1.10355	8.69125e-65	9.84042e-63
NNMT	1.71531	2.26739e-64	2.43208e-62
MYC	1.33525	2.40017e-64	2.44578e-62
MGP	1.25717	5.65352e-63	5.4866e-61
COL1A2	1.79147	3.19154e-57	2.71015e-55
SOD3	2.17668	2.80957e-56	2.29036e-54
TIMP3	1.5679	1.25491e-55	9.8366e-54
TAGLN	1.86982	8.98066e-52	6.53664e-50
ACTA2	1.53643	3.18705e-50	2.23973e-48
IGFBP4	1.40243	6.33711e-48	4.03595e-46
COL1A1	1.48588	1.54389e-45	9.25424e-44
COL4A2	1.719	1.82273e-45	1.06135e-43
CLDN4	1.34443	4.86281e-44	2.54113e-42
COL6A2	1.53304	5.08345e-44	2.59002e-42
C1S	1.54315	5.61731e-44	2.79222e-42
DCN	2.09233	6.81224e-44	3.30556e-42
FBLIM1	1.53229	9.43791e-44	4.47313e-42
TFPI	1.85026	6.53279e-43	2.95863e-41
MYO1B	1.67524	9.78743e-43	4.33626e-41
MAP1B	1.67456	1.12436e-42	4.87544e-41
BCAM	1.37549	8.33855e-41	3.20641e-39
MFAP2	1.78602	2.34581e-40	8.85326e-39
CSRP2	1.4056	3.88238e-40	1.4386e-38
PALLD	1.27638	5.18791e-40	1.88803e-38
CTGF	1.89579	1.3528e-39	4.83686e-38
FHL2	1.53864	1.7193e-39	6.04127e-38
TMC5	2.03563	1.99885e-39	6.9045e-38
RBPMS	1.54719	4.69295e-39	1.59404e-37
BGN	1.56166	1.35757e-36	4.46247e-35
ADIRF	1.41526	2.13573e-34	6.80095e-33
PCOLCE	1.55096	3.20486e-34	1.00485e-32
BAMBI	1.557	6.88151e-34	2.12493e-32
MUCL1	1.69581	1.12855e-33	3.43283e-32
TMSB15A	1.89064	3.27436e-33	9.81346e-32
AZGP1	1.21604	7.7589e-33	2.25895e-31
PDLIM3	1.74045	1.98597e-32	5.70057e-31
CTSK	1.70809	2.74053e-32	7.75723e-31
NR2F2	1.55624	3.3029e-32	9.22098e-31
LUM	1.90898	4.09563e-32	1.12796e-30
GNG11	1.59776	4.26304e-32	1.15841e-30
COL3A1	1.43985	4.91933e-32	1.31916e-30
COL6A1	1.36694	5.69213e-32	1.50657e-30
PLPP3	1.3635	2.33351e-30	5.87122e-29
CLU	1.22334	1.8947e-29	4.59691e-28
FBLN1	1.51747	2.01017e-29	4.81968e-28
RARRES2	1.79556	5.01853e-29	1.18928e-27
PKIG	1.06859	5.43943e-29	1.2742e-27
COL18A1	1.47028	1.19391e-28	2.76499e-27
CCDC80	1.83069	1.37024e-28	3.1377e-27
LINC01285	2.08582	2.16722e-28	4.90755e-27
TFAP2B	1.71285	2.97164e-28	6.58907e-27
TPM2	1.15009	6.76811e-28	1.46738e-26
SFRP2	2.21089	6.87425e-28	1.47471e-26
TFF3	1.56643	1.13432e-27	2.38325e-26
PLAC9	2.16	2.55006e-27	5.24951e-26
MXRA8	2.13102	4.67285e-27	9.42898e-26
FRZB	2.01872	5.78718e-27	1.1563e-25
TGFB1I1	1.60292	8.8785e-27	1.75674e-25
BAG3	0.953116	1.14052e-26	2.23498e-25
ADAMTS1	1.92775	1.55599e-26	3.0201e-25
MFGE8	0.873194	9.54694e-26	1.83553e-24
COL6A3	1.45526	1.85373e-25	3.53076e-24
PTK2	1.18842	2.29781e-25	4.33606e-24
FERMT2	1.26678	3.77662e-24	6.93401e-23
THY1	1.49626	3.94346e-24	7.17569e-23
FSTL1	1.36282	9.4542e-24	1.67545e-22
SRPX	1.7184	1.57282e-23	2.76328e-22
FILIP1L	1.47428	1.71383e-23	2.98529e-22
FABP7	1.42246	2.53616e-23	4.38025e-22
KCNQ1OT1	0.937119	2.79016e-22	4.62305e-21
FHL1	1.7975	6.37261e-22	1.03899e-20
AEBP1	1.64452	1.2467e-21	1.98498e-20
CTHRC1	1.42382	1.99849e-21	3.12163e-20
C1R	1.36875	2.00654e-21	3.12163e-20
EHD2	1.6581	2.56192e-21	3.95545e-20
SERPING1	0.915308	4.06351e-21	6.22665e-20
RASD1	1.54763	4.53335e-21	6.84369e-20
PRSS23	1.13832	7.5621e-21	1.1332e-19
COL4A1	1.43517	1.06747e-20	1.57645e-19
CPE	1.44481	1.21603e-20	1.78293e-19
SFN	1.21446	1.37935e-20	2.00794e-19
ANGPTL4	1.36942	2.38296e-20	3.42006e-19
EGLN3	1.33156	5.15487e-20	7.19564e-19
EFEMP2	1.39882	7.45816e-20	1.03399e-18
ERRFI1	0.872864	9.88724e-19	1.33445e-17
PRRX1	1.4591	1.29684e-18	1.73878e-17
CXCL12	1.46217	2.9105e-18	3.87686e-17
MMP2	1.40276	8.09196e-18	1.05041e-16
HTRA1	1.39896	1.37627e-17	1.76404e-16
SERPINF1	1.11632	1.46138e-17	1.86143e-16
SERPINE1	1.76498	1.89565e-17	2.39959e-16
COPS8	0.688473	2.00106e-17	2.51739e-16
COX7A1	1.65792	3.57324e-17	4.46764e-16
MYLK	1.55499	4.57696e-17	5.68771e-16
LAMA4	1.21926	5.70815e-17	7.05042e-16
DLC1	1.60853	8.15495e-17	1.00119e-15
PDGFRB	1.54485	9.62353e-17	1.16743e-15
MFAP4	2.0211	1.19757e-16	1.44417e-15
EFNA1	0.926906	2.63558e-16	3.15959e-15
HES1	0.775557	5.89212e-16	6.98147e-15
FKBP10	1.02695	7.33956e-16	8.59656e-15
HSPG2	1.28549	1.00374e-15	1.16229e-14
EDN1	1.44818	1.09463e-15	1.25393e-14
EMP1	0.841033	1.09519e-15	1.25393e-14
TINAGL1	1.14102	1.16542e-15	1.32688e-14
CTSF	0.948684	1.72675e-15	1.95507e-14
COL5A2	1.2113	6.19972e-15	6.79303e-14
GEM	0.907285	7.92939e-15	8.5958e-14
SGCE	1.17901	8.03893e-15	8.66843e-14
COL14A1	2.08753	1.27602e-14	1.3687e-13
GGT5	1.58991	1.40481e-14	1.49895e-13
SLPI	0.854979	1.58729e-14	1.68484e-13
ESAM	1.96297	2.65596e-14	2.77582e-13
CYP27A1	1.04119	2.78259e-14	2.89333e-13
PLS3	1.39074	3.24435e-14	3.35634e-13
FXYD1	1.54038	3.36872e-14	3.46739e-13
PDK4	1.2032	4.85645e-14	4.94872e-13
PTN	1.43699	5.90859e-14	5.9909e-13
GPX3	1.24745	1.13816e-13	1.13704e-12
HES4	0.749817	2.42499e-13	2.39909e-12
PLPP1	0.767543	2.56277e-13	2.51102e-12
PHLDB2	1.59515	3.54571e-13	3.4575e-12
ID1	1.01361	5.02517e-13	4.8308e-12
HSPB6	3.14413	5.28167e-13	5.05355e-12
MSRB3	1.65934	5.43187e-13	5.17296e-12
HILPDA	0.826399	7.08778e-13	6.65663e-12
LAMB1	1.17154	7.90516e-13	7.39024e-12
IGFBP6	1.38511	8.04486e-13	7.4865e-12
NDUFA4L2	1.55358	1.23191e-12	1.13603e-11
MAFF	0.643274	2.11362e-12	1.92302e-11
MTUS1	1.11764	2.16676e-12	1.96261e-11
RAMP2	1.60434	2.81498e-12	2.52728e-11
SMOC2	2.0191	4.52427e-12	3.99797e-11
CRABP2	0.718761	4.53155e-12	3.99797e-11
CFH	1.37603	5.09546e-12	4.4761e-11
AKAP12	1.72032	6.41816e-12	5.61382e-11
CLEC11A	0.977554	6.87299e-12	5.96049e-11
PPFIBP1	0.739688	7.50107e-12	6.45028e-11
CYP1B1	1.35765	1.05073e-11	8.93021e-11
CAV2	0.772887	1.43998e-11	1.21771e-10
LDB2	1.4841	1.65526e-11	1.38824e-10
RGS5	2.18247	2.05998e-11	1.71357e-10
MT1M	2.12757	2.31666e-11	1.90377e-10
FN1	0.623562	3.16586e-11	2.57052e-10
TRIP10	1.02782	3.23888e-11	2.61938e-10
MEG3	1.33346	3.54341e-11	2.84309e-10
CD248	1.56284	4.10371e-11	3.27975e-10
LTBP1	1.41609	4.45009e-11	3.54269e-10
TPBG	0.857718	5.32914e-11	4.22598e-10
DKK3	1.39503	7.03967e-11	5.56079e-10
A2M	0.793878	7.49307e-11	5.89609e-10
FKBP9	0.929744	7.73773e-11	6.06519e-10
DNAJB4	0.684128	8.02364e-11	6.2652e-10
SPRY1	0.811956	8.45042e-11	6.57327e-10
CD34	1.76777	9.8102e-11	7.60197e-10
RNF39	1.6741	1.23533e-10	9.53636e-10
PTP4A3	1.04276	1.61776e-10	1.23947e-09
PDLIM4	1.14746	1.92808e-10	1.46621e-09
NID1	1.30176	2.03399e-10	1.54099e-09
PDGFRL	1.84403	2.29102e-10	1.72291e-09
FBLN5	0.952195	2.39907e-10	1.79754e-09
RGS16	0.857789	2.70472e-10	2.00444e-09
NRN1	1.54993	2.72932e-10	2.01534e-09
C11orf96	1.72915	3.07877e-10	2.26517e-09
NREP	0.949146	3.47807e-10	2.54975e-09
DLK1	1.48009	4.38054e-10	3.17706e-09
RBFOX2	0.896168	5.00186e-10	3.60205e-09
GNAI1	1.33584	5.72339e-10	4.09273e-09
RSPO3	2.00937	5.88083e-10	4.19061e-09
RND1	1.31134	6.70769e-10	4.76316e-09
CRYAB	0.596135	7.08483e-10	5.0135e-09
VASN	1.02738	7.38374e-10	5.20694e-09
SLIT3	2.14304	7.7474e-10	5.42584e-09
MEST	0.930874	8.10097e-10	5.63474e-09
MAP1A	1.30702	8.72932e-10	6.05114e-09
SPON2	0.86564	9.71445e-10	6.71121e-09
EPS8	0.784421	1.13683e-09	7.82723e-09
CAMK2N1	1.38062	1.64197e-09	1.11917e-08
FABP4	1.96705	1.65394e-09	1.12358e-08
CRISPLD2	1.20877	1.68461e-09	1.14061e-08
EBF1	1.2706	2.04105e-09	1.37282e-08
RND3	0.814206	3.0792e-09	2.06428e-08
MALL	1.07041	3.15319e-09	2.10695e-08
IGF2	1.81349	3.17791e-09	2.11653e-08
RCAN1	0.789334	3.81005e-09	2.52107e-08
GULP1	1.40899	4.33676e-09	2.8603e-08
FBN1	1.16558	6.55225e-09	4.29373e-08
OLFM1	1.86004	6.78519e-09	4.43212e-08
CNFN	1.14275	6.95646e-09	4.52948e-08
CRABP1	1.04932	8.69099e-09	5.64084e-08
EGFL7	1.00299	9.31858e-09	6.00989e-08
GAS6	0.767368	1.12384e-08	7.20247e-08
TDO2	1.31469	1.14172e-08	7.27134e-08
THBS2	1.7453	1.20493e-08	7.64996e-08
EPAS1	0.833621	1.24562e-08	7.88379e-08
CERCAM	0.870685	1.26855e-08	8.00406e-08
GPRC5C	1.17343	2.07781e-08	1.29103e-07
JAG1	1.07781	2.34784e-08	1.45438e-07
RAI14	0.971153	2.56114e-08	1.5817e-07
EGFLAM	1.61652	3.30385e-08	2.03421e-07
LTBP4	0.704804	3.70982e-08	2.27046e-07
ISLR	0.989947	4.10286e-08	2.50348e-07
FGF7	1.60285	4.7456e-08	2.87843e-07
EFEMP1	0.8706	5.08153e-08	3.05491e-07
ADAMTS4	1.41705	6.31243e-08	3.77265e-07
SYNPO2	1.81527	6.7476e-08	4.01117e-07
FBLN2	1.53303	6.92402e-08	4.10208e-07
PEG10	0.806999	8.47976e-08	4.99472e-07
CYYR1	1.35634	8.50546e-08	4.99542e-07
SGCB	0.792648	9.06965e-08	5.28113e-07
ZNF667-AS1	0.930059	1.19579e-07	6.86482e-07
SEPT4	1.41046	1.5228e-07	8.6689e-07
CPXM1	2.03324	1.76257e-07	9.97809e-07
CEBPD	0.440752	1.8743e-07	1.0552e-06
NES	1.24433	1.90074e-07	1.06714e-06
OAF	1.1505	1.93901e-07	1.08563e-06
TNXB	2.13198	2.0439e-07	1.13811e-06
TMEM98	1.09621	2.10812e-07	1.17067e-06
FGFR1	0.825429	2.16319e-07	1.19798e-06
TNS2	1.36477	2.20452e-07	1.21756e-06
CALML5	0.49858	2.30629e-07	1.27033e-06
TUBB6	0.658017	2.46417e-07	1.33919e-06
OLFML3	0.945278	2.70782e-07	1.4677e-06
ADGRF5	1.8499	2.80198e-07	1.51234e-06
SFRP4	2.77048	3.44351e-07	1.85168e-06
GJA4	2.0338	3.85768e-07	2.0581e-06
FKBP7	1.00173	4.05701e-07	2.15317e-06
PLXDC1	1.16639	4.36424e-07	2.30423e-06
DTWD1	0.587107	4.92154e-07	2.58508e-06
MCAM	1.25754	5.66598e-07	2.96084e-06
SNCG	1.35706	5.7197e-07	2.97774e-06
PPP1R14A	1.59333	5.72754e-07	2.97774e-06
MTRNR2L8	0.576299	5.96701e-07	3.09434e-06
SLC9A3R2	0.958665	6.31066e-07	3.26425e-06
LURAP1L	1.02973	6.65889e-07	3.42697e-06
LAMC1	0.847405	8.78016e-07	4.47349e-06
GPC3	2.21344	8.92396e-07	4.53542e-06
DCLK1	1.5535	1.01004e-06	5.12054e-06
HMGB3	0.531288	1.01565e-06	5.13619e-06
AK1	0.63384	1.02942e-06	5.18013e-06
MESP1	0.920446	1.06674e-06	5.34155e-06
DPYSL3	1.13156	1.13374e-06	5.64929e-06
NR2F1	1.50874	1.13741e-06	5.65374e-06
IGKV4-1	0.402015	1.16476e-06	5.77564e-06
RBMS3	1.39006	1.26448e-06	6.25488e-06
EMILIN1	1.12932	1.31312e-06	6.47974e-06
CREB3L1	1.24069	1.36067e-06	6.69816e-06
RCN3	0.884409	1.44214e-06	7.06508e-06
GPRC5B	1.29628	1.56807e-06	7.66362e-06
FXYD3	0.497092	1.63426e-06	7.93005e-06
GLT8D2	1.1559	1.76546e-06	8.54631e-06
SERPINE2	0.506079	2.41688e-06	1.1617e-05
PCSK1N	1.20644	2.70145e-06	1.28936e-05
CXCL14	1.418	3.04367e-06	1.44592e-05
COL15A1	0.996025	4.06142e-06	1.91159e-05
ASPN	2.21187	4.0944e-06	1.92267e-05
PHLDB1	0.785853	4.10595e-06	1.92366e-05
GRB10	1.13733	4.4912e-06	2.09933e-05
LMCD1	0.635799	5.01681e-06	2.33965e-05
ANGPT2	1.66099	5.17955e-06	2.41003e-05
ELN	1.64484	5.19966e-06	2.4101e-05
DPT	1.43197	5.20336e-06	2.4101e-05
CST3	0.31128	5.90452e-06	2.72249e-05
TIMP1	0.327661	6.52447e-06	2.99479e-05
RUNX1T1	1.33435	6.60657e-06	3.02566e-05
PPARG	1.16461	6.62803e-06	3.02868e-05
IL33	1.39619	7.45507e-06	3.38384e-05
RNASE4	1.10373	7.93294e-06	3.59274e-05
EDNRB	1.28585	8.66495e-06	3.88113e-05
JAM2	1.25755	8.9044e-06	3.97964e-05
ZNF503	0.893544	9.06757e-06	4.03742e-05
TMEM47	1.30505	9.0733e-06	4.03742e-05
LINC01116	1.25407	1.04414e-05	4.61596e-05
NT5E	1.20922	1.09997e-05	4.85224e-05
COL12A1	1.11632	1.15502e-05	5.08407e-05
UGDH	0.628601	1.22269e-05	5.37034e-05
RASL11A	1.08092	1.46912e-05	6.42505e-05
OSMR	1.00221	1.51659e-05	6.59021e-05
TWIST2	1.67953	1.54598e-05	6.70363e-05
AMOTL1	1.31631	1.56249e-05	6.76083e-05
FAM171A1	1.36862	1.67788e-05	7.24039e-05
LIFR	1.64986	1.72336e-05	7.40972e-05
OGN	2.11754	1.74042e-05	7.46731e-05
CENPW	0.586361	1.80333e-05	7.72096e-05
LRRC17	1.57112	1.9145e-05	8.17977e-05
P4HA2	0.753943	1.95721e-05	8.34476e-05
KANK2	1.01845	2.13183e-05	9.07028e-05
CDO1	2.08144	2.32995e-05	9.87201e-05
SMTN	0.897737	2.37857e-05	0.000100363
NDN	1.15433	2.50913e-05	0.000105653
STXBP1	1.1526	2.56014e-05	0.000107578
HSPB8	1.60154	2.60681e-05	0.000109124
FAM171B	1.50126	2.77834e-05	0.000115874
DDR2	0.927007	2.7803e-05	0.000115874
GJA1	1.17138	2.96214e-05	0.000123201
PGF	1.31284	3.26659e-05	0.000135037
ST5	0.897696	3.3715e-05	0.000139091
F2R	0.518209	3.64828e-05	0.000149903
ADAMTS9	1.42296	3.85025e-05	0.000156936
ADAM12	0.888395	4.12765e-05	0.000167032
PFKM	0.961814	4.13072e-05	0.000167032
PALMD	1.03491	5.17349e-05	0.00020796
PRELP	1.31578	5.23473e-05	0.000210008
FAP	1.24061	5.29214e-05	0.000211893
KLF9	0.453518	5.45784e-05	0.000217673
CLEC14A	1.52323	6.00914e-05	0.000238726
TGFBR3	0.647171	6.17232e-05	0.000244731
NOTCH3	0.824483	6.39337e-05	0.000253004
ANGPTL2	1.18332	6.73243e-05	0.000265391
OLFML2A	1.3339	7.27254e-05	0.000285028
ABCA8	2.30486	7.35382e-05	0.00028766
CNN1	2.06237	7.56405e-05	0.000295317
IGFBP3	0.984674	7.84513e-05	0.000305705
LMOD1	2.03985	8.15524e-05	0.000316579
RERG	0.848741	8.20486e-05	0.000317899
TBX3	1.02428	8.27879e-05	0.000320155
EMCN	1.65042	8.53724e-05	0.000328902
MAGI1	1.07134	9.29968e-05	0.000356255
GDF15	1.34319	9.55387e-05	0.000365306
PTGDS	0.700704	9.6173e-05	0.000366826
TMEM204	0.64821	9.62962e-05	0.000366826
NOSTRIN	1.20004	9.70609e-05	0.000369049
MPDZ	1.11784	0.000100964	0.000383174
STEAP1	0.995697	0.0001048	0.000396256
ITIH5	2.0316	0.000108298	0.000408723
SNAI2	1.04087	0.000124018	0.000464707
FEZ1	1.27619	0.000124044	0.000464707
FAM110B	1.02252	0.000140131	0.000524014
ZEB1	0.481197	0.000149166	0.000556775
PTPRG	1.21212	0.000150959	0.000561412
POSTN	0.526337	0.000154308	0.000571782
OLFML1	1.89536	0.000180065	0.000663001
ADAMTS12	1.21301	0.00019229	0.000704833
ACTG2	1.20166	0.000226486	0.000819856
PLVAP	1.19465	0.000233601	0.000842617
ADGRL4	1.50271	0.000240842	0.000865673
VWF	1.3389	0.000248974	0.000893325
ID4	1.32139	0.000265231	0.000949983
SOCS2	0.803326	0.000272648	0.000973129
HYAL2	0.700599	0.00027372	0.000973544
INSR	0.8217	0.00027619	0.00098062
AQP1	1.00627	0.000293885	0.00103982
FRMD6	0.914364	0.000305104	0.00107765
GPC1	0.863558	0.000311351	0.00109591
PROCR	0.976336	0.000317885	0.00111698
FZD4	1.24291	0.000329439	0.0011536
LIMS2	0.970164	0.000349428	0.0012215
ARC	1.30743	0.000351691	0.00122731
TPPP3	1.52422	0.000381491	0.00132675
ITGA6	0.478788	0.000396664	0.00137483
APOLD1	1.13412	0.000421707	0.00145915
FAM13C	1.77459	0.000424843	0.00146751
MT1A	2.05086	0.000435412	0.00150147
HIGD1B	2.36314	0.000452055	0.0015536
SLC39A13	0.538035	0.000479536	0.00164528
THBS1	0.392095	0.000494727	0.00169454
PLA2G2A	1.97933	0.000496586	0.00169806
SEMA5A	1.34325	0.000520376	0.00177643
MRGPRF	1.61454	0.000575697	0.0019522
VCAN	0.345358	0.000577684	0.00195244
RAMP3	1.2856	0.000593505	0.00200259
CNKSR3	1.00325	0.00059533	0.00200543
LAMB2	0.722096	0.000602229	0.00202532
HOXB2	0.447215	0.000609246	0.00204554
EDNRA	1.5038	0.000634669	0.0021239
CNRIP1	0.790634	0.000653787	0.00218429
CRIM1	0.63163	0.000755724	0.00251251
PHLDA3	0.705146	0.000780351	0.00259016
PODN	1.61947	0.000806635	0.00267304
KLF7	0.714165	0.000848138	0.00279242
COX4I2	2.2469	0.000881629	0.00289333
P3H4	0.669537	0.000904987	0.00296522
RGMA	0.850016	0.000913961	0.00298981
DKK1	1.07839	0.000925824	0.00301894
LOXL1	0.897116	0.000926148	0.00301894
CDKN1C	0.842387	0.00092731	0.00301894
PLAT	0.846634	0.000951849	0.00307916
ALPL	1.2071	0.000965664	0.00311676
TTYH1	1.19489	0.000971715	0.00312359
A4GALT	0.94211	0.00108953	0.0034858
CLDN5	1.62688	0.00110455	0.00352834
CALCRL	1.10236	0.00111674	0.00355611
C9orf3	0.777931	0.00112247	0.0035688
TMEM119	1.05067	0.00112651	0.00357606
SNX7	0.696074	0.00113982	0.00361269
GPR4	1.8649	0.00117612	0.00371526
IGLV1-40	0.356558	0.00117765	0.00371526
ADGRA2	1.16405	0.00120536	0.00379092
ADM	0.642337	0.00123313	0.00386634
COL27A1	1.03037	0.00129453	0.00404639
CHRDL1	2.52691	0.00130172	0.00406265
OSR1	1.59398	0.00131989	0.00410678
JAM3	1.25108	0.00137085	0.00425882
ID3	0.309715	0.00150865	0.00465852
MXRA7	0.857472	0.00155106	0.00477501
C5orf38	1.13873	0.00156187	0.00480105
NEURL1B	1.56031	0.00158983	0.0048723
PXDN	0.633927	0.00159858	0.00489176
RASL12	1.83354	0.00170637	0.00519551
CFI	1.21899	0.00170804	0.00519551
OBSL1	0.873103	0.00175053	0.00530101
PCDH18	1.19422	0.00179507	0.00542783
RPP21	0.422639	0.0017981	0.00542893
ECM2	1.84705	0.00183054	0.00551869
NXN	1.16792	0.00183361	0.00551978
SMIM10	1.20532	0.00185948	0.00558942
ENPEP	1.79565	0.00187209	0.00561731
CHAC1	1.35424	0.00203063	0.00606808
INAFM1	0.541784	0.00204575	0.00610431
CPQ	0.451767	0.00211231	0.0062937
LRG1	0.993673	0.0021714	0.00646031
ANTXR1	0.764438	0.0021755	0.00646306
FSTL3	0.998269	0.00218905	0.00649387
HGF	1.18007	0.00227619	0.00673278
MMP14	0.481127	0.00231078	0.00682518
F3	0.834491	0.00248352	0.00730363
MSX1	1.60261	0.00257486	0.00756134
KCNE4	1.71212	0.00260969	0.00765258
COL5A1	0.639251	0.00264329	0.00771993
IGHV6-1	0.506082	0.00264356	0.00771993
GABRP	0.709661	0.00288115	0.00837628
GPR176	1.99808	0.00304976	0.00881619
SVEP1	2.22141	0.00306639	0.0088517
HEG1	0.544075	0.00315483	0.00906848
NSMCE4A	0.321683	0.00320212	0.00917851
MT1E	0.288092	0.00323769	0.00925444
CCDC102B	0.965656	0.00332824	0.00947339
ABCA6	1.30231	0.00350023	0.00992137
BMP1	0.86522	0.00361852	0.0102424
GJC1	1.66193	0.00368975	0.0104007
PDGFD	1.04028	0.00378331	0.0106497
PLEKHG1	0.706551	0.00391732	0.0110117
ABI3BP	1.50066	0.00400042	0.0112298
KCNJ8	1.64568	0.00414336	0.0116151
C1QTNF4	2.23148	0.0041749	0.0116874
LRRC32	1.07092	0.00439528	0.0122204
ZG16B	0.49971	0.00446071	0.0123855
C11orf70	1.45291	0.00457702	0.0126575
C1QTNF1	1.10035	0.00460154	0.0127072
RAPGEF5	1.17314	0.00469071	0.012936
SOX13	1.16779	0.00499015	0.0137432
SPRY4	1.33817	0.00503351	0.0138438
MMRN2	1.4646	0.00512387	0.0140734
PRAF2	0.530805	0.00513997	0.0140986
GALNT16	1.37313	0.0051523	0.0141053
DEFB1	0.681833	0.00515802	0.0141053
FILIP1	1.46875	0.00516316	0.0141053
MECOM	1.27574	0.00537057	0.0146326
ZNF385D	1.00585	0.00546749	0.0148768
MEOX2	1.7874	0.00551431	0.0149842
ABCC9	2.04917	0.005613	0.0152321
TNS1	0.756653	0.00572073	0.0155038
NEDD4	0.954681	0.00582151	0.015756
LOXL2	0.763049	0.00600084	0.0162055
NEXN	0.717272	0.00600352	0.0162055
HTRA3	1.15381	0.00626555	0.0168237
AP000769.1	0.540897	0.00653823	0.0174639
MAP3K7CL	1.16358	0.00661565	0.0176244
TTC28	0.846476	0.00672537	0.0178933
KCNS3	0.651111	0.00683444	0.0181126
CRISP3	1.14415	0.00688477	0.0182223
ECM1	0.634721	0.00702052	0.0185335
TBX2	1.6338	0.00712357	0.0187799
LGI4	2.17742	0.00715879	0.0188253
TDRP	1.48121	0.00724311	0.0190225
HOXD8	1.57065	0.00749026	0.019621
FMO1	1.22748	0.00755344	0.0197611
SEMA4C	0.933415	0.00779014	0.0202763
CXorf36	1.40947	0.00784123	0.0203832
PDPN	1.02598	0.00785828	0.0204015
MATN2	0.995847	0.0080092	0.0207669
C2orf76	0.421817	0.00803452	0.020806
CSPG4	1.54213	0.00822714	0.0211971
FBXO32	0.331721	0.00854694	0.0219655
MMP23B	1.38703	0.00906704	0.0231852
PODXL	0.64211	0.00923215	0.0235778
GPM6B	0.423132	0.00964603	0.0245733
DMPK	0.970883	0.00967598	0.0246188
PLSCR4	0.815295	0.0097849	0.0248649
CILP	1.62411	0.0101107	0.0256289
LAMA5	0.724981	0.0101448	0.0256834
HOXA10	0.974434	0.0102157	0.0258308
FXYD6	0.625592	0.0104984	0.0265127
TSPAN7	1.28846	0.0105514	0.0265807
CFB	0.809748	0.0106173	0.0267137
UCHL1	0.661638	0.0107166	0.026897
KLHL13	1.43561	0.010785	0.0270023
ZNF703	0.606401	0.0108132	0.0270396
CDH5	1.38974	0.0110584	0.0276189
PRKG1	1.4499	0.0111803	0.027865
SYNPO	1.16924	0.0112475	0.0279541
PLAU	0.477886	0.0115555	0.028615
FJX1	0.842631	0.0115702	0.0286167
MEIS2	0.736405	0.0116389	0.0287405
TMTC1	1.49563	0.0121313	0.0298593
ADCY4	1.27154	0.0122567	0.0301318
NID2	1.21571	0.01233	0.0302753
MMP11	0.765874	0.0125157	0.0306945
PLEKHH2	0.994718	0.0127764	0.0312961
FAM162B	2.23406	0.0131609	0.0321607
RBP5	0.955013	0.0132004	0.0321799
TGFB3	0.920252	0.0132507	0.0322638
DIRAS3	1.41712	0.0136072	0.0330925
PTPRB	1.47543	0.0136552	0.0331696
ZNF354A	0.630083	0.0139642	0.0338797
FBXL13	1.26136	0.0142404	0.0344269
MSX2	1.57903	0.0144745	0.0349515
TCEAL1	0.462023	0.0146125	0.035243
TMEM255B	0.916945	0.0147491	0.0355302
CACNA2D1	1.26702	0.0147793	0.0355481
ZBTB16	0.638131	0.0147913	0.0355481
CLDN11	1.71835	0.0149422	0.0358261
CX3CL1	0.538188	0.0150389	0.0360156
RHOJ	1.01703	0.0152946	0.036585
CLEC3B	1.97329	0.0154106	0.0367761
EPB41L4A	1.20667	0.0156375	0.0372305
ANKRD29	1.06354	0.0161504	0.0384067
LBP	1.23397	0.0162904	0.0386945
CASKIN2	1.10928	0.016352	0.0387482
TFPI2	1.16849	0.0163592	0.0387482
TNC	0.749177	0.0163701	0.0387482
RAB23	0.929866	0.0167921	0.0396427
LOX	0.822673	0.0168063	0.0396427
SMAD9	1.8682	0.0168718	0.0397512
NOVA1	1.53787	0.0183022	0.0428734
RAB6B	1.24402	0.0186783	0.0436551
CIART	0.999751	0.0186787	0.0436551
SPEG	0.990966	0.0188634	0.0440362
PCDH1	1.10677	0.0188982	0.0440671
LTF	0.396108	0.018926	0.0440815
PDGFRA	0.75374	0.0192512	0.0447365
PAM	0.257873	0.0193701	0.0449105
PLEKHA4	0.784245	0.0194301	0.0449983
TMEM108	1.35253	0.0196218	0.0453393
ARHGEF25	1.40591	0.0199991	0.0461066
REM1	1.83913	0.0200626	0.0462007
TSHZ2	0.294071	0.0202593	0.0466011
SCG5	0.980153	0.0204337	0.0469492
SOX17	1.87998	0.020889	0.0479411
ERG	1.6031	0.020923	0.0479652
P3H1	0.362623	0.022047	0.0503155
HSPA12B	1.63055	0.0223258	0.050838
MXRA5	0.632225	0.0223923	0.0508891
KALRN	1.32282	0.0224082	0.0508891
PLEKHH3	0.824124	0.0224232	0.0508891
SYDE1	1.06496	0.0231605	0.0523294
L3HYPDH	0.527518	0.0233479	0.0526944
F10	1.67515	0.0237604	0.053566
ADAMTS5	1.46576	0.023808	0.0536141
SLIT2	1.04361	0.023887	0.0537326
FADS3	0.40418	0.0240404	0.054018
DYRK3	0.868372	0.0250026	0.0559947
CHN1	0.483365	0.0250892	0.056127
MFAP5	1.14847	0.0252016	0.0562598
TNFRSF10D	0.654412	0.0252095	0.0562598
RGS4	1.69121	0.0254686	0.0566884
FLNC	1.5025	0.0254792	0.0566884
PLOD2	0.560986	0.0257004	0.0571182
CFL2	0.585483	0.0259689	0.0576521
TNFAIP6	0.499042	0.0263393	0.0582206
PREX2	1.53554	0.027038	0.0595714
TCEAL7	1.50793	0.027713	0.0609267
COL16A1	0.763761	0.0279858	0.061411
FRY	0.98348	0.0279935	0.061411
TMEM45A	0.391396	0.0281242	0.0616314
CYP4Z1	0.95449	0.0282505	0.0618417
NR2F2-AS1	1.51399	0.0289507	0.0633064
PDE5A	1.15392	0.0295854	0.0644866
SLCO2A1	1.17624	0.029978	0.0652726
TBX2-AS1	1.77754	0.0304187	0.0661551
MEDAG	1.71794	0.0304482	0.0661551
BNC2	0.918495	0.0307956	0.0667675
CTPS2	0.796272	0.0309273	0.0669818
TSPAN8	1.43365	0.0310083	0.0670858
SLCO3A1	0.525133	0.0311414	0.0672841
WISP2	1.60323	0.0311659	0.0672841
MOCS1	1.58432	0.0312279	0.0673465
NFATC4	1.30439	0.0318265	0.0685648
PLAGL1	0.350921	0.0321257	0.0691364
RBPMS2	1.44598	0.032255	0.0693415
LXN	0.41225	0.0327237	0.0702009
PDE1A	1.80246	0.0348707	0.0745713
MYH11	1.49712	0.0352603	0.0753254
HOXC6	1.23507	0.0353952	0.0755345
FAM107A	1.7444	0.0357343	0.0761783
VWA1	0.634661	0.0375952	0.0796455
MAGEH1	0.179799	0.0390061	0.0822073
EGFL6	1.04282	0.0393392	0.0828237
AKT3	0.480581	0.0401098	0.0841851
RCAN2	1.12415	0.0403728	0.08465
TYMS	0.271995	0.04047	0.0847666
EFNB2	0.702462	0.0407151	0.0850604
ACVRL1	0.652651	0.0407355	0.0850604
FOXC1	0.621514	0.0415687	0.0867114
IL6	0.832923	0.0424255	0.0881378
ANGPTL1	1.49483	0.0425052	0.0882135
DAAM2	1.39766	0.0428707	0.0888078
VCAM1	0.360052	0.0428787	0.0888078
FMO2	1.05324	0.0430516	0.0890752
PRR16	1.33386	0.0436486	0.0902189
NMD3	0.311968	0.0437377	0.0903115
PALM	1.46788	0.0439864	0.0907331
S100A3	1.33733	0.044638	0.0918252
SDC2	0.29966	0.0446961	0.0918252
FBXO3	0.296437	0.0459244	0.0940642
NLGN2	1.18568	0.0465965	0.0951541
PCOLCE2	1.20117	0.0469449	0.0956738
GAS1	0.795943	0.04793	0.0974864
CD36	0.723667	0.0492654	0.099804
AOC3	1.56346	0.0493816	0.0999401
PGRMC2	0.349281	0.0502245	0.101545
HOXC9	0.83073	0.0504595	0.101818
ITGBL1	1.08355	0.0507218	0.102246
MPZ	1.21084	0.0513451	0.1034
SLC40A1	0.095155	0.0516149	0.103808
IGLC3	0.629543	0.0516493	0.103808
PTBP2	0.454811	0.052473	0.10536
NUAK1	1.12912	0.0528073	0.105926
SHOX2	1.11205	0.0529571	0.106122
STEAP4	0.688517	0.0541616	0.108111
MRVI1	1.0493	0.0553897	0.110346
PTPRM	0.837256	0.0557413	0.110938
RAPGEF3	1.40625	0.056074	0.111492
DOCK6	0.987384	0.0570536	0.113218
HECW2	1.12719	0.0571523	0.113304
RRAD	1.24471	0.0574556	0.113684
CPXM2	1.24158	0.0575666	0.113722
CCL2	0.271453	0.0575863	0.113722
FST	1.87517	0.0590829	0.116339
VEGFC	1.22278	0.059295	0.116644
PTPN13	0.647705	0.0595412	0.117015
ROBO4	1.39164	0.0600796	0.117733
MYCT1	1.36911	0.0604346	0.118201
BTNL9	1.73283	0.0605771	0.118366
SERPINI1	0.879231	0.0614236	0.119791
ZNF521	0.856505	0.0621082	0.120677
WNT2	1.04785	0.0626198	0.121426
APOE	0.113296	0.0637038	0.123077
CCDC3	1.42593	0.0637128	0.123077
TIE1	1.15336	0.0649983	0.125323
HOXD9	1.49452	0.0655046	0.125992
KDELR3	0.306993	0.0658735	0.126474
ACKR1	1.1548	0.0659057	0.126474
FIBIN	0.784593	0.0666668	0.127694
NINL	1.23011	0.0676218	0.129281
VSTM4	1.29911	0.0691486	0.131952
IER5L	0.433621	0.0693739	0.132258
IGF1	0.450618	0.0695747	0.132517
ING1	0.335194	0.0705855	0.134191
WNT6	1.6262	0.0716044	0.135749
IGHV1-46	0.368878	0.0717689	0.135834
FOXS1	1.22341	0.0717828	0.135834
NR2F1-AS1	0.835812	0.0719888	0.136098
LYNX1	0.738008	0.0733428	0.138273
PPP1R12B	0.494838	0.0734161	0.138283
STC1	0.840568	0.0736506	0.138596
TMOD1	1.04398	0.073871	0.138883
HEPH	1.15351	0.0745461	0.140023
SULF1	0.654021	0.0765429	0.143233
ITGA1	0.353246	0.0779073	0.145255
PTGER3	0.866196	0.0779587	0.145255
SORBS2	0.57169	0.0779854	0.145255
INTU	0.714564	0.0780442	0.145255
HEY1	0.892655	0.0790871	0.147062
INSIG2	0.343991	0.0794782	0.147654
TCTN3	0.154685	0.080075	0.14843
RAMP1	0.559751	0.0801144	0.14843
HEYL	1.64749	0.0811918	0.15029
HEY2	1.02284	0.0828969	0.15289
ABCA10	1.40324	0.0833933	0.153528
LRRC49	1.16638	0.0839608	0.154433
NOTCH4	0.723594	0.0863441	0.158674
ADGRL2	0.971711	0.0881223	0.16165
PCED1A	0.275364	0.0891163	0.162865
MAMDC2	1.54163	0.0896831	0.163483
CNTNAP3B	1.51346	0.0939515	0.170932
PTGIS	1.3517	0.0940635	0.170932
SNTA1	0.69937	0.0967374	0.175557
ADAMTS2	0.462224	0.0968885	0.175675
PCAT19	1.41752	0.097353	0.17636
EFNB1	0.52883	0.0988881	0.178823
KDR	1.20618	0.0990102	0.178886
MIR497HG	1.02832	0.10084	0.181869
MRC2	0.391166	0.102399	0.184355
APLNR	1.21687	0.103955	0.186825
FAM43A	0.458523	0.105068	0.188659
ADAM33	1.53662	0.105296	0.188903
GABBR1	0.718846	0.105864	0.189754
ANGPT1	1.39844	0.108268	0.193723
ARHGAP23	1.03997	0.108866	0.194623
PROS1	0.414786	0.109352	0.195239
ARHGEF17	0.748159	0.109403	0.195239
S1PR1	0.28184	0.109613	0.195443
SEPT8	0.410378	0.110129	0.19603
KANK3	1.04021	0.111414	0.19779
HAAO	0.638282	0.111731	0.198178
HIST1H1E	0.308574	0.112798	0.199206
PCDH17	1.16546	0.113008	0.199403
PTX3	1.05007	0.113192	0.199404
MSRB2	0.337725	0.113204	0.199404
PPP2R5B	0.300803	0.11634	0.204162
CDC42EP5	1.00273	0.116354	0.204162
NME5	1.16306	0.116407	0.204162
RARB	1.39928	0.124607	0.217236
CAP2	0.999956	0.125884	0.218901
OSR2	0.70013	0.126646	0.21972
RNF152	0.823561	0.126778	0.21972
LEPR	0.950911	0.127464	0.220706
UBE2E2	0.164052	0.128769	0.222399
TWSG1	0.465801	0.13112	0.226077
FLRT2	1.47835	0.131305	0.226205
CARMN	1.4009	0.132557	0.227976
HSPA2	0.41826	0.133859	0.230021
LPL	0.745257	0.134397	0.230671
HMCN1	1.20056	0.134464	0.230671
SPOCD1	1.22772	0.134841	0.231071
GALNT5	1.15713	0.1379	0.23597
THSD7A	1.20298	0.138449	0.23671
FAM167B	0.687556	0.140037	0.238824
DOK4	0.888925	0.140816	0.239953
EGR2	0.192615	0.141849	0.241309
EPHA4	0.500942	0.142496	0.242207
HIC1	0.578843	0.143862	0.244122
IRS1	0.677896	0.14403	0.244204
FAM228B	0.365012	0.144397	0.244622
RASIP1	0.697184	0.144915	0.245146
GNPDA2	0.250409	0.144947	0.245146
PEAR1	1.46607	0.145674	0.246172
GATA2	1.0797	0.147307	0.248295
CYTH3	0.479045	0.147661	0.248499
CYGB	1.09748	0.147882	0.248667
FLT1	0.761423	0.149996	0.251185
YAP1	0.314069	0.150701	0.252158
ZNF787	0.624074	0.151377	0.253081
AGRN	0.364481	0.153308	0.255471
RBM45	0.475389	0.155769	0.259084
RABGAP1	0.217656	0.157954	0.261502
TM4SF18	0.482316	0.159559	0.263946
XG	1.50876	0.161058	0.26621
C2CD4B	1.25438	0.163197	0.269527
IGFBP2	0.541516	0.165726	0.272819
UBXN8	0.436638	0.167763	0.275726
ARAP3	0.977141	0.17081	0.280283
NFASC	0.835056	0.171373	0.28098
ZNF532	0.468399	0.172042	0.281624
IGF1R	0.543609	0.17278	0.282604
MAPK11	0.762146	0.173114	0.282924
FGD5	0.936416	0.176588	0.28755
ITGA5	0.315833	0.176783	0.28755
NHSL1	0.717436	0.176791	0.28755
ST6GALNAC3	0.677702	0.178659	0.290236
NPNT	0.789523	0.179204	0.290779
SYNC	0.578252	0.180855	0.293224
S1PR3	0.748699	0.183934	0.297507
BICC1	0.705666	0.184136	0.297597
TAC1	1.29656	0.186273	0.299895
SORBS1	1.07277	0.186294	0.299895
MMP28	1.07176	0.189455	0.304263
NOS3	0.719024	0.195195	0.312006
SHE	1.19776	0.19722	0.314257
ELOVL4	1.25781	0.197607	0.314382
SPOCK1	0.955456	0.198591	0.315456
FDCSP	0.363442	0.198592	0.315456
IL3RA	0.50884	0.201703	0.320149
TWIST1	0.934853	0.202227	0.320731
CCDC71L	0.320939	0.203588	0.322387
IL20	1.21082	0.206131	0.325654
ARL6	0.632615	0.206365	0.325772
CDH11	0.336504	0.207297	0.32699
MTMR11	0.483738	0.20954	0.329762
POLI	0.351328	0.209873	0.329993
COPZ2	0.649805	0.21001	0.329993
DNM3OS	1.00409	0.212191	0.333163
AASS	0.844373	0.217973	0.339365
C11orf95	1.01226	0.221665	0.344587
AC017002.2	0.287938	0.222381	0.345436
TDP2	0.22609	0.223676	0.347183
TMEM88	0.609108	0.224941	0.348806
NRXN2	1.1407	0.225064	0.348806
AFAP1L1	0.84691	0.226332	0.350239
SLC45A1	0.88666	0.226535	0.350287
DLL4	1.02796	0.227172	0.350845
GPR146	0.569386	0.22829	0.351936
IL1R1	0.426682	0.228292	0.351936
SCARF2	0.977487	0.230889	0.35482
SLC6A9	0.795592	0.231034	0.35482
GLIS3	0.792568	0.231572	0.355379
STK38L	0.234924	0.234223	0.358908
TMTC3	0.413405	0.235369	0.360392
BCAR1	0.373969	0.237135	0.362824
NTM	1.0689	0.23832	0.364364
ACVR2A	0.592097	0.239313	0.365608
TSPAN12	0.686454	0.240656	0.367109
MSC	0.272694	0.24156	0.367937
ALG8	0.18225	0.242104	0.368248
RNF165	1.00765	0.243549	0.370137
NSRP1	0.136271	0.24471	0.370794
SPRYD7	0.238082	0.248359	0.375764
ARL4D	0.159747	0.250195	0.377702
RNF180	0.901716	0.250853	0.378415
FBXL8	0.495887	0.25421	0.382629
IPO11	0.291261	0.256453	0.38572
ANKRD65	0.80441	0.256925	0.386146
SOX18	0.903617	0.258929	0.387374
EDIL3	1.24851	0.259073	0.387374
KLHL42	0.230322	0.259713	0.388047
CXCL2	0.0773489	0.260934	0.389585
EML1	0.758597	0.262147	0.390864
WTIP	1.15346	0.262174	0.390864
NBL1	0.324534	0.264144	0.393512
STARD9	0.513281	0.265258	0.394595
SSTR2	0.923646	0.268548	0.398343
CRYZL1	0.148197	0.268559	0.398343
RUSC2	0.912309	0.269219	0.398737
HNRNPH1	0.10767	0.269411	0.398737
CCNB1	0.30399	0.271134	0.400995
ARHGAP28	1.04891	0.272533	0.402479
EPDR1	0.911117	0.272747	0.402485
CPLX1	0.824961	0.272932	0.402485
RFTN2	1.01677	0.27418	0.404034
HRCT1	0.904702	0.274624	0.404175
SGIP1	1.00652	0.275159	0.404599
LRP12	0.488963	0.278851	0.409231
COL7A1	0.749523	0.282836	0.414094
THSD1	1.18057	0.283054	0.414117
ADGRA3	0.585979	0.283748	0.414536
COL5A3	0.623697	0.285818	0.417261
ZNF649	0.397946	0.289078	0.420514
CDKN3	0.273127	0.290601	0.421826
ADM5	1.1565	0.291426	0.422724
AXL	0.280349	0.293099	0.424545
TMEM44	0.518338	0.293852	0.425334
HAS2	0.901434	0.29633	0.428616
MATN3	1.24342	0.297388	0.429233
SNAI1	0.272383	0.299141	0.431167
ECEL1	1.05096	0.30029	0.432162
CLIC2	0.252692	0.300478	0.432162
GABRD	1.02093	0.301716	0.43323
STXBP5	0.458779	0.301858	0.43323
SCGB1B2P	0.999399	0.302208	0.433427
TRIB2	0.160105	0.302425	0.433434
CAPN6	0.747748	0.30355	0.434615
MMP16	0.672241	0.306628	0.437917
EN1	0.692613	0.307466	0.438806
CCR10	0.728779	0.310642	0.442101
SHROOM4	0.863535	0.313598	0.445374
FMO4	0.480989	0.314365	0.446153
NPEPL1	0.354718	0.315518	0.446619
ZNF507	0.279086	0.31557	0.446619
GAL	0.404492	0.317259	0.448387
CCDC74A	0.376813	0.320607	0.45249
PLCE1	0.535072	0.321021	0.452725
NRP1	0.197887	0.321217	0.452725
DCLK2	0.948247	0.321483	0.452787
ITGB5	0.215713	0.323453	0.455246
CNGA1	1.26006	0.326341	0.458995
PCSK5	0.642918	0.32732	0.459632
ZNF358	0.526468	0.328854	0.460767
SUSD2	0.284879	0.329997	0.461379
SLC12A2	0.194643	0.330072	0.461379
GRK5	0.20764	0.330074	0.461379
CTSO	0.145151	0.335918	0.468263
VWA5A	0.4073	0.337247	0.469794
MIR181A2HG	0.943658	0.339406	0.472157
CHI3L2	0.325444	0.343136	0.47637
PYDC1	0.788315	0.344564	0.477455
KIFC3	0.235411	0.345038	0.477709
IGLV2-23	0.194354	0.348225	0.481795
PHC1	0.265483	0.349152	0.481847
CPT1C	0.856676	0.349209	0.481847
TMEM158	0.474494	0.351381	0.484516
ACACB	0.484329	0.352087	0.484833
FAM89B	0.272569	0.35372	0.486753
HOXB3	0.995883	0.354166	0.486964
RBP7	0.580583	0.355435	0.488125
HOXB-AS1	0.442983	0.357667	0.490859
SEMA3F	0.889008	0.363499	0.497857
MTERF1	0.346769	0.364554	0.498677
DNMT3B	0.969883	0.367204	0.501583
PPP1R3D	0.399552	0.372448	0.507386
STX2	0.203872	0.373865	0.508636
ANKRD6	0.785556	0.375095	0.509879
DNAJC18	0.171325	0.375279	0.509879
COL10A1	1.06397	0.375637	0.510025
PDE2A	0.823987	0.379212	0.514194
IGHA1	0.554744	0.380194	0.515183
SYTL2	0.113336	0.385245	0.521335
MEOX1	0.852562	0.390226	0.526676
IGHV4-39	0.147629	0.392153	0.528227
CPNE8	0.178654	0.392699	0.528613
PTGIR	0.529711	0.394296	0.529742
SAMD11	1.13311	0.396314	0.531723
ZNF189	0.249974	0.399878	0.535096
CTNNB1	0.0777023	0.402366	0.538073
C12orf29	0.17067	0.404701	0.54084
RNF122	0.363388	0.408056	0.54407
PRTFDC1	0.294841	0.408186	0.54407
CITED4	0.441763	0.409344	0.544823
MPRIP	0.043059	0.409553	0.544823
CETN3	0.170613	0.410298	0.545458
ZSWIM4	0.426364	0.41304	0.548388
B3GALNT1	0.349879	0.41398	0.549279
SULF2	0.185195	0.415343	0.550729
CAMTA2	0.191933	0.415805	0.550982
ZEB1-AS1	0.374999	0.41732	0.551555
NTRK2	0.252385	0.41768	0.551673
TRMT11	0.182132	0.420903	0.555571
SERP2	0.561096	0.423124	0.556821
ADCY6	0.702696	0.423217	0.556821
PGM2L1	0.102754	0.425344	0.558915
HOXC8	0.730656	0.428942	0.5629
MAP2	0.633059	0.433225	0.567377
F2RL2	0.531559	0.433467	0.567377
RASD2	0.767614	0.436826	0.571289
CENPF	0.138196	0.439815	0.573449
VARS2	0.332387	0.440033	0.573449
MAP7D3	0.10965	0.440165	0.573449
EGR4	0.597315	0.440357	0.573449
SLC12A4	0.318878	0.44439	0.577963
ZNF626	0.432935	0.444695	0.577991
DVL2	0.14602	0.446467	0.579554
BAALC	0.912114	0.447182	0.579744
CHIC1	0.249453	0.449509	0.581698
FAM160A2	0.148846	0.462133	0.593669
NTN4	0.514243	0.465993	0.597505
HAND2	0.65213	0.468879	0.600071
PRRG1	0.623116	0.471779	0.602812
CERS5	-0.0174997	0.476885	0.608129
FGF1	0.895259	0.477134	0.608129
NSG1	0.348169	0.478451	0.609427
DLL1	0.56451	0.483143	0.613486
ARHGAP6	0.457778	0.484808	0.614512
RABL2A	0.402556	0.484855	0.614512
AKR1C1	0.393597	0.489237	0.617761
PDGFA	0.232772	0.490663	0.618794
STON1	0.806825	0.494463	0.62243
GPS2	0.134302	0.49636	0.624047
SNX33	0.459327	0.500203	0.628105
CSF1	-0.039123	0.50307	0.630539
MAPKBP1	0.236511	0.504683	0.631067
CCL19	0.572094	0.508425	0.633652
KCTD15	0.591377	0.508862	0.633652
DLX2	0.521748	0.508927	0.633652
GPX7	0.0552852	0.508937	0.633652
GPC6	0.549305	0.509583	0.633956
TBC1D19	0.12181	0.50984	0.633956
SNAPC3	0.1744	0.510275	0.63411
ARMCX4	0.518318	0.512689	0.636089
BPGM	0.134241	0.515812	0.639043
CCNJL	0.793156	0.522937	0.647083
IGHV1-2	0.242721	0.526957	0.651478
FER	0.217675	0.527333	0.651478
IL11RA	0.477326	0.527448	0.651478
BRMS1L	0.32866	0.528273	0.652102
MMP15	0.544564	0.529576	0.65292
C4orf46	0.231204	0.530379	0.653514
LINC01615	0.605947	0.531584	0.654603
ZNF345	0.230174	0.533145	0.655733
GPAT2	0.629397	0.537748	0.659751
CHST7	0.0869868	0.538031	0.659751
EVA1B	0.175955	0.540771	0.662713
MYOM2	0.105632	0.542427	0.664343
HOXA3	0.552608	0.543105	0.664374
ZNF2	0.406125	0.544463	0.665636
PARD6G	0.649711	0.545044	0.665947
RTN4RL2	0.696786	0.545759	0.666421
ZNF516	0.272561	0.548191	0.66859
PHKG1	0.4874	0.549031	0.669213
LINC01436	0.439039	0.550765	0.670925
H6PD	0.135853	0.553674	0.673665
ZNF543	0.452999	0.554966	0.674028
TRAF3IP2-AS1	0.186256	0.556647	0.675266
KDELC1	0.308768	0.561517	0.679959
SMARCA1	0.238554	0.562326	0.680535
CPD	0.0690356	0.563083	0.68082
ADAMTS6	0.173852	0.56323	0.68082
ZCCHC4	0.253297	0.563908	0.681236
C1QTNF6	0.198804	0.566532	0.684
ZNF23	0.531594	0.570041	0.687016
IGHA2	0.341566	0.573097	0.69029
PTHLH	0.26523	0.575015	0.691375
PPT2	0.584003	0.576684	0.692437
INHBA	0.251238	0.577257	0.692437
SYTL4	0.817113	0.579314	0.694495
MADCAM1	0.622658	0.582179	0.69711
TNFRSF10C	0.45592	0.583594	0.698394
ZBTB22	0.256216	0.584041	0.698518
NPIPA1	0.517476	0.586002	0.700042
SLC35D2	0.252044	0.58726	0.70062
PITPNM2	0.454497	0.588938	0.700814
PTCH2	0.562821	0.589399	0.700814
ZBTB40	0.164697	0.60181	0.71142
PLA2G6	0.229255	0.602238	0.711513
NIPSNAP3B	0.350437	0.602999	0.711587
LYPD1	0.715162	0.605496	0.713707
FNDC4	0.252057	0.606143	0.714058
ADCY3	0.135028	0.609748	0.717061
EVC2	0.435299	0.612554	0.719946
SMIM8	0.0840816	0.612928	0.719969
S100P	0.219013	0.614819	0.720944
IFT27	0.0587863	0.615671	0.721528
LAYN	-0.199787	0.619392	0.724674
SCIN	0.76174	0.62092	0.725593
PIGL	0.0824517	0.622323	0.7264
SUGCT	0.691863	0.624406	0.728414
GOLGA6L9	0.652134	0.626472	0.729988
PLLP	0.353128	0.628023	0.731378
IGLV4-69	0.53809	0.634276	0.737396
PRRX2	0.779437	0.637736	0.740574
RARRES1	-0.073698	0.645828	0.748265
LINC00987	0.324548	0.646933	0.748694
TMEM80	0.0518269	0.653406	0.753617
PDE4C	0.6423	0.656845	0.757156
DCX	0.203312	0.657593	0.757589
AKR1C3	0.107653	0.658947	0.758691
RRM2	0.170357	0.659403	0.758691
FBLN7	-0.204361	0.659667	0.758691
AFAP1L2	0.0409074	0.66711	0.765585
TTC33	0.0376477	0.667163	0.765585
MORN4	0.542661	0.66793	0.766033
ADCY9	0.61229	0.670323	0.767516
CDH13	0.239319	0.671282	0.768149
IGLC2	0.254401	0.67172	0.768218
KCNMB1	0.274042	0.672096	0.768218
CLDN15	0.226557	0.680445	0.774719
DNMBP	0.180399	0.681792	0.775819
MAP3K6	0.221757	0.687444	0.779639
PLEKHG5	0.405693	0.689072	0.780616
RASSF8	0.381325	0.696379	0.787159
ZFP30	0.194354	0.70279	0.79351
KRT23	0.309616	0.70466	0.794825
COL8A1	0.114205	0.704734	0.794825
TLE2	0.438221	0.705715	0.795491
PINLYP	0.431393	0.706644	0.796097
EHD3	0.327756	0.708182	0.79739
PARM1	0.429484	0.714297	0.803387
PPWD1	0.020578	0.718203	0.805558
PRRT2	0.545485	0.722235	0.809189
IGHV3-21	0.0634845	0.727026	0.813216
P4HA3	0.625123	0.72875	0.814251
GPRC5A	0.185374	0.734414	0.819232
NRARP	0.413635	0.740234	0.82437
ACHE	0.379157	0.743245	0.826369
FFAR2	0.500596	0.743928	0.826676
ANO1	0.27119	0.749983	0.832073
ZBED3	0.183069	0.750009	0.832073
NOMO1	0.317802	0.751244	0.832085
ACAP3	0.148342	0.751805	0.832254
PLA1A	0.258384	0.752879	0.832989
MIR4458HG	0.201049	0.753939	0.83371
PPP1R12C	0.130836	0.755105	0.834547
DNASE1L3	0.345055	0.758138	0.837445
NOV	0.35744	0.762446	0.840684
BIRC5	0.0971489	0.767983	0.844491
TSTD3	0.256648	0.768084	0.844491
CD200	-0.141943	0.768247	0.844491
FAM157C	0.477355	0.773257	0.848625
RHOC	0.0348368	0.780343	0.855481
NIPAL1	0.236915	0.781334	0.856107
BBS10	0.149278	0.786388	0.859243
MCM3	0.0201022	0.786726	0.859243
MAOA	0.33635	0.789726	0.861596
IGLV1-44	0.127736	0.796619	0.866361
TMEM147-AS1	0.191961	0.796875	0.866361
GDF11	0.000530665	0.801343	0.870542
NR2C1	0.133212	0.803855	0.871876
RAVER2	0.364542	0.80506	0.872719
ZNF445	0.101936	0.807756	0.875107
HIST1H3C	0.274121	0.811122	0.876787
WDR86	0.154901	0.818386	0.881538
AHNAK2	0.0523613	0.819268	0.882023
ATP8B2	-0.0429266	0.823742	0.885453
ABCB1	-0.0999483	0.827118	0.887991
CDC20	0.176436	0.827426	0.887991
TTC32	0.0857362	0.828416	0.888117
ZNF182	0.163716	0.831832	0.890375
SGCD	0.278842	0.834098	0.891395
TANC2	0.106115	0.836004	0.892965
TLL1	0.437011	0.8379	0.894052
DLX5	0.337194	0.840054	0.895351
ZNF620	0.172518	0.842825	0.897043
CDKL3	0.199107	0.842904	0.897043
ALDH1A1	0.118865	0.844277	0.898036
TPT1-AS1	0.0119169	0.845546	0.898838
TBKBP1	0.148655	0.846983	0.898838
ZNF684	0.207945	0.847236	0.898838
PLK1	0.139623	0.8519	0.902846
ABL2	0.0846647	0.85319	0.903273
ITGA11	0.334768	0.854753	0.904458
HSD11B1	0.133461	0.8568	0.905402
FUT4	0.0440925	0.862292	0.909602
GSKIP	0.116823	0.864778	0.911281
ANKRD30A	0.0178166	0.865731	0.911813
FAAP24	0.121134	0.867358	0.912689
TMEM242	0.0805689	0.868786	0.912689
EDARADD	0.0955132	0.869847	0.912689
DDX19A	0.0296474	0.870534	0.912689
APCDD1	0.285179	0.870939	0.912689
BCYRN1	0.380649	0.873058	0.914333
TBCEL	0.272123	0.87355	0.914379
ARL15	0.0350912	0.878359	0.917997
SCARB1	0.187916	0.880678	0.919478
EDN2	0.360219	0.885459	0.922579
IGLV1-47	0.0879177	0.886096	0.922771
FAM109B	0.149498	0.889531	0.925627
ADTRP	-0.132567	0.889746	0.925627
CACNA1C	0.314671	0.891538	0.927018
PIGK	0.138802	0.89399	0.928819
ZNF268	0.00993951	0.894182	0.928819
LINC01569	0.119095	0.895383	0.929592
MIF-AS1	0.194432	0.896781	0.93057
RALB	0.0500787	0.90115	0.934299
SMAD6	0.408177	0.901291	0.934299
NRGN	0.00608953	0.902493	0.935069
CHL1	0.128719	0.903683	0.935351
JAG2	0.19266	0.906198	0.937002
PARD6G-AS1	0.0325387	0.909924	0.940378
PTPN3	0.363759	0.912606	0.942671
UNK	0.0351173	0.913884	0.943411
CARD10	0.287263	0.914804	0.943508
CRTC2	0.00241359	0.916529	0.944789
ZNF783	-0.0112099	0.917084	0.944789
ZBTB46	0.146093	0.917438	0.944789
STAC2	0.00359206	0.919665	0.946327
S100A14	0.0157973	0.919889	0.946327
SNAPC1	0.0111071	0.920788	0.946327
AGR2	0.0774725	0.92904	0.952886
TNN	0.035584	0.931775	0.954874
LIN9	0.114591	0.931916	0.954874
AK9	0.0368629	0.934042	0.956572
ZFP1	0.109154	0.934604	0.956667
IGLV2-14	0.022603	0.939684	0.95914
MAP3K12	-0.0465464	0.941178	0.96002
TTC30A	0.125773	0.946916	0.964425
INTS6	0.00218258	0.94907	0.966136
NSUN3	0.0364353	0.950902	0.967518
PBLD	0.0504915	0.952042	0.968187
PGAP1	-0.288505	0.952572	0.968187
MED7	0.0238264	0.952985	0.968187
TFF1	0.00984429	0.95538	0.970137
PKN3	0.21794	0.962363	0.975284
ARL2	0.0984448	0.96377	0.976224
ZFAND2A	0.0264376	0.964298	0.976263
NCK2	-0.0526653	0.965909	0.976263
HDAC5	0.0261743	0.969624	0.979234
ZNF740	0.0126203	0.971215	0.979932
NKX3-1	0.161625	0.971277	0.979932
ARF4-AS1	0.158325	0.975357	0.983562
PCMTD2	-0.000932793	0.976694	0.984422
CBFA2T3	-0.219231	0.977906	0.984512
SH2D3C	-0.164937	0.978195	0.984512
ABTB1	-0.0961309	0.978232	0.984512
CCDC151	-0.121089	0.98079	0.986112
CHKB	-0.0325281	0.984315	0.989169
C3orf70	0.212001	0.992476	0.995897
MZF1-AS1	0.0447884	0.996447	0.998143
C8orf58	0.0675052	0.999057	0.999547
PDE1B	-0.195769	0.999663	0.999663
PGR	-0.214554	0.99721	0.99819
NUDT12	0.168709	0.996674	0.998143
FGFBP1	0.193847	0.994633	0.997079
DDX47	-0.0407249	0.993958	0.996893
PELI3	0.0251294	0.987587	0.991479
IGHV1-3	0.0801269	0.985381	0.989752
UBD	-0.106782	0.978891	0.984688
EXOC3L1	0.0481092	0.966203	0.976263
RABL2B	0.0591618	0.965642	0.976263
WIPF3	-0.153559	0.965294	0.976263
ZCCHC14	0.174043	0.960846	0.974231
ZNF449	-0.0662197	0.960817	0.974231
FGF2	0.0858989	0.959915	0.974231
C3	0.262312	0.943523	0.96145
SLC45A4	0.074313	0.942994	0.961392
SMAD4	-0.00654959	0.939844	0.95914
ABCA2	-0.26641	0.939027	0.95914
IFFO2	-0.215258	0.938616	0.95914
FGD4	0.0693996	0.937772	0.958946
RAB12	-0.0043017	0.936821	0.958454
KRT15	-0.10325	0.927929	0.952226
H3F3C	0.158592	0.927432	0.952194
EGR3	-0.0563514	0.925837	0.951036
DPYSL2	0.0218692	0.920521	0.946327
SCGB3A1	-0.244963	0.914247	0.943411
MYBL1	-0.239553	0.904192	0.935403
ZNF28	-0.0794925	0.903567	0.935351
HS2ST1	-0.0202335	0.885365	0.922579
ZBTB26	-0.0604412	0.883818	0.921812
FAM27C	-0.0695071	0.883689	0.921812
R3HDM2	-0.0130258	0.879398	0.918613
CLIC5	-0.202165	0.877643	0.91772
UBE2M	0.101178	0.874054	0.914437
CBX6	-0.0929714	0.87104	0.912689
FKBP1B	-0.149908	0.870745	0.912689
FBXL20	-0.142163	0.869839	0.912689
CBWD1	0.102515	0.868233	0.912689
GLIS2	0.104993	0.867689	0.912689
P2RY14	-0.317885	0.864026	0.910959
TRBV4-2	-0.232943	0.859923	0.907573
IGLV1-41	-0.0329911	0.857422	0.905402
LAMA3	0.0337663	0.857193	0.905402
PLXND1	0.0195192	0.855835	0.905133
TRBV27	-0.219905	0.852453	0.902962
MB21D2	-0.136515	0.851563	0.902846
MBIP	-0.001477	0.846554	0.898838
ZNF26	-0.178492	0.846107	0.898838
CCNB2	0.0032594	0.840435	0.895351
LZTR1	-0.10457	0.839283	0.89506
MIR210HG	0.178742	0.836857	0.893408
HIST1H4E	-0.146216	0.833998	0.891395
LIF	-0.252111	0.833822	0.891395
MTRNR2L1	0.0461842	0.831488	0.890375
STRIP2	-0.0488951	0.831095	0.890375
HPGD	-0.0929556	0.82807	0.888117
F2RL1	-0.0791448	0.827234	0.887991
PAQR7	-0.273801	0.823758	0.885453
KCNJ2	-0.251359	0.821565	0.884028
KCTD17	-0.312826	0.818298	0.881538
SCARF1	-0.0487895	0.813455	0.877154
PDGFB	0.0296877	0.813045	0.877154
HBB	-0.0804125	0.812254	0.876787
KIF26B	0.0274356	0.812118	0.876787
SLC35A1	-0.0443301	0.811805	0.876787
PDE7B	-0.321224	0.810346	0.876584
ZNF550	-0.14753	0.810177	0.876584
HCFC2	-0.0331793	0.808121	0.875107
LINC01481	-0.0872968	0.80361	0.871876
TAF1C	-0.160148	0.803106	0.871876
CSGALNACT1	-0.0262565	0.797069	0.866361
STC2	-0.138292	0.79452	0.864975
FAM69A	-0.174029	0.793635	0.864473
FGB	-0.0574779	0.791669	0.862793
NMU	-0.221831	0.790652	0.862145
TRAV8-4	-0.33077	0.787932	0.8601
ARHGEF11	-0.176718	0.786073	0.859243
CLN5	-0.0217177	0.785856	0.859243
KMT2D	-0.0279378	0.783622	0.857691
TRDV1	-0.449998	0.783542	0.857691
SCGB1D2	0.189055	0.776425	0.851644
IL23A	-0.410928	0.772392	0.848133
ZNF169	-0.518662	0.768988	0.84485
TRIM66	-0.306133	0.767494	0.844491
AP3M2	-0.179106	0.767362	0.844491
MRPL53	0.0756452	0.762721	0.840684
NOTCH1	-0.0760943	0.761022	0.83972
DGCR6	-0.202201	0.760269	0.839344
ZNF583	-0.388543	0.751122	0.832085
HIST1H2AL	-0.111776	0.750813	0.832085
ZDHHC2	-0.290873	0.747949	0.830692
DLGAP5	-0.0416492	0.74267	0.82618
TCTEX1D2	-0.0134323	0.741634	0.825478
SNHG9	-0.0313478	0.739788	0.824324
DLGAP1-AS2	-0.352076	0.739501	0.824324
ZNF165	-0.0411177	0.732198	0.817207
BAHCC1	-0.136131	0.729935	0.815127
IGLV3-21	-0.0155474	0.727863	0.813705
IGLV5-45	0.118587	0.724782	0.811151
ZMYM6	-0.116559	0.724606	0.811151
PIGR	-0.44293	0.71924	0.806277
NDUFAF1	-0.05258	0.717644	0.805374
BMP2	-0.41839	0.71728	0.805374
TOPORS	-0.0786386	0.71724	0.805374
MKI67	-0.0240548	0.717213	0.805374
SDR42E2	-0.588739	0.709451	0.798377
ALKBH6	-0.0500338	0.697538	0.788017
CCL22	-0.562522	0.696393	0.787159
C2orf40	-0.126408	0.69125	0.782214
FGG	-0.177669	0.689534	0.780706
CH25H	-0.192548	0.688253	0.780123
RNF217	-0.0650912	0.687406	0.779639
CBX7	-0.202081	0.686867	0.779639
TRAV8-6	-0.505651	0.684558	0.777664
MANEA-AS1	-0.37386	0.683443	0.776831
LINC01001	-0.200917	0.683177	0.776831
SCRG1	-0.467135	0.679947	0.774584
ZNF383	-0.149402	0.678979	0.773914
FAN1	-0.0942119	0.677666	0.77285
CXCL1	-0.00379154	0.67753	0.77285
LAMP5	-0.397504	0.674713	0.770344
KLHL15	-0.193149	0.674552	0.770344
TSIX	-0.546043	0.670352	0.767516
RMI2	-0.047641	0.669528	0.767434
DIO2	-0.225378	0.665143	0.764127
ZNF641	-0.174965	0.66507	0.764127
NPW	-0.185131	0.651301	0.751615
IGKV2-24	-0.518309	0.650143	0.750703
MMP1	0.0938564	0.650004	0.750703
UPRT	-0.142893	0.648581	0.749749
SPNS2	-0.034959	0.648543	0.749749
IGLV1-36	-0.314762	0.646261	0.74834
LRRC37B	-0.222369	0.642517	0.744851
IGHV3-74	-0.0480589	0.639048	0.741252
TRBV6-5	-0.57185	0.638351	0.740865
FAM41C	-0.500858	0.637116	0.740275
TRAV2	-0.694249	0.63297	0.736297
FAM3D	-0.367722	0.629909	0.733155
HIST1H1A	-0.18928	0.625238	0.728968
IGLV3-10	-0.278122	0.621648	0.726027
HK2	0.0853213	0.619778	0.724674
LRRN3	-0.890683	0.61958	0.724674
MED26	-0.191939	0.617028	0.722703
SMN1	-0.537432	0.614599	0.720944
SENP3	-0.360989	0.614248	0.720944
TRAV1-2	-0.994742	0.606853	0.714069
TRBV19	-0.524256	0.606603	0.714069
BACH2	-0.588603	0.604522	0.712972
SPC25	-0.125605	0.602802	0.711587
ZBTB10	-0.205827	0.600502	0.710286
TRAV12-1	-0.545026	0.599424	0.709423
NAF1	-0.144051	0.598137	0.708311
LINC00309	-0.64569	0.597814	0.708311
AL589743.1	-0.124639	0.595761	0.706318
IGHV3-43	-0.20516	0.595368	0.706263
RDH10	-0.153033	0.590759	0.701204
C16orf86	-0.428751	0.590712	0.701204
CES1	-0.438311	0.590428	0.701204
ATP10A	-0.212894	0.589187	0.700814
ELK3	-0.05838	0.588738	0.700814
IGLV8-61	-0.45184	0.588164	0.700814
ENG	0.0400228	0.587517	0.70062
TRAV16	-0.847094	0.586883	0.70062
HIST2H2BF	-0.421525	0.585358	0.699683
KLRF1	-1.0735	0.579876	0.694761
MMP3	-0.27933	0.577127	0.692437
TNS4	-0.16739	0.576822	0.692437
KLK1	-0.779943	0.574397	0.69104
FPGT	-0.183595	0.574256	0.69104
SERTAD4-AS1	-0.134833	0.568371	0.685408
SEMA6B	-0.569886	0.568289	0.685408
FXYD7	-0.555398	0.559859	0.678355
SLC41A1	-0.111799	0.559642	0.678355
PIP	-0.369952	0.556178	0.675098
JAKMIP2	-0.933359	0.554961	0.674028
GADD45G	-0.0573984	0.554496	0.674028
OLFML2B	-0.132969	0.551601	0.671543
IGLV2-8	-0.29296	0.547215	0.667799
ULK2	-0.39651	0.542971	0.664374
AGAP4	-0.769053	0.537732	0.659751
TRBV7-6	-0.879896	0.536534	0.659106
TRAV17	-0.745193	0.534431	0.656918
BHLHE40-AS1	-0.9349	0.532152	0.654907
NUAK2	-0.543677	0.529431	0.65292
ADRB2	-0.168545	0.519188	0.642834
TRAV4	-0.69722	0.514392	0.637671
AGAP9	-1.09653	0.512804	0.636089
WDR11	-0.0611773	0.511774	0.635585
IGHV3-20	-0.764448	0.508974	0.633652
TRGC1	-1.04139	0.508722	0.633652
TRAV38-2DV8	-1.07049	0.507184	0.633652
RPF1	-0.061075	0.50473	0.631067
TGM2	-0.0717568	0.504667	0.631067
IGHV4-61	-0.383414	0.50465	0.631067
IGHV1-69	-0.214775	0.502513	0.630228
SYNJ2BP	-0.0930622	0.502312	0.630228
CCDC144A	-0.431231	0.499915	0.628105
SUCLA2	-0.0931633	0.495782	0.623706
F8A1	-0.870796	0.492756	0.620665
MED14OS	-0.877047	0.492443	0.620654
SPRR1B	-0.784197	0.490426	0.618794
PSORS1C2	-0.881733	0.488959	0.617761
CENPM	-0.108422	0.487736	0.616629
TNFSF15	-0.773067	0.487272	0.616425
HAUS7	-0.663183	0.486773	0.616175
IGHV3-7	-0.166375	0.485527	0.614981
HSPB2	-0.259629	0.484259	0.614512
TRBV5-1	-0.712669	0.482942	0.613486
FBXO48	-0.269658	0.480745	0.611203
TRBV2	-1.14153	0.47915	0.609555
RTKN2	-0.246563	0.479141	0.609555
AGR3	-1.09474	0.475154	0.606365
KLRC3	-0.967086	0.472459	0.603303
ZNF525	-0.515945	0.469904	0.600793
PCDH9	-0.341347	0.469045	0.600071
GCSAM	-0.882665	0.468663	0.600071
LSMEM1	-0.598352	0.466159	0.597505
LRRC75A	-0.287843	0.464783	0.596491
CCL8	-0.212037	0.462293	0.593669
RIT1	-0.0798594	0.4589	0.590056
AKR1C2	-0.379177	0.457539	0.588678
DENND5A	-0.269848	0.455089	0.585895
GDPD3	-0.533437	0.454783	0.585871
NISCH	-0.112702	0.454192	0.58548
LYSMD3	-0.158002	0.451492	0.582367
PXDC1	-0.0626859	0.451386	0.582367
CCZ1B	-0.121138	0.451043	0.582367
AMIGO2	-0.444606	0.450711	0.582367
COCH	-0.891612	0.450168	0.582133
ZNF384	-0.252251	0.449546	0.581698
ENPP2	-0.226398	0.447599	0.579915
FCRL6	-1.20988	0.447178	0.579744
IGHV3-73	-0.157241	0.446458	0.579554
ENTPD3-AS1	-0.287035	0.441318	0.574333
PABPC3	-0.718213	0.437826	0.571613
IGHV3-64	-0.831351	0.437506	0.571563
SCGB2A1	-0.270045	0.437016	0.571289
CCNG2	-0.203852	0.43258	0.566943
FAAH2	-0.364643	0.431188	0.565484
DCTN6	-0.11217	0.428142	0.562213
CXCL6	-0.699062	0.425357	0.558915
IGLV3-27	-0.165829	0.422828	0.556821
POLR2J2	-0.957976	0.421693	0.555893
KBTBD3	-0.144263	0.421503	0.555893
SEC23A	-0.0448201	0.417239	0.551555
CDA	-0.470463	0.416915	0.551555
CCL23	-0.934847	0.416581	0.551555
SMCR5	-1.27439	0.41115	0.546235
SARNP	-0.239527	0.408573	0.54423
ST20	-0.0370836	0.407439	0.543785
ITPRIPL2	0.0273029	0.405206	0.54116
MXD4	-0.0992477	0.399311	0.534688
AC147651.4	-1.44087	0.39884	0.534409
IL12RB2	-0.56172	0.396913	0.532177
TRAV21	-1.08082	0.396137	0.531723
LINC00685	-1.29413	0.394317	0.529742
ZNF701	-0.484847	0.393217	0.528962
MAN1A1	-0.167707	0.391209	0.527304
TRAV12-2	-0.778608	0.390739	0.527019
KRT5	-0.223607	0.387857	0.523825
TRGV9	-0.989392	0.387227	0.523321
SH2D1B	-1.87222	0.385758	0.521682
PTGDR	-0.701654	0.384784	0.521056
STARD8	-0.933345	0.377794	0.512613
PCDHGA10	-0.863795	0.373517	0.508502
IGHV1-24	-0.717687	0.371871	0.506939
TRAV14DV4	-0.915119	0.367965	0.50195
IGKV2-30	-0.383477	0.367728	0.50195
KLRC2	-1.43447	0.366051	0.500343
NEK8	-0.688821	0.364587	0.498677
CCNA2	-0.191003	0.361944	0.49606
TRAV29DV5	-0.925538	0.361246	0.495437
ACY3	-2.64334	0.354351	0.486964
GLYATL2	-0.306143	0.351825	0.4848
TRAV3	-1.05751	0.348941	0.481847
TIFA	-0.164394	0.348528	0.481847
CCR8	-1.04303	0.344621	0.477455
SLAMF9	-1.31774	0.343451	0.476483
CXCL5	-1.818	0.342839	0.476282
IGHV3-33	-0.623628	0.341089	0.474174
BATF3	-0.616988	0.337515	0.469847
LPCAT1	-0.173793	0.335573	0.468103
CEBPB	-0.0442453	0.333948	0.466155
HEATR5A	-0.201027	0.331067	0.46245
IGHV1-18	-0.192496	0.328958	0.460767
FGA	-1.14398	0.327696	0.459632
CD160	-1.55397	0.32755	0.459632
IGHV3-49	-0.730119	0.326729	0.459224
CAPS	-0.487991	0.318813	0.450271
UBE2C	-0.109814	0.316964	0.448281
GNG4	-0.234396	0.315559	0.446619
GPNMB	-0.148964	0.314864	0.44655
CAPN12	-0.689646	0.313275	0.445226
RADIL	-1.17334	0.312147	0.443932
DNAJA4	-0.0258797	0.309756	0.441147
IGHV4-4	-0.964184	0.308898	0.440234
P2RX5	-2.25509	0.308733	0.440234
DISC1	-1.10722	0.30518	0.436155
RIN2	-0.066762	0.304548	0.435557
TRAV13-2	-1.23454	0.303676	0.434615
IGKV3-7	-1.53271	0.301206	0.432904
COMMD10	-0.0564562	0.299983	0.432061
B3GAT2	-1.1284	0.299151	0.431167
LINC01281	-1.35381	0.297239	0.429233
BLOC1S5	-0.462696	0.297084	0.429233
ASPM	-0.23368	0.292148	0.42347
HIST1H1B	-0.424747	0.290504	0.421826
TRAV8-2	-0.87647	0.290298	0.421826
VPS33A	-0.456754	0.288747	0.420334
F5	-1.36155	0.287708	0.41912
LRRC8C	-0.355824	0.28767	0.41912
DGKH	-0.276846	0.287104	0.418839
TRAV9-2	-1.43301	0.283375	0.414289
IGKV1D-13	-0.999472	0.281333	0.412191
TMEM38B	-0.169315	0.279825	0.410275
SBSPON	-0.367443	0.278912	0.409231
HPGDS	-2.73854	0.276318	0.40601
PALD1	-0.961283	0.274672	0.404175
TRBV9	-0.918602	0.271757	0.401625
IGHV3-48	-0.347245	0.269397	0.398737
TRGV3	-1.1896	0.267007	0.396618
AMFR	-0.152687	0.266719	0.39648
IGKV1-8	-0.269855	0.264823	0.394236
LAMP3	-0.983206	0.258607	0.387245
LAMB3	-0.169436	0.258316	0.387094
IGLV2-11	-0.143683	0.258106	0.387064
IGHV4-31	-0.933646	0.25785	0.386964
APOC2	-3.43179	0.257807	0.386964
CISH	-0.262745	0.253925	0.382482
BATF2	-0.726056	0.253095	0.381515
TSPAN2	-0.341375	0.248727	0.375764
IGLV3-19	-0.160431	0.248679	0.375764
FBXL3	-0.15341	0.245922	0.372354
STRIP1	-0.37032	0.244341	0.370511
RASA4	-0.472713	0.244212	0.370511
TRAV12-3	-1.07864	0.244185	0.370511
IGHV4-59	-0.525342	0.242126	0.368248
HMGCL	-0.200821	0.240839	0.367113
KLRG1	-0.553944	0.239535	0.365673
CCR4	-1.09497	0.233771	0.358484
CLDND1	-0.0718815	0.22955	0.353074
PI15	-0.638568	0.229278	0.352922
TNFSF9	-0.790854	0.228803	0.352456
IGKV2-29	-0.724586	0.22724	0.350845
C5orf46	-0.690819	0.225723	0.349562
GTF2IRD2	-0.393369	0.221501	0.344587
FCRL3	-2.09981	0.216839	0.337857
MIAT	-0.86801	0.216692	0.337857
FBXL17	-0.614162	0.216588	0.337857
IGLV3-9	-0.366888	0.215991	0.337311
FLCN	-0.421287	0.214998	0.336017
IGKV1D-16	-1.6607	0.213945	0.334628
RGS13	-3.0327	0.213533	0.334239
S100A7	-0.41139	0.21319	0.333959
GOLGA8A	-0.529463	0.213174	0.333959
CUL9	-0.509884	0.212624	0.333586
DTHD1	-1.40553	0.209352	0.329721
PTEN	-0.145025	0.209303	0.329721
C1orf54	-0.202695	0.204871	0.323916
HCAR3	-2.82507	0.204209	0.32312
PLA2G2D	-2.3208	0.203396	0.322334
IGKV1D-8	-2.18876	0.197536	0.314382
TRAV19	-1.24307	0.196508	0.313367
ACE	-0.808666	0.196119	0.312993
TRAV13-1	-0.819307	0.196023	0.312993
TRBV20-1	-0.657013	0.193567	0.309646
ICAM4	-0.817671	0.191932	0.307272
AARD	-0.229986	0.190855	0.305788
ARRDC2	-0.337895	0.189783	0.30431
TIMM10B	-0.169728	0.189683	0.30431
ZFHX3	-0.182801	0.189032	0.303823
IGLV3-25	-0.177443	0.187626	0.3018
NUSAP1	-0.19202	0.186003	0.299895
IER5	-0.170469	0.185278	0.298968
TRGC2	-1.69047	0.185037	0.298816
LINC00877	-2.56427	0.18181	0.294304
MTHFS	-0.125313	0.181797	0.294304
IGHV3-11	-0.460921	0.178727	0.290236
CBWD5	-0.1929	0.175378	0.285937
PAN3	-0.389802	0.175336	0.285937
CD109	-0.269408	0.174344	0.284706
METRN	-0.560473	0.171771	0.281406
KRT6A	-0.725469	0.168078	0.276022
IGLV6-57	-0.258102	0.166341	0.27361
CX3CR1	-2.39146	0.164818	0.271543
ABHD14A	-0.412038	0.164755	0.271543
TRGV10	-0.709061	0.16393	0.270518
RIOK2	-0.323521	0.157931	0.261502
HIGD1A	-0.0590946	0.157044	0.260419
KCNE1	-2.35836	0.156999	0.260419
PAX5	-6.11624	0.156255	0.259533
PRR5L	-0.964088	0.155857	0.259084
OTOA	-2.80171	0.15504	0.258146
ZFYVE28	-0.589618	0.152965	0.255108
IGKV3D-20	-1.6707	0.152659	0.254807
SDHAF2	-0.246099	0.151512	0.253099
IGHV2-26	-0.778767	0.149842	0.251134
CPNE7	-0.745448	0.149363	0.250536
KMT2E-AS1	-0.564826	0.149046	0.250211
MCEMP1	-3.31011	0.148869	0.250119
IGHV3-66	-0.441739	0.147417	0.248295
S100A8	-0.240009	0.146253	0.246742
SLC15A4	-0.543714	0.146078	0.246651
FBXO4	-0.359929	0.14353	0.243763
LAIR2	-1.17046	0.14134	0.240644
FAM234A	-0.237779	0.13968	0.238416
SUCNR1	-1.46885	0.13921	0.237812
C1orf56	-0.382515	0.134924	0.231071
SPON1	-0.740343	0.132529	0.227976
IGLV2-18	-0.520249	0.129825	0.224033
GPR25	-1.17627	0.128484	0.222095
SRGAP2C	-0.499279	0.128265	0.221905
CD1C	-4.02234	0.126786	0.21972
CASP14	-0.973934	0.126184	0.219235
ABHD17B	-0.666714	0.125827	0.218901
FCER2	-6.00973	0.125495	0.218597
IGHD	-4.40691	0.124342	0.21696
MT2A	-0.0951716	0.124306	0.21696
IGKV3D-11	-0.492038	0.124121	0.216946
SIGLEC14	-4.77899	0.123553	0.216138
IGHV3-23	-0.275988	0.120012	0.210124
ZBED2	-1.54249	0.118356	0.207403
TNFSF4	-1.54007	0.115385	0.202895
IGSF21	-1.71961	0.114451	0.201426
FOXK1	-0.35575	0.112547	0.198934
IGKV1-16	-0.402602	0.112343	0.198745
UTS2	-1.27203	0.111992	0.198296
HAMP	-4.9209	0.111849	0.198216
RRAGD	-0.611644	0.110734	0.196754
KIR2DL4	-2.14681	0.110344	0.196231
TRBV7-9	-0.955122	0.110135	0.19603
IGHV5-51	-0.49419	0.107568	0.192639
AC017002.1	-1.36763	0.102906	0.185104
LINC01235	-0.904647	0.10161	0.183095
SPIB	-2.92363	0.100232	0.180932
IGHV3-15	-0.55815	0.0986609	0.178571
TNFRSF13B	-1.80018	0.0941047	0.170932
BEST1	-0.269876	0.0902013	0.164281
CP	-1.47079	0.0896187	0.163483
APOBEC3F	-0.926082	0.0891842	0.162865
CDK1	-0.301701	0.0889245	0.162682
IGLV3-1	-0.145513	0.0886364	0.162301
TOP2A	-0.448266	0.0885393	0.162269
NDC80	-0.435821	0.0869505	0.159644
TTN	-1.11475	0.0829731	0.152893
FPR2	-4.39168	0.0820939	0.151547
NMB	-0.256782	0.0819435	0.151406
CD70	-0.368039	0.0815077	0.150737
ANKRD49	-0.364064	0.0798009	0.148119
PDS5B	-0.227584	0.0766769	0.143233
IKZF2	-1.13877	0.0766493	0.143233
VEGFB	-0.326812	0.0764875	0.143233
IGHV3-53	-0.545804	0.076472	0.143233
HOPX	-0.308932	0.0752291	0.141176
EOMES	-1.35711	0.0730107	0.137774
HIST1H1C	-0.0221263	0.0723242	0.136605
SERPINB4	-1.5662	0.071148	0.135009
IGKV3D-15	-1.54088	0.0709699	0.134797
IGHG2	-1.03438	0.0699254	0.133061
QPCT	-0.623477	0.068141	0.130151
CD40LG	-0.615924	0.0670912	0.128387
MAL	-0.818869	0.0666371	0.127694
MIR3945HG	-3.52248	0.0655307	0.125992
IGKV1-39	-1.12565	0.0650986	0.125398
FAM129C	-4.49255	0.064716	0.124897
RBM7	-0.230681	0.0632322	0.122381
CGREF1	-1.3322	0.0632061	0.122381
AFF3	-2.19936	0.0623368	0.120993
LEF1	-0.660265	0.062115	0.120677
SDHD	-0.212629	0.062034	0.120677
TNIP3	-0.770071	0.0618823	0.12057
MED6	-0.33558	0.0611996	0.119468
PIGB	-0.605542	0.0601905	0.117837
IGKV1D-39	-0.809474	0.0597451	0.11719
PPP1R16B	-0.615013	0.0596521	0.11712
MT1G	-0.584817	0.0586391	0.115577
CBWD3	-1.09164	0.0577822	0.113998
ANPEP	-0.39918	0.0573946	0.113674
TRGV5	-1.33802	0.0569519	0.113127
HCAR2	-3.59738	0.0543543	0.10839
PRR34-AS1	-0.545716	0.0540365	0.107967
BORCS8	-0.483625	0.0539377	0.107875
SPTSSB	-0.544551	0.053711	0.107527
IGHV4-34	-0.4499	0.0504363	0.101818
TXK	-1.61278	0.0491235	0.0996157
CCDC84	-0.439232	0.0490502	0.0995661
JAKMIP1	-0.642663	0.0483281	0.0981981
IGLV7-46	-0.610651	0.0477804	0.0972792
MMP7	-0.592813	0.0469396	0.0956738
CD22	-5.09874	0.0464303	0.0949098
IGHV3-30	-0.333388	0.0462245	0.0945838
BLK	-3.34164	0.045628	0.0935512
IGKV1-17	-0.745921	0.044854	0.0920569
CXCL3	-0.361635	0.044685	0.0918252
SLC2A5	-1.6312	0.0446719	0.0918252
ITPR1	-0.406137	0.0422486	0.0878599
NFIL3	-0.572437	0.0420967	0.0876333
VASH1	-1.0094	0.0417651	0.087032
PLEKHF1	-0.483669	0.0405394	0.0848248
RAB4B	-0.583138	0.0400814	0.0841851
TCL1A	-3.80629	0.0399395	0.0840007
HNRNPH2	-0.271407	0.0388488	0.0819605
IL10RB-AS1	-2.39905	0.0384713	0.0812482
GRASP	-0.975465	0.0384637	0.0812482
SACM1L	-0.476018	0.0384034	0.0812482
ING3	-0.42013	0.0366624	0.0777502
TRDC	-1.49896	0.0364978	0.0774818
NELL2	-0.79557	0.0362921	0.0771255
IGKV1-6	-0.8491	0.0359053	0.0763832
RALGPS2	-0.431898	0.0357941	0.0762262
IGKV1-27	-0.691819	0.0345033	0.0738631
PASK	-0.65972	0.0327683	0.0702226
RHCG	-1.38971	0.0325245	0.0698471
FCRLA	-3.46503	0.0305464	0.0662976
HLA-DQB2	-2.84658	0.0292558	0.0638365
P2RX1	-2.33477	0.0289939	0.0633328
SIK1	-1.80478	0.027082	0.0596037
TNFRSF11B	-0.917065	0.0266299	0.0587356
KRT14	-0.590009	0.0266266	0.0587356
STAG3	-1.57488	0.0262627	0.0581143
IGLV1-51	-0.258844	0.0262257	0.0580955
CCL13	-2.4564	0.0260586	0.0577882
STAP1	-2.49511	0.0252313	0.0562598
GPR18	-1.94907	0.0249039	0.0558351
IL1R2	-2.33135	0.0240855	0.0540597
TRAF5	-0.661293	0.0229595	0.0519328
KRT81	-0.891743	0.0227608	0.0515405
S100A12	-2.45898	0.0225649	0.0511537
ARHGAP24	-1.11239	0.0221627	0.0505231
SCGB2A2	-0.318734	0.0215182	0.0491637
JCHAIN	-0.0648673	0.0213801	0.048903
PLTP	-0.359308	0.0210648	0.048236
IRAK3	-1.06654	0.0198788	0.0458812
TMIGD2	-2.10741	0.0195262	0.0451695
C1orf228	-1.05526	0.0192868	0.0447682
NDUFA13	-0.178368	0.0192371	0.0447365
LLPH	-0.362445	0.0180957	0.0424385
CXCL11	-1.30735	0.0180547	0.042391
TBC1D4	-0.430287	0.0180219	0.042363
FCGBP	-2.76758	0.0176874	0.0416245
IDO1	-1.63883	0.0165956	0.0392364
SERPINB3	-1.40968	0.0155583	0.0370853
S100A1	-0.684109	0.0153492	0.0366725
LINC01480	-1.84207	0.0148806	0.0357205
LINC00926	-3.19519	0.0140292	0.0339566
HHEX	-1.05179	0.0140056	0.0339399
SNHG25	-1.41846	0.0131974	0.0321799
TNFRSF13C	-3.09231	0.0129158	0.0315995
BTLA	-1.77724	0.0120456	0.0296842
ZCCHC10	-0.365098	0.0116485	0.0287405
CTSL	-0.292991	0.0115167	0.0285536
ANKRD28	-0.27758	0.0113886	0.0282703
DNAAF1	-2.29039	0.011233	0.0279523
NACA2	-0.981838	0.0111843	0.027865
EGLN2	-0.444691	0.0107782	0.0270023
CCL18	-2.55996	0.01068	0.0268384
GIMAP1	-1.09553	0.0105195	0.0265332
ARHGEF10L	-0.816811	0.00995917	0.0252762
FABP3	-1.8127	0.00940761	0.0239959
RASSF3	-0.85851	0.0090447	0.0231572
CCL20	-1.41822	0.00898661	0.0230374
LUCAT1	-2.08376	0.00897351	0.0230328
GJB2	-1.07606	0.00845632	0.0217601
TMED7	-0.500671	0.00821687	0.0211971
PRCP	-0.184645	0.00817314	0.0211114
CFP	-2.8176	0.00808076	0.0208992
TNFSF12	-0.863228	0.00776343	0.0202326
CCR6	-1.65483	0.00773305	0.0201792
TNFSF8	-0.909502	0.00769486	0.0201053
TNFRSF25	-0.746585	0.00743595	0.0195038
DERL3	-0.429167	0.00713229	0.0187799
NDUFC2	-0.366935	0.00697041	0.018425
TNFRSF17	-1.49054	0.00682891	0.0181126
MARCO	-0.52384	0.0068243	0.0181126
CA2	-0.734964	0.00655473	0.017485
HLA-DOB	-2.01837	0.00646472	0.0172901
RBAK-RBAKDN	-1.11761	0.00641827	0.0171885
HIST1H1D	-0.499621	0.00632853	0.0169705
DUSP5	-0.39534	0.00607268	0.0163273
CLEC5A	-3.88969	0.00605635	0.016305
TLE4	-0.560299	0.00603518	0.0162694
FOXP3	-1.23712	0.00531588	0.014503
MMD	-0.676168	0.00457734	0.0126575
PTGS2	-1.44163	0.00454279	0.0125962
CD300E	-5.5428	0.0042612	0.0118638
ALKBH5	-0.375336	0.00425081	0.0118511
GPR171	-0.956848	0.00421243	0.0117602
LINC00861	-0.967468	0.00420294	0.0117498
MMP19	-0.868859	0.00368732	0.0104007
HSPA6	-0.435788	0.00362601	0.0102494
TNFSF14	-1.29689	0.0034637	0.00983151
APOBR	-2.70941	0.00341333	0.00970204
COMMD3	-0.47215	0.00331311	0.00944352
FCRL5	-2.43222	0.00326322	0.00931435
CPNE5	-1.70354	0.00323553	0.00925444
NDUFA9	-0.426351	0.00319197	0.0091623
HRH2	-1.24511	0.00313461	0.00902308
CHI3L1	-0.781346	0.00309794	0.00893013
PPAN	-1.12572	0.00304047	0.00880182
KLRC1	-1.43261	0.00296336	0.0085908
LCN2	-1.01483	0.00291631	0.00846644
FURIN	-0.762965	0.00274197	0.00798305
PLD4	-3.30939	0.00265325	0.00773579
SAMD3	-0.919403	0.00264402	0.00771993
ADAMDEC1	-2.38515	0.00243511	0.0071716
THEMIS	-1.22341	0.00234086	0.006904
IGKV1-12	-1.21788	0.00220048	0.00651827
IGHM	-0.884366	0.00191677	0.00573623
CCDC82	-0.450085	0.00187428	0.00561731
LILRA5	-4.80957	0.00174729	0.00529906
CD19	-4.08839	0.00173382	0.00526607
VPREB3	-4.1477	0.00169618	0.00517488
MCTP1	-0.583993	0.00166938	0.00510075
PYCR2	-0.606225	0.00157046	0.00482017
ANKH	-0.673735	0.00151361	0.00466678
EBI3	-2.56843	0.00144791	0.00447776
JSRP1	-2.12168	0.00142524	0.00441433
CORO7	-1.58551	0.00140555	0.00436
ERAP2	-0.653666	0.00131601	0.00410095
LTA	-1.42942	0.00124833	0.00390798
FCGR3B	-4.66065	0.00121866	0.00382686
KLK6	-1.37421	0.00118633	0.00373685
EREG	-2.52765	0.00115834	0.00366568
KRT17	-0.693586	0.00110923	0.00353774
WFDC2	-0.889535	0.00101625	0.00325647
KRT6B	-0.892475	0.000995573	0.00319524
S100B	-1.60245	0.00096806	0.00311676
IFIT1	-0.624498	0.000967506	0.00311676
AC133644.2	-1.04254	0.000951344	0.00307916
KRT86	-1.40722	0.000941845	0.0030565
UBE2W	-0.690588	0.000937692	0.00304787
AQP9	-3.89159	0.000850566	0.00279589
APOBEC3A	-2.93259	0.000836599	0.00275888
CHURC1	-0.276577	0.000829959	0.00274142
PI3	-1.66767	0.000825851	0.00273228
NCR3	-1.63591	0.000719149	0.00239481
GZMK	-0.630617	0.000673716	0.00224719
EEF1E1	-0.745047	0.000614827	0.00206088
NRP2	-0.560884	0.000577588	0.00195244
KRT16	-0.880328	0.00056512	0.00191952
CREBRF	-0.563211	0.000553093	0.00188181
RORA	-0.511936	0.000537845	0.00183299
PSMA2	-0.440982	0.000439476	0.00151292
PTGER2	-1.01191	0.000386587	0.00134219
IGHG1	-0.658941	0.000371459	0.00129407
CSGALNACT2	-0.76808	0.000322777	0.00113222
PDE3B	-1.02524	0.000309742	0.00109214
CWF19L2	-0.646346	0.000283857	0.00100609
C6orf15	-1.64169	0.000273612	0.000973544
ZBED6	-1.10069	0.000269287	0.00096282
S100A2	-0.965745	0.000237012	0.000853411
XCL1	-0.957733	0.000228646	0.000826207
FASLG	-1.26721	0.000213971	0.00077593
ADAM19	-1.28735	0.000213778	0.00077593
CPM	-0.53396	0.000212324	0.000772708
TMBIM4	-0.40849	0.000204598	0.000745922
SCML4	-0.971274	0.00019857	0.000725244
LYVE1	-3.10466	0.000196958	0.000720646
TRG-AS1	-1.46062	0.000183132	0.000672474
OTUD1	-1.66288	0.000180227	0.000663001
SLAMF1	-1.01734	0.000161294	0.000595501
TNFRSF4	-0.924074	0.000155879	0.000576554
MATK	-1.24931	0.000153812	0.000570982
THBD	-0.975649	0.000150917	0.000561412
GAPT	-5.04561	0.000115105	0.000432812
CRTAM	-1.25656	0.000113789	0.000428655
SAA2	-1.56167	0.000103865	0.000393451
EED	-0.650154	9.23303e-05	0.000354368
TMEM176B	-0.475906	9.07813e-05	0.00034908
NDUFA7	-0.952416	8.32962e-05	0.000321511
BANK1	-4.02782	8.0197e-05	0.000311911
GNLY	-1.02268	7.22889e-05	0.000283863
TCF7	-0.872572	7.19102e-05	0.000282921
TREM1	-3.92727	6.4171e-05	0.000253451
PMF1	-0.781278	5.55712e-05	0.000221199
CLEC4E	-3.87087	5.34836e-05	0.000213725
RASGRP2	-1.09639	5.04512e-05	0.000203201
XCL2	-1.34761	4.98578e-05	0.000201208
CLIC3	-0.867793	4.08207e-05	0.000165722
IGLL5	-1.55902	3.91461e-05	0.000159241
TMIGD3	-5.69782	3.81424e-05	0.00015578
CCZ1	-0.807516	3.81003e-05	0.00015578
LY6D	-1.6948	3.71616e-05	0.000152385
IFIT2	-0.969502	3.47778e-05	0.000143186
RNU12	-1.12769	3.26472e-05	0.000135037
PLIN2	-0.323331	3.23024e-05	0.000134078
POU2AF1	-1.76155	2.60762e-05	0.000109124
SETDB2	-1.12955	2.35784e-05	9.96945e-05
TESC	-0.997024	2.32458e-05	9.86977e-05
SRP19	-0.742115	1.68043e-05	7.24039e-05
CLECL1	-2.18727	1.50197e-05	6.54063e-05
MRPL23	-0.946456	1.5002e-05	6.54063e-05
NDUFB8	-0.539303	1.40181e-05	6.14384e-05
CXCL9	-1.18185	9.45604e-06	4.18944e-05
MT1F	-0.458813	9.09585e-06	4.03864e-05
CXCL17	-1.55174	8.60926e-06	3.86469e-05
ARRDC3	-0.688544	8.50767e-06	3.82751e-05
LRMP	-1.44031	8.3512e-06	3.76543e-05
ANKRD22	-1.96605	8.10219e-06	3.66126e-05
CDKN2A	-0.597024	7.39389e-06	3.36356e-05
C2	-1.41575	7.38434e-06	3.36356e-05
SDS	-3.46184	6.33666e-06	2.91515e-05
IFIT3	-0.681518	5.31941e-06	2.45827e-05
PRSS21	-2.58327	4.03353e-06	1.90286e-05
IRF4	-1.46818	3.9131e-06	1.85032e-05
GLA	-0.468366	3.73332e-06	1.76942e-05
CD93	-1.01777	2.74549e-06	1.30731e-05
SAA1	-1.3426	2.64081e-06	1.26337e-05
LGMN	-0.458949	2.52055e-06	1.20868e-05
DAB2	-0.803139	2.29701e-06	1.10669e-05
CTLA4	-1.25595	2.04103e-06	9.85692e-06
G0S2	-1.52599	1.60546e-06	7.80892e-06
SLC5A3	-0.678669	1.58084e-06	7.70752e-06
TOX	-1.44263	1.37815e-06	6.76788e-06
FCN1	-3.80317	1.07901e-06	5.38974e-06
LGALS2	-3.9133	1.05136e-06	5.2775e-06
CD209	-5.27016	1.01991e-06	5.14501e-06
SPP1	-1.34674	8.34003e-07	4.2599e-06
PYHIN1	-1.31394	8.22928e-07	4.21389e-06
TNFRSF9	-1.9089	7.30568e-07	3.75037e-06
KLRB1	-1.06428	6.63118e-07	3.42135e-06
BRI3	-0.482651	5.10739e-07	2.6758e-06
KLRD1	-1.32796	4.74347e-07	2.49798e-06
MS4A1	-2.9901	4.20332e-07	2.22503e-06
IL10	-4.55497	3.90123e-07	2.0759e-06
CD79B	-1.45081	3.66845e-07	1.96228e-06
TAP2	-1.01315	3.57441e-07	1.91701e-06
MT1X	-0.437986	2.80503e-07	1.51234e-06
MMP9	-1.83292	2.41336e-07	1.31509e-06
CFD	-0.426226	2.41078e-07	1.31509e-06
P2RY10	-1.19631	2.35673e-07	1.29114e-06
CXCL8	-1.05998	2.34264e-07	1.28688e-06
LY9	-1.47327	2.01795e-07	1.12673e-06
PDCD1	-1.34827	1.78015e-07	1.00497e-06
CXCL10	-1.01934	1.59446e-07	9.05157e-07
HAPLN3	-0.820652	1.50028e-07	8.56465e-07
RSAD2	-1.34438	1.25321e-07	7.17426e-07
CD40	-1.04948	1.02708e-07	5.91295e-07
NLRP3	-2.65877	1.01726e-07	5.873e-07
PLCG2	-1.35585	1.00689e-07	5.82964e-07
CXCL13	-1.22543	9.43174e-08	5.47632e-07
LDLRAD4	-0.570751	8.81402e-08	5.14699e-07
RBKS	-0.804707	8.7799e-08	5.14179e-07
MEF2C	-0.659982	8.25131e-08	4.87425e-07
ZNF683	-1.17305	6.75089e-08	4.01117e-07
GZMH	-1.20009	5.6607e-08	3.39309e-07
CLEC10A	-4.60435	5.07134e-08	3.05491e-07
CD81	-0.459279	4.89629e-08	2.96102e-07
CCRL2	-2.09021	4.51804e-08	2.74859e-07
IFNG	-1.28116	3.46391e-08	2.12634e-07
VMO1	-2.57364	2.06017e-08	1.28398e-07
IL4I1	-2.10895	1.65565e-08	1.03503e-07
IL2RA	-2.10064	1.56494e-08	9.8134e-08
PECAM1	-0.554428	1.46884e-08	9.23919e-08
TNF	-0.948737	1.12911e-08	7.21356e-08
HVCN1	-1.95065	9.6368e-09	6.19552e-08
IL7R	-0.558978	8.85134e-09	5.72668e-08
CCR7	-1.10142	4.71653e-09	3.10074e-08
ITGAM	-3.4595	3.25734e-09	2.16237e-08
ATP6V1B2	-0.611284	1.73796e-09	1.17284e-08
ICOS	-1.19418	1.57968e-09	1.08033e-08
PLAC8	-2.14204	1.19822e-09	8.2221e-09
APOC1	-1.07484	7.90453e-10	5.51693e-09
ITGAX	-3.54519	7.66918e-10	5.38958e-09
RNASE1	-1.09638	5.5573e-10	3.98795e-09
OSM	-2.7433	4.51317e-10	3.26165e-09
CXCR6	-1.49511	4.29519e-10	3.12629e-09
IGHG3	-1.29158	3.50514e-10	2.56039e-09
METRNL	-1.51064	2.68289e-10	1.99552e-09
PLA2G7	-1.93884	2.66631e-10	1.99046e-09
CMPK2	-1.41799	2.1025e-10	1.587e-09
ADAM8	-1.37233	1.80264e-10	1.37595e-09
CHMP4A	-0.975362	1.61571e-10	1.23947e-09
ZBP1	-1.54086	3.44302e-11	2.77347e-10
MZB1	-1.29908	3.15315e-11	2.57045e-10
BATF	-0.580927	2.57402e-11	2.10677e-10
FPR1	-4.94097	2.25235e-11	1.85842e-10
PTK2B	-1.87473	2.20694e-11	1.82835e-10
CD8B	-1.18053	1.9869e-11	1.65955e-10
CD72	-3.32579	1.59782e-11	1.3456e-10
ZNF267	-1.04247	1.05164e-11	8.93021e-11
CXorf21	-2.93897	8.05463e-12	6.8972e-11
TNFRSF18	-1.50954	7.05784e-12	6.09486e-11
AQP3	-0.965721	6.75643e-12	5.88445e-11
HBEGF	-1.16965	3.37356e-12	3.00232e-11
CD8A	-1.11634	2.98002e-12	2.66372e-11
IL1RN	-2.6323	2.46181e-12	2.21998e-11
OLR1	-4.27728	1.94965e-12	1.78179e-11
ARL6IP1	-0.587037	1.66624e-12	1.52964e-11
IL2RB	-1.49708	1.06392e-12	9.85574e-12
FCMR	-1.15947	5.93585e-13	5.60058e-12
ADAM28	-3.37127	5.88947e-13	5.58267e-12
IGHG4	-1.67933	4.87615e-13	4.70976e-12
TREM2	-3.18049	3.7358e-13	3.6255e-12
CRIP1	-0.643409	2.48545e-13	2.44703e-12
CPVL	-1.7861	1.64171e-13	1.6321e-12
FOLR2	-5.04213	1.05304e-13	1.05719e-12
NPL	-2.58181	6.52844e-14	6.58661e-13
S100A9	-0.761317	4.0971e-14	4.19592e-13
PHACTR1	-2.56307	2.15367e-14	2.26246e-13
F13A1	-4.23252	1.79726e-14	1.89783e-13
FBP1	-2.31953	7.69766e-15	8.38921e-14
OASL	-1.15443	4.89685e-15	5.39448e-14
SLC11A1	-2.90797	3.9383e-15	4.3621e-14
IRS2	-1.38301	3.38782e-15	3.77288e-14
PRF1	-1.51694	2.92276e-15	3.27284e-14
SOD2	-0.541749	2.14631e-15	2.41667e-14
GZMB	-1.49744	9.67363e-16	1.12656e-14
STAB1	-2.80024	6.40149e-16	7.54118e-15
MIR155HG	-1.7175	4.65825e-16	5.55177e-15
TRBC1	-1.29744	8.99469e-17	1.09768e-15
HMOX1	-1.50924	1.24749e-17	1.60911e-16
MRC1	-4.41925	7.2681e-18	9.49512e-17
FABP5	-0.648849	5.3228e-18	6.99862e-17
STXBP2	-1.34937	5.26652e-18	6.96959e-17
CTSW	-1.41402	6.47003e-19	8.79061e-18
RASGEF1B	-1.47058	1.61829e-19	2.21348e-18
SLCO2B1	-3.83516	8.47728e-20	1.16734e-18
MSR1	-4.17529	4.5939e-20	6.45681e-19
GZMA	-1.23662	3.60627e-20	5.10388e-19
LAG3	-1.57092	3.02692e-20	4.3139e-19
TIGIT	-1.58941	2.15304e-20	3.11198e-19
FPR3	-4.9736	7.93326e-21	1.18015e-19
FCGR2B	-4.00099	4.2226e-21	6.42213e-20
IL1B	-3.3759	1.29121e-21	2.03991e-20
PTPN22	-1.42857	1.1237e-21	1.80324e-20
VSIG4	-4.5896	6.61818e-22	1.07046e-20
EVI2B	-2.66184	3.46316e-22	5.69188e-21
CCL4L2	-1.64224	1.91294e-22	3.19555e-21
FCGR1A	-4.23881	9.62775e-23	1.6216e-21
[truncated: 39 more rows]

## Sheet: 5.DEGAS Differential Genes
Gene	logfoldchanges	pvals	pvals_adj
ADIRF	3.00968	6.63539e-221	6.76146e-218
IGFBP7	2.40396	5.25267e-195	2.67624e-192
CST3	1.64657	3.92237e-187	1.59876e-184
S100A9	2.33014	3.67942e-157	1.24978e-154
A2M	2.22781	6.90968e-154	2.0117e-151
SPARCL1	2.54189	1.80079e-120	4.0778e-118
GSN	1.15878	1.78392e-114	3.02968e-112
MYL9	2.05818	6.22898e-100	9.06762e-98
S100A8	2.2776	2.67997e-93	3.64118e-91
MEF2C	1.50566	2.70733e-92	3.44846e-90
ID3	1.24305	3.75224e-89	4.49827e-87
SPARC	1.64245	1.04937e-87	1.18813e-85
TIMP1	1.06949	1.1549e-87	1.23878e-85
NDUFA4L2	3.06487	1.39996e-87	1.42656e-85
EPAS1	1.78303	5.10249e-86	4.95185e-84
CALD1	1.17191	3.57166e-76	2.91162e-74
TGFBI	1.2384	1.45825e-67	1.0614e-65
CEBPD	1.00699	4.41162e-66	3.1003e-64
TPM2	1.42386	1.46579e-65	9.95762e-64
TAGLN	1.96225	7.21676e-64	4.59617e-62
CD93	1.94284	2.43938e-63	1.5065e-61
IGFBP4	1.19846	9.37913e-63	5.62196e-61
NNMT	1.33557	7.48504e-62	4.35843e-60
CTSL	0.962637	7.92485e-61	4.48634e-59
GPX3	1.77774	8.78246e-58	4.71017e-56
CPE	2.06295	3.69994e-57	1.93346e-55
GAS6	1.43229	8.91558e-57	4.54249e-55
RNASE1	1.58595	5.33415e-56	2.65146e-54
HBEGF	1.3721	9.87521e-56	4.79183e-54
SERPING1	1.0245	2.14994e-54	9.73685e-53
FABP5	0.947755	3.21035e-54	1.42232e-52
ACTA2	1.5131	6.71032e-54	2.90971e-52
CD14	1.26946	9.83231e-53	4.17464e-51
NRP1	1.60616	6.47633e-50	2.63975e-48
COL18A1	1.93869	8.88094e-50	3.54889e-48
CEBPB	0.821493	8.65905e-49	3.32965e-47
KRT17	2.41049	6.47907e-48	2.44525e-46
RGS5	3.73219	3.88046e-46	1.43789e-44
S100A7	2.95198	1.3023e-45	4.73944e-44
EGR1	0.762652	7.02085e-45	2.46698e-43
CD81	0.835802	7.51882e-44	2.51203e-42
CD36	2.1374	1.12494e-43	3.69779e-42
ENG	1.17928	2.10925e-43	6.82326e-42
S100P	2.19677	7.82765e-42	2.38101e-40
DAB2	1.20015	3.55321e-41	1.06492e-39
PECAM1	1.19161	1.93899e-40	5.72706e-39
THBD	1.6419	8.4302e-40	2.45439e-38
CXCL2	0.994252	1.02476e-39	2.9415e-38
PLAUR	0.796738	1.64981e-39	4.6059e-38
COL4A2	1.73122	8.51618e-39	2.3454e-37
CXCL8	1.48117	3.94071e-38	1.05673e-36
CD68	0.826754	1.52635e-37	4.03987e-36
ESAM	2.78766	9.34527e-37	2.35132e-35
SERPINA1	0.966776	3.46255e-36	8.50202e-35
PLTP	0.979451	3.72521e-36	9.03806e-35
SNCG	2.6657	4.14854e-36	9.94674e-35
HES1	0.889346	1.14183e-35	2.67477e-34
SOD2	0.630364	1.16898e-35	2.70725e-34
STAB1	1.56988	2.79511e-35	6.4005e-34
MCAM	2.41958	1.60293e-34	3.62975e-33
SERPINB3	3.40383	2.62231e-34	5.87283e-33
CRIP2	0.739218	9.56463e-34	2.11877e-32
CAV2	1.02919	1.37981e-33	3.00534e-32
KRT6A	3.49547	1.38617e-33	3.00534e-32
MYLK	1.91846	1.55565e-33	3.33727e-32
CSRP2	0.950959	1.992e-33	4.22885e-32
COL4A1	2.01746	2.1426e-33	4.50166e-32
FCGR2A	1.20058	2.49553e-33	5.18968e-32
GNG11	1.59166	4.25602e-33	8.76139e-32
PPP1R14A	2.97239	1.87307e-32	3.81732e-31
TINAGL1	1.41758	4.28905e-32	8.65454e-31
CCL2	1.0594	1.50345e-31	3.00396e-30
ID1	1.26364	1.61769e-31	3.20083e-30
TFPI	1.50051	2.66164e-31	5.16612e-30
BGN	1.35736	2.88224e-31	5.54152e-30
FCER1G	0.87346	5.20901e-31	9.73942e-30
PRSS23	1.09933	2.15753e-30	3.99731e-29
AIF1	0.990295	9.14884e-30	1.67976e-28
NDUFB8	1.01697	5.59629e-29	1.01833e-27
PLXND1	1.1259	7.6412e-29	1.37812e-27
AKR1C2	2.83079	8.262e-29	1.47701e-27
PTK2	0.976489	5.15035e-28	9.04863e-27
PTP4A3	1.47374	5.75149e-28	1.00184e-26
C1orf54	1.18893	6.44579e-28	1.11326e-26
MAP1B	1.32378	8.61156e-28	1.47482e-26
MS4A7	1.11587	1.0452e-26	1.77509e-25
LGMN	0.657146	2.56574e-26	4.28604e-25
BRI3	0.697967	5.01429e-26	8.30822e-25
EPS8	1.09492	8.67065e-26	1.42506e-24
CPM	0.961687	8.98396e-26	1.46475e-24
ADAMTS1	1.93312	1.18932e-25	1.90852e-24
FURIN	1.3198	1.48968e-25	2.37185e-24
MS4A6A	1.00246	2.67556e-25	4.22697e-24
EGFL7	1.28899	4.47424e-25	7.01423e-24
C15orf48	0.93008	2.29477e-24	3.51635e-23
C11orf96	2.61374	2.49859e-24	3.8001e-23
AK1	0.876265	3.96321e-24	5.98298e-23
C5AR1	1.19219	6.09595e-24	9.13496e-23
F13A1	1.57058	8.08629e-24	1.20291e-22
EHD2	1.6271	1.02417e-23	1.5125e-22
TGFB1I1	1.49684	1.15902e-23	1.69934e-22
STEAP4	1.6926	1.44548e-23	2.1042e-22
CFD	0.729394	1.65263e-23	2.37187e-22
NOTCH3	1.34445	2.93194e-23	4.14952e-22
OLFML2B	1.46148	3.46757e-23	4.87374e-22
PSMA2	0.915589	4.07676e-23	5.69071e-22
HES4	0.682092	1.07299e-22	1.48758e-21
TUBB6	0.822981	1.11659e-22	1.53758e-21
SOD3	1.50568	1.15301e-22	1.57707e-21
GJA4	3.32853	1.30049e-22	1.76694e-21
SGK1	0.553725	1.34514e-22	1.81549e-21
CD163	1.23262	2.86631e-22	3.79321e-21
C2	1.37961	3.17179e-22	4.17039e-21
VSIG4	1.30996	3.37871e-22	4.41398e-21
IL1B	1.16682	3.57375e-22	4.63904e-21
MRC1	1.40592	2.27155e-21	2.91159e-20
FGG	2.6528	8.705e-21	1.10191e-19
PGF	2.30574	9.80064e-21	1.23294e-19
G0S2	1.42226	1.35299e-20	1.69165e-19
TIMP3	0.828383	2.92821e-20	3.63884e-19
NR2F2	1.2439	2.96334e-20	3.66017e-19
ZFHX3	1.05636	3.9537e-20	4.85401e-19
SERPINB4	3.38898	5.32418e-20	6.49741e-19
FCGR3A	0.894193	6.06681e-20	7.35961e-19
S100A12	2.80489	6.54279e-20	7.89006e-19
S100A2	1.34341	6.75481e-20	8.07139e-19
KRT81	1.84147	6.77236e-20	8.07139e-19
SEPT4	2.00985	8.88797e-20	1.05312e-18
RHOC	0.550687	1.40367e-19	1.65357e-18
BAG3	0.554516	1.57326e-19	1.8427e-18
MS4A4A	1.16745	2.0665e-19	2.39839e-18
FILIP1L	1.22202	3.2668e-19	3.75753e-18
PLS3	1.47282	3.28185e-19	3.75753e-18
FABP4	2.56913	4.2265e-19	4.78534e-18
ADGRF5	2.77618	4.79515e-19	5.39918e-18
ANGPT2	2.6013	4.9974e-19	5.59598e-18
ADM	1.09759	5.13561e-19	5.71933e-18
SLCO2B1	1.19649	6.42712e-19	7.08025e-18
MSRB2	0.725084	1.20435e-18	1.31804e-17
C1QC	0.95287	1.20939e-18	1.31804e-17
HYAL2	1.06459	1.86442e-18	2.02111e-17
COX7A1	1.70711	3.09344e-18	3.31812e-17
FOLR2	1.45095	6.35225e-18	6.76172e-17
C1QA	0.925947	6.37022e-18	6.76172e-17
SLC11A1	1.1496	8.64204e-18	9.12564e-17
RGS16	0.787127	9.44631e-18	9.9235e-17
PLAC9	1.81051	1.38313e-17	1.44555e-16
NRP2	0.902346	1.57326e-17	1.63587e-16
JAG1	1.31503	2.16873e-17	2.24359e-16
DEFB1	1.31357	2.66203e-17	2.74001e-16
MYO1B	0.893197	5.14113e-17	5.26513e-16
RBPMS	0.99845	8.43697e-17	8.59727e-16
LYZ	0.628497	1.22876e-16	1.24588e-15
PLAU	0.79327	1.30104e-16	1.30688e-15
MSRB3	1.78724	1.30175e-16	1.30688e-15
MMP14	0.715602	1.32289e-16	1.32159e-15
S100A14	0.945309	5.8866e-16	5.85215e-15
CXCL1	1.22918	1.5593e-15	1.54265e-14
HMGB3	0.66127	3.78804e-15	3.72949e-14
KIFC3	1.00555	4.53269e-15	4.44116e-14
PKIG	0.581461	1.02536e-14	9.85696e-14
C9orf3	1.121	1.11065e-14	1.06268e-13
MSR1	1.02457	1.52456e-14	1.44515e-13
PROCR	1.46882	1.65153e-14	1.55825e-13
PTEN	0.524076	1.92478e-14	1.8077e-13
COX4I2	4.63491	2.07281e-14	1.93779e-13
DPYSL2	0.737062	2.11e-14	1.96355e-13
HMOX1	0.634382	2.34182e-14	2.16937e-13
RASIP1	2.1572	2.5823e-14	2.38132e-13
PLVAP	1.93846	3.53787e-14	3.24783e-13
HIGD1B	4.48005	3.9045e-14	3.56833e-13
FILIP1	2.86668	4.9223e-14	4.45851e-13
TNS1	1.45297	5.78579e-14	5.19447e-13
VWF	2.24458	7.22938e-14	6.46205e-13
DLC1	1.44979	9.07571e-14	8.07698e-13
ANKRD29	2.21757	1.94228e-13	1.72103e-12
COL6A2	0.806252	2.85222e-13	2.51504e-12
AGR2	1.1087	2.86305e-13	2.51504e-12
DKK3	1.43058	3.22856e-13	2.81188e-12
APOE	0.478768	3.94143e-13	3.41814e-12
LYVE1	1.72492	4.29847e-13	3.71198e-12
MCTP1	1.09634	4.54474e-13	3.9081e-12
NDUFC2	0.456476	4.61135e-13	3.94871e-12
PDK4	0.955486	4.84198e-13	4.12885e-12
MYC	0.388201	6.12447e-13	5.20069e-12
ARL2	0.668328	1.23604e-12	1.03664e-11
IGSF6	0.741867	2.37775e-12	1.95398e-11
CTNNB1	0.355376	2.42515e-12	1.98493e-11
TGM2	1.1101	2.49959e-12	2.03767e-11
PHLDB2	0.945	3.60971e-12	2.90774e-11
IER5	0.453291	4.20784e-12	3.37621e-11
RBP7	1.69454	4.68174e-12	3.74172e-11
CPVL	0.831864	4.96804e-12	3.95502e-11
AKR1C1	1.56878	5.23728e-12	4.15314e-11
ADGRL4	2.4406	5.61268e-12	4.43358e-11
CNRIP1	1.33923	5.85142e-12	4.60432e-11
BCAM	0.674725	7.82773e-12	6.13573e-11
HEY1	2.0425	9.53506e-12	7.44539e-11
FGA	3.28346	9.6699e-12	7.52186e-11
GNAI1	1.07907	1.25658e-11	9.70044e-11
RAMP2	1.72355	1.29448e-11	9.93188e-11
NEURL1B	2.42157	1.29631e-11	9.93188e-11
HNRNPH2	0.538599	1.59098e-11	1.20986e-10
FCGR1A	0.838651	2.02578e-11	1.53478e-10
FAM13C	2.92447	2.08325e-11	1.57247e-10
FHL2	0.629208	2.09352e-11	1.57439e-10
FRZB	1.35416	2.47098e-11	1.85142e-10
ENPP2	1.18836	2.71246e-11	2.02491e-10
EMCN	2.43927	2.84284e-11	2.1145e-10
ADAMTS9	2.01578	3.47557e-11	2.56638e-10
ITGA5	0.843216	4.10308e-11	3.00795e-10
ARL4D	0.835932	5.02049e-11	3.6542e-10
TMED7	0.767374	5.17156e-11	3.75076e-10
GPR4	3.19555	5.40146e-11	3.90361e-10
ANGPTL4	0.838066	5.42348e-11	3.90567e-10
PDGFRB	1.41723	7.01634e-11	5.0173e-10
CCDC102B	1.77054	7.50419e-11	5.34739e-10
THY1	1.03556	8.18417e-11	5.81161e-10
VMO1	1.1091	8.50695e-11	6.01985e-10
SERPINF1	0.630836	8.98665e-11	6.3373e-10
CXCL3	0.753048	9.04956e-11	6.35965e-10
RALB	0.43287	1.23438e-10	8.52766e-10
CYR61	0.511075	1.53255e-10	1.04868e-09
HSPA6	0.679549	2.02127e-10	1.37771e-09
ADAMTS4	1.58669	2.0562e-10	1.39684e-09
MRVI1	2.39457	2.17597e-10	1.4733e-09
TMEM176B	0.47271	2.24159e-10	1.5127e-09
PARM1	1.7511	2.56667e-10	1.72636e-09
TPPP3	2.20538	2.87957e-10	1.92412e-09
CD209	1.41648	3.24534e-10	2.16144e-09
LAMC1	0.837074	3.68737e-10	2.44784e-09
ZNF503	0.905009	5.76873e-10	3.8171e-09
CLDN5	2.47339	5.83343e-10	3.84742e-09
HSPG2	1.16892	5.88713e-10	3.87032e-09
MNDA	0.655633	6.13884e-10	4.02281e-09
PCOLCE	0.790751	6.84959e-10	4.45989e-09
IFI30	0.665929	7.18407e-10	4.66278e-09
IGLC2	0.497774	1.08026e-09	6.967e-09
FCGR2B	0.653235	1.11002e-09	7.13637e-09
MAP3K7CL	2.08339	1.14918e-09	7.36484e-09
PMF1	0.69352	1.19176e-09	7.61384e-09
CALCRL	1.86008	1.2119e-09	7.71829e-09
SFN	0.530094	1.27952e-09	8.12356e-09
IL1RN	0.920666	1.34045e-09	8.4634e-09
AXL	0.977033	1.35576e-09	8.52793e-09
COL1A2	0.548664	1.3816e-09	8.66369e-09
PLOD2	0.813599	1.43918e-09	8.9971e-09
RAMP3	2.11947	1.82683e-09	1.13164e-08
PTGS2	1.3154	1.84339e-09	1.13843e-08
TREM1	1.41207	1.94503e-09	1.19758e-08
LAMA4	0.967601	2.0004e-09	1.22796e-08
FPR1	1.04191	2.16062e-09	1.31052e-08
LY6D	0.949947	2.32354e-09	1.40516e-08
F3	1.10918	2.51189e-09	1.51457e-08
FBLIM1	0.577637	3.09625e-09	1.8614e-08
TMBIM4	0.445748	3.28318e-09	1.96798e-08
RAI14	0.723541	3.50695e-09	2.08981e-08
CDA	1.73228	3.72479e-09	2.21315e-08
SYNPO2	2.00064	4.21823e-09	2.49906e-08
SNAI1	1.08046	4.41946e-09	2.61068e-08
KCNJ8	3.01132	4.47785e-09	2.63753e-08
EBF1	1.2694	4.68723e-09	2.7529e-08
APOLD1	1.42573	5.18736e-09	3.03788e-08
MAOA	2.46577	5.27138e-09	3.07824e-08
PHACTR1	0.655062	5.66627e-09	3.28064e-08
LAMB2	1.00001	6.85735e-09	3.95901e-08
ITGA1	0.80381	7.15907e-09	4.12152e-08
FPR3	0.778222	8.02755e-09	4.59555e-08
NPL	0.704961	8.20103e-09	4.68171e-08
TM4SF1	0.286785	8.67775e-09	4.94002e-08
RIN2	0.72258	9.2657e-09	5.2562e-08
CPNE8	1.15994	9.28474e-09	5.2562e-08
CFH	0.994423	1.02825e-08	5.78888e-08
DNAJB4	0.271567	1.04501e-08	5.86703e-08
CP	1.79814	1.08462e-08	6.0727e-08
NREP	0.672634	1.55605e-08	8.68828e-08
ABL2	0.51938	1.6792e-08	9.32482e-08
MYH11	3.3016	1.84784e-08	1.02334e-07
SPRR1B	3.79223	1.93035e-08	1.06614e-07
TBX2	3.07775	1.98838e-08	1.09522e-07
THBS1	0.692865	2.01006e-08	1.10418e-07
SNHG25	1.35518	2.03203e-08	1.11325e-07
C1QTNF1	1.77462	2.05042e-08	1.12031e-07
NDUFA13	0.281191	2.26386e-08	1.23362e-07
FGD4	0.723285	2.4563e-08	1.33492e-07
AQP1	1.4188	2.53892e-08	1.37615e-07
RHCG	1.45366	2.54856e-08	1.37771e-07
ERRFI1	0.421975	2.68989e-08	1.45027e-07
CFL2	0.731572	2.80979e-08	1.51091e-07
TNS2	1.40391	3.06797e-08	1.6454e-07
CLEC14A	1.85056	3.48341e-08	1.85146e-07
RIT1	0.382926	3.60916e-08	1.91051e-07
PALMD	1.06513	3.84896e-08	2.02692e-07
TWSG1	0.750381	4.28106e-08	2.24866e-07
ADCY4	2.14494	4.50829e-08	2.36192e-07
MMP19	0.787609	6.40646e-08	3.33923e-07
AOC3	3.5196	6.80285e-08	3.53679e-07
SMOC2	1.76563	7.0339e-08	3.6476e-07
EDNRA	2.0413	7.42847e-08	3.83271e-07
RASD1	0.668334	8.19672e-08	4.19722e-07
AKR1C3	0.737966	8.25114e-08	4.21449e-07
METRNL	0.569798	8.69623e-08	4.40869e-07
MT1M	1.71956	9.45974e-08	4.78386e-07
ATP6V1B2	0.270395	1.03435e-07	5.21785e-07
GJC1	2.58058	1.09044e-07	5.4872e-07
UBE2E2	0.438683	1.1021e-07	5.5322e-07
ALKBH5	0.370522	1.13526e-07	5.68469e-07
SLC40A1	0.508213	1.27781e-07	6.38278e-07
CDH5	2.41398	1.42348e-07	7.09304e-07
SRP19	0.484781	1.69001e-07	8.4006e-07
SMTN	0.780524	2.00653e-07	9.94966e-07
PTPRM	1.45059	2.06112e-07	1.01955e-06
UBE2W	0.54005	2.25708e-07	1.11109e-06
FHL1	1.02914	2.27015e-07	1.11483e-06
TNFRSF10D	1.17609	2.38671e-07	1.16926e-06
FAM162B	4.01473	2.43018e-07	1.1877e-06
RAMP1	1.00076	2.4561e-07	1.1975e-06
INSR	0.94998	2.51354e-07	1.22258e-06
LOXL2	0.954689	2.69912e-07	1.30972e-06
CD34	1.59371	3.01902e-07	1.458e-06
CFI	1.63539	3.14671e-07	1.51608e-06
NOTCH4	1.75029	3.54512e-07	1.704e-06
TESC	0.372579	3.80243e-07	1.82076e-06
CD40	0.267151	3.8059e-07	1.82076e-06
LGI4	3.69407	3.83171e-07	1.82881e-06
TMEM45A	0.476815	4.858e-07	2.31322e-06
C1orf56	0.596371	5.50262e-07	2.60799e-06
CXorf36	2.37589	6.20401e-07	2.92004e-06
FERMT2	0.574527	6.38866e-07	3.00002e-06
KCNMB1	1.48711	6.62627e-07	3.10445e-06
FXYD3	0.510689	6.90821e-07	3.22911e-06
SNAPC1	0.303524	7.83632e-07	3.65456e-06
PHLDA3	0.621252	9.82696e-07	4.57245e-06
SLCO3A1	1.02774	1.05768e-06	4.91012e-06
LAMA5	0.792528	1.09941e-06	5.08073e-06
HIGD1A	0.478676	1.1064e-06	5.10145e-06
MMRN2	2.27679	1.12145e-06	5.14755e-06
SYNPO	1.66717	1.29477e-06	5.89005e-06
PDGFA	0.9489	1.306e-06	5.92788e-06
KRT16	0.774724	1.5251e-06	6.8917e-06
EGFLAM	1.43788	1.56655e-06	7.06335e-06
GLA	0.214093	1.72732e-06	7.75393e-06
RDH10	0.991487	1.77234e-06	7.93854e-06
HEG1	0.764454	1.80289e-06	8.05765e-06
NRN1	1.24167	1.85978e-06	8.29371e-06
CYYR1	1.30968	2.00882e-06	8.9388e-06
NDUFA7	0.595627	2.11573e-06	9.39403e-06
HRH2	0.941784	2.13771e-06	9.47101e-06
LMOD1	2.59829	2.20566e-06	9.75085e-06
ABCC9	3.13922	2.56943e-06	1.13344e-05
AKAP12	1.13453	2.62419e-06	1.15509e-05
TMIGD3	1.25647	3.19971e-06	1.40237e-05
SCARB1	0.508556	3.4954e-06	1.52867e-05
TREM2	0.733214	3.51467e-06	1.53381e-05
NMD3	0.277076	3.68027e-06	1.60175e-05
DCTN6	0.250678	3.68607e-06	1.60175e-05
DNAJA4	0.419776	3.84334e-06	1.663e-05
COMMD3	0.448557	3.89301e-06	1.68092e-05
C5orf38	0.998771	4.21558e-06	1.81636e-05
FN1	0.33894	4.2562e-06	1.82999e-05
ENPEP	2.38212	4.45938e-06	1.91331e-05
CRIM1	0.669703	4.73343e-06	2.02273e-05
FOXS1	2.50163	4.84461e-06	2.06555e-05
SMARCA1	0.899831	4.87869e-06	2.07573e-05
APLNR	2.72123	5.27583e-06	2.23537e-05
OLFML2A	1.47757	5.73517e-06	2.42495e-05
CCL8	1.01295	5.89873e-06	2.48895e-05
SLC9A3R2	0.77148	5.93951e-06	2.50097e-05
LTBP1	0.760445	6.04276e-06	2.53921e-05
SORBS2	0.94356	6.14344e-06	2.5762e-05
VWA1	0.787988	6.25134e-06	2.61606e-05
NFIL3	0.65659	6.60827e-06	2.75977e-05
MTRNR2L8	0.52768	6.99429e-06	2.915e-05
ECM1	0.80057	7.10449e-06	2.95489e-05
BMP1	1.06111	8.13685e-06	3.37051e-05
LDB2	1.08589	8.38889e-06	3.46084e-05
COL1A1	0.214842	8.78927e-06	3.61869e-05
COL6A1	0.548182	8.82867e-06	3.62759e-05
SLAMF9	2.33306	9.66185e-06	3.94606e-05
STC1	1.33829	9.91506e-06	4.04138e-05
IGFBP2	0.861155	1.09038e-05	4.42901e-05
IL10	0.993958	1.09295e-05	4.42901e-05
A4GALT	0.924091	1.09313e-05	4.42901e-05
ACVRL1	1.194	1.18276e-05	4.75442e-05
KANK2	0.929955	1.18821e-05	4.76688e-05
ITPRIPL2	0.651308	1.33129e-05	5.33037e-05
IL3RA	1.38174	1.35723e-05	5.42361e-05
BCAR1	0.66305	1.36284e-05	5.43536e-05
LXN	0.456777	1.39421e-05	5.5496e-05
IRAK3	1.04445	1.40407e-05	5.57798e-05
RASL12	2.49994	1.45464e-05	5.76763e-05
SERPINE1	0.753661	1.48807e-05	5.88873e-05
MTUS1	0.584685	1.51948e-05	6.00136e-05
TMEM38B	0.483912	1.53379e-05	6.04614e-05
AGRN	0.504182	1.55342e-05	6.1117e-05
ARL6IP1	0.176781	1.59999e-05	6.28281e-05
PTPRB	2.05996	1.69518e-05	6.6438e-05
CHURC1	0.0922279	1.69999e-05	6.64985e-05
TSPAN7	2.06262	1.71086e-05	6.67956e-05
CARMN	2.97816	1.86574e-05	7.25647e-05
OTUD1	0.716488	1.97071e-05	7.65012e-05
SLIT3	1.67154	2.0673e-05	7.9946e-05
EDNRB	1.14045	2.14645e-05	8.25369e-05
FZD4	1.23031	2.17414e-05	8.33366e-05
SPP1	0.580871	2.17542e-05	8.33366e-05
SYDE1	1.28919	2.19299e-05	8.38521e-05
CRISPLD2	0.88303	2.32968e-05	8.856e-05
NACA2	0.729192	2.48931e-05	9.42976e-05
NES	1.09093	2.55444e-05	9.65853e-05
TMEM88	1.77249	2.85277e-05	0.000107071
PRRX1	0.765978	3.2058e-05	0.00011966
PDE1A	3.04546	3.47122e-05	0.00012933
SOX18	2.37786	3.48332e-05	0.000129544
COL3A1	0.293963	3.67815e-05	0.00013654
GJB2	0.881284	3.81125e-05	0.000140968
PALLD	0.315324	3.92055e-05	0.000144748
SERPINI1	1.32914	3.97812e-05	0.000146608
LINC01116	0.993594	4.10039e-05	0.000150569
ITGAM	0.7766	4.72299e-05	0.000172809
C1R	0.456394	4.86525e-05	0.000177695
GPRC5C	0.605649	5.20976e-05	0.00018926
DERL3	0.372643	5.36112e-05	0.000194412
LIFR	1.61251	5.75678e-05	0.00020802
ZNF703	0.747708	6.30893e-05	0.000227568
TMEM255B	1.10228	6.41968e-05	0.000231154
BCL2A1	0.25322	6.62041e-05	0.000237961
GGT5	0.867658	6.82602e-05	0.000244919
OLR1	0.719202	6.88956e-05	0.000246765
ZNF385D	1.42179	7.00951e-05	0.000250621
APOC1	0.275851	7.10713e-05	0.000253666
TIE1	2.14246	7.9393e-05	0.000282872
RBMS3	0.925197	8.36421e-05	0.000296973
COL15A1	0.917767	9.60383e-05	0.000340393
SYNJ2BP	0.574046	9.81132e-05	0.000347144
FCGBP	1.53676	0.000102974	0.000362453
NSRP1	0.142593	0.000104281	0.000365793
OSM	0.66765	0.000105697	0.000370121
MRPL53	0.594686	0.000112921	0.00039427
CLIC2	0.794656	0.000113735	0.000396226
CASP14	1.09064	0.000121036	0.000419508
ST5	0.695631	0.000121325	0.000419796
SCARF1	1.40475	0.000135883	0.000469373
RCAN2	1.65203	0.000147517	0.000508697
ACKR1	1.8677	0.000151524	0.000521632
ROBO4	2.45166	0.000169389	0.000582149
MTMR11	1.08126	0.00017174	0.000588244
SSTR2	1.66528	0.000173289	0.000592556
MYCT1	2.45115	0.000177366	0.000605482
PPARG	0.838935	0.000195872	0.000665312
CSPG4	1.93942	0.000200097	0.000677405
ELK3	0.261348	0.000201313	0.000680391
UBXN8	0.586154	0.00021234	0.000715908
KLF7	0.537048	0.000212524	0.000715908
SMIM10	1.25418	0.000215973	0.000726324
FNDC4	1.09638	0.000223456	0.000750254
NID1	0.8144	0.000227789	0.000762289
FSTL3	0.824619	0.000241755	0.0008077
NMB	0.168136	0.000250386	0.000832441
FER	0.753428	0.000258885	0.000859297
IER5L	0.646151	0.000267237	0.000884139
ANKRD65	1.37674	0.000270982	0.000895074
MMD	0.276879	0.000284124	0.000935452
MFGE8	0.307528	0.000284684	0.000935784
SEPT8	0.557172	0.000289988	0.000951682
NLRP3	0.641459	0.000311232	0.00101976
FLT1	1.23603	0.000322227	0.00105409
LIMS2	0.876042	0.00032892	0.00107426
ERG	2.2032	0.000339972	0.00110681
KDR	2.25464	0.000366418	0.00118911
FEZ1	1.18528	0.000373051	0.00120871
HHEX	0.640775	0.000398444	0.00128893
OSMR	0.532256	0.000422881	0.00136582
EEF1E1	0.413418	0.000424357	0.00136842
IL6	1.17008	0.000449249	0.0014464
PCDH17	2.36085	0.000469247	0.00150602
FCGR3B	1.15668	0.000521152	0.00166475
MECOM	1.5173	0.000536185	0.00170742
LRRC32	1.20479	0.000564069	0.00178939
PXDN	0.548765	0.000576249	0.00182077
HSPB8	1.17983	0.000577405	0.0018216
S100A3	1.7194	0.000607565	0.00191083
HEYL	2.55344	0.000626942	0.00196873
CXCL6	1.51347	0.000647747	0.00202782
CPQ	0.338396	0.00065	0.00202864
MT1A	1.86862	0.00065902	0.00205364
DIO2	1.24715	0.000665558	0.00207085
EREG	0.949842	0.000705238	0.00219097
NRARP	1.81532	0.000736509	0.00228464
PPP1R12B	0.545816	0.000741292	0.00229598
SOX17	2.28007	0.000791214	0.00244367
MRPL23	0.319308	0.000791376	0.00244367
CAMK2N1	0.664019	0.000851644	0.00262183
MAGI1	0.829963	0.000855477	0.00262966
FCN1	0.845894	0.000875045	0.00268576
SPRY4	1.45896	0.000903472	0.00276468
PKN3	1.20848	0.000914421	0.00279399
LYNX1	0.904808	0.000978931	0.00298215
TBX2-AS1	2.57006	0.00100736	0.00306417
SNAI2	0.773211	0.00108155	0.00327031
CRYAB	0.18012	0.00109557	0.00330782
FBP1	0.267813	0.00112143	0.00337587
HNRNPH1	0.0743778	0.00113591	0.00341444
GATA2	1.90765	0.00114618	0.00344023
PREX2	2.12316	0.00115045	0.00344798
SOCS2	0.552673	0.00115631	0.00346044
NEXN	0.781884	0.00117457	0.00350994
FXYD6	0.711922	0.0011776	0.00351383
ACTG2	1.02111	0.00124765	0.00371743
SEMA6B	1.50973	0.00125721	0.00374043
OAF	0.675648	0.00128657	0.00382219
TMTC3	0.497371	0.00130956	0.00388485
METRN	0.794715	0.00134858	0.00398897
CCRL2	0.47943	0.00139772	0.00412833
CNN1	1.86912	0.00141641	0.0041775
PDLIM3	0.510498	0.00144148	0.00424527
EGFL6	1.46731	0.00152711	0.00448451
PPFIBP1	0.243616	0.00153251	0.00448743
PLEKHH3	0.727055	0.00163009	0.00476633
CSGALNACT1	0.215794	0.00164437	0.00480119
HTRA1	0.458412	0.00168111	0.00490144
ADAMTS2	0.774867	0.00173652	0.0050507
RAPGEF3	2.09305	0.00173726	0.0050507
SIK1	0.728488	0.00176617	0.00510784
GDPD3	1.6144	0.00176694	0.00510784
CTGF	0.302894	0.00178799	0.00516135
HSPA2	0.529704	0.00180137	0.00519265
FSTL1	0.414448	0.00182935	0.00526585
DENND5A	0.686536	0.00183573	0.00527676
HOXD8	1.85169	0.00186294	0.00534742
GRK5	0.420723	0.00188966	0.00541649
MAP7D3	0.22487	0.00192033	0.00549668
PFKM	0.546503	0.00197708	0.00564962
CLEC10A	0.656506	0.00197931	0.00564962
PCAT19	2.18714	0.00201695	0.00574903
IGLC3	0.399376	0.00204561	0.00582256
RASL11A	0.524849	0.00205337	0.00583651
PCDH1	1.19894	0.002119	0.0060106
LPCAT1	0.286826	0.00212052	0.0060106
PTPRG	1.04752	0.0021587	0.00611033
ARHGEF17	1.07809	0.00221325	0.00625603
COL5A3	1.35382	0.00227096	0.00640141
MEST	0.146386	0.00229116	0.00644942
CDKN1C	0.623097	0.00232442	0.00653403
CHN1	0.474648	0.00237338	0.00666245
ANGPT1	2.1051	0.00238333	0.0066812
CA2	0.337786	0.00238982	0.00669017
TNFSF12	0.508365	0.00259124	0.00722429
VASH1	0.853445	0.00278771	0.00774732
TNFRSF17	0.415224	0.0028057	0.00777961
C1QTNF6	0.801648	0.00285081	0.00788326
STARD8	1.45388	0.00287608	0.00792089
NID2	1.36607	0.00299077	0.00821455
CCDC3	2.11802	0.00303101	0.00830866
CD300E	1.22182	0.00303319	0.00830866
EVA1B	0.545391	0.00304053	0.00831759
DKK1	0.624152	0.00306109	0.00835733
NOSTRIN	0.797078	0.00306326	0.00835733
SEC23A	0.041575	0.00308576	0.00840747
TMTC1	1.67971	0.00324712	0.0088353
FGB	2.02647	0.00325532	0.0088458
LLPH	0.136063	0.00328118	0.00890419
RASA4	0.776938	0.00332542	0.00901225
NDUFA9	0.14881	0.00348292	0.00942654
RABGAP1	0.238262	0.00360144	0.0097344
DOCK6	1.13473	0.0036309	0.00980102
KCNE4	1.68062	0.00384126	0.0103415
RAPGEF5	0.95613	0.00386515	0.0103921
MOCS1	1.86402	0.00390782	0.0104929
CDKN2A	0.0218144	0.00399299	0.0107075
HSPB6	1.43871	0.00406218	0.0108787
CAP2	1.18724	0.00413229	0.011052
TMEM47	0.950832	0.00416577	0.0111269
RRAD	1.56302	0.00427974	0.0114015
JAM2	0.980139	0.0042947	0.0114264
MIR210HG	0.75035	0.00438061	0.0116397
GRASP	0.664271	0.0044056	0.0116909
LAMB1	0.471368	0.00445346	0.0118025
AMOTL1	0.648925	0.00447602	0.0118469
DLL4	1.97124	0.00450722	0.011914
EFNB2	0.605226	0.00452246	0.0119388
TRIP10	0.217145	0.00460126	0.012116
ADCY3	0.475944	0.00460147	0.012116
EFEMP2	0.456503	0.00462323	0.0121576
HOXD9	2.13542	0.00465225	0.0122024
NRGN	1.24772	0.00478971	0.0125468
PRKG1	1.48603	0.0048623	0.0127206
IFIT2	0.141217	0.00488289	0.0127581
NUAK1	1.56093	0.00497941	0.012977
REM1	2.22003	0.00522781	0.0135896
THSD7A	1.98332	0.00524269	0.013611
IL33	0.995549	0.00529517	0.0137093
STXBP2	0.102352	0.00529784	0.0137093
ADGRL2	1.24379	0.00532256	0.0137483
CXCL17	0.435704	0.00541071	0.0139583
MT1E	0.0992845	0.0055608	0.0143273
IPO11	0.539135	0.00559802	0.014405
RHOJ	1.09574	0.0059069	0.0151425
RBPMS2	1.69465	0.00597361	0.015275
PDE5A	1.2934	0.00617853	0.0157595
UBE2M	0.251722	0.0064246	0.0163055
TNS4	0.877943	0.00651475	0.0165138
SHE	1.99802	0.00653215	0.0165373
TMEM204	0.279607	0.00656977	0.0166119
MSX1	1.47438	0.00674336	0.0170086
COL14A1	0.85953	0.00683239	0.0172119
SEMA4C	0.717414	0.00693665	0.0174529
ZNF532	0.57687	0.00695418	0.0174727
CCL13	1.16351	0.00696164	0.0174727
CHMP4A	0.0279817	0.00725368	0.0181833
PLXDC1	0.633419	0.00737586	0.0184668
GPR146	0.946052	0.00744577	0.0185886
ADGRA2	0.987813	0.00745186	0.0185886
CETN3	0.171424	0.00748508	0.0186486
HGF	0.876316	0.00762244	0.0189677
DAAM2	1.64275	0.00770622	0.0191294
NOTCH1	0.287714	0.00792872	0.0196101
RCAN1	0.234518	0.00819682	0.020204
ANKRD22	0.401674	0.00819857	0.020204
ARHGEF10L	0.673095	0.00822274	0.0202146
CYGB	1.85396	0.00822274	0.0202146
ARHGAP6	1.27345	0.00827271	0.0202965
LILRA5	1.01818	0.00827595	0.0202965
IFT27	-0.0813077	0.00857511	0.0210049
DNAAF1	0.76408	0.00859356	0.0210248
EFNB1	0.589894	0.00878341	0.0214635
SCIN	1.94968	0.00900049	0.0219414
MAN1A1	0.267199	0.0092029	0.0223813
C1S	0.13463	0.009845	0.0238858
TCTEX1D2	0.399608	0.0103586	0.0250155
FRY	1.01725	0.0103597	0.0250155
MEOX2	1.78759	0.0104196	0.0251304
FKBP9	0.264129	0.0106967	0.0257611
ACE	1.00111	0.0108247	0.0260149
AQP3	0.0819344	0.010977	0.0263499
MRGPRF	1.38895	0.0110159	0.0264122
S1PR3	1.07427	0.0112851	0.0269626
CXCL5	1.68562	0.012251	0.0290996
SLC12A4	0.657709	0.0123633	0.0293322
SLCO2A1	1.33081	0.0130273	0.0308358
INAFM1	0.285542	0.0131697	0.0311367
MDK	0.0521559	0.0132191	0.0312173
CLEC3B	1.90064	0.0134647	0.0317238
CCZ1	0.187772	0.0134812	0.031726
HDAC5	0.255961	0.0136844	0.032167
NR2F2-AS1	1.61623	0.0138873	0.0326063
COMMD10	-0.00653405	0.0141542	0.0331948
PRCP	0.0837477	0.0143822	0.0336521
CD109	0.201109	0.014601	0.0340857
PTN	0.485031	0.0146337	0.034123
PRR16	1.39251	0.0146981	0.034234
KANK3	1.34627	0.0148348	0.034513
PYCR2	0.090366	0.015158	0.0351845
ITGB5	0.339672	0.0152781	0.035423
ECEL1	1.83845	0.0153031	0.0354406
PLPP1	0.157569	0.0153746	0.0355657
TAP2	0.104538	0.0155676	0.0359714
AQP9	0.890067	0.0157341	0.036315
PAM	-0.0316559	0.0160635	0.0369914
PDLIM4	0.50093	0.0161919	0.037203
NDUFAF1	0.0263811	0.0164675	0.0377087
PLAGL1	0.0919429	0.0168238	0.0384813
BORCS8	0.30546	0.017137	0.0391101
RBP5	0.774368	0.0174502	0.0397357
CASKIN2	0.871757	0.0175161	0.0398412
BTNL9	1.8714	0.0176262	0.0400469
P4HA2	0.234271	0.0178915	0.0406046
PDE2A	2.02174	0.0180725	0.0409417
IGSF21	1.21492	0.0180803	0.0409417
CCL20	0.510398	0.0181599	0.0410764
PI3	0.500925	0.0184659	0.0417224
CCR10	1.01918	0.0185218	0.041753
RND3	0.217201	0.0185356	0.041753
HOXC9	0.533634	0.0190598	0.0427796
PHLDB1	0.38919	0.0191915	0.0429333
LBP	0.779209	0.0196564	0.0439252
LYPD1	1.51329	0.0200579	0.0447243
NPNT	0.844706	0.0203389	0.0453013
PALD1	1.15726	0.0203883	0.0453543
NXN	0.780428	0.0205206	0.0455566
CBWD1	0.106428	0.0205957	0.0456736
CNFN	0.176386	0.0207837	0.0460405
MAP1A	0.545827	0.0211409	0.0466794
IGF1R	0.4566	0.0216366	0.0476708
SHROOM4	1.83953	0.0217266	0.0478173
DLX5	1.38957	0.0221602	0.048719
IGLL5	0.185707	0.0225172	0.0493974
ITGAX	0.434841	0.0226956	0.0496816
HEY2	1.10266	0.0237089	0.0517331
DTWD1	0.056977	0.0239522	0.0522082
MPRIP	-0.0252491	0.0241529	0.0525894
DNASE1L3	1.353	0.0242672	0.0527819
HOXA10	0.721894	0.0244739	0.053118
ID4	0.963469	0.0251671	0.0545644
NTN4	0.951893	0.0255123	0.055254
CES1	1.10585	0.0255597	0.055298
ABHD14A	0.25758	0.0256816	0.0555027
FGD5	1.31816	0.0262055	0.0565751
FPGT	0.559796	0.0264599	0.0570639
STX2	0.472861	0.0272896	0.0587288
IGFBP5	0.279807	0.0273523	0.0588016
PGRMC2	0.0983684	0.0278009	0.059703
MCEMP1	1.51776	0.0278614	0.05977
NUAK2	0.491482	0.0291504	0.0624694
NISCH	0.141183	0.0297185	0.0636201
AFAP1L1	1.33408	0.0305189	0.0649922
DMPK	0.514324	0.030895	0.0655875
SNHG9	-0.00978248	0.0310353	0.0658167
PROS1	0.516734	0.0312551	0.066214
CD248	0.677785	0.0316704	0.0670241
ARHGAP23	1.13881	0.0317756	0.0671497
CLEC5A	0.81542	0.0318306	0.067154
TSPAN12	0.963498	0.0319655	0.0673689
SH2D3C	0.175442	0.0323461	0.0681007
HECW2	1.1853	0.0332232	0.0698749
ECM2	1.30638	0.0336784	0.0707594
GPRC5B	0.638468	0.0343551	0.0718846
SDHAF2	0.100651	0.0348663	0.0728795
COL5A2	0.303267	0.0355344	0.0741998
PTGIR	1.0787	0.0356899	0.0744484
ANKH	0.0125368	0.0368555	0.0764882
TMEM98	0.157037	0.0369786	0.0766656
GRB10	0.325461	0.0387297	0.0799707
GPR176	1.43918	0.0395374	0.0814734
JSRP1	0.325004	0.0395992	0.0815183
AC017002.2	0.191281	0.0399307	0.0821178
MT1X	0.0309512	0.0401936	0.0825752
P2RY14	0.856418	0.0409728	0.0840912
RNF152	0.960977	0.0410911	0.0842491
LRRC75A	0.613972	0.0417511	0.0855163
GIMAP1	0.17516	0.0427508	0.087476
SUCNR1	0.959506	0.0445681	0.0908298
AEBP1	0.284392	0.0446373	0.09088
ARAP3	1.21876	0.044715	0.0909472
ANPEP	0.453748	0.0450102	0.0914564
TMEM242	-0.0339717	0.0452277	0.0917217
PEAR1	1.63616	0.0452308	0.0917217
ICAM4	0.651525	0.0456727	0.0925257
ITIH5	1.32765	0.0458033	0.0926063
SYNC	0.451157	0.0464543	0.0938294
SDS	0.510562	0.0467794	0.094299
NOMO1	0.300864	0.0468318	0.0943114
STK38L	0.0700485	0.0476799	0.0956414
SLC35D2	0.399554	0.0479009	0.0959902
CACNA2D1	1.10381	0.0479721	0.0960339
SGIP1	1.51733	0.0482461	0.0963975
MEIS2	0.318879	0.0486648	0.0970808
ZNF358	0.682127	0.0486833	0.0970808
NT5E	0.487665	0.0492404	0.0980958
IFIT3	-0.0169121	0.0496951	0.0988085
FAM43A	0.473983	0.050057	0.0994309
IGLV1-36	0.899199	0.050138	0.0994949
RAB23	0.575427	0.0505547	0.100127
MAFF	0.0164921	0.0509975	0.100613
EGLN2	0.0804066	0.0511844	0.100884
BATF3	0.7794	0.05173	0.101762
SPRYD7	0.0600895	0.0517988	0.101799
LRG1	0.233274	0.0528616	0.103675
IGHV3-48	0.494127	0.0529327	0.103675
NEDD4	0.394947	0.0529568	0.103675
KALRN	0.966182	0.0532427	0.104135
CPNE5	-0.0914867	0.0534139	0.10437
PLCE1	0.695439	0.0538246	0.105071
LRRC8C	0.177985	0.0538803	0.105079
MTHFS	-0.0676471	0.0569644	0.110882
FKBP10	0.332074	0.0571719	0.11118
EMP1	0.178519	0.0576367	0.111977
LAMA3	0.721052	0.0587429	0.113863
TCEAL1	0.158683	0.0587754	0.113863
ING1	0.0903035	0.0589215	0.114038
HSPA12B	1.48691	0.0597051	0.115183
FAM234A	0.22925	0.0600146	0.115496
EDIL3	1.79431	0.0602155	0.115773
JAM3	0.781548	0.0604791	0.11617
GDF15	0.525387	0.060783	0.116533
WISP2	0.674759	0.0608395	0.116533
R3HDM2	0.0194861	0.0616144	0.117906
BAALC	1.406	0.0621731	0.118752
ENTPD3-AS1	0.149395	0.0631137	0.120224
PPP2R5B	0.180998	0.0644674	0.122675
CCDC151	1.44505	0.0657505	0.124999
PPP1R12C	0.268656	0.0668789	0.127026
RERG	0.352247	0.067426	0.127946
RBFOX2	0.214912	0.0679515	0.128715
HCFC2	0.279804	0.0691694	0.130646
MMP28	1.08081	0.0709924	0.133841
P2RX1	0.228617	0.0715399	0.134624
RBKS	-0.0380548	0.0732929	0.137542
IGLV2-8	0.147263	0.0738584	0.138476
CBX6	0.20415	0.0752453	0.140817
MED7	-0.121374	0.0765903	0.143072
L3HYPDH	0.0953212	0.0767754	0.143238
CLEC4E	0.580853	0.0768198	0.143238
GABRD	1.26309	0.0784728	0.145786
IGLV3-27	-0.172371	0.0786699	0.145983
CHL1	0.985213	0.0788654	0.145983
SDC2	0.343536	0.0791703	0.146415
THSD1	1.67473	0.080271	0.148181
TFPI2	0.632052	0.0823066	0.151802
FAM107A	1.46195	0.0826378	0.152275
CHAC1	0.447626	0.0827442	0.152333
EMILIN1	0.449002	0.0834096	0.153288
MIR3945HG	1.13117	0.0841993	0.154593
COPZ2	0.747487	0.0852096	0.156026
CDH13	0.6639	0.0862804	0.157562
HLA-DQB2	0.70575	0.0864731	0.157773
FPR2	1.12322	0.0871267	0.158823
FAM228B	0.16805	0.0878152	0.159792
APOBEC3A	0.429694	0.0881301	0.160222
GJA1	0.582783	0.0882195	0.160242
ZNF667-AS1	0.218835	0.0906242	0.164107
GPC1	0.328916	0.0911511	0.164832
CXCL12	0.118296	0.0915263	0.165364
ARL15	0.306481	0.0917408	0.165605
DDR2	0.437965	0.0921128	0.165982
SEMA3F	1.19288	0.0923854	0.166326
HK2	0.176457	0.0924827	0.166355
HEATR5A	0.263333	0.0925806	0.166384
PIGK	0.0524027	0.0928379	0.166699
WDR11	0.024582	0.093499	0.167591
SRGAP2C	0.229155	0.0949318	0.169711
CTSO	0.123555	0.0960544	0.171512
VPS33A	0.143254	0.0961073	0.171512
CBFA2T3	0.770561	0.0971599	0.173239
FAM167B	0.712948	0.0974908	0.173677
SLC15A4	0.200337	0.0980483	0.174517
IGLV3-10	-0.119088	0.0998577	0.177583
NOS3	0.846823	0.100955	0.179124
ZCCHC10	-0.180496	0.100988	0.179124
ARRDC3	-0.0241248	0.104486	0.184685
RAB4B	0.171616	0.106224	0.187432
PLCG2	0.0185377	0.106766	0.188227
CCNB1	0.146023	0.107589	0.189349
NFASC	1.00214	0.108227	0.18998
DLL1	1.07387	0.108928	0.191045
PDGFB	0.637605	0.110026	0.192639
FXYD1	0.340862	0.110325	0.192998
LUCAT1	0.531654	0.110496	0.193131
EXOC3L1	0.762888	0.110851	0.193585
CCL23	0.96526	0.111235	0.194023
PTHLH	0.329328	0.112576	0.195926
C2orf76	-0.000911127	0.112974	0.196284
ADM5	1.4838	0.113738	0.197444
IGHV3-73	0.30143	0.115812	0.200644
SNX33	0.472153	0.115834	0.200644
ANGPTL2	0.527718	0.116002	0.20069
PHKG1	0.359361	0.116433	0.201094
PLEKHG5	0.750692	0.117842	0.203355
BEST1	0.172191	0.120967	0.208042
FLNC	1.15072	0.121174	0.208223
CNTNAP3B	1.26889	0.121474	0.208467
IGHA1	0.14535	0.121521	0.208467
C3orf70	1.1004	0.121801	0.208772
ZEB1	0.0715775	0.124226	0.212572
MED6	-0.0492009	0.125345	0.214127
WTIP	1.45303	0.12587	0.214664
S1PR1	0.0478818	0.126734	0.215957
EDN1	0.152432	0.128189	0.218253
IGLV2-18	-0.204017	0.12898	0.219234
GPAT2	1.07736	0.130494	0.221254
STXBP5	0.183822	0.130629	0.221298
LINC00877	1.02188	0.131114	0.221936
SLC2A5	0.250931	0.132987	0.224361
ZBTB16	0.387318	0.133144	0.22444
C12orf29	-0.0550082	0.135478	0.227809
DOK4	0.675679	0.137495	0.230819
HAUS7	0.707549	0.13768	0.230941
LAMB3	0.14494	0.138966	0.232905
HCAR3	0.896645	0.139284	0.233246
SIGLEC14	0.99455	0.141971	0.237552
CYTH3	0.326163	0.142261	0.237706
CDC42EP5	1.00328	0.144636	0.24043
GLIS3	0.727827	0.144835	0.240554
EPB41L4A	0.519546	0.145163	0.240554
SMAD9	1.388	0.147467	0.243943
DYRK3	0.355298	0.149157	0.246538
SENP3	0.330881	0.149413	0.246762
LURAP1L	0.219317	0.149709	0.24705
RASSF3	0.171791	0.150968	0.248724
AFAP1L2	0.241309	0.155425	0.255117
NPEPL1	0.17315	0.155474	0.255117
PDE1B	0.938123	0.156428	0.256476
RAB6B	0.674532	0.159782	0.261345
CPD	-0.0869395	0.16096	0.26306
LSMEM1	0.590694	0.161285	0.263221
DISC1	0.350956	0.162139	0.263929
XG	0.899827	0.163529	0.265922
CNGA1	1.18532	0.165021	0.267765
ST20	0.10881	0.165361	0.268104
ARHGEF25	0.880455	0.165774	0.268559
FADS3	0.164358	0.170291	0.275003
ZNF268	0.094226	0.17119	0.276017
NTRK2	0.565255	0.173941	0.279128
RARB	1.18898	0.174897	0.280054
OLFM1	0.541164	0.17493	0.280054
QPCT	0.0731934	0.176918	0.282661
TLE4	-0.12572	0.177779	0.283722
SEMA5A	0.485853	0.178516	0.284368
TM4SF18	0.557405	0.178602	0.284368
MAMDC2	1.17191	0.18207	0.289438
OSR2	0.386471	0.184127	0.292479
RNF122	0.349176	0.185078	0.293547
C2CD4B	0.963181	0.188287	0.298157
TTC28	0.436623	0.191958	0.302234
TNFRSF10C	0.719022	0.19207	0.302234
GEM	0.0287787	0.192196	0.302234
HCAR2	0.542439	0.194218	0.304709
PARD6G	0.647009	0.19569	0.306582
CCL18	0.346839	0.195713	0.306582
HPGDS	1.15422	0.19625	0.307188
ADCY6	0.779978	0.196563	0.307441
KLF9	0.00548633	0.196855	0.307662
ARC	0.536553	0.1975	0.308433
SHOX2	0.672419	0.200595	0.312787
FJX1	0.276138	0.203267	0.316469
VEGFC	0.915245	0.204143	0.317339
EPDR1	1.02057	0.204145	0.317339
AKT3	0.156717	0.204445	0.317339
CENPW	0.0152579	0.205009	0.317726
LEPR	0.601051	0.207012	0.320223
TANC2	0.189338	0.207283	0.320276
FMO2	0.776932	0.207784	0.320806
IGLV1-41	0.0350948	0.208197	0.3212
DLGAP1-AS2	0.513933	0.212657	0.327091
PALM	0.967391	0.213206	0.327688
LPL	0.542793	0.214685	0.329492
LINC01615	0.963651	0.214703	0.329492
TSPAN8	0.557478	0.215138	0.32991
SORBS1	0.901528	0.216769	0.332161
MIR497HG	0.839458	0.218871	0.334627
RNF217	0.354275	0.222036	0.338704
CPLX1	0.855373	0.223418	0.340558
STXBP1	0.284642	0.225393	0.343312
OBSL1	0.248327	0.225848	0.343491
HOXB-AS1	0.278527	0.226327	0.343707
MAP3K12	0.412025	0.228462	0.346176
C11orf70	0.693685	0.230562	0.349097
DNAJC18	0.0977418	0.231032	0.34929
MARCO	0.157862	0.236114	0.356181
MPDZ	0.41533	0.237788	0.35844
CFP	0.358802	0.239119	0.36018
RNASE4	0.200641	0.241535	0.363283
PRR34-AS1	-0.0632362	0.242385	0.364293
DVL2	-0.0633839	0.243851	0.366226
ST6GALNAC3	0.574568	0.245947	0.369079
NUDT12	0.300904	0.246113	0.369079
F8A1	0.576042	0.24676	0.369776
RNF180	0.895719	0.248294	0.371803
PCED1A	-0.0240329	0.250802	0.375282
PTBP2	0.0295606	0.2512	0.375602
ACAP3	-0.0407911	0.252202	0.376824
TDRP	0.766994	0.254212	0.379549
IL10RB-AS1	0.502326	0.255831	0.381687
EGR3	0.249275	0.256267	0.381778
ZNF516	0.644665	0.258345	0.384311
TMEM80	-0.15803	0.258763	0.384653
NMU	0.657492	0.259961	0.386152
PCSK5	0.695413	0.262327	0.389099
MTRNR2L1	0.906339	0.262653	0.3893
ALDH1A1	0.0632841	0.265767	0.393343
MMP15	0.386461	0.269009	0.397853
MEOX1	0.87694	0.269307	0.398004
IGLV5-45	-0.254814	0.269602	0.398152
POLI	0.106811	0.270955	0.39957
RFTN2	0.923556	0.271861	0.400617
PLAT	0.220793	0.273096	0.401856
PCMTD2	0.0310088	0.27333	0.401909
CHST7	-0.129674	0.274512	0.403065
PDE4C	1.02009	0.280917	0.411286
KCTD15	0.39959	0.282233	0.412618
CFB	0.207755	0.284754	0.416006
CCNB2	0.0375822	0.289325	0.422382
GTF2IRD2	0.15081	0.289589	0.422464
HOXC6	0.488398	0.291438	0.424833
PLPP3	0.137165	0.29163	0.424833
NFATC4	0.690726	0.293511	0.427179
TIMM10B	-0.0131311	0.293659	0.427179
BPGM	-0.184035	0.295208	0.429125
HIST2H2BF	0.287086	0.295851	0.429753
UNK	-0.163531	0.299699	0.434414
MORN4	0.422973	0.30212	0.437302
SARNP	-0.0298373	0.302452	0.437472
HIC1	0.423974	0.306514	0.443032
ACACB	0.62258	0.308987	0.446095
STEAP1	0.111622	0.310156	0.447345
MXRA7	0.336673	0.310527	0.447563
COL12A1	0.214202	0.31282	0.450232
ASPN	0.653033	0.314143	0.45118
PITPNM2	0.180215	0.315638	0.453007
ULK2	0.232478	0.316125	0.453387
CXorf21	-0.0673725	0.318707	0.456127
MMP9	0.115776	0.322595	0.461368
IGHV3-20	0.0970734	0.326645	0.466832
FBN1	0.161213	0.328442	0.468589
VSTM4	0.730215	0.328564	0.468589
GPNMB	0.0800432	0.329592	0.469727
ZNF583	0.236998	0.330536	0.470695
BLOC1S5	0.135729	0.330734	0.470695
VEGFB	0.182557	0.335065	0.476194
SUGCT	0.788559	0.336771	0.478285
TNC	0.214745	0.337281	0.478666
PXDC1	0.320453	0.338068	0.478666
DNMBP	0.375759	0.338153	0.478666
TMOD1	0.58265	0.338213	0.478666
RAB12	0.585743	0.339156	0.479295
DCLK2	0.940274	0.339508	0.479295
KCNJ2	0.961329	0.339598	0.479295
PPAN	-0.0893203	0.341957	0.481704
APCDD1	0.545825	0.344085	0.484285
IGHV3-64	0.389177	0.349185	0.490785
ZBTB46	0.715669	0.352185	0.494661
ABHD17B	-0.119374	0.354599	0.497708
INSIG2	-0.11409	0.355506	0.498295
MXD4	-0.13309	0.356035	0.498694
INTU	0.205793	0.360726	0.504917
ZNF641	0.0499987	0.361193	0.505224
AP000769.1	-0.0496651	0.361742	0.505645
FOXC1	0.337921	0.362361	0.506163
FBXL13	0.539546	0.363593	0.507536
IL1R1	0.268245	0.372073	0.518308
RRM2	-0.0562072	0.372359	0.518353
ADAMTS12	0.370081	0.374747	0.520965
CPT1C	0.629748	0.379631	0.526677
EBI3	0.00524169	0.381649	0.528757
CARD10	0.804198	0.382224	0.529193
HS2ST1	-0.112427	0.38377	0.530973
SDHD	-0.157925	0.385583	0.532037
RUSC2	0.661062	0.386523	0.532899
CLEC11A	0.137106	0.386731	0.532899
SMCR5	0.334427	0.393454	0.539973
DPYSL3	0.321783	0.399532	0.546474
C16orf86	0.259604	0.402279	0.549126
ZNF740	0.0109241	0.402828	0.549507
ZNF28	0.0525329	0.405109	0.551919
FLCN	0.151497	0.405525	0.55199
TNFSF15	0.538469	0.407121	0.55351
BAHCC1	0.543799	0.411554	0.558048
CCDC144A	0.313306	0.422367	0.570452
CORO7	-0.0117569	0.422519	0.570452
PODXL	0.302577	0.422918	0.570452
ACHE	0.694202	0.424007	0.571107
NR2C1	-0.0598651	0.424267	0.571107
PCOLCE2	0.537439	0.425215	0.571628
HMGCL	-0.155016	0.428906	0.575452
SLC39A13	0.00189131	0.434069	0.580468
IGHG2	-0.0317474	0.435219	0.581568
POLR2J2	0.142163	0.435748	0.581568
IGHV3-7	-0.180763	0.437637	0.583707
IGHV3-43	-0.286458	0.438056	0.583884
SPOCD1	0.667296	0.438631	0.584268
ARHGEF11	0.383619	0.439562	0.584836
TMEM108	0.300071	0.439631	0.584836
SLC6A9	0.445042	0.4434	0.589081
LGALS2	0.170546	0.449374	0.596481
BCYRN1	0.427609	0.455998	0.603457
FCRL5	-0.597043	0.458587	0.606096
SPNS2	0.531303	0.459536	0.606599
CTSF	-0.0199977	0.461067	0.608191
ZBED3	0.246948	0.461398	0.608233
ZCCHC14	0.115217	0.467437	0.615796
FAM89B	-0.0616432	0.468498	0.616796
TMEM44	0.186617	0.471266	0.619639
FBXL3	-0.139929	0.47178	0.619757
SMAD4	-0.111372	0.472057	0.619757
LINC00987	0.298372	0.473251	0.620646
ANTXR1	0.205562	0.474084	0.621339
SMN1	0.216283	0.476956	0.624301
SUCLA2	-0.126986	0.47821	0.625139
WNT6	0.675582	0.480299	0.627193
EHD3	0.448825	0.480397	0.627193
CPXM2	0.757239	0.485603	0.632774
KLHL15	0.0179497	0.488591	0.636261
FRMD6	-0.00524163	0.488936	0.636303
TYMS	-0.142249	0.492921	0.640264
C2orf40	0.332074	0.493556	0.64068
HIST1H1C	-0.16603	0.497479	0.64495
IGHV3-33	0.0490276	0.499644	0.646935
AMFR	0.0079622	0.500204	0.647248
ZNF384	-0.0755111	0.501814	0.648456
VARS2	-0.123104	0.502092	0.648456
B3GAT2	-0.111908	0.50242	0.648468
SPRY1	-0.00476626	0.502848	0.64861
PLA1A	0.615348	0.506148	0.652042
IGHA2	0.152955	0.50766	0.653576
SYTL4	0.69474	0.512604	0.658693
KCNE1	0.416215	0.516291	0.662033
FKBP7	0.0861345	0.518013	0.662716
MIF-AS1	-0.102838	0.519921	0.66391
ZNF165	0.0118366	0.520525	0.664265
IGLV2-11	-0.190393	0.521335	0.664486
NHSL1	0.187138	0.521351	0.664486
C4orf46	0.060775	0.522287	0.665263
LYSMD3	-0.18495	0.523532	0.665845
FAM171B	0.350883	0.525929	0.668231
C11orf95	0.380703	0.52675	0.668442
CDKL3	0.208937	0.528032	0.669651
CLDN11	0.68104	0.530516	0.672383
ZNF354A	-0.0681791	0.53347	0.675253
RIOK2	-0.257483	0.533775	0.675253
HAAO	0.146968	0.536458	0.677386
HOXB3	0.480069	0.53684	0.677449
FGFR1	0.0731508	0.541548	0.682112
TAF1C	0.0281128	0.542214	0.682112
PABPC3	0.237194	0.542377	0.682112
FAM171A1	0.231489	0.542544	0.682112
CCL19	0.483181	0.54365	0.68266
HEPH	0.506926	0.546238	0.685067
MAP2	0.502433	0.547246	0.685546
P3H1	-0.0477017	0.547293	0.685546
PLEKHG1	0.061934	0.553431	0.691535
RTN4RL2	0.594413	0.554863	0.692899
MXRA8	0.0910704	0.555218	0.692918
CX3CR1	0.288916	0.556274	0.693811
PLEKHA4	0.308663	0.560559	0.697258
KDELR3	-0.0744443	0.561983	0.697941
LRRC49	0.535791	0.563397	0.698653
OLFML1	0.404307	0.563476	0.698653
FAM160A2	-0.108825	0.564636	0.699531
PINLYP	0.447769	0.567237	0.7019
LINC00309	0.320406	0.570167	0.705097
SLC35A1	0.0955149	0.575005	0.709788
ZNF449	0.245902	0.575357	0.709793
FAM110B	0.253484	0.575823	0.709938
MMP11	0.0654043	0.577218	0.711227
BIRC5	-0.109442	0.57895	0.7125
UGDH	-0.010911	0.579429	0.712659
SCARF2	0.432567	0.5819	0.714835
IGKV1D-39	-0.0192724	0.58373	0.716651
OTOA	0.46978	0.584196	0.716793
DGKH	-0.101106	0.586486	0.719169
IGHG3	-0.098178	0.587849	0.720407
DLGAP5	-0.10471	0.589434	0.721915
COL7A1	0.210274	0.591688	0.724241
CACNA1C	0.592722	0.592374	0.724339
SOX13	0.150304	0.592479	0.724339
ZNF445	0.00552323	0.593162	0.724462
P3H4	0.0234977	0.595181	0.7259
TLE2	0.422715	0.597466	0.727865
SYTL2	-0.164967	0.597507	0.727865
SLC45A4	0.0108069	0.600478	0.729891
IGKV1D-8	0.0797096	0.600602	0.729891
FGF1	0.572492	0.603165	0.731136
MATN3	0.570443	0.603536	0.731136
IGKV1D-16	0.276823	0.603779	0.731136
ADAMDEC1	0.111524	0.606482	0.733537
RGS4	0.430352	0.608023	0.734965
PAN3	-0.0481198	0.610788	0.73787
NIPSNAP3B	0.23994	0.611348	0.738109
CLDND1	-0.244539	0.617194	0.743311
CAMTA2	-0.12399	0.617481	0.743311
PBLD	0.184838	0.620145	0.746078
LRP12	0.250633	0.631188	0.756013
MAPK11	0.208123	0.631371	0.756013
ZMYM6	-0.00774288	0.632219	0.756485
FAM27C	0.229535	0.63311	0.756761
ZDHHC2	-0.00724186	0.636533	0.759192
CDKN3	-0.144574	0.636931	0.759192
PLA2G7	0.127708	0.637501	0.759338
ADCY9	0.310261	0.640136	0.762031
GNPDA2	-0.104638	0.641091	0.762723
IL20	0.120766	0.64458	0.765979
NOV	0.641072	0.645229	0.766304
IGHV3-49	0.296239	0.645638	0.766343
SETDB2	-0.184557	0.64745	0.767054
VASN	0.0879317	0.650676	0.769785
BBS10	0.031788	0.650805	0.769785
FBXL17	-0.202879	0.654051	0.772687
ADAMTS6	0.0551312	0.658251	0.775788
APOBR	-0.0212178	0.659019	0.775788
TBCEL	0.14629	0.659143	0.775788
FAM157C	0.208722	0.659873	0.775788
RASD2	0.215866	0.659903	0.775788
RRAGD	0.137791	0.6607	0.775788
CREB3L1	0.139024	0.660819	0.775788
TRAF3IP2-AS1	-0.0306281	0.662727	0.777034
DGCR6	0.316573	0.663354	0.777034
CDK1	-0.0734325	0.663386	0.777034
MB21D2	0.269034	0.663415	0.777034
ITPR1	-0.311569	0.665051	0.778181
PPT2	0.263849	0.665157	0.778181
KLHL13	0.276213	0.666871	0.779738
IGLV4-69	-0.589021	0.668051	0.78067
IGKV1D-13	-0.0404635	0.669803	0.781821
ADAMTS5	0.398795	0.673251	0.784049
MATN2	0.308218	0.675075	0.785724
KMT2D	-0.18783	0.679985	0.790153
AGAP9	0.269943	0.680724	0.790153
GDF11	-0.0339638	0.680773	0.790153
PAQR7	0.279004	0.680819	0.790153
CTPS2	0.00513603	0.681463	0.79045
ZBED6	-0.157413	0.683286	0.791664
MED14OS	0.0897955	0.68407	0.791786
PTGER3	0.170778	0.684169	0.791786
ZNF2	0.0291608	0.685075	0.792385
ARL6	0.0316033	0.688179	0.795524
IGF1	-0.203443	0.691128	0.798481
EPHA4	-0.166287	0.691678	0.798662
IGF2	0.206986	0.693955	0.799481
TGFB3	0.125538	0.696344	0.801779
TRIM66	0.0592972	0.69716	0.802265
TLL1	0.589445	0.697789	0.802536
TBKBP1	0.144257	0.698598	0.803014
PLIN2	-0.0999604	0.700423	0.803904
STC2	-0.0681003	0.700743	0.803904
C8orf58	0.0915627	0.706096	0.80844
ZNF620	0.0411806	0.707969	0.810129
SNAPC3	-0.189287	0.714083	0.81621
IGFBP3	0.20648	0.724599	0.826838
JAG2	0.301208	0.728819	0.830615
BMP2	0.618824	0.730804	0.832055
TNXB	0.166901	0.732444	0.832992
STRIP1	-0.250245	0.733887	0.833627
S100B	0.0119483	0.73423	0.833627
IGHV3-74	-0.203562	0.737437	0.835871
GALNT5	0.307966	0.746476	0.84275
BRMS1L	-0.160686	0.754397	0.848488
GPC6	0.321719	0.755741	0.849063
RABL2A	0.077452	0.757052	0.84956
ANKRD6	0.288577	0.757434	0.84956
PRRG1	0.348667	0.763645	0.854264
MAPKBP1	-0.140948	0.764411	0.854264
LRRC37B	-0.0740668	0.764569	0.854264
STARD9	-0.0925206	0.767405	0.855019
AASS	0.284954	0.767702	0.855019
IGHV3-11	-0.400959	0.76802	0.855019
SLC45A1	0.143602	0.768094	0.855019
RND1	-0.144194	0.770325	0.85601
B3GALNT1	0.0549431	0.772529	0.857606
FKBP1B	0.181443	0.772798	0.857606
ZBTB26	0.160903	0.773987	0.857894
RALGPS2	-0.487484	0.777017	0.860163
TWIST1	0.541373	0.777909	0.86055
LINC01569	-0.0883946	0.778273	0.86055
HRCT1	0.325813	0.782869	0.864296
IGKV1-12	-0.14533	0.789786	0.869575
TFF1	-0.396091	0.793186	0.872376
RNU12	-0.284963	0.793644	0.872409
MAP3K6	-0.19355	0.79761	0.874238
TSIX	-0.132563	0.797666	0.874238
IGKV1-17	0.0147283	0.799204	0.874238
NLGN2	0.24687	0.80008	0.874238
NDN	0.287343	0.800227	0.874238
IGHG4	0.0558225	0.800455	0.874238
IGKV1-39	-0.263902	0.810707	0.882155
CSGALNACT2	-0.13795	0.813206	0.884373
CRYZL1	-0.17313	0.818203	0.887587
GOLGA6L9	-0.0731359	0.81834	0.887587
SGCB	0.0605311	0.821099	0.889633
ADRB2	-0.224951	0.822027	0.890165
PTPN13	-0.247715	0.823216	0.89098
STON1	0.402162	0.824058	0.891417
NRXN2	0.228952	0.827338	0.894491
FBXO4	-0.250114	0.829242	0.896074
CERCAM	-0.0641291	0.83121	0.897725
ABCB1	-0.278521	0.833093	0.899208
KDELC1	-0.0512129	0.833466	0.899208
HVCN1	-0.292751	0.839963	0.905259
HOXA3	0.329227	0.848978	0.913043
IGKV3D-20	0.0960882	0.850289	0.913511
EML1	0.261499	0.851429	0.913511
PELI3	0.0823304	0.851587	0.913511
IGHV4-59	0.0163824	0.860739	0.9218
AC147651.4	-0.0696478	0.863153	0.923415
IGKV1-27	-0.195465	0.865783	0.925257
SULF2	0.0729855	0.867536	0.926645
PARD6G-AS1	-0.040744	0.874375	0.931996
LAMP5	-0.252495	0.876715	0.933455
CPXM1	0.060678	0.877118	0.933455
FAM41C	0.0789354	0.878577	0.933828
IGHV1-69	-0.683027	0.878933	0.933828
CCDC71L	-0.10553	0.879753	0.933828
ZNF684	-0.22257	0.880632	0.933828
HIST1H4E	-0.193933	0.882598	0.933828
APOC2	0.0866845	0.883458	0.933828
ZNF189	-0.163384	0.88417	0.933828
DDX47	-0.20988	0.885043	0.933828
KIF26B	0.188889	0.885658	0.933828
VCAN	0.0650093	0.885716	0.933828
CCNJL	-0.0129261	0.886914	0.934608
TDO2	-0.0763404	0.889924	0.93681
IGHV4-61	-0.365543	0.892537	0.938917
STRIP2	-0.206703	0.892847	0.938917
NIPAL1	-0.198818	0.896277	0.940229
FLRT2	0.128813	0.896769	0.940229
CNKSR3	0.0618414	0.898548	0.941512
SULF1	-0.00499736	0.899933	0.942048
PRRT2	0.133023	0.899984	0.942048
FAN1	-0.135109	0.902176	0.943858
EFNA1	-0.107779	0.909417	0.946588
RCN3	0.0190235	0.916101	0.950618
CD200	-0.339034	0.920134	0.952632
NPW	-0.214813	0.920379	0.952632
ZNF783	-0.192615	0.924223	0.955155
ZNF182	-0.208207	0.926892	0.956941
GOLGA8A	-0.250371	0.926982	0.956941
BNC2	0.103045	0.92736	0.956941
IGKV3D-15	-0.124035	0.930016	0.959197
GABBR1	0.0722781	0.931826	0.960485
YAP1	-0.0318266	0.932332	0.960485
SLC41A1	-0.336303	0.933231	0.960568
EDN2	-0.107006	0.935567	0.961251
COL6A3	-0.0469137	0.936725	0.961251
IL4I1	-0.113806	0.937504	0.961334
DLX2	0.00292523	0.937773	0.961334
RBM45	-0.254544	0.93822	0.961334
ADTRP	-0.602032	0.94167	0.963415
ZNF26	-0.32646	0.943836	0.965146
HILPDA	-0.0547967	0.951707	0.969305
ITGA6	-0.00905821	0.953237	0.970243
CRTC2	-0.276783	0.95655	0.972294
EGR4	-0.0379421	0.963593	0.977016
CLN5	-0.265216	0.968404	0.978972
TRIB2	-0.21156	0.969838	0.979935
DNMT3B	-0.187077	0.976273	0.985274
IGHV3-53	-0.495864	0.976572	0.985274
BATF2	0.0925307	0.977319	0.985399
NME5	-0.0473611	0.978147	0.985399
ZFP30	-0.283388	0.985968	0.991351
SDR42E2	-0.428922	0.986827	0.991496
ABCA8	0.0259597	0.989064	0.991496
NPIPA1	-0.188931	0.994376	0.995353
LZTR1	-0.195328	0.997694	0.997694
UBE2C	-0.121112	0.995757	0.996246
CCNG2	-0.21289	0.991402	0.992863
TCEAL7	0.0234761	0.989662	0.991608
RABL2B	-0.198669	0.988821	0.991496
ZNF169	-0.271099	0.988533	0.991496
ACY3	-0.743045	0.988357	0.991496
PLA2G2D	-0.333969	0.987534	0.991496
LINC01001	-0.0460623	0.986	0.991351
IGHV4-31	-0.18011	0.980068	0.98636
SLPI	-0.10005	0.979087	0.98586
AGAP4	-0.156484	0.977756	0.985399
CBX7	-0.309861	0.972663	0.982303
MEDAG	0.0924994	0.966417	0.977448
FUT4	-0.000983161	0.9658	0.977309
P4HA3	-0.0604564	0.965376	0.977309
MT1G	-0.105819	0.965009	0.977309
POU2AF1	-0.68147	0.964367	0.977309
COL27A1	0.0228467	0.960797	0.974666
ZBTB22	-0.196047	0.960468	0.974666
CD72	-0.250557	0.957712	0.972504
FST	-0.00345165	0.957466	0.972504
RARRES2	-0.237108	0.955929	0.972147
ELN	0.174261	0.95358	0.970243
HOXC8	0.084324	0.950476	0.968535
ZFAND2A	-0.183535	0.949731	0.96826
CLU	-0.0148151	0.949421	0.96826
CDC20	-0.0790534	0.949044	0.96826
KRT6B	-0.39675	0.948894	0.96826
PCDHGA10	-0.0370107	0.947974	0.96826
EVC2	-0.404479	0.944539	0.965381
PLSCR4	0.179241	0.94163	0.963415
RSPO3	-0.172762	0.939897	0.962568
PTX3	0.0536378	0.936514	0.961251
ARF4-AS1	-0.435955	0.936112	0.961251
STAC2	-0.0571795	0.935251	0.961251
FBXL8	-0.348226	0.935016	0.961251
PPP1R3D	-0.249103	0.932679	0.960485
ARMCX4	-0.0175189	0.923701	0.9551
RGS13	-0.632809	0.921888	0.95371
MZB1	-0.117197	0.919747	0.952632
CLDN15	-0.0332363	0.919517	0.952632
LINC00685	-0.40598	0.917969	0.952071
KCTD17	-0.310915	0.914371	0.949307
PTCH2	-0.244672	0.913524	0.94891
FGFBP1	-0.276351	0.912664	0.9485
RPF1	-0.277611	0.912587	0.9485
ZNF787	-0.135594	0.911908	0.9485
ALPL	0.0208835	0.90943	0.946588
FBXL20	-0.319912	0.909405	0.946588
HAMP	-0.152841	0.908242	0.946588
GAPT	-0.309829	0.908017	0.946588
ZNF626	-0.317726	0.906944	0.946417
PLK1	-0.158501	0.906593	0.946417
KLHL42	-0.169984	0.904833	0.945182
MSC	-0.179056	0.903202	0.943962
ZFP1	-0.327979	0.90286	0.943962
MMP1	-0.564161	0.896862	0.940229
CCNA2	-0.209862	0.896292	0.940229
NTM	-0.130331	0.895645	0.940229
TTC30A	-0.45639	0.895214	0.940229
CHIC1	-0.521841	0.888428	0.935719
IGKV3-7	-0.738343	0.885614	0.933828
ELOVL4	-0.234657	0.884743	0.933828
IGFBP6	-0.143515	0.883364	0.933828
MESP1	-0.240348	0.883118	0.933828
IRS2	-0.102706	0.881631	0.933828
CH25H	-0.269319	0.881092	0.933828
FAAP24	-0.254608	0.880922	0.933828
SERP2	-0.401765	0.877912	0.933812
VCAM1	-0.0691421	0.876794	0.933455
FOXK1	-0.193815	0.873234	0.931267
KCNS3	0.0148243	0.872042	0.930482
TSTD3	-0.263081	0.869445	0.928197
SAMD11	-0.171702	0.86531	0.925237
RASSF8	0.031502	0.861311	0.921928
FFAR2	0.0199183	0.860628	0.9218
ZNF23	-0.342134	0.857312	0.919096
H3F3C	-0.279558	0.851654	0.913511
ZNF525	-0.421813	0.850975	0.913511
MIR181A2HG	-0.316487	0.845088	0.90934
FBXO3	-0.232006	0.841059	0.905483
RNF165	0.0537015	0.840649	0.905483
IGLV6-57	-0.522758	0.839143	0.904854
COL5A1	-0.148885	0.820866	0.889633
SCGB1B2P	-0.142166	0.817187	0.887281
TMEM147-AS1	-0.295339	0.815449	0.885867
HAS2	-0.126898	0.814342	0.885136
DNM3OS	-0.141204	0.810734	0.882155
PIGR	-0.251636	0.80832	0.880468
PGAP1	-0.554502	0.804244	0.876497
ANKRD28	-0.350782	0.802968	0.875575
MPZ	-0.48741	0.801942	0.874924
ZNF649	-0.363069	0.801848	0.874924
UPRT	-0.445943	0.799273	0.874238
ACVR2A	-0.164277	0.799097	0.874238
ZNF383	-0.458405	0.798795	0.874238
SCGB3A1	-0.110134	0.796651	0.874238
JCHAIN	-0.0652026	0.796387	0.874238
ZNF521	0.11246	0.794516	0.872897
FMO4	-0.398787	0.79134	0.870815
ZBTB10	-0.145492	0.78975	0.869575
C3	-0.133053	0.788655	0.86927
MTERF1	-0.325537	0.784144	0.864764
IRS1	-0.152866	0.783739	0.864764
UBD	-0.141505	0.78287	0.864296
C1QTNF4	-0.205114	0.778633	0.86055
P2RX5	-1.26072	0.775382	0.85882
F2RL1	-0.504471	0.774125	0.857894
NKX3-1	-0.46668	0.773024	0.857606
ZCCHC4	-0.367546	0.769297	0.855334
CTHRC1	-0.286317	0.769233	0.855334
RBAK-RBAKDN	-0.406038	0.768175	0.855019
ERAP2	-0.393334	0.7654	0.854264
TNFAIP6	-0.0157583	0.765377	0.854264
HBB	-0.0326159	0.764172	0.854264
LIN9	-0.39598	0.761282	0.852469
IGHV3-66	-0.678038	0.760201	0.851726
TIFA	-0.349678	0.759302	0.851187
ZNF543	-0.443253	0.75699	0.84956
CCDC74A	-0.262514	0.755186	0.848908
ZNF345	-0.463953	0.753822	0.848309
COPS8	-0.148008	0.753777	0.848309
F10	-0.126283	0.753151	0.848309
ZSWIM4	-0.250441	0.75188	0.847528
AGR3	-1.03285	0.747228	0.84275
PTPN3	-0.393142	0.746843	0.84275
GALNT16	-0.195163	0.7459	0.842652
ANGPTL1	-0.154922	0.744776	0.841849
MADCAM1	-0.634028	0.744532	0.841849
SPEG	0.00782549	0.7431	0.840887
GSKIP	-0.291852	0.742258	0.840401
RAVER2	-0.163704	0.738643	0.836772
EGLN3	-0.113212	0.737223	0.835871
ATP8B2	-0.735054	0.736374	0.835596
CCDC80	-0.172554	0.733552	0.833627
IL11RA	-0.322118	0.732329	0.832992
TTC32	-0.359452	0.729132	0.830615
IGHV5-51	-0.434618	0.727374	0.82954
RUNX1T1	-0.212324	0.722242	0.82461
PLA2G2A	-0.343163	0.715805	0.817719
ADAM33	-0.407191	0.709287	0.811182
AK9	-0.36978	0.705403	0.808101
HAND2	-0.461495	0.702439	0.805158
TOP2A	-0.323676	0.700951	0.803904
NBL1	-0.238739	0.700576	0.803904
IGKV2-24	-1.16602	0.693714	0.799481
HSPB2	0.20448	0.692827	0.799084
TTYH1	-0.265127	0.692513	0.799084
GK	-0.181691	0.682609	0.79133
SPC25	-0.321548	0.679448	0.790153
IGLV3-9	-0.693065	0.672318	0.78341
MED26	-0.363742	0.671979	0.78341
CD1C	-0.60712	0.671326	0.783149
SNTA1	-0.272083	0.669139	0.781493
NSUN3	-0.388277	0.660828	0.775788
ZEB1-AS1	-0.297042	0.658551	0.775788
IFFO2	-0.532351	0.654775	0.772687
IDO1	-0.302949	0.654413	0.772687
HSD11B1	-0.501986	0.651332	0.769962
SNX7	0.0252848	0.647743	0.767054
FBXO48	-0.427078	0.64666	0.766662
CAPS	-0.531673	0.64664	0.766662
PLLP	-0.16577	0.642873	0.764396
CIART	-0.121422	0.637006	0.759192
KMT2E-AS1	-0.451569	0.63648	0.759192
ZNF701	-0.581165	0.63609	0.759192
CBWD5	-0.259766	0.632507	0.756485
ZNF507	-0.518795	0.62744	0.75219
SMAD6	-0.264369	0.625908	0.750795
H6PD	-0.282502	0.62476	0.749859
ADAM28	-0.534628	0.622921	0.748092
GPRC5A	-0.208439	0.622775	0.748092
LIF	-0.435844	0.621573	0.747355
CHKB	-0.514786	0.617431	0.743311
HIST1H3C	-0.520082	0.614659	0.741228
CLIC5	-0.84539	0.612815	0.739441
RBM7	-0.249211	0.605735	0.733069
LRRC17	-0.257261	0.603001	0.731136
EN1	-0.322945	0.602986	0.731136
FAM109B	-0.277397	0.602808	0.731136
IGLV8-61	-1.34169	0.600003	0.729891
CCL22	-1.06317	0.598941	0.729177
DIRAS3	-0.435537	0.594294	0.725252
TTC33	-0.558338	0.593291	0.724462
PRRX2	-0.327916	0.580125	0.713085
IGKV2-30	-0.728277	0.57842	0.712278
NEK8	-0.610956	0.573828	0.708764
IGHV3-15	-0.65645	0.571874	0.70678
ING3	-0.360883	0.56709	0.7019
PSORS1C2	-0.568352	0.563585	0.698653
MYBL1	-0.740388	0.561091	0.697258
TBC1D19	-0.563787	0.561004	0.697258
MYOM2	-0.812383	0.560412	0.697258
IGKV1-8	-0.316235	0.559497	0.696977
PHC1	-0.259096	0.559407	0.696977
HIST1H2AL	-0.614641	0.552663	0.690998
COCH	-0.767207	0.549909	0.687976
IGKV1-6	-0.369138	0.549719	0.687976
ZBTB40	-0.461898	0.545522	0.68459
INTS6	-0.220784	0.542933	0.682181
CBWD3	-0.532081	0.539337	0.679759
GPM6B	-0.230814	0.538946	0.679685
IGLV2-23	-0.122559	0.536064	0.677308
AMIGO2	-0.726406	0.534306	0.675506
FGF2	-0.146675	0.533702	0.675253
SCRG1	-0.376812	0.526475	0.668442
TPBG	-0.165332	0.523724	0.665845
HIST1H1A	-0.441937	0.523617	0.665845
IGHV4-4	-1.13066	0.518742	0.662819
LRMP	-0.615549	0.518336	0.662716
INHBA	-0.239107	0.518294	0.662716
PCDH18	-0.307539	0.516827	0.662033
ZNF550	-0.736572	0.516732	0.662033
CREBRF	-0.323172	0.515687	0.66182
GPS2	-0.423727	0.515114	0.661501
ARHGAP28	-0.74407	0.510235	0.656062
TNFSF9	-0.636177	0.509277	0.655244
SUSD2	-0.104681	0.505377	0.65146
LINC01235	-0.0543362	0.501305	0.648261
GLIS2	-0.292844	0.498123	0.645375
ITGA11	-0.78949	0.494885	0.641996
TWIST2	-0.23882	0.490823	0.637945
FBXO32	-0.227018	0.489763	0.636973
TDP2	-0.277731	0.48493	0.632302
IGLV1-47	-0.291031	0.483003	0.630192
MSX2	-0.359961	0.477443	0.624537
VWA5A	-0.333847	0.474731	0.621787
PRAF2	-0.229765	0.472268	0.619757
MMP16	-0.709393	0.469786	0.618092
RARRES1	-0.315928	0.459563	0.606599
LINC01436	-0.135407	0.45765	0.60525
PRR5L	-0.761331	0.454903	0.602399
IFIT1	-0.306304	0.45374	0.601249
IGKV2-29	-0.812509	0.453437	0.60124
IGKV3D-11	-0.313347	0.449556	0.596481
GULP1	-0.0357855	0.440445	0.585536
TBX3	-0.221752	0.435502	0.581568
NINL	-0.683254	0.433332	0.579863
HIST1H1B	-0.509775	0.430496	0.576446
NR2F1-AS1	-0.231561	0.430079	0.576267
SVEP1	-0.824829	0.429721	0.576165
TRDV1	-1.19644	0.428126	0.574783
IL23A	-1.10097	0.427498	0.574318
FABP3	-0.217999	0.424589	0.571164
DUSP5	-0.407861	0.424009	0.571107
DCLK1	-0.24555	0.422941	0.570452
MALL	-0.0997385	0.421567	0.570108
MCM3	-0.3477	0.420592	0.569168
CHRDL1	-1.12833	0.417178	0.564923
F2RL2	-0.860428	0.417021	0.564923
PI15	-0.203073	0.410217	0.556606
FAP	-0.260784	0.409384	0.555846
SLIT2	-0.247905	0.40889	0.555545
FBLN2	-0.146812	0.405732	0.55199
KCNQ1OT1	-0.168027	0.405138	0.551919
PLA2G6	-0.78756	0.401531	0.548473
KLRF1	-1.37853	0.40148	0.548473
SPIB	-0.934733	0.399277	0.546474
NOVA1	-0.866875	0.398799	0.546204
RNF39	-0.225949	0.397268	0.544473
TRMT11	-0.340214	0.396762	0.544146
CCL3	-0.155708	0.391675	0.537894
PGR	-1.42183	0.39076	0.536999
CYP27A1	-0.164663	0.389112	0.535095
LOXL1	-0.0184459	0.387995	0.533919
ADGRA3	-0.413009	0.387053	0.532983
PDE7B	-0.846669	0.385325	0.532037
PTGIS	-1.29219	0.384804	0.531682
IGHV1-24	-0.964665	0.384298	0.531342
HMCN1	-0.895085	0.380734	0.527848
SH2D1B	-1.32756	0.3776	0.524216
LINC01480	-0.827564	0.376462	0.522992
PYDC1	-1.45801	0.374678	0.520965
MANEA-AS1	-0.868069	0.366065	0.510287
PLD4	-0.539224	0.365619	0.510014
IL1R2	-0.613215	0.355025	0.497964
BHLHE40-AS1	-1.83063	0.344887	0.485079
ATP10A	-0.759615	0.342014	0.481704
ITGBL1	-0.640886	0.341412	0.481521
TRGC1	-1.49951	0.339501	0.479295
DDX19A	-0.378987	0.338082	0.478666
CYP1B1	-0.389615	0.334475	0.475687
FAM69A	-0.753185	0.327702	0.468015
NSG1	-1.25731	0.317718	0.455032
HLA-DOB	-0.958444	0.317465	0.454988
PDPN	-0.458528	0.313977	0.45118
TGFBR3	-0.379369	0.313423	0.45078
JAKMIP2	-1.88069	0.31152	0.448677
PRTFDC1	-0.197803	0.309071	0.446095
KLRC3	-1.31394	0.30085	0.435773
GCSAM	-1.6929	0.297846	0.432035
CMPK2	-0.541939	0.297662	0.432035
CTSK	-0.367097	0.281509	0.411855
ALKBH6	-0.578267	0.280886	0.411286
MZF1-AS1	-0.700802	0.278645	0.408545
SLC12A2	-0.209261	0.274775	0.403162
RASGRP2	-0.63885	0.273957	0.402541
TMEM119	-0.378538	0.272091	0.400666
ABCA10	-1.64999	0.270797	0.39957
LOX	-0.315345	0.265529	0.393276
ANO1	-0.142933	0.261914	0.38877
CXCL9	-0.346442	0.256536	0.3819
TMEM158	-0.383209	0.256116	0.381778
NUSAP1	-0.373079	0.240608	0.362155
ADAM12	-0.450191	0.23366	0.352739
GPC3	-0.848125	0.233166	0.352255
RASGEF1B	-0.29872	0.230981	0.34929
PCDH9	-0.454285	0.227617	0.345152
TRGV3	-1.57671	0.227205	0.344783
CDO1	-0.847775	0.226219	0.343707
RADIL	-0.99548	0.225793	0.343491
IGLV1-44	-0.418474	0.220852	0.337151
EVI2B	-0.46474	0.220163	0.336351
PDS5B	-0.324779	0.218575	0.334426
IGKV1-16	-0.373649	0.21708	0.332388
KLRC2	-2.09714	0.210465	0.323964
LAMP3	-1.23683	0.209161	0.322199
STAP1	-1.44267	0.208793	0.321876
KLK1	-1.78356	0.207092	0.320223
APOBEC3F	-0.92019	0.20547	0.318197
PODN	-0.771533	0.204604	0.317339
CERS5	-0.48576	0.204575	0.317339
SFRP4	-1.04327	0.202585	0.315648
KRT23	-0.595717	0.20052	0.312787
ABCA2	-0.870554	0.194049	0.304678
CXCL11	-0.579565	0.19285	0.303029
NCK2	-0.44294	0.191417	0.301707
PIGL	-0.723224	0.191299	0.301707
GADD45G	-0.427308	0.190826	0.301243
CRISP3	-0.623819	0.190099	0.300327
TRGV5	-1.0075	0.189705	0.299938
LRRN3	-2.40878	0.188834	0.298792
CXCL10	-0.327531	0.187054	0.296436
SGCE	-0.121518	0.185087	0.293547
FBLN1	-0.345142	0.178891	0.284605
POSTN	-0.28481	0.178283	0.284304
ABTB1	-0.465382	0.176975	0.282661
TRBV4-2	-2.93214	0.175225	0.280306
LMCD1	-0.0986543	0.174358	0.279576
OSR1	-0.790061	0.173853	0.279128
COL10A1	-2.51395	0.173574	0.278978
DCX	-1.68599	0.171775	0.276305
TRAV38-2DV8	-3.10866	0.171632	0.276292
FCRL6	-2.17377	0.171578	0.276292
CCDC82	-0.381428	0.171095	0.276017
GLT8D2	-0.234729	0.170105	0.274921
HTRA3	-0.870294	0.169004	0.273357
CGREF1	-1.19682	0.168235	0.272329
SACM1L	-0.566374	0.163889	0.26614
TAC1	-2.60843	0.163625	0.265922
AL589743.1	-0.915489	0.162054	0.263929
PAX5	-2.46291	0.161837	0.263858
C5orf46	-0.950898	0.161317	0.263221
HOXB2	-0.442654	0.159453	0.261016
TRAV1-2	-3.84626	0.1588	0.260157
PTGDR	-1.4205	0.154227	0.25348
TRAV8-4	-3.7703	0.152448	0.250758
TOPORS	-0.414218	0.15186	0.249993
SCG5	-0.896932	0.150234	0.247716
LINC01285	-0.329398	0.147074	0.24349
NAF1	-0.429944	0.145182	0.240554
FCER2	-2.41213	0.145027	0.240554
TRBV27	-2.57606	0.144307	0.24008
MMP23B	-1.44294	0.143915	0.239623
SRPX	-0.233548	0.143665	0.239402
MRC2	-0.305338	0.142858	0.238253
KBTBD3	-0.57175	0.142746	0.238253
ABI3BP	-1.20015	0.142297	0.237706
OLFML3	-0.319397	0.137079	0.230312
SPTSSB	-0.572661	0.134182	0.225816
ABCA6	-1.05277	0.133611	0.22504
PDGFRL	-0.821063	0.13293	0.224361
TRAV16	-3.45436	0.132129	0.223283
SBSPON	-0.64586	0.131524	0.222444
CAPN6	-1.87868	0.129848	0.220342
WIPF3	-1.30182	0.129203	0.219429
PPWD1	-0.682651	0.128958	0.219234
ANKRD30A	-2.35076	0.125546	0.21429
LINC01481	-0.660741	0.124757	0.213301
PIGB	-0.779556	0.122313	0.209474
CCDC84	-0.519377	0.120149	0.206811
AHNAK2	-0.480274	0.120122	0.206811
IL2RA	-0.751783	0.118614	0.204513
FCRLA	-2.2716	0.116397	0.201094
CD22	-1.82036	0.115877	0.200644
SPOCK1	-2.18242	0.112794	0.196138
CUL9	-0.89717	0.111675	0.194524
TRAV2	-4.32075	0.111292	0.194023
CCZ1B	-0.531957	0.109092	0.19117
CILP	-2.10957	0.108133	0.189979
TRBV7-6	-3.34579	0.108001	0.18991
CAPN12	-1.36901	0.107529	0.189349
MIR4458HG	-0.400388	0.104744	0.184982
TRBV2	-3.89326	0.104318	0.184549
TRGV9	-2.10412	0.102206	0.18097
SERTAD4-AS1	-0.414724	0.101313	0.179544
NFKBID	-0.388056	0.100063	0.177794
ARRDC2	-0.620331	0.0948999	0.169711
FIBIN	-0.574222	0.0946838	0.169566
ASPM	-0.569475	0.092944	0.166743
PDGFD	-0.791865	0.0918623	0.165677
PIP	-1.34242	0.0906694	0.164107
COL16A1	-0.436318	0.0899399	0.163076
PCSK1N	-0.896289	0.0887992	0.161151
TMC5	-0.428037	0.0873271	0.159046
MAGEH1	-0.611409	0.0856789	0.156604
LCN2	-0.587829	0.0855631	0.156533
TRAV12-1	-2.51604	0.0852027	0.156026
CD160	-3.55992	0.0850024	0.155927
CYP4Z1	-0.85449	0.0834135	0.153288
ARHGAP24	-0.693324	0.0794407	0.146782
TNN	-3.53143	0.0788453	0.145983
IGHV3-30	-0.307793	0.0788335	0.145983
SGCD	-1.84871	0.07836	0.145709
MMP3	-2.06252	0.0777834	0.14477
TNFRSF13B	-2.20887	0.0774723	0.144322
TRAV17	-3.55344	0.0765797	0.143072
SMIM8	-0.45977	0.0749058	0.140311
IGHD	-3.45681	0.0730883	0.137285
MBIP	-0.468297	0.0725066	0.136318
CD83	-0.257714	0.0713745	0.134437
TRAV8-6	-3.93415	0.0694041	0.130968
CD19	-1.84154	0.068676	0.129835
IGHV2-26	-1.58608	0.0685086	0.129638
IGHV1-18	-0.598138	0.0679577	0.128715
FAM129C	-2.47114	0.0631206	0.120224
NDC80	-0.783403	0.0628696	0.11997
IGHV3-21	-0.219025	0.061861	0.118267
FCRL3	-3.63554	0.0605386	0.116175
SLC5A3	-0.438554	0.0599042	0.115392
AFF3	-1.55686	0.0597393	0.115183
NR2F1	-0.865405	0.0594203	0.114785
GABRP	-0.341965	0.0592903	0.114643
OGN	-1.91868	0.0586566	0.11385
CITED4	-0.638173	0.0539674	0.105149
TRBV5-1	-2.24535	0.0529532	0.103675
TRGC2	-2.54691	0.0513293	0.101072
TRAV21	-3.94832	0.0509436	0.100604
FAM3D	-1.03032	0.0509129	0.100604
IGHV4-34	-0.960289	0.0507184	0.100353
THBS2	-0.984822	0.0505199	0.100127
IGHM	-0.819092	0.0496445	0.0988043
KIR2DL4	-2.21817	0.0480169	0.0960339
F5	-3.23805	0.0473431	0.0950593
WDR86	-1.121	0.0472226	0.0949109
TPT1-AS1	-0.421116	0.0470826	0.094723
DTHD1	-2.41317	0.0465822	0.0939945
TNFRSF13C	-1.94721	0.0457962	0.0926063
ZFYVE28	-1.28416	0.0443924	0.0905622
FMO1	-1.73475	0.0435368	0.0889058
TRAV4	-3.73387	0.0431729	0.0882512
ALG8	-0.470622	0.0388518	0.0801417
TRBV6-5	-3.24137	0.0386972	0.0799707
FXYD7	-2.54217	0.0384936	0.0796447
TRAV13-2	-3.69348	0.0377242	0.0781321
TCL1A	-2.25359	0.0363726	0.075563
PLEKHH2	-1.14474	0.0362532	0.075392
TRAV9-2	-4.29371	0.0361372	0.0752275
LTF	-0.405619	0.0360831	0.0751916
TTN	-1.28481	0.034288	0.071818
MMP2	-0.330148	0.0341312	0.0715631
EDARADD	-1.1143	0.0337433	0.0708228
LINC01281	-4.70934	0.0317956	0.0671497
IGHV1-2	-1.02615	0.0306175	0.0650663
PTK2B	-0.682907	0.0305754	0.0650446
IGLV3-21	-0.748718	0.0302974	0.064588
TRAV29DV5	-2.86262	0.0300393	0.0641048
IGLV3-19	-0.897619	0.0298806	0.0638331
CHI3L2	-1.03235	0.0298273	0.0637859
RPP21	-0.535926	0.0265149	0.0571219
CX3CL1	-0.233998	0.0243458	0.0528962
TRAV12-3	-2.39966	0.0228811	0.0499804
CCR8	-5.1344	0.0227403	0.0497262
RGMA	-0.596673	0.022643	0.0496199
LINC00926	-2.05091	0.0223819	0.0491534
IGLV7-46	-1.30314	0.0213235	0.0470317
TRAV14DV4	-3.87112	0.0209941	0.0464056
TRBV19	-3.98884	0.0208492	0.0461353
IGLV3-1	-0.328719	0.0204072	0.0453543
PRELP	-0.687027	0.0199871	0.0446153
BLK	-2.843	0.019117	0.0428137
IGHV3-23	-0.699238	0.0191011	0.0428137
STAG3	-1.82508	0.0188868	0.042438
NSMCE4A	-0.410665	0.0188058	0.0423027
ZNF267	-0.475757	0.018541	0.041753
MKI67	-0.536745	0.0173765	0.0396121
GAS1	-1.14963	0.0171008	0.039071
IGHG1	-0.114655	0.0164674	0.0377087
UTS2	-2.52117	0.0162441	0.0372809
TRAV3	-4.10385	0.0160966	0.0370257
GAL	-0.766917	0.0160538	0.0369914
SCGB1D2	-1.28617	0.0151085	0.0351097
SCGB2A1	-1.49597	0.014533	0.0339658
WNT2	-2.833	0.0142307	0.0333358
FGF7	-0.750316	0.0133703	0.0315377
MIAT	-2.39053	0.0129956	0.0307967
AC017002.1	-2.38128	0.0122301	0.0290839
IKZF2	-1.87567	0.0121836	0.0290072
CLECL1	-1.14299	0.012122	0.0288942
TSPAN2	-1.2266	0.0116445	0.0277887
TNFSF4	-2.47458	0.0112126	0.0268208
ANKRD49	-0.773112	0.0110515	0.0264665
CSF1	-0.664475	0.0107064	0.0257611
TCTN3	-0.577576	0.00990637	0.0239776
F2R	-0.766242	0.00986372	0.0239028
MFAP5	-1.59401	0.00954453	0.0231844
ZBED2	-3.58731	0.00918677	0.0223687
IRF4	-1.26791	0.00885582	0.0216146
CENPF	-0.477802	0.00817194	0.0201872
KRT5	-0.589013	0.00788745	0.0195317
CXCL14	-1.01388	0.00786352	0.0194962
EGR2	-0.401636	0.00763387	0.0189729
TRDC	-1.60081	0.00742025	0.0185552
MXRA5	-1.10811	0.00663964	0.0167678
IL12RB2	-2.07972	0.00638779	0.0162323
VPREB3	-2.19632	0.0063697	0.0162066
IGHV1-3	-0.966059	0.00619664	0.0157859
BICC1	-1.58869	0.00617207	0.0157595
TRAV12-2	-4.42474	0.00595052	0.0152351
LAYN	-1.00681	0.00587165	0.0150711
GPR25	-3.29759	0.00578419	0.0148653
TXK	-2.12406	0.00530076	0.0137093
CCR4	-3.8843	0.00500282	0.0130214
ADAM19	-1.27908	0.00489006	0.0127605
KRT14	-0.750479	0.00463168	0.0121641
GPR18	-2.28374	0.00427135	0.011394
GLYATL2	-1.15701	0.00373792	0.0100766
TRAV8-2	-3.73159	0.00296924	0.00816642
RMI2	-0.993601	0.00287296	0.00792089
TRBV9	-4.38941	0.00287201	0.00792089
HIST1H1E	-0.515039	0.00281856	0.00780467
COL8A1	-0.906744	0.00279025	0.00774732
S100A1	-0.805203	0.00260606	0.00725566
MFAP4	-0.903553	0.00244969	0.00683901
LTBP4	-0.648343	0.00242742	0.00678612
TRAV19	-4.08444	0.00226754	0.00640062
SAA1	-0.906926	0.00175171	0.00507822
IGHV6-1	-0.771036	0.00174027	0.00505225
FDCSP	-0.490684	0.00153201	0.00448743
EOMES	-3.03611	0.00151787	0.00446381
TNFSF8	-1.72054	0.00133675	0.00395973
LAIR2	-3.96489	0.00109731	0.00330815
BANK1	-2.18595	0.00106116	0.00321344
IGHV1-46	-0.950163	0.00101226	0.00306993
TNFRSF11B	-1.28911	0.00101193	0.00306993
IGHV4-39	-0.649278	0.000960883	0.00293156
TMSB15A	-0.690477	0.000877492	0.00268922
CDH11	-0.847306	0.000804539	0.00248056
MFAP2	-0.531335	0.000649171	0.00202864
DCN	-0.99005	0.000632948	0.00198453
IGLV1-51	-0.850758	0.000605717	0.00190796
TSHZ2	-0.614084	0.000575633	0.00182077
BTLA	-2.55231	0.000564561	0.00178939
TFF3	-0.647471	0.000551269	0.00175271
C1orf228	-2.00154	0.000526636	0.00167963
TMIGD2	-3.48031	0.000517739	0.00165644
CD70	-1.08074	0.000472199	0.00151312
FAAH2	-1.70915	0.000451932	0.00145274
PTGDS	-0.905011	0.000346709	0.00112694
MEG3	-1.21813	0.000332318	0.00108362
DLK1	-0.877113	0.000283731	0.000935452
GNG4	-1.33596	0.000262892	0.000871176
KLK6	-1.37871	0.000249103	0.000829529
AP3M2	-0.964324	0.000243792	0.000813172
CRABP1	-0.516649	0.000225461	0.000755741
UCHL1	-0.61681	0.000196942	0.000667833
CENPM	-0.883138	0.000187975	0.000639556
TNFSF14	-1.82526	0.000178114	0.000607016
TRAV13-1	-4.14386	0.000170541	0.000585123
PGM2L1	-0.666118	0.000120863	0.000419508
RSAD2	-0.940795	0.000116709	0.000405893
HPGD	-1.46805	0.00011298	0.00039427
TRGV10	-3.14191	0.000104156	0.000365793
PDGFRA	-2.18652	0.000102891	0.000362453
DPT	-2.43612	9.88606e-05	0.000349182
EFEMP1	-0.822337	8.14476e-05	0.000289686
SPON1	-2.54256	5.59684e-05	0.0002026
MMP7	-0.939908	5.1674e-05	0.000188057
CWF19L2	-0.777932	5.0342e-05	0.000183537
TRBV20-1	-2.90458	4.14002e-05	0.000151751
KLRG1	-2.15748	4.0263e-05	0.000148115
CD79B	-1.41791	3.71358e-05	0.000137605
SAA2	-1.34635	3.20302e-05	0.00011966
LUM	-1.09776	3.12966e-05	0.000117247
CCR6	-3.02321	2.7938e-05	0.000105051
TNIP3	-1.79179	2.79343e-05	0.000105051
BACH2	-2.08895	2.68621e-05	0.00010138
CISH	-1.03224	2.3335e-05	8.856e-05
TFAP2B	-0.723689	2.22649e-05	8.48147e-05
IGLV2-14	-0.512659	2.22064e-05	8.47501e-05
ZBP1	-1.46243	2.14525e-05	8.25369e-05
PLAC8	-1.14768	2.11286e-05	8.15533e-05
ADAM8	-1.10616	2.01383e-05	7.80263e-05
CD79A	-1.09035	1.74957e-05	6.81764e-05
TRBV7-9	-2.975	1.18277e-05	4.75442e-05
RTKN2	-1.39887	1.14456e-05	4.61904e-05
GNLY	-1.16423	1.09828e-05	4.44108e-05
CRABP2	-0.514666	9.6455e-06	3.94606e-05
SCGB2A2	-1.19365	9.59847e-06	3.93595e-05
PRDM1	-0.904447	8.27126e-06	3.41924e-05
CPNE7	-2.21609	7.20265e-06	2.98961e-05
PTGER2	-1.4635	5.23629e-06	2.22324e-05
C6orf15	-1.83012	4.73426e-06	2.02273e-05
KLRC1	-2.27677	3.76978e-06	1.63464e-05
KRT15	-0.839221	2.72046e-06	1.19489e-05
CHI3L1	-1.07536	1.69593e-06	7.62983e-06
PRSS21	-1.99375	1.48014e-06	6.70341e-06
TRG-AS1	-2.19157	1.2918e-06	5.88969e-06
GPR183	-0.655771	1.16962e-06	5.34458e-06
CLIC3	-1.18165	1.15583e-06	5.29343e-06
FABP7	-0.97754	1.11903e-06	5.14755e-06
KRT86	-2.45614	1.06939e-06	4.95321e-06
EED	-0.996128	5.80937e-07	2.74062e-06
PPP1R16B	-1.89545	5.74135e-07	2.71482e-06
HIST1H1D	-1.23376	5.14988e-07	2.44649e-06
TRAF5	-1.28104	2.76816e-07	1.34003e-06
LEF1	-1.89264	2.24347e-07	1.10707e-06
GPX7	-0.93025	8.39057e-08	4.26433e-07
NCR3	-2.78951	8.36717e-08	4.26307e-07
MAL	-3.4954	7.55317e-08	3.87742e-07
MUCL1	-1.01607	7.46751e-08	3.84313e-07
BAMBI	-0.668861	7.05465e-08	3.64908e-07
FBLN7	-2.16361	5.66725e-08	2.9615e-07
AC133644.2	-2.0415	3.71114e-08	1.95941e-07
MT1F	-0.757515	3.48853e-08	1.85146e-07
CRTAM	-2.00586	3.23432e-08	1.72554e-07
HAPLN3	-0.791751	3.13241e-08	1.67555e-07
FBLN5	-1.02822	1.58246e-08	8.81163e-08
IGLV3-25	-0.829718	1.00561e-08	5.6771e-08
PEG10	-0.941364	7.32019e-09	4.20241e-08
CLDN4	-0.59128	5.4663e-09	3.17388e-08
TNF	-0.989481	5.32164e-09	3.09872e-08
AARD	-1.16463	3.39164e-09	2.02703e-08
WFDC2	-1.2489	2.13783e-09	1.30057e-08
NELL2	-3.10428	2.08153e-09	1.27011e-08
PASK	-2.28222	2.06246e-09	1.26225e-08
MIR155HG	-1.36022	1.71658e-09	1.06658e-08
CCL4L2	-0.853082	1.66081e-09	1.03508e-08
SFRP2	-1.99681	1.34135e-09	8.4634e-09
ISLR	-1.14892	7.78238e-10	5.03508e-09
SPON2	-1.04511	6.29545e-10	4.11222e-09
MATK	-2.23824	2.81066e-10	1.88425e-09
THEMIS	-3.47175	1.5334e-10	1.04868e-09
PDE3B	-2.29131	1.44396e-10	9.94184e-10
LTA	-4.01726	1.09638e-10	7.60007e-10
TBC1D4	-1.09897	1.06006e-10	7.37341e-10
ZG16B	-0.913737	1.00449e-10	7.01081e-10
MS4A1	-3.02145	9.95699e-11	6.97332e-10
CD40LG	-3.6919	5.54479e-11	3.97897e-10
GPR171	-3.29872	4.88575e-11	3.56887e-10
IGLV1-40	-0.516266	4.10098e-11	3.00795e-10
FOXP3	-4.55857	2.88997e-11	2.14173e-10
PLEKHF1	-1.64948	1.58341e-11	1.20861e-10
XCL2	-2.18133	1.24365e-11	9.63714e-11
TCF7	-1.92786	2.85023e-12	2.30506e-11
JAKMIP1	-3.03419	2.78789e-12	2.26363e-11
TNFRSF25	-2.7192	1.70901e-12	1.41011e-11
SERPINE2	-1.0585	1.7037e-12	1.41011e-11
CRIP1	-0.844988	1.49866e-12	1.24664e-11
FASLG	-3.02331	1.3859e-12	1.15757e-11
SAMD3	-2.86922	7.83734e-13	6.60021e-12
LINC00861	-3.2537	7.52632e-13	6.36458e-12
HOPX	-1.33528	3.17844e-13	2.78011e-12
TNFRSF9	-3.25208	5.3111e-14	4.78939e-13
SLAMF1	-3.14222	4.46524e-14	4.06257e-13
CALML5	-1.15078	1.28468e-14	1.22345e-13
XCL1	-2.16593	1.00095e-14	9.66795e-14
LY9	-2.65755	8.60282e-15	8.34883e-14
TNFRSF4	-1.9006	5.40327e-15	5.26884e-14
AZGP1	-0.965582	2.56958e-18	2.7708e-17
TOX	-3.31591	5.30764e-19	5.87879e-18
KLRD1	-2.26815	3.77278e-19	4.29549e-18
AREG	-0.980918	2.07123e-19	2.39839e-18
CTLA4	-3.03552	6.55212e-21	8.34576e-20
SCML4	-3.42226	1.51097e-21	1.94896e-20
HLA-DQA2	-1.20902	2.73181e-22	3.63884e-21
P2RY10	-2.99094	2.03623e-22	2.73016e-21
IGKV4-1	-0.982403	2.66147e-23	3.79306e-22
[truncated: 39 more rows]

## Sheet: 6. scAB Differential Genes
Gene	logfoldchanges	pvals	pvals_adj
MDK	2.91246	0	0
AZGP1	3.59237	0	0
TM4SF1	2.84556	0	0
CLDN4	3.20267	0	0
CRIP2	2.71046	0	0
MGP	2.46738	0	0
MUCL1	3.55059	0	0
CALD1	2.10342	0	0
IGHG1	2.84757	3.48369e-285	5.07125e-283
APOD	2.62976	5.4713e-276	7.43367e-274
CRABP2	2.51163	9.20219e-275	1.17213e-272
SLPI	2.42621	4.32621e-271	5.18637e-269
IGKV4-1	1.91996	5.09438e-271	5.76797e-269
FXYD3	2.26589	8.89272e-265	9.53861e-263
SFN	2.59221	3.86937e-233	3.75513e-231
HMGB3	2.08432	7.17539e-231	6.64702e-229
MYC	1.73595	9.09464e-223	8.05864e-221
HILPDA	2.20657	9.07688e-222	7.70778e-220
TFF3	3.4344	4.52561e-217	3.68927e-215
BAMBI	2.63028	2.16485e-211	1.69691e-209
CYR61	1.99398	4.7585e-206	3.59179e-204
EFNA1	2.14697	1.31271e-204	9.55462e-203
IGFBP5	2.18133	1.20487e-202	8.4673e-201
FBLIM1	2.31615	1.26723e-201	8.60872e-200
FABP7	3.29535	2.49604e-199	1.64095e-197
PALLD	1.9575	2.25691e-190	1.39382e-188
COL1A1	2.68976	9.8599e-189	5.91014e-187
MFAP2	2.92015	3.29694e-177	1.81599e-175
TFAP2B	3.19735	8.72755e-168	4.5607e-166
EGLN3	2.34394	2.67377e-166	1.36228e-164
NSMCE4A	1.59325	7.6345e-166	3.79491e-164
MESP1	2.41287	6.07856e-159	2.81548e-157
TMC5	2.90333	1.98044e-155	8.96919e-154
FHL2	2.17301	2.13296e-153	9.24889e-152
HES4	1.66019	5.15308e-152	2.18791e-150
TMSB15A	3.46235	2.43762e-151	1.01385e-149
BCAM	1.91461	7.32685e-150	2.98642e-148
CALML5	1.91919	2.13702e-141	8.37546e-140
MFGE8	1.51725	2.33784e-141	8.98966e-140
ZG16B	2.22905	1.06045e-140	4.00223e-139
MEST	2.75986	1.61949e-140	6.00094e-139
IGHV6-1	2.32511	8.81834e-140	3.20925e-138
COPS8	1.20268	1.28001e-138	4.5766e-137
CENPW	1.77718	5.86421e-136	2.06056e-134
IGHG4	2.75362	1.7441e-135	6.02453e-134
CSRP2	2.02051	6.36985e-133	2.16362e-131
ERRFI1	1.57221	9.1716e-133	3.06422e-131
KCNQ1OT1	1.59656	6.18005e-130	1.96796e-128
FBLN1	2.31696	1.18663e-127	3.72053e-126
CRABP1	2.93585	8.33936e-125	2.56581e-123
CERCAM	2.32744	8.43521e-125	2.56581e-123
PKIG	1.54525	2.02526e-121	5.98184e-120
COL1A2	2.35412	1.57282e-119	4.57915e-118
PEG10	2.26542	4.8724e-116	1.39858e-114
MYO1B	2.04925	2.73167e-115	7.73215e-114
TMEM45A	1.74876	1.99108e-113	5.55866e-112
COL6A1	2.13595	5.40871e-113	1.48959e-111
TYMS	1.8915	1.61883e-111	4.34103e-110
GSN	0.973989	7.89202e-109	2.08882e-107
DERL3	2.18516	1.0666e-107	2.78682e-106
COL3A1	2.51276	1.08766e-105	2.73661e-104
PDLIM3	2.32137	7.46428e-104	1.84485e-102
COL6A2	1.9872	7.51337e-104	1.84485e-102
HES1	1.27587	2.45766e-103	5.89261e-102
S100A14	1.53033	2.67572e-100	6.26794e-99
CTSF	1.66646	1.35657e-98	3.14169e-97
IGLV1-40	1.17005	1.83997e-97	4.12073e-96
KDELR3	1.76289	4.13686e-97	9.06551e-96
SPARC	1.53273	8.64106e-96	1.87345e-94
HIST1H1C	1.21281	6.0772e-95	1.30372e-93
TPBG	1.64533	3.56356e-92	7.48716e-91
COL6A3	2.35896	5.20166e-91	1.07081e-89
LINC01285	2.99289	8.0893e-90	1.6486e-88
TPM2	1.45427	4.43327e-89	8.85784e-88
PCOLCE	2.00178	4.24418e-87	8.39771e-86
NNMT	1.46148	1.62065e-86	3.17585e-85
C1S	1.45812	1.96537e-86	3.81469e-85
RBFOX2	1.82089	5.04385e-86	9.69751e-85
AK1	1.4646	7.02864e-86	1.33873e-84
FERMT2	1.71475	1.29295e-85	2.43984e-84
LUM	2.33964	1.80387e-84	3.37274e-83
FKBP10	1.80622	5.11531e-83	9.30804e-82
RBPMS	1.7612	3.41766e-82	6.16389e-81
DTWD1	1.25862	3.57225e-81	6.33065e-80
EDN1	2.21343	4.13907e-81	7.27192e-80
IGKV3D-11	2.83005	1.84135e-78	3.20742e-77
NR2F2	1.7844	2.76547e-78	4.77629e-77
CTSK	2.10702	7.86328e-78	1.33545e-76
CLU	1.37814	6.82091e-77	1.14884e-75
PPFIBP1	1.29934	1.59822e-76	2.66981e-75
CRYAB	1.41743	1.86249e-75	3.08598e-74
FSTL1	1.96314	6.80058e-75	1.11771e-73
MZB1	1.65582	1.51941e-72	2.45758e-71
CNFN	2.21629	4.88055e-72	7.77075e-71
COL5A2	2.53538	2.97978e-71	4.7076e-70
POSTN	2.00105	1.32698e-70	2.06442e-69
RND3	1.45226	1.9283e-70	2.97718e-69
CTHRC1	1.95216	3.57072e-70	5.47152e-69
PTK2	1.31498	4.89153e-70	7.4395e-69
IGHV1-46	1.67734	1.06244e-69	1.60389e-68
IGHV3-21	1.54477	2.11354e-69	3.16721e-68
UGDH	1.45681	1.38757e-68	2.06414e-67
IGLV3-1	1.16061	1.86048e-68	2.74758e-67
IGKV1-8	2.55226	2.1751e-68	3.18911e-67
PLPP3	1.41493	4.61174e-68	6.71337e-67
EGR1	0.787886	1.19541e-66	1.72783e-65
MYL9	1.28564	1.74072e-66	2.49831e-65
P4HA2	1.73979	4.43356e-66	6.3186e-65
FKBP9	1.55766	4.82907e-66	6.83447e-65
GABRP	2.76236	1.04171e-64	1.44423e-63
DCN	1.92877	1.69119e-64	2.32882e-63
RCAN1	1.48338	1.59845e-63	2.17176e-62
GPM6B	1.7535	1.03164e-62	1.38322e-61
SERPINE2	1.25623	2.52984e-62	3.36981e-61
GPX7	1.22292	9.06071e-61	1.19134e-59
ISLR	1.81982	2.19873e-59	2.85415e-58
CCDC80	1.96624	3.10235e-59	4.00164e-58
EFEMP2	1.97738	5.14836e-59	6.59897e-58
TDO2	2.82959	5.20212e-59	6.6262e-58
MAP1B	1.40522	5.56792e-59	7.04809e-58
CLEC11A	1.48226	1.0179e-58	1.27269e-57
THY1	2.02074	2.183e-57	2.66404e-56
PRSS23	1.37422	1.81209e-56	2.18523e-55
CYP27A1	1.57373	3.85036e-56	4.5889e-55
IGHV4-39	1.29566	7.84734e-56	9.19131e-55
SRPX	2.00128	1.47169e-54	1.69452e-53
COL5A1	2.94019	1.62129e-54	1.85629e-53
BGN	1.61087	5.32788e-54	6.06605e-53
EMP1	0.972497	6.16349e-54	6.97844e-53
RCN3	2.1558	5.10049e-53	5.74298e-52
IFT27	0.935007	1.40034e-52	1.56807e-51
TRIP10	1.45349	3.91633e-52	4.33776e-51
BIRC5	1.5603	7.99272e-52	8.80495e-51
DLK1	2.67187	1.24002e-51	1.35868e-50
GPC1	2.02272	1.4685e-51	1.60043e-50
CENPF	1.29504	2.14951e-51	2.33016e-50
PXDN	1.63734	3.12956e-51	3.37462e-50
KRT15	1.63561	3.46419e-51	3.69634e-50
C1R	1.3443	4.03091e-51	4.27864e-50
RRM2	1.87525	8.92697e-51	9.37792e-50
SOD3	1.44358	1.0885e-50	1.13763e-49
FBLN5	1.35877	1.68732e-50	1.75447e-49
SFRP2	2.37861	3.12961e-50	3.23763e-49
SDC2	1.32449	7.51138e-50	7.73141e-49
MCM3	1.07868	2.41097e-49	2.46912e-48
NOTCH3	1.42871	6.23493e-49	6.32178e-48
HIST1H1E	1.07753	6.6972e-49	6.75688e-48
UBE2C	1.50822	2.26076e-48	2.25855e-47
CREB3L1	2.69849	7.58333e-48	7.50234e-47
CDC20	1.72918	8.28518e-48	8.1571e-47
RERG	2.04297	1.07463e-47	1.04789e-46
NREP	1.64384	2.30114e-47	2.22262e-46
SGCE	1.39381	4.48017e-47	4.30688e-46
LTF	2.25651	1.5647e-46	1.49711e-45
GPRC5C	2.00239	1.83081e-46	1.73543e-45
SGCB	1.31419	3.0745e-46	2.90085e-45
MALL	1.61959	3.35078e-46	3.14696e-45
RNF39	2.80827	4.13269e-46	3.8635e-45
LURAP1L	1.87013	1.69594e-45	1.57106e-44
S100A1	2.28428	4.55407e-45	4.16197e-44
ANGPTL4	1.42126	5.33055e-45	4.84985e-44
MSRB2	1.07304	6.98805e-44	6.27385e-43
IGKV1-27	2.60222	8.93383e-44	7.98559e-43
ADAM12	2.45279	9.05174e-44	8.05565e-43
CX3CL1	1.81154	9.31992e-44	8.25826e-43
RARRES2	1.80204	4.10608e-43	3.62259e-42
ALG8	1.03521	7.02517e-43	6.17125e-42
CTGF	1.46332	9.23546e-43	8.04353e-42
SNX7	1.66777	9.32272e-43	8.08498e-42
LMCD1	1.07391	1.01923e-42	8.80168e-42
LTBP1	2.03605	4.96618e-41	4.25256e-40
IGKV1-12	2.42417	1.00428e-40	8.52797e-40
AGR2	1.68868	1.12178e-40	9.48629e-40
TPT1-AS1	1.1949	1.19258e-40	1.00433e-39
FN1	0.969381	1.35098e-40	1.13305e-39
TCTN3	0.760485	5.9708e-40	4.98709e-39
P3H4	1.67684	1.0847e-39	9.02295e-39
MKI67	1.3597	3.03801e-39	2.51685e-38
LAMA4	1.37756	4.95696e-39	4.05714e-38
ITGA6	0.931162	6.66593e-39	5.43407e-38
MMP2	1.51308	7.78841e-39	6.29873e-38
IGHV3-23	1.18576	1.67932e-38	1.34742e-37
TMEM98	2.03252	2.24243e-38	1.79219e-37
RHOC	0.628808	4.03541e-38	3.21257e-37
MT1E	0.799615	4.62869e-38	3.67053e-37
MEG3	2.25194	7.85181e-38	6.20232e-37
SPON2	1.09666	1.29695e-37	1.02054e-36
TBX3	2.13313	3.31922e-37	2.59179e-36
FKBP7	1.63432	8.01127e-37	6.23167e-36
CCNB2	1.6042	1.69905e-36	1.31162e-35
COL4A2	1.1421	1.82586e-36	1.40419e-35
IGHV1-18	1.40462	2.06208e-36	1.57989e-35
CDKN3	1.33411	2.46817e-36	1.88395e-35
UCHL1	1.87122	5.04176e-36	3.81974e-35
MXRA5	2.62405	5.97731e-36	4.51177e-35
PGRMC2	1.05763	7.05821e-36	5.30799e-35
ITGB5	1.1909	1.08615e-35	8.13813e-35
IGLL5	1.78707	1.40991e-35	1.05253e-34
JSRP1	3.07683	1.60009e-35	1.19014e-34
FGFR1	1.31135	3.5805e-35	2.65347e-34
RAI14	1.56421	3.59711e-35	2.65613e-34
TIMP3	0.896479	3.75187e-35	2.7604e-34
IGHV3-30	1.19947	4.38089e-35	3.2116e-34
FBN1	1.92538	4.89958e-35	3.57897e-34
SLC39A13	1.08449	4.93027e-35	3.58853e-34
AEBP1	1.90015	5.72431e-35	4.15165e-34
LAMB1	1.50708	8.08748e-35	5.82413e-34
IGFBP6	1.72314	8.64681e-35	6.205e-34
PTN	1.83888	1.0347e-34	7.39904e-34
PRRX1	1.59931	1.87674e-34	1.33268e-33
CCNB1	1.46884	3.54476e-34	2.50841e-33
IGKV1-17	2.20657	5.09343e-34	3.57945e-33
TGFB1I1	1.42409	6.50243e-34	4.55394e-33
VCAN	1.03067	8.18878e-34	5.69582e-33
CAMK2N1	2.01758	1.79429e-32	1.223e-31
AARD	1.40341	2.0816e-32	1.4141e-31
IGLV2-23	1.04271	2.39627e-32	1.62246e-31
PHLDB1	1.33242	2.95799e-32	1.99615e-31
PDLIM4	1.48325	2.99629e-32	2.01533e-31
TAGLN	1.06686	3.14578e-32	2.10891e-31
INAFM1	1.10017	3.57571e-32	2.38928e-31
MTUS1	1.21659	4.53098e-32	3.00786e-31
TFPI	1.17341	5.30662e-32	3.51133e-31
GNAI1	1.81178	5.32781e-32	3.51394e-31
VASN	1.27378	8.50827e-32	5.57552e-31
MXRA8	1.88504	1.15402e-31	7.53809e-31
SLC12A2	1.20446	1.81858e-31	1.18411e-30
JCHAIN	0.760386	2.2436e-31	1.44698e-30
OBSL1	2.13431	2.3426e-31	1.50606e-30
CENPM	1.06344	2.40171e-31	1.53921e-30
COL12A1	2.39499	3.75791e-31	2.39332e-30
IGHV1-3	1.28664	4.39647e-31	2.79128e-30
PDGFRB	1.64041	9.72688e-31	6.15633e-30
LOXL1	1.70949	1.36729e-30	8.62705e-30
RND1	1.75993	1.55113e-30	9.75679e-30
IGKV1D-39	2.94239	2.01862e-30	1.26583e-29
MAFF	0.696578	2.42653e-30	1.51695e-29
RPP21	0.783818	2.83429e-30	1.76645e-29
MMP14	0.951589	3.79197e-30	2.34894e-29
RARRES1	0.749813	4.03167e-30	2.48986e-29
YAP1	1.25757	4.72128e-30	2.90694e-29
PLOD2	1.43535	6.15785e-30	3.78003e-29
GULP1	2.02004	7.92165e-30	4.84814e-29
ST5	1.61422	8.62254e-30	5.2613e-29
ZNF667-AS1	1.47002	1.07017e-29	6.51046e-29
IGLV3-25	0.595772	2.00774e-29	1.21779e-28
SMTN	1.46768	3.00944e-29	1.81995e-28
OLFML3	1.46936	4.07844e-29	2.45913e-28
MTRNR2L8	0.706369	5.33259e-29	3.20584e-28
LTBP4	0.788762	9.018e-29	5.4055e-28
PHLDA3	1.24998	1.15543e-28	6.90549e-28
HTRA1	1.33626	1.23518e-28	7.36055e-28
DEFB1	1.53185	2.15259e-28	1.279e-27
IGHG3	0.916788	2.2514e-28	1.33382e-27
NMD3	0.720399	2.7175e-28	1.6053e-27
FBXO32	0.711345	4.03905e-28	2.37221e-27
CAV2	0.779835	4.25674e-28	2.49288e-27
PCSK1N	2.04426	6.27635e-28	3.6651e-27
TDP2	0.768213	8.4986e-28	4.93451e-27
STEAP1	1.63439	1.08428e-27	6.27774e-27
NSRP1	0.509911	1.52561e-27	8.73713e-27
CBWD1	0.977204	1.52621e-27	8.73713e-27
KCNS3	1.50245	2.74656e-27	1.56354e-26
TTYH1	2.77431	2.92627e-27	1.66121e-26
NUSAP1	1.08685	5.74712e-27	3.25351e-26
AGRN	1.19452	5.79721e-27	3.27277e-26
FRMD6	1.69016	6.11745e-27	3.43453e-26
EFEMP1	1.06679	7.27461e-27	4.07298e-26
P3H1	1.05213	1.43527e-26	8.01394e-26
FRZB	1.63714	2.07904e-26	1.15452e-25
RGMA	1.84944	4.57048e-26	2.53115e-25
FAP	2.18904	1.71333e-25	9.3613e-25
EPS8	0.76294	1.78345e-25	9.71836e-25
ANTXR1	1.75996	2.18031e-25	1.18493e-24
SMIM8	0.857422	3.86631e-25	2.09006e-24
SLC9A3R2	1.12656	9.27308e-25	4.99961e-24
HNRNPH1	0.347109	3.26022e-24	1.74392e-23
GLT8D2	1.77528	4.58098e-24	2.44399e-23
THBS2	2.71232	1.02845e-23	5.45829e-23
EMILIN1	1.88267	1.33552e-23	7.0696e-23
HSPG2	0.945937	1.96375e-23	1.03414e-22
TUBB6	0.809612	2.2131e-23	1.16245e-22
TNFAIP6	1.17262	2.50126e-23	1.30707e-22
LAMC1	1.03888	3.30124e-23	1.7207e-22
GRB10	1.74906	3.67495e-23	1.90987e-22
ACTA2	0.526819	6.97883e-23	3.60072e-22
NID1	1.56282	1.02441e-22	5.27208e-22
TCEAL1	0.98253	1.09509e-22	5.62163e-22
PDGFRL	2.07876	1.55917e-22	7.96387e-22
GAL	2.18482	1.75376e-22	8.93542e-22
COL16A1	1.94711	1.95588e-22	9.94035e-22
PLK1	1.57662	2.19167e-22	1.10834e-21
COL27A1	2.12143	2.30373e-22	1.16213e-21
MFAP4	1.68114	2.57398e-22	1.29525e-21
CEBPD	0.484279	3.3934e-22	1.70339e-21
MMP11	2.21204	5.66265e-22	2.82855e-21
DPT	2.43726	7.74122e-22	3.85736e-21
C2orf76	0.92955	9.35709e-22	4.65116e-21
MAP1A	1.4754	2.18285e-21	1.0824e-20
STK38L	0.717681	2.3931e-21	1.18377e-20
COL18A1	0.845173	3.42074e-21	1.68801e-20
CTNNB1	0.383789	3.47774e-21	1.71199e-20
CDH11	1.53726	7.10712e-21	3.4902e-20
CDK1	1.12756	7.33717e-21	3.59451e-20
ADAMTS12	2.26071	8.87723e-21	4.33856e-20
IGLV1-44	0.782836	1.43994e-20	7.00383e-20
CYP1B1	1.4293	1.81557e-20	8.78892e-20
PHLDB2	1.4699	1.92536e-20	9.29831e-20
SNAI2	1.75231	1.96293e-20	9.45733e-20
RALGPS2	0.624076	3.22923e-20	1.54851e-19
PDGFRA	2.21706	4.75072e-20	2.26744e-19
GGT5	1.39736	5.04299e-20	2.40131e-19
IGHV1-2	1.22102	6.43819e-20	3.05852e-19
CRISP3	2.82332	7.27402e-20	3.44755e-19
IGFBP7	0.57546	7.36921e-20	3.4765e-19
PFKM	1.59149	9.68176e-20	4.55691e-19
LOXL2	1.72076	1.09019e-19	5.11936e-19
SPRYD7	0.785532	1.32372e-19	6.20169e-19
SUCLA2	0.663992	1.63158e-19	7.6265e-19
MAGEH1	0.59459	2.82721e-19	1.3185e-18
DKK1	1.95515	2.84151e-19	1.32215e-18
FDCSP	1.50708	5.59204e-19	2.57259e-18
IGLV2-14	0.466482	5.63166e-19	2.58498e-18
FAM110B	1.66336	5.68933e-19	2.60558e-18
CD248	1.63767	6.30065e-19	2.87909e-18
MRC2	1.3412	7.67588e-19	3.49965e-18
WFDC2	0.893308	1.1972e-18	5.44619e-18
NDUFA13	0.301565	1.40097e-18	6.34486e-18
KANK2	1.28072	2.4906e-18	1.12297e-17
IGKV1-39	2.5675	2.54198e-18	1.14361e-17
SUSD2	1.85948	2.60851e-18	1.17096e-17
LAMB2	1.11668	2.68789e-18	1.20394e-17
CPE	0.892513	2.90429e-18	1.29801e-17
ING1	0.766863	3.05624e-18	1.36294e-17
TRMT11	0.790224	3.24845e-18	1.44549e-17
LOX	1.93615	3.38318e-18	1.50216e-17
DCLK1	2.15213	4.62911e-18	2.0509e-17
ZNF703	1.29669	4.86734e-18	2.15176e-17
HOXB2	0.581352	5.89969e-18	2.6025e-17
CXCL12	1.09475	6.14348e-18	2.70419e-17
OAF	1.3681	6.29845e-18	2.76643e-17
MEIS2	1.59477	7.0555e-18	3.09228e-17
IGKV1-16	1.13872	7.34762e-18	3.2134e-17
IGFBP4	0.591007	8.85261e-18	3.8633e-17
CITED4	1.80517	9.88217e-18	4.30339e-17
SMARCA1	1.21774	1.3687e-17	5.94757e-17
COL4A1	1.00727	1.50406e-17	6.52185e-17
LRG1	1.79407	2.01299e-17	8.71015e-17
LINC01116	1.72178	2.30137e-17	9.93684e-17
CD79A	0.241468	2.47721e-17	1.06509e-16
PLAU	0.830659	2.88436e-17	1.23754e-16
SERPINE1	1.42406	5.12723e-17	2.1679e-16
INSIG2	0.584787	6.01892e-17	2.53966e-16
KLHL42	0.813859	6.55576e-17	2.76046e-16
TGFB3	2.0614	7.69388e-17	3.23302e-16
DPYSL3	1.36011	7.97211e-17	3.34304e-16
NBL1	0.927238	8.51417e-17	3.56302e-16
TNC	1.4754	1.23097e-16	5.13029e-16
CFL2	0.877833	1.29677e-16	5.39352e-16
F3	1.51777	1.44819e-16	5.99881e-16
RPF1	0.468027	2.18641e-16	9.02003e-16
BAG3	0.352881	2.41461e-16	9.94136e-16
AP000769.1	0.809528	2.69884e-16	1.10892e-15
STXBP1	1.67706	2.73825e-16	1.12059e-15
FGF7	1.6029	3.97474e-16	1.6201e-15
FBLN2	1.66491	4.35478e-16	1.77147e-15
BMP1	1.5561	5.21588e-16	2.10912e-15
EHD2	1.04808	5.63131e-16	2.2726e-15
UBE2M	0.951355	5.77205e-16	2.3202e-15
DDR2	1.16761	7.41242e-16	2.96788e-15
IGKV3D-15	2.9147	7.68288e-16	3.07014e-15
C5orf38	2.0141	8.03565e-16	3.20482e-15
GPRC5A	1.15504	8.13819e-16	3.23938e-15
IGLV1-47	0.813767	8.8275e-16	3.50691e-15
CYP4Z1	2.41495	8.96353e-16	3.55402e-15
INSR	1.05786	1.07528e-15	4.24695e-15
GNG4	1.36276	1.15642e-15	4.55856e-15
PLAT	1.46909	1.22255e-15	4.80067e-15
CNKSR3	1.45437	1.33328e-15	5.22543e-15
IGHV3-48	1.75855	1.48873e-15	5.80122e-15
CRYZL1	0.497942	1.50641e-15	5.85888e-15
TMEM119	1.93243	1.82767e-15	7.09483e-15
PRAF2	0.932478	1.83296e-15	7.10184e-15
FAM3D	2.41674	2.84503e-15	1.08988e-14
TCTEX1D2	1.28987	3.70263e-15	1.41575e-14
RNASE4	1.36509	3.90587e-15	1.49067e-14
PIGK	0.724458	4.97604e-15	1.89201e-14
IGHV3-7	1.05239	5.28889e-15	2.00722e-14
ANGPTL2	1.77274	5.37168e-15	2.03485e-14
PLS3	0.901205	6.47804e-15	2.43584e-14
FJX1	1.8778	6.91234e-15	2.59436e-14
CCNA2	1.23918	1.20676e-14	4.52092e-14
IGHV3-73	2.4316	1.54704e-14	5.78509e-14
PGM2L1	0.472116	1.59571e-14	5.95615e-14
C12orf29	0.755132	1.73121e-14	6.4501e-14
SNHG9	0.40141	1.91581e-14	7.11187e-14
NR2F1	1.85456	1.95896e-14	7.25885e-14
IGLV3-21	0.585272	2.85481e-14	1.05592e-13
RUNX1T1	1.91358	3.28367e-14	1.21015e-13
RMI2	1.16538	3.94848e-14	1.44991e-13
LRRC17	2.25808	5.07735e-14	1.85775e-13
SNAPC3	0.641362	5.18795e-14	1.89481e-13
NMB	0.432012	5.93751e-14	2.1647e-13
EGFL7	0.798685	6.21429e-14	2.26156e-13
PTP4A3	0.540088	6.38095e-14	2.31807e-13
KRT23	2.44081	6.47572e-14	2.34831e-13
COMMD10	0.404858	6.89983e-14	2.49324e-13
TINAGL1	0.646755	7.1283e-14	2.57123e-13
ZNF354A	1.09727	7.24703e-14	2.60944e-13
OSMR	1.05328	7.48963e-14	2.69204e-13
DKK3	1.15308	9.67889e-14	3.45457e-13
MAGI1	1.4316	1.0227e-13	3.64381e-13
KRT5	0.867233	1.39795e-13	4.97213e-13
COX7A1	1.02896	1.40542e-13	4.98998e-13
FBXO3	0.545281	1.42997e-13	5.0683e-13
ZNF503	1.01829	1.52916e-13	5.41048e-13
SNTA1	1.64234	1.86976e-13	6.60411e-13
UBE2E2	0.471018	1.8776e-13	6.62032e-13
TNFRSF17	1.51102	2.1218e-13	7.46844e-13
GJA1	1.46919	2.84897e-13	9.99346e-13
GNG11	0.572431	2.96324e-13	1.03764e-12
TMEM80	0.522345	3.02091e-13	1.05602e-12
SORBS2	1.09753	3.0311e-13	1.05777e-12
CRISPLD2	0.924998	3.31113e-13	1.15352e-12
WNT2	3.12373	3.89368e-13	1.34954e-12
FAM89B	0.87796	4.28333e-13	1.48208e-12
LAMA5	1.10052	4.40219e-13	1.52062e-12
ECM1	1.16033	4.51586e-13	1.55725e-12
COL14A1	1.75095	4.97234e-13	1.71176e-12
PDS5B	0.427842	6.17624e-13	2.12263e-12
ANO1	1.22538	6.52212e-13	2.23772e-12
CLN5	0.430157	6.68906e-13	2.29115e-12
INTS6	0.260088	6.72768e-13	2.3005e-12
DLC1	1.00849	7.53758e-13	2.57313e-12
CTPS2	1.66006	7.68395e-13	2.61871e-12
PODXL	0.900394	8.45738e-13	2.87269e-12
FAM171A1	1.78296	9.07108e-13	3.07602e-12
SULF2	0.776914	9.38481e-13	3.17712e-12
CHAC1	1.92298	1.0807e-12	3.65253e-12
RASD1	0.699028	1.15937e-12	3.91192e-12
ADIRF	0.411536	1.28401e-12	4.32531e-12
MSRB3	1.18861	1.46505e-12	4.92703e-12
PLAGL1	0.702742	1.66495e-12	5.59007e-12
CEBPB	0.261727	1.94676e-12	6.51476e-12
RAMP1	1.27616	2.62537e-12	8.74266e-12
ASPM	0.97758	2.66084e-12	8.84631e-12
LXN	0.701158	2.927e-12	9.71534e-12
GPRC5B	1.529	3.31682e-12	1.09735e-11
SULF1	1.95018	3.45045e-12	1.13971e-11
PCDH18	2.17934	3.46961e-12	1.14418e-11
S100A8	0.340559	3.51262e-12	1.1565e-11
FILIP1L	0.751065	3.68671e-12	1.21186e-11
OLFM1	1.82331	3.73926e-12	1.22715e-11
GAS1	1.87586	3.89451e-12	1.274e-11
HOXC9	1.62537	4.09182e-12	1.3364e-11
AMOTL1	1.5064	4.87543e-12	1.58978e-11
DDX19A	0.582371	5.2174e-12	1.69857e-11
CRIM1	0.670688	5.47493e-12	1.77957e-11
CETN3	0.816004	5.81704e-12	1.88476e-11
POU2AF1	0.633189	6.30139e-12	2.03845e-11
B3GALNT1	1.199	7.66332e-12	2.47118e-11
CIART	2.14629	7.78466e-12	2.50408e-11
MPDZ	1.34525	7.78992e-12	2.50408e-11
PLEKHH3	1.52078	8.3343e-12	2.67485e-11
IGKV1-6	1.17216	8.50007e-12	2.72376e-11
TWIST2	2.07684	8.65538e-12	2.76918e-11
SCG5	2.27251	9.48837e-12	3.02618e-11
BICC1	1.98105	9.75829e-12	3.10741e-11
MBIP	0.544362	9.77524e-12	3.10795e-11
IGHV3-74	1.19165	1.17567e-11	3.7263e-11
C9orf3	0.849782	1.21985e-11	3.86035e-11
CCDC74A	2.13014	1.29027e-11	4.07686e-11
SPC25	1.4057	1.38225e-11	4.36072e-11
PCED1A	0.654792	1.46594e-11	4.61759e-11
SEMA5A	1.89918	1.54125e-11	4.84731e-11
NOSTRIN	1.44976	1.66933e-11	5.24204e-11
DNAJB4	0.298972	1.91183e-11	5.99433e-11
FIBIN	1.89412	1.99806e-11	6.25505e-11
IGLV4-69	1.42796	2.11912e-11	6.62386e-11
SPTSSB	1.48809	2.46571e-11	7.68367e-11
IGF2	1.52248	2.77064e-11	8.6207e-11
PRTFDC1	1.2876	2.87633e-11	8.93591e-11
L3HYPDH	0.882627	3.53678e-11	1.0971e-10
H6PD	0.70131	3.92022e-11	1.21419e-10
COL8A1	1.24559	4.09983e-11	1.2679e-10
VWA1	1.0431	4.92202e-11	1.51986e-10
NPEPL1	1.04164	5.07121e-11	1.5612e-10
FAM234A	0.82276	5.35163e-11	1.64504e-10
GSKIP	0.459373	5.64045e-11	1.73121e-10
NDUFAF1	0.620137	5.90371e-11	1.80929e-10
ID4	1.62078	7.35367e-11	2.25027e-10
IGKV3D-20	2.89793	7.62768e-11	2.33062e-10
SPARCL1	0.299484	9.55546e-11	2.91091e-10
PLAC9	0.930657	9.59174e-11	2.91761e-10
PTGDS	0.77084	9.86519e-11	2.99631e-10
SEC23A	0.32009	1.37875e-10	4.17517e-10
MYLK	0.717658	1.44584e-10	4.37183e-10
LGMN	0.156675	1.56174e-10	4.71531e-10
SERPINF1	0.622748	1.74446e-10	5.25142e-10
IGF1	1.02965	1.79972e-10	5.40977e-10
GLYATL2	1.55052	1.83298e-10	5.50165e-10
MFAP5	1.9557	2.12524e-10	6.36948e-10
CFH	0.812896	2.17547e-10	6.51043e-10
PDPN	1.83834	2.47025e-10	7.38177e-10
PLSCR4	1.23328	2.65298e-10	7.9162e-10
SEPT8	0.903296	3.01433e-10	8.95509e-10
NDUFC2	0.243446	3.20241e-10	9.4862e-10
F2R	0.432729	3.55015e-10	1.0501e-09
BCAR1	0.886836	3.66345e-10	1.08205e-09
RAB23	1.54236	4.24453e-10	1.25005e-09
TTC32	0.575641	4.96219e-10	1.4572e-09
LYNX1	1.65955	5.39753e-10	1.58276e-09
SOX13	1.74913	5.47718e-10	1.60381e-09
SMAD4	0.628547	6.56016e-10	1.91816e-09
CBWD5	0.526311	7.10138e-10	2.07344e-09
TWSG1	0.75975	8.19745e-10	2.38663e-09
TOP2A	0.772262	9.21169e-10	2.67809e-09
DVL2	0.615553	1.14906e-09	3.33587e-09
TMEM242	0.342501	1.15547e-09	3.34973e-09
DMPK	1.35082	1.19495e-09	3.45924e-09
PLEKHH2	1.83306	1.22531e-09	3.5421e-09
MSX2	2.7262	1.27953e-09	3.68837e-09
NXN	1.5989	1.56134e-09	4.48803e-09
COL15A1	0.901145	1.57247e-09	4.51366e-09
CPXM1	1.96649	1.63168e-09	4.67702e-09
HTRA3	2.03214	1.64265e-09	4.70184e-09
ACAP3	0.974059	1.66535e-09	4.76014e-09
TFF1	2.1699	1.72662e-09	4.92836e-09
SLIT2	1.86719	1.75272e-09	4.99585e-09
WDR11	0.440752	1.85177e-09	5.26348e-09
FHL1	0.780378	1.93897e-09	5.50366e-09
CDKN2A	0.581286	2.06917e-09	5.86505e-09
AC017002.2	0.737479	2.08876e-09	5.91234e-09
IGKV1D-13	3.07516	2.18497e-09	6.16754e-09
EGFLAM	1.44307	2.3522e-09	6.6304e-09
DCTN6	0.269678	2.44945e-09	6.89501e-09
ST20	1.1506	2.46387e-09	6.92603e-09
PLXDC1	0.950036	2.58743e-09	7.26334e-09
PRELP	1.38622	2.59401e-09	7.2718e-09
FADS3	0.557491	2.69522e-09	7.54513e-09
MXRA7	1.09696	3.16181e-09	8.8392e-09
CHI3L2	1.02628	3.20264e-09	8.94107e-09
RASL11A	1.0026	3.23565e-09	9.02087e-09
PTGER3	2.08215	3.57016e-09	9.93987e-09
SLC40A1	0.252853	3.73947e-09	1.0397e-08
NDN	1.12465	3.86319e-09	1.07264e-08
HPGD	0.965573	3.92829e-09	1.08923e-08
TMEM158	1.69328	3.94294e-09	1.09181e-08
NDUFA9	0.392196	4.16692e-09	1.15226e-08
DLGAP5	1.24646	4.26653e-09	1.17821e-08
RSPO3	1.68071	4.62514e-09	1.27551e-08
MT1X	0.188571	5.05592e-09	1.39243e-08
ADGRA2	1.60659	5.75261e-09	1.58216e-08
PALMD	0.80092	7.21131e-09	1.97801e-08
ARL2	0.40044	7.89557e-09	2.16279e-08
NT5E	1.04458	8.08236e-09	2.21099e-08
ELN	1.63309	8.15066e-09	2.22668e-08
BPGM	0.406794	8.31287e-09	2.26796e-08
TMEM47	1.1242	8.38233e-09	2.28385e-08
LBP	1.9086	9.28274e-09	2.51907e-08
IRS1	1.99499	9.53929e-09	2.58525e-08
AKAP12	1.09737	1.03012e-08	2.78434e-08
IGF1R	1.40142	1.08379e-08	2.92551e-08
TIFA	0.25419	1.34618e-08	3.62419e-08
CPNE5	0.835674	1.44591e-08	3.88756e-08
INTU	1.58783	1.56925e-08	4.21362e-08
IGLV3-19	0.468739	1.59425e-08	4.26949e-08
FMO1	2.14306	1.61203e-08	4.31144e-08
FAM171B	1.66701	1.78033e-08	4.75531e-08
CHN1	0.554453	1.87407e-08	4.99916e-08
AHNAK2	0.701986	1.87942e-08	5.00686e-08
HGF	1.51037	1.9201e-08	5.10858e-08
IGHV4-59	1.23039	1.94221e-08	5.16066e-08
ACTG2	1.50875	2.46829e-08	6.54996e-08
SEPT4	0.864971	2.75586e-08	7.30357e-08
ITGBL1	2.45319	2.92391e-08	7.72883e-08
CFB	1.09271	3.25293e-08	8.5763e-08
MTHFS	0.244811	3.2812e-08	8.63965e-08
IGHV4-61	2.03828	3.5558e-08	9.33855e-08
BNC2	1.56752	3.62402e-08	9.50547e-08
GNPDA2	0.699505	3.69541e-08	9.68025e-08
PTPRG	1.26449	3.7325e-08	9.76487e-08
ANKRD30A	3.44998	3.74915e-08	9.79586e-08
FSTL3	1.24504	3.81303e-08	9.95e-08
ASPN	2.19405	4.21127e-08	1.09611e-07
COL5A3	2.05107	4.53559e-08	1.17902e-07
C11orf70	2.39328	4.69377e-08	1.21859e-07
C1QTNF6	1.38712	4.86572e-08	1.26162e-07
RBM7	0.312727	5.0222e-08	1.30054e-07
GALNT16	2.10955	5.19832e-08	1.34444e-07
PTPN13	1.14148	5.77946e-08	1.49284e-07
SCARB1	0.591649	6.19478e-08	1.59608e-07
ADAMTS2	1.11742	6.79012e-08	1.74726e-07
PDK4	0.6177	7.25495e-08	1.86451e-07
NID2	1.82449	7.39428e-08	1.89793e-07
NR2F1-AS1	1.49236	7.49647e-08	1.92001e-07
IL1R1	0.850553	9.51808e-08	2.4217e-07
PODN	1.95871	1.00911e-07	2.56429e-07
IGKV1D-8	3.1519	1.17906e-07	2.99243e-07
ALPL	1.31501	1.38504e-07	3.50213e-07
TMTC3	0.850688	1.46042e-07	3.68814e-07
NPW	1.3338	1.52438e-07	3.8449e-07
HOXA10	1.46573	1.69756e-07	4.27642e-07
SPEG	1.36782	1.73712e-07	4.37067e-07
KLF7	0.631908	1.75174e-07	4.40202e-07
FXYD1	0.720665	1.81082e-07	4.54488e-07
NES	0.881665	1.8615e-07	4.66635e-07
SYNC	1.09162	1.94434e-07	4.86803e-07
PLEKHA4	1.11147	2.01888e-07	5.04843e-07
DYRK3	1.2373	2.08657e-07	5.21131e-07
DCX	3.07725	2.26087e-07	5.63972e-07
OGN	2.26089	2.53824e-07	6.32387e-07
LPL	1.70575	2.67963e-07	6.668e-07
RBMS3	1.04206	2.76303e-07	6.86715e-07
MIR4458HG	0.902434	2.9216e-07	7.2524e-07
SDHD	0.150829	2.93365e-07	7.27344e-07
SCGB1D2	1.47685	3.77543e-07	9.34912e-07
NEDD4	1.12113	3.79268e-07	9.38045e-07
EVA1B	0.628573	3.95537e-07	9.75913e-07
DIRAS3	2.4294	4.73048e-07	1.16575e-06
ARHGEF17	1.179	5.02273e-07	1.23627e-06
SPOCK1	2.78114	5.323e-07	1.3086e-06
PLA2G2A	1.90559	5.48152e-07	1.34271e-06
ALKBH6	0.381616	5.52247e-07	1.35112e-06
LDB2	0.742953	5.64893e-07	1.3804e-06
IGKV2-30	1.42222	5.7259e-07	1.39753e-06
FBXO4	0.536832	5.94735e-07	1.44984e-06
POLI	0.816647	6.49879e-07	1.58238e-06
HIGD1A	0.330058	6.78916e-07	1.64914e-06
GABBR1	1.44365	7.07846e-07	1.71737e-06
JAG1	0.5536	7.32171e-07	1.77427e-06
KLHL13	2.21944	7.82998e-07	1.89519e-06
RABGAP1	0.376623	8.22384e-07	1.98816e-06
COPZ2	1.49486	8.87955e-07	2.14238e-06
HAAO	1.2172	9.10483e-07	2.19075e-06
SHOX2	1.87263	9.73909e-07	2.3406e-06
HYAL2	0.38418	9.79894e-07	2.35221e-06
SCGB2A1	1.55356	9.89854e-07	2.37332e-06
CST3	0.168621	1.0034e-06	2.40298e-06
TTC28	1.05029	1.1025e-06	2.63719e-06
OSR2	1.46202	1.21856e-06	2.9114e-06
RBM45	0.841831	1.24918e-06	2.97759e-06
ADGRA3	1.87533	1.25227e-06	2.98144e-06
ANKRD28	-0.0451466	1.28834e-06	3.06018e-06
HIST1H1B	1.11484	1.38745e-06	3.29177e-06
NRN1	0.937577	1.42877e-06	3.38586e-06
NTM	2.62351	1.48639e-06	3.51832e-06
AMFR	0.512466	1.50063e-06	3.54789e-06
GPC3	1.85158	1.53577e-06	3.62676e-06
TMEM108	2.35381	1.5407e-06	3.63419e-06
FAAP24	1.13457	1.68577e-06	3.96231e-06
MXD4	0.330975	1.68758e-06	3.96231e-06
GPC6	2.06097	1.83036e-06	4.2926e-06
IGKV3-7	2.88485	1.88857e-06	4.42404e-06
EFNB2	0.852924	1.89116e-06	4.425e-06
HNRNPH2	0.285499	1.91478e-06	4.47514e-06
HMGCL	0.32361	1.94918e-06	4.55031e-06
FOXC1	0.947128	1.9781e-06	4.61254e-06
SMOC2	0.992998	2.00085e-06	4.66028e-06
UNK	0.458154	2.1651e-06	5.03707e-06
VCAM1	0.5967	2.18855e-06	5.08582e-06
EGFL6	1.80303	2.20593e-06	5.12036e-06
HMCN1	2.68241	2.22565e-06	5.16026e-06
EDN2	1.80811	2.3817e-06	5.5158e-06
CYYR1	0.905551	2.49859e-06	5.77995e-06
CBX6	0.354242	2.6081e-06	6.02644e-06
COL10A1	3.42343	2.69443e-06	6.21886e-06
HEY2	1.87747	2.94763e-06	6.79555e-06
VWA5A	0.927063	2.96979e-06	6.8389e-06
HS2ST1	0.524442	3.05224e-06	7.02085e-06
PDGFD	1.21746	3.08326e-06	7.0842e-06
ABI3BP	1.87335	3.3733e-06	7.74188e-06
MMP16	2.548	3.39735e-06	7.7883e-06
PPP1R3D	0.994145	3.48721e-06	7.98533e-06
CXCL14	0.920864	3.84389e-06	8.7922e-06
RBP5	1.27892	4.57678e-06	1.04568e-05
IGHV3-43	2.21836	4.85375e-06	1.10772e-05
C4orf46	0.852502	5.1178e-06	1.16668e-05
CCDC71L	0.605967	5.65379e-06	1.28598e-05
CDO1	1.90649	5.81698e-06	1.32163e-05
ZNF532	0.836886	5.9074e-06	1.33919e-05
IGKV1D-16	2.25002	6.55327e-06	1.4823e-05
RNF152	1.27117	6.72835e-06	1.51854e-05
TBC1D4	0.115263	6.84898e-06	1.54405e-05
FBXL3	0.346441	7.20042e-06	1.62149e-05
TNS2	0.801568	7.40255e-06	1.66333e-05
GALNT5	2.36836	7.57569e-06	1.70036e-05
PPP2R5B	0.540288	7.6336e-06	1.71147e-05
PLPP1	0.0710335	7.64484e-06	1.71211e-05
NCK2	0.268971	8.47425e-06	1.8937e-05
IGHA1	0.0290825	9.96657e-06	2.21988e-05
NINL	2.17272	1.05467e-05	2.34398e-05
FEZ1	1.21722	1.10884e-05	2.46167e-05
IGHG2	1.09528	1.14788e-05	2.54155e-05
NME5	2.77971	1.14795e-05	2.54155e-05
NEXN	0.668208	1.14856e-05	2.54155e-05
HSPA2	0.554103	1.21928e-05	2.69219e-05
HEPH	2.0182	1.24614e-05	2.74852e-05
NPNT	1.59455	1.31213e-05	2.89094e-05
THBS1	0.189423	1.34865e-05	2.96819e-05
MED6	0.346714	1.36207e-05	2.99449e-05
MATN2	1.12487	1.43702e-05	3.15246e-05
MMP7	0.679482	1.50824e-05	3.30161e-05
SAA1	0.535557	1.51464e-05	3.31206e-05
NHSL1	1.35107	1.53463e-05	3.35218e-05
NLGN2	1.84041	1.54028e-05	3.3609e-05
SCGB3A1	2.03771	1.54273e-05	3.36265e-05
IGFBP2	0.760615	1.57657e-05	3.43274e-05
IGHV4-34	0.436148	1.6095e-05	3.50071e-05
SAA2	0.71866	1.69191e-05	3.67603e-05
TSTD3	1.08439	1.785e-05	3.87415e-05
EPB41L4A	1.52687	1.8754e-05	4.06603e-05
HSPB8	1.3197	1.91868e-05	4.15544e-05
KRT6B	0.508188	1.95906e-05	4.23839e-05
PARM1	0.912619	1.98749e-05	4.29079e-05
VARS2	0.962151	2.00694e-05	4.3282e-05
PLCE1	1.13234	2.02809e-05	4.36461e-05
HOXC6	1.65383	2.02811e-05	4.36461e-05
GPS2	0.316094	2.03762e-05	4.38045e-05
EN1	2.00277	2.0538e-05	4.40654e-05
PPP1R12B	0.464763	2.05408e-05	4.40654e-05
TSPAN8	2.08575	2.0783e-05	4.45381e-05
TGFBR3	0.330569	2.09209e-05	4.47865e-05
RAB6B	1.78447	2.38872e-05	5.09299e-05
PLLP	1.43615	2.38906e-05	5.09299e-05
NOMO1	0.966956	2.42658e-05	5.16757e-05
IGHV3-11	0.596717	2.47143e-05	5.25759e-05
DUSP5	0.0305971	2.48146e-05	5.27343e-05
STEAP4	0.684222	2.49271e-05	5.29182e-05
SLIT3	1.14801	2.51948e-05	5.34307e-05
FBXL13	1.93287	2.60923e-05	5.52767e-05
PDE5A	1.54418	2.63991e-05	5.58684e-05
IGHV1-69	1.48924	2.64996e-05	5.60229e-05
LCN2	0.709826	2.79407e-05	5.89474e-05
MPRIP	0.0901553	2.8866e-05	6.08365e-05
KDELC1	1.35032	2.95194e-05	6.21493e-05
ABCA6	1.43701	2.99079e-05	6.29022e-05
SYNJ2BP	0.609862	3.03793e-05	6.38279e-05
HK2	0.644222	3.10268e-05	6.5121e-05
IL20	2.5356	3.34824e-05	7.02027e-05
FLNC	2.02657	3.48085e-05	7.29082e-05
ZEB1-AS1	1.10584	3.49056e-05	7.30365e-05
CPQ	0.249811	3.59642e-05	7.51745e-05
PIGR	2.40706	3.78114e-05	7.87931e-05
CXCL1	0.752273	4.04845e-05	8.41054e-05
ZNF787	1.03117	4.09446e-05	8.49747e-05
CACNA2D1	1.64023	4.10442e-05	8.50948e-05
OLFML1	1.66385	4.37422e-05	9.05041e-05
SFRP4	1.79155	4.41275e-05	9.12088e-05
NFATC4	1.95011	4.43109e-05	9.1495e-05
RTKN2	0.278005	4.47645e-05	9.23381e-05
MRGPRF	1.34094	4.48364e-05	9.23929e-05
CAPN6	2.3064	4.61522e-05	9.48166e-05
HIST1H2AL	1.30859	4.73185e-05	9.70172e-05
PTEN	0.170819	4.75818e-05	9.74591e-05
NDUFA4L2	0.547592	5.10856e-05	0.000104426
ADAMTS4	0.662607	5.39899e-05	0.000110252
CDKN1C	0.694433	5.54454e-05	0.000112998
SCGB1B2P	2.48726	5.66601e-05	0.000115248
TMEM44	1.0931	5.66627e-05	0.000115248
PHC1	0.674179	5.6909e-05	0.000115602
UBXN8	0.715355	5.69504e-05	0.000115602
FAM109B	1.07881	5.83965e-05	0.00011842
ZBTB40	0.574173	5.89676e-05	0.000119459
CAP2	1.41436	6.02629e-05	0.000121962
TOPORS	0.0137213	6.20733e-05	0.000125501
INHBA	0.993838	6.50764e-05	0.000131443
FBXL8	0.712607	7.2359e-05	0.000146008
MPZ	2.07567	8.03929e-05	0.000161738
MMP15	1.49127	8.29505e-05	0.000166719
IGHV3-64	2.39859	8.31208e-05	0.000166897
OSR1	1.51348	8.45434e-05	0.000169586
MTERF1	0.654808	8.56486e-05	0.000171634
PTHLH	1.49151	8.96308e-05	0.000179438
JAM3	1.13326	9.18447e-05	0.000183509
PIP	1.51141	9.42873e-05	0.000188205
CCZ1	0.310996	0.000100525	0.00020046
TDRP	1.89063	0.000101853	0.000202711
GAS6	0.238147	0.000103428	0.000205644
FCRL5	0.439168	0.00010357	0.000205727
CILP	2.19329	0.000107757	0.000213835
CXCL17	0.560689	0.000108734	0.000215354
ITGA11	2.59136	0.000109761	0.000217001
SDHAF2	0.261524	0.000118429	0.000233423
ID1	0.219759	0.000119994	0.000236278
KALRN	1.52066	0.000122468	0.000240917
ITPRIPL2	0.503269	0.000128966	0.000253455
FMO2	1.28484	0.00012982	0.000254888
SPOCD1	2.07507	0.000130704	0.000256377
CCNG2	0.35999	0.000150967	0.000295837
IGHV3-53	0.546797	0.000153679	0.000300862
EBF1	0.537193	0.000154449	0.000301789
ACVR2A	1.0622	0.000159801	0.000311948
TFPI2	1.23456	0.000170455	0.000332428
PCOLCE2	1.85507	0.000171863	0.000334854
IGHV3-20	2.06348	0.000172968	0.000336684
ZNF649	0.909724	0.000180816	0.000351625
PSORS1C2	1.75495	0.000185656	0.000360694
TANC2	0.753446	0.000193492	0.00037556
R3HDM2	0.22849	0.000201031	0.00038982
SEMA4C	0.792167	0.000202839	0.000392952
BRMS1L	0.579761	0.000207689	0.000401967
TWIST1	1.79178	0.000212165	0.000410239
ZNF358	0.968808	0.000214461	0.000414285
FOXK1	0.451677	0.000216082	0.000416627
ARC	1.04001	0.000216929	0.000417865
[truncated: 1,232 more rows]
