# Supplementary material for: SIDISH Identifies High-Risk Disease-Associated Cells and Biomarkers by Integrating Single-Cell Depth and Bulk Breadth
Source: Research Square preprint supplement (doi:10.21203/rs.3.rs-5921999/v1), 2025-03-10
Supplement: Supplementary file 4 [file 35b582dcac243b234c989646.xlsx]

## Sheet: Summary
Descriptions:
1. Labeled cells: Predicted risk scores and SIDISH labels for TNBC subset of breast cancer cells .
2. Differential expression genes: All the differentially expressed genes between High-Risk cells and Background cells with an adjusted P value < 0.05. The log Fold change was calculated using a two-tailed Wilcoxon rank sum test.
3. SIDISH marker genes: List of genes that were upregulated in the High-Risk cells.

## Sheet: 1.Labeled cells
	risk_value	SIDISH score
CID44041_AAAGTAGTCCTAGGGC	-0.120406	Background
CID44041_AACACGTCAACACCTA	-0.0976361	Background
CID44041_AACTTTCTCCTACAGA	-0.0949168	Background
CID44041_AAGGCAGTCATTGCGA	-0.105163	Background
CID44041_AAGGTTCGTTGTCGCG	-0.116608	Background
CID44041_AATCGGTAGAGCTGGT	-0.102678	Background
CID44041_ACCAGTACATGCTGGC	-0.106182	Background
CID44041_ACCTTTAAGACGCAAC	-0.104495	Background
CID44041_ACGGAGATCGATGAGG	-0.118975	Background
CID44041_ACTGCTCAGCTGTCTA	-0.103388	Background
CID44041_ACTTGTTCATGGTAGG	-0.124602	Background
CID44041_AGGTCATTCACCCTCA	-0.100394	Background
CID44041_AGTCTTTTCACTATTC	-0.0907913	Background
CID44041_AGTGTCACAAGCTGGA	-0.0996899	Background
CID44041_ATAAGAGGTAGCCTCG	-0.0967932	Background
CID44041_CAAGAAATCCCGGATG	-0.0940069	Background
CID44041_CACATAGCATTTGCTT	-0.0905572	Background
CID44041_CACTCCAAGTTGAGAT	-0.1319	Background
CID44041_CAGCATATCCGGCACA	-0.108296	Background
CID44041_CAGCGACCATGGTCTA	-0.107694	Background
CID44041_CAGGTGCCATACTCTT	-0.0901495	Background
CID44041_CATATGGTCAGGCCCA	-0.0863721	Background
CID44041_CATCGGGAGTGGTCCC	-0.090447	Background
CID44041_CCACTACTCCAGATCA	-0.10637	Background
CID44041_CCAGCGAAGTGCGATG	-0.0987545	Background
CID44041_CCGGGATCAGATGGCA	-0.114124	Background
CID44041_CCTTACGGTAATCACC	-0.106713	Background
CID44041_CGACCTTGTTCCACAA	-0.129264	Background
CID44041_CGACTTCTCGCTTAGA	-0.0901908	Background
CID44041_CGCGTTTGTGCTGTAT	-0.130831	Background
CID44041_CGCTGGAGTCGAGATG	-0.122814	Background
CID44041_CGGGTCATCTTGCCGT	-0.0970547	Background
CID44041_CGTCACTTCACCATAG	-0.088952	Background
CID44041_CGTCAGGTCGGTCCGA	-0.0937098	Background
CID44041_CGTGAGCTCCTAGTGA	-0.0983036	Background
CID44041_CGTGTAAGTCACTTCC	-0.0879908	Background
CID44041_CGTTCTGGTCAGAAGC	-0.101641	Background
CID44041_CTACACCAGTACTTGC	-0.0912776	Background
CID44041_CTACCCAGTCTCACCT	-0.10556	Background
CID44041_CTAGTGATCACCCGAG	-0.0931558	Background
CID44041_GAAACTCAGGAATTAC	-0.0898237	Background
CID44041_GAATAAGCAATGGTCT	-0.102993	Background
CID44041_GACCAATAGCCACTAT	-0.0957203	Background
CID44041_GATCGATCATGTAGTC	-0.0951592	Background
CID44041_GCAAACTTCGGAGCAA	-0.124042	Background
CID44041_GCATGATAGAACAATC	-0.0991963	Background
CID44041_GGCCGATCACTCGACG	-0.094552	Background
CID44041_GTAACTGGTAAACCTC	-0.0841071	Background
CID44041_GTACGTACAATGTTGC	-0.0949348	Background
CID44041_GTCAAGTAGGGTGTTG	-0.121486	Background
CID44041_GTGTTAGAGGAATGGA	-0.0890099	Background
CID44041_TAAGAGATCTGTCAAG	-0.0990598	Background
CID44041_TACGGGCAGCGAAGGG	-0.115265	Background
CID44041_TAGACCAGTCGAACAG	-0.0878668	Background
CID44041_TATGCCCGTCGACTGC	-0.0956101	Background
CID44041_TCAGGATGTCTCCATC	-0.0937667	Background
CID44041_TCATTTGTCACCTCGT	-0.087315	Background
CID44041_TCGTAGAAGAACTCGG	-0.0912561	Background
CID44041_TCGTAGACAGACACTT	-0.113061	Background
CID44041_TCTATTGCACCTGGTG	-0.131684	Background
CID44041_TCTCATAGTCACAAGG	-0.0875683	Background
CID44041_TGATTTCTCACCATAG	-0.0983056	Background
CID44041_TGCCAAAGTTGTTTGG	-0.0933936	Background
CID44041_TGGCTGGTCATCATTC	-0.103512	Background
CID44041_TGGGAAGAGCCCAATT	-0.0880623	Background
CID44041_TGGGCGTGTTATGTGC	-0.103618	Background
CID44041_TGTCCCAAGTATCTCG	-0.0898872	Background
CID44041_TTAGGCATCGGAAATA	-0.0853288	Background
CID44041_TTTACTGCATGACGGA	-0.116892	Background
CID44041_TCGGTAAAGATGGGTC	-0.113846	Background
CID44041_CGGTTAATCTAAGCCA	-0.0943263	Background
CID44041_CATCGAACATATACCG	-0.0842479	Background
CID44041_CCTCAGTGTCCAGTGC	-0.0863312	Background
CID44041_GCTGCGAAGAGTACCG	-0.115976	Background
CID44041_GGATTACAGAGGTTGC	-0.09212	Background
CID44041_ACGGAGACATCTCGCT	-0.10784	Background
CID44041_ATCCGAAGTGCAGACA	-0.10523	Background
CID44041_CATGGCGGTTCTGTTT	-0.098766	Background
CID44041_CTAATGGTCTACCTGC	-0.0843303	Background
CID44041_TCCCGATTCAAACAAG	-0.0943178	Background
CID44041_GGCTCGAGTTGCCTCT	-0.094878	Background
CID44041_AGTCTTTAGCAAATCA	-0.114652	Background
CID44041_TCATTTGTCCTGTAGA	-0.115625	Background
CID44041_TTGCGTCTCAGCACAT	-0.107174	Background
CID44041_GCATGATCAGTGACAG	-0.125951	Background
CID44041_CAGCTGGAGACAGAGA	-0.085511	Background
CID44041_CGACTTCGTTCTCATT	-0.107606	Background
CID44041_TTCTACAAGCTATGCT	-0.106252	Background
CID44041_AAAGCAAAGTAGGCCA	-0.0836347	Background
CID44041_AAGGCAGAGACTTTCG	-0.101251	Background
CID44041_AATCGGTGTTCTGGTA	-0.0910994	Background
CID44041_ATCCACCAGTGAAGTT	-0.0859732	Background
CID44041_CAACCAAAGTTAAGTG	-0.090153	Background
CID44041_CAGCGACGTTGCCTCT	-0.124791	Background
CID44041_CAGGTGCAGTTGAGTA	-0.111169	Background
CID44041_CCTAAAGCAATAACGA	-0.103922	Background
CID44041_CGTCCATAGCTAGCCC	-0.102914	Background
CID44041_CTAACTTGTGCAACTT	-0.0917431	Background
CID44041_CTTACCGGTGTGTGCC	-0.124846	Background
CID44041_GAACATCTCAACGAAA	-0.106712	Background
CID44041_GACGGCTTCGGTGTTA	-0.110751	Background
CID44041_GACTAACTCCACTGGG	-0.114059	Background
CID44041_GAGCAGAGTAGCGATG	-0.139834	Background
CID44041_GATGAAAAGTCAATAG	-0.108572	Background
CID44041_GCAGCCATCTTGAGGT	-0.084278	Background
CID44041_GTAACGTGTGAGGGAG	-0.115591	Background
CID44041_GTCTCGTGTACAAGTA	-0.0848763	Background
CID44041_TAAGAGAAGCCGATTT	-0.103249	Background
CID44041_TATCAGGAGCATCATC	-0.120202	Background
CID44041_TTTACTGTCAGGATCT	-0.089453	Background
CID44041_AATCGGTGTGTTTGTG	-0.119777	Background
CID44041_ACGCCAGAGGTGTGGT	-0.103135	Background
CID44041_CACAGGCGTGAAAGAG	-0.108167	Background
CID44041_CCCAATCTCACCAGGC	-0.113874	Background
CID44041_CCCTCCTGTCGGCATC	-0.109083	Background
CID44041_CCTATTAAGAGGTAGA	-0.0969199	Background
CID44041_CGTAGCGCAACACGCC	-0.130557	Background
CID44041_CTGATAGAGTGTACGG	-0.09716	Background
CID44041_GTATTCTTCACGCATA	-0.0906228	Background
CID44041_TATGCCCGTACTCGCG	-0.084076	Background
CID44041_TTGAACGCACCGATAT	-0.0861371	Background
CID44041_ATCTACTGTTCCAACA	-0.0846005	Background
CID44041_AACACGTAGTTGAGTA	-0.116926	Background
CID44041_AGGCCACCATATGCTG	-0.14449	Background
CID44041_ATCTGCCGTGCGGTAA	-0.0885088	Background
CID44041_GCACTCTTCTCGCTTG	-0.126489	Background
CID44041_AACCGCGCACATCCAA	-0.0861746	Background
CID44041_ACTGTCCTCTGTGCAA	-0.0948216	Background
CID44041_CAACTAGAGGTGCACA	-0.0974507	Background
CID44041_CACATAGAGTACGACG	-0.0959578	Background
CID44041_CACCTTGGTCTAAAGA	-0.0863734	Background
CID44041_CCTTCGATCACCAGGC	-0.0956663	Background
CID44041_CGTCAGGTCCACGACG	-0.0850268	Background
CID44041_CTCTAATAGCTAACTC	-0.113219	Background
CID44041_CTGAAGTCAGGACCCT	-0.111628	Background
CID44041_GGAGCAAGTACACCGC	-0.119358	Background
CID44041_GTCGGGTTCCGCGGTA	-0.127546	Background
CID44041_GTTCTCGAGTGACTCT	-0.0898451	Background
CID44041_TGCCCTATCTTACCTA	-0.124687	Background
CID44041_TGTATTCGTCAACTGT	-0.0965059	Background
CID44041_TGTCCCAAGTTTGCGT	-0.120601	Background
CID44041_TTTATGCAGACGCACA	-0.112552	Background
CID44041_AAAGTAGTCTGATTCT	-0.0860131	Background
CID44041_ACATCAGAGAGCCTAG	-0.0793129	Background
CID44041_ACCCACTGTCTTCTCG	-0.0758197	Background
CID44041_ACGCAGCCACGGATAG	-0.085193	Background
CID44041_ACTGATGGTCGGCACT	-0.0842873	Background
CID44041_ACTTGTTTCAACACCA	-0.0846235	Background
CID44041_AGAATAGAGCGCTCCA	-0.0863062	Background
CID44041_AGACGTTAGTTCCACA	-0.0779363	Background
CID44041_AGACGTTGTCCGTGAC	-0.0545362	Background
CID44041_AGATTGCGTCTGCAAT	-0.0852126	Background
CID44041_AGCCTAAGTAAACACA	-0.0856121	Background
CID44041_AGGTCATAGCCATCGC	-0.0851083	Background
CID44041_AGTGAGGCAGAGTGTG	-0.0876156	Background
CID44041_ATCTACTCACAGGTTT	-0.0885218	Background
CID44041_ATGCGATGTTCCGTCT	-0.0837472	Background
CID44041_ATGTGTGAGAATGTGT	-0.0733564	Background
CID44041_ATTGGACTCCGCGCAA	-0.0882042	Background
CID44041_CAACCTCTCAGGCAAG	-0.0884548	Background
CID44041_CACACTCAGGTGGGTT	-0.0828712	Background
CID44041_CACATAGTCTGTTGAG	-0.0248813	Background
CID44041_CACATTTCATCACGTA	-0.0742798	Background
CID44041_CAGATCAAGCCAGAAC	-0.055775	Background
CID44041_CAGATCAGTAAGGATT	-0.0837321	Background
CID44041_CATCAGAAGGATATAC	-0.0826608	Background
CID44041_CATGGCGTCGAATGGG	-0.0852902	Background
CID44041_CCGTGGAGTTTGGGCC	-0.0881538	Background
CID44041_CCTATTACAAGGACTG	-0.087274	Background
CID44041_CCTTCCCAGTCTCGGC	-0.505645	Background
CID44041_CGATGGCCATGCTGGC	-0.0884986	Background
CID44041_CGCTGGATCATGCAAC	-0.0796711	Background
CID44041_CGTCTACCAGCAGTTT	-0.0865687	Background
CID44041_CTCACACCAAAGGCGT	-0.0876179	Background
CID44041_CTCGGGAAGATAGTCA	-0.0878131	Background
CID44041_CTTCTCTCATATGAGA	-0.0830895	Background
CID44041_GAACCTAAGGTAAACT	-0.0813603	Background
CID44041_GACACGCGTCTCCACT	-0.0743571	Background
CID44041_GACCTGGAGACAGGCT	-0.0802161	Background
CID44041_GACGTTACACTGCCAG	-0.0887833	Background
CID44041_GAGTCCGTCCCAGGTG	-0.0871265	Background
CID44041_GCATGATTCTACGAGT	-0.0833921	Background
CID44041_GGAAAGCAGATAGGAG	-0.0880065	Background
CID44041_GGCGACTCATGTCTCC	-0.0866047	Background
CID44041_GTAACGTTCGGAGGTA	-0.0890413	Background
CID44041_GTACTCCTCCCGGATG	-0.0831321	Background
CID44041_GTACTTTAGCTCAACT	-0.0855265	Background
CID44041_GTCATTTCACACCGAC	-0.0883055	Background
CID44041_GTCATTTGTCTGGTCG	-0.0845528	Background
CID44041_GTGCTTCTCTTGCCGT	-0.0879009	Background
CID44041_TACAGTGGTTCAACCA	-0.0862061	Background
CID44041_TAGAGCTGTTACTGAC	-0.0844773	Background
CID44041_TAGAGCTTCAAGGTAA	-0.0885005	Background
CID44041_TAGCCGGTCGTTTGCC	-0.0761319	Background
CID44041_TATGCCCGTCTAGAGG	-0.0872684	Background
CID44041_TCACGAATCTTATCTG	-0.0771131	Background
CID44041_TCAGCAAAGTTCGCGC	-0.0884121	Background
CID44041_TCGCGAGAGTGAATTG	-0.0873984	Background
CID44041_TCGCGTTGTCCAGTAT	-0.0847627	Background
CID44041_TCTGAGAAGAAAGTGG	-0.0886823	Background
CID44041_TCTTCGGAGCGTGAGT	-0.0643339	Background
CID44041_TGGTTAGGTCAAAGAT	-0.0757673	Background
CID44041_TTAGGACTCATTCACT	-0.071152	Background
CID44041_TTGCCGTAGTTAAGTG	-0.0861852	Background
CID44041_TTTCCTCGTCAGAATA	-0.0890244	Background
CID44041_AACCATGCATGTAAGA	-0.0842252	Background
CID44041_AACGTTGTCCCTTGCA	-0.0839248	Background
CID44041_ACGCAGCCATATGGTC	-0.0847522	Background
CID44041_ACTTGTTTCTTCATGT	-0.0690551	Background
CID44041_CAACTAGAGTACACCT	-0.0880051	Background
CID44041_CACATAGTCTAGCACA	-0.0875365	Background
CID44041_CAGCCGAAGATCCGAG	-0.0875898	Background
CID44041_CAGTCCTCACGCGAAA	-0.0891315	Background
CID44041_CCCTCCTAGCGAAGGG	-0.085992	Background
CID44041_CGGCTAGTCAACCATG	-0.0870833	Background
CID44041_CGTGTCTGTAGGAGTC	-0.0945286	Background
CID44041_CTAATGGTCCTCATTA	-0.0843114	Background
CID44041_CTCGAAATCCTATGTT	-0.0849164	Background
CID44041_GACCTGGGTGGCAAAC	-0.0833814	Background
CID44041_GCATGATGTACGACCC	-0.0881061	Background
CID44041_TACTTACCACCTGGTG	-0.0839958	Background
CID44041_TACTTACTCCAAAGTC	-0.0861889	Background
CID44041_TGGTTCCGTAGCGCAA	-0.0820354	Background
CID44041_TTAGGCACATGATCCA	-0.0864912	Background
CID44041_TTGGCAAGTGGCAAAC	-0.0850549	Background
CID44041_AGCCTAAGTTCTGTTT	-0.0741066	Background
CID44041_AGCGTATAGGAGTACC	-0.0832113	Background
CID44041_CACATAGAGCTTCGCG	-0.0865393	Background
CID44041_CCTCTGACACGGCTAC	-0.086202	Background
CID44041_CGATGTATCCTTAATC	-0.0393778	Background
CID44041_CGCCAAGTCAAAGACA	-0.0795938	Background
CID44041_CGTGAGCCAATCACAC	-0.0333754	Background
CID44041_GCTCCTAGTTTGGCGC	-0.0676452	Background
CID44041_TCACAAGAGTCATCCA	-0.0417054	Background
CID44041_TGATTTCAGTCATCCA	-0.0875411	Background
CID44041_TGGTTAGCAATGCCAT	-0.0650021	Background
CID44041_AAGTCTGCACGGACAA	-0.0882332	Background
CID44041_ACTTGTTCAGCGTCCA	-0.0839748	Background
CID44041_AGCCTAAAGATACACA	-0.0887179	Background
CID44041_ATTCTACGTAATCGTC	-0.0843	Background
CID44041_ATTGGTGCATGGTCAT	-0.0881723	Background
CID44041_CAACTAGGTCACACGC	-0.0856286	Background
CID44041_CAGAGAGTCGATCCCT	-0.0866448	Background
CID44041_CTCGGGATCTTCAACT	-0.0878507	Background
CID44041_GGGACCTCACCAACCG	-0.0825333	Background
CID44041_GTACGTAAGTAATCCC	-0.0878254	Background
CID44041_GTACTCCAGTCTCCTC	-0.0696819	Background
CID44041_GTATTCTAGTGAATTG	-0.089039	Background
CID44041_TCCCGATTCCATGCTC	-0.0834924	Background
CID44041_TGGCTGGCACGCATCG	-0.0833063	Background
CID44041_TGGCTGGCAGACACTT	-0.0798217	Background
CID44041_TTCTCAATCGCCCTTA	-0.0872841	Background
CID44041_GGTATTGAGATGCCTT	-0.0869323	Background
CID44041_TGACAACAGCGAGAAA	-0.0881629	Background
CID44041_CTCGAAAAGCTTATCG	-0.0877593	Background
CID44041_GTAACTGAGTGTACCT	-0.0698602	Background
CID44041_TTGCCGTTCAGCAACT	-0.0877937	Background
CID44041_CATTATCAGCTGCGAA	-0.0885518	Background
CID44041_TACACGACAGAGTGTG	-0.0848494	Background
CID44041_AACTCCCAGTACCGGA	-0.0805185	Background
CID44041_AACTTTCGTGGCCCTA	-0.0872416	Background
CID44041_AAGACCTGTCAATGTC	-0.0878526	Background
CID44041_ACAGCTATCGTACCGG	-0.0861912	Background
CID44041_ACGAGGAAGAGTAAGG	-0.0876581	Background
CID44041_AGAATAGTCCGCTGTT	-0.0310251	Background
CID44041_ATCCGAAGTGTGAATA	-0.0361981	Background
CID44041_CACACAAAGCCACGCT	-0.0845874	Background
CID44041_CACCACTAGTTGCAGG	-0.0730016	Background
CID44041_CATCAGACAACACCTA	-0.0860498	Background
CID44041_CATGGCGTCCGCGTTT	-0.0884449	Background
CID44041_CCTAGCTGTACTTCTT	-0.0792189	Background
CID44041_CCTCTGACATCCCATC	-0.0838799	Background
CID44041_CGCTGGAGTCAATGTC	-0.0872384	Background
CID44041_CTACACCCATCCTAGA	-0.0842409	Background
CID44041_GAATAAGTCTCTTATG	-0.0882172	Background
CID44041_GATGCTATCACTTATC	-0.0782823	Background
CID44041_GCGGGTTTCTACTTAC	-0.0856187	Background
CID44041_GTCTTCGGTATAATGG	-0.0999089	Background
CID44041_GTGCTTCAGGATGGTC	-0.0879604	Background
CID44041_GTTCATTCAGGTCCAC	-0.0871801	Background
CID44041_TAAGTGCGTTGCTCCT	-0.0792515	Background
CID44041_TATCAGGCATGCTGGC	-0.082891	Background
CID44041_TCGGGACTCCCGACTT	-0.086722	Background
CID44041_TCTTCGGGTCGGCTCA	-0.0887874	Background
CID44041_TGCCCATAGCGTCAAG	-0.0760713	Background
CID44041_TGGCGCACACGGCCAT	-0.0820091	Background
CID44041_TGTATTCTCCTGTACC	-0.0879652	Background
CID44041_TGTTCCGAGCGGATCA	-0.0698783	Background
CID44041_AAACCTGAGCGTAGTG	-0.0872143	Background
CID44041_AAGTCTGAGTCTCCTC	-0.0820882	Background
CID44041_AATCCAGGTGATGTGG	-0.0818043	Background
CID44041_ACACCAATCAGTGTTG	-0.0886711	Background
CID44041_ACAGCTACAGACACTT	-0.0870447	Background
CID44041_ACGATGTCATGTCCTC	-0.0875873	Background
CID44041_ACGGGTCTCGCAAGCC	-0.0862474	Background
CID44041_ACTATCTGTTCCAACA	-0.0986835	Background
CID44041_ACTTACTAGACAAGCC	-0.0277023	Background
CID44041_ACTTTCAAGCTCCCAG	-0.0863623	Background
CID44041_AGCATACTCCCAGGTG	-0.116197	Background
CID44041_AGTAGTCGTCAAGCGA	-0.0877115	Background
CID44041_AGTAGTCTCCTCAATT	-0.0882947	Background
CID44041_AGTCTTTCAAACTGCT	-0.087415	Background
CID44041_ATAAGAGGTTCAGGCC	-0.0855324	Background
CID44041_ATAGACCTCCAGGGCT	-0.0824176	Background
CID44041_ATCCACCGTAGAGCTG	-0.0829692	Background
CID44041_ATTCTACGTTCATGGT	-0.079401	Background
CID44041_CAAGGCCTCACCAGGC	-0.0841521	Background
CID44041_CACACCTCAGTCGATT	-0.0885858	Background
CID44041_CACAGGCCATCTCGCT	-0.0879333	Background
CID44041_CACCTTGAGACTAGAT	-0.0857805	Background
CID44041_CCACCTATCAGAAATG	-0.0886003	Background
CID44041_CCAGCGACAGCCAATT	-0.0854548	Background
CID44041_CCAGCGATCATTATCC	-0.0659034	Background
CID44041_CCATGTCGTATAGTAG	-0.0821651	Background
CID44041_CCGTACTTCGTCGTTC	-0.0880705	Background
CID44041_CCGTGGAGTCTCACCT	-0.0553577	Background
CID44041_CCTATTAGTCACTTCC	-0.0881356	Background
CID44041_CGATGGCCATCGGAAG	-0.0517396	Background
CID44041_CGATTGACATATACGC	-0.0833342	Background
CID44041_CGGAGTCAGTGATCGG	-0.088036	Background
CID44041_CGGAGTCTCCGAATGT	-0.085964	Background
CID44041_CGGCTAGCACAGATTC	-0.0870366	Background
CID44041_CTCATTATCAGGTAAA	-0.0880802	Background
CID44041_CTCTGGTTCCTCAATT	-0.086198	Background
CID44041_CTGAAGTCAGATTGCT	-0.0873355	Background
CID44041_CTTCTCTCAATCTGCA	-0.0537986	Background
CID44041_GAACCTAAGATCTGAA	-0.0794131	Background
CID44041_GACGCGTTCATCGATG	-0.0854888	Background
CID44041_GACGTTAAGCTAGTTC	-0.082452	Background
CID44041_GACGTTAAGGGCTTCC	-0.0435065	Background
CID44041_GATTCAGAGTACCGGA	-0.0824222	Background
CID44041_GCAGCCATCTTGCATT	-0.08719	Background
CID44041_GCAGTTATCCACGAAT	-0.0468755	Background
CID44041_GCATACAGTTACAGAA	-0.0888839	Background
CID44041_GCATGATGTGACGCCT	-0.0821732	Background
CID44041_GCTGCGACACACCGCA	-0.0849398	Background
CID44041_GGACATTAGGGTCGAT	-0.0881708	Background
CID44041_GGATGTTTCTGTACGA	-0.0883526	Background
CID44041_GGGCACTCAACAACCT	-0.0876955	Background
CID44041_GGGTTGCGTGCACGAA	-0.0860741	Background
CID44041_GTCTCGTAGCCTCGTG	-0.0879594	Background
CID44041_GTGTGCGTCCGCGGTA	-0.0795163	Background
CID44041_GTTCGGGAGAAACCAT	-0.0877389	Background
CID44041_GTTTCTACATGGGAAC	-0.0815142	Background
CID44041_TAAGAGATCCCACTTG	-0.0347411	Background
CID44041_TAGAGCTTCGTACGGC	-0.0876647	Background
CID44041_TATCAGGAGGATGGAA	-0.0862716	Background
CID44041_TCAACGATCCTAAGTG	-0.0749739	Background
CID44041_TCAGCAACAATCCGAT	-0.0888261	Background
CID44041_TCCACACTCAGCTGGC	-0.0867458	Background
CID44041_TCGAGGCGTGCGCTTG	-0.0815946	Background
CID44041_TCGAGGCTCCACGTGG	-0.0870451	Background
CID44041_TGCCCTACATATACGC	-0.0861918	Background
CID44041_TGGGCGTCAGGGTTAG	-0.073144	Background
CID44041_TGTCCCAAGCGTAGTG	-0.0540763	Background
CID44041_TTAACTCTCTGTGCAA	-0.0882233	Background
CID44041_TTGCCGTCACTCTGTC	-0.0870454	Background
CID44041_TTTATGCGTTGTACAC	-0.075888	Background
CID44041_TTCGGTCCAGACGCAA	-0.081406	Background
CID44041_AAAGCAACAAATACAG	-0.0880855	Background
CID44041_ACTGAACGTTACGGAG	-0.0880023	Background
CID44041_CGAGCCATCGTCTGCT	-0.0881952	Background
CID44041_GGGCATCTCCAATGGT	-0.088755	Background
CID44041_ACAGCCGCATGCCCGA	-0.0863147	Background
CID44041_ATTATCCCATTCGACA	-0.072877	Background
CID44041_CCAATCCTCATCGATG	-0.0875013	Background
CID44041_CCATGTCTCCCTCTTT	-0.0842463	Background
CID44041_CTGATCCTCTCCTATA	-0.0840372	Background
CID44041_TCTCATACAGGGTACA	-0.0660129	Background
CID44041_CCTTTCTAGCAGCCTC	-0.0882555	Background
CID44041_AATCCAGGTTGTCTTT	-0.0887321	Background
CID44041_AGAGCGATCAATCTCT	-0.0651705	Background
CID44041_CACACTCAGTTCGCAT	-0.0789857	Background
CID44041_AACCATGTCTTGCATT	-0.071373	Background
CID44041_AATCGGTCAGGCTCAC	-0.087753	Background
CID44041_ACAGCTAAGCGTTTAC	-0.063629	Background
CID44041_CAGCTGGTCTACCTGC	-0.0877769	Background
CID44041_CAGGTGCCAGTAGAGC	-0.0886037	Background
CID44041_CCACGGATCCGAACGC	-0.0856966	Background
CID44041_CCCATACTCGCCTGTT	-0.0705994	Background
CID44041_CGCGGTATCAGTCCCT	-0.0882589	Background
CID44041_CTCACACGTCTCTCGT	-0.0854352	Background
CID44041_GACGTGCTCCGAACGC	-0.0854967	Background
CID44041_GACTACATCAGCTGGC	-0.0836506	Background
CID44041_GATCGCGCAGGTGCCT	-0.0830749	Background
CID44041_GCATGCGAGAGGGATA	-0.0865768	Background
CID44041_GTCTTCGGTCGCGTGT	0.0145418	Background
CID44041_TGTGGTAAGAAGGACA	-0.0741154	Background
CID44041_CCACTACGTCTCTCTG	-0.0889855	Background
CID44041_GCTGGGTTCTATCCCG	-0.0689993	Background
CID44041_GGACGTCAGTGAAGTT	-0.0777494	Background
CID44041_GGTATTGTCACGGTTA	-0.083781	Background
CID44041_TATGCCCGTTAAAGTG	-0.0742948	Background
CID44041_TCGTAGATCGCTGATA	-0.0827025	Background
CID44041_TGACTTTAGGCAGGTT	-0.089133	Background
CID44041_AGAGCTTTCACAGGCC	-0.0741754	Background
CID44041_CCTCAGTAGATGGGTC	-0.084409	Background
CID44041_AACCATGAGGACATTA	-0.084277	Background
CID44041_GTATTCTCAGGACGTA	-0.0862786	Background
CID44041_ACCAGTATCCTAGTGA	-0.0631724	Background
CID44041_GACGGCTTCAGCAACT	-0.0801623	Background
CID44041_GCATGTACATTTCACT	-0.0847099	Background
CID44041_TCAGCTCTCAGCTCTC	-0.0822063	Background
CID44041_GTCTTCGGTTGTCTTT	-0.0848857	Background
CID44041_ACTGAGTTCTTATCTG	-0.0876841	Background
CID44041_AAACCTGAGACAAAGG	-0.0689748	Background
CID44041_CGAGCACCACATGACT	-0.0400598	Background
CID44041_GTAACGTAGCCTCGTG	-0.0783814	Background
CID44041_TTGGCAATCTTATCTG	-0.0814299	Background
CID44041_AACACGTCACCGGAAA	-0.0768155	Background
CID44041_AACTCTTAGGTGCTAG	-0.0870598	Background
CID44041_AACTGGTTCTTCCTTC	-0.0499746	Background
CID44041_ACGAGCCAGGTTACCT	-0.0953085	Background
CID44041_ACTGCTCGTTATCCGA	-0.0886405	Background
CID44041_AGGGTGATCACGAAGG	-0.0876081	Background
CID44041_AGGTCCGCAGCTTCGG	-0.0884359	Background
CID44041_ATTACTCAGACTAAGT	-0.0862639	Background
CID44041_ATTCTACTCTATCCCG	-0.0790405	Background
CID44041_CAACCTCTCTTGGGTA	-0.0883027	Background
CID44041_CACACAAGTGGTAACG	-0.082842	Background
CID44041_CACACAATCGGGAGTA	-0.0637925	Background
CID44041_CAGATCAAGCATGGCA	-0.0876981	Background
CID44041_CAGATCATCATGCATG	-0.0851628	Background
CID44041_CAGCAGCTCTATCCTA	-0.0831031	Background
CID44041_CAGCGACCACGAAATA	-0.0856917	Background
CID44041_CAGTCCTCAGCGAACA	-0.0656369	Background
CID44041_CATCCACCATGGGACA	-0.0820185	Background
CID44041_CATTATCTCCCAACGG	-0.0872889	Background
CID44041_CCTACACAGTCAAGCG	-0.0868648	Background
CID44041_CCTATTACATATGCTG	-0.0873988	Background
CID44041_CCTATTAGTGCACCAC	-0.0829166	Background
CID44041_CCTTCCCGTCATACTG	-0.0834659	Background
CID44041_CGATCGGCAAGAGTCG	-0.0807869	Background
CID44041_CGGACTGGTTTAAGCC	-0.0223993	Background
CID44041_CGGGTCACATACAGCT	-0.0675176	Background
CID44041_CGTAGGCTCATCTGTT	-0.0557028	Background
CID44041_CGTCACTCAGTCCTTC	-0.0788831	Background
CID44041_CGTCTACAGAACAACT	-0.0883161	Background
CID44041_CTAGCCTCACGGTAGA	-0.0801422	Background
CID44041_CTGCCTAAGGGATGGG	-0.087178	Background
CID44041_GAAATGAAGCTAACTC	-0.0870383	Background
CID44041_GAATAAGGTACATCCA	-0.0748092	Background
CID44041_GAATGAATCTGATACG	-0.087685	Background
CID44041_GACGCGTCATTCCTCG	-0.0834753	Background
CID44041_GACGTGCTCTAGAGTC	-0.0844187	Background
CID44041_GACGTTAGTAATTGGA	-0.0832425	Background
CID44041_GACGTTAGTGGCAAAC	-0.0881278	Background
CID44041_GACTACACATTTGCTT	-0.0760955	Background
CID44041_GACTACATCCAAATGC	-0.0848089	Background
CID44041_GATCGATCACTCTGTC	-0.0650896	Background
CID44041_GATCTAGTCGCCAAAT	-0.0846669	Background
CID44041_GCAAACTTCTCCAGGG	-0.0832789	Background
CID44041_GCACATATCCACTCCA	-0.0770057	Background
CID44041_GCAGCCATCAGTTAGC	-0.0884154	Background
CID44041_GCATGATGTCTTCTCG	-0.0824587	Background
CID44041_GCATGCGTCGCACTCT	-0.0709946	Background
CID44041_GCCAAATTCCATGAAC	-0.0869418	Background
CID44041_GCGCAGTCAGCTCGCA	-0.0865597	Background
CID44041_GCGCAGTTCAGTTAGC	-0.0889168	Background
CID44041_GCTGGGTTCGTTTGCC	-0.0834713	Background
CID44041_GGCGTGTAGCAATATG	-0.0458291	Background
CID44041_GTCAAGTAGCTGAACG	-0.0890216	Background
CID44041_GTGGGTCTCCAATGGT	-0.0870121	Background
CID44041_TAAGAGACAAAGTGCG	-0.0576499	Background
CID44041_TAAGCGTAGATGTGTA	-0.0857137	Background
CID44041_TAGACCATCCTGCAGG	-0.0858551	Background
CID44041_TAGCCGGTCACGCGGT	-0.0888942	Background
CID44041_TCAGGATCAATCACAC	-0.0989957	Background
CID44041_TCTTCGGAGAGCTGGT	-0.0850953	Background
CID44041_TCTTCGGGTCTGGAGA	-0.0890078	Background
CID44041_TGACAACCACACCGCA	-0.0831135	Background
CID44041_TGAGCATCACGTGAGA	-0.0875999	Background
CID44041_TGAGCCGCAATAAGCA	-0.0768244	Background
CID44041_TGCACCTAGAAACCGC	-0.0874445	Background
CID44041_TGCTACCAGAGTACAT	-0.0887888	Background
CID44041_TGGCGCAGTGAACCTT	-0.0677636	Background
CID44041_TGGCTGGCACTGTCGG	-0.0877995	Background
CID44041_TGGGCGTAGCTAGGCA	-0.0657558	Background
CID44041_TTAACTCGTGGGTATG	-0.068629	Background
CID44041_TTAGGCAGTCAATGTC	-0.0878927	Background
CID44041_TTAGTTCTCTGCCAGG	-0.058867	Background
CID44041_TTCTTAGAGTGTCTCA	-0.0734189	Background
CID44041_TTGACTTAGGGAACGG	-0.0637258	Background
CID44041_TTGCGTCCAGTACACT	-0.0879026	Background
CID44041_TTGGCAATCGACCAGC	-0.0775384	Background
CID44041_TTTATGCCACTTGGAT	-0.0545938	Background
CID44041_AGTTGGTTCAAACCAC	-0.0866611	Background
CID44041_ATTTCTGAGTCGATAA	-0.0748262	Background
CID44041_CATATTCTCACCGTAA	-0.0733416	Background
CID44041_CATCAAGAGGCTAGGT	-0.0703275	Background
CID44041_CGAACATCAAGAAAGG	-0.0632562	Background
CID44041_ATTGGTGAGTATTGGA	-0.0882764	Background
CID44041_CTGCCTACAACCGCCA	-0.0813351	Background
CID44041_AACTGGTGTAAGTGGC	-0.0881362	Background
CID44041_ACGGAGAAGTCCAGGA	-0.0880742	Background
CID44041_ACGTCAAGTAGAAAGG	-0.0849885	Background
CID44041_CACACTCGTCCGTGAC	-0.0833604	Background
CID44041_CACAGTATCTGTTTGT	-0.0831365	Background
CID44041_CATCGGGTCCGTTGCT	-0.0878855	Background
CID44041_CCACTACGTACTTCTT	-0.0829678	Background
CID44041_CGAGAAGTCGGTGTCG	-0.0852427	Background
CID44041_CGTAGGCCAGTAGAGC	-0.0715411	Background
CID44041_CTAATGGTCGGCGCTA	-0.0827148	Background
CID44041_CTCTACGCATTAGGCT	-0.0866172	Background
CID44041_CTTCTCTGTCGACTAT	-0.0739765	Background
CID44041_GATCGCGCATAGACTC	-0.0800914	Background
CID44041_GCGACCATCGTTTAGG	-0.0847014	Background
CID44041_GCTGCTTCAGGGCATA	-0.0877295	Background
CID44041_GCTTCCAAGAGTTGGC	-0.0887023	Background
CID44041_TTGGCAAGTAAACCTC	-0.0874459	Background
CID44041_CAACCAACAGGGTACA	-0.0864862	Background
CID44041_CTGCTGTTCCTGCAGG	-0.0877848	Background
CID44041_CGATGTAGTGGCGAAT	-0.0876852	Background
CID44041_AGATTGCCACAACGCC	-0.0873065	Background
CID44041_CACACTCAGGTGCTTT	-0.00773222	Background
CID44041_CGACTTCAGGGAACGG	-0.0885215	Background
CID44041_TCACAAGGTAGAAGGA	-0.0858999	Background
CID44041_GAACCTACAAGGACTG	-0.0853864	Background
CID44041_CGCGTTTAGCTGAACG	-0.0886755	Background
CID44041_AAACGGGAGAGAGCTC	-0.0795617	Background
CID44041_AACGTTGAGAACAATC	-0.0870556	Background
CID44041_ACGATACAGTCTTGCA	-0.0620817	Background
CID44041_AGCAGCCGTCCGCTGA	-0.0736501	Background
CID44041_CATATGGCATCCGCGA	-0.0697748	Background
CID44041_CGACCTTGTGTCCTCT	-0.0871054	Background
CID44041_CGCGGTAAGCTAACAA	-0.0853568	Background
CID44041_GCATGTACACCAGGTC	-0.0851799	Background
CID44041_TACCTTAAGAGGTTGC	-0.089052	Background
CID44041_TATCTCATCACGCATA	-0.0761346	Background
CID44041_TTTGCGCGTGAGGGTT	-0.0879212	Background
CID44041_CCTTTCTGTGTTTGGT	-0.0791265	Background
CID44041_TTGTAGGAGCGTTCCG	-0.0766863	Background
CID44041_AAAGATGTCTCAAGTG	-0.0795823	Background
CID44041_CGAGAAGGTCCCGACA	-0.0890054	Background
CID44041_TAAACCGGTCATTAGC	-0.0853204	Background
CID44041_ACTGAACCACAGCGTC	-0.0885984	Background
CID44041_AGCCTAAGTGCAACTT	-0.0864142	Background
CID44041_AGGCCGTCATTGTGCA	-0.0883856	Background
CID44041_CAGCCGAAGTGCGTGA	-0.0835402	Background
CID44041_CGACCTTGTCAGCTAT	-0.0881905	Background
CID44041_CTCATTACAATCACAC	-0.087656	Background
CID44041_GTATTCTAGCACCGTC	-0.0833816	Background
CID44041_TCTCATAAGGAGTACC	-0.0869723	Background
CID44041_TGGTTAGAGGCTCAGA	-0.0886508	Background
CID44041_TTCTACACACATTCGA	-0.0888232	Background
CID44041_TTGAACGGTGAAATCA	-0.0884473	Background
CID44041_CTCATTAGTTGGGACA	-0.0886934	Background
CID44041_GAACCTATCGGTCTAA	-0.0875002	Background
CID44041_TACAGTGTCAGTACGT	-0.0882571	Background
CID44041_GCCTCTAGTAAGCACG	-0.0889945	Background
CID44041_TGATTTCCAAACGTGG	-0.0861781	Background
CID44041_GACTAACTCTGACCTC	-0.0868228	Background
CID44041_GATGAGGTCACGATGT	-0.0821202	Background
CID44041_TATCTCACACGTCAGC	-0.0836781	Background
CID44041_AAGCCGCCAACTTGAC	-0.0865965	Background
CID44041_CTAGTGATCTCCCTGA	-0.0836672	Background
CID44041_TGCCCTAAGTCTCCTC	-0.0877949	Background
CID44041_ACGTCAATCACGGTTA	-0.0847266	Background
CID44041_CTTAGGATCCCTGACT	-0.0777452	Background
CID44041_ATCCGAACAAAGCGGT	-0.0743082	Background
CID44041_CGATGGCGTCTGGAGA	-0.080979	Background
CID44041_GGGAGATGTAGCCTCG	-0.0768897	Background
CID44041_CATCGAACATTATCTC	-0.0872592	Background
CID44041_GATCGTACACCATGTA	-0.0873916	Background
CID44041_AAGTCTGGTTCAGACT	-0.0883072	Background
CID44041_CGGGTCAGTCCATGAT	-0.0860983	Background
CID44041_GGCCGATGTTAAGATG	-0.0653212	Background
CID44041_TCGGGACTCCGATATG	-0.0633742	Background
CID44041_CCCATACGTACAGTTC	-0.0854298	Background
CID44041_GTAGGCCTCATACGGT	-0.0700941	Background
CID44041_CCTCAGTCAGATAATG	-0.0798319	Background
CID44041_GGTATTGGTACCATCA	-0.0733845	Background
CID44041_TAGCCGGCAATCGGTT	-0.0643696	Background
CID44041_TGCTGCTGTTAAAGTG	-0.0853565	Background
CID44041_ACATCAGCATCAGTCA	-0.0885188	Background
CID44041_TGAGAGGGTTTGGCGC	-0.0792865	Background
CID44041_CCGTTCAAGTGGGATC	-0.0348698	Background
CID44041_CACACCTTCGTGTAGT	-0.0735869	Background
CID44041_CTGCTGTTCGGTTAAC	-0.0700452	Background
CID44041_GCATGATGTTCCCTTG	-0.0972065	Background
CID44041_GTGAAGGTCGGAAACG	-0.0832283	Background
CID44041_TCAGGATTCGTACCGG	-0.0570926	Background
CID44041_TCTCTAACAGTACACT	-0.0496124	Background
CID44041_CATCGGGTCCGTCATC	-0.0519681	Background
CID44041_CTAGAGTGTCATATCG	-0.0879289	Background
CID44041_GCTGCTTTCAGAGCTT	-0.078112	Background
CID44041_GGACGTCGTATAGGTA	-0.0875941	Background
CID44041_GGTGTTAAGGTTACCT	-0.0904889	Background
CID44041_TGGTTCCTCAGAAATG	-0.0796197	Background
CID44041_AGACGTTTCGTTTAGG	-0.061356	Background
CID44041_CAGCGACTCTACGAGT	-0.0879077	Background
CID44041_GCTGCGAGTTGTGGAG	-0.077133	Background
CID44041_TGACTAGGTGACCAAG	-0.0873147	Background
CID44041_TTGGCAATCGTCTGCT	-0.0885977	Background
CID44041_CAAGATCAGCAGACTG	-0.074935	Background
CID44041_CCGTACTAGCAGATCG	-0.0755683	Background
CID44041_CTGTTTAAGGCTAGCA	-0.0879049	Background
CID44041_GCATGCGCAACTGGCC	-0.087414	Background
CID44041_GCGCAGTTCTAACTTC	-0.0803418	Background
CID44041_AACGTTGAGTTTAGGA	-0.0886454	Background
CID44041_TGGGAAGCATGGAATA	-0.0789798	Background
CID44041_GCTGCGAAGGGTCTCC	-0.08833	Background
CID44041_GTGTTAGGTTCTGGTA	-0.0790686	Background
CID44041_CCTCAGTAGGGCACTA	-0.0887657	Background
CID44041_CTGATAGAGCTAGTTC	-0.0768617	Background
CID44041_GCTTCCATCACAGGCC	-0.0880347	Background
CID44041_TTCTCAACAAGACACG	-0.069796	Background
CID44041_CGGACTGTCCTCAATT	-0.0755	Background
CID44041_GTCGGGTCAGGCTGAA	-0.0789476	Background
CID44041_TTTACTGAGACCTTTG	-0.0756134	Background
CID44041_CCACTACTCGGTCTAA	-0.0887983	Background
CID44041_ACACCCTGTTCCACTC	-0.0843815	Background
CID44041_ACCGTAACAAGAGTCG	-0.0887716	Background
CID44041_CCGTTCATCCGCATCT	-0.0870439	Background
CID44041_TATTACCCACTAGTAC	-0.08821	Background
CID44041_AGCGGTCGTTATGCGT	-0.0884189	Background
CID44041_CACACAACAGCGAACA	-0.0854947	Background
CID44041_TCAACGAGTCTCTTAT	-0.0868912	Background
CID44041_ACGCCAGCAAATCCGT	-0.0882961	Background
CID44041_AGAATAGTCCTTAATC	-0.0854344	Background
CID44041_ATAACGCTCATGGTCA	-0.0790151	Background
CID44041_GACCTGGCAATAGAGT	-0.0875212	Background
CID44041_TCGTAGATCTACTTAC	-0.0654696	Background
CID44041_GTCTCGTTCGAGAACG	-0.0711354	Background
CID44041_ACGAGCCGTCCTCTTG	-0.0876969	Background
CID44041_GGAAAGCTCCGTACAA	-0.0884685	Background
CID44041_GTTCATTCAGACGCAA	-0.0858675	Background
CID44041_AAAGTAGCATTACGAC	-0.0857885	Background
CID44041_AGCCTAAGTATGAAAC	-0.0762629	Background
CID44041_AGCGTCGGTTACGCGC	-0.0798467	Background
CID44041_AGCTTGACAACTGGCC	-0.0867558	Background
CID44041_AGGGAGTGTGCACTTA	-0.0818461	Background
CID44041_CACCAGGCACATGACT	-0.075708	Background
CID44041_CAGAGAGTCCGAATGT	-0.0879234	Background
CID44041_CCATGTCAGCGTAATA	-0.0880517	Background
CID44041_CCGGTAGTCGGAGGTA	-0.0878343	Background
CID44041_CCTTTCTTCGCGTAGC	-0.0840706	Background
CID44041_CGACCTTAGACAGACC	-0.0850721	Background
CID44041_CGACTTCCAGTAAGCG	-0.076808	Background
CID44041_CGAGCACAGCATCATC	-0.0885099	Background
CID44041_CGGCTAGTCTTTACGT	-0.0842097	Background
CID44041_CTCGAGGCATCGATTG	-0.0860805	Background
CID44041_CTTTGCGGTCAAAGAT	-0.0879153	Background
CID44041_GCACTCTGTGGTCCGT	-0.083714	Background
CID44041_GCGAGAAGTCTTTCAT	-0.0821575	Background
CID44041_GCTGGGTCAAGTCTGT	-0.0885676	Background
CID44041_GTCACAAAGTACCGGA	-0.0848257	Background
CID44041_GTCTCGTCAAGCCCAC	-0.0880361	Background
CID44041_TGCCAAACAAGTACCT	-0.0769024	Background
CID44041_TGCCCTACAATGAAAC	-0.0872685	Background
CID44041_TGCGCAGGTTAAAGTG	-0.0889302	Background
CID44041_TGTATTCTCGATGAGG	-0.0836304	Background
CID44041_TTGTAGGTCTCTGAGA	-0.0853138	Background
CID44041_AGCTTGAGTCCCTACT	-0.0888545	Background
CID44041_GCATACAGTGTATGGG	-0.0858547	Background
CID44041_GTCCTCAAGCACAGGT	-0.0882072	Background
CID44041_TAGAGCTAGGATCGCA	-0.0834269	Background
CID44041_TCGAGGCAGAATCTCC	-0.0886174	Background
CID44041_AGCTCTCTCACCGGGT	-0.0886167	Background
CID44041_AGTGTCAGTCAACTGT	-0.0814971	Background
CID44041_CATGCCTCATTTCAGG	-0.087645	Background
CID44041_GTTCTCGAGGCTAGGT	-0.0782005	Background
CID44041_TGACGGCCAGCTATTG	-0.0822049	Background
CID44041_TGGCCAGGTCTTGTCC	-0.0768264	Background
CID44041_CTACATTTCTCCGGTT	-0.0853085	Background
CID44041_GTACTTTTCGCCGTGA	-0.0844267	Background
CID44041_ACTTACTAGTCAATAG	-0.0808668	Background
CID44041_AGAGTGGTCGCAAGCC	-0.0867064	Background
CID44041_AGCAGCCGTCACCCAG	-0.0881906	Background
CID44041_ATAACGCCAGACAAGC	-0.0882879	Background
CID44041_CACAGTATCACATACG	-0.0832393	Background
CID44041_CATTATCCAATCCGAT	-0.0877867	Background
CID44041_CATTCGCCAGTACACT	-0.088645	Background
CID44041_CCCAATCCAAGGCTCC	-0.0879173	Background
CID44041_CTCTGGTGTAAATGAC	-0.0877733	Background
CID44041_GACTGCGAGTACGACG	-0.0879907	Background
CID44041_GGACAAGAGATCCTGT	-0.0881472	Background
CID44041_GGATGTTCACATGTGT	-0.0860524	Background
CID44041_GGTGCGTAGAGCTGCA	-0.0822994	Background
CID44041_GTAACTGAGACAAAGG	-0.0884123	Background
CID44041_GTAACTGCAACGCACC	-0.0871165	Background
CID44041_GTAGGCCGTCTTGATG	-0.0875929	Background
CID44041_TCAATCTTCCGTCATC	-0.0861973	Background
CID44041_TCACAAGAGGCTCAGA	-0.0880292	Background
CID44041_TCACGAAAGGCCCTTG	-0.0887401	Background
CID44041_TCAGCTCGTAGATTAG	-0.0884014	Background
CID44041_TCGGGACAGCAATATG	-0.0889176	Background
CID44041_TCTGGAAGTCATATGC	-0.0874332	Background
CID44041_TGAAAGACACGCTTTC	-0.0858043	Background
CID44041_TGAGAGGGTTATCACG	-0.081181	Background
CID44041_TTATGCTTCTCGATGA	-0.0865588	Background
CID44041_TTGACTTGTAGCCTAT	-0.0881947	Background
CID44041_TTTGCGCGTTCCGGCA	-0.0838749	Background
CID44041_AATCGGTTCCAGAGGA	-0.0742212	Background
CID44041_CAGCTAAGTCTTGTCC	-0.0882782	Background
CID44041_CATCGGGCATAGTAAG	-0.0863888	Background
CID44041_CATGACAGTCAAAGCG	-0.0858453	Background
CID44041_CGTTCTGGTCAACTGT	-0.0796444	Background
CID44041_CTGCCTATCTGTTGAG	-0.0885302	Background
CID44041_GTTAAGCGTTAAGACA	-0.0887176	Background
CID44041_CTCATTACATCCGGGT	-0.0889995	Background
CID44041_AGGTCCGCACGAGAGT	-0.0878528	Background
CID44041_GCTGCTTCATTCTCAT	-0.0757188	Background
CID44041_TGCCAAAGTTGTACAC	-0.0848638	Background
CID44041_TGTATTCCAGACGCTC	-0.078653	Background
CID44041_CCTTTCTCAGCCTTTC	-0.0766681	Background
CID44041_GACGTGCTCTCTGCTG	-0.0869741	Background
CID44041_GTTTCTACAGCCTGTG	-0.0876793	Background
CID44041_GCTGCGAAGAGCCTAG	-0.0645847	Background
CID44041_GGCGTGTCAATGAAAC	-0.087144	Background
CID44041_TCGGTAAGTGTGAATA	-0.0820041	Background
CID44041_CATGGCGAGATCTGAA	-0.0874493	Background
CID44041_TTTGTCACAATGGATA	-0.0822801	Background
CID44041_AGCGTCGGTTTAGGAA	-0.0887843	Background
CID44041_GAGCAGAGTGGCCCTA	-0.0810449	Background
CID44041_TATCAGGGTAAAGGAG	-0.0865911	Background
CID44041_TGCCCATAGGCCCGTT	-0.0881804	Background
CID44041_CTTAACTTCGGATGGA	-0.0788174	Background
CID44041_AACTCCCCATCTCCCA	-0.0841261	Background
CID44041_AAGGTTCAGGCAGGTT	-0.0890112	Background
CID44041_ACGATACGTTACGTCA	-0.0891568	Background
CID44041_ACGGGCTGTGAAAGAG	-0.0850837	Background
CID44041_ACTATCTTCCCTTGCA	-0.0888398	Background
CID44041_ACTTTCAAGAAACGCC	-0.0871907	Background
CID44041_ACTTTCATCTAGAGTC	-0.0805482	Background
CID44041_AGCAGCCGTAGCGATG	-0.0828155	Background
CID44041_AGGGAGTTCGTGGGAA	-0.08862	Background
CID44041_AGGGTGACATCGGACC	-0.0889298	Background
CID44041_AGTAGTCAGAGAGCTC	-0.0855275	Background
CID44041_ATAACGCTCTGCCCTA	-0.0743334	Background
CID44041_ATCACGACACAAGACG	-0.0707016	Background
CID44041_ATCCACCTCACATACG	-0.0827795	Background
CID44041_ATCCACCTCAGTGCAT	-0.0868183	Background
CID44041_ATTATCCTCCTCCTAG	-0.0876322	Background
CID44041_CACATAGTCAGCGACC	-0.0880945	Background
CID44041_CAGCCGACATGTCGAT	-0.0782302	Background
CID44041_CAGGTGCCATCGGTTA	-0.0869216	Background
CID44041_CATCAAGAGACTTGAA	-0.0887822	Background
CID44041_CATGACATCAACACGT	-0.089012	Background
CID44041_CGGACTGGTAAATGTG	-0.083816	Background
CID44041_CGGAGCTGTGATGTCT	-0.087416	Background
CID44041_CGTCTACCAGTGGAGT	-0.0880622	Background
CID44041_CGTGAGCCATATGAGA	-0.0878022	Background
CID44041_CTGCTGTCACGTTGGC	-0.0866011	Background
CID44041_GAACGGACATACTACG	-0.0880967	Background
CID44041_GAATAAGTCTTGCCGT	-0.0839961	Background
CID44041_GACAGAGCAATACGCT	-0.0874811	Background
CID44041_GACGCGTAGTACGATA	-0.085535	Background
CID44041_GATGAGGTCAGTTCGA	-0.0883002	Background
CID44041_GCACTCTAGTTCCACA	-0.0834047	Background
CID44041_GCGCCAATCTACCTGC	-0.087599	Background
CID44041_GGCTCGAGTGAAATCA	-0.0851963	Background
CID44041_GGGAGATGTTTGTGTG	-0.0890951	Background
CID44041_GGTGTTAAGGGTCTCC	-0.0834339	Background
CID44041_GTAACGTAGTTGCAGG	-0.0885101	Background
CID44041_TACCTTACACTGTCGG	-0.0882414	Background
CID44041_TCGGGACTCGTCTGAA	-0.0886408	Background
CID44041_TGAAAGAAGGAGTTTA	-0.0709717	Background
CID44041_TGCCAAATCAGCATGT	-0.0669734	Background
CID44041_TGCGGGTTCGTCCAGG	-0.0878922	Background
CID44041_TGGCTGGCAGCTGTGC	-0.00438092	Background
CID44041_TTAGGCACATGGTAGG	-0.0885514	Background
CID44041_TTGTAGGCAGCTCGAC	-0.0887739	Background
CID44041_AACCATGAGCCAACAG	-0.0846778	Background
CID44041_AACCATGCATGAGCGA	-0.0888896	Background
CID44041_AAGGAGCGTACGAAAT	-0.0878868	Background
CID44041_ACAGCCGTCTGTACGA	-0.086878	Background
CID44041_ACGATACCATGCAATC	-0.0843539	Background
CID44041_ACGCCGATCAACCAAC	-0.0865361	Background
CID44041_ACTGAACAGTGTACTC	-0.0854194	Background
CID44041_AGAGCTTCAAAGGAAG	-0.0884801	Background
CID44041_AGCATACGTGGTGTAG	-0.0863619	Background
CID44041_ATAGACCAGCCGGTAA	-0.0842981	Background
CID44041_ATCGAGTGTTCCCGAG	-0.0856701	Background
CID44041_CAAGATCTCCGTTGCT	-0.0886166	Background
CID44041_CACAAACAGTGTGGCA	-0.079443	Background
CID44041_CAGATCAGTGCACTTA	-0.0820207	Background
CID44041_CAGCGACAGGTTCCTA	-0.0888756	Background
CID44041_CATATGGAGTTAGCGG	-0.0869419	Background
CID44041_CATCCACCAATGGATA	-0.0883867	Background
CID44041_CATGACAAGACTAAGT	-0.0891505	Background
CID44041_CCACGGAAGGGAGTAA	-0.0837015	Background
CID44041_CCACTACAGAAGGCCT	-0.0888533	Background
CID44041_CCTACCACAGATCGGA	-0.08675	Background
CID44041_CCTCAGTTCCAGGGCT	-0.0825683	Background
CID44041_CGAATGTTCAAAGACA	-0.0814779	Background
CID44041_CGAGCCAGTCAATACC	-0.0836337	Background
CID44041_CGCTATCTCTGTTGAG	-0.0822779	Background
CID44041_CGTAGGCGTGAAGGCT	-0.0886889	Background
CID44041_CGTCCATGTCATTAGC	-0.0812687	Background
CID44041_CTCCTAGGTACGCTGC	-0.0797182	Background
CID44041_CTTCTCTGTCTAAACC	-0.0753297	Background
CID44041_GACGTGCCAAAGCGGT	-0.0829593	Background
CID44041_GTACTTTTCTGCCAGG	-0.0887037	Background
CID44041_GTCGGGTCACATGACT	-0.0884227	Background
CID44041_GTGGGTCGTCGCGGTT	-0.0872362	Background
CID44041_TACCTTACAGTTCCCT	-0.0829915	Background
CID44041_TGCGGGTGTCGCTTCT	-0.0840915	Background
CID44041_TGGCGCAGTCTGCCAG	-0.0882936	Background
CID44041_TGTTCCGTCTTAGCCC	-0.0859134	Background
CID44041_TTGGCAAGTACTCAAC	-0.0837058	Background
CID44041_TTTGTCACACATCTTT	-0.0887562	Background
CID44041_ACGCCGAGTTAGAACA	-0.088733	Background
CID44041_ACTTGTTTCGTCCAGG	-0.0885384	Background
CID44041_ATCTACTGTCGGCATC	-0.0842397	Background
CID44041_GAACGGACACGAGAGT	-0.0882981	Background
CID44041_GTGCAGCAGACACTAA	-0.0850076	Background
CID44041_TAGAGCTTCAGCTTAG	-0.0866459	Background
CID44041_TGAGGGAAGATCCCGC	-0.0862609	Background
CID44041_ATTCTACAGCTAGGCA	-0.0871632	Background
CID44041_CTAAGACGTATATCCG	-0.0846706	Background
CID44041_GGATTACAGAGTGACC	-0.0651159	Background
CID44041_TCTCATAAGCCACGTC	-0.0888376	Background
CID44041_CCGGGATCAATGGAAT	-0.0887049	Background
CID44041_ACACTGAGTAAACACA	-0.0880352	Background
CID44041_CATCCACGTCGACTGC	-0.0824736	Background
CID44041_CGCTGGAAGTTGAGTA	-0.0783193	Background
CID44041_CGGACGTGTACTTCTT	-0.0868288	Background
CID44041_CTAACTTCACTGTGTA	-0.0826689	Background
CID44041_GGGAGATTCAAGGCTT	-0.0886244	Background
CID44041_TAAGTGCTCGGTGTCG	-0.0880416	Background
CID44041_TGGTTAGAGGCCGAAT	-0.0889085	Background
CID44041_CGATCGGAGAATGTGT	-0.0870889	Background
CID44041_AAACCTGCAAGACACG	-0.0765399	Background
CID44041_AAAGCAAGTCATACTG	-0.0919346	Background
CID44041_AACCATGTCGGCGCAT	-0.0928531	Background
CID44041_AATCCAGTCTCGTATT	-0.0961895	Background
CID44041_ACATACGGTTAAGTAG	-0.0860756	Background
CID44041_ACCTTTACAAGTCTGT	-0.0941566	Background
CID44041_ACGAGCCCACAGGTTT	-0.0644075	Background
CID44041_ACGGAGAAGGTAAACT	-0.0548398	Background
CID44041_ACGGGCTAGGTTACCT	-0.0870829	Background
CID44041_AGCGTATGTACTTCTT	-0.0915821	Background
CID44041_AGGCCGTTCAGATAAG	-0.0865535	Background
CID44041_AGGTCATAGGCCATAG	-0.0874739	Background
CID44041_ATGGGAGCACAACGTT	-0.0912708	Background
CID44041_CAAGGCCCAGTAAGCG	-0.0921011	Background
CID44041_CACTCCAAGCATGGCA	-0.0872938	Background
CID44041_CAGAATCCATCCGTGG	-0.0869292	Background
CID44041_CAGCGACTCATGTCCC	-0.0844665	Background
CID44041_CATCGAAGTTCCAACA	-0.0881336	Background
CID44041_CCATTCGGTGGGTATG	-0.0866576	Background
CID44041_CCTACCAAGAATGTGT	-0.0863084	Background
CID44041_CGACCTTTCTCCCTGA	-0.0672028	Background
CID44041_CGAGCCACAAAGGTGC	-0.0875534	Background
CID44041_CGGAGCTTCATCACCC	-0.0932983	Background
CID44041_CGGAGTCAGATCCGAG	-0.0892789	Background
CID44041_CGTAGCGCACCGATAT	-0.0872063	Background
CID44041_CGTTCTGGTTATGCGT	-0.0884773	Background
CID44041_CTACCCAAGTGCTGCC	-0.0872464	Background
CID44041_CTACGTCGTGTTCTTT	-0.0935616	Background
CID44041_CTCATTACACTGTCGG	-0.0892244	Background
CID44041_CTCGAAACAAGCTGAG	-0.0877165	Background
CID44041_CTCGGGACAAGAGTCG	-0.0872603	Background
CID44041_CTGTGCTAGCTGTCTA	-0.0844201	Background
CID44041_GACCTGGGTCATATGC	-0.0853871	Background
CID44041_GATTCAGCAGCCTTTC	-0.0872763	Background
CID44041_GCAATCATCGTCCAGG	-0.086882	Background
CID44041_GCATGCGTCCCGGATG	-0.0894786	Background
CID44041_GCGCAACTCTTGAGAC	-0.0874621	Background
CID44041_GCGGGTTTCATCTGTT	-0.095072	Background
CID44041_GCTCCTACACAGACAG	-0.0726868	Background
CID44041_GCTGGGTAGATAGCAT	-0.0865115	Background
CID44041_GGACAAGAGTTACCCA	-0.0899754	Background
CID44041_GGACGTCTCGATAGAA	-0.0916271	Background
CID44041_GGCGACTAGAGCTGGT	-0.087614	Background
CID44041_GTCGTAATCTCTTATG	-0.0882859	Background
CID44041_GTTACAGAGTCATGCT	-0.0889544	Background
CID44041_GTTTCTAGTACTCTCC	-0.0872105	Background
CID44041_TACAGTGCAATGGAGC	-0.0923917	Background
CID44041_TACTCGCTCAGGATCT	-0.087537	Background
CID44041_TATGCCCGTAGCGTAG	-0.0871893	Background
CID44041_TCAACGAGTCACTGGC	-0.0880641	Background
CID44041_TCTGAGAAGGAATGGA	-0.0904202	Background
CID44041_TGACGGCAGAATGTTG	-0.0874807	Background
CID44041_TGAGCATGTAGTGAAT	-0.0896767	Background
CID44041_TGAGCCGTCAACACCA	-0.0880502	Background
CID44041_TGCACCTAGAAGGTGA	-0.0874451	Background
CID44041_TGGGAAGCATAGACTC	-0.0869691	Background
CID44041_TGGTTCCCACATGTGT	-0.0868994	Background
CID44041_TGTCCCAAGAAAGTGG	-0.0892581	Background
CID44041_TTAGTTCCATCTACGA	-0.0771628	Background
CID44041_TTGGAACCATATGGTC	-0.088084	Background
CID44041_TTGGAACTCGGCCGAT	-0.0898875	Background
CID44041_TTTACTGCAGACGCCT	-0.0882532	Background
CID44041_CTCGAGGCACAAGTAA	-0.0924006	Background
CID44041_TGGCGCATCGCAAGCC	-0.0935908	Background
CID44041_TGTATTCGTTCAACCA	-0.0934496	Background
CID44041_ACTGAACCATAACCTG	-0.0879246	Background
CID44041_AAATGCCTCTGCTTGC	-0.0866182	Background
CID44041_ATCCACCAGAATGTTG	-0.0901925	Background
CID44041_CATCAAGGTAAACACA	-0.0946529	Background
CID44041_TAGTTGGCATGCCTTC	-0.0846064	Background
CID44041_TGAGAGGCATGTTGAC	-0.0813307	Background
CID44041_AAACCTGAGGCTACGA	-0.0860723	Background
CID44041_AACTCCCCACACTGCG	-0.0855366	Background
CID44041_ACCCACTGTCGACTGC	-0.093918	Background
CID44041_ACGGGCTCACAGATTC	-0.0882858	Background
CID44041_AGCTCTCTCCAAACAC	-0.0878871	Background
CID44041_AGCTTGATCCATGAGT	-0.0912387	Background
CID44041_CAGCAGCGTCGCATAT	-0.0871954	Background
CID44041_CATATTCGTGATAAGT	-0.0915523	Background
CID44041_CATCCACGTTCGCGAC	-0.0909627	Background
CID44041_CCGGTAGCACGGTAAG	-0.0705965	Background
CID44041_CGCTTCATCTGCCCTA	-0.0922864	Background
CID44041_GGGTTGCAGAAAGTGG	-0.0890532	Background
CID44041_GTCGGGTTCTCGTATT	-0.0961572	Background
CID44041_TAGAGCTAGGTAAACT	-0.0897399	Background
CID44041_TGCGCAGTCAGCATGT	-0.0873547	Background
CID44041_TGGGAAGTCTGCAAGT	-0.0437725	Background
CID44041_TTAGGCAGTTGCGTTA	-0.0877191	Background
CID44041_TTCTCCTTCTACCAGA	-0.0921984	Background
CID44041_CTTACCGCATCAGTCA	-0.0768124	Background
CID44041_CACCAGGTCCATGAGT	-0.0864849	Background
CID44041_TGCCCATCACCGAATT	-0.082895	Background
CID44041_AAGCCGCGTAGTACCT	-0.0952068	Background
CID44041_ACGAGGACACCTATCC	-0.0876987	Background
CID44041_ACTTGTTCAATCGAAA	-0.0907253	Background
CID44041_ACTTTCAGTCATGCAT	-0.0872918	Background
CID44041_CCTAAAGAGTCCCACG	-0.0885182	Background
CID44041_CTAAGACAGTGGAGAA	-0.0841751	Background
CID44041_GACCAATTCAACCATG	-0.0886832	Background
CID44041_GTTACAGAGGCTACGA	-0.0183004	Background
CID44041_TGAGCATAGCCCAGCT	-0.0863373	Background
CID44041_AACTCAGCACATGGGA	-0.087776	Background
CID44041_ACCTTTAGTACCGTTA	-0.0869026	Background
CID44041_ACTTTCATCCGCGCAA	-0.0856211	Background
CID44041_AGCATACAGATCCCGC	-0.0905505	Background
CID44041_AGCATACCATGGATGG	-0.0877286	Background
CID44041_AGCTCCTAGAGCTGGT	-0.0871775	Background
CID44041_AGCTCCTTCGCCGTGA	-0.0623467	Background
CID44041_AGGTCATGTCCGAACC	-0.0879937	Background
CID44041_AGTGTCATCTGGAGCC	-0.00472145	Background
CID44041_CAACCAACAGGACGTA	-0.0880839	Background
CID44041_CAGATCAAGTAACCCT	-0.0870995	Background
CID44041_CCACCTAAGTTGTAGA	-0.0868586	Background
CID44041_CGGAGTCAGAGCCCAA	-0.0737553	Background
CID44041_GACTGCGAGCTGGAAC	-0.0891296	Background
CID44041_GATCAGTGTAGCTCCG	-0.0874738	Background
CID44041_GCTTCCACATGCGCAC	-0.0857288	Background
CID44041_GTAACTGTCGAACTGT	-0.0874825	Background
CID44041_GTATTCTCATCAGTCA	-0.0843885	Background
CID44041_GTGGGTCTCTCTGTCG	-0.082682	Background
CID44041_GTTCTCGGTGACGGTA	-0.0866252	Background
CID44041_TATCTCAGTCGAGATG	-0.0853691	Background
CID44041_TCGCGAGCAGTTCATG	-0.0861037	Background
CID44041_TCGTACCGTAAATGTG	-0.0879784	Background
CID44041_TCTGAGACAGACGCTC	-0.0881676	Background
CID44041_TCTTCGGCACCCATTC	0.163996	Background
CID44041_TGGCCAGAGGCTAGAC	-0.0879139	Background
CID44041_TGGTTAGCACCGCTAG	-0.0889947	Background
CID44041_CAAGAAACAATGAAAC	-0.13193	Background
CID44041_AAGTCTGAGGGCTCTC	-0.090385	Background
CID44041_ACGATGTAGGATATAC	-0.0906209	Background
CID44041_CGAGAAGCAGGGATTG	-0.086355	Background
CID44041_CGTTGGGGTCTAGTCA	-0.099313	Background
CID44041_GGGAGATTCAGCATGT	-0.0856763	Background
CID44041_ACGAGCCGTCCAAGTT	-0.291869	Background
CID44041_AGCTCCTCAGCGTCCA	-0.179008	Background
CID44041_AGGCCGTAGGTGATTA	-0.241846	Background
CID44041_AGTTGGTCAGCGATCC	-0.221361	Background
CID44041_ATCTGCCGTGACAAAT	-0.335566	Background
CID44041_CAAGATCTCGCAAACT	0.0162556	Background
CID44041_CAGAATCCAGGGAGAG	-0.259889	Background
CID44041_CATCGAAGTTTAGCTG	-0.17089	Background
CID44041_CATTCGCAGGTGGGTT	-0.168425	Background
CID44041_CCTCAGTCACGCGAAA	-0.083521	Background
CID44041_CCTCTGAAGTGTTAGA	-0.215965	Background
CID44041_GACTGCGCACCATGTA	-0.0840813	Background
CID44041_GATGAAAAGCTGATAA	-0.199415	Background
CID44041_GCTGCAGAGTATTGGA	-0.242083	Background
CID44041_GCTGCAGGTGGTAACG	-0.25239	Background
CID44041_GGAACTTGTCGCCATG	-0.196707	Background
CID44041_GGATGTTAGCCTATGT	-0.288045	Background
CID44041_GGCAATTTCGACAGCC	-0.203662	Background
CID44041_GGGCACTCATCACGTA	0.0147957	Background
CID44041_GTGCAGCCAGGCGATA	-0.0854985	Background
CID44041_GTTTCTAAGTCTCCTC	-0.0501094	Background
CID44041_TCAGGTAGTTCTGTTT	-0.1951	Background
CID44041_TCATTTGTCACCGTAA	-0.160599	Background
CID44041_TCGCGTTCACCGATAT	-0.0747577	Background
CID44041_TCTGAGATCAGTTAGC	-0.214479	Background
CID44041_TTATGCTAGTACGCCC	-0.198454	Background
CID44041_TTGGCAAGTAAAGGAG	-0.299632	Background
CID44041_TTGTAGGAGAGTTGGC	-0.225442	Background
CID44041_AAACCTGCATGAACCT	-0.198016	Background
CID44041_AACGTTGAGCTACCTA	-0.218391	Background
CID44041_AACTCAGCAGGGATTG	-0.0483412	Background
CID44041_AACTCTTGTTCCGTCT	-0.064425	Background
CID44041_AAGGAGCTCGGCCGAT	0.00195879	Background
CID44041_AAGGCAGAGCTCCCAG	-0.1926	Background
CID44041_ACGGGTCAGTAACCCT	-0.0718776	Background
CID44041_ACGGGTCCAACACGCC	-0.0652664	Background
CID44041_ACTGAACTCCTTTACA	-0.282972	Background
CID44041_ACTGATGAGTGGGATC	-0.25721	Background
CID44041_ACTGCTCAGATAGGAG	-0.223639	Background
CID44041_AGCAGCCAGAAAGTGG	-0.0825688	Background
CID44041_AGGTCATCACCTTGTC	-0.155097	Background
CID44041_ATAACGCAGATCCTGT	-0.234429	Background
CID44041_ATGGGAGGTAGCGTGA	-0.287599	Background
CID44041_ATTTCTGAGAAGAAGC	-0.124067	Background
CID44041_CAACCAATCTTCCTTC	-0.229815	Background
CID44041_CAACCTCCAGCGTAAG	-0.103842	Background
CID44041_CAAGATCTCTGACCTC	-0.123236	Background
CID44041_CACATAGTCTGGTGTA	-0.0388495	Background
CID44041_CACCTTGTCTTCGAGA	-0.100399	Background
CID44041_CAGAATCAGGGTCTCC	-0.0180664	Background
CID44041_CAGCATATCCAATGGT	-0.137976	Background
CID44041_CATATTCCATGCCCGA	-0.0160112	Background
CID44041_CCACCTAGTCAACTGT	-0.235132	Background
CID44041_CCTCAGTGTTCCGGCA	-0.228637	Background
CID44041_CGAACATGTGTTGAGG	-0.289458	Background
CID44041_CGCGTTTTCCAAATGC	-0.204334	Background
CID44041_CGCTATCGTCGTCTTC	-0.325826	Background
CID44041_CGGCTAGGTGACTACT	-0.187615	Background
CID44041_CTCGAGGGTCAATACC	-0.223682	Background
CID44041_CTGATCCCAGGCGATA	0.0719318	Background
CID44041_CTGCCTAAGCTTTGGT	-0.0831663	Background
CID44041_CTGCTGTGTGTTTGGT	-0.248562	Background
CID44041_CTTAGGATCCAATGGT	-0.261864	Background
CID44041_GCATGCGAGGACAGAA	0.0285748	Background
CID44041_GCTCTGTGTGACTACT	-0.0151316	Background
CID44041_GGACAAGAGTTCGCAT	-0.115669	Background
CID44041_GGACGTCTCCCACTTG	-0.00761496	Background
CID44041_GGCGACTCACAAGCCC	-0.166206	Background
CID44041_GGGAGATTCCTAGGGC	-0.109389	Background
CID44041_GGGCACTGTGTAAGTA	-0.034892	Background
CID44041_GTAACGTGTCTAAACC	0.000337105	Background
CID44041_GTGTTAGAGCGATTCT	-0.184964	Background
CID44041_TAGCCGGTCTGTCAAG	-0.163519	Background
CID44041_TAGTTGGTCTATGTGG	-0.237022	Background
CID44041_TATCTCAAGGCATGGT	-0.165656	Background
CID44041_TCAACGAAGCCACGCT	-0.123176	Background
CID44041_TCGAGGCTCACATACG	-0.107367	Background
CID44041_TCGTACCCACGAAATA	-0.142517	Background
CID44041_TCTGGAAGTCGCGGTT	-0.231984	Background
CID44041_TCTTCGGCAGCTTCGG	-0.258055	Background
CID44041_TGAGGGACAAGGCTCC	-0.169532	Background
CID44041_TGCCCTATCGATCCCT	-0.267665	Background
CID44041_TGCGCAGAGCGAAGGG	-0.172156	Background
CID44041_TGCGTGGCATCACGTA	0.0532645	Background
CID44041_TGCGTGGTCGGCCGAT	0.0136211	Background
CID44041_TGTGGTAGTCTCCCTA	-0.00395028	Background
CID44041_TGTGTTTTCTACTTAC	-0.085538	Background
CID44041_TTCTACATCTGGTTCC	0.0170073	Background
CID44041_TTCTCAACACTGTCGG	-0.111576	Background
CID44041_AAACGGGAGTGTCCCG	-0.278651	Background
CID44041_AGAGTGGGTTACGGAG	-0.237622	Background
CID44041_ATCATCTTCAACGGCC	-0.0059107	Background
CID44041_CTGATCCCAAGCTGTT	-0.319978	Background
CID44041_GTGGGTCGTAACGCGA	-0.0933197	Background
CID44041_GTTACAGCACAGATTC	0.0057088	Background
CID44041_TTTATGCGTAATAGCA	-0.217032	Background
CID44041_AACACGTTCACCTTAT	-0.184005	Background
CID44041_AACGTTGAGTTAGGTA	-0.284491	Background
CID44041_ACAGCCGTCCGTAGTA	-0.205363	Background
CID44041_ACCAGTATCTTTCCTC	-0.062592	Background
CID44041_ACTGTCCCACACAGAG	-0.192335	Background
CID44041_AGCCTAAAGATCGATA	-0.204719	Background
CID44041_AGTGGGACACCCTATC	-0.17728	Background
CID44041_AGTGTCATCGTTGACA	-0.0685001	Background
CID44041_ATAACGCCAAAGCAAT	-0.329182	Background
CID44041_ATCCGAACACCAACCG	-0.0282062	Background
CID44041_ATGTGTGAGATGAGAG	-0.260499	Background
CID44041_CAACCAATCGTCCGTT	-0.0848775	Background
CID44041_CACCTTGGTAATAGCA	-0.138209	Background
CID44041_CAGTCCTGTCACTGGC	-0.124244	Background
CID44041_CAGTCCTGTTCCCGAG	-0.203677	Background
CID44041_CCGTACTCACTTGGAT	-0.193863	Background
CID44041_CCTATTATCTCCAGGG	-0.245064	Background
CID44041_CGGGTCAGTGGACGAT	-0.315619	Background
CID44041_CTAGTGATCTGCTGCT	-0.189744	Background
CID44041_CTCGTACTCGACCAGC	-0.167787	Background
CID44041_CTCTGGTTCTTCATGT	-0.271846	Background
CID44041_CTTCTCTTCCGCATCT	-0.219552	Background
CID44041_GAAATGAAGTGCTGCC	-0.257063	Background
CID44041_GAAGCAGGTGACCAAG	-0.109015	Background
CID44041_GACGTTATCGACCAGC	-0.308425	Background
CID44041_GATCGTATCTCTTATG	-0.203192	Background
CID44041_GCCTCTAAGGCTCAGA	-0.292359	Background
CID44041_GCGCCAACAGGAATGC	-0.00271306	Background
CID44041_GGAACTTCACAGCCCA	0.0127881	Background
CID44041_GGGATGAAGGTGATAT	-0.163845	Background
CID44041_GTACGTACAATCACAC	-0.271499	Background
CID44041_GTGCTTCGTCGAGTTT	-0.257322	Background
CID44041_TAAGTGCTCCAATGGT	-0.163799	Background
CID44041_TACGGGCCATGTTGAC	-0.15889	Background
CID44041_TCAGGTAAGTGAACAT	-0.141485	Background
CID44041_TGCCCATAGCGTTTAC	-0.204009	Background
CID44041_TGCGGGTTCCGCAAGC	-0.16184	Background
CID44041_TGTGTTTAGGATGTAT	-0.190713	Background
CID44041_TTCTTAGAGCTACCGC	-0.273621	Background
CID44041_TTGAACGAGACTAAGT	-0.311033	Background
CID44041_TTGGCAACAGCATACT	-0.252906	Background
CID44041_AAACCTGAGCACACAG	0.00442639	Background
CID44041_AAGACCTTCCGCGCAA	-0.140202	Background
CID44041_ACCCACTTCAACGAAA	-0.255027	Background
CID44041_ACGAGGAAGATGTAAC	-0.156024	Background
CID44041_ACTGCTCAGTAGTGCG	-0.126207	Background
CID44041_ATAACGCGTCTAAAGA	-0.17489	Background
CID44041_ATCCGAACAAGCCGCT	-0.0203627	Background
CID44041_ATGGGAGTCGAGAACG	-0.224307	Background
CID44041_CACAAACTCCGAGCCA	-0.298186	Background
CID44041_CAGCATAAGAGCCCAA	-0.243285	Background
CID44041_CATCAGATCTAAGCCA	-0.0150319	Background
CID44041_CCCTCCTTCCGTAGTA	-0.0560659	Background
CID44041_CCTACACGTTCTGGTA	-0.0661764	Background
CID44041_CCTACACTCACATACG	-0.277356	Background
CID44041_CGGACGTTCCTGTAGA	-0.246868	Background
CID44041_CGTCAGGAGGGTATCG	-0.200406	Background
CID44041_CGTTCTGAGCCACCTG	-0.153167	Background
CID44041_CTCACACTCAATCACG	-0.25561	Background
CID44041_CTCTACGGTACTTGAC	-0.234848	Background
CID44041_CTGCCTATCAGTCAGT	-0.225417	Background
CID44041_CTTAGGAGTATCTGCA	-0.130142	Background
CID44041_GACTACAGTCAGAATA	-0.266524	Background
CID44041_GATGAAAAGGGATGGG	-0.19873	Background
CID44041_GATGCTAAGCCGCCTA	0.0634886	Background
CID44041_GCTGGGTCACGGTTTA	-0.121945	Background
CID44041_GCTGGGTGTGCAGGTA	-0.0321563	Background
CID44041_GGACGTCCAGACGCAA	0.0457383	Background
CID44041_GGTGTTAGTAGCAAAT	-0.140517	Background
CID44041_GTAGGCCTCGGAGGTA	-0.142239	Background
CID44041_GTTAAGCAGAACAATC	-0.185174	Background
CID44041_GTTAAGCAGACAAAGG	-0.237049	Background
CID44041_TAGTGGTCAGGTCCAC	0.036287	Background
CID44041_TAGTGGTGTAAACACA	-0.0426763	Background
CID44041_TATTACCCAGGGAGAG	-0.202038	Background
CID44041_TCAACGATCGTCACGG	-0.314857	Background
CID44041_TCGTAGATCAGTCCCT	-0.182829	Background
CID44041_TCTTTCCCAAAGTCAA	-0.242835	Background
CID44041_TGGCTGGCAGACGTAG	-0.0188038	Background
CID44041_TTTCCTCAGTTAGGTA	-0.0249845	Background
CID44041_ATCGAGTCATGACGGA	-0.184422	Background
CID44041_TCAGATGTCTAACGGT	-0.165995	Background
CID44041_ACAGCCGCAGGTCGTC	-0.187332	Background
CID44041_ACGAGCCCAGATAATG	-0.176111	Background
CID44041_ACGCCAGAGTGAACAT	-0.171219	Background
CID44041_ACTGAACAGTGTTGAA	-0.191827	Background
CID44041_AGAGCGAAGCCGGTAA	-0.171039	Background
CID44041_AGCGGTCAGAGCAATT	-0.173064	Background
CID44041_AGCGGTCTCTACCAGA	-0.181815	Background
CID44041_CACAAACCAAAGGCGT	-0.190537	Background
CID44041_CACACAAAGGATATAC	-0.174121	Background
CID44041_CACACAATCCTTGCCA	-0.172487	Background
CID44041_CACAGGCGTGCAACGA	-0.179651	Background
CID44041_CAGTAACGTCGGCATC	-0.172848	Background
CID44041_CATCAGAAGGTTACCT	-0.185733	Background
CID44041_CCACGGATCCTTTCTC	-0.178589	Background
CID44041_CCCAGTTCAAGCGATG	-0.185664	Background
CID44041_CCTCTGATCTTGCATT	-0.185981	Background
CID44041_CGAACATTCGAGAACG	-0.158046	Background
CID44041_CGCTATCCATGCTGGC	-0.182608	Background
CID44041_CGTGTCTAGAGTACAT	-0.188443	Background
CID44041_GAGGTGAAGCGTGAAC	-0.18431	Background
CID44041_GCGCAACCATGCTGGC	-0.180356	Background
CID44041_GCGCAGTTCCAACCAA	-0.192036	Background
CID44041_GCGGGTTGTGCATCTA	-0.176488	Background
CID44041_GCTGGGTTCCCTCTTT	-0.185519	Background
CID44041_GGCTCGATCACAACGT	-0.182288	Background
CID44041_GGTGTTAAGCTAACAA	-0.183671	Background
CID44041_GTATCTTCATCCGCGA	-0.183145	Background
CID44041_GTCTTCGAGGGAGTAA	-0.162929	Background
CID44041_TACACGAAGTATCTCG	-0.182488	Background
CID44041_TAGAGCTCAGCCTGTG	-0.183164	Background
CID44041_TCAACGATCTAACCGA	-0.189369	Background
CID44041_TCCCGATGTTCGGCAC	-0.166435	Background
CID44041_TCGAGGCGTCTTTCAT	-0.169014	Background
CID44041_TGCGCAGGTCCATCCT	-0.179955	Background
CID44041_TGCGGGTGTCCGACGT	-0.128914	Background
CID44041_TGGACGCCATGCTGGC	-0.178889	Background
CID44041_TTATGCTTCTCGAGTA	-0.18588	Background
CID44041_TTTGGTTCACCACGTG	-0.184298	Background
CID44041_TTTGTCAAGTGTGGCA	-0.200896	Background
CID44041_CATGGCGTCGGCTTGG	-0.170597	Background
CID44041_CCTATTAAGAAGGCCT	-0.188869	Background
CID44041_TCAACGAGTTCGGCAC	-0.190465	Background
CID44041_AACGTTGTCTAAGCCA	-0.178749	Background
CID44041_AAGGTTCAGAAGGCCT	-0.184264	Background
CID44041_ACATGGTTCCTAGAAC	-0.186018	Background
CID44041_ACTGAGTAGTTCCACA	-0.166234	Background
CID44041_AGATCTGGTTTAGCTG	-0.18798	Background
CID44041_AGTGGGAGTTCCACTC	-0.178745	Background
CID44041_ATAAGAGAGTAAGTAC	-0.159214	Background
CID44041_ATCACGAAGACCGGAT	-0.181504	Background
CID44041_CAAGAAACATAAAGGT	-0.187977	Background
CID44041_CATCAAGAGTAAGTAC	-0.164798	Background
CID44041_CCGGGATAGAAACCGC	-0.173094	Background
CID44041_CCTATTATCATTATCC	-0.196158	Background
CID44041_CCTCAGTCAGCCTTTC	-0.17901	Background
CID44041_CGGACGTGTGAGGCTA	-0.178837	Background
CID44041_CTACATTGTCTGGAGA	-0.12413	Background
CID44041_CTGATCCTCTACTCAT	-0.176747	Background
CID44041_CTTAACTCAGACGCAA	-0.181015	Background
CID44041_GAAATGAAGCAGCGTA	-0.153115	Background
CID44041_GATCGTACATGCATGT	-0.189156	Background
CID44041_GGTGCGTGTGCACCAC	-0.178388	Background
CID44041_TACAGTGTCATGCTCC	-0.181533	Background
CID44041_TCTGAGACAAACAACA	-0.192976	Background
CID44041_TGCACCTTCACAGTAC	-0.167773	Background
CID44041_TGCGGGTTCACGCATA	-0.190444	Background
CID44041_TGGTTCCGTCTCTCGT	-0.172372	Background
CID44041_TGTGTTTGTCAAAGCG	-0.175559	Background
CID44041_TTATGCTAGTGTACGG	-0.159552	Background
CID44041_TTGGCAACATCAGTCA	-0.155181	Background
CID44041_ACATGGTAGACTCGGA	-0.146951	Background
CID44041_CCTAGCTGTCTTGCGG	-0.189246	Background
CID44041_CGATTGAAGGCCGAAT	-0.163474	Background
CID44041_TAAGAGAGTGTAACGG	-0.183382	Background
CID44041_TGGGCGTGTGATGTGG	-0.177231	Background
CID44041_ACGCCAGCACGTCAGC	-0.135755	Background
CID44041_GGCAATTTCCAGTAGT	-0.192221	Background
CID44041_AACCATGCACCAACCG	-0.160191	Background
CID44041_ACATACGAGCTTCGCG	-0.186898	Background
CID44041_AGACGTTCAGCGTTCG	-0.174131	Background
CID44041_CAAGATCAGCTCTCGG	-0.168649	Background
CID44041_CATCGGGCAGTATGCT	-0.145669	Background
CID44041_CCTTCCCGTTGGTGGA	-0.134255	Background
CID44041_CTTAGGACAGGAACGT	-0.189828	Background
CID44041_TCGCGAGCATCTACGA	-0.153411	Background
CID44041_TTATGCTCACAGGAGT	-0.184646	Background
CID44041_TTGCCGTAGTCATGCT	-0.166306	Background
CID44041_TTGTAGGCAGTCCTTC	-0.170537	Background
CID44041_AACTCTTAGGTGACCA	-0.180542	Background
CID44041_AGAGTGGTCCTCGCAT	-0.201506	Background
CID44041_CAACCTCAGTCCGTAT	-0.171229	Background
CID44041_CGGAGTCTCCAGATCA	-0.194877	Background
CID44041_GACGGCTGTTCATGGT	-0.168601	Background
CID44041_GTAACGTTCGGTTCGG	-0.164494	Background
CID44041_TCAACGAAGGCTAGCA	-0.18154	Background
CID44041_CATGGCGCAAGGTTCT	-0.187312	Background
CID44041_CTCTACGGTTAAGGGC	-0.188149	Background
CID44041_CTGTGCTGTCCTGCTT	-0.176003	Background
CID44041_GACGGCTGTACGAAAT	-0.17816	Background
CID44041_GGACAAGCAGGGCATA	-0.167913	Background
CID44041_GGACATTCAAGAAAGG	-0.195486	Background
CID44041_TGTTCCGGTGCAGGTA	-0.180105	Background
CID44041_CAGCTGGGTCTCTCTG	-0.150025	Background
CID44041_CGCTGGAGTATCACCA	-0.17382	Background
CID44041_GAAATGAGTGCATCTA	-0.18643	Background
CID44041_GCCTCTATCGCCTGTT	-0.170696	Background
CID44041_GCGAGAAAGGATATAC	-0.190927	Background
CID44041_GGGTCTGCATCACCCT	-0.160029	Background
CID44041_AACTCCCTCTGCCCTA	-0.164219	Background
CID44041_AAGACCTTCCGTCATC	-0.130214	Background
CID44041_AAGGCAGCAGTGACAG	-0.186129	Background
CID44041_ACGATACTCATCTGCC	-0.17221	Background
CID44041_ACGGCCACATAGAAAC	-0.188977	Background
CID44041_ATAACGCTCTGTCTCG	-0.180265	Background
CID44041_ATCTGCCAGTGCGTGA	-0.176787	Background
CID44041_ATGGGAGAGAGGACGG	-0.150877	Background
CID44041_ATTGGTGCACATTTCT	-0.186655	Background
CID44041_CAGCCGATCTCCAGGG	-0.189478	Background
CID44041_CAGCTAATCTGTACGA	-0.190116	Background
CID44041_CAGCTGGCACCGGAAA	-0.168687	Background
CID44041_CATCAGACATGTCTCC	-0.187121	Background
CID44041_CATGACACATTTCACT	-0.182894	Background
CID44041_CATTCGCAGGAGTAGA	-0.181774	Background
CID44041_CCAATCCTCCAGGGCT	-0.187894	Background
CID44041_CCAGCGATCCCTTGTG	-0.191817	Background
CID44041_CCATTCGCAGATCGGA	-0.121022	Background
CID44041_CCCATACCACGAGGTA	-0.145575	Background
CID44041_CCGTACTAGCGATCCC	-0.169415	Background
CID44041_CCTACCACACTCTGTC	-0.179991	Background
CID44041_CGAGCCACACTTGGAT	-0.178087	Background
CID44041_CGCTGGACACAGAGGT	-0.165658	Background
CID44041_CGGACTGCAATGAAAC	-0.156155	Background
CID44041_CTAATGGAGGTGCTTT	-0.191773	Background
CID44041_CTCTACGGTCGCCATG	-0.187772	Background
CID44041_CTCTGGTTCCAAAGTC	-0.191379	Background
CID44041_CTTCTCTAGGTGATTA	-0.176477	Background
CID44041_GATTCAGAGACACTAA	-0.191342	Background
CID44041_GCAGCCATCTTCATGT	-0.187875	Background
CID44041_GCGCCAAGTAAGTGTA	-0.180546	Background
CID44041_GCGCCAAGTTGTCGCG	-0.15045	Background
CID44041_GCGCGATCAGGATTGG	-0.175457	Background
CID44041_GCTGGGTTCCGCGTTT	-0.188949	Background
CID44041_GCTTCCATCATAGCAC	-0.175065	Background
CID44041_GGACGTCGTCGCGGTT	-0.166205	Background
CID44041_GGCGACTGTGCGGTAA	-0.179691	Background
CID44041_GGCGTGTTCGCGGATC	-0.186078	Background
CID44041_GTAACTGTCCTAGGGC	-0.179532	Background
CID44041_GTCAAGTAGCTGTCTA	-0.181576	Background
CID44041_GTCGGGTTCACAGGCC	-0.160611	Background
CID44041_GTCTTCGGTCTGGTCG	-0.179275	Background
CID44041_TAGGCATGTCTTCTCG	-0.186618	Background
CID44041_TCACGAATCACATGCA	-0.147736	Background
CID44041_TCTGAGATCCACGACG	-0.186597	Background
CID44041_TCTGGAATCAACACTG	-0.165179	Background
CID44041_TGAGGGACAGTGACAG	-0.180229	Background
CID44041_TGCCAAAAGTATTGGA	-0.183637	Background
CID44041_TGCTGCTTCACTTATC	-0.186743	Background
CID44041_TTGAACGGTATATGGA	-0.154993	Background
CID44041_TTGCGTCTCCTCCTAG	-0.191956	Background
CID44041_AGCGTATCACGAGAGT	-0.134505	Background
CID44041_ATGAGGGTCCGCGTTT	-0.119054	Background
CID44041_CATGCCTAGCCGCCTA	-0.178392	Background
CID44041_CGCTATCGTGGTAACG	-0.19637	Background
CID44041_CTAGCCTTCGTTACAG	-0.145378	Background
CID44041_CTGATAGCACCCAGTG	-0.117065	Background
CID44041_TCAGCTCAGGGTCTCC	-0.167713	Background
CID44041_TCCCGATGTCAGAATA	-0.171213	Background
CID44041_TGGACGCTCCAAGCCG	-0.176017	Background
CID44041_TGGGCGTCAATGGATA	-0.148325	Background
CID44041_ACTTTCAAGGCATGTG	-0.163937	Background
CID44041_CACACCTGTCAACATC	-0.189852	Background
CID44041_CACACTCTCGCCCTTA	-0.177513	Background
CID44041_GACGTGCCAAGACGTG	-0.164982	Background
CID44041_GGGCATCAGTTAGCGG	-0.172832	Background
CID44041_GCAGCCAGTAGTACCT	-0.178806	Background
CID44041_CGTAGCGGTGTGCCTG	-0.163379	Background
CID44041_CTACACCCAGCTCGAC	-0.196578	Background
CID44041_CTTAGGATCCTTGGTC	-0.175047	Background
CID44041_CTCGAGGGTTTGTGTG	-0.186362	Background
CID44041_GCCTCTAAGTCCTCCT	-0.183257	Background
CID44041_GGTGTTAGTACCGTAT	-0.163816	Background
CID44041_ATCCGAAGTTACGTCA	-0.136317	Background
CID44041_CAGGTGCGTGCAACGA	-0.194907	Background
CID44041_CATCAGAGTGGTCCGT	-0.165037	Background
CID44041_GTATTCTGTAGCACGA	-0.164043	Background
CID44041_GTTAAGCAGAGGGCTT	-0.180653	Background
CID44041_TGGGAAGGTGTGGCTC	-0.171977	Background
CID44041_TTCTTAGTCACGATGT	-0.185529	Background
CID44041_GGAATAACAAGACGTG	-0.180523	Background
CID44041_TCAGCAAGTACCCAAT	-0.122156	Background
CID44041_CTTAGGAGTCGAACAG	-0.21107	Background
CID44041_TGTGTTTCAATCTGCA	-0.206553	Background
CID44041_AACCATGGTGCACGAA	-0.218414	Background
CID44041_CGAGCCAGTCTTCTCG	-0.136213	Background
CID44041_CGATGTACATGGGACA	-0.16893	Background
CID44041_CTGATCCTCTTAGCCC	-0.210025	Background
CID44041_GGGCATCAGACAAGCC	-0.225866	Background
CID44041_TATCAGGGTGCAGTAG	-0.151964	Background
CID44041_TCAACGACATCAGTAC	-0.204771	Background
CID44041_TCTGAGAGTTCCAACA	-0.184999	Background
CID44041_TGGCGCACACCATGTA	-0.241847	Background
CID44041_GGATGTTGTTCTGGTA	-0.203538	Background
CID44041_TCGGTAAAGCTGATAA	-0.236638	Background
CID44041_AACTTTCGTCAGCTAT	-0.194581	Background
CID44041_ACACTGACACCAGCAC	-0.213151	Background
CID44041_CGTCAGGCACATTCGA	-0.195392	Background
CID44041_AACGTTGCATCATCCC	-0.159182	Background
CID44041_CTAGCCTCACGCTTTC	-0.183377	Background
CID44041_TTAGGACCACCAACCG	-0.193675	Background
CID44041_AACACGTGTAAGAGGA	-0.159824	Background
CID44041_AACGTTGGTAGAGTGC	-0.0503044	Background
CID44041_ACACCGGGTTTAGCTG	-0.14422	Background
CID44041_ACGATACAGTGATCGG	-0.199593	Background
CID44041_ACTGCTCCAGGTCGTC	-0.16993	Background
CID44041_ACTTGTTTCGTAGATC	0.0925353	Background
CID44041_AGGCCGTGTCATGCCG	-0.182363	Background
CID44041_AGTGGGAGTCACTTCC	-0.173958	Background
CID44041_ATCACGAGTTACCGAT	-0.172039	Background
CID44041_ATTATCCAGATCTGAA	-0.147472	Background
CID44041_CCACGGACAATGCCAT	-0.156811	Background
CID44041_CCCAATCTCATGTCTT	-0.198755	Background
CID44041_CCGTGGAAGGCGACAT	-0.164599	Background
CID44041_CCTACACTCAACACTG	-0.171755	Background
CID44041_CCTTACGAGGGTGTTG	-0.17294	Background
CID44041_CGAGAAGTCTCGTTTA	-0.156537	Background
CID44041_CGATCGGAGTACGCCC	-0.136998	Background
CID44041_CGCGGTACATTTGCCC	-0.178215	Background
CID44041_CTAATGGTCCAGTAGT	-0.192047	Background
CID44041_CTAGAGTCACTGCCAG	-0.164214	Background
CID44041_CTCATTACAGGGAGAG	-0.171134	Background
CID44041_CTCTGGTGTCTCCATC	-0.165034	Background
CID44041_GAAATGAGTTGCGTTA	-0.128227	Background
CID44041_GACGTGCAGTGTACTC	-0.188493	Background
CID44041_GATGAGGGTAGCAAAT	-0.172234	Background
CID44041_GATTCAGCAGCATGAG	-0.226427	Background
CID44041_GCAAACTAGGCGATAC	-0.165124	Background
CID44041_GCACTCTAGTCAATAG	-0.159	Background
CID44041_GCATGATTCGTCCGTT	-0.187214	Background
CID44041_GGAAAGCAGGAGCGTT	-0.142353	Background
CID44041_GGCTCGAAGAAACGCC	-0.174153	Background
CID44041_GTAACGTGTTTAAGCC	-0.185785	Background
CID44041_GTAGGCCAGCGCCTCA	-0.171511	Background
CID44041_GTAGGCCGTAAGTGGC	-0.164472	Background
CID44041_GTATCTTGTCTCGTTC	-0.183088	Background
CID44041_GTCGTAACAACCGCCA	-0.183731	Background
CID44041_TACTTGTTCTGGCGAC	-0.0994109	Background
CID44041_TCAATCTGTGAGTGAC	-0.0586675	Background
CID44041_TCAGATGAGTAGCGGT	-0.185945	Background
CID44041_TCAGCAACAGGAACGT	-0.0258896	Background
CID44041_TCATTTGTCAACTCTT	-0.151472	Background
CID44041_TCTGGAACAAACTGTC	-0.186895	Background
CID44041_TCTGGAACATGTTGAC	-0.186075	Background
CID44041_TGAAAGAAGAATGTTG	-0.168239	Background
CID44041_TGCTACCTCTCCGGTT	-0.179877	Background
CID44041_TGGCTGGTCGAGAACG	-0.18345	Background
CID44041_TGTCCCAAGGAATCGC	-0.152988	Background
CID44041_TTAGGCATCGCGTTTC	-0.161412	Background
CID44041_TTGCGTCGTCTCCATC	-0.186068	Background
CID44041_AATCCAGCACTGTCGG	-0.157693	Background
CID44041_ACATACGGTCTCCACT	-0.187549	Background
CID44041_ACTTACTTCTTAGAGC	-0.150544	Background
CID44041_CACACCTAGGCTCAGA	-0.177352	Background
CID44041_CTACGTCGTCTTGCGG	-0.185638	Background
CID44041_CGGTTAACAATGTTGC	-0.193365	Background
CID44041_GTCTCGTCAGCCAGAA	-0.175022	Background
CID44041_TCCCGATAGTACTTGC	-0.17282	Background
CID44041_ACGAGCCTCTCTTATG	-0.185417	Background
CID44041_CGGTTAAGTCTTTCAT	-0.182601	Background
CID44041_GCGCGATGTATGGTTC	-0.185516	Background
CID44041_TCAGGTAAGCTTATCG	-0.176167	Background
CID44041_CGTTAGAGTTCGAATC	-0.15003	Background
CID44041_AACTCTTAGCATGGCA	-0.182695	Background
CID44041_CGGACTGAGATCGGGT	-0.18352	Background
CID44041_GAGTCCGGTCTTGTCC	-0.180679	Background
CID44041_TCGGGACTCCAAAGTC	-0.182641	Background
CID44041_TTTACTGAGAATGTTG	-0.175376	Background
CID44041_CCCTCCTGTCTAGCGC	-0.194278	Background
CID44041_GACCTGGGTAGAGTGC	-0.189341	Background
CID44041_AAGGTTCTCACAGGCC	-0.231341	Background
CID44041_CATTCGCTCTTGAGAC	-0.233957	Background
CID44041_CTACACCGTAGGGTAC	-0.216066	Background
CID44041_TACCTATTCCTAGTGA	-0.166234	Background
CID44041_GACACGCAGTCCATAC	-0.220451	Background
CID44041_ATCCGAAGTCGCTTTC	-0.209234	Background
CID44041_GACAGAGCAAGACACG	-0.174234	Background
CID44041_AACTCCCTCCGTCAAA	-0.152541	Background
CID44041_AAGGAGCGTCAGAGGT	-0.164185	Background
CID44041_AAGGAGCTCTAAGCCA	-0.0809964	Background
CID44041_AAGGTTCAGGGTTTCT	-0.159389	Background
CID44041_AATCGGTAGCCGTCGT	-0.171298	Background
CID44041_ACATACGAGACTTGAA	-0.23798	Background
CID44041_ACCCACTCACGAAGCA	-0.204299	Background
CID44041_ACTTACTCATAGACTC	-0.197677	Background
CID44041_ACTTTCATCCATGCTC	-0.137502	Background
CID44041_AGGTCATCATGGAATA	-0.198743	Background
CID44041_AGGTCCGTCGGAGGTA	-0.238182	Background
CID44041_ATAAGAGCAACACGCC	-0.181941	Background
CID44041_CAGCAGCAGCGCTTAT	-0.214382	Background
CID44041_CAGCCGAAGTGCCATT	-0.206647	Background
CID44041_CAGCCGAGTATGCTTG	-0.198416	Background
CID44041_CATATTCCATCACAAC	-0.230712	Background
CID44041_CCAATCCAGCCGCCTA	-0.179289	Background
CID44041_CCACGGATCTGTTGAG	-0.186077	Background
CID44041_CCCTCCTTCTTACCGC	-0.179669	Background
CID44041_CCGGTAGGTAGCTGCC	-0.187431	Background
CID44041_CCTACACCACGGCCAT	-0.239468	Background
CID44041_CCTCTGAGTCTCTTTA	-0.203146	Background
CID44041_CCTTCGAGTATAGGTA	-0.210484	Background
CID44041_CGAACATCAAGCCATT	-0.196987	Background
CID44041_CGAACATGTTATTCTC	-0.204848	Background
CID44041_CGACCTTTCAGCGACC	-0.18214	Background
CID44041_CGAGAAGAGCTAGTCT	-0.198697	Background
CID44041_CGATGGCTCCCTTGCA	-0.227283	Background
CID44041_CGATGTAGTACCGGCT	-0.236682	Background
CID44041_CGCGTTTTCCTCGCAT	-0.170014	Background
CID44041_CGCTGGAGTCGGCTCA	-0.185154	Background
CID44041_CGGAGTCAGCCCAGCT	-0.0645775	Background
CID44041_CGTAGCGAGGACAGAA	-0.159239	Background
CID44041_CGTAGGCAGAAGGTGA	-0.168405	Background
CID44041_CGTCTACCATATGGTC	-0.231873	Background
CID44041_CTAACTTAGTGTACCT	-0.146297	Background
CID44041_CTAATGGAGATCCTGT	-0.207307	Background
CID44041_CTCGGAGCAGATCTGT	-0.229548	Background
CID44041_CTCGGAGCATAAGACA	-0.224085	Background
CID44041_CTCTAATAGTACTTGC	-0.188414	Background
CID44041_CTGATCCAGAATCTCC	-0.240502	Background
CID44041_CTGGTCTGTATAGGGC	-0.196559	Background
CID44041_CTGTGCTCAGATTGCT	-0.206683	Background
CID44041_CTTAGGAAGTGAACGC	-0.203636	Background
CID44041_GAACATCGTCGCATAT	-0.198223	Background
CID44041_GAAGCAGCATCCGTGG	0.00968707	Background
CID44041_GACGCGTAGATGGCGT	-0.212515	Background
CID44041_GAGTCCGCATGCATGT	-0.198198	Background
CID44041_GATGCTATCATAACCG	-0.230918	Background
CID44041_GCAAACTAGTGCCATT	-0.207342	Background
CID44041_GCAGCCAGTCGCTTCT	-0.202282	Background
CID44041_GCATGTAGTATTAGCC	-0.211512	Background
CID44041_GCCAAATAGCCGCCTA	-0.191176	Background
CID44041_GCGCAGTAGAAGGACA	-0.17423	Background
CID44041_GCTGCAGTCATCTGCC	-0.194854	Background
CID44041_GCTGCAGTCTGCGTAA	-0.0675527	Background
CID44041_GCTGCTTTCCCGACTT	-0.195291	Background
CID44041_GGACGTCCATTCACTT	-0.220115	Background
CID44041_GGTGTTAGTAGGAGTC	-0.188749	Background
CID44041_GTAACTGAGCACGCCT	-0.235757	Background
CID44041_GTACGTACATGCCTTC	-0.202914	Background
CID44041_GTGTGCGAGTGTGGCA	-0.201537	Background
CID44041_TAAACCGCAAGTTGTC	-0.208146	Background
CID44041_TAAGCGTTCCGAGCCA	-0.139863	Background
CID44041_TACAGTGCATCCTTGC	-0.217785	Background
CID44041_TACCTTAGTCTGATTG	-0.164873	Background
CID44041_TAGCCGGTCTGAGTGT	-0.209693	Background
CID44041_TCAGCTCGTTGTTTGG	-0.20066	Background
CID44041_TCTGAGAAGGCAGTCA	-0.173551	Background
CID44041_TGAGCATTCATGTGGT	-0.125531	Background
CID44041_TGCCAAAGTCATCCCT	-0.19839	Background
CID44041_TGCCCTAGTCGAAAGC	-0.144632	Background
CID44041_TGCGTGGCAAACAACA	-0.210966	Background
CID44041_TGGGCGTGTAAGTTCC	-0.18786	Background
CID44041_TGGTTCCAGAAGGGTA	-0.229952	Background
CID44041_TTAACTCTCGCCCTTA	-0.208268	Background
CID44041_TTAGGCATCACTATTC	-0.184375	Background
CID44041_TTGCGTCAGGCAGGTT	-0.228784	Background
CID44041_TGAAAGATCGTTACGA	-0.176797	Background
CID44041_AAAGATGGTCTCACCT	-0.194357	Background
CID44041_AAAGTAGTCGGCGGTT	-0.200755	Background
CID44041_AACACGTAGGAACTGC	-0.186856	Background
CID44041_AACTTTCCAGGGTTAG	-0.212635	Background
CID44041_ACCCACTAGACGCTTT	-0.17102	Background
CID44041_ACCGTAATCCTTAATC	-0.181226	Background
CID44041_ACTGAACGTCTCGTTC	-0.11228	Background
CID44041_AGCAGCCTCTGATACG	-0.184007	Background
CID44041_AGCATACTCACCCGAG	-0.139967	Background
CID44041_AGTCTTTAGATGCCTT	-0.209768	Background
CID44041_ATAGACCCAATACGCT	-0.212951	Background
CID44041_ATCTGCCCACAGGTTT	-0.187914	Background
CID44041_ATGAGGGGTTCTCATT	-0.175819	Background
CID44041_ATGGGAGTCCGTTGTC	-0.205352	Background
CID44041_ATTGGTGCAGGGTTAG	-0.180772	Background
CID44041_CACATAGGTCTCCATC	-0.184401	Background
CID44041_CACCACTGTCCGAGTC	-0.189082	Background
CID44041_CAGCAGCGTTGCTCCT	-0.199388	Background
CID44041_CAGCTAAGTAAGAGAG	-0.194106	Background
CID44041_CATCAAGGTAGAAGGA	-0.201503	Background
CID44041_CATCAGACAAACTGTC	-0.202901	Background
CID44041_CCAGCGAAGCCAGGAT	-0.18035	Background
CID44041_CCAGCGACACAGGTTT	-0.185326	Background
CID44041_CCCAATCAGCGATCCC	-0.200261	Background
CID44041_CCTACACGTGAGGCTA	-0.188185	Background
CID44041_CCTCTGAAGCGTGAAC	-0.18638	Background
CID44041_CCTTCCCGTGTTCTTT	-0.179081	Background
CID44041_CGAGCACAGGACATTA	-0.18897	Background
CID44041_CGGACACGTCTCACCT	-0.172641	Background
CID44041_CTACACCAGAGAACAG	-0.15766	Background
CID44041_CTCGAAAGTTACTGAC	-0.178654	Background
CID44041_CTCGAAATCACAATGC	-0.20736	Background
CID44041_CTCGGGACATACCATG	-0.203636	Background
CID44041_CTGATAGCACACATGT	-0.167593	Background
CID44041_GAAGCAGTCTGGAGCC	-0.172896	Background
CID44041_GACAGAGTCCTAGGGC	-0.18052	Background
CID44041_GACGGCTCATCAGTCA	-0.182691	Background
CID44041_GCATACAAGCGTTTAC	-0.111318	Background
CID44041_GCATACAAGCTGCGAA	-0.184448	Background
CID44041_GCGCAGTGTTGTACAC	-0.189536	Background
CID44041_GGACATTTCCGAACGC	-0.172875	Background
CID44041_GGCTCGACACTTCGAA	-0.166164	Background
CID44041_GGTGTTAAGGACATTA	-0.18052	Background
CID44041_GTCGGGTTCGTCGTTC	-0.185102	Background
CID44041_GTCTTCGCATTTCACT	-0.182862	Background
CID44041_GTGCGGTTCGCATGAT	-0.195149	Background
CID44041_GTGGGTCGTAGGGTAC	-0.186945	Background
CID44041_GTTCATTAGATGGGTC	-0.206093	Background
CID44041_TACCTATTCGAGAGCA	-0.167977	Background
CID44041_TATCAGGGTATCGCAT	-0.21542	Background
CID44041_TATGCCCTCGCTGATA	-0.200745	Background
CID44041_TCTCTAATCCAAAGTC	-0.184488	Background
CID44041_TGACGGCTCTGCCAGG	-0.154279	Background
CID44041_TGACTAGGTTGGGACA	-0.19025	Background
CID44041_TGCCAAAGTGTTTGGT	-0.179282	Background
CID44041_TGCGTGGGTTTGTTTC	-0.194659	Background
CID44041_TGCTACCCATTATCTC	-0.197065	Background
CID44041_TTAACTCGTACTTAGC	-0.196028	Background
CID44041_TTAGGACGTCCGAAGA	-0.207316	Background
CID44041_TTGAACGAGATTACCC	-0.151301	Background
CID44041_CCTTACGGTTACGCGC	-0.200735	Background
CID44041_GCGAGAATCAGTCCCT	-0.194185	Background
CID44041_GGTGCGTTCGTCGTTC	-0.186942	Background
CID44041_TTCGAAGAGACAATAC	-0.161226	Background
CID44041_AAAGATGCATCAGTAC	-0.192717	Background
CID44041_AAGGAGCCACCAGTTA	-0.171757	Background
CID44041_ACACCAAAGGTACTCT	-0.150198	Background
CID44041_ACACCAACAAGTCATC	-0.177434	Background
CID44041_ACCAGTAAGTTAGGTA	-0.179204	Background
CID44041_ACGCCAGCATATGAGA	-0.169327	Background
CID44041_ACGCCGACATGCCACG	-0.210038	Background
CID44041_ACTTGTTCAAACTGCT	-0.172911	Background
CID44041_AGAATAGTCTGCAGTA	-0.179522	Background
CID44041_AGGCCACCACCTCGTT	-0.200536	Background
CID44041_AGGGTGAGTGCACCAC	-0.211944	Background
CID44041_ATCACGAGTACTTAGC	-0.185709	Background
CID44041_ATGTGTGGTAATCACC	-0.180498	Background
CID44041_CAACCTCGTGTCGCTG	-0.169445	Background
CID44041_CAACTAGCAAGACACG	-0.202137	Background
CID44041_CAAGGCCCAGAGTGTG	-0.197155	Background
CID44041_CACAAACCAGATGGGT	-0.169081	Background
CID44041_CATGGCGCAGCATACT	-0.178709	Background
CID44041_CCCAATCCATGAACCT	-0.184251	Background
CID44041_CGATGTATCGTGGGAA	-0.133921	Background
CID44041_CGTTCTGCAGCCAGAA	-0.176792	Background
CID44041_CTACGTCTCAGGCAAG	-0.158714	Background
CID44041_CTCTACGTCACCCTCA	-0.200402	Background
CID44041_GGGACCTAGCATCATC	-0.212323	Background
CID44041_GGTGCGTTCCTAGTGA	-0.159674	Background
CID44041_GTAACGTCATCTACGA	-0.182384	Background
CID44041_TAGACCATCCAAATGC	-0.188035	Background
CID44041_TATCTCATCAGTGTTG	-0.195039	Background
CID44041_TCAACGAGTAGCGCTC	-0.200152	Background
CID44041_TCAACGATCGCAGGCT	-0.184041	Background
CID44041_TCGGTAAGTCTGGTCG	-0.177186	Background
CID44041_TCTCATAAGCACAGGT	-0.161224	Background
CID44041_TGACTTTAGCCAGGAT	-0.178088	Background
CID44041_TGCGGGTTCCAACCAA	-0.193037	Background
CID44041_CTCACACGTTAGAACA	-0.189215	Background
CID44041_CTGGTCTAGCCAGAAC	-0.195649	Background
CID44041_TTAGTTCCAAGTCATC	-0.149252	Background
CID44041_TTTACTGCACAAGCCC	-0.0994102	Background
CID44041_CCAGCGAAGAGAGCTC	-0.161731	Background
CID44041_GAACATCGTAAGGATT	-0.192776	Background
CID44041_GAGGTGAAGCAGCGTA	-0.177405	Background
CID44041_GCTGCAGTCCAGAAGG	-0.171894	Background
CID44041_TACCTATGTTGGTAAA	-0.18856	Background
CID44041_AGCGGTCCAGACGCCT	-0.226832	Background
CID44041_CTTAACTAGTGTCTCA	-0.222361	Background
CID44041_GCGACCATCAACACGT	-0.208893	Background
CID44041_GGAACTTTCGAGGTAG	-0.213439	Background
CID44041_TGACTAGGTGCTAGCC	-0.181322	Background
CID44041_TGGCCAGTCGGATGGA	-0.203341	Background
CID44041_CGGACGTAGTCAAGCG	-0.221339	Background
CID44041_TGCCCATGTAGAGCTG	-0.181675	Background
CID44041_ATAGACCCATGGATGG	-0.233583	Background
CID44041_ACGGGTCGTTGGTTTG	-0.162033	Background
CID44041_AGTTGGTGTGGGTATG	-0.150245	Background
CID44041_ATCATGGTCGGAATCT	-0.212551	Background
CID44041_CATTCGCAGCCAGAAC	-0.196642	Background
CID44041_CTAGTGATCTCTAGGA	-0.184937	Background
CID44041_TCAACGATCAACTCTT	-0.217833	Background
CID44041_TCAGCAAAGACACTAA	-0.221013	Background
CID44041_TGACGGCCACCACCAG	-0.172803	Background
CID44041_GACGTGCCATCACGAT	-0.176823	Background
CID44041_TCTCTAACACGTCAGC	-0.178024	Background
CID44041_CAGATCACACAAGACG	-0.150107	Background
CID44041_GCGACCATCGCTAGCG	-0.200692	Background
CID44041_AAAGATGTCCCAAGAT	-0.173872	Background
CID44041_AACTCCCCAATCAGAA	-0.208476	Background
CID44041_AATCGGTCATGCCTAA	-0.203847	Background
CID44041_ACATACGAGGGTTTCT	-0.211248	Background
CID44041_ACGATGTTCGTCTGAA	-0.16486	Background
CID44041_ACGCCAGAGAGTTGGC	-0.198667	Background
CID44041_ACGGAGACAAGGTGTG	-0.191936	Background
CID44041_AGAGCGAAGATGGCGT	-0.184985	Background
CID44041_AGATCTGTCATCATTC	-0.200004	Background
CID44041_AGCTTGAAGGCTAGGT	-0.190985	Background
CID44041_AGGGATGCAGTACACT	-0.195257	Background
CID44041_AGGGATGGTAGCTCCG	-0.200221	Background
CID44041_AGGGATGGTCCGTCAG	-0.169848	Background
CID44041_AGGGTGAAGGGTGTGT	-0.19988	Background
CID44041_AGTCTTTGTAGTAGTA	-0.170793	Background
CID44041_AGTCTTTTCTTATCTG	-0.204487	Background
CID44041_AGTGAGGAGCGATGAC	-0.192108	Background
CID44041_AGTGTCATCAGCAACT	-0.189824	Background
CID44041_AGTTGGTTCGTTACGA	-0.151496	Background
CID44041_ATCATCTCAGACGTAG	-0.185507	Background
CID44041_ATCATCTGTGTTGAGG	-0.186894	Background
CID44041_ATCGAGTAGATGGCGT	-0.130568	Background
CID44041_ATGGGAGCACGAAATA	-0.195451	Background
CID44041_ATGTGTGGTTCACCTC	-0.190372	Background
CID44041_ATTACTCAGTTGTCGT	-0.163173	Background
CID44041_ATTGGACGTTATCGGT	-0.185413	Background
CID44041_ATTGGACTCGACAGCC	-0.194298	Background
CID44041_ATTGGTGAGAGACTAT	-0.187921	Background
CID44041_CAACCAACAGTAAGAT	-0.185093	Background
CID44041_CAACCAAGTACAGCAG	-0.18609	Background
CID44041_CACACCTAGAGAACAG	-0.185703	Background
CID44041_CACAGTAAGTAGGTGC	-0.1776	Background
CID44041_CACCACTAGATCGATA	-0.153649	Background
CID44041_CACCAGGTCTGGGCCA	-0.198395	Background
CID44041_CACTCCAAGTATTGGA	-0.193401	Background
CID44041_CATATGGCAGATCTGT	-0.190191	Background
CID44041_CCACGGAAGATGCCTT	-0.160227	Background
CID44041_CCGGGATAGAAGGACA	-0.174226	Background
CID44041_CCGGTAGGTTAAGTAG	-0.182539	Background
CID44041_CCTACCAAGTGGACGT	-0.187963	Background
CID44041_CCTTTCTAGCTGCAAG	-0.187453	Background
CID44041_CGACTTCCATTTCACT	-0.205279	Background
CID44041_CGCCAAGCACCACGTG	-0.192662	Background
CID44041_CGCTGGAGTGAGGGAG	-0.170501	Background
CID44041_CGCTGGATCGGAAACG	-0.186821	Background
CID44041_CGGAGCTCACGGTAGA	-0.154938	Background
CID44041_CGGAGTCCACCAACCG	-0.189914	Background
CID44041_CGGAGTCCAGCCTATA	-0.198368	Background
CID44041_CGTCTACCAGGACGTA	-0.189227	Background
CID44041_CGTGAGCAGGTGTGGT	-0.170274	Background
CID44041_CGTTCTGTCTTACCTA	-0.199936	Background
CID44041_CTAAGACCATGCCCGA	-0.168587	Background
CID44041_CTACACCCAAGCTGGA	-0.162259	Background
CID44041_CTGAAACGTGGTGTAG	-0.2144	Background
CID44041_CTTAGGAGTCTTGCGG	-0.176375	Background
CID44041_CTTGGCTTCAGAGGTG	-0.190775	Background
CID44041_CTTTGCGAGTGTACTC	-0.193199	Background
CID44041_GAACGGAGTCCGTCAG	-0.186839	Background
CID44041_GAATAAGGTCTACCTC	-0.172448	Background
CID44041_GACAGAGGTCGTTGTA	-0.144557	Background
CID44041_GACTAACGTAAGAGAG	-0.176051	Background
CID44041_GACTAACGTGGCAAAC	-0.200023	Background
CID44041_GACTAACTCCGATATG	-0.175432	Background
CID44041_GACTACAAGCTTTGGT	-0.171536	Background
CID44041_GAGGTGAGTATAGTAG	-0.210195	Background
CID44041_GAGTCCGAGTGTACGG	-0.157767	Background
CID44041_GATCGCGTCACATGCA	-0.151518	Background
CID44041_GCATGTAAGCATCATC	-0.187758	Background
CID44041_GCCAAATAGCGCTCCA	-0.203191	Background
CID44041_GCGACCAGTGTTGGGA	-0.204759	Background
CID44041_GCGCAGTCAGTCTTCC	-0.198547	Background
CID44041_GCGCGATCATCTATGG	-0.188443	Background
CID44041_GCGGGTTTCCAGAAGG	-0.202164	Background
CID44041_GCTGCAGTCGGCGCAT	-0.193245	Background
CID44041_GCTGCGATCGGCGCTA	-0.19025	Background
CID44041_GCTTGAAAGATGTTAG	-0.187525	Background
CID44041_GGAGCAAAGCACAGGT	-0.187441	Background
CID44041_GGATGTTTCCGTCATC	-0.188424	Background
CID44041_GGCGACTTCGCCTGAG	-0.198859	Background
CID44041_GGCTGGTAGATCCCAT	-0.180856	Background
CID44041_GGGCACTCATCGGACC	-0.189761	Background
CID44041_GTATCTTCAAGCCCAC	-0.172714	Background
CID44041_GTCTTCGTCACCCTCA	-0.144657	Background
CID44041_GTGCATAAGCTAAGAT	-0.167043	Background
CID44041_GTTAAGCTCGCCGTGA	-0.201421	Background
CID44041_TACAGTGGTACCGGCT	-0.202245	Background
CID44041_TACTCGCGTTCAGACT	-0.136215	Background
CID44041_TATCAGGAGCTGAAAT	-0.184387	Background
CID44041_TATCAGGCATCTCGCT	-0.171769	Background
CID44041_TATGCCCAGAGCTGCA	-0.218174	Background
CID44041_TCAGCAAGTCGCGAAA	-0.18561	Background
CID44041_TCGTACCCATCGATTG	-0.168994	Background
CID44041_TCTTCGGGTGAACCTT	-0.206388	Background
CID44041_TGAGCCGTCGGCCGAT	-0.199277	Background
CID44041_TGCCCATCATCTCGCT	-0.209845	Background
CID44041_TGCGTGGTCCGTACAA	-0.184779	Background
CID44041_TGGCCAGTCACCGTAA	-0.180856	Background
CID44041_TGGGCGTAGCGTGTCC	-0.177264	Background
CID44041_TGTTCCGAGGGAGTAA	-0.204971	Background
CID44041_TTAGGCAAGACTTGAA	-0.193556	Background
CID44041_TTGAACGCACCCATGG	-0.19443	Background
CID44041_TTGTAGGGTCCAAGTT	-0.174235	Background
CID44041_CGGCTAGGTTAAGTAG	-0.179552	Background
CID44041_GTACTTTGTCTTTCAT	-0.168824	Background
CID44041_CAGCGACTCAGGCGAA	-0.171999	Background
CID44041_CCCAATCGTCTCATCC	-0.186132	Background
CID44041_CTGGTCTTCCGTTGCT	-0.156813	Background
CID44041_GCATGATGTGTTGAGG	-0.211447	Background
CID44041_GCGAGAAGTCCCTACT	-0.210092	Background
CID44041_GGAAAGCTCTGCGACG	-0.226989	Background
CID44041_ACATCAGTCACAGTAC	-0.18986	Background
CID44041_TTCTCCTCATTGGTAC	-0.178121	Background
CID44041_AGATTGCCAAAGTGCG	-0.184324	Background
CID44041_GTAACGTAGGGATACC	-0.186419	Background
CID44041_AACTCAGAGAAACGAG	-0.220177	Background
CID44041_AGATTGCGTACCGTTA	-0.200565	Background
CID44041_AGTAGTCCATGCCTAA	-0.218493	Background
CID44041_ATCATCTTCAAACCGT	-0.177984	Background
CID44041_ATCATGGGTTCCTCCA	-0.165057	Background
CID44041_CAGCAGCAGGACCACA	-0.224188	Background
CID44041_CCTACCAAGAGGTTAT	-0.161514	Background
CID44041_CGTTAGATCAGCTGGC	-0.185898	Background
CID44041_CGTTAGATCTATCGCC	-0.205684	Background
CID44041_GGTGTTATCCACGACG	-0.21836	Background
CID44041_GTATCTTTCGCAAGCC	-0.191438	Background
CID44041_TACTCATGTATATGAG	-0.215573	Background
CID44041_TATGCCCCACGGTGTC	-0.164053	Background
CID44041_TGCCCTATCTGATACG	-0.212962	Background
CID44041_TTTATGCGTTCTCATT	-0.174386	Background
CID44041_CAAGAAAAGTAAGTAC	-0.183348	Background
CID44041_CGTCAGGGTCGCTTTC	-0.165835	Background
CID44041_GACACGCGTAAGTAGT	-0.193849	Background
CID44041_GACGCGTAGGTGATTA	-0.249834	Background
CID44041_GCACATAGTAAGAGAG	-0.189139	Background
CID44041_TACGGTAAGACAGACC	-0.192877	Background
CID44041_TAGTGGTGTTCCACAA	-0.199498	Background
CID44041_ACCCACTAGAGTCGGT	-0.1903	Background
CID44041_CTTCTCTCATGTTGAC	-0.191518	Background
CID44041_GACCTGGGTCAAAGCG	-0.135087	Background
CID44041_GTGGGTCTCACTGGGC	-0.137624	Background
CID44041_TAAGAGACATGAACCT	-0.139485	Background
CID44041_TCGTACCTCTTGCATT	-0.152153	Background
CID44041_TGGTTCCGTCTCATCC	-0.194095	Background
CID44041_CACCAGGTCACTTACT	-0.165099	Background
CID44041_CTGCTGTCATTTCACT	-0.170063	Background
CID44041_AACCGCGAGCGATAGC	-0.153834	Background
CID44041_TCGCGTTGTCCCGACA	-0.204185	Background
CID44041_AGTTGGTTCGTGTAGT	-0.164307	Background
CID44041_ACACCGGGTCTGCAAT	-0.206516	Background
CID44041_ACGCCGACACACTGCG	-0.151573	Background
CID44041_CAGAGAGAGAAGCCCA	-0.213899	Background
CID44041_CATGACAAGGGAACGG	-0.15527	Background
CID44041_GGATGTTGTTCGCGAC	-0.222745	Background
CID44041_GGCTGGTCAGGGTACA	-0.197498	Background
CID44041_TACACGAAGCTGATAA	-0.249778	Background
CID44041_CACAGGCAGATGCCAG	-0.200524	Background
CID44041_AAACGGGAGGTACTCT	-0.254134	Background
CID44041_AACCGCGGTGCACGAA	-0.215037	Background
CID44041_AACTCTTCACAGAGGT	-0.236801	Background
CID44041_AACTGGTAGTGTACTC	-0.262486	Background
CID44041_AAGACCTTCGGTCTAA	-0.207359	Background
CID44041_AAGCCGCTCCTAGAAC	-0.228512	Background
CID44041_ACAGCCGCAGATCCAT	-0.221748	Background
CID44041_ACATGGTTCTGCAGTA	-0.237745	Background
CID44041_ACGTCAAAGGCAATTA	-0.199257	Background
CID44041_ACTGAACGTACCCAAT	-0.240086	Background
CID44041_ACTTGTTGTGACGCCT	-0.189907	Background
CID44041_AGGGATGCAACCGCCA	-0.186597	Background
CID44041_ATAAGAGAGTTCGATC	-0.219117	Background
CID44041_ATCATCTCAATCACAC	-0.222463	Background
CID44041_ATCTACTAGGATATAC	-0.215776	Background
CID44041_ATGAGGGTCTTAGCCC	-0.225879	Background
CID44041_CACAGGCAGACTAAGT	-0.252947	Background
CID44041_CAGCATAAGGTGTGGT	-0.23729	Background
CID44041_CAGCATAGTTGATTGC	-0.23343	Background
CID44041_CATCAGAGTCAGATAA	-0.219415	Background
CID44041_CATTATCGTAAGCACG	-0.192984	Background
CID44041_CCCAGTTAGGTGCTTT	-0.201458	Background
CID44041_CCTCTGATCCAAGTAC	-0.194128	Background
CID44041_CGGACTGAGTATCTCG	-0.229385	Background
CID44041_CGTAGGCGTCAAGCGA	-0.265277	Background
CID44041_CTAACTTTCAGTGTTG	-0.233468	Background
CID44041_CTCGGGAGTCCGACGT	-0.238056	Background
CID44041_CTGTGCTGTCAGGACA	-0.253839	Background
CID44041_GATCGATCAAGACGTG	-0.238068	Background
CID44041_GCCTCTAGTTGTTTGG	-0.237968	Background
CID44041_GCTCTGTTCTAACCGA	-0.218608	Background
CID44041_GCTGCAGAGAAACGAG	-0.228584	Background
CID44041_GGAAAGCAGCCGGTAA	-0.231533	Background
CID44041_GGACATTCATGAGCGA	-0.247478	Background
CID44041_GGACATTTCGCGCCAA	-0.152166	Background
CID44041_GGAGCAACAACGATCT	-0.208972	Background
CID44041_GGGCACTCATATACGC	-0.23097	Background
CID44041_GGGTTGCGTATCAGTC	-0.196983	Background
CID44041_GTAACGTGTTGTGGAG	-0.234851	Background
CID44041_GTGCGGTCATGGTAGG	-0.246288	Background
CID44041_GTGCGGTGTTCCACAA	-0.178507	Background
CID44041_TATGCCCGTGCACCAC	-0.239095	Background
CID44041_TCAGCAAGTAAACACA	-0.225892	Background
CID44041_TCGGGACTCTGTTTGT	-0.248571	Background
CID44041_TGAGAGGAGTGAAGAG	-0.176689	Background
CID44041_TTGGAACAGGCGATAC	-0.215273	Background
CID44041_CTAGCCTAGACAGGCT	-0.244941	Background
CID44041_GCTTGAAAGCGCTCCA	-0.212058	Background
CID44041_TTGAACGCAATGAAAC	-0.205966	Background
CID44041_ACACCCTCACATAACC	-0.199775	Background
CID44041_ACATGGTGTCGCATCG	-0.223915	Background
CID44041_CAAGATCAGCGTGTCC	-0.186272	Background
CID44041_CGTGTCTGTCTTCAAG	-0.144409	Background
CID44041_CTTCTCTGTGTTTGGT	-0.208084	Background
CID44041_GAGGTGAAGTTCGATC	-0.186164	Background
CID44041_GATGAGGGTGTTGGGA	-0.20096	Background
CID44041_GCTTCCACAGTTAACC	-0.213696	Background
CID44041_GTGCATACAAAGAATC	0.14156	Background
CID44041_TCACGAAGTCGGCACT	-0.234136	Background
CID44041_TGGGCGTTCGTCTGCT	-0.174101	Background
CID44041_TGACGGCTCTTTCCTC	-0.149238	Background
CID44041_GGTGCGTGTATCGCAT	-0.176258	Background
CID44041_AGGGATGTCACGCATA	-0.188037	Background
CID44041_AGTAGTCAGGCTCATT	-0.151802	Background
CID44041_ATAACGCTCATCGCTC	-0.134018	Background
CID44041_CAACCAAAGAGTCGGT	-0.150235	Background
CID44041_CACAAACCACGTCTCT	-0.13851	Background
CID44041_CGTGTAAGTATAAACG	-0.130927	Background
CID44041_CTCGGGAGTTAAAGTG	-0.148854	Background
CID44041_CTGATCCTCCACGTGG	-0.145324	Background
CID44041_GACGGCTCAAGAAGAG	-0.169455	Background
CID44041_GCGCGATTCCGCGGTA	-0.122032	Background
CID44041_GGTATTGGTCCGAGTC	-0.166074	Background
CID44041_GTAACTGCAAACGCGA	-0.099276	Background
CID44041_GTACTCCAGGCGACAT	-0.165641	Background
CID44041_TACACGATCGGCGCAT	-0.152253	Background
CID44041_TACCTTAAGGCGTACA	-0.153913	Background
CID44041_TCACGAAAGGCCCGTT	-0.163683	Background
CID44041_TCTGAGATCGTCTGCT	-0.13918	Background
CID44041_TGCACCTTCAGCAACT	-0.178246	Background
CID44041_TGCCCATCATCTCCCA	-0.158478	Background
CID44041_GACTGCGTCAGGCAAG	-0.156324	Background
CID44041_CATCAAGAGTCACGCC	0.0241048	Background
CID44041_CATCAGACAGTAACGG	-0.17214	Background
CID44041_CGAGCCACACAGGAGT	-0.11438	Background
CID44041_GAACGGAGTCCGAGTC	-0.256671	Background
CID44041_AAAGCAAAGGACGAAA	-0.185332	Background
CID44041_AACTTTCTCCTCTAGC	-0.172998	Background
CID44041_AGGGAGTAGCCCAACC	-0.102418	Background
CID44041_CGTGAGCGTCTGATTG	-0.20232	Background
CID44041_GGCTGGTTCCGCGCAA	-0.043457	Background
CID44041_CGTAGCGAGACCTAGG	-0.152321	Background
CID44041_CTGTTTATCTTTACGT	-0.265084	Background
CID44041_GCTTGAAGTCATGCCG	-0.11068	Background
CID44041_TCGGGACAGACAGAGA	-0.323327	Background
CID44041_TCTCATAGTCATGCCG	-0.315048	Background
CID44041_TGCCCTATCAGTTAGC	-0.138352	Background
CID44041_CGCTATCTCACAGGCC	-0.341372	Background
CID44041_AGCAGCCAGCTCCTTC	-0.211499	Background
CID44041_AGGCCACGTCCAGTTA	-0.308163	Background
CID44041_AGGGTGAGTTTACTCT	-0.130729	Background
CID44041_AGTCTTTCATACCATG	-0.331871	Background
CID44041_ATCTACTGTACTTGAC	-0.211743	Background
CID44041_ATCTGCCCAGCATGAG	-0.328536	Background
CID44041_ATCTGCCTCCAAACAC	-0.395676	Background
CID44041_CAGCTGGTCAATAAGG	-0.323112	Background
CID44041_CCACGGAAGACCTTTG	-0.32212	Background
CID44041_CCTCAGTGTAGCTCCG	-0.314785	Background
CID44041_CCTTCCCTCTACTCAT	-0.344377	Background
CID44041_CGAGCACGTCCATGAT	-0.36591	Background
CID44041_CGCTATCTCGAACGGA	-0.351755	Background
CID44041_CGGCTAGAGTATCGAA	-0.113641	Background
CID44041_CGTTAGACAATGAAAC	-0.317175	Background
CID44041_CTGCGGAGTTCGTGAT	-0.21755	Background
CID44041_GAACCTACATGCTAGT	-0.253548	Background
CID44041_GATCGATTCTGACCTC	-0.35431	Background
CID44041_GCGAGAAGTCCGCTGA	-0.305629	Background
CID44041_GGCGACTCAACACCCG	-0.332777	Background
CID44041_GGGTTGCAGATGGCGT	-0.409658	Background
CID44041_TACTTGTAGTCGTACT	-0.145788	Background
CID44041_TGCGCAGCAGCTGCTG	-0.294019	Background
CID44041_TTAGGACCAAGCTGTT	-0.3229	Background
CID44041_TTGCCGTTCAGCGACC	-0.121223	Background
CID44041_TTGTAGGGTTGTCTTT	-0.210518	Background
CID44041_TTTGTCACATCCTTGC	-0.152255	Background
CID44041_ACATGGTTCATGCTCC	-0.201395	Background
CID44041_ACGCAGCTCGCCAAAT	-0.340384	Background
CID44041_CACCACTCACCTGGTG	-0.335624	Background
CID44041_CTTAGGATCTAACTTC	-0.185474	Background
CID44041_GCAGTTAAGGTGTTAA	-0.348024	Background
CID44041_GTATTCTGTACACCGC	-0.136484	Background
CID44041_GTTCTCGCAATCGAAA	-0.342478	Background
CID44041_TATCTCAGTCCGAATT	-0.386983	Background
CID44041_CCCATACAGAAGGACA	-0.377655	Background
CID44041_AGGGTGAGTAACGACG	-0.169042	Background
CID44041_CTTGGCTCAATAGCAA	-0.281328	Background
CID44041_GCAAACTAGTGAACAT	-0.222455	Background
CID44041_TCAGGATAGACCACGA	-0.157612	Background
CID44041_TCGGTAATCCACTGGG	-0.321878	Background
CID44041_CCGGTAGGTCAGAAGC	-0.239078	Background
CID44041_GACTGCGTCATGTCTT	-0.267201	Background
CID44041_CACACAATCTGCCCTA	-0.304512	Background
CID44041_GGACAGAAGTCATCCA	-0.189849	Background
CID44041_AATCGGTGTAGTAGTA	-0.357522	Background
CID44041_ACTTACTCACCGGAAA	-0.310646	Background
CID44041_CACTCCATCCGAATGT	-0.314859	Background
CID44041_GTAGGCCTCTCATTCA	-0.333937	Background
CID44041_GTATCTTGTCTAGAGG	-0.142524	Background
CID44041_ATCCGAAAGAAACGAG	-0.340844	Background
CID44041_CAGAATCAGGCGTACA	-0.358953	Background
CID44041_CCCTCCTGTCGACTGC	-0.338827	Background
CID44041_CGTTAGACACTTGGAT	-0.320172	Background
CID44041_CTAGTGACACTCTGTC	-0.328996	Background
CID44041_CTGATAGGTGTAATGA	-0.184141	Background
CID44041_GGGAATGGTAGAAGGA	-0.370043	Background
CID44041_GGGAATGTCTCTTATG	-0.228408	Background
CID44041_GGGATGAGTGCCTTGG	-0.363755	Background
CID44041_TCAGGTACAGCTTCGG	-0.360001	Background
CID44041_TGACAACAGAAGCCCA	-0.334385	Background
CID44041_ACCAGTACAAGCTGGA	-0.319361	Background
CID44041_CCTAAAGTCGGTGTTA	-0.306893	Background
CID44041_CTTCTCTTCTTGCCGT	-0.31283	Background
CID44041_GAATAAGGTTAAAGTG	-0.255693	Background
CID44041_TGACTTTAGCACAGGT	-0.244913	Background
CID44041_TTGCCGTTCGCGATCG	-0.320461	Background
CID44041_GCTGCGAAGCGTGAGT	-0.333382	Background
CID44041_TCACGAATCATTGCCC	-0.340591	Background
CID44041_CACACTCAGATCCCAT	-0.414047	Background
CID44041_CGATTGAAGCGAAGGG	-0.458717	Background
CID44041_GTATTCTCAAAGGTGC	-0.372533	Background
CID44041_TACTTACGTATCAGTC	-0.394059	Background
CID44041_TCAGGATTCACATAGC	-0.360771	Background
CID44041_TCATTTGTCAAACAAG	-0.408588	Background
CID44041_TGATTTCAGAGACTTA	-0.345962	Background
CID44041_AGGGTGATCACGCATA	-0.0377683	Background
CID44041_CCTATTACATGGTAGG	-0.368434	Background
CID44041_GAAATGAAGCGATAGC	-0.168828	Background
CID44041_TTTATGCAGGCCATAG	-0.0639807	Background
CID44041_ATCCACCCACAGATTC	0.0154958	Background
CID44041_CAGCGACAGCCACGTC	0.00989065	Background
CID44041_TCTTCGGCAGCGTAAG	-0.359106	Background
CID44041_CATATGGCACGAAAGC	-0.0884782	Background
CID44041_CCACGGACAGCTTAAC	0.0554097	Background
CID44041_CTAGTGAAGAGGTAGA	0.0241763	Background
CID44041_GTAGTCAGTATATGAG	-0.462553	Background
CID44041_GTTAAGCGTGTCAATC	-0.296672	Background
CID44041_TACGGTAAGTCATGCT	0.0160124	Background
CID44041_TTTCCTCGTACGACCC	-0.0387415	Background
CID44041_CATGACACATTGAGCT	0.0430812	Background
CID44041_TGGTTCCAGACCACGA	0.0614025	Background
CID44041_TTGACTTGTCTCATCC	0.0405404	Background
CID44041_CTGAAACGTGTGCGTC	0.0350345	Background
CID44041_TGCCCTATCGGCTACG	0.0231557	Background
CID44041_ACTTTCACAGAGTGTG	0.0107044	Background
CID44041_AGTGGGATCTCTAAGG	0.0630913	Background
CID44041_GTGGGTCGTAAACACA	0.0563937	Background
CID44041_TTCTCCTGTTTCCACC	0.0566969	Background
CID44041_AAACGGGTCTTTACAC	0.181023	Background
CID44041_AGAGTGGAGGGAGTAA	0.0223143	Background
CID44041_CATGCCTTCGGAAATA	0.122552	Background
CID44041_CCGGGATCAGGAATCG	-0.00623105	Background
CID44041_CTTAGGAAGAAACCAT	0.010312	Background
CID44041_GTCAAGTGTGTTGGGA	0.0974659	Background
CID44041_TCTTTCCCAAGTCTGT	0.00205283	Background
CID44041_TGCTACCCACGGATAG	0.185527	Background
CID44041_TTGGCAAAGATATGCA	0.190871	Background
CID44041_AAAGATGGTCGCATCG	0.0175641	Background
CID44041_AAATGCCCAATGTTGC	0.151465	Background
CID44041_AACTCAGCAAGCCGCT	-0.0450787	Background
CID44041_AAGGAGCGTGTCGCTG	-0.0636264	Background
CID44041_AAGGTTCAGTGAAGAG	0.031985	Background
CID44041_AAGGTTCTCTCAACTT	-0.0309166	Background
CID44041_ACACCGGAGGCCGAAT	0.000349747	Background
CID44041_ACACTGAGTCCGTGAC	0.0324881	Background
CID44041_ACATCAGAGCTAACTC	-0.000667301	Background
CID44041_ACGATACGTATCACCA	0.0135068	Background
[truncated: 40,513 more rows]

## Sheet: 2.Differential expression genes
names	logfoldchanges	pvals	pvals_adj
MDK	3.72859	0	0
CALD1	3.54064	0	0
MYL9	3.98947	0	0
TPM2	3.9125	0	0
COL6A1	4.51472	0	0
COL6A2	4.35099	0	0
CRIP2	3.00132	0	0
IGFBP7	3.57027	0	0
TM4SF1	3.0453	0	0
FN1	3.53064	0	0
BGN	4.17733	0	0
PALLD	2.91454	0	1.55486e-307
CYR61	3.00613	4.93923e-307	7.7432e-305
COL1A1	3.85031	5.62062e-304	8.18202e-302
FBLIM1	3.15164	6.9032e-298	9.37915e-296
NNMT	3.18807	1.10693e-297	1.40996e-295
COL1A2	3.96985	6.80883e-297	8.16258e-295
FBLN1	3.54845	8.45704e-293	9.57524e-291
SPARC	3.4601	4.70462e-289	5.04632e-287
MAP1B	3.57414	1.45465e-287	1.48228e-285
PRSS23	3.49285	7.22184e-286	7.00863e-284
C1S	2.97814	3.32316e-274	3.07846e-272
KDELR3	3.21945	9.71724e-267	8.61032e-265
PCOLCE	3.67388	9.77989e-266	8.30476e-264
RBPMS	3.21255	1.29479e-248	1.05551e-246
MGP	2.76109	7.88912e-245	6.18385e-243
FKBP10	3.3897	1.27928e-243	9.6562e-242
CERCAM	3.45474	8.9742e-243	6.53194e-241
COL6A3	3.97549	2.17455e-240	1.52818e-238
TGFB1I1	3.71558	4.48435e-239	3.04637e-237
IGFBP4	2.74278	4.01564e-230	2.63996e-228
TIMP3	3.00738	6.94779e-224	4.42487e-222
COL5A2	4.07196	3.80969e-220	2.28357e-218
MYO1B	2.96996	1.5308e-219	8.91363e-218
FSTL1	3.27389	3.76532e-216	2.13159e-214
AK1	2.59936	9.1393e-208	4.90155e-206
CTHRC1	3.43448	1.45655e-207	7.61143e-206
COL3A1	3.46603	4.48313e-205	2.28415e-203
PLOD2	3.75677	8.01928e-204	3.98617e-202
CAV2	2.69451	4.42622e-203	2.14777e-201
CTSK	3.31417	5.91079e-201	2.80144e-199
RND3	2.89916	8.32386e-199	3.85546e-197
RAI14	3.44587	5.25301e-189	2.37903e-187
BCAM	2.66464	2.53841e-188	1.12463e-186
POSTN	3.36747	1.40745e-184	5.97579e-183
THY1	3.77362	6.41188e-182	2.61348e-180
FHL2	2.53977	1.00155e-180	4.00228e-179
FKBP9	2.69793	1.35517e-180	5.31122e-179
EFEMP2	3.43259	6.21733e-179	2.34646e-177
SDC2	2.83343	1.76622e-178	6.54466e-177
PXDN	3.11921	1.34911e-177	4.90979e-176
COL18A1	2.98344	2.48416e-177	8.88195e-176
PRRX1	3.47487	1.11456e-176	3.91632e-175
SOD3	3.12945	2.02542e-173	6.99629e-172
MMP14	2.63236	2.05785e-172	6.98984e-171
DKK3	4.00619	9.79815e-167	3.16962e-165
EHD2	3.38235	1.63947e-166	5.22067e-165
FERMT2	2.5646	1.09116e-164	3.4212e-163
LOXL1	3.92678	2.44358e-161	7.54546e-160
CCDC80	3.20587	3.29277e-158	9.45163e-157
GPC1	3.51767	7.95925e-158	2.25291e-156
UGDH	2.50872	1.25146e-156	3.49381e-155
NOTCH3	2.88505	2.08657e-156	5.74653e-155
TAGLN	2.86253	1.08075e-155	2.93675e-154
PDLIM4	3.30386	8.32166e-152	2.1743e-150
LAMB1	3.12785	2.75112e-151	7.09719e-150
DDR2	3.53281	2.80041e-151	7.13404e-150
MYLK	3.16669	6.24958e-150	1.55325e-148
AZGP1	2.50884	9.74197e-148	2.33578e-146
LAMA4	2.87452	1.16586e-146	2.73106e-145
LAMC1	2.87026	1.42053e-143	3.25285e-142
EMILIN1	4.06175	1.42496e-142	3.22674e-141
RCN3	3.22082	2.56624e-141	5.68477e-140
MFAP2	2.75768	2.95395e-140	6.47328e-139
FBN1	3.47803	4.62915e-138	9.93074e-137
NR2F2	2.54224	1.82828e-136	3.88129e-135
COL5A1	3.85222	1.47822e-133	2.98278e-132
TFPI	2.72998	9.45682e-131	1.85317e-129
AGRN	2.68778	2.3482e-130	4.55774e-129
EFEMP1	2.68244	1.04863e-128	1.99731e-127
CREB3L1	3.786	1.63418e-125	3.05547e-124
PDGFRB	3.32801	4.77014e-121	8.60315e-120
LOXL2	3.62019	6.53954e-119	1.15892e-117
CTGF	2.65101	9.63924e-117	1.69352e-115
TNC	3.59336	1.58309e-116	2.75756e-115
SNX7	2.78073	2.18589e-115	3.77528e-114
P3H4	2.87953	3.35946e-115	5.75343e-114
SRPX	2.78697	8.12055e-114	1.37914e-112
MAP1A	3.52714	1.14306e-113	1.92526e-112
DPYSL3	3.44745	2.41644e-113	4.03664e-112
PLS3	2.73865	2.48287e-110	4.08072e-109
MSRB3	3.37976	1.29289e-107	2.0912e-106
MMP2	2.54432	6.73956e-106	1.08151e-104
SERPINE1	3.50657	1.56567e-105	2.49284e-104
TNFAIP6	2.59036	3.50313e-102	5.44991e-101
ADAM12	3.26381	1.75748e-101	2.71344e-100
LTBP1	3.16692	3.10991e-101	4.7654e-100
OSMR	2.6848	6.78963e-98	1.03263e-96
IGFBP6	2.79456	2.54538e-96	3.84258e-95
BMP1	3.43727	2.73105e-95	4.03325e-94
COL12A1	3.62612	6.0702e-94	8.90004e-93
MMP11	3.80616	2.5381e-92	3.64271e-91
EVA1B	2.52386	1.05385e-91	1.4915e-90
STEAP1	3.02141	1.20323e-91	1.69116e-90
ANTXR1	3.01334	3.42797e-90	4.78507e-89
LINC01116	3.44471	1.17284e-89	1.61504e-88
FRMD6	2.95424	6.88058e-87	9.1056e-86
SNAI2	3.40019	8.76239e-86	1.13024e-84
MRC2	2.68247	1.72089e-85	2.19199e-84
ECM1	2.79895	5.96619e-84	7.32476e-83
LURAP1L	2.50375	1.16137e-83	1.40886e-82
FHL1	2.63767	8.62301e-81	1.00998e-79
FAP	3.42275	4.3791e-80	5.0708e-79
COL8A1	3.2014	5.17762e-80	5.96158e-79
GGT5	2.88987	9.88564e-79	1.11927e-77
SUSD2	3.72562	1.12116e-78	1.26239e-77
ADAMTS12	3.6722	3.31564e-78	3.6925e-77
RAMP1	3.08324	2.07034e-76	2.26847e-75
DLC1	2.57068	6.97266e-75	7.51867e-74
NT5E	3.29643	8.81564e-75	9.45593e-74
NEXN	2.87616	1.47897e-74	1.57809e-73
PTN	2.66185	9.10128e-74	9.56104e-73
ADAMTS2	3.22495	8.10184e-73	8.25578e-72
FEZ1	3.83595	9.27549e-72	9.2664e-71
AARD	2.63823	2.03508e-70	1.99399e-69
NDUFA4L2	2.82045	2.7341e-67	2.54434e-66
TMEM119	3.75883	1.32644e-66	1.2177e-65
PROCR	2.67896	1.97979e-63	1.74668e-62
FJX1	3.51766	2.00973e-62	1.76545e-61
HGF	3.86253	3.54714e-62	3.08934e-61
SULF1	3.81165	4.87811e-62	4.19476e-61
MXRA5	3.17575	1.31398e-60	1.10657e-59
PLAT	2.93146	4.77637e-60	3.97316e-59
A4GALT	2.85045	2.75795e-59	2.25731e-58
HSPB8	3.95988	1.45113e-58	1.16893e-57
COL27A1	3.19668	2.19649e-58	1.75547e-57
CDH11	2.55739	2.44172e-58	1.94384e-57
DKK1	3.31139	1.74972e-57	1.38214e-56
EGFLAM	3.22662	2.32695e-57	1.82397e-56
COL5A3	4.60162	2.9502e-57	2.30365e-56
CCDC102B	3.22023	1.24037e-55	9.5753e-55
AKAP12	2.83671	6.40634e-55	4.90832e-54
LAMB3	2.54233	1.33504e-54	1.01903e-53
AEBP1	2.60911	1.07869e-53	8.17237e-53
CACNA2D1	4.76148	1.01687e-51	7.5359e-51
C1QTNF6	3.374	6.02089e-51	4.42981e-50
MSC	2.67411	2.30434e-50	1.67126e-49
FDCSP	2.68761	1.39679e-48	9.81608e-48
CFB	2.54235	4.07482e-48	2.844e-47
CSPG4	4.8548	6.91697e-45	4.59178e-44
GAL	3.20457	2.03852e-44	1.33157e-43
FSTL3	2.81334	3.64889e-44	2.37586e-43
EDNRA	3.54936	1.15203e-43	7.42984e-43
RAB23	2.89485	1.26155e-43	8.11052e-43
LOX	2.77929	2.0409e-42	1.28772e-41
TGFB3	2.94965	5.78684e-42	3.62879e-41
C11orf96	2.62955	8.1115e-42	5.07093e-41
HOXA10	3.09604	8.46603e-42	5.27638e-41
GPC6	4.56853	1.12477e-41	6.94633e-41
GDF15	3.17549	1.31786e-41	8.08978e-41
COPZ2	3.61627	1.38762e-41	8.4924e-41
TWIST2	3.37033	3.35103e-41	2.03863e-40
GALNT5	5.89363	9.75423e-41	5.86405e-40
CD248	2.59418	2.41888e-39	1.42476e-38
TMEM47	2.50338	2.54616e-39	1.49541e-38
SYDE1	3.1701	2.92633e-39	1.71375e-38
HPGD	2.52778	3.70986e-38	2.14792e-37
NID2	3.6304	3.87788e-38	2.23884e-37
FLNC	4.95423	2.64175e-37	1.50388e-36
FIBIN	3.29398	5.85152e-37	3.29431e-36
TFPI2	3.44327	7.44154e-37	4.16291e-36
NXN	2.99764	8.05914e-37	4.48153e-36
SLIT2	3.35467	1.22069e-36	6.74192e-36
OSR2	3.32873	4.2003e-35	2.27061e-34
BNC2	3.07493	9.01461e-35	4.83468e-34
SPEG	2.85132	1.21781e-34	6.49713e-34
S1PR3	3.06882	1.51637e-33	7.84354e-33
ARHGEF17	2.62444	1.07389e-32	5.48517e-32
PRR16	4.0806	1.39272e-32	7.06063e-32
NTM	4.85337	3.7151e-32	1.86947e-31
SHOX2	3.63099	1.77977e-31	8.76127e-31
PDPN	3.0211	5.77094e-31	2.79363e-30
PTGER3	3.64182	2.03409e-30	9.77709e-30
FOXS1	4.33326	3.71392e-30	1.77675e-29
PCOLCE2	4.27196	3.9609e-30	1.88221e-29
PLCE1	2.89125	3.96206e-30	1.88221e-29
SPOCD1	4.72093	8.55702e-30	4.02753e-29
THBS2	2.75537	1.01808e-28	4.66257e-28
ACTG2	2.73374	1.45856e-28	6.64998e-28
LRRC17	2.74672	1.77608e-27	7.92044e-27
GLIS3	3.67408	3.11644e-27	1.37177e-26
SPTSSB	2.78222	4.43729e-27	1.9406e-26
MRGPRF	3.15966	9.75094e-27	4.25533e-26
GJC1	3.63517	4.72622e-26	2.0278e-25
KCNJ8	4.0113	1.84404e-25	7.76477e-25
MECOM	3.00195	3.32274e-25	1.38765e-24
PRKG1	3.37953	5.24937e-24	2.13537e-23
PCDH9	2.6238	1.22906e-23	4.93075e-23
TMEM158	2.74894	4.08727e-23	1.62059e-22
IRS1	3.07466	6.81067e-23	2.68475e-22
HTRA3	2.95837	2.27986e-22	8.83338e-22
COL7A1	3.72832	5.50987e-22	2.09498e-21
LINC01436	2.55542	6.36251e-22	2.41467e-21
LINC01615	3.90694	6.4737e-22	2.44776e-21
KCNE4	3.512	9.34635e-21	3.42588e-20
GPR176	3.93585	9.44577e-21	3.4561e-20
ALPL	2.54483	6.73147e-20	2.39838e-19
RGS5	2.56645	1.28652e-19	4.55195e-19
TBX2	3.37049	5.90181e-19	2.04905e-18
RGS4	3.99783	6.29727e-19	2.17892e-18
EPDR1	3.34219	7.23483e-19	2.48644e-18
PSORS1C2	4.26087	1.05243e-18	3.59875e-18
TPPP3	2.66023	1.98614e-18	6.73502e-18
NTN4	2.52879	1.46581e-17	4.80278e-17
HEPH	3.22782	4.2489e-17	1.37667e-16
EGFL6	3.00358	5.28477e-17	1.70417e-16
ABCC9	3.99605	8.10246e-17	2.58821e-16
RRAD	2.83582	1.1607e-16	3.69609e-16
S100A3	3.00782	1.18234e-16	3.75913e-16
EN1	3.51235	3.55942e-16	1.11946e-15
FBXL13	3.10188	3.83183e-16	1.20328e-15
C11orf70	2.87477	4.24767e-16	1.32976e-15
MAMDC2	4.0599	7.39873e-16	2.28464e-15
TWIST1	3.15977	8.0054e-16	2.46823e-15
KIF26B	4.21563	1.23587e-15	3.79894e-15
MATN3	4.59866	2.99365e-15	9.13332e-15
PTX3	3.22619	3.38469e-15	1.03109e-14
ANGPT1	3.46405	9.64747e-15	2.88716e-14
STC2	2.52126	1.23319e-14	3.67432e-14
SLC6A9	2.62691	2.01204e-14	5.93422e-14
SCARF2	3.47816	2.40886e-14	7.09431e-14
ITGBL1	2.9446	4.15419e-14	1.21119e-13
MSX1	2.79654	1.07704e-13	3.08722e-13
RAB6B	2.6337	2.94924e-13	8.37124e-13
PDE1A	3.67952	3.8104e-13	1.07856e-12
F2RL2	2.86204	1.48101e-12	4.10654e-12
NLGN2	2.52263	2.99062e-12	8.17008e-12
ASPN	2.52644	3.57614e-12	9.73053e-12
MOCS1	3.1095	1.36837e-11	3.63118e-11
PIP	2.97669	2.48891e-11	6.51143e-11
HIGD1B	3.18314	3.06711e-11	7.9933e-11
COX4I2	3.3607	4.02763e-11	1.04034e-10
COL10A1	3.64528	4.53046e-11	1.16727e-10
HAS2	3.372	5.7559e-11	1.48113e-10
CARMN	2.99568	9.42157e-11	2.40315e-10
HEYL	3.47587	1.58554e-10	3.99422e-10
TMOD1	2.78028	3.81749e-10	9.40755e-10
CYGB	2.91089	4.1565e-10	1.02306e-09
CASP14	2.59414	6.1861e-10	1.50985e-09
RASL12	2.56391	2.5409e-09	5.99346e-09
LRRC49	2.70172	2.68734e-09	6.33156e-09
LYPD1	2.96099	1.06961e-08	2.43017e-08
FAM162B	3.55567	1.21986e-08	2.7623e-08
SGIP1	3.14573	1.39687e-08	3.15961e-08
ITGA11	3.03224	3.61196e-08	7.9926e-08
MMP28	2.66099	4.3805e-08	9.66175e-08
DLX2	3.16155	5.3304e-08	1.16936e-07
CPT1C	2.90237	1.39769e-07	2.99212e-07
HSD11B1	2.72725	1.60775e-07	3.43458e-07
TBX2-AS1	2.81416	3.15628e-07	6.64515e-07
XG	3.09565	3.63169e-07	7.63817e-07
CNTNAP3B	2.73303	5.19861e-07	1.0811e-06
P4HA3	3.14014	5.73432e-07	1.19129e-06
EDIL3	2.72053	1.40674e-06	2.86694e-06
ARHGAP28	2.63261	2.14579e-06	4.30849e-06
SLC45A1	2.63713	1.06466e-05	2.03736e-05
ANKRD30A	2.82541	1.2037e-05	2.29266e-05
SUGCT	2.59489	1.64986e-05	3.11623e-05
BAALC	2.81351	3.59716e-05	6.70111e-05
AGR3	3.2026	3.63731e-05	6.76972e-05
PGR	2.94478	5.22155e-05	9.5956e-05
GABRD	2.58908	9.32862e-05	0.000168693
HAND2	2.54387	0.000254565	0.000442664

## Sheet: 3.SIDISH marker genes
BRCA High-Risk cells marker genes
HES4
AGRN
TNFRSF18
VWA1
ERRFI1
FBLIM1
C1QA
C1QC
ZNF683
SFN
EVA1B
CDC20
CYR61
SNX7
VCAM1
RHOC
PTPN22
CTSK
S100A14
S100A1
EFNA1
CRABP2
SLAMF1
FCER1G
FCGR2A
FCGR3A
OLFML2B
PRRX1
PXDN
KCNS3
EMILIN1
EFEMP1
ANTXR1
CD8A
IGKV4-1
FHL2
MALL
EN1
MARCO
RND3
FRZB
COL3A1
COL5A2
MYO1B
FN1
IGFBP5
SERPINE2
COL6A3
GPC1
STAB1
FAM3D
TMEM45A
CCDC80
TIGIT
FSTL1
MYLK
PLOD2
TM4SF1
RARRES1
SPTSSB
APOD
UCHL1
IGFBP7
FDCSP
JCHAIN
AREG
CXCL9
CXCL10
CXCL11
EMCN
SPRY1
PALLD
HPGD
RAI14
IL7R
GZMA
MAP1B
VCAN
NREP
P4HA2
PDLIM4
EGR1
MZB1
CD14
DPYSL3
SPARC
GABRP
STC2
F13A1
LTB
AIF1
CFB
HLA-DRB1
HLA-DQA1
COL12A1
TPBG
LAMA4
FABP7
CENPW
CTGF
SGK1
SOD2
AGR2
AGR3
FKBP9
CLDN4
HGF
CACNA2D1
STEAP4
STEAP1
GNG11
COL1A2
AZGP1
PCOLCE
SERPINE1
LAMB1
CAV2
HILPDA
MEST
CALD1
TRBC1
TMEM176B
TIMP1
PCSK1N
P2RY10
TMSB15A
BGN
LOXL2
CLU
RBPMS
PLAT
TOX
SULF1
SDC2
CTHRC1
AARD
PTK2
LURAP1L
CDKN2A
AQP3
TPM2
C9orf3
TNC
GSN
AK1
CERCAM
COL5A1
CD81
DKK3
FJX1
CREB3L1
MDK
SERPING1
GLYATL2
MS4A6A
EFEMP2
CTSW
GAL
PRSS23
MMP7
CRYAB
NNMT
TAGLN
THY1
FEZ1
MSRB2
BAMBI
ANKRD30A
DKK1
PRF1
ACTA2
NSMCE4A
VWF
C1S
C1R
KLRB1
GPRC5A
EMP1
MGP
RERG
EPS8
KRT6B
MUCL1
NDUFA4L2
MSRB3
CPM
LYZ
CSRP2
NTN4
SCARB1
POSTN
GPR183
COL4A1
COL4A2
RNASE1
TRAC
MMP14
GZMB
EGLN3
CLEC14A
FERMT2
SERPINA1
CRIP2
IGHG1
IGHV3-21
MAP1A
FBN1
LOXL1
CRABP1
MFGE8
NR2F2
ZG16B
ARL6IP1
PLK1
TGFB1I1
MT2A
MT1E
CRISPLD2
SERPINF1
CD68
CCL5
CCL4
IGFBP4
CCR7
KRT15
FKBP10
COL1A1
PECAM1
BIRC5
CD93
CST3
MYL9
PKIG
SLPI
WFDC2
PLTP
CEBPB
NOTCH3
PLVAP
FXYD3
CD79A
BCAM
APOE
APOC1
C5AR1
EHD2
RCN3
IL4I1
NKG7
TTYH1
ZNF667-AS1
IGLV3-21
DERL3
SMTN
TIMP3
RBFOX2
MAFF
KDELR3
FBLN1
TFF3
TFF1
COL18A1
COL6A1
COL6A2
PSORS1C2
