# Supplementary material for: SIDISH Identifies High-Risk Disease-Associated Cells and Biomarkers by Integrating Single-Cell Depth and Bulk Breadth
Source: Research Square preprint supplement (doi:10.21203/rs.3.rs-5921999/v1), 2025-03-10
Supplement: Supplementary file 5 [file bd7bc77b4a32c921e282ff51.xlsx]

## Sheet: Description
Descriptions
1. Perturbation Scores: Perturbation score for each gene in LUAD scRNA-seq dataset, representing the impact ofknockinh out a specific genes, on the transition of High-Risk cells to Background cells.
2. Marker Genes P value: provides the p-values from the chi-square test for each gene, assessing the statistical significance of these transitions. Significant P values (P < 0.05) indicate genes with a meaningful effect on the transition of High-Risk cells, highlighting their potential relevance as therapeutic targets.

## Sheet: 1. Perturbation Scores
Gene	Perturbation scores
AGRN	63.0952
DVL1	71.4286
MIB2	-0.595238
SKI	69.6429
PEX10	10.7143
TNFRSF14	10.7143
WRAP73	0
ICMT	0
ACOT7	0
DNAJC11	0
ERRFI1	2.38095
ENO1	54.1667
FBXO2	0
FBXO6	0
MIIP	-5.95238
UBR4	0.595238
NBL1	0
CDA	-5.35714
ECE1	35.119
USP48	10.7143
C1QA	0.595238
C1QB	5.95238
ID3	5.35714
GALE	-0.595238
RCAN3	11.3095
MTFR1L	0
CD52	0.595238
SFN	59.5238
IFI6	27.381
LAPTM5	5.95238
SNRNP40	9.52381
TINAGL1	1.78571
PTP4A2	0
SYNC	0
PHC2	26.7857
KIAA0319L	0
CLSPN	25.5952
MAP7D1	0
ZC3H12A	-0.595238
MYCBP	-0.595238
MACF1	0
PABPC4	0
RLF	0
SLC2A1	52.9762
CDC20	41.6667
HYI	-0.595238
UROD	0
PRDX1	-4.16667
MKNK1	32.7381
PDZK1IP1	0
ZCCHC11	-0.595238
YIPF1	-1.19048
TACSTD2	0.595238
JUN	82.1429
GADD45A	57.7381
LRRC40	0
TYW3	0
PIGK	-1.19048
IFI44L	11.3095
C1orf52	0
CYR61	-0.595238
GBP3	0
GBP1	11.9048
GBP2	27.381
GBP4	0
GBP5	12.5
TMED5	0
DR1	2.38095
ABCD3	10.119
F3	34.5238
SLC30A7	-0.595238
SLC25A24	0.595238
STXBP3	4.16667
TMEM167B	0
WDR77	53.5714
SIKE1	15.4762
PIAS3	70.8333
TXNIP	11.9048
HIST2H2BE	70.2381
BOLA1	0
OTUD7B	17.2619
PLEKHO1	0
RPRD2	0.595238
CTSS	8.92857
C1orf56	0
CDC42SE1	0
IVL	0
SPRR2D	0
S100A8	20.8333
S100A7	41.6667
S100A4	14.881
S100A2	0
S100A16	0
INTS3	0
CKS1B	58.3333
MUC1	55.9524
RIT1	0
GLMP	0
CRABP2	13.0952
PRCC	0.595238
PEA15	0
FCER1G	70.8333
HSPA6	11.3095
NUF2	33.3333
TMCO1	1.19048
UCK2	1.19048
RABGAP1L	0
SOAT1	0
TOR1AIP2	-0.595238
QSOX1	0.595238
XPR1	0
STX6	4.7619
IER5	-0.595238
LAMC2	69.6429
SMG7	-1.19048
PTGS2	57.7381
RGS1	37.5
UCHL5	10.7143
DENND1B	61.3095
NEK7	10.7143
UBE2T	13.6905
ADIPOR1	0.595238
CYB5R1	0
TMEM183A	0
BTG2	72.0238
MDM4	0
RBBP5	57.7381
ELK4	0
CD55	-3.57143
LAMB3	57.1429
LINC00467	0
CENPF	33.3333
BPNT1	0
CAPN8	0
TRIM11	14.2857
GALNT2	19.6429
C1orf198	0
EGLN1	32.1429
KCNK1	0
OPN3	0
SDCCAG8	-0.595238
TMEM18	0
ID2	38.6905
HPCAL1	0
SMC6	20.2381
KCNS3	0.595238
SDC1	64.2857
RHOB	66.0714
TP53I3	0
SNX17	35.7143
NRBP1	0
KRTCAP3	0
SLC4A1AP	0
FOSL2	60.7143
PPP1CB	50.5952
TRMT61B	0
SOS1	63.6905
THUMPD2	0
MTA3	17.2619
ZFP36L2	15.4762
EPAS1	43.4524
FBXO11	0
PSME4	56.5476
SPTBN1	26.1905
VRK2	0
PEX13	36.3095
EHBP1	4.16667
PELI1	3.57143
NFU1	0
MXD1	0
TGFA	41.6667
SPR	0
DUSP11	0
RTKN	18.4524
VAMP5	-0.595238
C2orf68	0
SFTPB	1.19048
GNLY	-6.54762
TMEM127	0
ARID5A	0.595238
MITD1	0
RNF149	-0.595238
MIR4435-2HG	0
SLC20A1	0
INSIG2	1.19048
STEAP3	0
RALB	7.7381
CXCR4	40.4762
HNMT	0
SPOPL	0
RND3	0.595238
ITGB6	42.8571
TLK1	-0.595238
FKBP7	0
SSFA2	0
TFPI	23.8095
SLC40A1	0
ASNSD1	0
GLS	0
STK17B	0
GTF3C3	0
ORC2	16.0714
CYP20A1	0
RAPH1	33.9286
RPE	42.2619
BARD1	30.3571
FN1	71.4286
CTDSP1	61.9048
TTLL4	0
ZFAND2B	0
STK16	0
WDFY1	0
IRS1	66.0714
CCL20	25.5952
SP140L	0
CAB39	-3.57143
PDE6D	0
COPS7B	23.8095
MLPH	0
ILKAP	-0.595238
DTYMK	-5.35714
LMCD1	0
THUMPD3-AS1	0
THUMPD3	-0.595238
SETD5	-0.595238
RPUSD3	0
CCDC174	0
ANKRD28	0
TOP2B	20.2381
AZI2	15.4762
TGFBR2	67.8571
CMTM6	0.595238
GLB1	4.16667
CRTAP	33.3333
CTNNB1	82.1429
KIAA1143	0
LTF	-0.595238
KIF9	0.595238
RBM6	0
SEMA3B	27.9762
RASSF1	59.5238
SMIM4	0
PBRM1	19.6429
GLT8D1	0.595238
DCP1A	60.7143
ARF4	1.78571
SLMAP	32.7381
SUCLG2	10.7143
UBA3	-5.95238
FOXP1	61.9048
GBE1	1.19048
DCBLD2	1.19048
NFKBIZ	0
GTPBP8	0
LRRC58	0
IQCB1	-0.595238
CCDC58	-0.595238
DTX3L	-0.595238
PARP14	-0.595238
CCDC14	0.595238
CHCHD6	0
MGLL	0
RPN1	0.595238
COPG1	-0.595238
CDV3	0
NCK1	49.4048
MRAS	22.619
CEP70	0
FAIM	-0.595238
RBP1	60.119
XRN1	21.4286
PLS1	-0.595238
PLOD2	33.9286
TM4SF1	-1.78571
WWTR1	61.3095
MBNL1	1.78571
RARRES1	-4.16667
PRKCI	58.3333
SKIL	58.9286
MFN1	19.0476
DCUN1D1	-2.38095
EIF2B5	-0.595238
DVL3	70.2381
ECE2	-0.595238
RFC4	30.3571
RPL39L	12.5
RTP4	11.3095
HES1	45.8333
TFRC	4.7619
PCYT1A	0
UBXN7	32.1429
IQCG	0
CTBP1	67.8571
MAEA	0
NELFA	0
LRPAP1	19.6429
TMEM128	0
LYAR	6.54762
S100P	0.595238
LAP3	47.0238
MED28	14.2857
SLC34A2	32.1429
FAM114A1	0.595238
UGDH	0.595238
LIMCH1	0
TMEM33	0
CHIC2	0
KIT	41.0714
SRD5A3	0.595238
NMU	0
EXOC1	4.16667
HOPX	1.78571
JCHAIN	-0.595238
DCK	14.881
ANKRD17	0.595238
MTHFD2L	0
AREG	41.6667
CXCL10	28.5714
SEPT11	0.595238
CXCL13	11.9048
ANXA3	-0.595238
ENOPH1	0
PLAC8	0
SPP1	62.5
HERC6	11.3095
PDLIM5	0
LAMTOR3	60.119
DNAJB14	0
PPP3CA	52.381
BDH2	0
MAD2L1	38.6905
LARP1B	-0.595238
SETD7	25
ANAPC10	31.5476
PPID	24.4048
TMA16	0
DDX60	11.3095
CBR4	-0.595238
HMGB2	16.6667
SPCS3	0
CENPU	26.1905
ANKRD37	0.595238
CCDC127	0
SLC12A7	0
C5orf38	0
RAI14	0
NUP155	29.7619
WDR70	-0.595238
C5orf51	0
HMGCS1	10.7143
ITGA2	63.0952
MOCS2	0
SETD9	0
NDUFAF2	0.595238
CCNB1	58.9286
CENPH	-11.3095
MAP1B	22.0238
MRPS27	5.95238
XRCC4	0
VCAN	44.0476
CETN3	10.7143
SLF1	0
GLRX	0
PJA2	0
PGGT1B	0
TMED7	0
TNFAIP8	0
SRFBP1	0
PPIC	27.381
PHAX	10.7143
SLC12A2	0
ISOC1	0
CDC42SE2	0
PDLIM4	41.0714
C5orf56	0
IRF1	51.7857
ZCCHC10	0
TGFBI	42.2619
EGR1	47.619
HARS	-0.595238
DIAPH1	17.8571
YIPF5	0
SPINK1	-0.595238
SPINK5	0
CD74	3.57143
PTTG1	39.2857
DUSP1	68.4524
ERGIC1	0
RPL26L1	8.92857
PRR7	0
HNRNPH1	1.78571
DUSP22	0
NQO2	0
BPHL	0
RREB1	33.3333
SLC35B3	0
EDN1	72.619
ATXN1	0
NUP153	66.0714
CDKAL1	0
MRS2	0
TDP2	33.9286
C6orf62	-0.595238
TRIM38	0
HIST1H1C	38.6905
HIST1H2AC	61.9048
HIST1H2BG	19.6429
HIST1H2AE	17.8571
BTN3A2	0.595238
ZSCAN16-AS1	0
HLA-F	16.6667
HLA-A	42.2619
TUBB	17.8571
IER3	-0.595238
SFTA2	-0.595238
HLA-B	16.6667
HSPA1A	46.4286
HSPA1B	11.3095
C2	-16.0714
HLA-DRB1	12.5
HLA-DQB1	18.4524
TAP2	25
HLA-DMB	17.2619
HLA-DMA	17.2619
BRD2	6.54762
PHF1	9.52381
PIM1	57.7381
TREM1	0.595238
CCND3	57.7381
C6orf132	0
C6orf226	0.595238
PTK7	-0.595238
XPO5	11.9048
VEGFA	80.3571
TMEM63B	0
SUPT3H	0
DST	33.9286
ORC3	11.9048
PNISR	1.19048
ASCC3	0
C6orf203	0
TUBE1	0
MARCKS	0.595238
TSPYL1	0
GOPC	0
GJA1	63.6905
SMPDL3A	0
NCOA7	-1.19048
CENPW	27.381
PTPRK	14.2857
SLC18B1	0
SGK1	17.2619
MYB	58.9286
IFNGR1	30.9524
PHACTR2	0
SHPRH	0
KATNA1	0.595238
ARMT1	0
CNKSR3	0
ARID1B	19.6429
TMEM181	0
SOD2	61.3095
WTAP	0.595238
QKI	0
RNASET2	-0.595238
COX19	-0.595238
ZFAND2A	0
INTS1	0
EIF3B	5.35714
AIMP2	0
C1GALT1	19.6429
ARL4A	0
AGR2	10.7143
AGR3	0
TRA2A	0
NT5C3A	-4.7619
STARD3NL	-2.38095
MRPL32	18.4524
YKT6	-0.595238
PURB	0
IGFBP3	35.7143
UPP1	-5.35714
MRPS17	0.595238
SUMF2	-0.595238
TMEM248	0
SBDS	0
BCL7B	2.38095
POR	60.7143
TMEM120A	0
SEMA3C	27.9762
TP53TG1	0.595238
STEAP1	0
SAMD9	0.595238
SAMD9L	11.3095
BET1	12.5
BAIAP2L1	0.595238
TAF6	25
MOSPD3	0.595238
TRIP6	68.4524
FIS1	19.0476
DNAJB9	0
CAV2	-1.19048
TSPAN12	0
ZNF800	0
HILPDA	0
CALU	0
MKLN1	0
BPGM	42.2619
CALD1	11.3095
C7orf49	0.595238
PTN	36.9048
ZC3HAV1	0
CASP2	10.7143
EZH2	63.0952
PDIA4	-4.7619
ESYT2	0
WDR60	0
ARSD	-0.595238
HCCS	36.3095
PRPS2	0.595238
RAB9A	-0.595238
SAT1	2.97619
DYNLT3	0
TIMP1	42.8571
WDR13	0
WDR45	-1.19048
PLP2	-0.595238
TSR2	6.54762
MSN	29.7619
IGBP1	32.7381
XIST	1.19048
MAGT1	0.595238
SH3BGRL	0
TIMM8A	-0.595238
ARMCX3	0
TCEAL4	0
TSC22D3	0.595238
PLS3	0
IL13RA1	26.7857
XIAP	56.5476
FMR1	29.1667
HMGB3	-0.595238
IRAK1	50
FLNA	51.7857
UBL4A	42.2619
FAM3A	0
G6PD	50.5952
AGPAT5	0.595238
DEFB1	-8.33333
CLDN23	0
CTSB	14.2857
SLC25A37	0
DPYSL2	0
CCDC25	0
GTF2E2	13.6905
PPP2CB	64.881
ERLIN2	0
LSM1	11.3095
TM2D2	0.595238
ADAM9	0
IDO1	22.619
THAP1	-0.595238
PCMTD1	0
CHCHD7	-0.595238
SDR16C5	12.5
SDCBP	35.119
ASPH	60.7143
GGH	-1.19048
MTFR1	0
RRS1	11.9048
RDH10	14.881
STAU2	0
UBE2W	-5.35714
FABP5	44.6429
CHMP4C	14.2857
RIPK2	58.3333
MTERF3	8.92857
STK3	33.3333
CTHRC1	50
EMC2	0
EBAG9	0
TRPS1	0
UTP23	11.9048
FAM83A	2.38095
C8orf76	0
FBXO32	-1.19048
FAM91A1	0.595238
SQLE	1.19048
FAM84B	0
EFR3A	0
NDRG1	23.2143
EPPK1	0
PLEC	45.8333
SMARCA2	41.6667
VLDLR	63.0952
TTC39B	0
APTX	0
B4GALT1	-1.19048
AQP3	-1.19048
DCAF12	0.595238
NUDT2	0
RPP25L	7.7381
CA9	55.3571
CREB3	60.7143
POLR1E	18.4524
NMRK1	0
RFK	0
ZCCHC6	0
CTSL	8.92857
CKS2	35.7143
GADD45G	25.5952
MFSD14B	0
FBP1	0
C9orf3	0
SLC44A1	0
TMEM245	0
PTGR1	0.595238
UGCG	26.7857
SLC31A1	-0.595238
PSMD5	57.7381
GSN	42.8571
STOM	41.6667
MAPKAP1	60.7143
FAM129B	0
PTRH1	0
DPM2	-1.19048
LCN2	42.8571
SPTAN1	41.0714
ZDHHC12	0
NTMT1	-0.595238
TOR1A	-0.595238
FNBP1	0
ASS1	44.0476
SURF2	0
PAEP	-1.19048
TMEM141	0
RABL6	0.595238
TRAF2	55.9524
FBXW5	0.595238
CLIC3	0
TMEM203	0
IFITM2	27.381
IFITM1	26.1905
PNPLA2	0
TOLLIP	3.57143
CD81	8.33333
TSSC4	10.119
PHLDA2	0.595238
PGAP2	0
WEE1	16.0714
ADM	0
SAA1	42.8571
LDHA	63.0952
IMMP1L	0.595238
HIPK3	0
TTC17	0
HSD17B12	0
CD82	-0.595238
CKAP5	4.16667
PTPMT1	0
FAM111B	0
FAM111A	0
B3GAT3	35.7143
TTC9C	0.595238
TMEM223	-0.595238
ATL3	0.595238
MARK2	28.5714
MACROD1	0
TRPT1	-0.595238
NUDT22	-0.595238
ZFPL1	0
DPF2	19.6429
SIPA1	0
RNASEH2C	10.7143
SART1	10.119
CST6	-4.16667
RCE1	0
RHOD	30.9524
RPS6KB2	79.7619
CDK2AP2	-1.19048
CCND1	76.1905
STARD10	0
POLD3	-8.33333
RAB30-AS1	-0.595238
PCF11	3.57143
CCDC90B	0
CREBZF	36.3095
PRSS23	1.19048
SMCO4	-0.595238
CCDC82	-0.595238
BIRC3	17.2619
DCUN1D5	0.595238
CASP4	0
CARD16	0.595238
AASDHPPT	-0.595238
ACAT1	36.3095
FDX1	0
C11orf1	0
REXO2	0.595238
MPZL2	0.595238
CD3D	40.4762
TRAPPC4	36.9048
HYOU1	-0.595238
H2AFX	62.5
DCPS	-1.19048
APLP2	1.78571
ST14	0.595238
ZBTB44	0.595238
LARP4B	5.35714
KLF6	60.7143
CALML5	-1.19048
USP6NL	26.1905
CAMK1D	0
SUV39H2	-0.595238
VIM	63.0952
NSUN6	0
NRP1	62.5
SGMS1	27.381
CDK1	77.9762
DNAJC12	0
HERC4	0
SRGN	-6.54762
TSPAN15	0
P4HA1	61.9048
ECD	10.119
PLAU	45.2381
SNCG	0.595238
ATAD1	10.119
IFIT3	24.4048
IFIT1	26.1905
KIF20B	19.6429
RPP30	25.5952
PCGF5	7.7381
TNKS2	0
BLOC1S2	0
FBXL15	-0.595238
ACTR1A	0
BORCS7	0
PDCD4	0
SHOC2	39.881
OAT	28.5714
BNIP3	19.6429
CCDC77	0
NINJ2	0
RAD51AP1	30.3571
TAPBPL	25
SPSB2	0
C1S	-14.881
C1R	-14.881
NECAP1	0
CLEC2B	0.595238
GABARAPL1	16.0714
ETV6	0
GPRC5A	0
EMP1	0
ATF7IP	0
PLBD1	0
ARHGDIB	75
RERG	0
RECQL	0
GOLT1B	0.595238
ETNK1	0
TM7SF3	0
KIAA1551	0
TWF1	-0.595238
TMEM106C	-0.595238
DDX23	10.119
TUBA1A	29.7619
MCRS1	23.2143
AQP5	0
SMAGP	0
KRT7	-2.97619
PCBP2	1.78571
ATF7	60.7143
MUCL1	19.6429
SARNP	0
PYM1	0.595238
CDK2	61.9048
RAB5B	3.57143
RPL41	14.881
STAT2	32.7381
PRIM1	16.0714
NDUFA4L2	11.9048
R3HDM2	0
DDIT3	60.119
LRIG3	0
SRGAP1	0
TBK1	24.4048
DYRK2	0
CPM	0
LYZ	-0.595238
YEATS4	18.4524
PHLDA1	4.7619
C12orf29	0
TMTC3	0
DUSP6	45.8333
ATP2B1	0.595238
EEA1	32.7381
ELK3	0
SCYL2	0.595238
C12orf75	-1.78571
CKAP4	0
CORO1C	0
UBE3B	0
ANKRD13A	0
C12orf76	0
ALDH2	0
MED13L	14.2857
WSB2	0
TAOK3	4.16667
RAB35	17.8571
PXN	67.8571
RNF10	0.595238
SPPL3	0.595238
C12orf43	0
P2RX4	0
RNF34	0
RHOF	0
BCL7A	19.6429
CLIP1	-17.2619
SNRNP35	0
EIF2B1	-0.595238
PUS1	0
PXMP2	10.119
PSPC1	0
MTIF3	5.95238
ALOX5AP	0
HSPH1	17.2619
RFC3	13.6905
MRPS31	5.95238
WBP4	10.119
DNAJC15	0
NUDT15	0
RB1	80.9524
CKAP2	30.3571
KLF5	69.0476
RBM26	0
TEX30	0
LAMP1	8.92857
TMCO3	0
RNASE1	0.595238
LRP10	35.119
PABPN1	0.595238
DCAF11	25
GZMB	-5.95238
SCFD1	13.0952
STRN3	32.7381
EGLN3	32.1429
SPTSSA	-1.19048
EAPP	1.19048
NFKBIA	75
MBIP	2.38095
SFTA3	0.595238
FOXA1	52.381
MIS18BP1	26.7857
ATP5S	0
ERO1A	1.78571
GNPNAT1	0
MAPK1IP1L	0
JKAMP	0
PPM1A	61.3095
SIX1	0
PPP2R5E	64.2857
ATP6V1D	-10.7143
ZFP36L1	60.7143
PSEN1	57.7381
NPC2	-2.38095
ISCA2	0
EIF2B2	-0.595238
IFT43	0
IRF2BPL	0
CCDC88C	50
PPP4R3A	0
LGMN	4.16667
IFI27L1	0
IFI27L2	0
GSKIP	0
VRK1	-1.19048
CCNK	67.2619
WARS	-0.595238
TNFAIP2	0
ZFYVE21	0
AKT1	81.5476
CRIP1	1.78571
IGHG4	0
IGHA1	0
IGHG1	-0.595238
IGHG3	-0.595238
IGHM	-0.595238
NIPA2	17.2619
CYFIP1	60.7143
ZNF770	0
KNSTRN	8.33333
GCHFR	0
RHOV	0
CHP1	0
NUSAP1	35.7143
CCNDBP1	0
MFAP1	10.119
CTDSPL2	0
C15orf48	1.78571
BLOC1S6	0
SPPL2A	0.595238
WDR72	0
RAB27A	0
CCNB2	44.6429
TPM1	11.3095
FAM96A	-0.595238
SNX1	58.3333
MAP2K1	79.7619
SNAPC5	0
C15orf61	0
LARP6	0
ADPGK	41.6667
FBXO22	33.9286
CTSH	2.38095
TMED3	0
ST20	0
C15orf40	0
BTBD1	0
NMB	0.595238
ISG20	27.381
MESP1	0
PRC1	35.7143
MEF2A	69.0476
PIGQ	-1.19048
MSRB1	0
GFER	26.7857
SNHG19	0.595238
TRAF7	0.595238
PDPK1	66.0714
FLYWCH2	0
HCFC1R1	2.38095
NAA60	0.595238
C16orf72	0
EMP2	-0.595238
NUBP1	0
SOCS1	29.7619
ARL6IP1	1.19048
TMEM159	0.595238
NUPR1	5.95238
PHKG2	-1.19048
HSD3B7	0
BCKDK	0.595238
PRSS8	0
DNAJA2	17.2619
ITFG1	0
MT2A	-2.97619
MT1F	0
MT1X	-2.97619
HERPUD1	1.19048
ARL2BP	0
USB1	0
CFAP20	0
CNOT1	17.8571
GOT2	54.7619
CKLF	0.595238
NUTF2	57.1429
NFATC3	58.9286
SLC7A6OS	0
CDH3	54.1667
CDH1	68.4524
CHTF8	-6.54762
NQO1	36.3095
AP1G1	0
CMC2	-0.595238
CENPN	30.9524
COTL1	0
USP10	0
EMC8	0
MAP1LC3B	29.1667
CYBA	61.3095
SPG7	0
MYO1C	19.6429
RPA1	26.1905
EMC6	0
ARRB2	47.0238
CXCL16	10.119
PFN1	29.7619
RABEP1	4.7619
TMEM256	1.19048
CD68	-14.2857
MPDU1	-1.19048
RANGRF	35.119
STX8	0
PEMT	0
SREBF1	12.5
SPECC1	0
MAP2K3	9.52381
WSB1	7.14286
TMEM97	-0.595238
KIAA0100	0
SUPT6H	23.2143
NSRP1	0
CPD	0
RHOT1	8.92857
SLFN5	0
CCL5	66.6667
CCL18	0
CCL4	45.2381
ACACA	10.7143
PPP1R1B	33.9286
ERBB2	59.5238
TOP2A	69.6429
IGFBP4	0
KRT17	-1.19048
IFI35	27.381
TMEM101	0
SLC25A39	0.595238
NSF	-0.595238
CDC27	60.119
HOXB7	0
UBE2Z	-5.95238
ITGA3	60.7143
COL1A1	57.7381
ANKRD40	0
TOB1	39.881
COX11	-0.595238
TRIM37	0
YPEL2	0.595238
PTRH2	-0.595238
MED13	14.2857
METTL2A	1.19048
ERN1	52.381
SNHG25	0
KPNA2	64.2857
SLC9A3R1	53.5714
NAT9	0
MIF4GD	0
ITGB4	67.8571
TRIM47	0
ACOX1	59.5238
TMC6	0
SYNGR2	0
TK1	28.5714
BIRC5	57.1429
SOCS3	52.9762
TIMP2	1.19048
CANT1	0
SLC38A10	0
ARL16	0
FASN	1.19048
CCDC57	0
SLC16A3	0.595238
CD7	0.595238
OGFOD3	0
TGIF1	61.3095
RAB31	0
CHMP1B	0.595238
TUBB6	29.7619
IMPACT	0
DSC2	0
GALNT1	19.6429
SMAD2	80.3571
PMAIP1	17.2619
SERPINB4	0
TRIB3	60.119
CDS2	0.595238
GPCPD1	0
OVOL2	0
RIN2	8.92857
PYGB	1.19048
ID1	30.9524
BCL2L1	56.5476
TPX2	35.7143
TM9SF4	0.595238
MAP1LC3A	-2.38095
EDEM2	0
NFS1	0
MYL9	46.4286
SAMHD1	26.1905
RALGAPB	0
MAFB	60.7143
PKIG	0
STK4	24.4048
SLPI	-5.95238
SDC4	54.1667
WFDC2	7.14286
WFDC3	-0.595238
UBE2C	40.4762
TNNC2	-0.595238
TMEM189	0
CEBPB	82.7381
PARD6B	30.3571
ADNP	0
AURKA	56.5476
TFAP2C	40.4762
PMEPA1	61.9048
STX16	-0.595238
PRELID3B	-0.595238
PHACTR3	0.595238
SYCP2	0
RGS19	18.4524
MISP	0
CFD	0
WDR18	10.7143
ABCA7	12.5
GPX4	14.881
MIDN	0.595238
MKNK2	1.78571
AP3D1	0
ZBTB7A	0
SH3GL1	-0.595238
PTPRS	54.7619
GPR108	0
INSR	65.4762
RPS28	30.3571
ANGPTL4	14.2857
ICAM1	22.619
ICAM3	-2.97619
LDLR	13.0952
ACP5	0
ADGRE5	0
NOTCH3	36.3095
RAB8A	-1.19048
USE1	-0.595238
JUND	60.7143
GDF15	29.1667
BORCS8	0
NR2C2AP	-0.595238
PDCD2L	0
FXYD3	-0.595238
LSR	0.595238
U2AF1L4	0
HCST	0.595238
TYROBP	29.7619
C19orf33	5.95238
FAM98C	0
ZFP36	47.619
SERTAD1	12.5
SERTAD3	0
CEACAM6	42.8571
DEDD2	0
CEACAM1	63.0952
ZNF576	0.595238
PVR	0.595238
BCL3	33.9286
CBLC	-0.595238
BCAM	0
APOE	46.4286
APOC1	10.7143
GEMIN7	9.52381
VASP	60.119
EMP3	0
BCAT2	0.595238
PLEKHA4	0
TEAD2	32.7381
RCN3	0
RRAS	25.5952
NAPSA	-20.8333
JOSD2	0
NKG7	-6.54762
TFPT	-1.78571
EPS8L1	0
ZNF544	0
RPS4Y1	0
BCL2L13	5.95238
PEX26	10.119
DGCR2	0
SLC25A1	0
MRPL40	18.4524
DGCR6L	0
MED15	61.3095
SNAP29	0
CRKL	42.2619
THAP7	0
YDJC	0
SDF2L1	-0.595238
IGLC2	-0.595238
IGLC3	-1.19048
HSCB	0
ZMAT5	0
TBC1D10A	32.1429
PIK3IP1	1.78571
YWHAH	58.3333
TIMP3	0
HMOX1	60.7143
MB	0
APOL3	0
APOL4	0
APOL2	0
APOL1	12.5
IFT27	0
LGALS1	4.16667
CSNK1E	54.7619
CBY1	55.3571
CBX6	7.7381
APOBEC3C	0
DESI1	0
CENPM	30.3571
ARFGAP3	-0.595238
BIK	17.2619
PRR34-AS1	0
TBC1D22A	0
CRELD2	-0.595238
SCO2	-1.19048
MRPS6	17.8571
SLC5A3	1.19048
CBR1	0
ETS2	58.9286
BRWD1	0
BACE2	0
TFF3	57.1429
PDXK	-0.595238
CSTB	-7.14286
FAM207A	0
MT-ATP6	-10.7143
MT-ND3	-10.7143

## Sheet: 2. Marker Genes P value
AGRN	2.17723e-12
DVL1	2.29314e-16
MIB2	1
SKI	1.93693e-15
PEX10	0.33088
TNFRSF14	0.33088
WRAP73	1
ICMT	1
ACOT7	1
DNAJC11	1
ERRFI1	0.866518
ENO1	5.29209e-09
FBXO2	1
FBXO6	1
MIIP	0.621038
UBR4	1
NBL1	1
CDA	0.659895
ECE1	0.000392245
USP48	0.33088
C1QA	1
C1QB	0.610982
ID3	0.651636
GALE	1
RCAN3	0.302495
MTFR1L	1
CD52	1
SFN	6.1894e-11
IFI6	0.00713512
LAPTM5	0.610982
SNRNP40	0.392344
TINAGL1	0.910908
PTP4A2	1
SYNC	1
PHC2	0.00863124
KIAA0319L	1
CLSPN	0.0124653
MAP7D1	1
ZC3H12A	1
MYCBP	1
MACF1	1
PABPC4	1
RLF	1
SLC2A1	1.30394e-08
CDC20	1.70059e-05
HYI	1
UROD	1
PRDX1	0.740673
MKNK1	0.00104546
PDZK1IP1	1
ZCCHC11	1
YIPF1	0.955701
TACSTD2	1
JUN	6.4683e-23
GADD45A	2.93449e-10
LRRC40	1
TYW3	1
PIGK	0.955701
IFI44L	0.302495
C1orf52	1
CYR61	1
GBP3	1
GBP1	0.275699
GBP2	0.00713512
GBP4	1
GBP5	0.250494
TMED5	1
DR1	0.866518
ABCD3	0.360838
F3	0.000505039
SLC30A7	1
SLC25A24	1
STXBP3	0.735642
TMEM167B	1
WDR77	8.33844e-09
SIKE1	0.147752
PIAS3	4.72175e-16
TXNIP	0.275699
HIST2H2BE	9.61557e-16
BOLA1	1
OTUD7B	0.103353
PLEKHO1	1
RPRD2	1
CTSS	0.425361
C1orf56	1
CDC42SE1	1
IVL	1
SPRR2D	1
S100A8	0.0458579
S100A7	1.70059e-05
S100A4	0.165299
S100A2	1
S100A16	1
INTS3	1
CKS1B	1.76152e-10
MUC1	1.29159e-09
RIT1	1
GLMP	1
CRABP2	0.226874
PRCC	1
PEA15	1
FCER1G	4.72175e-16
HSPA6	0.302495
NUF2	0.000824469
TMCO1	0.955448
UCK2	0.955448
RABGAP1L	1
SOAT1	1
TOR1AIP2	1
QSOX1	1
XPR1	1
STX6	0.693229
IER5	1
LAMC2	1.93693e-15
SMG7	0.955701
PTGS2	2.93449e-10
RGS1	0.000135387
UCHL5	0.33088
DENND1B	1.20841e-11
NEK7	0.33088
UBE2T	0.204821
ADIPOR1	1
CYB5R1	1
TMEM183A	1
BTG2	1.10127e-16
MDM4	1
RBBP5	2.93449e-10
ELK4	1
CD55	0.782404
LAMB3	4.84832e-10
LINC00467	1
CENPF	0.000824469
BPNT1	1
CAPN8	1
TRIM11	0.184308
GALNT2	0.0610311
C1orf198	1
EGLN1	0.00131912
KCNK1	1
OPN3	1
SDCCAG8	1
TMEM18	1
ID2	7.69937e-05
HPCAL1	1
SMC6	0.0530046
KCNS3	1
SDC1	6.6319e-13
RHOB	1.03771e-13
TP53I3	1
SNX17	0.000303059
NRBP1	1
KRTCAP3	1
SLC4A1AP	1
FOSL2	2.10136e-11
PPP1CB	7.24244e-08
TRMT61B	1
SOS1	1.20729e-12
THUMPD2	1
MTA3	0.103353
ZFP36L2	0.147752
EPAS1	6.40283e-06
FBXO11	1
PSME4	7.94525e-10
SPTBN1	0.0103952
VRK2	1
PEX13	0.000232919
EHBP1	0.735642
PELI1	0.778749
NFU1	1
MXD1	1
TGFA	1.70059e-05
SPR	1
DUSP11	1
RTKN	0.0800071
VAMP5	1
C2orf68	1
SFTPB	0.955448
GNLY	0.583311
TMEM127	1
ARID5A	1
MITD1	1
RNF149	1
MIR4435-2HG	1
SLC20A1	1
INSIG2	0.955448
STEAP3	1
RALB	0.495718
CXCR4	3.16569e-05
HNMT	1
SPOPL	1
RND3	1
ITGB6	8.92096e-06
TLK1	1
FKBP7	1
SSFA2	1
TFPI	0.0209512
SLC40A1	1
ASNSD1	1
GLS	1
STK17B	1
GTF3C3	1
ORC2	0.131617
CYP20A1	1
RAPH1	0.000646927
RPE	1.23541e-05
BARD1	0.00257345
FN1	2.29314e-16
CTDSP1	6.88735e-12
TTLL4	1
ZFAND2B	1
STK16	1
WDFY1	1
IRS1	1.03771e-13
CCL20	0.0124653
SP140L	1
CAB39	0.782404
PDE6D	1
COPS7B	0.0209512
MLPH	1
ILKAP	1
DTYMK	0.659895
LMCD1	1
THUMPD3-AS1	1
THUMPD3	1
SETD5	1
RPUSD3	1
CCDC174	1
ANKRD28	1
TOP2B	0.0530046
AZI2	0.147752
TGFBR2	1.48514e-14
CMTM6	1
GLB1	0.735642
CRTAP	0.000824469
CTNNB1	6.4683e-23
KIAA1143	1
LTF	1
KIF9	1
RBM6	1
SEMA3B	0.0058721
RASSF1	6.1894e-11
SMIM4	1
PBRM1	0.0610311
GLT8D1	1
DCP1A	2.10136e-11
ARF4	0.910908
SLMAP	0.00104546
SUCLG2	0.33088
UBA3	0.621038
FOXP1	6.88735e-12
GBE1	0.955448
DCBLD2	0.955448
NFKBIZ	1
GTPBP8	1
LRRC58	1
IQCB1	1
CCDC58	1
DTX3L	1
PARP14	1
CCDC14	1
CHCHD6	1
MGLL	1
RPN1	1
COPG1	1
CDV3	1
NCK1	1.63496e-07
MRAS	0.0290083
CEP70	1
FAIM	1
RBP1	3.62211e-11
XRN1	0.0395213
PLS1	1
PLOD2	0.000646927
TM4SF1	0.911663
WWTR1	1.20841e-11
MBNL1	0.910908
RARRES1	0.740673
PRKCI	1.76152e-10
SKIL	1.0486e-10
MFN1	0.0700081
DCUN1D1	0.868017
EIF2B5	1
DVL3	9.61557e-16
ECE2	1
RFC4	0.00257345
RPL39L	0.250494
RTP4	0.302495
HES1	1.59646e-06
TFRC	0.693229
PCYT1A	1
UBXN7	0.00131912
IQCG	1
CTBP1	1.48514e-14
MAEA	1
NELFA	1
LRPAP1	0.0610311
TMEM128	1
LYAR	0.571377
S100P	1
LAP3	7.67112e-07
MED28	0.184308
SLC34A2	0.00131912
FAM114A1	1
UGDH	1
LIMCH1	1
TMEM33	1
CHIC2	1
KIT	2.32706e-05
SRD5A3	1
NMU	1
EXOC1	0.735642
HOPX	0.910908
JCHAIN	1
DCK	0.165299
ANKRD17	1
MTHFD2L	1
AREG	1.70059e-05
CXCL10	0.00481088
SEPT11	1
CXCL13	0.275699
ANXA3	1
ENOPH1	1
PLAC8	1
SPP1	3.89015e-12
HERC6	0.302495
PDLIM5	1
LAMTOR3	3.62211e-11
DNAJB14	1
PPP3CA	2.02387e-08
BDH2	1
MAD2L1	7.69937e-05
LARP1B	1
SETD7	0.0148835
ANAPC10	0.00165626
PPID	0.0176957
TMA16	1
DDX60	0.302495
CBR4	1
HMGB2	0.116838
SPCS3	1
CENPU	0.0103952
ANKRD37	1
CCDC127	1
SLC12A7	1
C5orf38	1
RAI14	1
NUP155	0.003185
WDR70	1
C5orf51	1
HMGCS1	0.33088
ITGA2	2.17723e-12
MOCS2	1
SETD9	1
NDUFAF2	1
CCNB1	1.0486e-10
CENPH	0.328715
MAP1B	0.0339267
MRPS27	0.610982
XRCC4	1
VCAN	4.56729e-06
CETN3	0.33088
SLF1	1
GLRX	1
PJA2	1
PGGT1B	1
TMED7	1
TNFAIP8	1
SRFBP1	1
PPIC	0.00713512
PHAX	0.33088
SLC12A2	1
ISOC1	1
CDC42SE2	1
PDLIM4	2.32706e-05
C5orf56	1
IRF1	3.1182e-08
ZCCHC10	1
TGFBI	1.23541e-05
EGR1	5.26523e-07
HARS	1
DIAPH1	0.0910988
YIPF5	1
SPINK1	1
SPINK5	1
CD74	0.778749
PTTG1	5.75788e-05
DUSP1	7.61109e-15
ERGIC1	1
RPL26L1	0.425361
PRR7	1
HNRNPH1	0.910908
DUSP22	1
NQO2	1
BPHL	1
RREB1	0.000824469
SLC35B3	1
EDN1	5.22902e-17
ATXN1	1
NUP153	1.03771e-13
CDKAL1	1
MRS2	1
TDP2	0.000646927
C6orf62	1
TRIM38	1
HIST1H1C	7.69937e-05
HIST1H2AC	6.88735e-12
HIST1H2BG	0.0610311
HIST1H2AE	0.0910988
BTN3A2	1
ZSCAN16-AS1	1
HLA-F	0.116838
HLA-A	1.23541e-05
TUBB	0.0910988
IER3	1
SFTA2	1
HLA-B	0.116838
HSPA1A	1.11027e-06
HSPA1B	0.302495
C2	0.162752
HLA-DRB1	0.250494
HLA-DQB1	0.0800071
TAP2	0.0148835
HLA-DMB	0.103353
HLA-DMA	0.103353
BRD2	0.571377
PHF1	0.392344
PIM1	2.93449e-10
TREM1	1
CCND3	2.93449e-10
C6orf132	1
C6orf226	1
PTK7	1
XPO5	0.275699
VEGFA	1.07334e-21
TMEM63B	1
SUPT3H	1
DST	0.000646927
ORC3	0.275699
PNISR	0.955448
ASCC3	1
C6orf203	1
TUBE1	1
MARCKS	1
TSPYL1	1
GOPC	1
GJA1	1.20729e-12
SMPDL3A	1
NCOA7	0.955701
CENPW	0.00713512
PTPRK	0.184308
SLC18B1	1
SGK1	0.103353
MYB	1.0486e-10
IFNGR1	0.00206949
PHACTR2	1
SHPRH	1
KATNA1	1
ARMT1	1
CNKSR3	1
ARID1B	0.0610311
TMEM181	1
SOD2	1.20841e-11
WTAP	1
QKI	1
RNASET2	1
COX19	1
ZFAND2A	1
INTS1	1
EIF3B	0.651636
AIMP2	1
C1GALT1	0.0610311
ARL4A	1
AGR2	0.33088
AGR3	1
TRA2A	1
NT5C3A	0.699804
STARD3NL	0.868017
MRPL32	0.0800071
YKT6	1
PURB	1
IGFBP3	0.000303059
UPP1	0.659895
MRPS17	1
SUMF2	1
TMEM248	1
SBDS	1
BCL7B	0.866518
POR	2.10136e-11
TMEM120A	1
SEMA3C	0.0058721
TP53TG1	1
STEAP1	1
SAMD9	1
SAMD9L	0.302495
BET1	0.250494
BAIAP2L1	1
TAF6	0.0148835
MOSPD3	1
TRIP6	7.61109e-15
FIS1	0.0700081
DNAJB9	1
CAV2	0.955701
TSPAN12	1
ZNF800	1
HILPDA	1
CALU	1
MKLN1	1
BPGM	1.23541e-05
CALD1	0.302495
C7orf49	1
PTN	0.000178059
ZC3HAV1	1
CASP2	0.33088
EZH2	2.17723e-12
PDIA4	0.699804
ESYT2	1
WDR60	1
ARSD	1
HCCS	0.000232919
PRPS2	1
RAB9A	1
SAT1	0.82242
DYNLT3	1
TIMP1	8.92096e-06
WDR13	1
WDR45	0.955701
PLP2	1
TSR2	0.571377
MSN	0.003185
IGBP1	0.00104546
XIST	0.955448
MAGT1	1
SH3BGRL	1
TIMM8A	1
ARMCX3	1
TCEAL4	1
TSC22D3	1
PLS3	1
IL13RA1	0.00863124
XIAP	7.94525e-10
FMR1	0.00392348
HMGB3	1
IRAK1	1.092e-07
FLNA	3.1182e-08
UBL4A	1.23541e-05
FAM3A	1
G6PD	7.24244e-08
AGPAT5	1
DEFB1	0.477584
CLDN23	1
CTSB	0.184308
SLC25A37	1
DPYSL2	1
CCDC25	1
GTF2E2	0.204821
PPP2CB	3.60851e-13
ERLIN2	1
LSM1	0.302495
TM2D2	1
ADAM9	1
IDO1	0.0290083
THAP1	1
PCMTD1	1
CHCHD7	1
SDR16C5	0.250494
SDCBP	0.000392245
ASPH	2.10136e-11
GGH	0.955701
MTFR1	1
RRS1	0.275699
RDH10	0.165299
STAU2	1
UBE2W	0.659895
FABP5	3.23773e-06
CHMP4C	0.184308
RIPK2	1.76152e-10
MTERF3	0.425361
STK3	0.000824469
CTHRC1	1.092e-07
EMC2	1
EBAG9	1
TRPS1	1
UTP23	0.275699
FAM83A	0.866518
C8orf76	1
FBXO32	0.955701
FAM91A1	1
SQLE	0.955448
FAM84B	1
EFR3A	1
NDRG1	0.0247032
EPPK1	1
PLEC	1.59646e-06
SMARCA2	1.70059e-05
VLDLR	2.17723e-12
TTC39B	1
APTX	1
B4GALT1	0.955701
AQP3	0.955701
DCAF12	1
NUDT2	1
RPP25L	0.495718
CA9	2.083e-09
CREB3	2.10136e-11
POLR1E	0.0800071
NMRK1	1
RFK	1
ZCCHC6	1
CTSL	0.425361
CKS2	0.000303059
GADD45G	0.0124653
MFSD14B	1
FBP1	1
C9orf3	1
SLC44A1	1
TMEM245	1
PTGR1	1
UGCG	0.00863124
SLC31A1	1
PSMD5	2.93449e-10
GSN	8.92096e-06
STOM	1.70059e-05
MAPKAP1	2.10136e-11
FAM129B	1
PTRH1	1
DPM2	0.955701
LCN2	8.92096e-06
SPTAN1	2.32706e-05
ZDHHC12	1
NTMT1	1
TOR1A	1
FNBP1	1
ASS1	4.56729e-06
SURF2	1
PAEP	0.955701
TMEM141	1
RABL6	1
TRAF2	1.29159e-09
FBXW5	1
CLIC3	1
TMEM203	1
IFITM2	0.00713512
IFITM1	0.0103952
PNPLA2	1
TOLLIP	0.778749
CD81	0.459839
TSSC4	0.360838
PHLDA2	1
PGAP2	1
WEE1	0.131617
ADM	1
SAA1	8.92096e-06
LDHA	2.17723e-12
IMMP1L	1
HIPK3	1
TTC17	1
HSD17B12	1
CD82	1
CKAP5	0.735642
PTPMT1	1
FAM111B	1
FAM111A	1
B3GAT3	0.000303059
TTC9C	1
TMEM223	1
ATL3	1
MARK2	0.00481088
MACROD1	1
TRPT1	1
NUDT22	1
ZFPL1	1
DPF2	0.0610311
SIPA1	1
RNASEH2C	0.33088
SART1	0.360838
CST6	0.740673
RCE1	1
RHOD	0.00206949
RPS6KB2	2.66188e-21
CDK2AP2	0.955701
CCND1	4.67706e-19
STARD10	1
POLD3	0.477584
RAB30-AS1	1
PCF11	0.778749
CCDC90B	1
CREBZF	0.000232919
PRSS23	0.955448
SMCO4	1
CCDC82	1
BIRC3	0.103353
DCUN1D5	1
CASP4	1
CARD16	1
AASDHPPT	1
ACAT1	0.000232919
FDX1	1
C11orf1	1
REXO2	1
MPZL2	1
CD3D	3.16569e-05
TRAPPC4	0.000178059
HYOU1	1
H2AFX	3.89015e-12
DCPS	0.955701
APLP2	0.910908
ST14	1
ZBTB44	1
LARP4B	0.651636
KLF6	2.10136e-11
CALML5	0.955701
USP6NL	0.0103952
CAMK1D	1
SUV39H2	1
VIM	2.17723e-12
NSUN6	1
NRP1	3.89015e-12
SGMS1	0.00713512
CDK1	3.74281e-20
DNAJC12	1
HERC4	1
SRGN	0.583311
TSPAN15	1
P4HA1	6.88735e-12
ECD	0.360838
PLAU	2.28079e-06
SNCG	1
ATAD1	0.360838
IFIT3	0.0176957
IFIT1	0.0103952
KIF20B	0.0610311
RPP30	0.0124653
PCGF5	0.495718
TNKS2	1
BLOC1S2	1
FBXL15	1
ACTR1A	1
BORCS7	1
PDCD4	1
SHOC2	4.28164e-05
OAT	0.00481088
BNIP3	0.0610311
CCDC77	1
NINJ2	1
RAD51AP1	0.00257345
TAPBPL	0.0148835
SPSB2	1
C1S	0.196391
C1R	0.196391
NECAP1	1
CLEC2B	1
GABARAPL1	0.131617
ETV6	1
GPRC5A	1
EMP1	1
ATF7IP	1
PLBD1	1
ARHGDIB	2.36469e-18
RERG	1
RECQL	1
GOLT1B	1
ETNK1	1
TM7SF3	1
KIAA1551	1
TWF1	1
TMEM106C	1
DDX23	0.360838
TUBA1A	0.003185
MCRS1	0.0247032
AQP5	1
SMAGP	1
KRT7	0.824891
PCBP2	0.910908
ATF7	2.10136e-11
MUCL1	0.0610311
SARNP	1
PYM1	1
CDK2	6.88735e-12
RAB5B	0.778749
RPL41	0.165299
STAT2	0.00104546
PRIM1	0.131617
NDUFA4L2	0.275699
R3HDM2	1
DDIT3	3.62211e-11
LRIG3	1
SRGAP1	1
TBK1	0.0176957
DYRK2	1
CPM	1
LYZ	1
YEATS4	0.0800071
PHLDA1	0.693229
C12orf29	1
TMTC3	1
DUSP6	1.59646e-06
ATP2B1	1
EEA1	0.00104546
ELK3	1
SCYL2	1
C12orf75	0.911663
CKAP4	1
CORO1C	1
UBE3B	1
ANKRD13A	1
C12orf76	1
ALDH2	1
MED13L	0.184308
WSB2	1
TAOK3	0.735642
RAB35	0.0910988
PXN	1.48514e-14
RNF10	1
SPPL3	1
C12orf43	1
P2RX4	1
RNF34	1
RHOF	1
BCL7A	0.0610311
CLIP1	0.133791
SNRNP35	1
EIF2B1	1
PUS1	1
PXMP2	0.360838
PSPC1	1
MTIF3	0.610982
ALOX5AP	1
HSPH1	0.103353
RFC3	0.204821
MRPS31	0.610982
WBP4	0.360838
DNAJC15	1
NUDT15	1
RB1	4.26822e-22
CKAP2	0.00257345
KLF5	3.85996e-15
RBM26	1
TEX30	1
LAMP1	0.425361
TMCO3	1
RNASE1	1
LRP10	0.000392245
PABPN1	1
DCAF11	0.0148835
GZMB	0.621038
SCFD1	0.226874
STRN3	0.00104546
EGLN3	0.00131912
SPTSSA	0.955701
EAPP	0.955448
NFKBIA	2.36469e-18
MBIP	0.866518
SFTA3	1
FOXA1	2.02387e-08
MIS18BP1	0.00863124
ATP5S	1
ERO1A	0.910908
GNPNAT1	1
MAPK1IP1L	1
JKAMP	1
PPM1A	1.20841e-11
SIX1	1
PPP2R5E	6.6319e-13
ATP6V1D	0.355649
ZFP36L1	2.10136e-11
PSEN1	2.93449e-10
NPC2	0.868017
ISCA2	1
EIF2B2	1
IFT43	1
IRF2BPL	1
CCDC88C	1.092e-07
PPP4R3A	1
LGMN	0.735642
IFI27L1	1
IFI27L2	1
GSKIP	1
VRK1	0.955701
CCNK	2.86818e-14
WARS	1
TNFAIP2	1
ZFYVE21	1
AKT1	1.67351e-22
CRIP1	0.910908
IGHG4	1
IGHA1	1
IGHG1	1
IGHG3	1
IGHM	1
NIPA2	0.103353
CYFIP1	2.10136e-11
ZNF770	1
KNSTRN	0.459839
GCHFR	1
RHOV	1
CHP1	1
NUSAP1	0.000303059
CCNDBP1	1
MFAP1	0.360838
CTDSPL2	1
C15orf48	0.910908
BLOC1S6	1
SPPL2A	1
WDR72	1
RAB27A	1
CCNB2	3.23773e-06
TPM1	0.302495
FAM96A	1
SNX1	1.76152e-10
MAP2K1	2.66188e-21
SNAPC5	1
C15orf61	1
LARP6	1
ADPGK	1.70059e-05
FBXO22	0.000646927
CTSH	0.866518
TMED3	1
ST20	1
C15orf40	1
BTBD1	1
NMB	1
ISG20	0.00713512
MESP1	1
PRC1	0.000303059
MEF2A	3.85996e-15
PIGQ	0.955701
MSRB1	1
GFER	0.00863124
SNHG19	1
TRAF7	1
PDPK1	1.03771e-13
FLYWCH2	1
HCFC1R1	0.866518
NAA60	1
C16orf72	1
EMP2	1
NUBP1	1
SOCS1	0.003185
ARL6IP1	0.955448
TMEM159	1
NUPR1	0.610982
PHKG2	0.955701
HSD3B7	1
BCKDK	1
PRSS8	1
DNAJA2	0.103353
ITFG1	1
MT2A	0.824891
MT1F	1
MT1X	0.824891
HERPUD1	0.955448
ARL2BP	1
USB1	1
CFAP20	1
CNOT1	0.0910988
GOT2	3.33306e-09
CKLF	1
NUTF2	4.84832e-10
NFATC3	1.0486e-10
SLC7A6OS	1
CDH3	5.29209e-09
CDH1	7.61109e-15
CHTF8	0.583311
NQO1	0.000232919
AP1G1	1
CMC2	1
CENPN	0.00206949
COTL1	1
USP10	1
EMC8	1
MAP1LC3B	0.00392348
CYBA	1.20841e-11
SPG7	1
MYO1C	0.0610311
RPA1	0.0103952
EMC6	1
ARRB2	7.67112e-07
CXCL16	0.360838
PFN1	0.003185
RABEP1	0.693229
TMEM256	0.955448
CD68	0.215082
MPDU1	0.955701
RANGRF	0.000392245
STX8	1
PEMT	1
SREBF1	0.250494
SPECC1	1
MAP2K3	0.392344
WSB1	0.532924
TMEM97	1
KIAA0100	1
SUPT6H	0.0247032
NSRP1	1
CPD	1
RHOT1	0.425361
SLFN5	1
CCL5	5.48306e-14
CCL18	1
CCL4	2.28079e-06
ACACA	0.33088
PPP1R1B	0.000646927
ERBB2	6.1894e-11
TOP2A	1.93693e-15
IGFBP4	1
KRT17	0.955701
IFI35	0.00713512
TMEM101	1
SLC25A39	1
NSF	1
CDC27	3.62211e-11
HOXB7	1
UBE2Z	0.621038
ITGA3	2.10136e-11
COL1A1	2.93449e-10
ANKRD40	1
TOB1	4.28164e-05
COX11	1
TRIM37	1
YPEL2	1
PTRH2	1
MED13	0.184308
METTL2A	0.955448
ERN1	2.02387e-08
SNHG25	1
KPNA2	6.6319e-13
SLC9A3R1	8.33844e-09
NAT9	1
MIF4GD	1
ITGB4	1.48514e-14
TRIM47	1
ACOX1	6.1894e-11
TMC6	1
SYNGR2	1
TK1	0.00481088
BIRC5	4.84832e-10
SOCS3	1.30394e-08
TIMP2	0.955448
CANT1	1
SLC38A10	1
ARL16	1
FASN	0.955448
CCDC57	1
SLC16A3	1
CD7	1
OGFOD3	1
TGIF1	1.20841e-11
RAB31	1
CHMP1B	1
TUBB6	0.003185
IMPACT	1
DSC2	1
GALNT1	0.0610311
SMAD2	1.07334e-21
PMAIP1	0.103353
SERPINB4	1
TRIB3	3.62211e-11
CDS2	1
GPCPD1	1
OVOL2	1
RIN2	0.425361
PYGB	0.955448
ID1	0.00206949
BCL2L1	7.94525e-10
TPX2	0.000303059
TM9SF4	1
MAP1LC3A	0.868017
EDEM2	1
NFS1	1
MYL9	1.11027e-06
SAMHD1	0.0103952
RALGAPB	1
MAFB	2.10136e-11
PKIG	1
STK4	0.0176957
SLPI	0.621038
SDC4	5.29209e-09
WFDC2	0.532924
WFDC3	1
UBE2C	3.16569e-05
TNNC2	1
TMEM189	1
CEBPB	2.46397e-23
PARD6B	0.00257345
ADNP	1
AURKA	7.94525e-10
TFAP2C	3.16569e-05
PMEPA1	6.88735e-12
STX16	1
PRELID3B	1
PHACTR3	1
SYCP2	1
RGS19	0.0800071
MISP	1
CFD	1
WDR18	0.33088
ABCA7	0.250494
GPX4	0.165299
MIDN	1
MKNK2	0.910908
AP3D1	1
ZBTB7A	1
SH3GL1	1
PTPRS	3.33306e-09
GPR108	1
INSR	1.94458e-13
RPS28	0.00257345
ANGPTL4	0.184308
ICAM1	0.0290083
ICAM3	0.824891
LDLR	0.226874
ACP5	1
ADGRE5	1
NOTCH3	0.000232919
RAB8A	0.955701
USE1	1
JUND	2.10136e-11
GDF15	0.00392348
BORCS8	1
NR2C2AP	1
PDCD2L	1
FXYD3	1
LSR	1
U2AF1L4	1
HCST	1
TYROBP	0.003185
C19orf33	0.610982
FAM98C	1
ZFP36	5.26523e-07
SERTAD1	0.250494
SERTAD3	1
CEACAM6	8.92096e-06
DEDD2	1
CEACAM1	2.17723e-12
ZNF576	1
PVR	1
BCL3	0.000646927
CBLC	1
BCAM	1
APOE	1.11027e-06
APOC1	0.33088
GEMIN7	0.392344
VASP	3.62211e-11
EMP3	1
BCAT2	1
PLEKHA4	1
TEAD2	0.00104546
RCN3	1
RRAS	0.0124653
NAPSA	0.0708385
JOSD2	1
NKG7	0.583311
TFPT	0.911663
EPS8L1	1
ZNF544	1
RPS4Y1	1
BCL2L13	0.610982
PEX26	0.360838
DGCR2	1
SLC25A1	1
MRPL40	0.0800071
DGCR6L	1
MED15	1.20841e-11
SNAP29	1
CRKL	1.23541e-05
THAP7	1
YDJC	1
SDF2L1	1
IGLC2	1
IGLC3	0.955701
HSCB	1
ZMAT5	1
TBC1D10A	0.00131912
PIK3IP1	0.910908
YWHAH	1.76152e-10
TIMP3	1
HMOX1	2.10136e-11
MB	1
APOL3	1
APOL4	1
APOL2	1
APOL1	0.250494
IFT27	1
LGALS1	0.735642
CSNK1E	3.33306e-09
CBY1	2.083e-09
CBX6	0.495718
APOBEC3C	1
DESI1	1
CENPM	0.00257345
ARFGAP3	1
BIK	0.103353
PRR34-AS1	1
TBC1D22A	1
CRELD2	1
SCO2	0.955701
MRPS6	0.0910988
SLC5A3	0.955448
CBR1	1
ETS2	1.0486e-10
BRWD1	1
BACE2	1
TFF3	4.84832e-10
PDXK	1
CSTB	0.546788
FAM207A	1
MT-ATP6	0.355649
MT-ND3	0.355649
