# Supplementary material for: SIDISH Identifies High-Risk Disease-Associated Cells and Biomarkers by Integrating Single-Cell Depth and Bulk Breadth
Source: Research Square preprint supplement (doi:10.21203/rs.3.rs-5921999/v1), 2025-03-10
Supplement: Supplementary file 6 [file c59e1b36c58448d6a1d4c88a.xlsx]

## Sheet: Description
Descriptions
1. Perturbation Scores: Perturbation score for each gene in PDAC scRNA-seq dataset, representing the impact ofknockinh out a specific genes, on the transition of High-Risk cells to Background cells.
2. Marker Genes P value: provides the p-values from the chi-square test for each gene, assessing the statistical significance of these transitions. Significant P values (P < 0.05) indicate genes with a meaningful effect on the transition of High-Risk cells, highlighting their potential relevance as therapeutic targets.

## Sheet: 1. Perturbation Scores
Gene	Perturbation Score
ISG15	20.6459
TNFRSF18	-9.85371
TNFRSF4	-22.7712
MXRA8	-1.13166
VWA1	2.76014
MMP23B	-1.29727
GABRD	-1.32487
ACOT7	-1.18686
TNFRSF25	-9.5501
TNFRSF9	-22.1087
ERRFI1	-1.18686
RBP7	-1.21446
FBXO2	-1.24206
TNFRSF1B	9.5777
PDPN	3.64339
HSPB7	0.57963
MFAP2	20.2871
PADI2	-1.18686
PADI1	-1.29727
AKR7A3	-1.32487
RNF186	-1.35247
PLA2G2A	-8.14242
PLA2G5	-3.8366
CDA	27.4358
ALPL	28.7607
HSPG2	4.71985
C1QA	18.9622
C1QC	1.73889
C1QB	0.745239
ID3	22.7436
CNR2	2.26332
RUNX3	21.4187
STMN1	17.0025
FAM110D	-1.26967
CD52	4.22302
ZNF683	-1.40767
SFN	12.8347
TRNP1	-1.8493
FCN3	-5.07866
FGR	37.538
IFI6	17.1957
THEMIS2	-1.35247
SNHG12	-1.35247
LAPTM5	4.47143
FABP3	5.54789
COL16A1	7.36958
FAM167B	-1.35247
LCK	25.5037
GJA4	-12.5863
CLSPN	23.0196
COL8A2	14.2423
CSF3R	-10.9302
CDCA8	22.9644
HEYL	16.3953
CITED4	-8.80486
EDN2	27.6566
SLC2A1	34.3362
TIE1	-2.64974
CDC20	29.6163
C1orf228	-1.29727
PTCH2	-1.18686
PIK3R3	12.6967
TSPAN1	-2.92575
PDZK1IP1	-1.43527
PODN	-1.38007
TACSTD2	22.578
FGGY	-1.21446
LEPR	-1.04885
PDE4B	32.0453
SGIP1	4.38863
GADD45A	25.8625
DIRAS3	-1.43527
PTGER3	-0.910847
NEGR1	-1.35247
NEXN	-1.40767
DNAJB4	21.1151
IFI44L	13.7179
CYR61	28.5399
GBP1	8.61165
GBP4	-1.21446
GBP5	6.48634
TGFBR3	18.0513
GFI1	3.20177
ARHGAP29	-1.24206
F3	-5.18907
PALMD	-1.13166
VCAM1	-1.49048
S1PR1	-0.855644
COL11A1	-3.69859
AMY2B	-0.77284
KIAA1324	-1.26967
KCNA3	-8.88766
CD53	25.3381
DENND2D	-1.54568
CHI3L2	-1.54568
C1orf162	-10.0193
PTPN22	-19.0726
OLFML3	-0.993652
NGF	0.0552029
CASQ2	7.6456
CD2	14.6288
FAM46C	-1.43527
PHGDH	8.58405
HMGCS2	2.73254
REG4	-3.67099
FCGR1B	3.11896
ITGA10	12.6691
GJA5	17.0025
FCGR1A	-0.96605
HIST2H2AA3	29.8096
HIST2H2BE	25.2553
ECM1	5.32708
CTSS	18.355
CTSK	30.6652
C1orf56	-1.35247
MLLT11	0.96605
SPRR1B	16.0916
S100A9	8.80486
S100A12	7.89401
S100A8	3.20177
S100A7	-4.47143
S100A2	0.0828043
S100A14	-1.49048
S100A1	20.0938
SHE	-1.35247
KCNN3	1.15926
EFNA1	3.67099
MUC1	11.703
NES	17.0853
CRABP2	1.21446
SH2D2A	9.85371
FCRL5	-2.15291
FCRL3	4.11261
FCRL2	-2.15291
FCRL1	-2.62214
CD1D	8.55644
CD1C	-9.05327
CD1E	-8.30803
MNDA	-7.34198
PYHIN1	-1.32487
AIM2	-5.63069
CADM3	6.84516
FCER1A	-8.97047
CRP	-13.2487
SLAMF8	-15.7604
SLAMF9	-4.74745
LINC01133	-1.9321
ATP1A2	-5.35468
SLAMF6	4.80265
CD84	5.7963
SLAMF1	19.8454
CD48	22.0811
SLAMF7	9.5225
LY9	9.5225
ITLN1	10.4333
ARHGAP30	-1.15926
ADAMTS4	15.236
FCER1G	14.1871
MPZ	7.06597
FCGR2A	-4.47143
HSPA6	14.822
FCGR3A	6.04471
FCGR2B	-17.3061
FCRLA	-1.9045
OLFML2B	-1.35247
DDR2	9.5777
RGS4	10.0469
RGS5	10.0469
NUF2	22.7712
GPA33	10.9026
CD247	6.26553
RCSD1	-1.46288
XCL2	2.81535
XCL1	24.6757
DPT	14.3527
ATP1B1	-5.35468
SLC19A2	-1.38007
SELP	-15.8432
SELL	-9.96412
SELE	-18.355
PRRX1	12.1446
FMO3	-0.138007
FMO2	-0.138007
FMO1	-0.138007
TNFSF4	-14.684
ANGPTL1	10.4885
IER5	-1.38007
RGS16	10.0469
NPL	-1.51808
LAMC2	28.2363
NCF2	15.236
FAM129A	-1.35247
PRG4	2.15291
PTGS2	8.61165
RGS18	6.95556
RGS1	10.8198
RGS13	10.0469
RGS2	13.9663
CFH	0.607232
CFHR1	2.84295
ASPM	23.13
PTPRC	17.1957
LMOD1	19.7074
ELF3	-2.40132
PTPN7	-1.35247
PPP1R12B	21.8603
CHI3L1	19.321
CHIT1	11.6754
BTG2	20.1766
FMOD	8.36323
PRELP	6.87276
LAX1	9.24648
KISS1	2.31852
NFASC	-1.60088
NUAK2	-1.35247
CTSE	13.0279
RASSF5	10.3229
IL10	13.1935
PIGR	-2.62214
C4BPA	-1.24206
CD55	1.54568
CR2	4.66464
CR1	0.331217
CD34	4.99586
MIR205HG	-1.07646
LAMB3	14.9324
G0S2	2.84295
HSD11B1	-0.165609
TRAF3IP3	-1.29727
ATF3	6.07232
PROX1	8.69445
CENPF	22.2192
FAM177B	-1.26967
CAPN8	-1.43527
LEFTY1	9.27408
AGT	11.6478
SIPA1L2	-1.29727
NID1	7.6732
NLRP3	-19.5142
SH3YL1	-7.39718
PXDN	-1.21446
COLEC11	-13.3039
SOX11	6.15512
RSAD2	12.1998
ID2	8.94287
RRM2	21.1979
VSNL1	-1.38007
OSR1	-1.35247
LINC00954	-1.38007
MATN3	30.196
SDC1	-18.1341
ADCY3	24.4273
CENPA	28.3743
EMILIN1	5.7411
TRIM54	2.37372
LBH	-1.43527
LTBP1	9.88131
RASGRP3	14.3527
AC073218.2	-1.40767
QPCT	-1.24206
CYP1B1	8.55644
TMEM178A	-1.35247
SLC8A1	-6.45874
SLC3A1	4.69224
EPAS1	10.0193
BCYRN1	-1.40767
EPCAM	11.2338
EFEMP1	12.3378
BCL11A	16.8369
PLEK	16.5333
ARHGAP25	-1.46288
ANTXR1	5.90671
ANXA4	5.7135
MXD1	-1.62848
DYSF	-1.24206
ACTG2	19.4866
MTHFD2	9.27408
HK2	10.8474
REG1A	2.48413
REG3A	1.32487
SH2D6	-1.35247
GNLY	1.9321
ATOH8	-1.26967
CD8A	20.149
CD8B	-4.88545
FABP1	27.3806
MAL	6.70715
LINC00342	-1.46288
ANKRD36C	-1.46288
GPAT2	-0.552029
ADRA2B	-1.35247
DUSP2	-0.855644
ZAP70	-10.599
AFF3	-1.29727
IL1R2	-21.8879
IL1RL1	1.18686
IL18R1	-19.7902
C2orf40	-1.40767
SULT1C2	-1.29727
MALL	-1.13166
AC017002.1	-1.35247
FBLN7	-1.38007
CKAP2L	19.183
IL1B	-14.5736
IL1RN	-10.2953
MARCO	-11.9514
TMEM37	-1.65609
SCTR	2.12531
INHBB	9.5225
LIMS2	-1.24206
LYPD1	-1.40767
CXCR4	-8.25283
KYNU	6.32073
RND3	-1.60088
TNFAIP6	2.48413
NR4A2	18.6034
CYTIP	8.61165
CD302	-1.32487
GCG	32.5421
FAP	10.5713
SLC38A11	-1.38007
SCN3A	-1.60088
SCN7A	-1.60088
NOSTRIN	-7.81121
SPC25	23.682
G6PC2	-0.717637
KLHL23	-1.15926
ITGA6	35.1642
RAPGEF4	10.8198
CDCA7	15.236
GPR155	-1.32487
CHN1	6.01711
ITGA4	11.841
NEUROD1	17.9409
FRZB	10.4057
CALCRL	2.45653
TFPI	4.58184
COL3A1	13.3039
COL5A2	6.54154
SLC40A1	-1.04885
STAT4	-1.10406
HECW2	-1.29727
ANKRD44	-1.26967
CD28	-2.34612
CTLA4	3.47778
ICOS	-10.599
NRP2	4.25062
CPS1	-0.0828043
FN1	-17.6925
IGFBP2	26.9942
IGFBP5	11.8134
GPBAR1	10.6818
SLC11A1	0.662434
CYP27A1	-12.6967
WNT6	9.88131
PTPRN	0.717637
DES	9.6329
EPHA4	4.94066
KCNE4	3.25697
SCG2	2.76014
SERPINE2	4.60944
TM4SF20	-1.46288
CCL20	-12.3102
SP140	-1.38007
ITM2C	-1.54568
ECEL1	-1.38007
EFHD1	-1.35247
INPP5D	-3.39498
ACKR3	9.30168
COL6A3	11.9238
RAMP1	2.45653
HES6	2.07011
PASK	-1.24206
PDCD1	-4.41623
LMCD1	-1.51808
SSUH2	-1.35247
SRGAP3	11.3166
GHRL	28.6779
TIMP4	3.22937
FBLN2	6.23792
SLC6A6	-1.46288
ANKRD28	-1.26967
OXNAD1	-1.29727
RFTN1	-1.32487
ZNF385D	-1.38007
EOMES	26.4146
CMC1	-1.29727
RBMS3	-1.35247
TGFBR2	1.76649
SUSD5	-1.35247
CX3CR1	-2.59453
CCK	13.2211
SNRK	-0.855644
CLEC3B	-1.24206
TMEM158	-1.07646
CXCR6	24.9517
CCR1	-4.41623
CCR2	-5.98951
CCR5	25.0069
LTF	-11.7582
PTH1R	30.886
HYAL2	20.7563
CISH	-6.54154
SEMA3G	6.98316
TNNC1	7.14877
STAB1	-3.64339
MUSTN1	-1.32487
WNT5A	12.1998
DNASE1L3	-1.32487
FAM107A	-1.26967
FAM3D	-1.35247
PTPRG	-1.21446
ADAMTS9	29.6715
EPHA3	7.7008
COL8A1	11.289
FILIP1L	-1.21446
TMEM45A	-1.49048
ABI3BP	-1.35247
TRAT1	-1.26967
CD96	8.91526
ZBED2	-1.35247
GCSAM	-1.40767
CD200	6.12752
BTLA	-11.979
CCDC80	-0.993652
BOC	-1.18686
SIDT1	-1.35247
SIDT1-AS1	-1.29727
TIGIT	2.73254
LSAMP	-1.38007
UPK1B	-1.24206
PLA1A	-2.40132
FSTL1	4.88545
EAF2	-1.38007
CD86	16.6989
CSTA	8.36323
PARP15	-1.35247
MYLK	22.8264
MUC13	21.1427
HEG1	-1.24206
GATA2	5.90671
HMCES	-1.38007
BFSP2	-2.53933
SLCO2A1	4.80265
CLDN18	-1.51808
RBP1	-1.82169
CLSTN2	9.24648
PCOLCE2	12.3654
CHST2	18.7966
AGTR1	8.47364
CPB1	13.9387
CP	20.9219
TM4SF18	-1.13166
TM4SF1	12.4206
TM4SF4	1.18686
GPR171	-1.8769
P2RY14	-1.18686
P2RY13	-1.18686
SUCNR1	-1.21446
MME	20.9771
KCNAB1	3.47778
PTX3	-1.21446
LXN	14.5184
RARRES1	-1.62848
ARL14	-1.43527
SPTSSB	-1.13166
SERPINI1	10.7646
MECOM	-1.26967
CLDN11	6.90036
LAMP3	5.57549
KLHL6	-0.0552029
LIPH	-2.40132
ST6GAL1	22.0535
SST	30.1408
HES1	18.1893
FAM43A	-1.26967
APOD	-3.09136
MUC20	21.1427
MUC4	10.7646
TFRC	-7.89401
CPLX1	0.19321
SPON2	27.4082
LYAR	-0.993652
NSG1	-1.35247
CYTL1	-1.9873
JAKMIP1	-1.32487
S100P	7.31438
HTRA3	-1.26967
CLNK	-1.35247
HS3ST1	2.31852
CD38	16.8921
FGFBP1	3.31217
FGFBP2	6.09992
PROM1	3.56059
LDB2	11.7306
SLIT2	14.2147
SOD3	-3.39498
SLC34A2	16.1192
TLR10	-9.27408
TMEM156	-1.46288
SMIM14	-1.51808
RHOH	13.2487
UCHL1	28.1259
LIMCH1	-1.40767
GABRA2	-1.46288
CNGA1	-1.32487
TXK	4.91306
RASL11B	-1.35247
PDGFRA	3.67099
KIT	21.4187
KDR	9.19128
NMU	6.62434
HOPX	-1.60088
SPINK2	-6.62434
STAP1	25.3933
UGT2B15	0.165609
UGT2A3	5.29948
UGT2B7	-2.09771
SULT1E1	0.96605
ODAM	-1.29727
FDCSP	-1.29727
DCK	39.6633
SLC4A4	33.7566
GC	23.3508
RASSF6	-1.29727
CXCL6	-16.4229
CXCL1	-18.0513
CXCL5	-14.2423
CXCL3	-21.3635
CXCL2	-16.0364
EREG	11.5374
AREG	21.5015
PARM1	-1.24206
CXCL9	1.38007
CXCL10	-16.3953
CXCL11	18.6034
SHROOM3	-1.57328
CXCL13	15.9812
LINC01094	-1.35247
SCD5	4.80265
PLAC8	-4.60944
ARHGAP24	-1.71129
SPP1	32.9285
PPM1K	-1.40767
HERC5	7.59039
SNCA	11.6202
MMRN1	-1.35247
HPGDS	3.22937
ADH6	5.43748
ADH1B	5.43748
DAPP1	6.12752
DDIT4L	-0.552029
EMCN	-1.32487
BANK1	-2.73254
CENPE	22.7436
LEF1	27.7118
ENPEP	33.3701
ANK2	-1.13166
SYNPO2	0.57963
FABP2	2.84295
MAD2L1	26.4974
TNIP3	4.91306
CCNA2	36.6823
SPRY1	-0.883246
SLC7A11	-1.04885
EDNRA	25.1725
TMEM154	-1.35247
TLR2	8.94287
SFRP2	9.41209
TDO2	6.32073
FAM198B	-1.26967
NPY1R	-0.496826
MARCH1	14.4908
CPE	-1.76649
TLL1	1.51808
ANXA10	-1.02125
PALLD	-0.441623
HMGB2	19.7626
SCRG1	-1.26967
HAND2	24.2617
HAND2-AS1	-1.32487
HPGD	-2.92575
VEGFC	22.854
ACSL1	6.23792
ANKRD37	-1.32487
PDLIM3	0.38642
SORBS2	-0.441623
IRX2	-1.35247
C5orf38	-1.32487
SEMA5A	13.9111
FAM105A	-1.24206
BASP1	-1.38007
CDH6	-1.26967
NPR3	-1.26967
C1QTNF3	-1.71129
RAI14	-1.32487
IL7R	-7.7008
SLC1A3	17.0025
LIFR	-0.938449
PTGER4	2.40132
C7	20.4251
C6	24.0132
HMGCS1	10.3781
CCL28	8.55644
EMB	-1.38007
ITGA1	4.38863
ITGA2	6.87276
FST	-2.34612
ARL15	-1.38007
ESM1	8.99807
GZMK	2.40132
GZMA	11.4546
PLK2	33.0113
GAPT	-1.32487
RAB3C	-1.29727
ADAMTS6	13.7731
CD180	-7.618
CCNB1	27.9051
MAP1B	-1.35247
ENC1	-1.24206
F2RL2	-0.110406
F2R	-7.09357
THBS4	15.512
VCAN	8.08722
EDIL3	-1.13166
MEF2C	9.38449
LUCAT1	-1.35247
NR2F1	13.3591
MCTP1	-1.35247
PCSK1	15.512
TSLP	-3.61579
CAMK4	-2.40132
NREP	-0.910847
CDO1	12.3102
PRR16	-1.40767
LOX	7.09357
LMNB1	9.88131
SLC12A2	36.2959
TCF7	16.9197
CXCL14	12.1722
TGFBI	3.03616
SPOCK1	14.2147
MZB1	-3.47778
ECSCR	-1.38007
HBEGF	2.18051
CD14	31.5208
PCDH12	-1.35247
DPYSL3	-1.26967
C5orf46	-1.51808
SPINK5	12.1998
ADRB2	9.5501
MIR145	-1.32487
SLC26A2	35.7439
CSF1R	21.3359
PDGFRB	13.6075
GPX3	6.04471
CCDC69	-1.35247
GM2A	-1.40767
SPARC	50.621
HAVCR2	5.57549
ITK	-8.69445
CYFIP2	-6.48634
ADAM19	-1.35247
EBF1	-4.85785
C1QTNF2	-1.49048
PTTG1	22.5504
ATP10B	-1.35247
HMMR	22.992
SLIT3	11.565
DOCK2	18.8518
LCP2	19.0174
KCNMB1	3.7538
GABRP	-1.57328
NEURL1B	17.4165
STC2	-5.8515
CPEB4	12.6139
HRH2	-1.32487
ADAMTS2	10.1297
LTC4S	-4.85785
SCGB3A1	-1.40767
BTNL9	-1.43527
IRF4	11.979
SERPINB9	9.90892
TUBB2A	21.1151
TUBB2B	22.1916
NRN1	-1.51808
F13A1	10.5713
LY86	3.72619
NEDD9	12.6691
EDN1	21.9983
PHACTR1	-1.32487
GFOD1	-1.26967
CD83	-20.2043
ID4	-0.938449
SOX4	6.51394
DCDC2	-1.15926
GMNN	22.4676
SCGN	-1.40767
SLC17A4	-1.18686
HIST1H1C	27.3254
HIST1H4C	31.438
HIST1H1E	18.8518
HIST1H2BD	12.3378
HIST1H1D	14.1319
HIST1H2BJ	12.0894
HIST1H2AK	15.2084
HIST1H1B	30.6928
UBD	9.90892
HLA-G	6.32073
RNF39	-1.32487
TRIM31	1.71129
SFTA2	-1.24206
DPCR1	-1.13166
C6orf15	-1.38007
LTA	-6.59674
TNF	16.064
LTB	7.59039
LST1	12.1446
NCR3	3.28457
AIF1	-5.60309
HSPA1A	-0.828043
HSPA1B	3.809
C2	-6.59674
CFB	2.26332
TNXB	2.51173
GPSM3	-1.32487
NOTCH4	27.1046
HLA-DRA	24.8413
HLA-DRB5	16.8921
HLA-DQA1	12.0618
HLA-DQB1	16.8921
HLA-DQA2	12.0618
HLA-DQB2	16.8921
HLA-DOB	1.46288
HLA-DMB	1.46288
HLA-DOA	12.5035
HLA-DPA1	17.6925
HLA-DPB1	16.8921
HMGA1	17.0577
DEF6	-1.32487
C6orf222	-1.38007
CPNE5	-1.35247
PI16	0.248413
FGD2	-1.26967
KCNK17	-1.35247
MOCS1	16.9197
APOBEC2	-1.35247
TREM2	-1.54568
TREM1	-21.4739
PGC	-0.441623
PTK7	8.74965
RUNX2	40.6017
RCAN2	-1.32487
PLA2G7	16.9749
GSTA2	5.49269
GSTA1	3.809
COL9A1	12.9451
OGFRL1	-1.26967
COL12A1	11.703
FILIP1	-1.32487
FAM46A	-1.43527
CNR1	-11.427
RNGTT	5.40988
BACH2	21.0047
FHL5	-1.9597
PRDM1	6.78995
QRSL1	-1.38007
SCML4	-1.40767
SESN1	-1.49048
SLC16A10	-2.81535
COL10A1	31.1896
FAM162B	-1.35247
PLN	8.28043
GJA1	8.83246
PKIB	-1.32487
HEY2	27.9327
NCOA7	-1.43527
CENPW	28.6227
RSPO3	19.6246
THEMIS	2.95335
LAMA2	29.4507
SAMD3	-1.21446
AKAP7	-0.469224
ENPP1	29.4783
CTGF	17.3889
MOXD1	-1.38007
VNN1	-1.60088
VNN2	8.22523
TCF21	-1.38007
SGK1	23.958
TNFAIP3	9.96412
CITED2	17.3337
SASH1	-1.26967
AKAP12	39.7737
MYCT1	-1.35247
IPCEF1	-1.38007
SYTL3	-1.32487
TAGAP	11.3994
FNDC1	-1.21446
SOD2	-12.9175
CCR6	-1.26967
SMOC2	-1.35247
THBS2	31.9625
DLL1	22.2192
PDGFA	16.6161
GPR146	-1.32487
ZFAND2A	-1.40767
FSCN1	-5.57549
THSD7A	13.7731
SOSTDC1	-1.38007
AGR2	0.276014
AGR3	-0.524427
TWIST1	27.9879
MACC1	-1.24206
ITGB8	12.7795
IL6	16.5609
GPNMB	11.3166
SNX10	-1.21446
HOTAIRM1	-1.21446
CREB5	-1.18686
CPVL	-1.49048
INMT	7.39718
AQP1	1.68369
ANLN	22.8264
AOAH	-1.71129
ELMO1	21.6119
SFRP4	6.12752
SUGCT	-1.32487
INHBA	10.7646
AEBP1	-0.828043
MYO1G	11.7582
SNHG15	-1.24206
RAMP3	2.37372
IGFBP1	29.9476
IGFBP3	-13.2211
IKZF1	9.71571
GRB10	31.1344
CLDN3	15.65
CLDN4	5.43748
ELN	11.5374
LAT2	2.51173
NCF1	-5.90671
CCL26	-1.73889
UPK3B	-1.24206
FGL2	15.9536
CD36	22.9644
SEMA3C	6.98316
ABCB4	-0.276014
STEAP4	-1.38007
STEAP1	-1.49048
FZD1	6.21032
HEPACAM2	-1.38007
TFPI2	6.98316
GNG11	5.21667
COL1A2	7.83881
PEG10	5.65829
PDK4	-1.62848
DLX5	22.4676
NPTX2	-1.38007
TMEM130	-1.35247
CYP3A5	13.1935
AZGP1	33.6185
STAG3	-1.24206
PVRIG	-1.24206
PILRA	-13.8835
PCOLCE	4.08501
MUC17	21.1427
SERPINE1	-4.85785
CLDN15	-1.26967
ORAI2	11.8686
RASA4	-1.38007
LRRC17	-1.35247
CCDC71L	-1.38007
PIK3CG	2.95335
LRRN3	-1.35247
CAV1	4.63704
CFTR	16.2296
HILPDA	-1.18686
MEST	13.6351
PODXL	-3.50538
AKR1B10	5.65829
CALD1	20.5355
PTN	9.46729
ZC3HAV1	-1.32487
TBXAS1	3.20177
CLEC5A	-13.9663
PRSS1	-0.96605
PIP	20.7563
RARRES2	7.89401
GIMAP8	-3.97461
GIMAP7	1.9597
GIMAP4	-3.97461
GIMAP6	-3.97461
GIMAP1	0
GIMAP5	6.07232
TMEM176B	-1.54568
AOC1	-1.65609
NOS3	6.51394
INSIG1	4.52664
CSF2RA	17.5821
IL3RA	-6.12752
P2RY8	-0.220811
MXRA5	-1.21446
NLGN4X	-1.38007
TLR7	4.71985
EGFL6	-1.29727
GPM6B	-1.38007
ASB9	-2.23572
BMX	-1.65609
ACE2	32.7353
AP1S2	-1.9873
CXorf21	-1.43527
GK	3.17417
TMEM47	-1.35247
CYBB	0.993652
SRPX	-1.38007
RPGR	-1.35247
TSPAN7	-1.26967
GPR34	-0.993652
GPR82	-1.38007
CXorf36	-1.24206
CFP	12.2274
WAS	1.40767
PCSK1N	-0.634833
PIM2	13.3591
FOXP3	4.36103
VSIG4	3.56059
IL2RG	12.1998
CXCR3	3.39498
CYSLTR1	3.33977
P2RY10	-1.38007
ITM2A	-1.46288
BTK	-4.99586
TCEAL2	-1.35247
BEX5	-1.51808
TMSB15A	-1.35247
BEX1	13.9663
BEX2	5.05106
ZCCHC18	-1.35247
CLDN2	-0.855644
VSIG1	-1.18686
CHRDL1	-1.35247
SLC6A14	-1.46288
SOWAHD	-1.35247
SH2D1A	11.0682
SASH3	-0.358819
RAB33A	-1.29727
GPC3	0.800442
MIR503HG	-1.35247
FHL1	-1.35247
CD40LG	-5.02346
HMGB3	-1.21446
CSAG1	-1.32487
BGN	-11.3166
SLC6A8	-2.23572
SSR4	-1.51808
F8	0.110406
CLIC2	-1.29727
MYOM2	21.5567
ANGPT2	19.8454
DEFB1	-0.0828043
CLDN23	5.18907
SOX7	-1.38007
BLK	-7.23158
CTSB	13.6627
TUSC3	-1.51808
MSR1	5.18907
SLC7A2	-1.38007
PDGFRL	-1.51808
MTUS1	-1.79409
LPL	19.597
LZTS1	-1.26967
DOK2	0.496826
EGR3	4.60944
LOXL2	8.03202
STC1	-1.76649
ADAMDEC1	-1.29727
EBF2	-1.35247
CLU	18.5206
PNOC	-1.35247
DUSP4	-0.855644
NRG1	11.6478
FGFR1	6.67955
IDO1	-20.8115
SFRP1	-0.745239
PLAT	9.21888
SNAI2	37.2895
SOX17	23.1024
SDR16C5	7.23158
TOX	-1.43527
AC022182.3	-1.35247
MYBL1	-1.29727
PREX2	-1.35247
SULF1	13.1383
SBSPON	13.7731
PI15	-1.18686
STMN2	-1.46288
HEY1	23.9028
PAG1	13.1659
FABP5	6.26553
FABP4	14.4079
CA3	-1.35247
CA2	17.0853
RUNX1T1	-10.8198
CDH17	35.4402
GEM	-1.43527
SDC2	22.2192
MATN2	8.14242
OSR2	-1.38007
CTHRC1	-1.65609
ANGPT1	17.9133
PKHD1L1	-1.35247
SLC30A8	0.220811
TNFRSF11B	11.151
MAL2	-1.9597
NOV	14.2975
ENPP2	-1.38007
COL14A1	7.6732
HAS2	16.7541
FAM83A	-1.29727
FBXO32	22.578
ANXA13	-1.24206
SQLE	9.74331
TRIB1	5.7687
LINC00861	-1.43527
MYC	18.6862
SLA	0.19321
NDRG1	26.1386
GPR20	-1.32487
PTP4A3	12.393
PSCA	1.54568
LY6K	-0.910847
LYPD2	-1.43527
LYNX1	-0.910847
LY6D	-1.82169
LY6H	1.10406
GPIHBP1	13.9939
DOCK8	10.6818
IL33	-4.11261
PLIN2	2.84295
CDKN2A	37.0963
TEK	11.0406
SPINK4	-6.62434
AQP3	12.5035
PRSS3	23.8476
CCL19	-8.97047
CCL21	18.3826
CD72	-4.69224
SIT1	-1.54568
ARHGEF39	-1.32487
CA9	20.6735
TPM2	19.4866
GLIPR2	-1.07646
PAX5	6.81755
CNTNAP3B	-1.35247
PGM5-AS1	-1.35247
ALDH1A1	14.1595
FRMD3	-1.49048
NTRK2	11.6202
GAS1	-1.18686
CTSL	16.0916
C9orf47	-1.35247
S1PR3	-4.33343
CKS2	24.6481
GADD45G	14.9876
OGN	18.7138
OMD	18.7966
ASPN	13.0279
ECM2	10.1573
FGD3	-1.46288
SUSD3	-1.26967
FBP1	-0.607232
CTSV	14.5184
COL15A1	7.89401
NR4A3	-1.32487
ALDOB	-6.67955
TMEM38B	4.60944
KLF4	4.63704
CTNNAL1	3.7538
SVEP1	-1.38007
SLC31A2	0.745239
RGS3	11.6478
AMBP	11.1234
KIF12	-1.04885
AKNA	-1.26967
TNC	11.289
PAPPA	10.0193
CNTRL	14.3251
STOM	9.96412
PTGS1	9.96412
OLFML2A	-1.32487
ANGPTL2	0.745239
SH2D3C	-1.29727
ENG	-4.00221
LCN2	3.36738
CERCAM	-1.21446
PTGES	20.3147
ASS1	-10.2125
LAMC3	20.7839
AIF1L	-1.32487
CEL	12.0894
ADAMTSL2	14.2147
COL5A1	16.7265
FCN1	-8.97047
OLFM1	-1.29727
PAEP	20.8391
EGFL7	-1.18686
PTGDS	18.631
CLIC3	-1.40767
LRRC26	3.7538
NRARP	-1.35247
AKR1C1	-3.11896
AKR1C2	-0.303616
AKR1C3	7.09357
CALML5	-2.87055
IL2RA	-20.9495
PRKCQ-AS1	-1.29727
ITIH5	-1.43527
GATA3	9.77091
SFTA1P	-1.32487
CELF2	-1.24206
CCDC3	-1.38007
ITGA8	13.1383
MRC1	10.3781
GAD2	6.48634
APBB1IP	5.18907
MAP3K8	2.40132
ZEB1	26.387
CREM	6.40353
CXCL12	-8.28043
RASSF4	-1.24206
ALOX5	-22.3296
WDFY4	0.331217
C10orf128	-1.40767
DKK1	-3.22937
ZWINT	20.0662
BICC1	-1.46288
FAM13C	-1.35247
CDK1	29.2023
ARID5B	-1.49048
RTKN2	-1.35247
EGR2	18.7414
SRGN	13.1935
COL13A1	-1.29727
PRF1	-15.926
UNC5B	-1.40767
UNC5B-AS1	-1.46288
SPOCK2	-1.35247
PLAU	22.3572
KCNMA1	11.0682
ZCCHC24	-1.32487
PLAC9	-1.15926
LDB3	8.44604
MMRN2	4.52664
SNCG	-1.40767
ADIRF	-1.15926
ACTA2	19.321
CH25H	-11.0958
LIPA	-12.4206
IFIT2	12.1998
IFIT3	12.1998
IFIT1	12.1998
KIF20B	9.05327
HHEX	-1.46288
RBP4	30.9688
PLCE1	18.1341
ENTPD1	14.7944
BLNK	10.2953
SFRP5	-0.745239
CRTAC1	-1.29727
NKX2-3	-1.38007
SCD	4.11261
COL17A1	14.4079
ITPRIP	-1.29727
DUSP5	-0.855644
ADRA2A	15.6224
RGS10	9.38449
BAG3	21.5567
HTRA1	29.9752
DMBT1	7.20397
CUZD1	-1.35247
ADAM12	19.3762
PTPRE	-2.59453
MKI67	28.5399
PRAP1	-1.51808
IFITM1	-13.2211
CDHR5	0.110406
MUC6	17.8581
MUC5AC	19.1002
MUC5B	12.8899
BRSK2	-1.35247
CTSD	34.9158
SYT8	-1.51808
LSP1	10.2677
IGF2	20.7011
C11orf21	-1.02125
TSPAN32	-0.717637
KCNQ1OT1	-1.18686
OR51E1	-1.35247
HBB	16.6989
RIC3	-1.40767
SWAP70	-1.54568
ADM	13.5799
LYVE1	18.2445
MRVI1	-1.26967
DKK3	10.737
PDE3B	45.6804
ABCC8	5.07866
SAA4	9.13608
SAA2	16.4229
SAA1	5.32708
FIBIN	-1.38007
PAX6	27.2702
LMO2	1.82169
EHF	-1.26967
PAMR1	-1.32487
FJX1	-1.18686
C11orf96	-1.21446
TSPAN18	-1.35247
CHST1	18.7966
SPI1	35.385
C1QTNF4	-1.38007
APLNR	4.74745
LPXN	-1.49048
MPEG1	-13.7455
TCN1	10.9026
MS4A6A	-14.96
MS4A4A	4.52664
MS4A7	-7.618
MS4A1	1.15926
MS4A8	-1.38007
SLC15A3	0.0552029
CD6	8.99807
CD5	28.8435
CYB561A3	-1.21446
LRRC10B	-1.35247
SCGB2A1	-1.21446
WDR74	-0.993652
HRASLS2	-1.40767
FERMT3	8.58405
AP003774.1	-1.35247
RASGRP2	-3.7538
CTSW	-1.24206
CST6	-4.83025
CD248	11.5098
TBC1D10C	-1.32487
PTPRCAP	5.38228
ACY3	-1.32487
MRGPRF	-1.24206
CCND1	36.4891
FGF19	30.0856
ANO1	31.6588
FOLR1	-1.51808
FOLR2	-4.55424
STARD10	-1.46288
P2RY6	-1.18686
ARHGEF17	9.5225
UCP2	-1.76649
KCNE3	-1.60088
SLCO2B1	-15.7604
SERPINH1	31.6312
PRCP	13.0831
PRSS23	-0.993652
FZD4	24.2893
CTSC	14.5184
TRPC6	28.2087
BIRC3	3.58819
MMP7	29.3679
MMP10	11.427
MMP1	-11.7858
MMP3	-2.07011
PDGFD	19.1002
GUCY1A2	0.38642
RDX	17.3889
C11orf53	-1.38007
POU2AF1	10.2125
ALG9	-1.35247
CRYAB	18.8518
IL18	-23.3508
NCAM1	28.7331
NNMT	20.3699
CADM1	0.358819
APOA1	23.2404
TAGLN	16.1468
FXYD2	-1.73889
IL10RA	-7.7284
TMPRSS4	-1.40767
SCN4B	-1.13166
CD3E	12.8071
CD3D	-3.809
CD3G	-4.91306
PHLDB1	-1.21446
CXCR5	7.17637
SLC37A4	-1.02125
MCAM	18.0789
THY1	7.53519
TRIM29	7.6456
POU2F3	-5.24427
CRTAM	-5.21667
VWA5A	-1.38007
NRGN	-1.29727
VSIG2	1.29727
ESAM	5.40988
ROBO4	0.828043
FLI1	3.03616
TMEM45B	-1.46288
ADAMTS8	11.2338
ADAMTS15	13.7731
NTM	-1.46288
NRIP2	-1.40767
KCNA5	-0.855644
VWF	-1.18686
CD27	-4.52664
LPAR5	25.7245
LAG3	5.98951
CD4	24.6757
CDCA3	22.9644
C1S	4.47143
C1R	-1.82169
RBP5	-7.756
CD163L1	-1.35247
CD163	-5.21667
SLC2A14	0.138007
SLC2A3	-0.910847
C3AR1	11.1234
CLEC4A	-13.7731
CLEC4E	0.883246
MFAP5	10.4333
KLRG1	21.1427
KLRB1	-4.55424
CLEC2D	7.86641
CLECL1	-1.40767
CD69	1.54568
KLRF1	0.552029
CLEC12A	2.59453
CLEC7A	-6.78995
OLR1	-8.36323
KLRD1	-7.97681
KLRC2	-4.41623
KLRC1	-16.5885
APOLD1	-1.38007
GPRC5A	-1.54568
EMP1	-1.32487
GUCY2C	0.38642
MGP	5.90671
ERP27	-1.35247
RERG	-1.35247
MGST1	-1.04885
RERGL	-1.38007
IAPP	8.25283
KCNJ8	16.9197
ABCC9	-1.68369
BCAT1	-1.65609
LRMP	-0.800442
SSPN	-1.24206
REP15	-1.46288
PTHLH	22.6608
TMTC1	-1.35247
NELL2	-1.35247
SLC38A1	-1.04885
RND1	4.30582
FKBP11	-1.40767
TUBA1A	17.2509
AQP5	10.7094
BIN2	7.47999
ACVRL1	-3.97461
NR4A1	13.1935
KRT7	29.3955
KRT86	-1.32487
KRT81	-1.32487
KRT6B	13.4695
KRT6A	14.1043
KRT5	13.0003
KRT8	25.0069
KRT18	30.2512
IGFBP6	21.7775
ITGB7	25.3657
ITGA5	30.8032
GTSF1	-1.43527
NCKAP1L	6.90036
PPP1R1A	-1.35247
TESPA1	2.95335
ITGA7	8.66685
MMP19	12.0894
IL23A	-17.9685
NDUFA4L2	-1.49048
ARHGAP9	1.24206
AVIL	-1.21446
MSRB3	-1.29727
IFNG	8.00442
CPM	2.23572
LYZ	21.9155
PTPRB	4.94066
TSPAN8	22.3296
PHLDA1	11.979
CSRP2	-1.10406
NTS	12.0618
DUSP6	-0.855644
EPYC	-1.32487
LUM	9.6605
DCN	10.3781
SOCS2	-5.7411
MYBPC1	7.14877
IGF1	-4.22302
PAH	14.9048
TXNRD1	-3.03616
C12orf75	1.21446
NUAK1	-1.29727
TMEM119	-3.67099
SELPLG	0.910847
HVCN1	-1.38007
SDS	-1.21446
TBX3	8.44604
PLA2G1B	-20.2319
OASL	12.1998
WDR66	-1.26967
GJB2	17.0025
SHISA2	-1.38007
FLT1	0.690036
LINC00426	-1.38007
ALOX5AP	-13.4143
MEDAG	-1.24206
HSPH1	20.5079
POSTN	7.36958
RGCC	13.1107
TSC22D1	-1.8493
LCP1	-22.6884
OLFM4	9.24648
PCDH17	-1.07646
PCDH20	-1.35247
PCDH9	-1.43527
KLF5	5.8239
LMO7	-1.54568
KCTD12	25.1449
SCEL	11.0958
EDNRB	7.83881
CLDN10	-0.690036
DOCK9	-1.38007
GPR18	6.04471
GPR183	14.1871
ITGBL1	17.7201
EFNB2	4.91306
TNFSF13B	-7.89401
IRS2	10.6266
COL4A1	17.5545
COL4A2	17.8305
MCF2L	1.26967
F10	13.0279
RPPH1	-1.38007
PNP	26.6354
RNASE6	-10.0469
RNASE1	-1.32487
RNASE2	1.02125
MMP14	-11.4822
DHRS2	-1.35247
ADCY4	20.8391
GZMH	24.5377
GZMB	4.74745
NOVA1	-1.35247
COCH	-1.35247
EGLN3	29.6991
CLEC14A	4.52664
GNG2	10.9026
NID2	2.53933
PTGDR	-1.35247
CDKN3	28.6503
DLGAP5	23.1852
PRKCH	5.63069
HIF1A-AS2	-1.32487
RHOJ	-0.496826
HSPA2	14.8772
GPX2	9.27408
LTBP2	-1.38007
PGF	23.5164
BATF	27.1322
TGFB3	-0.524427
DIO2	6.23792
GPR65	-1.49048
FBLN5	16.9473
LGMN	1.32487
CHGA	38.6972
ASB2	-1.38007
IFI27	17.1957
SERPINA6	33.3977
SERPINA1	18.1065
SERPINA4	12.3654
SERPINA5	9.6605
TCL1A	6.12752
BDKRB2	6.21032
BDKRB1	25.7245
BCL11B	15.1256
DLK1	11.979
MEG3	-1.10406
DIO3	9.71571
AMN	12.4206
TNFAIP2	-1.18686
CKB	-2.26332
PLD4	-1.38007
AHNAK2	-1.26967
GPR132	-1.32487
JAG2	20.0938
CRIP1	-0.38642
NDN	14.4079
APBA2	-1.38007
ARHGAP11B	13.4695
SCG5	2.40132
GREM1	5.90671
RASGRP1	4.88545
THBS1	35.4402
PHGR1	0.552029
GCHFR	-1.24206
RHOV	-7.39718
DLL4	19.8178
NUSAP1	22.4952
ITPKA	2.51173
EHD4	13.2211
PATL2	-1.32487
SORD	-0.276014
DUOX2	5.18907
DUOXA2	12.8899
GATM	-10.1573
C15orf48	-3.11896
FBN1	16.0364
FGF7	24.0961
GLDN	-1.40767
SCG3	20.2319
LINC00926	-1.21446
AQP9	5.96191
CCNB2	29.0091
GCNT3	20.8667
C2CD4B	-1.38007
CA12	1.79409
SNX22	-2.56693
RBPMS2	-1.35247
PIF1	5.8515
RASL12	-1.38007
CILP	25.3105
LOXL1	13.0279
ISLR	-1.49048
STRA6	11.1786
SEMA7A	11.979
NEIL1	-1.32487
CSPG4	1.9045
PSTPIP1	-3.36738
LINGO1	5.49269
BCL2A1	23.6268
IL16	24.4825
HOMER2	-1.38007
NMB	3.8642
NTRK3	0.38642
ISG20	17.1957
ACAN	8.97047
MFGE8	4.33343
ANPEP	41.899
PRC1	23.5716
SYNM	-1.35247
ALDH1A3	4.02981
HBA2	6.90036
HBA1	6.90036
PDIA2	0.331217
MSLN	19.9558
TPSAB1	15.6224
TMEM204	-1.32487
NPW	-1.35247
SLC9A3R2	28.2087
ZG16B	-1.38007
PRSS22	-1.35247
C16orf89	-1.32487
SOCS1	-23.682
TNFRSF17	15.374
PLA2G10	-3.8366
MYH11	22.854
TMC5	-1.49048
GP2	15.6776
CRYM	-1.38007
IGSF6	-2.31852
OTOA	-1.35247
GGA2	11.841
PLK1	37.7312
PRKCB	21.6947
APOBR	-1.32487
NUPR1	-1.35247
CD19	1.71129
LAT	-8.33563
SNX29P2	-1.18686
SPN	8.80486
C16orf54	-1.13166
CORO1A	3.67099
ITGAL	16.1468
ITGAM	23.3232
ITGAX	-0.524427
SNX20	7.59039
MMP2	8.91526
CES1	-2.51173
MT1E	-0.469224
MT1M	-0.469224
MT1A	-0.469224
MT1F	-0.469224
MT1G	-0.469224
MT1H	-0.469224
MT1X	-0.469224
HERPUD1	-1.62848
CCL22	-19.4038
CX3CL1	-1.13166
CCL17	-5.8239
CDH11	17.3613
CDH5	-3.8366
RRAD	-1.51808
CES2	-2.76014
TPPP3	-1.10406
HSD11B2	-1.10406
NQO1	9.10847
HP	3.9194
MAF	17.9409
PLCG2	-1.18686
HSD17B2	0.331217
CDH13	16.0916
DNAAF1	-1.38007
WFDC1	-1.32487
COTL1	3.72619
CRISPLD2	-1.26967
GINS2	23.6544
C16orf74	8.86006
IRF8	32.7077
FOXF1	-0.717637
SLC7A5	4.69224
SNAI3	-1.35247
DPEP1	-3.8366
SERPINF1	12.3378
HIC1	-1.21446
P2RX5	-1.18686
SMTNL2	-1.35247
ARRB2	-5.27187
TM4SF5	16.6437
VMO1	-1.38007
SCIMP	-6.04471
BCL6B	-1.32487
CLEC10A	-1.35247
ASGR1	31.6864
ACAP1	-1.35247
CD68	-0.800442
ATP1B2	-5.35468
KDM6B	17.1405
TMEM88	-1.15926
ALOX15B	-9.6053
TMEM107	-0.910847
AURKB	26.8562
ARHGEF15	7.7284
PIK3R6	-4.71985
GAS7	-7.39718
PMP22	13.3591
CCDC144A	-1.21446
TNFRSF13B	7.17637
RASD1	-1.43527
SNORD3B-1	-1.29727
MFAP4	10.9302
MTRNR2L1	-1.26967
VTN	20.2871
ADAP2	-0.57963
EVI2B	7.618
EVI2A	3.8642
CCL2	-16.9197
CCL7	-19.1278
CCL11	0.276014
CCL8	6.51394
CCL13	-15.7604
SLFN12L	-1.35247
CCL5	0.800442
CCL14	3.20177
CCL15	-2.07011
CCL23	-3.64339
CCL18	22.8264
CCL3	-14.3527
CCL4	10.1021
CCL3L1	-1.40767
CCL4L2	-1.43527
PLXDC1	9.74331
PPP1R1B	1.51808
PNMT	-1.32487
GRB7	9.6329
CSF3	-13.4971
NR1D1	-1.26967
TOP2A	24.1237
TNS4	-1.29727
CCR7	4.02981
KRT23	-1.49048
KRT13	-1.29727
KRT15	-1.32487
KRT14	8.28043
KRT16	14.1043
KRT17	25.6969
JUP	14.0215
CCR10	36.2683
RAMP2	1.9873
AOC3	11.0958
LINC00671	-0.910847
ARL4D	-1.26967
CD300LG	-6.90036
PPY	5.46508
GJC1	-1.35247
HIGD1B	-1.29727
FMNL1	-7.39718
TBX21	-7.92161
SKAP1	14.2699
HOXB-AS1	-1.43527
NGFR	23.682
SGCA	-1.24206
COL1A1	38.5316
TMEM100	-1.32487
SEPT4	6.81755
CA4	11.4822
TBX2	13.2211
MRC2	13.8835
LIMD2	-1.57328
CD79B	5.49269
ICAM2	6.23792
KPNA2	10.3505
SLC16A6	-1.32487
ABCA8	-1.40767
ABCA6	-1.38007
KCNJ16	-1.35247
KCNJ2	22.8816
SOX9	28.7607
SSTR2	-0.496826
CD300A	-12.8071
CD300E	-13.9939
RAB37	-1.35247
CD300LF	2.12531
CASKIN2	-1.24206
CYGB	-1.40767
SEC14L1	-1.26967
TMC8	8.39084
TK1	26.525
BIRC5	30.5272
SOCS3	-27.8498
C1QTNF1	-1.43527
CD7	-4.08501
COLEC12	-1.35247
TYMS	25.0345
PTPRM	20.7839
APCDD1	-1.29727
LAMA3	20.9219
TTR	8.99807
SLC14A1	-1.35247
PSTPIP2	-4.47143
LIPG	7.20397
ONECUT2	-1.43527
PMAIP1	22.6332
RNF152	-1.29727
BCL2	23.958
SERPINB5	20.4527
SERPINB3	7.7836
SERPINB7	-1.38007
SERPINB2	-8.66685
CDH19	-1.35247
CCDC102B	-1.32487
NFATC1	-1.07646
TRIB3	23.13
SIRPG	-13.9663
SIGLEC1	23.406
PCNA	28.8159
CHGB	-4.88545
PLCB1	22.992
LAMP5	-1.35247
ISM1	5.90671
MACROD2	-1.32487
PCSK2	7.50759
RIN2	-0.855644
NKX2-2	10.6266
LINC00261	-1.32487
THBD	16.6161
CD93	1.9597
CST4	6.01711
CST1	6.76235
CST2	3.72619
CST7	19.459
REM1	-1.32487
ID1	19.459
COX4I2	-1.49048
TPX2	17.8857
FOXS1	-1.32487
HCK	18.9622
BPIFB1	-1.35247
PROCR	-14.1595
MYL9	25.6693
SLA2	-4.85785
TGM2	2.31852
MAFB	-4.88545
MYBL2	28.7883
WISP2	-1.40767
PI3	13.1935
SLPI	16.1468
SDC4	16.34
WFDC2	-2.76014
UBE2C	9.41209
TNNC2	11.2338
PLTP	11.2614
MMP9	18.0237
PREX1	1.65609
PTGIS	11.8686
SNAI1	26.4974
BCAS4	-1.54568
NFATC2	17.6373
BCAS1	-1.43527
CBLN4	-1.35247
AURKA	29.9752
PCK1	-1.9873
ZBP1	-1.38007
PMEPA1	-1.02125
CTSZ	28.2915
PHACTR3	-1.26967
COL9A3	6.76235
BIRC7	10.3505
SOX18	16.1744
RGS19	7.7008
MADCAM1	-11.8134
GZMM	3.72619
FSTL3	9.6881
CFD	5.46508
JSRP1	-1.40767
GADD45B	14.9876
GNG7	12.4206
S1PR4	8.97047
MATK	18.1893
EBI3	-5.65829
TMIGD2	-8.17002
MIR7-3HG	-1.32487
PTPRS	20.6183
DENND1C	-1.29727
CD70	-19.1554
C3	9.05327
INSR	20.5355
RETN	0.77284
FCER2	-0.19321
CD320	-1.15926
KANK3	-1.32487
ANGPTL4	14.4079
MYO1F	7.31438
MUC16	5.18907
COL5A3	12.0342
ICAM1	-3.809
S1PR5	-1.32487
LDLR	14.2975
CNN1	13.7455
ACP5	23.5164
LYL1	10.1297
ASF1B	25.6141
PTGER1	-6.81755
DNAJB1	30.3616
NOTCH3	11.3994
RASAL3	-0.855644
KLF2	13.9387
F2RL3	18.8794
PLVAP	-0.138007
FAM129C	-1.29727
IL12RB1	-28.4295
IFI30	-13.8835
PDE4C	19.5418
GDF15	11.151
LRRC25	-1.35247
CRLF1	7.25918
COMP	21.6395
PLEKHF1	-1.32487
CEBPA	-1.15926
FXYD3	-6.84516
LGI4	-1.35247
FXYD1	-5.35468
LSR	9.38449
HAMP	-5.63069
CD22	19.0174
DMKN	-0.938449
HSPB6	18.6034
HCST	2.76014
TYROBP	21.9431
SIPA1L3	-1.29727
PPP1R14A	13.2763
C19orf33	2.23572
MAP4K1	-2.53933
LGALS7B	-1.40767
LGALS4	31.8797
NCCRP1	-1.35247
GMFG	0.828043
SUPT5H	-0.607232
FCGBP	1.57328
PRX	8.17002
MIA	10.0193
AXL	2.26332
CEACAM4	-1.35247
CEACAM7	-1.49048
CEACAM5	27.8498
CEACAM6	10.4057
CD79A	21.2531
POU2F2	-4.85785
CXCL17	-1.49048
CEACAM1	9.82611
LYPD3	-0.524427
PLAUR	-2.23572
BCAM	-1.49048
APOE	14.4356
APOC1	13.4143
APOC2	13.2763
FOSB	25.1449
GPR4	2.31852
IGFL2	-1.13166
HIF3A	-2.18051
PTGIR	3.8918
C5AR1	12.7795
LMTK3	-1.38007
RASIP1	-1.24206
HRC	-1.38007
CD37	-0.0552029
FLT3LG	3.50538
ADM5	0.57963
IL4I1	11.565
ATF5	5.87911
SPIB	6.70715
CLEC11A	-1.15926
KLK1	26.1386
KLK6	10.5713
KLK7	-6.62434
KLK8	4.36103
KLK10	-1.54568
KLK11	-1.46288
NKG7	1.9321
SIGLEC10	14.0767
HAS1	-1.32487
FPR1	12.0618
FPR2	6.81755
FPR3	26.6906
ZNF331	-1.46288
OSCAR	2.40132
LILRB2	19.4314
LILRA5	-9.16368
LAIR1	-2.40132
TTYH1	-1.43527
LAIR2	-1.35247
LILRB1	-1.21446
LILRB4	-9.16368
EPS8L1	16.2848
TNNT1	7.14877
IL11	-9.19128
UBE2S	7.7008
EIF1AY	-1.18686
CLDN5	5.18907
IGLL5	-10.875
RGL4	-1.35247
VPREB3	3.67099
MMP11	1.13166
DERL3	-1.43527
SUSD2	-1.40767
GGT5	-0.38642
GGT1	5.38228
MIAT	-1.38007
XBP1	16.5885
LIF	-18.0789
OSM	-11.013
PIK3IP1	-1.29727
TIMP3	1.24206
HMOX1	1.32487
MCM5	26.0282
RASD2	11.8134
APOL1	10.7646
NCF4	4.88545
IL2RB	-8.08722
RAC2	15.7052
CYTH4	3.9194
LGALS2	-1.02125
LGALS1	6.01711
APOBEC3A	1.65609
APOBEC3C	1.65609
APOBEC3G	16.8369
APOBEC3H	1.65609
PDGFB	20.8943
GRAP2	-2.70494
MEI1	-1.32487
CENPM	24.1789
RNU12	-1.15926
PARVG	6.45874
FBLN1	9.30168
GTSE1	23.3232
KLHDC7B	-1.35247
SHANK3	-1.32487
SAMSN1	-1.60088
MIR155HG	-1.32487
JAM2	16.1468
CYYR1	-1.40767
ADAMTS1	14.546
ADAMTS5	12.3654
MAP3K7CL	-1.35247
C21orf62	-1.35247
KCNE1	2.84295
RCAN1	-1.35247
CLDN14	-1.35247
KCNJ15	-1.35247
ERG	21.7499
PCP4	-1.26967
FAM3B	-1.40767
MX2	17.1957
MX1	12.1998
[truncated: 66 more rows]

## Sheet: 2. Marker genes P value
Gene	P-value
ISG15	4.41466e-21
TNFRSF18	5.22953e-05
TNFRSF4	4.41466e-21
MXRA8	0.674876
VWA1	0.385109
MMP23B	0.664825
GABRD	0.664825
ACOT7	0.664984
TNFRSF25	9.07717e-05
TNFRSF9	5.44574e-20
ERRFI1	0.664984
RBP7	0.664825
FBXO2	0.664825
TNFRSF1B	3.90599e-05
PDPN	0.191636
HSPB7	0.833438
MFAP2	2.30695e-20
PADI2	0.664984
PADI1	0.664825
AKR7A3	0.664825
RNF186	0.664825
PLA2G2A	0.000972674
PLA2G5	0.172241
CDA	1.38511e-37
ALPL	1.86014e-41
HSPG2	0.068474
C1QA	8.12014e-18
C1QC	0.664825
C1QB	0.781455
ID3	1.3638e-25
CNR2	0.531781
RUNX3	1.1277e-22
STMN1	2.07365e-14
FAM110D	0.664825
CD52	0.112692
ZNF683	0.664825
SFN	1.63707e-08
TRNP1	0.664825
FCN3	0.0530843
FGR	4.78769e-73
IFI6	1.00409e-14
THEMIS2	0.664825
SNHG12	0.664825
LAPTM5	0.088256
FABP3	0.0270357
COL16A1	0.00213593
FAM167B	0.664825
LCK	2.6506e-32
GJA4	1.88061e-07
CLSPN	3.32819e-26
COL8A2	2.72178e-10
CSF3R	6.61014e-06
CDCA8	4.36032e-26
HEYL	1.911e-13
CITED4	0.000330244
EDN2	3.1602e-38
SLC2A1	2.69539e-60
TIE1	0.425824
CDC20	4.49519e-44
C1orf228	0.664825
PTCH2	0.664984
PIK3R3	2.40032e-08
TSPAN1	0.351821
PDZK1IP1	0.664825
PODN	0.664825
TACSTD2	3.23296e-25
FGGY	0.664825
LEPR	0.696998
PDE4B	5.46706e-52
SGIP1	0.0959862
GADD45A	3.02514e-33
DIRAS3	0.664825
PTGER3	0.734177
NEGR1	0.664825
NEXN	0.664825
DNAJB4	4.81814e-22
IFI44L	1.32055e-09
CYR61	8.17984e-41
GBP1	0.000254131
GBP4	0.664825
GBP5	0.00794701
TGFBR3	3.51928e-16
GFI1	0.275567
ARHGAP29	0.664825
F3	0.0470008
PALMD	0.674876
VCAM1	0.664825
S1PR1	0.748783
COL11A1	0.19223
AMY2B	0.773808
KIAA1324	0.664825
KCNA3	0.000286441
CD53	7.12056e-32
DENND2D	0.664825
CHI3L2	0.664825
C1orf162	3.8509e-05
PTPN22	2.47501e-15
OLFML3	0.711186
NGF	0.990675
CASQ2	0.00136852
CD2	8.1218e-11
FAM46C	0.664825
PHGDH	0.000267215
HMGCS2	0.392692
REG4	0.1965
FCGR1B	0.294639
ITGA10	2.58506e-08
GJA5	2.07365e-14
FCGR1A	0.71921
HIST2H2AA3	1.1327e-44
HIST2H2BE	1.15911e-31
ECM1	0.0350538
CTSS	1.01922e-16
CTSK	2.12645e-47
C1orf56	0.664825
MLLT11	0.718529
SPRR1B	5.63964e-13
S100A9	0.000177814
S100A12	0.000910838
S100A8	0.275567
S100A7	0.0962673
S100A2	0.982773
S100A14	0.664825
S100A1	5.5434e-20
SHE	0.664825
KCNN3	0.67011
EFNA1	0.186955
MUC1	3.15195e-07
NES	1.53069e-14
CRABP2	0.664825
SH2D2A	2.21393e-05
FCRL5	0.575811
FCRL3	0.125683
FCRL2	0.575811
FCRL1	0.433355
CD1D	0.000280573
CD1C	0.000217807
CD1E	0.000750733
MNDA	0.00320379
PYHIN1	0.664825
AIM2	0.0288852
CADM3	0.00473981
FCER1A	0.00025071
CRP	4.09862e-08
SLAMF8	6.18073e-11
SLAMF9	0.0739103
LINC01133	0.653083
ATP1A2	0.0393805
SLAMF6	0.0631876
CD84	0.0197917
SLAMF1	1.71451e-19
CD48	4.15017e-24
SLAMF7	4.35417e-05
LY9	4.35417e-05
ITLN1	6.36037e-06
ARHGAP30	0.67011
ADAMTS4	1.09995e-11
FCER1G	3.20886e-10
MPZ	0.00340669
FCGR2A	0.0962673
HSPA6	4.34941e-11
FCGR3A	0.0143912
FCGR2B	6.51579e-13
FCRLA	0.663244
OLFML2B	0.664825
DDR2	3.90599e-05
RGS4	1.47314e-05
RGS5	1.47314e-05
NUF2	1.1892e-25
GPA33	2.17618e-06
CD247	0.0107565
RCSD1	0.664825
XCL2	0.370238
XCL1	3.39752e-30
DPT	1.93271e-10
ATP1B1	0.0393805
SLC19A2	0.664825
SELP	4.90215e-11
SELL	4.2626e-05
SELE	2.53822e-14
PRRX1	1.03253e-07
FMO3	0.96642
FMO2	0.96642
FMO1	0.96642
TNFSF4	1.12936e-09
ANGPTL1	5.61337e-06
IER5	0.664825
RGS16	1.47314e-05
NPL	0.664825
LAMC2	6.58459e-40
NCF2	1.09995e-11
FAM129A	0.664825
PRG4	0.568906
PTGS2	0.000254131
RGS18	0.00403237
RGS1	2.63973e-06
RGS13	1.47314e-05
RGS2	6.28076e-10
CFH	0.825392
CFHR1	0.362949
ASPM	1.84389e-26
PTPRC	1.00409e-14
LMOD1	3.18588e-19
ELF3	0.49651
PTPN7	0.664825
PPP1R12B	1.26347e-23
CHI3L1	1.73057e-18
CHIT1	3.38024e-07
BTG2	3.82659e-20
FMOD	0.000399045
PRELP	0.00455183
LAX1	7.57739e-05
KISS1	0.51355
NFASC	0.664825
NUAK2	0.664825
CTSE	9.54757e-09
RASSF5	8.07744e-06
IL10	6.04849e-09
PIGR	0.433355
C4BPA	0.664825
CD55	0.664825
CR2	0.0726326
CR1	0.906875
CD34	0.0512514
MIR205HG	0.689732
LAMB3	3.03612e-11
G0S2	0.362949
HSD11B1	0.958914
TRAF3IP3	0.664825
ATF3	0.0138951
PROX1	0.000218956
CENPF	2.04427e-24
FAM177B	0.664825
CAPN8	0.664825
LEFTY1	7.18866e-05
AGT	3.60644e-07
SIPA1L2	0.664825
NID1	0.00131001
NLRP3	5.65618e-16
SH3YL1	0.00296242
PXDN	0.664825
COLEC11	3.5944e-08
SOX11	0.0124697
RSAD2	8.94061e-08
ID2	0.000136899
RRM2	3.30628e-22
VSNL1	0.664825
OSR1	0.664825
LINC00954	0.664825
MATN3	7.00714e-46
SDC1	5.04874e-14
ADCY3	1.41881e-29
CENPA	2.58082e-40
EMILIN1	0.0212316
TRIM54	0.49651
LBH	0.664825
LTBP1	2.08723e-05
RASGRP3	1.93271e-10
AC073218.2	0.664825
QPCT	0.664825
CYP1B1	0.000280573
TMEM178A	0.664825
SLC8A1	0.0106197
SLC3A1	0.070494
EPAS1	1.55737e-05
BCYRN1	0.664825
EPCAM	9.94919e-07
EFEMP1	6.27009e-08
BCL11A	3.77908e-14
PLEK	1.14824e-13
ARHGAP25	0.664825
ANTXR1	0.0171855
ANXA4	0.0219969
MXD1	0.664825
DYSF	0.664825
ACTG2	8.4616e-19
MTHFD2	7.18866e-05
HK2	2.47813e-06
REG1A	0.464315
REG3A	0.664825
SH2D6	0.664825
GNLY	0.646825
ATOH8	0.664825
CD8A	4.33626e-20
CD8B	0.0646274
FABP1	1.96159e-37
MAL	0.00579614
LINC00342	0.664825
ANKRD36C	0.664825
GPAT2	0.84168
ADRA2B	0.664825
DUSP2	0.748783
ZAP70	1.27502e-05
AFF3	0.664825
IL1R2	1.24477e-19
IL1RL1	0.664984
IL18R1	2.22695e-16
C2orf40	0.664825
SULT1C2	0.664825
MALL	0.674876
AC017002.1	0.664825
FBLN7	0.664825
CKAP2L	3.18052e-18
IL1B	1.51149e-09
IL1RN	2.28793e-05
MARCO	7.73988e-07
TMEM37	0.664825
SCTR	0.577596
INHBB	4.35417e-05
LIMS2	0.664825
LYPD1	0.664825
CXCR4	0.000818492
KYNU	0.0099814
RND3	0.664825
TNFAIP6	0.464315
NR4A2	3.64081e-17
CYTIP	0.000254131
CD302	0.664825
GCG	9.52236e-54
FAP	4.64827e-06
SLC38A11	0.664825
SCN3A	0.664825
SCN7A	0.664825
NOSTRIN	0.00160942
SPC25	9.35465e-28
G6PC2	0.789626
KLHL23	0.67011
ITGA6	1.67898e-63
RAPGEF4	2.63973e-06
CDCA7	1.09995e-11
GPR155	0.664825
CHN1	0.0149029
ITGA4	2.23131e-07
NEUROD1	5.47284e-16
FRZB	6.74851e-06
CALCRL	0.472747
TFPI	0.078778
COL3A1	4.46257e-09
COL5A2	0.00736493
SLC40A1	0.696998
STAT4	0.682119
HECW2	0.664825
ANKRD44	0.664825
CD28	0.51355
CTLA4	0.220091
ICOS	1.27502e-05
NRP2	0.109628
CPS1	0.982773
FN1	1.99994e-13
IGFBP2	2.41737e-36
IGFBP5	2.39089e-07
GPBAR1	3.61151e-06
SLC11A1	0.807206
CYP27A1	1.46423e-07
WNT6	2.08723e-05
PTPRN	0.789626
DES	3.49215e-05
EPHA4	0.0545179
KCNE4	0.264282
SCG2	0.385109
SERPINE2	0.0765632
TM4SF20	0.664825
CCL20	3.49624e-07
SP140	0.664825
ITM2C	0.664825
ECEL1	0.664825
EFHD1	0.664825
INPP5D	0.246204
ACKR3	6.81887e-05
COL6A3	1.81191e-07
RAMP1	0.472747
HES6	0.598038
PASK	0.664825
PDCD1	0.101253
LMCD1	0.664825
SSUH2	0.664825
SRGAP3	8.16713e-07
GHRL	3.25571e-41
TIMP4	0.270116
FBLN2	0.0111399
SLC6A6	0.664825
ANKRD28	0.664825
OXNAD1	0.664825
RFTN1	0.664825
ZNF385D	0.664825
EOMES	9.72371e-35
CMC1	0.664825
RBMS3	0.664825
TGFBR2	0.664825
SUSD5	0.664825
CX3CR1	0.441338
CCK	5.63225e-09
SNRK	0.748783
CLEC3B	0.664825
TMEM158	0.689732
CXCR6	6.78371e-31
CCR1	0.101253
CCR2	0.0189059
CCR5	4.91049e-31
LTF	1.17207e-06
PTH1R	4.12042e-48
HYAL2	2.63117e-21
CISH	0.00954287
SEMA3G	0.00386572
TNNC1	0.00299801
STAB1	0.200842
MUSTN1	0.664825
WNT5A	8.94061e-08
DNASE1L3	0.664825
FAM107A	0.664825
FAM3D	0.664825
PTPRG	0.664825
ADAMTS9	3.04197e-44
EPHA3	0.00125381
COL8A1	8.72394e-07
FILIP1L	0.664825
TMEM45A	0.664825
ABI3BP	0.664825
TRAT1	0.664825
CD96	0.00014422
ZBED2	0.664825
GCSAM	0.664825
CD200	0.0129068
BTLA	7.28252e-07
CCDC80	0.711186
BOC	0.664984
SIDT1	0.664825
SIDT1-AS1	0.664825
TIGIT	0.392692
LSAMP	0.664825
UPK1B	0.664825
PLA1A	0.49651
FSTL1	0.0576773
EAF2	0.664825
CD86	6.28569e-14
CSTA	0.000399045
PARP15	0.664825
MYLK	8.88492e-26
MUC13	4.26321e-22
HEG1	0.664825
GATA2	0.0171855
HMCES	0.664825
BFSP2	0.45645
SLCO2A1	0.0631876
CLDN18	0.664825
RBP1	0.664825
CLSTN2	7.57739e-05
PCOLCE2	5.84419e-08
CHST2	1.62624e-17
AGTR1	0.000327371
CPB1	6.81637e-10
CP	1.21989e-21
TM4SF18	0.674876
TM4SF1	5.0564e-08
TM4SF4	0.664984
GPR171	0.664825
P2RY14	0.664984
P2RY13	0.664984
SUCNR1	0.664825
MME	9.40052e-22
KCNAB1	0.220091
PTX3	0.664825
LXN	1.1544e-10
RARRES1	0.664825
ARL14	0.664825
SPTSSB	0.674876
SERPINI1	2.98465e-06
MECOM	0.664825
CLDN11	0.00437558
LAMP3	0.0261183
KLHL6	0.990675
LIPH	0.49651
ST6GAL1	4.76389e-24
SST	1.04206e-45
HES1	2.01818e-16
FAM43A	0.664825
APOD	0.311347
MUC20	4.26321e-22
MUC4	2.98465e-06
TFRC	0.00142011
CPLX1	0.950449
SPON2	1.64842e-37
LYAR	0.711186
NSG1	0.664825
CYTL1	0.63453
JAKMIP1	0.664825
S100P	0.00232833
HTRA3	0.664825
CLNK	0.664825
HS3ST1	0.51355
CD38	3.07593e-14
FGFBP1	0.252448
FGFBP2	0.0134
PROM1	0.204951
LDB2	2.94843e-07
SLIT2	2.95226e-10
SOD3	0.246204
SLC34A2	5.13952e-13
TLR10	0.000148025
TMEM156	0.664825
SMIM14	0.664825
RHOH	5.22309e-09
UCHL1	1.36446e-39
LIMCH1	0.664825
GABRA2	0.664825
CNGA1	0.664825
TXK	0.056125
RASL11B	0.664825
PDGFRA	0.186955
KIT	1.1277e-22
KDR	8.44893e-05
NMU	0.0065381
HOPX	0.664825
SPINK2	0.00855632
STAP1	5.17014e-32
UGT2B15	0.958914
UGT2A3	0.0362372
UGT2B7	0.595341
SULT1E1	0.718529
ODAM	0.664825
FDCSP	0.664825
DCK	2.16053e-82
SLC4A4	4.2112e-58
GC	5.67705e-27
RASSF6	0.664825
CXCL6	9.28887e-12
CXCL1	6.49691e-14
CXCL5	3.58213e-09
CXCL3	8.62225e-19
CXCL2	2.84303e-11
EREG	4.74353e-07
AREG	7.51409e-23
PARM1	0.664825
CXCL9	0.664825
CXCL10	1.00605e-11
CXCL11	3.64081e-17
SHROOM3	0.664825
CXCL13	8.32951e-13
LINC01094	0.664825
SCD5	0.0631876
PLAC8	0.0842792
ARHGAP24	0.664825
SPP1	4.159e-55
PPM1K	0.664825
HERC5	0.00149284
SNCA	3.85998e-07
MMRN1	0.664825
HPGDS	0.270116
ADH6	0.0307111
ADH1B	0.0307111
DAPP1	0.0129068
DDIT4L	0.84168
EMCN	0.664825
BANK1	0.401699
CENPE	1.3638e-25
LEF1	2.19776e-38
ENPEP	1.05015e-56
ANK2	0.674876
SYNPO2	0.833438
FABP2	0.362949
MAD2L1	5.76915e-35
TNIP3	0.056125
CCNA2	1.66249e-69
SPRY1	0.742996
SLC7A11	0.696998
EDNRA	1.88364e-31
TMEM154	0.664825
TLR2	0.000136899
SFRP2	5.45973e-05
TDO2	0.0099814
FAM198B	0.664825
NPY1R	0.857954
MARCH1	1.25991e-10
CPE	0.664825
TLL1	0.664825
ANXA10	0.704272
PALLD	0.872907
HMGB2	2.48608e-19
SCRG1	0.664825
HAND2	3.66303e-29
HAND2-AS1	0.664825
HPGD	0.351821
VEGFC	7.78911e-26
ACSL1	0.0111399
ANKRD37	0.664825
PDLIM3	0.889982
SORBS2	0.872907
IRX2	0.664825
C5orf38	0.664825
SEMA5A	7.39645e-10
FAM105A	0.664825
BASP1	0.664825
CDH6	0.664825
NPR3	0.664825
C1QTNF3	0.664825
RAI14	0.664825
IL7R	0.00189985
SLC1A3	2.07365e-14
LIFR	0.727624
PTGER4	0.489724
C7	1.22652e-20
C6	1.48779e-28
HMGCS1	7.15927e-06
CCL28	0.000280573
EMB	0.664825
ITGA1	0.0959862
ITGA2	0.00455183
FST	0.51355
ARL15	0.664825
ESM1	0.000123458
GZMK	0.489724
GZMA	5.83002e-07
PLK2	2.14262e-55
GAPT	0.664825
RAB3C	0.664825
ADAMTS6	1.12166e-09
CD180	0.00214751
CCNB1	6.02016e-39
MAP1B	0.664825
ENC1	0.664825
F2RL2	0.974371
F2R	0.00455183
THBS4	4.30328e-12
VCAN	0.000654267
EDIL3	0.674876
MEF2C	5.75948e-05
LUCAT1	0.664825
NR2F1	3.80244e-09
MCTP1	0.664825
PCSK1	4.30328e-12
TSLP	0.205256
CAMK4	0.49651
NREP	0.734177
CDO1	6.75033e-08
PRR16	0.664825
LOX	0.00326388
LMNB1	2.08723e-05
SLC12A2	5.92493e-68
TCF7	2.80521e-14
CXCL14	9.61732e-08
TGFBI	0.314115
SPOCK1	2.95226e-10
MZB1	0.23043
ECSCR	0.664825
HBEGF	0.559378
CD14	3.15275e-50
PCDH12	0.664825
DPYSL3	0.664825
C5orf46	0.664825
SPINK5	8.94061e-08
ADRB2	4.13565e-05
MIR145	0.664825
SLC26A2	9.66677e-66
CSF1R	1.68948e-22
PDGFRB	1.83421e-09
GPX3	0.0143912
CCDC69	0.664825
GM2A	0.664825
SPARC	5.10988e-143
HAVCR2	0.0261183
ITK	0.000397868
CYFIP2	0.0102418
ADAM19	0.664825
EBF1	0.0662099
C1QTNF2	0.664825
PTTG1	3.72381e-25
ATP10B	0.664825
HMMR	3.82091e-26
SLIT3	4.43417e-07
DOCK2	1.29406e-17
LCP2	6.4252e-18
KCNMB1	0.174692
GABRP	0.664825
NEURL1B	4.33338e-15
STC2	0.0223335
CPEB4	3.00799e-08
HRH2	0.664825
ADAMTS2	1.23673e-05
LTC4S	0.0662099
SCGB3A1	0.664825
BTNL9	0.664825
IRF4	1.57039e-07
SERPINB9	1.97306e-05
TUBB2A	4.81814e-22
TUBB2B	2.34888e-24
NRN1	0.664825
F13A1	4.64827e-06
LY86	0.178338
NEDD9	2.58506e-08
EDN1	6.3058e-24
PHACTR1	0.664825
GFOD1	0.664825
CD83	5.2944e-17
ID4	0.727624
SOX4	0.0076468
DCDC2	0.67011
GMNN	5.68433e-25
SCGN	0.664825
SLC17A4	0.664984
HIST1H1C	2.80667e-37
HIST1H4C	5.93891e-50
HIST1H1E	1.29406e-17
HIST1H2BD	6.27009e-08
HIST1H1D	3.80564e-10
HIST1H2BJ	1.18955e-07
HIST1H2AK	1.20609e-11
HIST1H1B	1.75666e-47
UBD	1.97306e-05
HLA-G	0.0099814
RNF39	0.664825
TRIM31	0.664825
SFTA2	0.664825
DPCR1	0.674876
C6orf15	0.664825
LTA	0.00886796
TNF	6.21887e-13
LTB	0.00149284
LST1	1.03253e-07
NCR3	0.258314
AIF1	0.0297766
HSPA1A	0.756854
HSPA1B	0.16681
C2	0.00886796
CFB	0.531781
TNXB	0.45645
GPSM3	0.664825
NOTCH4	1.17922e-36
HLA-DRA	1.30144e-30
HLA-DRB5	3.07593e-14
HLA-DQA1	1.27206e-07
HLA-DQB1	3.07593e-14
HLA-DQA2	1.27206e-07
HLA-DQB2	3.07593e-14
HLA-DOB	0.664825
HLA-DMB	0.664825
HLA-DOA	4.07187e-08
HLA-DPA1	1.46667e-15
HLA-DPB1	3.07593e-14
HMGA1	1.69883e-14
DEF6	0.664825
C6orf222	0.664825
CPNE5	0.664825
PI16	0.933387
FGD2	0.664825
KCNK17	0.664825
MOCS1	2.80521e-14
APOBEC2	0.664825
TREM2	0.664825
TREM1	5.78722e-19
PGC	0.872907
PTK7	0.000197251
RUNX2	1.14421e-86
RCAN2	0.664825
PLA2G7	2.30024e-14
GSTA2	0.0288852
GSTA1	0.16681
COL9A1	1.20388e-08
OGFRL1	0.664825
COL12A1	3.15195e-07
FILIP1	0.664825
FAM46A	0.664825
CNR1	2.37212e-06
RNGTT	0.0317345
BACH2	8.2499e-22
FHL5	0.643518
PRDM1	0.00513706
QRSL1	0.664825
SCML4	0.664825
SESN1	0.664825
SLC16A10	0.380142
COL10A1	4.12428e-49
FAM162B	0.664825
PLN	0.000463456
GJA1	0.000169115
PKIB	0.664825
HEY2	5.04111e-39
NCOA7	0.664825
CENPW	4.6829e-41
RSPO3	4.62367e-19
THEMIS	0.334485
LAMA2	1.46804e-43
SAMD3	0.664825
AKAP7	0.864366
ENPP1	1.21904e-43
CTGF	4.80557e-15
MOXD1	0.664825
VNN1	0.664825
VNN2	0.000511029
TCF21	0.664825
SGK1	2.01138e-28
TNFAIP3	1.75226e-05
CITED2	5.94208e-15
SASH1	0.664825
AKAP12	7.8939e-83
MYCT1	0.664825
IPCEF1	0.664825
SYTL3	0.664825
TAGAP	6.67278e-07
FNDC1	0.664825
SOD2	8.94061e-08
CCR6	0.664825
SMOC2	0.664825
THBS2	1.03951e-51
DLL1	2.04427e-24
PDGFA	8.47977e-14
GPR146	0.664825
ZFAND2A	0.664825
FSCN1	0.0307111
THSD7A	1.12166e-09
SOSTDC1	0.664825
AGR2	0.924517
AGR3	0.849819
TWIST1	3.49177e-39
MACC1	0.664825
ITGB8	1.90526e-08
IL6	1.03807e-13
GPNMB	8.16713e-07
SNX10	0.664825
HOTAIRM1	0.664825
CREB5	0.664984
CPVL	0.664825
INMT	0.00204532
AQP1	0.664825
ANLN	8.88492e-26
AOAH	0.664825
ELMO1	4.36831e-23
SFRP4	0.0129068
SUGCT	0.664825
INHBA	2.98465e-06
AEBP1	0.756854
MYO1G	2.74838e-07
SNHG15	0.664825
RAMP3	0.49651
IGFBP1	4.12311e-45
IGFBP3	4.37188e-08
IKZF1	2.94861e-05
GRB10	6.21075e-49
CLDN3	2.68317e-12
CLDN4	0.0307111
ELN	4.74353e-07
LAT2	0.45645
NCF1	0.0209058
CCL26	0.664825
UPK3B	0.664825
FGL2	9.17836e-13
CD36	4.36032e-26
SEMA3C	0.00386572
ABCB4	0.924517
STEAP4	0.664825
STEAP1	0.664825
FZD1	0.0115601
HEPACAM2	0.664825
TFPI2	0.00386572
GNG11	0.0399174
COL1A2	0.000995057
PEG10	0.0235521
PDK4	0.664825
DLX5	5.68433e-25
NPTX2	0.664825
TMEM130	0.664825
CYP3A5	6.04849e-09
AZGP1	1.33744e-57
STAG3	0.664825
PVRIG	0.664825
PILRA	8.66338e-09
PCOLCE	0.129113
MUC17	4.26321e-22
SERPINE1	0.0662099
CLDN15	0.664825
ORAI2	2.08204e-07
RASA4	0.664825
LRRC17	0.664825
CCDC71L	0.664825
PIK3CG	0.334485
LRRN3	0.664825
CAV1	0.074683
CFTR	3.48536e-13
HILPDA	0.664984
MEST	1.69001e-09
PODXL	0.225214
AKR1B10	0.0235521
CALD1	7.34387e-21
PTN	4.88397e-05
ZC3HAV1	0.664825
TBXAS1	0.275567
CLEC5A	7.04962e-09
PRSS1	0.71921
PIP	2.63117e-21
RARRES2	0.000910838
GIMAP8	0.152776
GIMAP7	0.637621
GIMAP4	0.152776
GIMAP6	0.152776
GIMAP1	1
GIMAP5	0.0138951
TMEM176B	0.664825
AOC1	0.664825
NOS3	0.0076468
INSIG1	0.0833667
CSF2RA	2.25908e-15
IL3RA	0.0160216
P2RY8	0.942431
MXRA5	0.664825
NLGN4X	0.664825
TLR7	0.068474
EGFL6	0.664825
GPM6B	0.664825
ASB9	0.547464
BMX	0.664825
ACE2	2.03308e-54
AP1S2	0.63453
CXorf21	0.664825
GK	0.281578
TMEM47	0.664825
CYBB	0.711186
SRPX	0.664825
RPGR	0.664825
TSPAN7	0.664825
GPR34	0.711186
GPR82	0.664825
CXorf36	0.664825
CFP	8.44485e-08
WAS	0.664825
PCSK1N	0.817246
PIM2	3.80244e-09
FOXP3	0.0983774
VSIG4	0.204951
IL2RG	8.94061e-08
CXCR3	0.236063
CYSLTR1	0.246896
P2RY10	0.664825
ITM2A	0.664825
BTK	0.0576773
TCEAL2	0.664825
BEX5	0.664825
TMSB15A	0.664825
BEX1	6.28076e-10
BEX2	0.0480581
ZCCHC18	0.664825
CLDN2	0.748783
VSIG1	0.664984
CHRDL1	0.664825
SLC6A14	0.664825
SOWAHD	0.664825
SH2D1A	1.46773e-06
SASH3	0.898956
RAB33A	0.664825
GPC3	0.764729
MIR503HG	0.664825
FHL1	0.664825
CD40LG	0.056125
HMGB3	0.664825
CSAG1	0.664825
BGN	2.98465e-06
SLC6A8	0.547464
SSR4	0.664825
F8	0.974371
CLIC2	0.664825
MYOM2	5.71743e-23
ANGPT2	1.71451e-19
DEFB1	0.982773
CLDN23	0.0410362
SOX7	0.664825
BLK	0.00375867
CTSB	1.55688e-09
TUSC3	0.664825
MSR1	0.0410362
SLC7A2	0.664825
PDGFRL	0.664825
MTUS1	0.664825
LPL	5.21963e-19
LZTS1	0.664825
DOK2	0.857954
EGR3	0.0765632
LOXL2	0.000719822
STC1	0.664825
ADAMDEC1	0.664825
EBF2	0.664825
CLU	5.14562e-17
PNOC	0.664825
DUSP4	0.748783
NRG1	3.60644e-07
FGFR1	0.00603006
IDO1	6.35379e-18
SFRP1	0.781518
PLAT	8.00729e-05
SNAI2	5.14329e-72
SOX17	2.13132e-26
SDR16C5	0.0026561
TOX	0.664825
AC022182.3	0.664825
MYBL1	0.664825
PREX2	0.664825
SULF1	7.04962e-09
SBSPON	1.12166e-09
PI15	0.664984
STMN2	0.664825
HEY1	2.73602e-28
PAG1	6.54641e-09
FABP5	0.0107565
FABP4	1.62509e-10
CA3	0.664825
CA2	1.53069e-14
RUNX1T1	8.19977e-06
CDH17	1.46035e-64
GEM	0.664825
SDC2	2.04427e-24
MATN2	0.000592833
OSR2	0.664825
CTHRC1	0.664825
ANGPT1	6.08972e-16
PKHD1L1	0.664825
SLC30A8	0.942431
TNFRSF11B	1.21025e-06
MAL2	0.643518
NOV	2.29179e-10
ENPP2	0.664825
COL14A1	0.00131001
HAS2	5.15328e-14
FAM83A	0.664825
FBXO32	3.23296e-25
ANXA13	0.664825
SQLE	2.78604e-05
TRIB1	0.0205112
LINC00861	0.664825
MYC	2.58904e-17
SLA	0.950449
NDRG1	5.43111e-34
GPR20	0.664825
PTP4A3	5.44643e-08
PSCA	0.664825
LY6K	0.734177
LYPD2	0.664825
LYNX1	0.734177
LY6D	0.664825
LY6H	0.682062
GPIHBP1	5.7863e-10
DOCK8	3.61151e-06
IL33	0.135225
PLIN2	0.362949
CDKN2A	3.17032e-71
TEK	1.56797e-06
SPINK4	0.00855632
AQP3	4.07187e-08
PRSS3	3.71874e-28
CCL19	0.00025071
CCL21	9.10407e-17
CD72	0.0777019
SIT1	0.664825
ARHGEF39	0.664825
CA9	3.88837e-21
TPM2	8.4616e-19
GLIPR2	0.689732
PAX5	0.00492928
CNTNAP3B	0.664825
PGM5-AS1	0.664825
ALDH1A1	3.49484e-10
FRMD3	0.664825
NTRK2	3.85998e-07
GAS1	0.664984
CTSL	5.63964e-13
C9orf47	0.664825
S1PR3	0.109628
CKS2	3.96905e-30
GADD45G	2.53396e-11
OGN	2.3075e-17
OMD	1.62624e-17
ASPN	9.54757e-09
ECM2	1.16746e-05
FGD3	0.664825
SUSD3	0.664825
FBP1	0.825392
CTSV	1.1544e-10
COL15A1	0.000910838
NR4A3	0.664825
ALDOB	0.00796259
TMEM38B	0.0765632
KLF4	0.074683
CTNNAL1	0.174692
SVEP1	0.664825
SLC31A2	0.781455
RGS3	3.60644e-07
AMBP	1.2915e-06
KIF12	0.696998
AKNA	0.664825
TNC	8.72394e-07
PAPPA	1.55737e-05
CNTRL	2.10714e-10
STOM	1.75226e-05
PTGS1	1.75226e-05
OLFML2A	0.664825
ANGPTL2	0.781455
SH2D3C	0.664825
ENG	0.149673
LCN2	0.241646
CERCAM	0.664825
PTGES	2.05048e-20
ASS1	2.68114e-05
LAMC3	2.32248e-21
AIF1L	0.664825
CEL	1.18955e-07
ADAMTSL2	2.95226e-10
COL5A1	5.70727e-14
FCN1	0.00025071
OLFM1	0.664825
PAEP	1.79293e-21
EGFL7	0.664984
PTGDS	3.26852e-17
CLIC3	0.664825
LRRC26	0.174692
NRARP	0.664825
AKR1C1	0.304811
AKR1C2	0.916456
AKR1C3	0.00326388
CALML5	0.365172
IL2RA	3.87223e-18
PRKCQ-AS1	0.664825
ITIH5	0.664825
GATA3	2.63572e-05
SFTA1P	0.664825
CELF2	0.664825
CCDC3	0.664825
ITGA8	7.04962e-09
MRC1	7.15927e-06
GAD2	0.00794701
APBB1IP	0.0410362
MAP3K8	0.489724
ZEB1	1.14936e-34
CREM	0.0088929
CXCL12	0.000783928
RASSF4	0.664825
ALOX5	2.35675e-20
WDFY4	0.906875
C10orf128	0.664825
DKK1	0.279678
ZWINT	6.27836e-20
BICC1	0.664825
FAM13C	0.664825
CDK1	8.54483e-43
ARID5B	0.664825
RTKN2	0.664825
EGR2	2.05619e-17
SRGN	6.04849e-09
COL13A1	0.664825
PRF1	3.88404e-11
UNC5B	0.664825
UNC5B-AS1	0.664825
SPOCK2	0.664825
PLAU	1.01256e-24
KCNMA1	1.46773e-06
ZCCHC24	0.664825
PLAC9	0.67011
LDB3	0.000343522
MMRN2	0.0833667
SNCG	0.664825
ADIRF	0.67011
ACTA2	1.73057e-18
CH25H	4.69665e-06
LIPA	2.73482e-07
IFIT2	8.94061e-08
IFIT3	8.94061e-08
IFIT1	8.94061e-08
KIF20B	0.000110974
HHEX	0.664825
RBP4	2.2141e-48
PLCE1	2.5223e-16
ENTPD1	4.75625e-11
BLNK	8.57772e-06
SFRP5	0.781518
CRTAC1	0.664825
NKX2-3	0.664825
SCD	0.125683
COL17A1	1.62509e-10
ITPRIP	0.664825
DUSP5	0.748783
ADRA2A	2.94282e-12
RGS10	5.75948e-05
BAG3	5.71743e-23
HTRA1	3.41529e-45
DMBT1	0.00277123
CUZD1	0.664825
ADAM12	1.36268e-18
PTPRE	0.441338
MKI67	8.17984e-41
PRAP1	0.664825
IFITM1	4.37188e-08
CDHR5	0.974371
MUC6	7.58311e-16
MUC5AC	4.51618e-18
MUC5B	1.40034e-08
BRSK2	0.664825
CTSD	1.5449e-62
SYT8	0.664825
LSP1	9.12088e-06
IGF2	3.41927e-21
C11orf21	0.704272
TSPAN32	0.789626
KCNQ1OT1	0.664984
OR51E1	0.664825
HBB	6.28569e-14
RIC3	0.664825
SWAP70	0.664825
ADM	1.99037e-09
LYVE1	1.61363e-16
MRVI1	0.664825
DKK3	3.18261e-06
PDE3B	5.30298e-113
ABCC8	0.0465954
SAA4	9.42717e-05
SAA2	1.72927e-13
SAA1	0.0350538
FIBIN	0.664825
PAX6	4.01266e-37
LMO2	0.664825
EHF	0.664825
PAMR1	0.664825
FJX1	0.664984
C11orf96	0.664825
TSPAN18	0.664825
CHST1	1.62624e-17
SPI1	2.31149e-64
C1QTNF4	0.664825
APLNR	0.0665662
LPXN	0.664825
MPEG1	1.21322e-08
TCN1	2.17618e-06
MS4A6A	5.46889e-10
MS4A4A	0.0833667
MS4A7	0.00214751
MS4A1	0.67011
MS4A8	0.664825
SLC15A3	0.990675
CD6	0.000123458
CD5	1.0931e-41
CYB561A3	0.664825
LRRC10B	0.664825
SCGB2A1	0.664825
WDR74	0.711186
HRASLS2	0.664825
FERMT3	0.000267215
AP003774.1	0.664825
RASGRP2	0.184066
CTSW	0.664825
CST6	0.0680197
CD248	5.08197e-07
TBC1D10C	0.664825
PTPRCAP	0.0327873
ACY3	0.664825
MRGPRF	0.664825
CCND1	9.96376e-69
FGF19	1.54881e-45
ANO1	1.10346e-50
FOLR1	0.664825
FOLR2	0.0889164
STARD10	0.664825
P2RY6	0.664984
ARHGEF17	4.35417e-05
UCP2	0.664825
KCNE3	0.664825
SLCO2B1	6.18073e-11
SERPINH1	1.34012e-50
PRCP	8.22647e-09
PRSS23	0.711186
FZD4	3.14418e-29
CTSC	1.1544e-10
TRPC6	7.78142e-40
BIRC3	0.200557
MMP7	2.60431e-43
MMP10	6.24278e-07
MMP1	1.1055e-06
MMP3	0.604522
PDGFD	4.51618e-18
GUCY1A2	0.889982
RDX	4.80557e-15
C11orf53	0.664825
POU2AF1	1.03225e-05
ALG9	0.664825
CRYAB	1.29406e-17
IL18	4.73338e-22
NCAM1	2.23165e-41
NNMT	1.58649e-20
CADM1	0.898956
APOA1	1.02467e-26
TAGLN	4.6592e-13
FXYD2	0.664825
IL10RA	0.00182193
TMPRSS4	0.664825
SCN4B	0.674876
CD3E	1.76791e-08
CD3D	0.175853
CD3G	0.063077
PHLDB1	0.664825
CXCR5	0.00289091
SLC37A4	0.704272
MCAM	3.15003e-16
THY1	0.0016352
TRIM29	0.00136852
POU2F3	0.0443017
CRTAM	0.0456341
VWA5A	0.664825
NRGN	0.664825
VSIG2	0.664825
ESAM	0.0317345
ROBO4	0.756574
FLI1	0.314115
TMEM45B	0.664825
ADAMTS8	9.94919e-07
ADAMTS15	1.12166e-09
NTM	0.664825
NRIP2	0.664825
KCNA5	0.748783
VWF	0.664984
CD27	0.0913986
LPAR5	7.01843e-33
LAG3	0.0154631
CD4	3.39752e-30
CDCA3	4.36032e-26
C1S	0.088256
C1R	0.664825
RBP5	0.00174905
CD163L1	0.664825
CD163	0.0456341
SLC2A14	0.96642
SLC2A3	0.734177
C3AR1	1.2915e-06
CLEC4A	1.13489e-08
CLEC4E	0.742182
MFAP5	6.36037e-06
KLRG1	4.26321e-22
KLRB1	0.0889164
CLEC2D	0.000952664
CLECL1	0.664825
CD69	0.664825
KLRF1	0.84168
CLEC12A	0.433168
CLEC7A	0.00687813
OLR1	0.000687398
KLRD1	0.00125468
KLRC2	0.101253
KLRC1	5.68491e-12
APOLD1	0.664825
GPRC5A	0.664825
EMP1	0.664825
GUCY2C	0.889982
MGP	0.0171855
ERP27	0.664825
RERG	0.664825
MGST1	0.696998
RERGL	0.664825
IAPP	0.000487004
KCNJ8	2.80521e-14
ABCC9	0.664825
BCAT1	0.664825
LRMP	0.764936
SSPN	0.664825
REP15	0.664825
PTHLH	2.11338e-25
TMTC1	0.664825
NELL2	0.664825
SLC38A1	0.696998
RND1	0.10378
FKBP11	0.664825
TUBA1A	8.2071e-15
AQP5	3.39315e-06
BIN2	0.0017879
ACVRL1	0.152776
NR4A1	6.04849e-09
KRT7	2.16298e-43
KRT86	0.664825
KRT81	0.664825
KRT6B	2.76057e-09
KRT6A	4.13431e-10
KRT5	1.03231e-08
KRT8	4.91049e-31
KRT18	4.70915e-46
IGFBP6	1.92033e-23
ITGB7	6.06793e-32
ITGA5	7.65545e-48
GTSF1	0.664825
NCKAP1L	0.00437558
PPP1R1A	0.664825
TESPA1	0.334485
ITGA7	0.000230632
MMP19	1.18955e-07
IL23A	8.44289e-14
NDUFA4L2	0.664825
ARHGAP9	0.664825
AVIL	0.664825
MSRB3	0.664825
IFNG	0.00075438
CPM	0.540599
LYZ	9.56427e-24
PTPRB	0.0545179
TSPAN8	1.16452e-24
PHLDA1	1.57039e-07
CSRP2	0.682119
NTS	1.27206e-07
DUSP6	0.748783
EPYC	0.664825
LUM	3.30119e-05
DCN	7.15927e-06
SOCS2	0.0254763
MYBPC1	0.00299801
IGF1	0.122044
PAH	3.32249e-11
TXNRD1	0.324446
C12orf75	0.664825
NUAK1	0.664825
TMEM119	0.1965
SELPLG	0.734177
HVCN1	0.664825
SDS	0.664825
TBX3	0.000343522
PLA2G1B	4.82997e-17
OASL	8.94061e-08
WDR66	0.664825
GJB2	2.07365e-14
SHISA2	0.664825
FLT1	0.798211
LINC00426	0.664825
ALOX5AP	2.73994e-08
MEDAG	0.664825
HSPH1	8.34231e-21
POSTN	0.00213593
RGCC	7.60461e-09
TSC22D1	0.664825
LCP1	6.06651e-21
OLFM4	7.57739e-05
PCDH17	0.689732
PCDH20	0.664825
PCDH9	0.664825
KLF5	0.0190946
LMO7	0.664825
KCTD12	2.19012e-31
SCEL	1.37799e-06
EDNRB	0.000995057
CLDN10	0.798541
DOCK9	0.664825
GPR18	0.0143912
GPR183	3.20886e-10
ITGBL1	1.31593e-15
EFNB2	0.056125
TNFSF13B	0.00142011
IRS2	4.10169e-06
COL4A1	2.50799e-15
COL4A2	8.43363e-16
MCF2L	0.664825
F10	9.54757e-09
RPPH1	0.664825
PNP	2.43866e-35
RNASE6	3.65449e-05
RNASE1	0.664825
RNASE2	0.704272
MMP14	2.11608e-06
DHRS2	0.664825
ADCY4	1.79293e-21
GZMH	7.54456e-30
GZMB	0.0665662
NOVA1	0.664825
COCH	0.664825
EGLN3	2.52336e-44
CLEC14A	0.0833667
GNG2	2.17618e-06
NID2	0.449273
PTGDR	0.664825
CDKN3	3.90473e-41
DLGAP5	1.37936e-26
PRKCH	0.0243901
HIF1A-AS2	0.664825
RHOJ	0.857954
HSPA2	3.63521e-11
GPX2	7.18866e-05
LTBP2	0.664825
PGF	2.29017e-27
BATF	9.92742e-37
TGFB3	0.849819
DIO2	0.0111399
GPR65	0.664825
FBLN5	2.54395e-14
LGMN	0.664825
CHGA	5.05913e-78
ASB2	0.664825
IFI27	1.00409e-14
SERPINA6	8.60842e-57
SERPINA1	2.819e-16
SERPINA4	5.84419e-08
SERPINA5	3.30119e-05
TCL1A	0.0129068
BDKRB2	0.0115601
BDKRB1	7.01843e-33
BCL11B	1.59594e-11
DLK1	1.57039e-07
MEG3	0.682119
DIO3	2.94861e-05
AMN	5.0564e-08
TNFAIP2	0.664984
CKB	0.539662
PLD4	0.664825
AHNAK2	0.664825
GPR132	0.664825
JAG2	5.5434e-20
CRIP1	0.889982
NDN	1.62509e-10
APBA2	0.664825
ARHGAP11B	2.76057e-09
SCG5	0.489724
GREM1	0.0171855
RASGRP1	0.0576773
THBS1	1.46035e-64
PHGR1	0.84168
GCHFR	0.664825
RHOV	0.00296242
DLL4	1.93847e-19
NUSAP1	4.96456e-25
ITPKA	0.45645
EHD4	5.63225e-09
PATL2	0.664825
SORD	0.924517
DUOX2	0.0410362
DUOXA2	1.40034e-08
GATM	2.96862e-05
C15orf48	0.304811
FBN1	6.83912e-13
FGF7	9.32009e-29
GLDN	0.664825
SCG3	2.96635e-20
LINC00926	0.664825
AQP9	0.0160251
CCNB2	3.39104e-42
GCNT3	1.58186e-21
C2CD4B	0.664825
CA12	0.664825
SNX22	0.449417
RBPMS2	0.664825
PIF1	0.0184385
RASL12	0.664825
CILP	8.35457e-32
LOXL1	9.54757e-09
ISLR	0.664825
STRA6	1.13572e-06
SEMA7A	1.57039e-07
NEIL1	0.664825
CSPG4	0.657129
PSTPIP1	0.251565
LINGO1	0.0288852
BCL2A1	1.25892e-27
IL16	1.03503e-29
HOMER2	0.664825
NMB	0.158481
NTRK3	0.889982
ISG20	1.00409e-14
ACAN	0.00012993
MFGE8	0.10119
ANPEP	6.21404e-93
PRC1	1.70421e-27
SYNM	0.664825
ALDH1A3	0.136075
HBA2	0.00437558
HBA1	0.00437558
PDIA2	0.906875
MSLN	1.04318e-19
TPSAB1	2.94282e-12
TMEM204	0.664825
NPW	0.664825
SLC9A3R2	7.78142e-40
ZG16B	0.664825
PRSS22	0.664825
C16orf89	0.664825
SOCS1	1.28851e-22
TNFRSF17	6.92083e-12
PLA2G10	0.172241
MYH11	7.78911e-26
TMC5	0.664825
GP2	2.43997e-12
CRYM	0.664825
IGSF6	0.521672
OTOA	0.664825
GGA2	2.23131e-07
PLK1	7.67652e-74
PRKCB	2.89885e-23
APOBR	0.664825
NUPR1	0.664825
CD19	0.664825
LAT	0.000718857
SNX29P2	0.664984
SPN	0.000177814
C16orf54	0.674876
CORO1A	0.186955
ITGAL	4.6592e-13
ITGAM	6.52997e-27
ITGAX	0.849819
SNX20	0.00149284
MMP2	0.00014422
CES1	0.464315
MT1E	0.864366
MT1M	0.864366
MT1A	0.864366
MT1F	0.864366
MT1G	0.864366
MT1H	0.864366
MT1X	0.864366
HERPUD1	0.664825
CCL22	8.17711e-16
CX3CL1	0.674876
CCL17	0.0230911
CDH11	5.34418e-15
CDH5	0.172241
RRAD	0.664825
CES2	0.393872
TPPP3	0.682119
HSD11B2	0.682119
NQO1	9.95554e-05
HP	0.15117
MAF	5.47284e-16
PLCG2	0.664984
HSD17B2	0.906875
CDH13	5.63964e-13
DNAAF1	0.664825
WFDC1	0.664825
COTL1	0.178338
CRISPLD2	0.664825
GINS2	1.0853e-27
C16orf74	0.000160399
IRF8	2.47764e-54
FOXF1	0.789626
SLC7A5	0.070494
SNAI3	0.664825
DPEP1	0.172241
SERPINF1	6.27009e-08
HIC1	0.664825
P2RX5	0.664984
SMTNL2	0.664825
ARRB2	0.0429604
TM4SF5	7.70299e-14
VMO1	0.664825
SCIMP	0.0176937
BCL6B	0.664825
CLEC10A	0.664825
ASGR1	9.09033e-51
ACAP1	0.664825
CD68	0.764936
ATP1B2	0.0393805
KDM6B	1.24199e-14
TMEM88	0.67011
ALOX15B	8.20829e-05
TMEM107	0.734177
AURKB	5.91565e-36
ARHGEF15	0.00120131
PIK3R6	0.0758944
GAS7	0.00296242
PMP22	3.80244e-09
CCDC144A	0.664825
TNFRSF13B	0.00289091
RASD1	0.664825
SNORD3B-1	0.664825
MFAP4	2.04832e-06
MTRNR2L1	0.664825
VTN	2.30695e-20
ADAP2	0.833537
EVI2B	0.00142943
EVI2A	0.158481
CCL2	2.12841e-12
CCL7	2.06433e-15
CCL11	0.924517
CCL8	0.0076468
CCL13	6.18073e-11
SLFN12L	0.664825
CCL5	0.764729
CCL14	0.275567
CCL15	0.604522
CCL23	0.200842
CCL18	8.88492e-26
CCL3	2.69748e-09
CCL4	1.30993e-05
CCL3L1	0.664825
CCL4L2	0.664825
PLXDC1	2.78604e-05
PPP1R1B	0.664825
PNMT	0.664825
GRB7	3.49215e-05
CSF3	2.24289e-08
NR1D1	0.664825
TOP2A	8.00903e-29
TNS4	0.664825
CCR7	0.136075
KRT23	0.664825
KRT13	0.664825
KRT15	0.664825
KRT14	0.000463456
KRT16	4.13431e-10
KRT17	8.25575e-33
JUP	5.3299e-10
CCR10	7.22912e-68
RAMP2	0.62898
AOC3	1.37799e-06
LINC00671	0.734177
ARL4D	0.664825
CD300LG	0.00592303
PPY	0.0297766
GJC1	0.664825
HIGD1B	0.664825
FMNL1	0.00296242
TBX21	0.00136556
SKAP1	2.49777e-10
HOXB-AS1	0.664825
NGFR	9.35465e-28
SGCA	0.664825
COL1A1	2.46529e-77
TMEM100	0.664825
SEPT4	0.00492928
CA4	5.44362e-07
TBX2	5.63225e-09
MRC2	8.04163e-10
LIMD2	0.664825
CD79B	0.0288852
ICAM2	0.0111399
KPNA2	7.59391e-06
SLC16A6	0.664825
ABCA8	0.664825
ABCA6	0.664825
KCNJ16	0.664825
KCNJ2	6.78893e-26
SOX9	1.86014e-41
SSTR2	0.857954
CD300A	1.14194e-07
CD300E	6.61466e-09
RAB37	0.664825
CD300LF	0.577596
CASKIN2	0.664825
CYGB	0.664825
SEC14L1	0.664825
TMC8	0.000380462
TK1	4.92563e-35
BIRC5	6.00461e-47
SOCS3	2.4403e-30
C1QTNF1	0.664825
CD7	0.138473
COLEC12	0.664825
TYMS	4.22632e-31
PTPRM	2.32248e-21
APCDD1	0.664825
LAMA3	1.21989e-21
TTR	0.000123458
SLC14A1	0.664825
PSTPIP2	0.0962673
LIPG	0.00277123
ONECUT2	0.664825
PMAIP1	2.43554e-25
RNF152	0.664825
BCL2	2.01138e-28
SERPINB5	1.08034e-20
SERPINB3	0.00109301
SERPINB7	0.664825
SERPINB2	0.000415662
CDH19	0.664825
CCDC102B	0.664825
NFATC1	0.689732
TRIB3	1.84389e-26
SIRPG	7.04962e-09
SIGLEC1	4.20724e-27
PCNA	1.31124e-41
CHGB	0.0646274
PLCB1	3.82091e-26
LAMP5	0.664825
ISM1	0.0171855
MACROD2	0.664825
PCSK2	0.00171099
RIN2	0.748783
NKX2-2	4.10169e-06
LINC00261	0.664825
THBD	8.47977e-14
CD93	0.637621
CST4	0.0149029
CST1	0.0053468
CST2	0.178338
CST7	9.47327e-19
REM1	0.664825
ID1	9.47327e-19
COX4I2	0.664825
TPX2	6.79614e-16
FOXS1	0.664825
HCK	8.12014e-18
BPIFB1	0.664825
PROCR	4.41679e-09
MYL9	9.70983e-33
SLA2	0.0662099
TGM2	0.51355
MAFB	0.0646274
MYBL2	1.57289e-41
WISP2	0.664825
PI3	6.04849e-09
SLPI	4.6592e-13
SDC4	2.33251e-13
WFDC2	0.393872
UBE2C	5.45973e-05
TNNC2	9.94919e-07
PLTP	9.33215e-07
MMP9	3.93109e-16
PREX1	0.664825
PTGIS	2.08204e-07
SNAI1	5.76915e-35
BCAS4	0.664825
NFATC2	1.82647e-15
BCAS1	0.664825
CBLN4	0.664825
AURKA	3.41529e-45
PCK1	0.63453
ZBP1	0.664825
PMEPA1	0.704272
CTSZ	4.54134e-40
PHACTR3	0.664825
COL9A3	0.0053468
BIRC7	7.59391e-06
SOX18	4.25573e-13
RGS19	0.00125381
MADCAM1	1.04093e-06
GZMM	0.178338
FSTL3	3.12017e-05
CFD	0.0297766
JSRP1	0.664825
GADD45B	2.53396e-11
GNG7	5.0564e-08
S1PR4	0.00012993
MATK	2.01818e-16
EBI3	0.0280763
TMIGD2	0.000933193
MIR7-3HG	0.664825
PTPRS	5.00449e-21
DENND1C	0.664825
CD70	1.88499e-15
C3	0.000110974
INSR	7.34387e-21
RETN	0.773283
FCER2	0.950449
CD320	0.67011
KANK3	0.664825
ANGPTL4	1.62509e-10
MYO1F	0.00232833
MUC16	0.0410362
COL5A3	1.36719e-07
ICAM1	0.175853
S1PR5	0.664825
LDLR	2.29179e-10
CNN1	1.21588e-09
ACP5	2.29017e-27
LYL1	1.23673e-05
ASF1B	1.35424e-32
PTGER1	0.00663071
DNAJB1	2.08009e-46
NOTCH3	6.67278e-07
RASAL3	0.748783
KLF2	6.81637e-10
F2RL3	1.16009e-17
PLVAP	0.96642
FAM129C	0.664825
IL12RB1	1.70576e-31
IFI30	8.66338e-09
PDE4C	6.64824e-19
GDF15	1.21025e-06
LRRC25	0.664825
CRLF1	0.00254537
COMP	3.81726e-23
PLEKHF1	0.664825
CEBPA	0.67011
FXYD3	0.00639141
LGI4	0.664825
FXYD1	0.0393805
LSR	5.75948e-05
HAMP	0.0288852
CD22	6.4252e-18
DMKN	0.727624
HSPB6	3.64081e-17
HCST	0.385109
TYROBP	8.34009e-24
SIPA1L3	0.664825
PPP1R14A	4.82341e-09
C19orf33	0.540599
MAP4K1	0.45645
LGALS7B	0.664825
LGALS4	1.97389e-51
NCCRP1	0.664825
GMFG	0.756574
SUPT5H	0.825392
FCGBP	0.664825
PRX	0.000564529
MIA	1.55737e-05
AXL	0.531781
CEACAM4	0.664825
CEACAM7	0.664825
CEACAM5	8.68186e-39
CEACAM6	6.74851e-06
CD79A	2.52668e-22
POU2F2	0.0662099
CXCL17	0.664825
CEACAM1	2.34461e-05
LYPD3	0.849819
PLAUR	0.547464
BCAM	0.664825
APOE	1.50337e-10
APOC1	3.25099e-09
APOC2	4.82341e-09
FOSB	2.19012e-31
GPR4	0.51355
IGFL2	0.674876
HIF3A	0.566876
PTGIR	0.154582
C5AR1	1.90526e-08
LMTK3	0.664825
RASIP1	0.664825
HRC	0.664825
CD37	0.990675
FLT3LG	0.215079
ADM5	0.833438
IL4I1	4.43417e-07
ATF5	0.0178023
SPIB	0.00579614
CLEC11A	0.67011
KLK1	5.43111e-34
KLK6	4.64827e-06
KLK7	0.00855632
KLK8	0.0983774
KLK10	0.664825
KLK11	0.664825
NKG7	0.646825
SIGLEC10	4.50041e-10
HAS1	0.664825
FPR1	1.27206e-07
FPR2	0.00492928
FPR3	1.72234e-35
ZNF331	0.664825
OSCAR	0.489724
LILRB2	1.06828e-18
LILRA5	0.000179156
LAIR1	0.49651
TTYH1	0.664825
LAIR2	0.664825
LILRB1	0.664825
LILRB4	0.000179156
EPS8L1	2.85232e-13
TNNT1	0.00299801
IL11	0.000171338
UBE2S	0.00125381
EIF1AY	0.664984
CLDN5	0.0410362
IGLL5	7.35293e-06
RGL4	0.664825
VPREB3	0.186955
MMP11	0.674876
DERL3	0.664825
SUSD2	0.664825
GGT5	0.889982
GGT1	0.0327873
MIAT	0.664825
XBP1	9.38309e-14
LIF	5.98976e-14
OSM	5.58752e-06
PIK3IP1	0.664825
TIMP3	0.664825
HMOX1	0.664825
MCM5	1.08036e-33
RASD2	2.39089e-07
APOL1	2.98465e-06
NCF4	0.0576773
IL2RB	0.00105891
RAC2	2.21841e-12
CYTH4	0.15117
LGALS2	0.704272
LGALS1	0.0149029
APOBEC3A	0.664825
APOBEC3C	0.664825
APOBEC3G	3.77908e-14
APOBEC3H	0.664825
PDGFB	1.38926e-21
GRAP2	0.40929
MEI1	0.664825
CENPM	5.86912e-29
RNU12	0.67011
PARVG	0.00825778
FBLN1	6.81887e-05
GTSE1	6.52997e-27
KLHDC7B	0.664825
SHANK3	0.664825
SAMSN1	0.664825
MIR155HG	0.664825
JAM2	4.6592e-13
CYYR1	0.664825
ADAMTS1	1.06242e-10
ADAMTS5	5.84419e-08
MAP3K7CL	0.664825
C21orf62	0.664825
KCNE1	0.362949
RCAN1	0.664825
CLDN14	0.664825
KCNJ15	0.664825
ERG	2.19965e-23
PCP4	0.664825
FAM3B	0.664825
MX2	1.00409e-14
MX1	8.94061e-08
[truncated: 66 more rows]
