# Supplementary material for: SIDISH Identifies High-Risk Disease-Associated Cells and Biomarkers by Integrating Single-Cell Depth and Bulk Breadth
Source: Research Square preprint supplement (doi:10.21203/rs.3.rs-5921999/v1), 2025-03-10
Supplement: Supplementary file 7 [file e663bb14c12c07fc2cc65506.xlsx]

## Sheet: Description
Description:
1. Scissor Cell Labels: Full list of PDAC cells and their associated labels predicted by Scissor for benchmarking purposes. Scissor+ cells were classified as High-Risk cells, while the remaining cells, including Scissor- cells, were labeled as Background cells.
2. DEGAS Cell labels: Full list of PDAC cells and their associated labels predicted byDEGAS for benchmarking purposes. Predicted score > 0.5 were classified as High-Risk cells, while the remaining cells were labeled as Background cells.
3. scAB Cell labels: Full list of PDAC cells and their associated labels predicted by scAB for benchmarking purposes. "scAB+" cells were classified as High-Risk cells, while the cells labelled as "Other cells" were labeled as Background cells.
4. Scissor Differential Genes: All the differentially expressed genes between High-Risk cells and Background cells (Scissor derived) with an adjusted P value < 0.05. The log Fold change was calculated using a two-tailed Wilcoxon rank sum test
5. Scissor Differential Genes: All the differentially expressed genes between High-Risk cells and Background cells (DEGAS derived) with an adjusted P value < 0.05. The log Fold change was calculated using a two-tailed Wilcoxon rank sum test
6. Scissor Differential Genes: All the differentially expressed genes between High-Risk cells and Background cells (scAB derived) with an adjusted P value < 0.05. The log Fold change was calculated using a two-tailed Wilcoxon rank sum test

## Sheet: 1. Scissor Cell Labels
Cell	Label
T1_AAACCTGAGATGTCGG	Background
T1_AAACGGGGTCATGCAT	Background
T1_AAAGATGCATGTTGAC	Background
T1_AAAGATGGTCGAGTTT	Background
T1_AAAGATGGTCTCTCTG	High-Risk
T1_AAAGATGTCTTTACAC	Background
T1_AAAGCAAAGTGTACCT	Background
T1_AAAGCAATCACTTCAT	High-Risk
T1_AAAGTAGAGTCGTACT	Background
T1_AAAGTAGCATTACGAC	Background
T1_AAATGCCAGAAACGCC	High-Risk
T1_AACACGTAGAAGGTGA	Background
T1_AACACGTCAATGACCT	High-Risk
T1_AACACGTGTCATATCG	Background
T1_AACACGTGTGCTGTAT	Background
T1_AACCATGCACAACTGT	Background
T1_AACCATGTCTGATTCT	High-Risk
T1_AACCATGTCTGTCCGT	High-Risk
T1_AACCGCGGTACTCGCG	High-Risk
T1_AACCGCGTCGAATGGG	Background
T1_AACGTTGCAATGGATA	Background
T1_AACGTTGGTACCCAAT	Background
T1_AACTCAGCAGCAGTTT	Background
T1_AACTCAGTCGTACCGG	High-Risk
T1_AACTCCCCACATCTTT	Background
T1_AACTCCCCACGAAAGC	Background
T1_AACTCTTAGGTAAACT	Background
T1_AACTCTTAGTACCGGA	Background
T1_AACTGGTTCTAACGGT	Background
T1_AACTTTCAGGATTCGG	Background
T1_AACTTTCCAAGAAGAG	High-Risk
T1_AACTTTCCACACCGAC	High-Risk
T1_AAGACCTAGGCGCTCT	Background
T1_AAGACCTAGTCATGCT	High-Risk
T1_AAGACCTGTCTGGTCG	Background
T1_AAGACCTTCATGTCCC	Background
T1_AAGCCGCAGCGATATA	Background
T1_AAGCCGCCAGTAAGAT	Background
T1_AAGCCGCGTAGGCATG	Background
T1_AAGGAGCAGAGCTGCA	Background
T1_AAGGAGCAGTGGTAGC	Background
T1_AAGGAGCCAATTCCTT	High-Risk
T1_AAGGAGCTCGTTGCCT	High-Risk
T1_AAGGCAGAGTGGCACA	High-Risk
T1_AAGGCAGTCTCTGTCG	Background
T1_AAGGTTCAGTATTGGA	Background
T1_AAGGTTCCATTCTTAC	Background
T1_AAGGTTCGTGTCAATC	Background
T1_AAGGTTCTCATAAAGG	Background
T1_AAGTCTGAGCAAATCA	Background
T1_AATCCAGTCTCCTATA	Background
T1_AATCGGTCAAGTTAAG	High-Risk
T1_AATCGGTCACAGGCCT	High-Risk
T1_ACACCAAAGAGACTTA	Background
T1_ACACCAACAATCCAAC	Background
T1_ACACCAACATGGGAAC	High-Risk
T1_ACACCAAGTGAAAGAG	High-Risk
T1_ACACCCTCAGACGTAG	Background
T1_ACACCGGAGTGCCATT	High-Risk
T1_ACACCGGTCGCTTAGA	Background
T1_ACACTGAAGCATGGCA	Background
T1_ACACTGAAGTGTCCCG	High-Risk
T1_ACACTGAGTCCTGCTT	High-Risk
T1_ACACTGAGTTCAGACT	Background
T1_ACACTGAGTTCGAATC	High-Risk
T1_ACACTGATCACTTCAT	Background
T1_ACAGCCGCATCGACGC	High-Risk
T1_ACAGCCGTCAAGCCTA	High-Risk
T1_ACAGCTACATTGGTAC	Background
T1_ACATACGAGACTCGGA	Background
T1_ACATACGCACGAAACG	Background
T1_ACATACGCAGGTCGTC	High-Risk
T1_ACATACGCATCAGTCA	Background
T1_ACATACGTCAGCCTAA	High-Risk
T1_ACATCAGGTTAAGATG	High-Risk
T1_ACATGGTAGATGTCGG	High-Risk
T1_ACATGGTAGTAGTGCG	High-Risk
T1_ACATGGTCAGAGTGTG	Background
T1_ACATGGTTCTAACGGT	High-Risk
T1_ACATGGTTCTCGCATC	Background
T1_ACCAGTAAGGCTCATT	Background
T1_ACCAGTAGTGCACCAC	High-Risk
T1_ACCAGTATCACATACG	High-Risk
T1_ACCAGTATCCTACAGA	Background
T1_ACCAGTATCTTGCAAG	High-Risk
T1_ACCCACTGTTATTCTC	High-Risk
T1_ACCCACTTCTGCAGTA	Background
T1_ACCGTAATCATGGTCA	Background
T1_ACCTTTAGTTCACCTC	Background
T1_ACCTTTATCAGTTTGG	High-Risk
T1_ACGAGCCGTCCAACTA	Background
T1_ACGAGGAAGCCACGTC	High-Risk
T1_ACGAGGACACCCTATC	High-Risk
T1_ACGAGGAGTATATCCG	High-Risk
T1_ACGAGGATCAGCTGGC	High-Risk
T1_ACGAGGATCGGAGCAA	High-Risk
T1_ACGATACAGTACGTAA	Background
T1_ACGATGTAGGCTATCT	Background
T1_ACGATGTGTACCGTTA	Background
T1_ACGATGTTCACGAAGG	High-Risk
T1_ACGCAGCGTCTGATTG	High-Risk
T1_ACGCAGCTCAGTTGAC	Background
T1_ACGCCAGGTAGAGTGC	Background
T1_ACGCCAGGTCCGAGTC	High-Risk
T1_ACGCCAGTCTTAGCCC	Background
T1_ACGCCGAGTACATGTC	Background
T1_ACGCCGAGTGCACCAC	Background
T1_ACGCCGATCGGATGTT	Background
T1_ACGGAGAAGCGATAGC	Background
T1_ACGGCCACAGTTAACC	Background
T1_ACGGCCAGTAAAGTCA	Background
T1_ACGGCCAGTCCTGCTT	Background
T1_ACGGCCATCAGCTGGC	Background
T1_ACGGGCTAGACAGACC	Background
T1_ACGGGCTCACTGTCGG	Background
T1_ACGGGCTCATCCGTGG	Background
T1_ACGGGTCCATGCGCAC	Background
T1_ACGGGTCTCGTTACGA	High-Risk
T1_ACGTCAACAGGAATCG	High-Risk
T1_ACGTCAATCAACCAAC	Background
T1_ACTATCTAGAACAATC	Background
T1_ACTATCTAGTGTTTGC	Background
T1_ACTATCTGTCTTTCAT	High-Risk
T1_ACTATCTTCTCTGAGA	High-Risk
T1_ACTATCTTCTTATCTG	Background
T1_ACTGAACTCAAAGTAG	Background
T1_ACTGAACTCCCAACGG	Background
T1_ACTGAGTAGTTCGATC	High-Risk
T1_ACTGATGGTATTCTCT	Background
T1_ACTGCTCAGCGATCCC	Background
T1_ACTGCTCGTATAGGGC	Background
T1_ACTGCTCGTCTGATCA	High-Risk
T1_ACTGTCCAGCGATGAC	Background
T1_ACTGTCCGTCAAACTC	Background
T1_ACTGTCCTCAAACAAG	Background
T1_ACTTACTAGAAGAAGC	Background
T1_ACTTACTAGATCGGGT	Background
T1_ACTTGTTGTCAAAGCG	High-Risk
T1_ACTTGTTTCTTTACGT	High-Risk
T1_AGAATAGAGAGCTGCA	Background
T1_AGAATAGGTCCTGCTT	Background
T1_AGAATAGGTGTGGTTT	Background
T1_AGACGTTAGGCGACAT	Background
T1_AGAGCGAAGCGTCAAG	Background
T1_AGAGCGACAAACCCAT	Background
T1_AGAGCGAGTTCACGGC	High-Risk
T1_AGAGTGGCAATCACAC	Background
T1_AGAGTGGCATCACGTA	High-Risk
T1_AGAGTGGGTAAACGCG	High-Risk
T1_AGATCTGCACGAAAGC	Background
T1_AGATCTGGTACGACCC	High-Risk
T1_AGATCTGGTCCCTACT	High-Risk
T1_AGATTGCCATATACCG	High-Risk
T1_AGATTGCGTAGCTGCC	Background
T1_AGCAGCCCAAGCCGCT	High-Risk
T1_AGCAGCCCACGGACAA	High-Risk
T1_AGCATACCAATGCCAT	Background
T1_AGCATACGTAACGACG	High-Risk
T1_AGCATACTCCTGCTTG	High-Risk
T1_AGCGGTCAGCTTATCG	High-Risk
T1_AGCGGTCCACCAGCAC	Background
T1_AGCGGTCTCCGAAGAG	Background
T1_AGCGTATGTATAGTAG	Background
T1_AGCGTCGTCACTCTTA	Background
T1_AGCTCCTCACAGGCCT	Background
T1_AGCTCCTCACCATCCT	Background
T1_AGCTCCTCACTAAGTC	High-Risk
T1_AGCTCTCCACCATCCT	Background
T1_AGCTCTCTCGGAGGTA	High-Risk
T1_AGCTTGAAGCCCTAAT	High-Risk
T1_AGCTTGACACGGACAA	High-Risk
T1_AGCTTGACAGACGCTC	Background
T1_AGCTTGACAGTTCCCT	Background
T1_AGCTTGATCAATCACG	Background
T1_AGGCCACAGTCCCACG	High-Risk
T1_AGGCCACTCCTTTCTC	Background
T1_AGGCCACTCGGCATCG	High-Risk
T1_AGGGAGTCAAGAGGCT	High-Risk
T1_AGGGAGTGTCATATCG	Background
T1_AGGGAGTTCTCCAGGG	High-Risk
T1_AGGGATGAGCTGCCCA	High-Risk
T1_AGGGATGGTAGAAAGG	High-Risk
T1_AGGGATGTCTCTTATG	High-Risk
T1_AGGTCATAGTCCAGGA	Background
T1_AGGTCATCAGGGATTG	High-Risk
T1_AGGTCATCAGGTTTCA	High-Risk
T1_AGGTCATCATCCGGGT	Background
T1_AGGTCATTCCAGGGCT	Background
T1_AGGTCATTCTTGTATC	Background
T1_AGGTCCGAGATGCCAG	Background
T1_AGGTCCGTCTCCAACC	High-Risk
T1_AGTAGTCCAGTAAGCG	Background
T1_AGTAGTCTCAGTACGT	Background
T1_AGTCTTTAGCCAGTAG	Background
T1_AGTCTTTAGGGAACGG	High-Risk
T1_AGTCTTTCATTACGAC	High-Risk
T1_AGTCTTTGTGACAAAT	Background
T1_AGTGAGGAGACAGGCT	High-Risk
T1_AGTGAGGGTAAGTGTA	High-Risk
T1_AGTGAGGTCCAAACAC	High-Risk
T1_AGTGGGACACAGCCCA	Background
T1_AGTGGGACATCGATTG	High-Risk
T1_AGTGGGAGTTACGACT	High-Risk
T1_AGTGGGATCGCCGTGA	Background
T1_AGTGTCAAGCGACGTA	Background
T1_AGTGTCACATTAACCG	High-Risk
T1_AGTGTCAGTACCAGTT	High-Risk
T1_AGTGTCAGTAGCTCCG	Background
T1_AGTGTCAGTCAATGTC	High-Risk
T1_AGTTGGTGTCTCTCTG	High-Risk
T1_AGTTGGTTCAGCAACT	High-Risk
T1_AGTTGGTTCCTCAATT	Background
T1_ATAACGCCACTCAGGC	High-Risk
T1_ATAACGCCAGACTCGC	Background
T1_ATAACGCGTCAGAGGT	High-Risk
T1_ATAACGCGTGTGAATA	High-Risk
T1_ATAAGAGAGCTGCAAG	High-Risk
T1_ATAAGAGTCGGTCCGA	Background
T1_ATAGACCAGGATGGTC	Background
T1_ATAGACCGTACGAAAT	High-Risk
T1_ATAGACCTCCTTGCCA	High-Risk
T1_ATCACGACAGTCAGCC	High-Risk
T1_ATCACGAGTATGAAAC	Background
T1_ATCATCTAGATATGCA	Background
T1_ATCATCTAGCCACTAT	Background
T1_ATCATCTGTAGCGTCC	Background
T1_ATCATCTTCTCTTGAT	High-Risk
T1_ATCATGGTCAGAAATG	Background
T1_ATCCACCCAGGCAGTA	Background
T1_ATCCGAAAGCTCCTTC	High-Risk
T1_ATCCGAAAGGCAGGTT	High-Risk
T1_ATCCGAACACGTCTCT	High-Risk
T1_ATCGAGTCACAGCCCA	Background
T1_ATCGAGTGTAGAGTGC	High-Risk
T1_ATCGAGTGTATCTGCA	Background
T1_ATCGAGTGTGGGTCAA	Background
T1_ATCTACTAGCTGCGAA	Background
T1_ATCTACTTCACCAGGC	Background
T1_ATCTACTTCGTTGACA	High-Risk
T1_ATCTGCCAGCAGCGTA	Background
T1_ATCTGCCTCCTTTACA	High-Risk
T1_ATGCGATGTAAGTGTA	Background
T1_ATGGGAGCAGATCCAT	High-Risk
T1_ATGTGTGTCTTCATGT	High-Risk
T1_ATTACTCAGAAGCCCA	Background
T1_ATTACTCAGGACGAAA	High-Risk
T1_ATTACTCAGTCATCCA	Background
T1_ATTACTCCATGCATGT	High-Risk
T1_ATTACTCGTGCCTGCA	Background
T1_ATTACTCTCTTAGCCC	Background
T1_ATTATCCCATTTCACT	High-Risk
T1_ATTATCCGTAAAGGAG	High-Risk
T1_ATTATCCGTACCTACA	Background
T1_ATTATCCGTCTGGTCG	High-Risk
T1_ATTATCCTCGTCTGCT	High-Risk
T1_ATTCTACAGCAATATG	Background
T1_ATTCTACCAAGTTCTG	Background
T1_ATTCTACCAATGTAAG	Background
T1_ATTCTACTCCTCATTA	Background
T1_ATTGGACAGTTTGCGT	Background
T1_ATTGGACTCCTAGGGC	Background
T1_ATTGGTGAGTCGATAA	Background
T1_ATTTCTGCATCCTTGC	High-Risk
T1_CAACCAAAGAGGTTAT	Background
T1_CAACCAAAGTGTGGCA	Background
T1_CAACCAACAATGTTGC	High-Risk
T1_CAACCAACAGGGTTAG	Background
T1_CAACCAACATGGATGG	Background
T1_CAACCAATCTCTTATG	High-Risk
T1_CAACCTCAGGATTCGG	Background
T1_CAACCTCCAAGTAGTA	Background
T1_CAACCTCCATACTACG	Background
T1_CAACCTCTCAAGATCC	Background
T1_CAAGAAAAGGGAGTAA	High-Risk
T1_CAAGATCAGCCACGCT	Background
T1_CAAGATCCATGATCCA	Background
T1_CAAGGCCAGCTAGCCC	High-Risk
T1_CAAGGCCCATTACCTT	Background
T1_CAAGGCCGTATTCTCT	Background
T1_CAAGGCCTCTAACCGA	Background
T1_CAAGTTGAGAGCTTCT	Background
T1_CAAGTTGAGTAGCCGA	Background
T1_CAAGTTGCAATAAGCA	High-Risk
T1_CAAGTTGTCAGCGATT	Background
T1_CACAAACAGTGATCGG	High-Risk
T1_CACAAACGTTGCGCAC	Background
T1_CACAAACTCACGCGGT	Background
T1_CACAAACTCTGTTGAG	High-Risk
T1_CACACCTGTCAAACTC	Background
T1_CACACCTTCAGCTTAG	Background
T1_CACACTCAGGCACATG	High-Risk
T1_CACAGGCAGAGAACAG	Background
T1_CACAGGCAGCCTATGT	Background
T1_CACAGGCCACCGTTGG	High-Risk
T1_CACAGGCCAGCTGTGC	Background
T1_CACAGGCGTTAGTGGG	High-Risk
T1_CACAGGCTCGACGGAA	High-Risk
T1_CACAGGCTCTTCTGGC	Background
T1_CACAGTACAGCATGAG	High-Risk
T1_CACAGTAGTGGCAAAC	Background
T1_CACAGTATCAACGCTA	High-Risk
T1_CACAGTATCCGGCACA	Background
T1_CACATAGAGGCAGTCA	Background
T1_CACATAGAGTACATGA	High-Risk
T1_CACATAGCATTGGGCC	High-Risk
T1_CACATAGGTTGTGGCC	High-Risk
T1_CACATAGTCAGGCCCA	Background
T1_CACATTTAGCAGGCTA	High-Risk
T1_CACATTTAGCCACTAT	Background
T1_CACATTTGTAGCGCAA	High-Risk
T1_CACCACTGTTGGAGGT	Background
T1_CACCACTTCCGTCAAA	Background
T1_CACCAGGAGTTGTCGT	High-Risk
T1_CACCAGGCACGCTTTC	Background
T1_CACCAGGTCCGTTGTC	Background
T1_CACCTTGAGAGTACAT	High-Risk
T1_CACCTTGAGTAAGTAC	Background
T1_CACCTTGCACGAGAGT	High-Risk
T1_CACCTTGGTTAGAACA	Background
T1_CACTCCAAGCTCTCGG	Background
T1_CACTCCACAGATGGGT	Background
T1_CACTCCAGTGAGGCTA	Background
T1_CAGAATCAGGTGTTAA	Background
T1_CAGAATCAGTTAGCGG	High-Risk
T1_CAGAATCCACGGCGTT	Background
T1_CAGATCAAGGCGCTCT	High-Risk
T1_CAGATCACAGCCTATA	High-Risk
T1_CAGATCATCGTCCAGG	Background
T1_CAGCAGCGTGGCTCCA	High-Risk
T1_CAGCATAAGCGAGAAA	High-Risk
T1_CAGCATAAGTACCGGA	High-Risk
T1_CAGCATACAGTTAACC	High-Risk
T1_CAGCCGAAGCGGCTTC	High-Risk
T1_CAGCCGATCAACACAC	Background
T1_CAGCCGATCTTGTTTG	High-Risk
T1_CAGCGACAGATGCCAG	High-Risk
T1_CAGCGACGTACTCGCG	High-Risk
T1_CAGCGACTCAATCTCT	Background
T1_CAGCTAACAAGCCATT	High-Risk
T1_CAGCTAACACTTAACG	Background
T1_CAGCTAACAGACGCTC	Background
T1_CAGCTAAGTCTGCGGT	Background
T1_CAGCTAAGTGTGGTTT	High-Risk
T1_CAGCTAATCGTTTGCC	Background
T1_CAGCTAATCTCGTATT	Background
T1_CAGCTAATCTGGAGCC	Background
T1_CAGCTGGCACAGCCCA	Background
T1_CAGCTGGTCATAAAGG	Background
T1_CAGCTGGTCTCATTCA	High-Risk
T1_CAGGTGCCATGGGAAC	Background
T1_CAGGTGCGTTGCGCAC	High-Risk
T1_CAGGTGCTCTCTTATG	Background
T1_CAGTAACCACATCTTT	Background
T1_CAGTCCTTCGCGGATC	Background
T1_CATATGGAGGTTACCT	High-Risk
T1_CATATGGTCAGTTAGC	Background
T1_CATCAAGAGCTGATAA	Background
T1_CATCAAGAGTGTGGCA	Background
T1_CATCAAGGTACGCTGC	High-Risk
T1_CATCAAGGTCCGTGAC	Background
T1_CATCAAGTCCCTTGCA	Background
T1_CATCGAACACAACTGT	Background
T1_CATCGAAGTTGAGTTC	High-Risk
T1_CATCGAATCATAAAGG	Background
T1_CATCGGGTCAACACGT	High-Risk
T1_CATCGGGTCAGCTTAG	High-Risk
T1_CATCGGGTCTGCGACG	High-Risk
T1_CATGCCTAGATATACG	High-Risk
T1_CATGCCTAGCTCCTTC	Background
T1_CATGCCTCACAACTGT	Background
T1_CATGCCTCACCACGTG	Background
T1_CATGCCTCATTATCTC	High-Risk
T1_CATGCCTGTTCGTGAT	Background
T1_CATGGCGCAGGATTGG	High-Risk
T1_CATGGCGCATGGGAAC	Background
T1_CATGGCGGTGCCTGCA	Background
T1_CATGGCGTCGCTTGTC	High-Risk
T1_CATTATCAGGCTAGGT	Background
T1_CATTATCAGGCTCAGA	Background
T1_CATTATCCAGGTTTCA	Background
T1_CATTATCGTCTAGCGC	Background
T1_CATTCGCAGCCAGGAT	Background
T1_CATTCGCCACGTAAGG	Background
T1_CCAATCCGTGCCTTGG	Background
T1_CCAATCCTCAGAGGTG	Background
T1_CCACCTAAGTGTGGCA	Background
T1_CCACGGATCATGCAAC	High-Risk
T1_CCAGCGAGTTGTGGAG	Background
T1_CCAGCGATCAAAGTAG	Background
T1_CCATGTCCACCAGGCT	Background
T1_CCATGTCTCCAATGGT	High-Risk
T1_CCATTCGCAGATAATG	High-Risk
T1_CCATTCGGTTACGTCA	High-Risk
T1_CCCAATCAGCACCGCT	Background
T1_CCCAATCGTGGAAAGA	High-Risk
T1_CCCAATCTCCTTAATC	High-Risk
T1_CCCAGTTTCTCTAGGA	Background
T1_CCCATACCACGAAACG	High-Risk
T1_CCCATACCAGTGGGAT	High-Risk
T1_CCCATACGTTGGTTTG	Background
T1_CCGGTAGAGTTAGGTA	High-Risk
T1_CCGTACTCAACAACCT	High-Risk
T1_CCGTACTCACACGCTG	Background
T1_CCGTACTCAGTGACAG	High-Risk
T1_CCGTACTGTAGAAAGG	Background
T1_CCGTACTGTAGCTTGT	Background
T1_CCGTGGACAAGCGATG	Background
T1_CCGTGGACAGCGTCCA	High-Risk
T1_CCGTGGAGTCTAACGT	High-Risk
T1_CCGTGGATCCTAGTGA	Background
T1_CCGTGGATCTTCATGT	Background
T1_CCGTTCACATGTAGTC	Background
T1_CCGTTCAGTAGCCTAT	Background
T1_CCGTTCATCGTGGACC	High-Risk
T1_CCTAAAGAGCTCCTTC	Background
T1_CCTAAAGCACGGTAAG	High-Risk
T1_CCTAAAGTCAAGATCC	Background
T1_CCTAAAGTCGCCAGCA	Background
T1_CCTACACAGAACAATC	High-Risk
T1_CCTACACGTCTAAACC	High-Risk
T1_CCTACCAAGTGCTGCC	Background
T1_CCTAGCTGTCATCGGC	High-Risk
T1_CCTATTAAGGTTACCT	High-Risk
T1_CCTATTAAGTTACGGG	Background
T1_CCTATTAGTGATGATA	High-Risk
T1_CCTATTATCAGGCCCA	Background
T1_CCTCAGTAGTGGGATC	High-Risk
T1_CCTCAGTCAGTAGAGC	High-Risk
T1_CCTCAGTGTATGAAAC	Background
T1_CCTCTGAAGATCCCAT	Background
T1_CCTCTGAGTGATAAGT	Background
T1_CCTCTGAGTTTGGGCC	High-Risk
T1_CCTTACGAGCGCTCCA	Background
T1_CCTTACGGTGTTGGGA	Background
T1_CCTTACGTCAAGCCTA	Background
T1_CCTTCCCCAGGAACGT	Background
T1_CCTTCCCGTGTGGCTC	Background
T1_CCTTCCCTCACATACG	High-Risk
T1_CCTTCCCTCACGATGT	Background
T1_CCTTCCCTCAGCCTAA	High-Risk
T1_CCTTCCCTCCAAACAC	Background
T1_CCTTCGAAGAAACGAG	High-Risk
T1_CCTTCGATCATCTGCC	Background
T1_CCTTCGATCCGCAAGC	High-Risk
T1_CCTTTCTCATTCTCAT	Background
T1_CGAACATAGATGCCAG	High-Risk
T1_CGAACATAGCGCCTTG	Background
T1_CGAACATAGCTACCTA	Background
T1_CGAATGTGTTGTGGAG	High-Risk
T1_CGACCTTCACAGGCCT	Background
T1_CGACCTTGTTATCCGA	Background
T1_CGACCTTGTTGGTAAA	Background
T1_CGACTTCAGATCCCGC	Background
T1_CGAGAAGTCGCATGGC	High-Risk
T1_CGAGAAGTCGTACCGG	High-Risk
T1_CGAGCACTCCGGCACA	Background
T1_CGAGCCAAGCCCAACC	High-Risk
T1_CGAGCCATCCCAACGG	Background
T1_CGATCGGCATTCTTAC	High-Risk
T1_CGATCGGGTCGGCATC	Background
T1_CGATGGCTCCATGAAC	High-Risk
T1_CGATGTAAGACGCACA	Background
T1_CGATTGAAGGCTAGGT	Background
T1_CGATTGAGTCGCTTTC	Background
T1_CGATTGATCACCACCT	Background
T1_CGCGGTAAGGCTACGA	Background
T1_CGCGGTACAGGTGGAT	Background
T1_CGCGGTAGTACAGCAG	High-Risk
T1_CGCGTTTGTACAGTGG	Background
T1_CGCTATCAGGGAACGG	Background
T1_CGCTATCGTAAGGATT	Background
T1_CGCTTCATCCCTAACC	Background
T1_CGGACACAGCGATCCC	Background
T1_CGGACGTCAGTAACGG	High-Risk
T1_CGGACGTTCTGCTGTC	Background
T1_CGGACTGAGTTGAGTA	High-Risk
T1_CGGACTGTCATGCTCC	Background
T1_CGGACTGTCTTAACCT	Background
T1_CGGAGTCGTAGCTAAA	Background
T1_CGGCTAGCAAGGACAC	Background
T1_CGGCTAGCACAAGCCC	High-Risk
T1_CGGCTAGTCCAAGTAC	Background
T1_CGGCTAGTCCGCAAGC	High-Risk
T1_CGGGTCATCCCAAGTA	High-Risk
T1_CGGGTCATCGCTTAGA	High-Risk
T1_CGGTTAAAGTGTTGAA	Background
T1_CGGTTAACAGACGCCT	High-Risk
T1_CGGTTAACATCGGGTC	Background
T1_CGGTTAAGTTGAGGTG	Background
T1_CGGTTAAGTTTGGCGC	High-Risk
T1_CGTAGCGGTCTAGCGC	Background
T1_CGTAGCGTCAGGCGAA	Background
T1_CGTAGGCTCCTCTAGC	Background
T1_CGTAGGCTCGATCCCT	Background
T1_CGTAGGCTCGCCAAAT	Background
T1_CGTCACTCAAAGCGGT	Background
T1_CGTCACTTCACCAGGC	Background
T1_CGTCCATCAATAGCAA	High-Risk
T1_CGTCCATGTAAACGCG	High-Risk
T1_CGTCCATGTCATGCCG	Background
T1_CGTCCATTCCTGCAGG	Background
T1_CGTCTACAGGATATAC	High-Risk
T1_CGTGAGCTCACTATTC	Background
T1_CGTGTAACATGCAACT	Background
T1_CGTGTAAGTAGCTCCG	High-Risk
T1_CGTGTAATCACATACG	Background
T1_CGTGTAATCTCGCTTG	High-Risk
T1_CGTGTCTGTGCGGTAA	High-Risk
T1_CGTGTCTTCATTGCGA	Background
T1_CGTGTCTTCCCTTGCA	High-Risk
T1_CGTGTCTTCGTGACAT	Background
T1_CGTTAGATCCTATTCA	High-Risk
T1_CGTTCTGAGGAATTAC	High-Risk
T1_CGTTCTGAGGACCACA	Background
T1_CGTTCTGTCCGCATAA	High-Risk
T1_CGTTGGGAGTGCGTGA	Background
T1_CGTTGGGCACATGGGA	High-Risk
T1_CTAACTTAGCACGCCT	Background
T1_CTAACTTAGGGCACTA	Background
T1_CTAACTTGTCACCCAG	Background
T1_CTAACTTGTTAAAGTG	High-Risk
T1_CTAACTTTCCGGCACA	Background
T1_CTAACTTTCTTGGGTA	High-Risk
T1_CTAAGACTCAAACGGG	Background
T1_CTAATGGCACAGATTC	High-Risk
T1_CTACACCCATAGACTC	Background
T1_CTACACCGTTCGTTGA	Background
T1_CTACACCTCGCTTAGA	Background
T1_CTACATTTCATACGGT	Background
T1_CTACATTTCCCATTTA	Background
T1_CTACCCAAGCAGGCTA	High-Risk
T1_CTACCCACATGGTCTA	Background
T1_CTACCCACATTCCTCG	High-Risk
T1_CTACCCATCCTTTCTC	High-Risk
T1_CTACCCATCTGCTGTC	Background
T1_CTACGTCAGACTAGAT	High-Risk
T1_CTACGTCAGCGCCTCA	Background
T1_CTACGTCCATGACGGA	Background
T1_CTACGTCTCACTTACT	Background
T1_CTAGCCTAGCGTTTAC	Background
T1_CTAGCCTGTTCCATGA	Background
T1_CTAGCCTTCAACGGCC	High-Risk
T1_CTAGTGAAGCCACGCT	Background
T1_CTAGTGACAATCTACG	High-Risk
T1_CTAGTGACATAGGATA	Background
T1_CTAGTGATCATCACCC	Background
T1_CTCACACAGGGTATCG	High-Risk
T1_CTCACACCAAACTGTC	Background
T1_CTCACACTCAACACGT	High-Risk
T1_CTCACACTCATTGCCC	Background
T1_CTCAGAAAGAAGAAGC	Background
T1_CTCAGAAAGTGGGATC	High-Risk
T1_CTCAGAATCAGAGACG	Background
T1_CTCATTAAGCGTCAAG	High-Risk
T1_CTCATTACACGTCAGC	Background
T1_CTCATTAGTCTAAACC	High-Risk
T1_CTCATTATCAGTTTGG	Background
T1_CTCCTAGCATGCCTTC	High-Risk
T1_CTCCTAGTCTTAGCCC	Background
T1_CTCGAAAAGAAACCTA	Background
T1_CTCGAAAAGTCAATAG	Background
T1_CTCGAAATCACCATAG	Background
T1_CTCGAGGAGAGTTGGC	Background
T1_CTCGAGGAGCGTTCCG	Background
T1_CTCGAGGAGCTGCAAG	Background
T1_CTCGAGGGTTATTCTC	Background
T1_CTCGGAGAGCGACGTA	Background
T1_CTCGGAGAGCTAAGAT	Background
T1_CTCGGAGGTAGCCTAT	Background
T1_CTCGGGACATGGTCAT	Background
T1_CTCGTACAGTTAACGA	Background
T1_CTCGTACCAACACGCC	High-Risk
T1_CTCGTACGTAATAGCA	Background
T1_CTCGTACGTCAACATC	Background
T1_CTCGTCATCAACTCTT	High-Risk
T1_CTCGTCATCACGACTA	Background
T1_CTCTAATCAAATACAG	Background
T1_CTCTAATCATGGTTGT	Background
T1_CTCTAATGTCTGGAGA	Background
T1_CTCTACGCAATCCAAC	Background
T1_CTCTGGTCATTATCTC	Background
T1_CTCTGGTTCTCGGACG	Background
T1_CTGAAACAGACTGGGT	Background
T1_CTGAAACCACCCTATC	Background
T1_CTGAAGTCACACGCTG	High-Risk
T1_CTGAAGTCATTGGGCC	Background
T1_CTGATAGAGTCGAGTG	High-Risk
T1_CTGATAGGTTGTGGCC	High-Risk
T1_CTGATAGTCAGATAAG	High-Risk
T1_CTGATCCAGTACGACG	Background
T1_CTGATCCCATCGATGT	Background
T1_CTGATCCGTCTAACGT	Background
T1_CTGCCTAAGTAGCCGA	Background
T1_CTGCCTAGTTTGACTG	High-Risk
T1_CTGCGGATCTCTGCTG	Background
T1_CTGCTGTAGTTAACGA	Background
T1_CTGCTGTCACCGCTAG	Background
T1_CTGCTGTGTACTCGCG	Background
T1_CTGCTGTTCACCATAG	Background
T1_CTGCTGTTCGATGAGG	Background
T1_CTGGTCTCAAACGTGG	High-Risk
T1_CTGGTCTCACGTAAGG	Background
T1_CTGGTCTGTTGAGGTG	Background
T1_CTGGTCTTCTTCATGT	High-Risk
T1_CTGTGCTCAAATCCGT	Background
T1_CTGTGCTCACGAAACG	Background
T1_CTGTGCTCATGTCTCC	Background
T1_CTGTGCTGTGTAAGTA	Background
T1_CTGTTTAAGGGTTCCC	Background
T1_CTTAACTGTCTCTCTG	Background
T1_CTTAACTTCAGTCCCT	High-Risk
T1_CTTACCGAGAAACCTA	Background
T1_CTTACCGCAGTAAGAT	Background
T1_CTTACCGCATCACCCT	High-Risk
T1_CTTACCGTCGGTTCGG	Background
T1_CTTACCGTCTGATACG	High-Risk
T1_CTTAGGAAGCTAGTCT	Background
T1_CTTAGGACAAATCCGT	Background
T1_CTTAGGACAGCCTGTG	Background
T1_CTTAGGACATCGGAAG	Background
T1_CTTAGGATCTTGCAAG	High-Risk
T1_CTTCTCTCATATGCTG	Background
T1_CTTCTCTGTTATCACG	High-Risk
T1_CTTGGCTAGAGAGCTC	Background
T1_CTTGGCTTCCCGGATG	High-Risk
T1_CTTTGCGAGCCACCTG	High-Risk
T1_CTTTGCGCAAGGACAC	Background
T1_GAAACTCAGCTGAAAT	Background
T1_GAAACTCAGGCGTACA	High-Risk
T1_GAAACTCAGTCAAGGC	Background
T1_GAAACTCCACCGAAAG	High-Risk
T1_GAAACTCCAGCGTCCA	Background
T1_GAAACTCGTGTATGGG	Background
T1_GAAACTCTCCTCCTAG	Background
T1_GAAACTCTCTATCCCG	Background
T1_GAAACTCTCTTCGGTC	Background
T1_GAACATCTCTTGTATC	High-Risk
T1_GAACCTATCAAACCAC	Background
T1_GAAGCAGGTACTTAGC	Background
T1_GAAGCAGGTTAAGGGC	High-Risk
T1_GAATAAGCAGGCTCAC	Background
T1_GAATAAGGTCGCTTCT	Background
T1_GAATAAGTCTCTAAGG	High-Risk
T1_GAATAAGTCTGCAGTA	Background
T1_GAATGAAGTTACGGAG	High-Risk
T1_GACACGCAGGGAGTAA	Background
T1_GACACGCCATCGGTTA	Background
T1_GACACGCGTACGAAAT	Background
T1_GACACGCTCTAACTCT	Background
T1_GACAGAGCAGTCAGAG	Background
T1_GACAGAGTCAAGCCTA	Background
T1_GACCAATCACGACTCG	Background
T1_GACCAATCAGCTGGCT	Background
T1_GACCAATGTGCAACGA	Background
T1_GACCTGGCACTTCTGC	High-Risk
T1_GACCTGGCATGGTAGG	High-Risk
T1_GACCTGGTCCGTAGTA	High-Risk
T1_GACGCGTAGTCCAGGA	High-Risk
T1_GACGCGTTCTTACCTA	Background
T1_GACGGCTCAGCCTTTC	Background
T1_GACGTGCAGAGCTTCT	Background
T1_GACGTGCAGAGGGCTT	Background
T1_GACGTGCGTGCAGACA	Background
T1_GACGTGCTCTAGAGTC	High-Risk
T1_GACGTTAAGAGCCCAA	High-Risk
T1_GACGTTAAGTCGTACT	Background
T1_GACGTTACAACTGCTA	Background
T1_GACGTTATCGCGTTTC	Background
T1_GACTAACCAGATCTGT	Background
T1_GACTACAAGGCTAGAC	Background
T1_GACTACACAGCTCCGA	Background
T1_GACTACAGTAGCTAAA	Background
T1_GACTGCGAGCCAGAAC	Background
T1_GACTGCGAGCCGTCGT	Background
T1_GACTGCGGTTCGAATC	High-Risk
T1_GACTGCGTCACTATTC	Background
T1_GACTGCGTCCGCGTTT	High-Risk
T1_GACTGCGTCCTTGACC	Background
T1_GAGCAGAGTCTAGCGC	High-Risk
T1_GAGCAGATCGTCCAGG	High-Risk
T1_GAGCAGATCTCCCTGA	Background
T1_GAGCAGATCTTGTACT	Background
T1_GAGGTGAGTAGCGCTC	High-Risk
T1_GAGGTGATCTCTTGAT	Background
T1_GAGTCCGTCAAAGTAG	Background
T1_GATCAGTAGTACATGA	Background
T1_GATCAGTGTATCTGCA	Background
T1_GATCGATCACCTATCC	High-Risk
T1_GATCGATTCTCAAACG	Background
T1_GATCGCGAGCTTTGGT	High-Risk
T1_GATCGCGGTCAGAGGT	Background
T1_GATCGCGGTCGCGAAA	High-Risk
T1_GATCGTAGTGCAACTT	High-Risk
T1_GATCTAGAGCTCCCAG	Background
T1_GATCTAGCATCCGGGT	Background
T1_GATGAAACAGGCAGTA	Background
T1_GATGAAAGTATAATGG	Background
T1_GATGAAAGTGGTCTCG	High-Risk
T1_GATGAGGCAAACAACA	High-Risk
T1_GATGAGGCACCATGTA	Background
T1_GATGCTAAGTACACCT	High-Risk
T1_GATGCTACATGCCTAA	Background
T1_GATGCTAGTCCAGTAT	Background
T1_GATGCTATCGGAGCAA	High-Risk
T1_GATTCAGCATGGTTGT	High-Risk
T1_GATTCAGCATTCTCAT	Background
T1_GATTCAGGTATTCGTG	High-Risk
T1_GCAAACTAGCGTTCCG	Background
T1_GCAATCAAGATCCTGT	High-Risk
T1_GCAATCACACTCAGGC	Background
T1_GCAATCATCAAGATCC	Background
T1_GCACATACAGTCGATT	High-Risk
T1_GCACTCTAGCGTGAAC	Background
T1_GCACTCTCATGGGACA	Background
T1_GCACTCTGTCATGCCG	Background
T1_GCACTCTGTGTGAAAT	Background
T1_GCACTCTTCCGTTGCT	Background
T1_GCACTCTTCGGCTTGG	Background
T1_GCACTCTTCGTTGCCT	Background
T1_GCACTCTTCTTCGGTC	Background
T1_GCAGTTAGTTAAGGGC	Background
T1_GCAGTTATCTCGGACG	High-Risk
T1_GCATACAAGAAGGTTT	Background
T1_GCATACAAGCCACCTG	High-Risk
T1_GCATACAAGGCTAGAC	Background
T1_GCATACACACAGACAG	Background
T1_GCATACATCAGTCCCT	High-Risk
T1_GCATACATCGTGGTCG	Background
T1_GCATGATAGTCGCCGT	High-Risk
T1_GCATGATGTAAGCACG	Background
T1_GCATGATGTGACGCCT	Background
T1_GCATGATTCCCGGATG	Background
T1_GCATGCGAGAGTACCG	High-Risk
T1_GCATGCGGTACCAGTT	Background
T1_GCATGTAAGCTAGTTC	Background
T1_GCCAAATGTCCGTGAC	High-Risk
T1_GCCTCTATCGGACAAG	Background
T1_GCGACCAGTTAGATGA	High-Risk
T1_GCGACCAGTTCACGGC	High-Risk
T1_GCGAGAAAGGCAATTA	Background
T1_GCGAGAACATCAGTCA	Background
T1_GCGCAACTCCAATGGT	Background
T1_GCGCAACTCTATCGCC	High-Risk
T1_GCGCAGTAGAAACCAT	Background
T1_GCGCAGTAGCCCTAAT	Background
T1_GCGCAGTAGCTTATCG	High-Risk
T1_GCGCAGTTCAACCATG	Background
T1_GCGCCAATCAGTTGAC	Background
T1_GCGCCAATCATGTCCC	High-Risk
T1_GCGCCAATCCGCAGTG	Background
T1_GCGCGATAGTGCGTGA	Background
T1_GCGCGATGTCTGCAAT	Background
T1_GCGCGATGTGTAATGA	Background
T1_GCGGGTTAGACGCAAC	Background
T1_GCTCCTACAAAGTCAA	Background
T1_GCTCCTACAAGAAGAG	Background
T1_GCTCCTACAAGGACTG	High-Risk
T1_GCTCTGTAGGACTGGT	Background
T1_GCTGCAGCACAGCCCA	High-Risk
T1_GCTGCAGGTGTTGAGG	Background
T1_GCTGCGACACAGATTC	Background
T1_GCTGCGATCATAGCAC	High-Risk
T1_GCTGCGATCTTTAGTC	High-Risk
T1_GCTGCTTAGGTAAACT	High-Risk
T1_GCTGCTTAGTTGTAGA	High-Risk
T1_GCTGCTTGTACTTGAC	High-Risk
T1_GCTGCTTGTCCGAATT	Background
T1_GCTGCTTGTGTTGGGA	High-Risk
T1_GCTGCTTTCTTCCTTC	Background
T1_GCTGGGTAGCGTGAAC	High-Risk
T1_GCTGGGTAGTTAGGTA	Background
T1_GCTGGGTGTTTAAGCC	High-Risk
T1_GCTGGGTGTTTGACAC	Background
T1_GCTGGGTTCATTTGGG	Background
T1_GCTTCCAAGATGCCAG	Background
T1_GCTTCCAGTAGCTTGT	Background
T1_GCTTCCAGTCAAAGCG	Background
T1_GCTTCCATCATGCATG	High-Risk
T1_GCTTGAATCATAACCG	Background
T1_GGAACTTGTCCAAGTT	Background
T1_GGAACTTGTCTGCGGT	High-Risk
T1_GGACAAGGTCTACCTC	Background
T1_GGACAAGGTTGCTCCT	High-Risk
T1_GGACAAGGTTTCCACC	Background
T1_GGACAGATCTACCAGA	Background
T1_GGACATTTCAAACGGG	Background
T1_GGACGTCCAATCGAAA	High-Risk
T1_GGACGTCCAATGGTCT	Background
T1_GGACGTCCAGTACACT	Background
T1_GGACGTCCAGTTTACG	High-Risk
T1_GGACGTCTCCTAAGTG	Background
T1_GGACGTCTCTGCGGCA	Background
T1_GGAGCAACATAAGACA	High-Risk
T1_GGAGCAATCAACGAAA	High-Risk
T1_GGAGCAATCTACTATC	Background
T1_GGAGCAATCTGACCTC	Background
T1_GGATGTTAGCTCAACT	High-Risk
T1_GGATTACAGCCCGAAA	Background
T1_GGATTACTCCTTTACA	Background
T1_GGCAATTCACTCAGGC	Background
T1_GGCCGATAGTACGATA	Background
T1_GGCGACTAGGAGTACC	High-Risk
T1_GGCGTGTTCGTATCAG	Background
T1_GGCTCGAGTAGCCTCG	Background
T1_GGCTGGTCAAAGTGCG	Background
T1_GGCTGGTGTCTGCAAT	Background
T1_GGGAATGAGACAGAGA	High-Risk
T1_GGGAATGAGTCGAGTG	High-Risk
T1_GGGAATGCATTATCTC	Background
T1_GGGAATGTCTTGGGTA	Background
T1_GGGACCTCACAAGCCC	Background
T1_GGGACCTCACGAAAGC	Background
T1_GGGACCTCATTGAGCT	High-Risk
T1_GGGACCTGTCGCATAT	Background
T1_GGGAGATAGGCGCTCT	Background
T1_GGGCACTCATGGTTGT	High-Risk
T1_GGGCATCAGATCCCAT	Background
T1_GGGCATCCAGGATTGG	Background
T1_GGGCATCTCACATACG	Background
T1_GGGTCTGCACGGACAA	Background
T1_GGGTCTGGTAACGACG	Background
T1_GGGTCTGGTAGATTAG	High-Risk
T1_GGGTCTGTCTGGTGTA	High-Risk
T1_GGTATTGAGGACAGAA	High-Risk
T1_GGTATTGTCGAACGGA	Background
T1_GGTGAAGAGTGTACTC	High-Risk
T1_GGTGAAGCATTCTCAT	High-Risk
T1_GGTGAAGGTTTGTGTG	High-Risk
T1_GGTGTTACAGTTCCCT	Background
T1_GGTGTTAGTTGGTGGA	Background
T1_GGTGTTATCGTTTATC	Background
T1_GTAACGTCACCGAATT	Background
T1_GTAACTGCATGGAATA	High-Risk
T1_GTAACTGGTAGCGTCC	Background
T1_GTAACTGTCCGCATCT	Background
T1_GTAACTGTCTGTCAAG	High-Risk
T1_GTACGTAAGGGATGGG	Background
T1_GTACGTAAGTGGTAAT	Background
T1_GTACGTAGTTGATTGC	Background
T1_GTACGTATCGCTGATA	High-Risk
T1_GTACTCCAGGCTCTTA	Background
T1_GTACTCCGTTCGTTGA	Background
T1_GTACTTTAGACGCACA	Background
T1_GTACTTTGTCTCTCGT	Background
T1_GTACTTTTCTGAGGGA	Background
T1_GTAGTCAGTAATCACC	Background
T1_GTATCTTAGACTGTAA	Background
T1_GTATCTTGTACCGCTG	Background
T1_GTATCTTGTGTTGGGA	Background
T1_GTATCTTTCACCGTAA	Background
T1_GTATTCTCATTAACCG	Background
T1_GTATTCTGTCTCAACA	High-Risk
T1_GTCACAACAATCTGCA	High-Risk
T1_GTCACAACATGGGACA	High-Risk
T1_GTCACAATCCCTTGTG	High-Risk
T1_GTCACGGGTAAATGAC	Background
T1_GTCACGGGTAATAGCA	High-Risk
T1_GTCATTTAGTGGTAGC	Background
T1_GTCATTTTCAACCATG	Background
T1_GTCCTCACAAGGCTCC	High-Risk
T1_GTCCTCACACCAGTTA	High-Risk
T1_GTCCTCAGTAAGTGTA	Background
T1_GTCCTCATCCACGCAG	High-Risk
T1_GTCCTCATCCGCGCAA	High-Risk
T1_GTCGGGTTCCTAGGGC	High-Risk
T1_GTCGTAAAGATACACA	High-Risk
T1_GTCGTAAGTGACGCCT	High-Risk
T1_GTCTCGTAGGGCTTCC	Background
T1_GTCTCGTTCGTGGTCG	Background
T1_GTGAAGGTCGGTGTCG	High-Risk
T1_GTGCAGCCAGATGGCA	Background
T1_GTGCAGCGTTCTGGTA	Background
T1_GTGCATAAGCTGAACG	High-Risk
T1_GTGCATACACGACGAA	High-Risk
T1_GTGCATAGTGGAAAGA	High-Risk
T1_GTGCATATCTGTGCAA	Background
T1_GTGCTTCAGCCCGAAA	High-Risk
T1_GTGCTTCCAAGTAATG	Background
T1_GTGCTTCTCCTTGGTC	Background
T1_GTGGGTCCAGTATAAG	High-Risk
T1_GTGGGTCTCCCACTTG	Background
T1_GTGTGCGAGAAACCGC	Background
T1_GTGTGCGAGGCATTGG	Background
T1_GTGTGCGCAGTCACTA	High-Risk
T1_GTGTGCGGTTCGGCAC	High-Risk
T1_GTGTTAGCAGTATGCT	Background
T1_GTGTTAGCATACCATG	Background
T1_GTGTTAGGTTGACGTT	Background
T1_GTTAAGCCAGTCTTCC	Background
T1_GTTAAGCTCACCTTAT	Background
T1_GTTACAGAGCTAGTTC	High-Risk
T1_GTTACAGCAATGTTGC	High-Risk
T1_GTTACAGTCACAGTAC	Background
T1_GTTCATTAGTGGACGT	Background
T1_GTTCATTGTCGATTGT	High-Risk
T1_GTTCATTTCACCGGGT	High-Risk
T1_GTTCATTTCACCGTAA	Background
T1_GTTCATTTCGTATCAG	Background
T1_GTTCGGGGTCGAATCT	Background
T1_GTTCGGGTCGTTGACA	Background
T1_GTTCGGGTCTATCCCG	Background
T1_GTTCTCGAGTCCGGTC	Background
T1_GTTCTCGGTAGTAGTA	Background
T1_GTTCTCGGTCTAAAGA	Background
T1_GTTCTCGGTTTGGCGC	Background
T1_GTTTCTACATCGATGT	Background
T1_GTTTCTACATGCTAGT	Background
T1_TAAACCGCAACACCTA	High-Risk
T1_TAAACCGCATTGTGCA	Background
T1_TAAACCGGTAAGAGGA	Background
T1_TAAACCGTCGAGAGCA	High-Risk
T1_TAAGAGAAGGTGCTTT	Background
T1_TAAGAGACAACTGCGC	Background
T1_TAAGAGAGTCACCCAG	High-Risk
T1_TAAGAGAGTTCTGTTT	High-Risk
T1_TAAGAGATCTCTGCTG	Background
T1_TAAGCGTAGAGGTACC	High-Risk
T1_TAAGTGCAGCATCATC	High-Risk
T1_TAAGTGCCAGGGCATA	High-Risk
T1_TAAGTGCGTACCGTAT	Background
T1_TACACGAAGCAGATCG	Background
T1_TACACGACAGGTCCAC	Background
T1_TACACGAGTGCCTGGT	High-Risk
T1_TACACGAGTGCGGTAA	High-Risk
T1_TACACGATCGACCAGC	High-Risk
T1_TACAGTGCACGACTCG	High-Risk
T1_TACAGTGCACTGCCAG	Background
T1_TACAGTGTCAGCTCGG	Background
T1_TACAGTGTCGCTAGCG	High-Risk
T1_TACCTATCATGCTAGT	Background
T1_TACCTTAAGCCCAATT	Background
T1_TACCTTACAAGCCATT	Background
T1_TACCTTACAGGACCCT	High-Risk
T1_TACCTTATCAGATAAG	High-Risk
T1_TACCTTATCTATCCTA	High-Risk
T1_TACCTTATCTCGCTTG	High-Risk
T1_TACGGATAGCGTCAAG	Background
T1_TACGGATGTCAGTGGA	High-Risk
T1_TACGGGCCAGCGAACA	Background
T1_TACGGGCGTACTTGAC	High-Risk
T1_TACGGTAAGATACACA	High-Risk
T1_TACTCATTCAGTTGAC	High-Risk
T1_TACTCGCTCCCGACTT	Background
T1_TACTTGTAGGTGCTAG	Background
T1_TACTTGTAGTGAACAT	Background
T1_TACTTGTGTAAAGTCA	High-Risk
T1_TACTTGTGTTTAGCTG	Background
T1_TACTTGTTCAGTCAGT	High-Risk
T1_TAGACCAAGGGTCGAT	Background
T1_TAGACCATCCAAACAC	Background
T1_TAGAGCTTCCTCTAGC	High-Risk
T1_TAGAGCTTCGCATGAT	Background
T1_TAGCCGGCACGGTTTA	Background
T1_TAGCCGGCATCGGTTA	Background
T1_TAGCCGGTCTAGCACA	Background
T1_TAGGCATGTAACGACG	High-Risk
T1_TAGTGGTAGGGAGTAA	Background
T1_TAGTGGTTCAACACCA	High-Risk
T1_TAGTTGGAGGGAACGG	Background
T1_TAGTTGGCAGCCAGAA	Background
T1_TAGTTGGCAGGCGATA	Background
T1_TAGTTGGGTGGCGAAT	Background
T1_TAGTTGGTCGTTGACA	Background
T1_TATCTCACAAGAGGCT	Background
T1_TATCTCACAATAGAGT	Background
T1_TATGCCCAGCCAACAG	Background
T1_TATGCCCCAATCGGTT	Background
T1_TATGCCCCACGACGAA	Background
T1_TATGCCCTCGGCATCG	High-Risk
T1_TATGCCCTCTTATCTG	Background
T1_TATTACCGTGCTTCTC	Background
T1_TCAACGAAGCTAAACA	Background
T1_TCAACGACACCAGGCT	High-Risk
T1_TCAACGATCAACACTG	Background
T1_TCAATCTAGAAAGTGG	High-Risk
T1_TCAATCTAGCTTCGCG	Background
T1_TCAATCTCAAAGGAAG	Background
T1_TCAATCTGTATCGCAT	High-Risk
T1_TCAATCTGTCGACTAT	Background
T1_TCACAAGCAGCTGTGC	High-Risk
T1_TCACGAACACACAGAG	High-Risk
T1_TCACGAATCACAAACC	Background
T1_TCAGATGCAGAGCCAA	High-Risk
T1_TCAGATGTCCTCAACC	Background
T1_TCAGCAACAGTCGATT	High-Risk
T1_TCAGCAAGTAGCAAAT	Background
T1_TCAGCAATCATTATCC	Background
T1_TCAGCTCCAAACCTAC	Background
T1_TCAGCTCGTGATAAAC	Background
T1_TCAGGATCACCAGGTC	High-Risk
T1_TCAGGATGTACTTCTT	Background
T1_TCATTACGTAATCACC	High-Risk
T1_TCATTACGTGACCAAG	Background
T1_TCATTACGTTCTGGTA	High-Risk
T1_TCATTTGTCACAATGC	High-Risk
T1_TCATTTGTCTACTCAT	Background
T1_TCCACACAGGACATTA	Background
T1_TCCACACGTCTTTCAT	Background
T1_TCCACACGTTACGGAG	High-Risk
T1_TCCCGATCAGGGTATG	Background
T1_TCGAGGCTCAGCTTAG	Background
T1_TCGCGAGCAAGCTGGA	Background
T1_TCGCGTTCATGCGCAC	Background
T1_TCGCGTTTCAACACTG	Background
T1_TCGCGTTTCACATAGC	Background
T1_TCGGGACCACTAAGTC	High-Risk
T1_TCGGGACGTTAAGAAC	High-Risk
T1_TCGGTAAAGTACCGGA	Background
T1_TCGGTAACAACGATGG	High-Risk
T1_TCGGTAATCCCTGACT	Background
T1_TCGGTAATCTTGCATT	High-Risk
T1_TCGTACCAGAGTCTGG	Background
T1_TCGTACCAGTTATCGC	Background
T1_TCGTACCTCTAGCACA	Background
T1_TCGTAGACAGCTGGCT	High-Risk
T1_TCGTAGAGTGGGTCAA	Background
T1_TCGTAGAGTTGGTTTG	Background
T1_TCTATTGAGGGATACC	Background
T1_TCTATTGCAGGGAGAG	Background
T1_TCTATTGTCGGTTCGG	High-Risk
T1_TCTATTGTCGTCACGG	Background
T1_TCTATTGTCTACTATC	High-Risk
T1_TCTATTGTCTCAAGTG	High-Risk
T1_TCTCATAAGTTCCACA	Background
T1_TCTCATACAGACAAAT	Background
T1_TCTCATACAGACAAGC	High-Risk
T1_TCTCATACAGTCCTTC	Background
T1_TCTCATACATGTCGAT	Background
T1_TCTCATAGTATCAGTC	Background
T1_TCTCATATCTTACCTA	High-Risk
T1_TCTCTAAAGTCTCCTC	Background
T1_TCTCTAATCCTGCTTG	Background
T1_TCTGAGAAGAAGAAGC	Background
T1_TCTGGAAAGCACACAG	High-Risk
T1_TCTGGAAGTTACTGAC	Background
T1_TCTTCGGAGACCACGA	High-Risk
T1_TCTTCGGCAATGGATA	Background
T1_TCTTTCCTCATACGGT	High-Risk
T1_TCTTTCCTCTTAGCCC	Background
T1_TGAAAGAAGGACAGAA	Background
T1_TGAAAGACACCGTTGG	Background
T1_TGAAAGACACTTAAGC	Background
T1_TGAAAGATCACAAACC	Background
T1_TGACAACAGAATGTGT	Background
T1_TGACGGCAGAATAGGG	Background
T1_TGACGGCTCGGCATCG	Background
T1_TGACTAGGTCTAAAGA	Background
T1_TGACTAGTCCTGCAGG	Background
T1_TGACTTTGTAGTGAAT	Background
T1_TGAGAGGCATGCAACT	Background
T1_TGAGAGGGTCAAAGAT	High-Risk
T1_TGAGAGGTCATCTGTT	Background
T1_TGAGCATTCGGCGGTT	Background
T1_TGAGCCGAGTACGCGA	Background
T1_TGAGCCGCACCGTTGG	Background
T1_TGAGCCGTCCCTCTTT	Background
T1_TGAGGGAAGGCAGTCA	High-Risk
T1_TGATTTCAGCACCGTC	Background
T1_TGATTTCGTTGACGTT	Background
T1_TGCACCTAGACATAAC	Background
T1_TGCACCTGTCGGCACT	High-Risk
T1_TGCCAAAAGGTGCTTT	High-Risk
T1_TGCCAAAAGTGGCACA	High-Risk
T1_TGCCAAACACGAGAGT	Background
T1_TGCCAAATCATCACCC	High-Risk
T1_TGCCAAATCTGCAAGT	High-Risk
T1_TGCCCATTCCTTTCGG	High-Risk
T1_TGCCCTATCTATCGCC	Background
T1_TGCGCAGCAGGATTGG	High-Risk
T1_TGCGCAGGTACTTGAC	Background
T1_TGCGCAGTCACCATAG	Background
T1_TGCGCAGTCTGGAGCC	High-Risk
T1_TGCGGGTCACAGAGGT	High-Risk
T1_TGCGGGTCATCCCACT	High-Risk
T1_TGCGGGTGTACAGACG	Background
T1_TGCGGGTTCCTCTAGC	High-Risk
T1_TGCGTGGTCGTGGTCG	Background
T1_TGCTACCGTACACCGC	High-Risk
T1_TGCTACCTCCAGTATG	High-Risk
T1_TGCTGCTCAACTGGCC	Background
T1_TGCTGCTCATTAGGCT	Background
T1_TGGACGCCAATACGCT	Background
T1_TGGACGCCAATGGAGC	High-Risk
T1_TGGACGCGTCTTGATG	High-Risk
T1_TGGACGCTCCATGCTC	Background
T1_TGGCCAGAGCAACGGT	High-Risk
T1_TGGCCAGTCCACGTTC	Background
T1_TGGCTGGGTACGAAAT	High-Risk
T1_TGGCTGGTCTGTGCAA	Background
T1_TGGGAAGGTTGATTCG	High-Risk
T1_TGGGCGTAGATCACGG	High-Risk
T1_TGGGCGTAGGAGTACC	Background
T1_TGGTTCCCAATGCCAT	Background
T1_TGGTTCCGTCAAACTC	Background
T1_TGGTTCCGTCTCAACA	Background
T1_TGTCCCAAGGCAGTCA	High-Risk
T1_TGTCCCACAAAGCGGT	High-Risk
T1_TGTCCCAGTCTCCACT	High-Risk
T1_TGTGGTAGTAACGACG	Background
T1_TGTGGTAGTTGGTAAA	Background
T1_TGTGGTATCTATCGCC	Background
T1_TGTGTTTCAATAGCAA	Background
T1_TGTGTTTCAGCTCGCA	Background
T1_TGTGTTTTCATTGCGA	Background
T1_TGTTCCGTCAACACTG	High-Risk
T1_TTAACTCAGCTAGTCT	Background
T1_TTAACTCAGGAATTAC	Background
T1_TTAACTCCAGGCTCAC	Background
T1_TTAACTCTCATGTCTT	Background
T1_TTAACTCTCGCGCCAA	Background
T1_TTAGGACAGCGTCTAT	Background
T1_TTAGGACCATGCAATC	High-Risk
T1_TTAGGCAAGAAACGAG	High-Risk
T1_TTAGTTCAGTGTACTC	High-Risk
T1_TTAGTTCGTAGCACGA	High-Risk
T1_TTAGTTCGTCCCGACA	Background
T1_TTAGTTCGTTTGACTG	Background
T1_TTATGCTGTAGCGATG	High-Risk
T1_TTCCCAGAGGAATTAC	Background
T1_TTCCCAGTCCTAGTGA	Background
T1_TTCGAAGAGACAATAC	Background
T1_TTCGAAGCAACTGGCC	High-Risk
T1_TTCGAAGCAATGAAAC	Background
T1_TTCGGTCGTGACTCAT	Background
T1_TTCGGTCGTTATCGGT	High-Risk
T1_TTCTACAGTAGCTCCG	Background
T1_TTCTCAAAGACTGTAA	Background
T1_TTCTCAACATCCGTGG	High-Risk
T1_TTCTCAAGTAGCTGCC	Background
T1_TTCTCAAGTTCCGTCT	Background
T1_TTCTCAATCGCCAAAT	Background
T1_TTCTCAATCGGCCGAT	Background
T1_TTCTCCTAGATGCGAC	Background
T1_TTCTCCTGTAAGAGAG	Background
T1_TTCTCCTGTATGGTTC	High-Risk
T1_TTCTCCTGTCACCCAG	High-Risk
T1_TTCTCCTTCTACTCAT	Background
T1_TTCTTAGAGTGGGATC	Background
T1_TTCTTAGTCAGAGACG	Background
T1_TTGCCGTGTTCCACAA	High-Risk
T1_TTGCCGTGTTCCACGG	Background
T1_TTGCGTCAGCAACGGT	Background
T1_TTGCGTCGTCTTCTCG	High-Risk
T1_TTGCGTCGTTCGGGCT	High-Risk
T1_TTGCGTCTCAGCCTAA	Background
T1_TTGGAACAGGCTATCT	High-Risk
T1_TTGGAACGTAGTACCT	Background
T1_TTGGAACTCATATCGG	Background
T1_TTGGAACTCCCAACGG	Background
T1_TTGGCAAAGTACGCGA	High-Risk
T1_TTGGCAACAGCATGAG	Background
T1_TTGGCAAGTCATCCCT	High-Risk
T1_TTGGCAATCGTAGGTT	Background
T1_TTGTAGGAGTCGAGTG	High-Risk
T1_TTGTAGGAGTGGAGAA	Background
T1_TTGTAGGGTGCAACGA	Background
T1_TTTACTGCATGAAGTA	High-Risk
T1_TTTACTGGTGCCTGGT	High-Risk
T1_TTTACTGGTTGATTCG	Background
T1_TTTACTGTCACTATTC	Background
T1_TTTACTGTCGTGGTCG	Background
T1_TTTATGCTCCAGAAGG	Background
T1_TTTATGCTCTTACCGC	Background
T1_TTTGCGCCAGTCCTTC	Background
T1_TTTGCGCGTGATAAAC	High-Risk
T1_TTTGGTTAGCCACCTG	High-Risk
T1_TTTGGTTCAAATACAG	High-Risk
T1_TTTGGTTGTTTGGCGC	Background
T1_TTTGTCAAGGGTTCCC	High-Risk
T1_TTTGTCATCCTTTCGG	High-Risk
T1_TTTGTCATCTAAGCCA	Background
T2_AAACCTGCACCACGTG	Background
T2_AAACCTGCAGGGTACA	Background
T2_AAACCTGCAGGGTTAG	Background
T2_AAACCTGCATGGGACA	Background
T2_AAACCTGGTCAAGCGA	Background
T2_AAACCTGGTTCGAATC	Background
T2_AAACCTGTCTCATTCA	Background
T2_AAACGGGAGGTGACCA	Background
T2_AAACGGGCAGTCTTCC	Background
T2_AAACGGGGTCCATCCT	Background
T2_AAACGGGTCATTGCCC	Background
T2_AAACGGGTCGGTGTTA	Background
T2_AAACGGGTCTGCTGCT	Background
T2_AAAGATGAGCTGATAA	Background
T2_AAAGATGAGCTTCGCG	High-Risk
T2_AAAGATGGTCGTGGCT	Background
T2_AAAGATGGTGGTAACG	Background
T2_AAAGATGTCACTTATC	Background
T2_AAAGATGTCCTAGTGA	Background
T2_AAAGATGTCTATCCCG	Background
T2_AAAGCAAAGCACACAG	Background
T2_AAAGCAAAGCGATAGC	Background
T2_AAAGCAACAAGGACAC	Background
T2_AAAGCAACACAGGCCT	Background
T2_AAAGCAACACGGTGTC	Background
T2_AAAGCAACAGATGAGC	Background
T2_AAAGCAACAGTGGAGT	Background
T2_AAAGCAAGTTTGTTTC	Background
T2_AAAGCAATCGCAAACT	Background
T2_AAAGCAATCTAGAGTC	Background
T2_AAAGTAGAGCGTGTCC	Background
T2_AAAGTAGCAATCTACG	Background
T2_AAAGTAGGTCAATACC	Background
T2_AAAGTAGGTCAGAGGT	Background
T2_AAATGCCAGACACGAC	Background
T2_AAATGCCAGATGCGAC	Background
T2_AAATGCCAGCACGCCT	Background
T2_AAATGCCAGTGACATA	Background
T2_AAATGCCCAAGCCGCT	Background
T2_AAATGCCCATGCAATC	Background
T2_AAATGCCTCGGTCCGA	Background
T2_AACACGTAGAGTACAT	Background
T2_AACACGTAGTGTTAGA	Background
T2_AACACGTCACAGCCCA	Background
T2_AACACGTTCCTGTAGA	Background
T2_AACACGTTCTCTAAGG	Background
T2_AACACGTTCTTAGAGC	Background
T2_AACCATGAGCTGTCTA	Background
T2_AACCATGAGGTAGCTG	Background
T2_AACCATGCATTTCACT	Background
T2_AACCATGGTAGCCTCG	Background
T2_AACCATGGTCACCCAG	Background
T2_AACCATGGTTGGACCC	Background
T2_AACCATGTCCACGTTC	Background
T2_AACCATGTCCCGACTT	Background
T2_AACCGCGCACGTGAGA	Background
T2_AACCGCGTCAGTTTGG	Background
T2_AACCGCGTCCGCATAA	Background
T2_AACCGCGTCGAGAGCA	Background
T2_AACCGCGTCTGCGTAA	Background
T2_AACGTTGAGACCTAGG	Background
T2_AACGTTGCATCGGAAG	High-Risk
T2_AACGTTGCATGGTCAT	Background
T2_AACGTTGGTCAGAATA	Background
T2_AACGTTGTCGTACCGG	Background
T2_AACGTTGTCTGATTCT	Background
T2_AACTCAGAGAAGAAGC	Background
T2_AACTCAGAGATAGCAT	Background
T2_AACTCAGGTAAACACA	Background
T2_AACTCAGGTCTTGTCC	Background
T2_AACTCAGGTTCCACAA	Background
T2_AACTCAGTCGCCTGAG	Background
T2_AACTCCCAGAGGGATA	Background
T2_AACTCCCGTCATCCCT	Background
T2_AACTCTTCAAGTACCT	Background
T2_AACTCTTCAAGTCTGT	Background
T2_AACTCTTCATTGTGCA	Background
T2_AACTCTTGTATCACCA	Background
T2_AACTCTTTCCTCGCAT	Background
T2_AACTGGTAGAGTACCG	Background
T2_AACTGGTCAAGCCTAT	Background
T2_AACTGGTGTTCGGCAC	Background
T2_AACTGGTTCATAGCAC	Background
T2_AACTGGTTCTTTAGGG	Background
T2_AACTTTCCAAGAGGCT	Background
T2_AACTTTCCACGGTAAG	Background
T2_AACTTTCCAGGGTTAG	Background
T2_AACTTTCTCGGTTCGG	Background
T2_AACTTTCTCTCAAGTG	Background
T2_AAGACCTAGAGAGCTC	Background
T2_AAGACCTAGTAGTGCG	Background
T2_AAGACCTCAACTGCGC	Background
T2_AAGACCTCACATGGGA	Background
T2_AAGACCTCACTTCTGC	Background
T2_AAGACCTCAGCGTTCG	Background
T2_AAGACCTGTTCGCTAA	Background
T2_AAGACCTTCATGTAGC	Background
T2_AAGACCTTCCTAGAAC	Background
T2_AAGCCGCAGCTAGTTC	Background
T2_AAGCCGCCATGACGGA	Background
T2_AAGCCGCGTGTCAATC	Background
T2_AAGCCGCGTTTAGCTG	Background
T2_AAGCCGCTCACCGTAA	Background
T2_AAGCCGCTCTGAAAGA	Background
T2_AAGGAGCAGCCTCGTG	Background
T2_AAGGAGCCATAGTAAG	Background
T2_AAGGAGCGTATTCGTG	Background
T2_AAGGAGCGTCTACCTC	Background
T2_AAGGAGCGTGCGAAAC	Background
T2_AAGGAGCGTTCAGTAC	Background
T2_AAGGAGCTCCTGCTTG	Background
T2_AAGGAGCTCTTAACCT	Background
T2_AAGGCAGCAGGGAGAG	Background
T2_AAGGCAGGTCCGCTGA	Background
T2_AAGGCAGGTTTGTTGG	Background
T2_AAGGCAGTCCCATTTA	Background
T2_AAGGTTCAGATCGATA	Background
T2_AAGGTTCAGCTGAAAT	Background
T2_AAGGTTCAGGCTCAGA	Background
T2_AAGGTTCAGTGGAGTC	Background
T2_AAGGTTCGTGTGACGA	Background
T2_AAGGTTCGTTGCGCAC	Background
T2_AAGGTTCTCGATCCCT	Background
T2_AAGTCTGCAGGTCGTC	Background
T2_AAGTCTGGTAAACGCG	Background
T2_AAGTCTGGTACCATCA	Background
T2_AAGTCTGGTCGGCTCA	Background
T2_AAGTCTGTCGCATGAT	Background
T2_AAGTCTGTCTCAACTT	Background
T2_AATCCAGAGAGACTAT	Background
T2_AATCCAGCAGTAAGAT	Background
T2_AATCCAGGTTAAAGAC	Background
T2_AATCCAGGTTGTGGCC	Background
T2_AATCCAGGTTTGTTTC	Background
T2_AATCGGTAGCCACTAT	Background
T2_AATCGGTAGTTAGCGG	Background
T2_AATCGGTCACTATCTT	Background
T2_AATCGGTGTTAAGTAG	Background
T2_AATCGGTGTTAGATGA	Background
T2_AATCGGTGTTCAGCGC	Background
T2_AATCGGTTCAGAGACG	Background
T2_AATCGGTTCGAGAACG	Background
T2_ACACCAAAGCGACGTA	Background
T2_ACACCAAAGCGATTCT	Background
T2_ACACCAACACGGCCAT	Background
T2_ACACCAAGTAGGCTGA	Background
T2_ACACCAAGTCCAGTAT	Background
T2_ACACCAAGTCGTTGTA	Background
T2_ACACCAATCTGGTATG	Background
T2_ACACCCTAGCTGTCTA	Background
T2_ACACCCTCAACAACCT	Background
T2_ACACCCTCACAAGTAA	Background
T2_ACACCCTGTCGCGTGT	Background
T2_ACACCCTGTGTGTGCC	Background
T2_ACACCCTGTGTTCTTT	Background
T2_ACACCCTTCACCAGGC	Background
T2_ACACCCTTCGAACTGT	Background
T2_ACACCCTTCTCTGTCG	Background
T2_ACACCGGCAAAGGAAG	Background
T2_ACACCGGCAAGGCTCC	Background
T2_ACACCGGCATAAGACA	Background
T2_ACACCGGGTGGTACAG	Background
T2_ACACCGGGTTGGTGGA	Background
T2_ACACTGAAGACCACGA	High-Risk
T2_ACACTGAAGACTGGGT	Background
T2_ACACTGAAGCTATGCT	Background
T2_ACACTGACACTTCTGC	Background
T2_ACACTGAGTCTTTCAT	Background
T2_ACACTGATCCCTTGCA	Background
T2_ACACTGATCCGTAGGC	Background
T2_ACACTGATCCTTTCTC	Background
T2_ACAGCCGAGACTAGGC	Background
T2_ACAGCCGAGAGGTACC	Background
T2_ACAGCCGAGCAGGTCA	Background
T2_ACAGCCGAGGGATCTG	Background
T2_ACAGCCGCACGGCGTT	Background
T2_ACAGCCGCATACTACG	Background
T2_ACAGCCGTCAACGCTA	Background
T2_ACAGCTACACAACTGT	Background
T2_ACAGCTACATTTGCTT	Background
T2_ACAGCTAGTCGTGGCT	Background
T2_ACAGCTAGTTTAGGAA	Background
T2_ACAGCTATCAAGCCTA	Background
T2_ACAGCTATCTCATTCA	Background
T2_ACAGCTATCTTTACGT	Background
T2_ACATACGAGAGCTTCT	Background
T2_ACATACGAGAGGTTGC	Background
T2_ACATACGAGGATGGTC	Background
T2_ACATACGCACAGATTC	Background
T2_ACATACGCAGCTTCGG	Background
T2_ACATACGGTTGACGTT	Background
T2_ACATCAGAGACTTTCG	Background
T2_ACATCAGAGCCACTAT	Background
T2_ACATCAGAGGGTCTCC	Background
T2_ACATCAGGTTCAGTAC	Background
T2_ACATCAGGTTGGTGGA	Background
T2_ACATCAGTCCAAATGC	Background
T2_ACATGGTAGTGCAAGC	Background
T2_ACATGGTCATCACCCT	Background
T2_ACATGGTGTAAACCTC	Background
T2_ACATGGTGTCGAATCT	Background
T2_ACATGGTGTCTGCAAT	Background
T2_ACATGGTGTGCTTCTC	Background
T2_ACATGGTTCAACACAC	Background
T2_ACATGGTTCAGGCCCA	Background
T2_ACCAGTAAGAGCCCAA	Background
T2_ACCAGTAAGTAGCCGA	Background
T2_ACCAGTACAAGCTGAG	Background
T2_ACCAGTACACAGGAGT	Background
T2_ACCAGTAGTCATTAGC	Background
T2_ACCAGTAGTCGTGGCT	Background
T2_ACCAGTAGTTCACGGC	Background
T2_ACCAGTAGTTCATGGT	Background
T2_ACCAGTATCAGCATGT	Background
T2_ACCAGTATCCGTACAA	Background
T2_ACCAGTATCGACCAGC	Background
T2_ACCCACTAGAACTGTA	Background
T2_ACCCACTAGATCCCAT	Background
T2_ACCCACTAGCTCTCGG	Background
T2_ACCCACTCAAAGCAAT	Background
T2_ACCCACTCACATTAGC	Background
T2_ACCCACTCAGACACTT	Background
T2_ACCCACTCAGATAATG	Background
T2_ACCCACTCAGCTGCAC	Background
T2_ACCCACTCATAAGACA	Background
T2_ACCCACTTCGCATGAT	Background
T2_ACCGTAACACCCATGG	Background
T2_ACCGTAACACGTGAGA	Background
T2_ACCGTAAGTGTTCGAT	Background
T2_ACCGTAAGTGTTTGGT	Background
T2_ACCGTAATCAAAGACA	Background
T2_ACCGTAATCAACTCTT	Background
T2_ACCGTAATCGTTTAGG	Background
T2_ACCTTTACAGACGCCT	Background
T2_ACCTTTACAGCTTCGG	Background
T2_ACCTTTATCGCGCCAA	Background
T2_ACGAGCCAGGAGTACC	Background
T2_ACGAGCCAGTACTTGC	Background
T2_ACGAGCCAGTGAATTG	Background
T2_ACGAGCCAGTGTACGG	Background
T2_ACGAGCCCAAGTCTAC	Background
T2_ACGAGCCTCTTAACCT	Background
T2_ACGAGGAAGCTATGCT	Background
T2_ACGAGGAAGTAGCCGA	Background
T2_ACGAGGACACCACCAG	High-Risk
T2_ACGAGGACAGGAATCG	Background
T2_ACGAGGACATTGCGGC	Background
T2_ACGAGGAGTAGAGCTG	Background
T2_ACGATACAGACCGGAT	Background
T2_ACGATACAGAGCTGGT	Background
T2_ACGATACAGATGAGAG	Background
T2_ACGATACGTGAAGGCT	Background
T2_ACGATACTCTCTGTCG	Background
T2_ACGATGTAGCCTATGT	Background
T2_ACGATGTGTCTAGGTT	Background
T2_ACGATGTGTGTATGGG	Background
T2_ACGATGTTCAACACAC	Background
T2_ACGATGTTCTCGCATC	Background
T2_ACGCAGCAGATCCTGT	Background
T2_ACGCAGCAGTGGTCCC	Background
T2_ACGCAGCCAAGCTGAG	Background
T2_ACGCAGCGTAGTACCT	Background
T2_ACGCAGCGTGCGCTTG	Background
T2_ACGCAGCTCCGCATCT	Background
T2_ACGCAGCTCTTGTCAT	Background
T2_ACGCCAGAGGCTCAGA	Background
T2_ACGCCAGGTTTCGCTC	Background
T2_ACGCCAGTCACCGTAA	Background
T2_ACGCCGAAGCTAGCCC	Background
T2_ACGCCGACACAGGAGT	Background
T2_ACGCCGAGTAAATACG	Background
T2_ACGCCGATCAGGCAAG	Background
T2_ACGCCGATCTGATACG	Background
T2_ACGGAGAAGGCACATG	Background
T2_ACGGAGAAGTGAAGAG	Background
T2_ACGGAGAGTAACGCGA	Background
T2_ACGGAGAGTTGCTCCT	Background
T2_ACGGAGATCCTGCCAT	Background
T2_ACGGAGATCTCGCATC	Background
T2_ACGGCCAAGATTACCC	Background
T2_ACGGCCAAGGCCATAG	Background
T2_ACGGCCAAGTACTTGC	Background
T2_ACGGCCAAGTAGGCCA	Background
T2_ACGGCCACACCATGTA	Background
T2_ACGGCCACACGCCAGT	Background
T2_ACGGCCATCGGCGCTA	Background
T2_ACGGGCTAGCTTTGGT	Background
T2_ACGGGCTAGGTGCAAC	Background
T2_ACGGGCTAGTTGAGAT	Background
T2_ACGGGCTCATGTCTCC	Background
T2_ACGGGCTGTACAGTTC	Background
T2_ACGGGCTTCTCAAGTG	Background
T2_ACGGGTCAGCGAGAAA	Background
T2_ACGGGTCCAAGCGTAG	Background
T2_ACGGGTCGTGCTTCTC	Background
T2_ACGGGTCTCCTGCCAT	Background
T2_ACGTCAAAGATCTGCT	Background
T2_ACGTCAAAGGCGCTCT	Background
T2_ACGTCAAAGTTGAGAT	Background
T2_ACGTCAACAGAGTGTG	Background
T2_ACGTCAACAGCTCGCA	Background
T2_ACGTCAAGTCAAAGAT	Background
T2_ACGTCAATCAGCTCGG	Background
T2_ACGTCAATCCGCGCAA	Background
T2_ACGTCAATCGCACTCT	Background
T2_ACGTCAATCGGTGTTA	Background
T2_ACGTCAATCTAAGCCA	Background
T2_ACTATCTAGTTAGGTA	Background
T2_ACTATCTCATAGTAAG	Background
T2_ACTATCTGTCTCCATC	Background
T2_ACTATCTTCAGTTCGA	High-Risk
T2_ACTATCTTCTTGAGGT	Background
T2_ACTGAACAGATCCCGC	Background
T2_ACTGAACAGCAGCGTA	Background
T2_ACTGAACCACTTAACG	Background
T2_ACTGAACTCTGCGGCA	Background
T2_ACTGAACTCTTTAGTC	Background
T2_ACTGAGTAGAGCTGCA	Background
T2_ACTGAGTAGCACAGGT	Background
T2_ACTGAGTAGCAGACTG	Background
T2_ACTGAGTAGTGTACGG	Background
T2_ACTGAGTCACCAGATT	Background
T2_ACTGAGTGTCTTTCAT	Background
T2_ACTGAGTGTGTAATGA	Background
T2_ACTGAGTTCAACACGT	Background
T2_ACTGAGTTCAATCACG	Background
T2_ACTGAGTTCCACTCCA	Background
T2_ACTGAGTTCCTCGCAT	Background
T2_ACTGAGTTCGTGACAT	Background
T2_ACTGATGAGACAATAC	Background
T2_ACTGATGAGAGCTGCA	Background
T2_ACTGATGAGTAGATGT	Background
T2_ACTGATGAGTGTCCAT	Background
T2_ACTGATGAGTGTGAAT	Background
T2_ACTGATGCATAAAGGT	Background
T2_ACTGATGCATGCGCAC	Background
T2_ACTGATGCATGTAGTC	Background
T2_ACTGATGGTCGGCATC	Background
T2_ACTGATGGTTCGTCTC	Background
T2_ACTGATGTCTTGAGAC	Background
T2_ACTGCTCAGCACACAG	Background
T2_ACTGCTCAGCGTCTAT	Background
T2_ACTGCTCAGCTCAACT	Background
T2_ACTGCTCCAGCGTCCA	Background
T2_ACTGCTCTCTGCGGCA	Background
T2_ACTGTCCAGTTTGCGT	Background
T2_ACTGTCCCATGACGGA	Background
T2_ACTGTCCCATGCCTAA	Background
T2_ACTGTCCTCCTCGCAT	Background
T2_ACTGTCCTCTTCGAGA	Background
T2_ACTTACTAGGCTCTTA	Background
T2_ACTTACTCAGCTATTG	Background
T2_ACTTACTTCCATGAAC	Background
T2_ACTTACTTCTGATACG	Background
T2_ACTTGTTAGATGCCTT	Background
T2_ACTTGTTAGGATTCGG	Background
T2_ACTTGTTCAAACTGTC	Background
T2_ACTTGTTCAGCCAATT	Background
T2_ACTTGTTCAGTCTTCC	Background
T2_ACTTGTTGTAGTACCT	Background
T2_ACTTGTTGTATCTGCA	Background
T2_ACTTGTTGTGATGTCT	Background
T2_ACTTGTTTCATGCAAC	Background
T2_ACTTGTTTCGGTGTTA	Background
T2_ACTTTCAAGAGTACCG	Background
T2_ACTTTCAAGTAATCCC	Background
T2_ACTTTCACACGTCAGC	Background
T2_ACTTTCATCAGTTTGG	Background
T2_ACTTTCATCCACTCCA	Background
T2_ACTTTCATCCGTTGCT	Background
T2_AGAATAGAGGGTCTCC	Background
T2_AGAATAGTCAGGTAAA	Background
T2_AGAATAGTCCGGCACA	Background
T2_AGAATAGTCGTTGCCT	Background
T2_AGAATAGTCTCATTCA	Background
T2_AGACGTTAGACTTTCG	Background
T2_AGACGTTGTAAATGTG	Background
T2_AGACGTTTCCGTACAA	Background
T2_AGACGTTTCTTCGGTC	Background
T2_AGAGCGAAGACAAAGG	Background
T2_AGAGCGAAGACGCAAC	Background
T2_AGAGCGAAGGGATGGG	Background
T2_AGAGCGACAGCTGGCT	Background
T2_AGAGCGAGTTCCACTC	Background
T2_AGAGCTTCACGTGAGA	Background
T2_AGAGCTTCATCGGGTC	Background
T2_AGAGCTTGTAAACCTC	Background
T2_AGAGCTTTCCTTCAAT	Background
T2_AGAGCTTTCTTCGAGA	Background
T2_AGAGTGGCACTGCCAG	Background
T2_AGAGTGGCAGATTGCT	Background
T2_AGAGTGGGTCATCGGC	Background
T2_AGAGTGGTCAATAAGG	Background
T2_AGATCTGAGAGATGAG	Background
T2_AGATCTGAGCGCCTTG	Background
T2_AGATCTGAGTACATGA	Background
T2_AGATCTGCATTCACTT	Background
T2_AGATCTGGTAATTGGA	Background
T2_AGATCTGGTATCTGCA	Background
T2_AGATCTGTCGATGAGG	Background
T2_AGATTGCAGGGAACGG	Background
T2_AGATTGCCACTGAAGG	Background
T2_AGATTGCCAGCTGCAC	High-Risk
T2_AGATTGCGTCATACTG	Background
T2_AGCAGCCAGTACGTTC	Background
T2_AGCAGCCGTCCGAAGA	Background
T2_AGCATACAGATCCGAG	Background
T2_AGCATACAGCTGTTCA	Background
T2_AGCATACCAGGCAGTA	Background
T2_AGCATACCATTAACCG	Background
T2_AGCATACGTCGCTTTC	Background
T2_AGCATACGTGCACGAA	Background
T2_AGCATACGTTAGATGA	Background
T2_AGCATACGTTATCACG	Background
T2_AGCATACTCTGGTTCC	Background
T2_AGCCTAAAGCTGAAAT	Background
T2_AGCCTAACACAGCGTC	Background
T2_AGCCTAACAGCCACCA	Background
T2_AGCCTAACAGCTTAAC	Background
T2_AGCCTAAGTACTTCTT	Background
T2_AGCGGTCCACAACGCC	Background
T2_AGCGGTCTCACCCGAG	Background
T2_AGCGGTCTCCGTACAA	Background
T2_AGCGGTCTCCTAGTGA	Background
T2_AGCGGTCTCTCGATGA	Background
T2_AGCGTATAGCTAGTCT	Background
T2_AGCGTATCAAGAGGCT	Background
T2_AGCGTATCATTCCTGC	Background
T2_AGCGTATGTATGAAAC	Background
T2_AGCGTATGTCGTCTTC	Background
T2_AGCGTATGTCTAGCGC	Background
T2_AGCGTCGAGATGAGAG	High-Risk
T2_AGCGTCGAGCCAGAAC	Background
T2_AGCGTCGAGTGAACGC	Background
T2_AGCGTCGTCACGAAGG	Background
T2_AGCGTCGTCCAGGGCT	Background
T2_AGCGTCGTCTACTATC	Background
T2_AGCTCCTAGAGTTGGC	Background
T2_AGCTCCTGTTATGCGT	Background
T2_AGCTCCTGTTGCTCCT	Background
T2_AGCTCCTGTTGGTGGA	Background
T2_AGCTCCTTCTGACCTC	Background
T2_AGCTCTCAGCCAGTAG	Background
T2_AGCTCTCAGGGTGTGT	Background
T2_AGCTCTCGTAAGGATT	Background
T2_AGCTCTCGTCTCATCC	Background
T2_AGCTCTCTCACTTACT	Background
T2_AGCTCTCTCCACGAAT	Background
T2_AGCTCTCTCTGCTGCT	Background
T2_AGCTTGAAGGCAATTA	Background
T2_AGCTTGACAATACGCT	Background
T2_AGCTTGACATGAAGTA	Background
T2_AGCTTGAGTGGAAAGA	Background
T2_AGCTTGATCCGAGCCA	Background
T2_AGGCCACAGCCGGTAA	Background
T2_AGGCCACAGTAATCCC	Background
T2_AGGCCACCACGGTTTA	Background
T2_AGGCCACCACTCTGTC	Background
T2_AGGCCACGTAAGGGAA	Background
T2_AGGCCACGTCCGTTAA	Background
T2_AGGCCACTCATCTGTT	Background
T2_AGGCCACTCGTAGGAG	Background
T2_AGGCCGTTCGGACAAG	Background
T2_AGGCCGTTCTCGCTTG	Background
T2_AGGGAGTAGGCTCAGA	Background
T2_AGGGAGTAGTCCGGTC	Background
T2_AGGGAGTGTGGCCCTA	Background
T2_AGGGAGTTCTATCCTA	Background
T2_AGGGAGTTCTCGGACG	Background
T2_AGGGATGCAAGCTGTT	Background
T2_AGGGATGCAGTATCTG	Background
T2_AGGGATGGTACAGACG	Background
T2_AGGGATGGTAGCCTCG	Background
T2_AGGGATGGTCATTAGC	Background
T2_AGGGATGTCCAAATGC	Background
T2_AGGGTGAAGCTACCGC	Background
T2_AGGGTGACACCCTATC	Background
T2_AGGGTGACACTCTGTC	Background
T2_AGGGTGACATCTATGG	Background
T2_AGGGTGAGTCTAGCCG	Background
T2_AGGGTGAGTCTAGCGC	Background
T2_AGGGTGATCCAGTATG	Background
T2_AGGTCATAGAATTCCC	Background
T2_AGGTCATCACCGATAT	Background
T2_AGGTCATCAGTTTACG	Background
T2_AGGTCATGTACCCAAT	Background
T2_AGGTCATGTCCTCCAT	Background
T2_AGGTCATGTGTTTGTG	Background
T2_AGGTCATTCCTTGGTC	Background
T2_AGGTCATTCTTGAGAC	Background
T2_AGGTCATTCTTTACGT	Background
T2_AGGTCCGAGCATGGCA	Background
T2_AGGTCCGAGTGGGATC	Background
T2_AGGTCCGCAAGAAGAG	Background
T2_AGGTCCGCAGCGATCC	Background
T2_AGGTCCGCAGGTTTCA	Background
T2_AGGTCCGGTCGGCATC	Background
T2_AGGTCCGGTGCAACGA	Background
T2_AGGTCCGGTGCTGTAT	Background
T2_AGGTCCGGTTGAACTC	Background
T2_AGGTCCGTCACTCTTA	Background
T2_AGTAGTCAGGCAGGTT	Background
T2_AGTAGTCGTCTACCTC	Background
T2_AGTAGTCTCAAACCAC	Background
T2_AGTAGTCTCTATCCCG	Background
T2_AGTAGTCTCTCGCTTG	Background
T2_AGTCTTTCACCTCGGA	Background
T2_AGTCTTTCAGTTCCCT	Background
T2_AGTCTTTTCTCTGAGA	Background
T2_AGTGAGGAGGGTGTGT	Background
T2_AGTGAGGAGGTGTTAA	Background
T2_AGTGAGGCACCACGTG	Background
T2_AGTGAGGGTATAGGTA	Background
T2_AGTGAGGGTTATCACG	Background
T2_AGTGAGGTCGAATCCA	Background
T2_AGTGGGAAGAGTGAGA	Background
T2_AGTGGGAAGCAACGGT	Background
T2_AGTGGGAAGCAGCGTA	Background
T2_AGTGGGAAGGCAAAGA	Background
T2_AGTGGGACACAACGTT	Background
T2_AGTGGGACACGAAAGC	Background
T2_AGTGGGACACGGCGTT	Background
T2_AGTGGGACAGAGCCAA	Background
T2_AGTGGGACAGCTATTG	Background
T2_AGTGGGATCCTCCTAG	Background
T2_AGTGTCAAGGAATCGC	Background
T2_AGTGTCAAGGACGAAA	Background
T2_AGTGTCAGTGATGTCT	Background
T2_AGTGTCATCCAGAGGA	Background
T2_AGTGTCATCGAGCCCA	Background
T2_AGTTGGTAGAAGATTC	Background
T2_AGTTGGTCACAAGACG	Background
T2_AGTTGGTCATCCTTGC	Background
T2_AGTTGGTGTCCCGACA	Background
T2_AGTTGGTGTGCCTTGG	Background
T2_AGTTGGTTCGGAATCT	Background
T2_AGTTGGTTCGGACAAG	Background
T2_AGTTGGTTCTATCCCG	Background
T2_ATAACGCAGAATGTGT	Background
T2_ATAACGCAGCGTAGTG	Background
T2_ATAACGCAGCTCAACT	Background
T2_ATAACGCGTAGCAAAT	Background
T2_ATAACGCTCGCAAGCC	Background
T2_ATAAGAGAGTTGTCGT	High-Risk
T2_ATAAGAGCATCTATGG	Background
T2_ATAAGAGGTCCAGTTA	Background
T2_ATAAGAGGTCCGTTAA	Background
T2_ATAAGAGGTGAAATCA	Background
T2_ATAGACCAGCCACTAT	Background
T2_ATAGACCAGGGCTTCC	Background
T2_ATAGACCTCAACGAAA	Background
T2_ATCACGAAGAAGGGTA	Background
T2_ATCACGACAGCGAACA	Background
T2_ATCACGACAGGCGATA	Background
T2_ATCACGAGTGCAGTAG	Background
T2_ATCACGAGTTCAGTAC	Background
T2_ATCACGAGTTCATGGT	Background
T2_ATCACGATCTACCAGA	Background
T2_ATCACGATCTTGTACT	Background
T2_ATCATCTAGTACCGGA	Background
T2_ATCATCTAGTAGCCGA	Background
T2_ATCATCTCACTTAACG	Background
T2_ATCATCTGTCACCTAA	Background
T2_ATCATCTTCTTCGAGA	Background
T2_ATCATGGAGACAGGCT	Background
T2_ATCATGGAGTGGACGT	Background
T2_ATCATGGCACGAAAGC	Background
T2_ATCATGGGTCATGCCG	Background
T2_ATCATGGTCACTGGGC	Background
T2_ATCATGGTCTCTGCTG	Background
T2_ATCCACCGTCCCTTGT	Background
T2_ATCCACCGTCGCCATG	Background
T2_ATCCACCTCTTGACGA	Background
T2_ATCCGAAAGGCTCATT	Background
T2_ATCCGAACATGTCTCC	Background
T2_ATCCGAAGTTGGTAAA	Background
T2_ATCCGAATCACAAACC	Background
T2_ATCCGAATCATTTGGG	Background
T2_ATCCGAATCGCAGGCT	Background
T2_ATCGAGTAGAACAATC	Background
T2_ATCGAGTGTGGCGAAT	Background
T2_ATCGAGTTCAGTTAGC	Background
T2_ATCGAGTTCGCTGATA	Background
T2_ATCTACTAGAATCTCC	Background
T2_ATCTACTAGACAGACC	Background
T2_ATCTACTAGGTGCACA	Background
T2_ATCTACTCACGTCTCT	Background
T2_ATCTACTCACGTGAGA	Background
T2_ATCTACTCAGCAGTTT	Background
T2_ATCTACTTCGTTTGCC	Background
T2_ATCTACTTCTTGCATT	Background
T2_ATCTGCCAGGACAGCT	Background
T2_ATCTGCCAGGCGATAC	Background
T2_ATCTGCCAGGTGCTAG	Background
T2_ATCTGCCAGTATCGAA	Background
T2_ATCTGCCAGTCAATAG	Background
T2_ATCTGCCTCCACGCAG	Background
T2_ATCTGCCTCGACGGAA	Background
T2_ATGAGGGCACTATCTT	Background
T2_ATGAGGGCATAGTAAG	Background
T2_ATGAGGGTCTGTACGA	Background
T2_ATGAGGGTCTTCTGGC	Background
T2_ATGCGATAGGATATAC	Background
T2_ATGCGATGTACCGAGA	High-Risk
T2_ATGCGATGTCCTCCAT	Background
T2_ATGCGATGTCTTCTCG	Background
T2_ATGCGATGTGTGCCTG	Background
T2_ATGCGATGTTACGTCA	Background
T2_ATGCGATTCGGATGTT	Background
T2_ATGGGAGAGGACGAAA	Background
T2_ATGGGAGCATCACGAT	Background
T2_ATGGGAGGTCTCTTAT	Background
T2_ATGGGAGTCCCAACGG	Background
T2_ATGTGTGCACAAGCCC	Background
T2_ATGTGTGCAGCCACCA	Background
T2_ATGTGTGGTAAGTGTA	Background
T2_ATGTGTGGTTATGTGC	Background
T2_ATGTGTGTCCCTCAGT	Background
T2_ATTACTCAGGCAAAGA	Background
T2_ATTACTCCAACACGCC	Background
T2_ATTACTCCACGTGAGA	Background
T2_ATTACTCGTATAGGGC	Background
T2_ATTACTCGTCTCATCC	Background
T2_ATTACTCTCAACCAAC	Background
T2_ATTACTCTCGCTAGCG	Background
T2_ATTATCCAGATCGATA	Background
T2_ATTATCCCAGATAATG	Background
T2_ATTATCCCATGCATGT	Background
T2_ATTATCCGTAAGGGCT	Background
T2_ATTATCCGTATCACCA	Background
T2_ATTATCCGTCTGCAAT	Background
T2_ATTATCCGTTGGGACA	Background
T2_ATTATCCTCTTAACCT	Background
T2_ATTCTACAGCTTATCG	Background
T2_ATTCTACAGGCCCTCA	Background
T2_ATTCTACAGTAATCCC	Background
T2_ATTCTACTCAATCTCT	Background
T2_ATTCTACTCCCAACGG	Background
T2_ATTCTACTCCTATGTT	Background
T2_ATTGGACAGGCCCTTG	Background
T2_ATTGGACCAAGGTTTC	Background
T2_ATTGGACCATTCTTAC	Background
T2_ATTGGTGCAGACAGGT	Background
T2_ATTGGTGCATGCTAGT	Background
T2_ATTTCTGAGACAGACC	Background
T2_ATTTCTGCATCCGGGT	High-Risk
T2_ATTTCTGGTGTGGCTC	Background
T2_ATTTCTGTCACAGGCC	Background
T2_ATTTCTGTCGAATGGG	Background
T2_ATTTCTGTCGCCTGTT	Background
T2_CAACCAAAGATGCCAG	Background
T2_CAACCAACATCCTTGC	Background
T2_CAACCAAGTCTAGCGC	Background
T2_CAACCAAGTTGAACTC	Background
T2_CAACCAATCAACACCA	Background
T2_CAACCAATCCGCAGTG	Background
T2_CAACCTCAGCACCGTC	Background
T2_CAACCTCAGGTACTCT	Background
T2_CAACCTCAGTCCTCCT	High-Risk
T2_CAACCTCAGTCGTTTG	Background
T2_CAACCTCCAATGCCAT	High-Risk
T2_CAACCTCGTTATTCTC	Background
T2_CAACTAGAGACGACGT	Background
T2_CAACTAGCAAAGGCGT	Background
T2_CAACTAGCAAGTTGTC	Background
T2_CAACTAGCAGACAAGC	Background
T2_CAACTAGCAGAGTGTG	Background
T2_CAACTAGCATACCATG	Background
T2_CAACTAGCATTACGAC	Background
T2_CAACTAGTCAGTCCCT	Background
T2_CAAGAAAAGGAATGGA	Background
T2_CAAGAAAAGGGATCTG	Background
T2_CAAGAAAAGTATTGGA	Background
T2_CAAGAAACAGTATGCT	Background
T2_CAAGAAAGTACTCGCG	Background
T2_CAAGATCAGCTCCTTC	Background
T2_CAAGATCGTTGCTCCT	Background
T2_CAAGATCTCCAAGCCG	Background
T2_CAAGATCTCCGGCACA	Background
T2_CAAGGCCAGATCGGGT	Background
T2_CAAGGCCAGTTGTCGT	Background
T2_CAAGGCCTCGGCTACG	Background
T2_CAAGTTGAGACGCACA	Background
T2_CAAGTTGCAAGCCTAT	Background
T2_CAAGTTGCATAGACTC	Background
T2_CAAGTTGGTACCAGTT	Background
T2_CAAGTTGTCCAGAAGG	Background
T2_CACAAACAGACCGGAT	Background
T2_CACAAACCAAGCGTAG	Background
T2_CACAAACTCAATCACG	Background
T2_CACAAACTCAGCAACT	Background
T2_CACACAACAGTAAGAT	Background
T2_CACACAAGTCACAAGG	Background
T2_CACACAAGTCCAGTTA	Background
T2_CACACAATCAGTGTTG	Background
T2_CACACAATCATCGATG	Background
T2_CACACAATCGAATCCA	Background
T2_CACACCTAGACAATAC	Background
T2_CACACCTCAGCCACCA	Background
T2_CACACCTTCAACGCTA	Background
T2_CACACCTTCTGATTCT	Background
T2_CACACTCAGCCACGTC	Background
T2_CACACTCAGCGATCCC	Background
T2_CACACTCCAGTATGCT	Background
T2_CACACTCCATGGGACA	Background
T2_CACACTCCATGTAAGA	Background
T2_CACACTCGTATGAATG	Background
T2_CACACTCGTTCTGAAC	Background
T2_CACACTCTCACCACCT	High-Risk
T2_CACACTCTCGCGCCAA	Background
T2_CACACTCTCGTACCGG	Background
T2_CACACTCTCTCGCTTG	Background
T2_CACACTCTCTTATCTG	Background
T2_CACAGGCGTTGGAGGT	Background
T2_CACAGGCTCCAAGTAC	Background
T2_CACAGGCTCCCAGGTG	Background
T2_CACAGGCTCCTCTAGC	Background
T2_CACAGTAAGTTTCCTT	Background
T2_CACAGTACATGCCACG	Background
T2_CACAGTAGTACTTGAC	Background
T2_CACATAGAGAAACCAT	Background
T2_CACATAGAGCAGACTG	Background
T2_CACATAGCAAGTTGTC	Background
T2_CACATAGCACTACAGT	Background
T2_CACATAGCAGTCAGAG	Background
T2_CACATAGGTCAACTGT	Background
T2_CACATAGGTCTGCAAT	Background
T2_CACATAGTCAACCAAC	Background
T2_CACATAGTCAATAAGG	Background
T2_CACATAGTCTGATTCT	Background
T2_CACATTTAGAGTAAGG	Background
T2_CACATTTAGCCGTCGT	Background
T2_CACATTTCAAACGTGG	Background
T2_CACATTTCACCACCAG	Background
T2_CACATTTCACCGATAT	Background
T2_CACATTTCACGCGAAA	Background
T2_CACATTTCATCGGACC	Background
T2_CACATTTTCTACGAGT	Background
T2_CACATTTTCTGACCTC	Background
T2_CACCACTAGGATCGCA	Background
T2_CACCACTAGTCAATAG	Background
T2_CACCACTAGTCCATAC	Background
T2_CACCACTCAGTCGTGC	Background
T2_CACCACTCATAGGATA	Background
T2_CACCACTCATCGGACC	Background
T2_CACCACTCATGACGGA	Background
T2_CACCACTGTCCAACTA	Background
T2_CACCACTGTTTAGGAA	Background
T2_CACCAGGCACGGTTTA	Background
T2_CACCAGGCATCTATGG	Background
T2_CACCAGGCATCTCCCA	Background
T2_CACCAGGGTCGACTGC	Background
T2_CACCAGGTCTCAAACG	Background
T2_CACCTTGAGTGTTAGA	Background
T2_CACCTTGCACAAGCCC	Background
T2_CACCTTGCATCACCCT	Background
T2_CACCTTGGTAAACCTC	Background
T2_CACCTTGTCACGACTA	Background
T2_CACCTTGTCCCATTTA	Background
T2_CACCTTGTCGATGAGG	Background
T2_CACTCCACAACAACCT	Background
T2_CACTCCACAGGAATCG	Background
T2_CACTCCACAGTCAGCC	Background
T2_CACTCCAGTAGCCTAT	Background
T2_CACTCCAGTCCTGCTT	Background
T2_CACTCCAGTGTAAGTA	Background
T2_CAGAATCAGTCTCAAC	Background
T2_CAGAATCAGTGCCAGA	Background
T2_CAGAGAGAGACTGGGT	Background
T2_CAGAGAGCAACCGCCA	Background
T2_CAGAGAGCAGACACTT	Background
T2_CAGAGAGCAGACGCTC	Background
T2_CAGAGAGTCATTCACT	Background
T2_CAGATCAAGAATAGGG	Background
T2_CAGATCAAGATCCGAG	Background
T2_CAGATCAAGATCTGAA	Background
T2_CAGATCACATTCCTGC	Background
T2_CAGATCAGTCCATGAT	Background
T2_CAGATCAGTCGACTGC	Background
T2_CAGCAGCAGCCCTAAT	Background
T2_CAGCAGCCACGAAATA	Background
T2_CAGCAGCTCCTCTAGC	Background
T2_CAGCAGCTCTCGCTTG	Background
T2_CAGCATAAGATCCTGT	Background
T2_CAGCATAAGCCTCGTG	Background
T2_CAGCATAGTGAAATCA	Background
T2_CAGCCGAAGAGTCGGT	Background
T2_CAGCCGACAGCTCCGA	Background
T2_CAGCCGACATATACCG	Background
T2_CAGCCGATCGTAGGAG	Background
T2_CAGCCGATCTCAACTT	Background
T2_CAGCGACAGCTGGAAC	Background
T2_CAGCGACTCCATGCTC	Background
T2_CAGCGACTCGTCTGAA	Background
T2_CAGCTAAAGTTACGGG	Background
T2_CAGCTAAAGTTTAGGA	Background
T2_CAGCTAACAAGTAATG	Background
T2_CAGCTAACACCAGGCT	Background
T2_CAGCTAACACGTTGGC	Background
T2_CAGCTAACAGCGTAAG	Background
T2_CAGCTAATCAACACAC	Background
T2_CAGCTAATCCAGAAGG	Background
T2_CAGCTAATCGCAGGCT	Background
T2_CAGCTAATCTTGTACT	Background
T2_CAGCTGGCATATGGTC	Background
T2_CAGCTGGGTTCACGGC	Background
T2_CAGCTGGTCCAAAGTC	Background
T2_CAGCTGGTCTGCAAGT	Background
T2_CAGGTGCAGCTAGTCT	Background
T2_CAGGTGCAGGAGCGAG	Background
T2_CAGGTGCAGTTCCACA	Background
T2_CAGGTGCCACATAACC	Background
T2_CAGGTGCCACATTAGC	Background
T2_CAGGTGCCACCGGAAA	Background
T2_CAGGTGCCACGTCTCT	Background
T2_CAGGTGCTCGAATGCT	Background
T2_CAGTAACAGTGCGTGA	Background
T2_CAGTAACAGTGCTGCC	Background
T2_CAGTAACAGTTATCGC	Background
T2_CAGTAACCACGGTAGA	Background
T2_CAGTAACCAGATGAGC	Background
T2_CAGTAACCATGGTCAT	Background
T2_CAGTAACGTTCCACTC	Background
T2_CAGTAACTCAGGTAAA	Background
T2_CAGTCCTGTGCCTGGT	Background
T2_CAGTCCTGTTGACGTT	Background
T2_CAGTCCTTCAACACGT	Background
T2_CAGTCCTTCCACGCAG	Background
[truncated: 39,987 more rows]

## Sheet: 2. DEGAS Cell Labels
Cell	Label
T1_AAACCTGAGATGTCGG	High-Risk
T1_AAACGGGGTCATGCAT	High-Risk
T1_AAAGATGCATGTTGAC	Background
T1_AAAGATGGTCGAGTTT	High-Risk
T1_AAAGATGGTCTCTCTG	Background
T1_AAAGATGTCTTTACAC	Background
T1_AAAGCAAAGTGTACCT	High-Risk
T1_AAAGCAATCACTTCAT	Background
T1_AAAGTAGAGTCGTACT	Background
T1_AAAGTAGCATTACGAC	High-Risk
T1_AAATGCCAGAAACGCC	Background
T1_AACACGTAGAAGGTGA	Background
T1_AACACGTCAATGACCT	Background
T1_AACACGTGTCATATCG	Background
T1_AACACGTGTGCTGTAT	Background
T1_AACCATGCACAACTGT	High-Risk
T1_AACCATGTCTGATTCT	Background
T1_AACCATGTCTGTCCGT	Background
T1_AACCGCGGTACTCGCG	High-Risk
T1_AACCGCGTCGAATGGG	High-Risk
T1_AACGTTGCAATGGATA	High-Risk
T1_AACGTTGGTACCCAAT	High-Risk
T1_AACTCAGCAGCAGTTT	Background
T1_AACTCAGTCGTACCGG	Background
T1_AACTCCCCACATCTTT	Background
T1_AACTCCCCACGAAAGC	Background
T1_AACTCTTAGGTAAACT	High-Risk
T1_AACTCTTAGTACCGGA	Background
T1_AACTGGTTCTAACGGT	Background
T1_AACTTTCAGGATTCGG	High-Risk
T1_AACTTTCCAAGAAGAG	Background
T1_AACTTTCCACACCGAC	High-Risk
T1_AAGACCTAGGCGCTCT	Background
T1_AAGACCTAGTCATGCT	Background
T1_AAGACCTGTCTGGTCG	Background
T1_AAGACCTTCATGTCCC	High-Risk
T1_AAGCCGCAGCGATATA	Background
T1_AAGCCGCCAGTAAGAT	Background
T1_AAGCCGCGTAGGCATG	High-Risk
T1_AAGGAGCAGAGCTGCA	Background
T1_AAGGAGCAGTGGTAGC	Background
T1_AAGGAGCCAATTCCTT	Background
T1_AAGGAGCTCGTTGCCT	Background
T1_AAGGCAGAGTGGCACA	Background
T1_AAGGCAGTCTCTGTCG	Background
T1_AAGGTTCAGTATTGGA	High-Risk
T1_AAGGTTCCATTCTTAC	Background
T1_AAGGTTCGTGTCAATC	Background
T1_AAGGTTCTCATAAAGG	Background
T1_AAGTCTGAGCAAATCA	High-Risk
T1_AATCCAGTCTCCTATA	High-Risk
T1_AATCGGTCAAGTTAAG	Background
T1_AATCGGTCACAGGCCT	Background
T1_ACACCAAAGAGACTTA	High-Risk
T1_ACACCAACAATCCAAC	High-Risk
T1_ACACCAACATGGGAAC	High-Risk
T1_ACACCAAGTGAAAGAG	High-Risk
T1_ACACCCTCAGACGTAG	Background
T1_ACACCGGAGTGCCATT	Background
T1_ACACCGGTCGCTTAGA	Background
T1_ACACTGAAGCATGGCA	High-Risk
T1_ACACTGAAGTGTCCCG	Background
T1_ACACTGAGTCCTGCTT	Background
T1_ACACTGAGTTCAGACT	Background
T1_ACACTGAGTTCGAATC	High-Risk
T1_ACACTGATCACTTCAT	High-Risk
T1_ACAGCCGCATCGACGC	Background
T1_ACAGCCGTCAAGCCTA	High-Risk
T1_ACAGCTACATTGGTAC	Background
T1_ACATACGAGACTCGGA	High-Risk
T1_ACATACGCACGAAACG	High-Risk
T1_ACATACGCAGGTCGTC	Background
T1_ACATACGCATCAGTCA	Background
T1_ACATACGTCAGCCTAA	Background
T1_ACATCAGGTTAAGATG	Background
T1_ACATGGTAGATGTCGG	Background
T1_ACATGGTAGTAGTGCG	Background
T1_ACATGGTCAGAGTGTG	Background
T1_ACATGGTTCTAACGGT	Background
T1_ACATGGTTCTCGCATC	High-Risk
T1_ACCAGTAAGGCTCATT	Background
T1_ACCAGTAGTGCACCAC	Background
T1_ACCAGTATCACATACG	Background
T1_ACCAGTATCCTACAGA	High-Risk
T1_ACCAGTATCTTGCAAG	Background
T1_ACCCACTGTTATTCTC	Background
T1_ACCCACTTCTGCAGTA	Background
T1_ACCGTAATCATGGTCA	Background
T1_ACCTTTAGTTCACCTC	Background
T1_ACCTTTATCAGTTTGG	Background
T1_ACGAGCCGTCCAACTA	High-Risk
T1_ACGAGGAAGCCACGTC	High-Risk
T1_ACGAGGACACCCTATC	Background
T1_ACGAGGAGTATATCCG	Background
T1_ACGAGGATCAGCTGGC	Background
T1_ACGAGGATCGGAGCAA	Background
T1_ACGATACAGTACGTAA	High-Risk
T1_ACGATGTAGGCTATCT	Background
T1_ACGATGTGTACCGTTA	Background
T1_ACGATGTTCACGAAGG	Background
T1_ACGCAGCGTCTGATTG	Background
T1_ACGCAGCTCAGTTGAC	Background
T1_ACGCCAGGTAGAGTGC	Background
T1_ACGCCAGGTCCGAGTC	Background
T1_ACGCCAGTCTTAGCCC	High-Risk
T1_ACGCCGAGTACATGTC	High-Risk
T1_ACGCCGAGTGCACCAC	Background
T1_ACGCCGATCGGATGTT	Background
T1_ACGGAGAAGCGATAGC	Background
T1_ACGGCCACAGTTAACC	Background
T1_ACGGCCAGTAAAGTCA	Background
T1_ACGGCCAGTCCTGCTT	High-Risk
T1_ACGGCCATCAGCTGGC	High-Risk
T1_ACGGGCTAGACAGACC	Background
T1_ACGGGCTCACTGTCGG	High-Risk
T1_ACGGGCTCATCCGTGG	High-Risk
T1_ACGGGTCCATGCGCAC	Background
T1_ACGGGTCTCGTTACGA	Background
T1_ACGTCAACAGGAATCG	Background
T1_ACGTCAATCAACCAAC	Background
T1_ACTATCTAGAACAATC	High-Risk
T1_ACTATCTAGTGTTTGC	High-Risk
T1_ACTATCTGTCTTTCAT	Background
T1_ACTATCTTCTCTGAGA	Background
T1_ACTATCTTCTTATCTG	High-Risk
T1_ACTGAACTCAAAGTAG	High-Risk
T1_ACTGAACTCCCAACGG	High-Risk
T1_ACTGAGTAGTTCGATC	Background
T1_ACTGATGGTATTCTCT	Background
T1_ACTGCTCAGCGATCCC	Background
T1_ACTGCTCGTATAGGGC	High-Risk
T1_ACTGCTCGTCTGATCA	Background
T1_ACTGTCCAGCGATGAC	Background
T1_ACTGTCCGTCAAACTC	Background
T1_ACTGTCCTCAAACAAG	High-Risk
T1_ACTTACTAGAAGAAGC	High-Risk
T1_ACTTACTAGATCGGGT	Background
T1_ACTTGTTGTCAAAGCG	High-Risk
T1_ACTTGTTTCTTTACGT	High-Risk
T1_AGAATAGAGAGCTGCA	High-Risk
T1_AGAATAGGTCCTGCTT	Background
T1_AGAATAGGTGTGGTTT	Background
T1_AGACGTTAGGCGACAT	High-Risk
T1_AGAGCGAAGCGTCAAG	Background
T1_AGAGCGACAAACCCAT	High-Risk
T1_AGAGCGAGTTCACGGC	Background
T1_AGAGTGGCAATCACAC	Background
T1_AGAGTGGCATCACGTA	Background
T1_AGAGTGGGTAAACGCG	Background
T1_AGATCTGCACGAAAGC	High-Risk
T1_AGATCTGGTACGACCC	Background
T1_AGATCTGGTCCCTACT	Background
T1_AGATTGCCATATACCG	Background
T1_AGATTGCGTAGCTGCC	High-Risk
T1_AGCAGCCCAAGCCGCT	High-Risk
T1_AGCAGCCCACGGACAA	Background
T1_AGCATACCAATGCCAT	Background
T1_AGCATACGTAACGACG	Background
T1_AGCATACTCCTGCTTG	Background
T1_AGCGGTCAGCTTATCG	Background
T1_AGCGGTCCACCAGCAC	High-Risk
T1_AGCGGTCTCCGAAGAG	Background
T1_AGCGTATGTATAGTAG	High-Risk
T1_AGCGTCGTCACTCTTA	High-Risk
T1_AGCTCCTCACAGGCCT	Background
T1_AGCTCCTCACCATCCT	Background
T1_AGCTCCTCACTAAGTC	Background
T1_AGCTCTCCACCATCCT	Background
T1_AGCTCTCTCGGAGGTA	Background
T1_AGCTTGAAGCCCTAAT	Background
T1_AGCTTGACACGGACAA	Background
T1_AGCTTGACAGACGCTC	Background
T1_AGCTTGACAGTTCCCT	High-Risk
T1_AGCTTGATCAATCACG	High-Risk
T1_AGGCCACAGTCCCACG	Background
T1_AGGCCACTCCTTTCTC	High-Risk
T1_AGGCCACTCGGCATCG	Background
T1_AGGGAGTCAAGAGGCT	Background
T1_AGGGAGTGTCATATCG	High-Risk
T1_AGGGAGTTCTCCAGGG	Background
T1_AGGGATGAGCTGCCCA	Background
T1_AGGGATGGTAGAAAGG	Background
T1_AGGGATGTCTCTTATG	Background
T1_AGGTCATAGTCCAGGA	Background
T1_AGGTCATCAGGGATTG	Background
T1_AGGTCATCAGGTTTCA	Background
T1_AGGTCATCATCCGGGT	Background
T1_AGGTCATTCCAGGGCT	High-Risk
T1_AGGTCATTCTTGTATC	Background
T1_AGGTCCGAGATGCCAG	High-Risk
T1_AGGTCCGTCTCCAACC	Background
T1_AGTAGTCCAGTAAGCG	Background
T1_AGTAGTCTCAGTACGT	Background
T1_AGTCTTTAGCCAGTAG	Background
T1_AGTCTTTAGGGAACGG	Background
T1_AGTCTTTCATTACGAC	Background
T1_AGTCTTTGTGACAAAT	High-Risk
T1_AGTGAGGAGACAGGCT	Background
T1_AGTGAGGGTAAGTGTA	Background
T1_AGTGAGGTCCAAACAC	Background
T1_AGTGGGACACAGCCCA	High-Risk
T1_AGTGGGACATCGATTG	Background
T1_AGTGGGAGTTACGACT	Background
T1_AGTGGGATCGCCGTGA	Background
T1_AGTGTCAAGCGACGTA	Background
T1_AGTGTCACATTAACCG	Background
T1_AGTGTCAGTACCAGTT	Background
T1_AGTGTCAGTAGCTCCG	Background
T1_AGTGTCAGTCAATGTC	Background
T1_AGTTGGTGTCTCTCTG	Background
T1_AGTTGGTTCAGCAACT	Background
T1_AGTTGGTTCCTCAATT	Background
T1_ATAACGCCACTCAGGC	Background
T1_ATAACGCCAGACTCGC	Background
T1_ATAACGCGTCAGAGGT	Background
T1_ATAACGCGTGTGAATA	Background
T1_ATAAGAGAGCTGCAAG	High-Risk
T1_ATAAGAGTCGGTCCGA	Background
T1_ATAGACCAGGATGGTC	Background
T1_ATAGACCGTACGAAAT	Background
T1_ATAGACCTCCTTGCCA	Background
T1_ATCACGACAGTCAGCC	Background
T1_ATCACGAGTATGAAAC	High-Risk
T1_ATCATCTAGATATGCA	Background
T1_ATCATCTAGCCACTAT	Background
T1_ATCATCTGTAGCGTCC	Background
T1_ATCATCTTCTCTTGAT	Background
T1_ATCATGGTCAGAAATG	High-Risk
T1_ATCCACCCAGGCAGTA	High-Risk
T1_ATCCGAAAGCTCCTTC	Background
T1_ATCCGAAAGGCAGGTT	Background
T1_ATCCGAACACGTCTCT	Background
T1_ATCGAGTCACAGCCCA	High-Risk
T1_ATCGAGTGTAGAGTGC	Background
T1_ATCGAGTGTATCTGCA	Background
T1_ATCGAGTGTGGGTCAA	Background
T1_ATCTACTAGCTGCGAA	High-Risk
T1_ATCTACTTCACCAGGC	High-Risk
T1_ATCTACTTCGTTGACA	Background
T1_ATCTGCCAGCAGCGTA	Background
T1_ATCTGCCTCCTTTACA	Background
T1_ATGCGATGTAAGTGTA	Background
T1_ATGGGAGCAGATCCAT	Background
T1_ATGTGTGTCTTCATGT	High-Risk
T1_ATTACTCAGAAGCCCA	Background
T1_ATTACTCAGGACGAAA	Background
T1_ATTACTCAGTCATCCA	Background
T1_ATTACTCCATGCATGT	Background
T1_ATTACTCGTGCCTGCA	Background
T1_ATTACTCTCTTAGCCC	Background
T1_ATTATCCCATTTCACT	Background
T1_ATTATCCGTAAAGGAG	Background
T1_ATTATCCGTACCTACA	Background
T1_ATTATCCGTCTGGTCG	Background
T1_ATTATCCTCGTCTGCT	Background
T1_ATTCTACAGCAATATG	Background
T1_ATTCTACCAAGTTCTG	Background
T1_ATTCTACCAATGTAAG	Background
T1_ATTCTACTCCTCATTA	Background
T1_ATTGGACAGTTTGCGT	Background
T1_ATTGGACTCCTAGGGC	Background
T1_ATTGGTGAGTCGATAA	Background
T1_ATTTCTGCATCCTTGC	Background
T1_CAACCAAAGAGGTTAT	Background
T1_CAACCAAAGTGTGGCA	Background
T1_CAACCAACAATGTTGC	Background
T1_CAACCAACAGGGTTAG	Background
T1_CAACCAACATGGATGG	Background
T1_CAACCAATCTCTTATG	Background
T1_CAACCTCAGGATTCGG	Background
T1_CAACCTCCAAGTAGTA	High-Risk
T1_CAACCTCCATACTACG	Background
T1_CAACCTCTCAAGATCC	High-Risk
T1_CAAGAAAAGGGAGTAA	Background
T1_CAAGATCAGCCACGCT	Background
T1_CAAGATCCATGATCCA	Background
T1_CAAGGCCAGCTAGCCC	Background
T1_CAAGGCCCATTACCTT	Background
T1_CAAGGCCGTATTCTCT	High-Risk
T1_CAAGGCCTCTAACCGA	Background
T1_CAAGTTGAGAGCTTCT	Background
T1_CAAGTTGAGTAGCCGA	Background
T1_CAAGTTGCAATAAGCA	Background
T1_CAAGTTGTCAGCGATT	High-Risk
T1_CACAAACAGTGATCGG	Background
T1_CACAAACGTTGCGCAC	Background
T1_CACAAACTCACGCGGT	Background
T1_CACAAACTCTGTTGAG	High-Risk
T1_CACACCTGTCAAACTC	High-Risk
T1_CACACCTTCAGCTTAG	High-Risk
T1_CACACTCAGGCACATG	Background
T1_CACAGGCAGAGAACAG	High-Risk
T1_CACAGGCAGCCTATGT	High-Risk
T1_CACAGGCCACCGTTGG	Background
T1_CACAGGCCAGCTGTGC	Background
T1_CACAGGCGTTAGTGGG	Background
T1_CACAGGCTCGACGGAA	Background
T1_CACAGGCTCTTCTGGC	High-Risk
T1_CACAGTACAGCATGAG	Background
T1_CACAGTAGTGGCAAAC	Background
T1_CACAGTATCAACGCTA	Background
T1_CACAGTATCCGGCACA	High-Risk
T1_CACATAGAGGCAGTCA	High-Risk
T1_CACATAGAGTACATGA	High-Risk
T1_CACATAGCATTGGGCC	Background
T1_CACATAGGTTGTGGCC	Background
T1_CACATAGTCAGGCCCA	High-Risk
T1_CACATTTAGCAGGCTA	Background
T1_CACATTTAGCCACTAT	Background
T1_CACATTTGTAGCGCAA	Background
T1_CACCACTGTTGGAGGT	High-Risk
T1_CACCACTTCCGTCAAA	High-Risk
T1_CACCAGGAGTTGTCGT	Background
T1_CACCAGGCACGCTTTC	High-Risk
T1_CACCAGGTCCGTTGTC	High-Risk
T1_CACCTTGAGAGTACAT	Background
T1_CACCTTGAGTAAGTAC	High-Risk
T1_CACCTTGCACGAGAGT	Background
T1_CACCTTGGTTAGAACA	High-Risk
T1_CACTCCAAGCTCTCGG	High-Risk
T1_CACTCCACAGATGGGT	Background
T1_CACTCCAGTGAGGCTA	High-Risk
T1_CAGAATCAGGTGTTAA	High-Risk
T1_CAGAATCAGTTAGCGG	Background
T1_CAGAATCCACGGCGTT	High-Risk
T1_CAGATCAAGGCGCTCT	Background
T1_CAGATCACAGCCTATA	Background
T1_CAGATCATCGTCCAGG	Background
T1_CAGCAGCGTGGCTCCA	Background
T1_CAGCATAAGCGAGAAA	Background
T1_CAGCATAAGTACCGGA	Background
T1_CAGCATACAGTTAACC	Background
T1_CAGCCGAAGCGGCTTC	Background
T1_CAGCCGATCAACACAC	Background
T1_CAGCCGATCTTGTTTG	Background
T1_CAGCGACAGATGCCAG	Background
T1_CAGCGACGTACTCGCG	Background
T1_CAGCGACTCAATCTCT	High-Risk
T1_CAGCTAACAAGCCATT	Background
T1_CAGCTAACACTTAACG	High-Risk
T1_CAGCTAACAGACGCTC	Background
T1_CAGCTAAGTCTGCGGT	High-Risk
T1_CAGCTAAGTGTGGTTT	Background
T1_CAGCTAATCGTTTGCC	Background
T1_CAGCTAATCTCGTATT	Background
T1_CAGCTAATCTGGAGCC	Background
T1_CAGCTGGCACAGCCCA	High-Risk
T1_CAGCTGGTCATAAAGG	Background
T1_CAGCTGGTCTCATTCA	Background
T1_CAGGTGCCATGGGAAC	Background
T1_CAGGTGCGTTGCGCAC	Background
T1_CAGGTGCTCTCTTATG	High-Risk
T1_CAGTAACCACATCTTT	Background
T1_CAGTCCTTCGCGGATC	Background
T1_CATATGGAGGTTACCT	High-Risk
T1_CATATGGTCAGTTAGC	Background
T1_CATCAAGAGCTGATAA	Background
T1_CATCAAGAGTGTGGCA	Background
T1_CATCAAGGTACGCTGC	Background
T1_CATCAAGGTCCGTGAC	Background
T1_CATCAAGTCCCTTGCA	High-Risk
T1_CATCGAACACAACTGT	Background
T1_CATCGAAGTTGAGTTC	Background
T1_CATCGAATCATAAAGG	Background
T1_CATCGGGTCAACACGT	High-Risk
T1_CATCGGGTCAGCTTAG	Background
T1_CATCGGGTCTGCGACG	Background
T1_CATGCCTAGATATACG	Background
T1_CATGCCTAGCTCCTTC	High-Risk
T1_CATGCCTCACAACTGT	Background
T1_CATGCCTCACCACGTG	High-Risk
T1_CATGCCTCATTATCTC	Background
T1_CATGCCTGTTCGTGAT	High-Risk
T1_CATGGCGCAGGATTGG	Background
T1_CATGGCGCATGGGAAC	High-Risk
T1_CATGGCGGTGCCTGCA	Background
T1_CATGGCGTCGCTTGTC	Background
T1_CATTATCAGGCTAGGT	Background
T1_CATTATCAGGCTCAGA	Background
T1_CATTATCCAGGTTTCA	Background
T1_CATTATCGTCTAGCGC	Background
T1_CATTCGCAGCCAGGAT	Background
T1_CATTCGCCACGTAAGG	Background
T1_CCAATCCGTGCCTTGG	Background
T1_CCAATCCTCAGAGGTG	Background
T1_CCACCTAAGTGTGGCA	Background
T1_CCACGGATCATGCAAC	Background
T1_CCAGCGAGTTGTGGAG	Background
T1_CCAGCGATCAAAGTAG	High-Risk
T1_CCATGTCCACCAGGCT	Background
T1_CCATGTCTCCAATGGT	Background
T1_CCATTCGCAGATAATG	High-Risk
T1_CCATTCGGTTACGTCA	Background
T1_CCCAATCAGCACCGCT	High-Risk
T1_CCCAATCGTGGAAAGA	Background
T1_CCCAATCTCCTTAATC	Background
T1_CCCAGTTTCTCTAGGA	High-Risk
T1_CCCATACCACGAAACG	Background
T1_CCCATACCAGTGGGAT	Background
T1_CCCATACGTTGGTTTG	Background
T1_CCGGTAGAGTTAGGTA	Background
T1_CCGTACTCAACAACCT	Background
T1_CCGTACTCACACGCTG	High-Risk
T1_CCGTACTCAGTGACAG	Background
T1_CCGTACTGTAGAAAGG	Background
T1_CCGTACTGTAGCTTGT	Background
T1_CCGTGGACAAGCGATG	Background
T1_CCGTGGACAGCGTCCA	High-Risk
T1_CCGTGGAGTCTAACGT	Background
T1_CCGTGGATCCTAGTGA	Background
T1_CCGTGGATCTTCATGT	High-Risk
T1_CCGTTCACATGTAGTC	High-Risk
T1_CCGTTCAGTAGCCTAT	Background
T1_CCGTTCATCGTGGACC	Background
T1_CCTAAAGAGCTCCTTC	Background
T1_CCTAAAGCACGGTAAG	High-Risk
T1_CCTAAAGTCAAGATCC	High-Risk
T1_CCTAAAGTCGCCAGCA	High-Risk
T1_CCTACACAGAACAATC	High-Risk
T1_CCTACACGTCTAAACC	Background
T1_CCTACCAAGTGCTGCC	Background
T1_CCTAGCTGTCATCGGC	Background
T1_CCTATTAAGGTTACCT	Background
T1_CCTATTAAGTTACGGG	High-Risk
T1_CCTATTAGTGATGATA	Background
T1_CCTATTATCAGGCCCA	High-Risk
T1_CCTCAGTAGTGGGATC	Background
T1_CCTCAGTCAGTAGAGC	Background
T1_CCTCAGTGTATGAAAC	High-Risk
T1_CCTCTGAAGATCCCAT	Background
T1_CCTCTGAGTGATAAGT	Background
T1_CCTCTGAGTTTGGGCC	Background
T1_CCTTACGAGCGCTCCA	Background
T1_CCTTACGGTGTTGGGA	High-Risk
T1_CCTTACGTCAAGCCTA	Background
T1_CCTTCCCCAGGAACGT	Background
T1_CCTTCCCGTGTGGCTC	Background
T1_CCTTCCCTCACATACG	Background
T1_CCTTCCCTCACGATGT	Background
T1_CCTTCCCTCAGCCTAA	Background
T1_CCTTCCCTCCAAACAC	High-Risk
T1_CCTTCGAAGAAACGAG	Background
T1_CCTTCGATCATCTGCC	High-Risk
T1_CCTTCGATCCGCAAGC	Background
T1_CCTTTCTCATTCTCAT	High-Risk
T1_CGAACATAGATGCCAG	Background
T1_CGAACATAGCGCCTTG	Background
T1_CGAACATAGCTACCTA	High-Risk
T1_CGAATGTGTTGTGGAG	Background
T1_CGACCTTCACAGGCCT	Background
T1_CGACCTTGTTATCCGA	Background
T1_CGACCTTGTTGGTAAA	Background
T1_CGACTTCAGATCCCGC	Background
T1_CGAGAAGTCGCATGGC	Background
T1_CGAGAAGTCGTACCGG	Background
T1_CGAGCACTCCGGCACA	Background
T1_CGAGCCAAGCCCAACC	Background
T1_CGAGCCATCCCAACGG	Background
T1_CGATCGGCATTCTTAC	High-Risk
T1_CGATCGGGTCGGCATC	Background
T1_CGATGGCTCCATGAAC	Background
T1_CGATGTAAGACGCACA	Background
T1_CGATTGAAGGCTAGGT	High-Risk
T1_CGATTGAGTCGCTTTC	Background
T1_CGATTGATCACCACCT	High-Risk
T1_CGCGGTAAGGCTACGA	High-Risk
T1_CGCGGTACAGGTGGAT	Background
T1_CGCGGTAGTACAGCAG	High-Risk
T1_CGCGTTTGTACAGTGG	High-Risk
T1_CGCTATCAGGGAACGG	Background
T1_CGCTATCGTAAGGATT	High-Risk
T1_CGCTTCATCCCTAACC	High-Risk
T1_CGGACACAGCGATCCC	High-Risk
T1_CGGACGTCAGTAACGG	Background
T1_CGGACGTTCTGCTGTC	Background
T1_CGGACTGAGTTGAGTA	Background
T1_CGGACTGTCATGCTCC	High-Risk
T1_CGGACTGTCTTAACCT	High-Risk
T1_CGGAGTCGTAGCTAAA	High-Risk
T1_CGGCTAGCAAGGACAC	High-Risk
T1_CGGCTAGCACAAGCCC	Background
T1_CGGCTAGTCCAAGTAC	Background
T1_CGGCTAGTCCGCAAGC	Background
T1_CGGGTCATCCCAAGTA	Background
T1_CGGGTCATCGCTTAGA	Background
T1_CGGTTAAAGTGTTGAA	Background
T1_CGGTTAACAGACGCCT	Background
T1_CGGTTAACATCGGGTC	Background
T1_CGGTTAAGTTGAGGTG	High-Risk
T1_CGGTTAAGTTTGGCGC	Background
T1_CGTAGCGGTCTAGCGC	Background
T1_CGTAGCGTCAGGCGAA	Background
T1_CGTAGGCTCCTCTAGC	High-Risk
T1_CGTAGGCTCGATCCCT	Background
T1_CGTAGGCTCGCCAAAT	Background
T1_CGTCACTCAAAGCGGT	Background
T1_CGTCACTTCACCAGGC	Background
T1_CGTCCATCAATAGCAA	Background
T1_CGTCCATGTAAACGCG	Background
T1_CGTCCATGTCATGCCG	Background
T1_CGTCCATTCCTGCAGG	High-Risk
T1_CGTCTACAGGATATAC	Background
T1_CGTGAGCTCACTATTC	Background
T1_CGTGTAACATGCAACT	High-Risk
T1_CGTGTAAGTAGCTCCG	Background
T1_CGTGTAATCACATACG	High-Risk
T1_CGTGTAATCTCGCTTG	Background
T1_CGTGTCTGTGCGGTAA	Background
T1_CGTGTCTTCATTGCGA	Background
T1_CGTGTCTTCCCTTGCA	Background
T1_CGTGTCTTCGTGACAT	High-Risk
T1_CGTTAGATCCTATTCA	Background
T1_CGTTCTGAGGAATTAC	Background
T1_CGTTCTGAGGACCACA	Background
T1_CGTTCTGTCCGCATAA	Background
T1_CGTTGGGAGTGCGTGA	Background
T1_CGTTGGGCACATGGGA	High-Risk
T1_CTAACTTAGCACGCCT	Background
T1_CTAACTTAGGGCACTA	Background
T1_CTAACTTGTCACCCAG	Background
T1_CTAACTTGTTAAAGTG	Background
T1_CTAACTTTCCGGCACA	Background
T1_CTAACTTTCTTGGGTA	Background
T1_CTAAGACTCAAACGGG	Background
T1_CTAATGGCACAGATTC	Background
T1_CTACACCCATAGACTC	Background
T1_CTACACCGTTCGTTGA	Background
T1_CTACACCTCGCTTAGA	High-Risk
T1_CTACATTTCATACGGT	High-Risk
T1_CTACATTTCCCATTTA	Background
T1_CTACCCAAGCAGGCTA	High-Risk
T1_CTACCCACATGGTCTA	High-Risk
T1_CTACCCACATTCCTCG	Background
T1_CTACCCATCCTTTCTC	Background
T1_CTACCCATCTGCTGTC	High-Risk
T1_CTACGTCAGACTAGAT	High-Risk
T1_CTACGTCAGCGCCTCA	Background
T1_CTACGTCCATGACGGA	High-Risk
T1_CTACGTCTCACTTACT	High-Risk
T1_CTAGCCTAGCGTTTAC	Background
T1_CTAGCCTGTTCCATGA	High-Risk
T1_CTAGCCTTCAACGGCC	Background
T1_CTAGTGAAGCCACGCT	Background
T1_CTAGTGACAATCTACG	Background
T1_CTAGTGACATAGGATA	High-Risk
T1_CTAGTGATCATCACCC	High-Risk
T1_CTCACACAGGGTATCG	Background
T1_CTCACACCAAACTGTC	High-Risk
T1_CTCACACTCAACACGT	Background
T1_CTCACACTCATTGCCC	Background
T1_CTCAGAAAGAAGAAGC	Background
T1_CTCAGAAAGTGGGATC	Background
T1_CTCAGAATCAGAGACG	Background
T1_CTCATTAAGCGTCAAG	Background
T1_CTCATTACACGTCAGC	Background
T1_CTCATTAGTCTAAACC	Background
T1_CTCATTATCAGTTTGG	High-Risk
T1_CTCCTAGCATGCCTTC	Background
T1_CTCCTAGTCTTAGCCC	Background
T1_CTCGAAAAGAAACCTA	Background
T1_CTCGAAAAGTCAATAG	High-Risk
T1_CTCGAAATCACCATAG	Background
T1_CTCGAGGAGAGTTGGC	Background
T1_CTCGAGGAGCGTTCCG	Background
T1_CTCGAGGAGCTGCAAG	Background
T1_CTCGAGGGTTATTCTC	Background
T1_CTCGGAGAGCGACGTA	High-Risk
T1_CTCGGAGAGCTAAGAT	High-Risk
T1_CTCGGAGGTAGCCTAT	Background
T1_CTCGGGACATGGTCAT	High-Risk
T1_CTCGTACAGTTAACGA	High-Risk
T1_CTCGTACCAACACGCC	Background
T1_CTCGTACGTAATAGCA	High-Risk
T1_CTCGTACGTCAACATC	High-Risk
T1_CTCGTCATCAACTCTT	Background
T1_CTCGTCATCACGACTA	Background
T1_CTCTAATCAAATACAG	Background
T1_CTCTAATCATGGTTGT	High-Risk
T1_CTCTAATGTCTGGAGA	High-Risk
T1_CTCTACGCAATCCAAC	High-Risk
T1_CTCTGGTCATTATCTC	High-Risk
T1_CTCTGGTTCTCGGACG	Background
T1_CTGAAACAGACTGGGT	Background
T1_CTGAAACCACCCTATC	Background
T1_CTGAAGTCACACGCTG	Background
T1_CTGAAGTCATTGGGCC	High-Risk
T1_CTGATAGAGTCGAGTG	High-Risk
T1_CTGATAGGTTGTGGCC	Background
T1_CTGATAGTCAGATAAG	Background
T1_CTGATCCAGTACGACG	Background
T1_CTGATCCCATCGATGT	High-Risk
T1_CTGATCCGTCTAACGT	High-Risk
T1_CTGCCTAAGTAGCCGA	High-Risk
T1_CTGCCTAGTTTGACTG	Background
T1_CTGCGGATCTCTGCTG	High-Risk
T1_CTGCTGTAGTTAACGA	High-Risk
T1_CTGCTGTCACCGCTAG	Background
T1_CTGCTGTGTACTCGCG	Background
T1_CTGCTGTTCACCATAG	High-Risk
T1_CTGCTGTTCGATGAGG	Background
T1_CTGGTCTCAAACGTGG	High-Risk
T1_CTGGTCTCACGTAAGG	High-Risk
T1_CTGGTCTGTTGAGGTG	High-Risk
T1_CTGGTCTTCTTCATGT	Background
T1_CTGTGCTCAAATCCGT	Background
T1_CTGTGCTCACGAAACG	Background
T1_CTGTGCTCATGTCTCC	Background
T1_CTGTGCTGTGTAAGTA	High-Risk
T1_CTGTTTAAGGGTTCCC	Background
T1_CTTAACTGTCTCTCTG	Background
T1_CTTAACTTCAGTCCCT	High-Risk
T1_CTTACCGAGAAACCTA	High-Risk
T1_CTTACCGCAGTAAGAT	Background
T1_CTTACCGCATCACCCT	Background
T1_CTTACCGTCGGTTCGG	Background
T1_CTTACCGTCTGATACG	Background
T1_CTTAGGAAGCTAGTCT	Background
T1_CTTAGGACAAATCCGT	High-Risk
T1_CTTAGGACAGCCTGTG	Background
T1_CTTAGGACATCGGAAG	Background
T1_CTTAGGATCTTGCAAG	High-Risk
T1_CTTCTCTCATATGCTG	High-Risk
T1_CTTCTCTGTTATCACG	Background
T1_CTTGGCTAGAGAGCTC	High-Risk
T1_CTTGGCTTCCCGGATG	High-Risk
T1_CTTTGCGAGCCACCTG	Background
T1_CTTTGCGCAAGGACAC	Background
T1_GAAACTCAGCTGAAAT	Background
T1_GAAACTCAGGCGTACA	Background
T1_GAAACTCAGTCAAGGC	Background
T1_GAAACTCCACCGAAAG	Background
T1_GAAACTCCAGCGTCCA	Background
T1_GAAACTCGTGTATGGG	Background
T1_GAAACTCTCCTCCTAG	Background
T1_GAAACTCTCTATCCCG	High-Risk
T1_GAAACTCTCTTCGGTC	Background
T1_GAACATCTCTTGTATC	Background
T1_GAACCTATCAAACCAC	High-Risk
T1_GAAGCAGGTACTTAGC	High-Risk
T1_GAAGCAGGTTAAGGGC	Background
T1_GAATAAGCAGGCTCAC	Background
T1_GAATAAGGTCGCTTCT	High-Risk
T1_GAATAAGTCTCTAAGG	Background
T1_GAATAAGTCTGCAGTA	Background
T1_GAATGAAGTTACGGAG	Background
T1_GACACGCAGGGAGTAA	High-Risk
T1_GACACGCCATCGGTTA	High-Risk
T1_GACACGCGTACGAAAT	High-Risk
T1_GACACGCTCTAACTCT	High-Risk
T1_GACAGAGCAGTCAGAG	High-Risk
T1_GACAGAGTCAAGCCTA	Background
T1_GACCAATCACGACTCG	High-Risk
T1_GACCAATCAGCTGGCT	High-Risk
T1_GACCAATGTGCAACGA	Background
T1_GACCTGGCACTTCTGC	High-Risk
T1_GACCTGGCATGGTAGG	Background
T1_GACCTGGTCCGTAGTA	Background
T1_GACGCGTAGTCCAGGA	Background
T1_GACGCGTTCTTACCTA	High-Risk
T1_GACGGCTCAGCCTTTC	High-Risk
T1_GACGTGCAGAGCTTCT	High-Risk
T1_GACGTGCAGAGGGCTT	High-Risk
T1_GACGTGCGTGCAGACA	Background
T1_GACGTGCTCTAGAGTC	High-Risk
T1_GACGTTAAGAGCCCAA	Background
T1_GACGTTAAGTCGTACT	Background
T1_GACGTTACAACTGCTA	High-Risk
T1_GACGTTATCGCGTTTC	Background
T1_GACTAACCAGATCTGT	Background
T1_GACTACAAGGCTAGAC	Background
T1_GACTACACAGCTCCGA	Background
T1_GACTACAGTAGCTAAA	Background
T1_GACTGCGAGCCAGAAC	High-Risk
T1_GACTGCGAGCCGTCGT	High-Risk
T1_GACTGCGGTTCGAATC	Background
T1_GACTGCGTCACTATTC	Background
T1_GACTGCGTCCGCGTTT	Background
T1_GACTGCGTCCTTGACC	High-Risk
T1_GAGCAGAGTCTAGCGC	Background
T1_GAGCAGATCGTCCAGG	Background
T1_GAGCAGATCTCCCTGA	Background
T1_GAGCAGATCTTGTACT	High-Risk
T1_GAGGTGAGTAGCGCTC	Background
T1_GAGGTGATCTCTTGAT	High-Risk
T1_GAGTCCGTCAAAGTAG	High-Risk
T1_GATCAGTAGTACATGA	High-Risk
T1_GATCAGTGTATCTGCA	High-Risk
T1_GATCGATCACCTATCC	Background
T1_GATCGATTCTCAAACG	High-Risk
T1_GATCGCGAGCTTTGGT	Background
T1_GATCGCGGTCAGAGGT	High-Risk
T1_GATCGCGGTCGCGAAA	Background
T1_GATCGTAGTGCAACTT	Background
T1_GATCTAGAGCTCCCAG	High-Risk
T1_GATCTAGCATCCGGGT	Background
T1_GATGAAACAGGCAGTA	High-Risk
T1_GATGAAAGTATAATGG	Background
T1_GATGAAAGTGGTCTCG	Background
T1_GATGAGGCAAACAACA	Background
T1_GATGAGGCACCATGTA	Background
T1_GATGCTAAGTACACCT	Background
T1_GATGCTACATGCCTAA	High-Risk
T1_GATGCTAGTCCAGTAT	Background
T1_GATGCTATCGGAGCAA	High-Risk
T1_GATTCAGCATGGTTGT	Background
T1_GATTCAGCATTCTCAT	High-Risk
T1_GATTCAGGTATTCGTG	Background
T1_GCAAACTAGCGTTCCG	Background
T1_GCAATCAAGATCCTGT	Background
T1_GCAATCACACTCAGGC	Background
T1_GCAATCATCAAGATCC	Background
T1_GCACATACAGTCGATT	Background
T1_GCACTCTAGCGTGAAC	High-Risk
T1_GCACTCTCATGGGACA	Background
T1_GCACTCTGTCATGCCG	High-Risk
T1_GCACTCTGTGTGAAAT	Background
T1_GCACTCTTCCGTTGCT	High-Risk
T1_GCACTCTTCGGCTTGG	Background
T1_GCACTCTTCGTTGCCT	Background
T1_GCACTCTTCTTCGGTC	Background
T1_GCAGTTAGTTAAGGGC	Background
T1_GCAGTTATCTCGGACG	Background
T1_GCATACAAGAAGGTTT	High-Risk
T1_GCATACAAGCCACCTG	Background
T1_GCATACAAGGCTAGAC	High-Risk
T1_GCATACACACAGACAG	Background
T1_GCATACATCAGTCCCT	Background
T1_GCATACATCGTGGTCG	Background
T1_GCATGATAGTCGCCGT	Background
T1_GCATGATGTAAGCACG	Background
T1_GCATGATGTGACGCCT	Background
T1_GCATGATTCCCGGATG	Background
T1_GCATGCGAGAGTACCG	Background
T1_GCATGCGGTACCAGTT	Background
T1_GCATGTAAGCTAGTTC	Background
T1_GCCAAATGTCCGTGAC	Background
T1_GCCTCTATCGGACAAG	Background
T1_GCGACCAGTTAGATGA	Background
T1_GCGACCAGTTCACGGC	Background
T1_GCGAGAAAGGCAATTA	Background
T1_GCGAGAACATCAGTCA	High-Risk
T1_GCGCAACTCCAATGGT	High-Risk
T1_GCGCAACTCTATCGCC	Background
T1_GCGCAGTAGAAACCAT	High-Risk
T1_GCGCAGTAGCCCTAAT	High-Risk
T1_GCGCAGTAGCTTATCG	Background
T1_GCGCAGTTCAACCATG	Background
T1_GCGCCAATCAGTTGAC	Background
T1_GCGCCAATCATGTCCC	Background
T1_GCGCCAATCCGCAGTG	Background
T1_GCGCGATAGTGCGTGA	High-Risk
T1_GCGCGATGTCTGCAAT	Background
T1_GCGCGATGTGTAATGA	High-Risk
T1_GCGGGTTAGACGCAAC	Background
T1_GCTCCTACAAAGTCAA	High-Risk
T1_GCTCCTACAAGAAGAG	High-Risk
T1_GCTCCTACAAGGACTG	Background
T1_GCTCTGTAGGACTGGT	High-Risk
T1_GCTGCAGCACAGCCCA	High-Risk
T1_GCTGCAGGTGTTGAGG	High-Risk
T1_GCTGCGACACAGATTC	High-Risk
T1_GCTGCGATCATAGCAC	High-Risk
T1_GCTGCGATCTTTAGTC	Background
T1_GCTGCTTAGGTAAACT	High-Risk
T1_GCTGCTTAGTTGTAGA	Background
T1_GCTGCTTGTACTTGAC	Background
T1_GCTGCTTGTCCGAATT	Background
T1_GCTGCTTGTGTTGGGA	High-Risk
T1_GCTGCTTTCTTCCTTC	Background
T1_GCTGGGTAGCGTGAAC	Background
T1_GCTGGGTAGTTAGGTA	Background
T1_GCTGGGTGTTTAAGCC	High-Risk
T1_GCTGGGTGTTTGACAC	High-Risk
T1_GCTGGGTTCATTTGGG	High-Risk
T1_GCTTCCAAGATGCCAG	High-Risk
T1_GCTTCCAGTAGCTTGT	Background
T1_GCTTCCAGTCAAAGCG	Background
T1_GCTTCCATCATGCATG	Background
T1_GCTTGAATCATAACCG	Background
T1_GGAACTTGTCCAAGTT	Background
T1_GGAACTTGTCTGCGGT	Background
T1_GGACAAGGTCTACCTC	High-Risk
T1_GGACAAGGTTGCTCCT	High-Risk
T1_GGACAAGGTTTCCACC	High-Risk
T1_GGACAGATCTACCAGA	Background
T1_GGACATTTCAAACGGG	High-Risk
T1_GGACGTCCAATCGAAA	Background
T1_GGACGTCCAATGGTCT	High-Risk
T1_GGACGTCCAGTACACT	Background
T1_GGACGTCCAGTTTACG	Background
T1_GGACGTCTCCTAAGTG	High-Risk
T1_GGACGTCTCTGCGGCA	High-Risk
T1_GGAGCAACATAAGACA	Background
T1_GGAGCAATCAACGAAA	Background
T1_GGAGCAATCTACTATC	High-Risk
T1_GGAGCAATCTGACCTC	Background
T1_GGATGTTAGCTCAACT	High-Risk
T1_GGATTACAGCCCGAAA	Background
T1_GGATTACTCCTTTACA	Background
T1_GGCAATTCACTCAGGC	High-Risk
T1_GGCCGATAGTACGATA	Background
T1_GGCGACTAGGAGTACC	Background
T1_GGCGTGTTCGTATCAG	Background
T1_GGCTCGAGTAGCCTCG	High-Risk
T1_GGCTGGTCAAAGTGCG	Background
T1_GGCTGGTGTCTGCAAT	Background
T1_GGGAATGAGACAGAGA	Background
T1_GGGAATGAGTCGAGTG	Background
T1_GGGAATGCATTATCTC	High-Risk
T1_GGGAATGTCTTGGGTA	Background
T1_GGGACCTCACAAGCCC	High-Risk
T1_GGGACCTCACGAAAGC	Background
T1_GGGACCTCATTGAGCT	Background
T1_GGGACCTGTCGCATAT	High-Risk
T1_GGGAGATAGGCGCTCT	High-Risk
T1_GGGCACTCATGGTTGT	Background
T1_GGGCATCAGATCCCAT	Background
T1_GGGCATCCAGGATTGG	Background
T1_GGGCATCTCACATACG	Background
T1_GGGTCTGCACGGACAA	Background
T1_GGGTCTGGTAACGACG	Background
T1_GGGTCTGGTAGATTAG	Background
T1_GGGTCTGTCTGGTGTA	Background
T1_GGTATTGAGGACAGAA	Background
T1_GGTATTGTCGAACGGA	High-Risk
T1_GGTGAAGAGTGTACTC	Background
T1_GGTGAAGCATTCTCAT	Background
T1_GGTGAAGGTTTGTGTG	Background
T1_GGTGTTACAGTTCCCT	Background
T1_GGTGTTAGTTGGTGGA	Background
T1_GGTGTTATCGTTTATC	High-Risk
T1_GTAACGTCACCGAATT	Background
T1_GTAACTGCATGGAATA	Background
T1_GTAACTGGTAGCGTCC	High-Risk
T1_GTAACTGTCCGCATCT	Background
T1_GTAACTGTCTGTCAAG	Background
T1_GTACGTAAGGGATGGG	Background
T1_GTACGTAAGTGGTAAT	High-Risk
T1_GTACGTAGTTGATTGC	Background
T1_GTACGTATCGCTGATA	Background
T1_GTACTCCAGGCTCTTA	High-Risk
T1_GTACTCCGTTCGTTGA	High-Risk
T1_GTACTTTAGACGCACA	High-Risk
T1_GTACTTTGTCTCTCGT	Background
T1_GTACTTTTCTGAGGGA	High-Risk
T1_GTAGTCAGTAATCACC	Background
T1_GTATCTTAGACTGTAA	Background
T1_GTATCTTGTACCGCTG	High-Risk
T1_GTATCTTGTGTTGGGA	High-Risk
T1_GTATCTTTCACCGTAA	High-Risk
T1_GTATTCTCATTAACCG	High-Risk
T1_GTATTCTGTCTCAACA	Background
T1_GTCACAACAATCTGCA	Background
T1_GTCACAACATGGGACA	High-Risk
T1_GTCACAATCCCTTGTG	Background
T1_GTCACGGGTAAATGAC	Background
T1_GTCACGGGTAATAGCA	Background
T1_GTCATTTAGTGGTAGC	High-Risk
T1_GTCATTTTCAACCATG	High-Risk
T1_GTCCTCACAAGGCTCC	Background
T1_GTCCTCACACCAGTTA	Background
T1_GTCCTCAGTAAGTGTA	Background
T1_GTCCTCATCCACGCAG	High-Risk
T1_GTCCTCATCCGCGCAA	Background
T1_GTCGGGTTCCTAGGGC	Background
T1_GTCGTAAAGATACACA	High-Risk
T1_GTCGTAAGTGACGCCT	Background
T1_GTCTCGTAGGGCTTCC	High-Risk
T1_GTCTCGTTCGTGGTCG	Background
T1_GTGAAGGTCGGTGTCG	Background
T1_GTGCAGCCAGATGGCA	High-Risk
T1_GTGCAGCGTTCTGGTA	Background
T1_GTGCATAAGCTGAACG	Background
T1_GTGCATACACGACGAA	Background
T1_GTGCATAGTGGAAAGA	Background
T1_GTGCATATCTGTGCAA	Background
T1_GTGCTTCAGCCCGAAA	Background
T1_GTGCTTCCAAGTAATG	Background
T1_GTGCTTCTCCTTGGTC	Background
T1_GTGGGTCCAGTATAAG	Background
T1_GTGGGTCTCCCACTTG	Background
T1_GTGTGCGAGAAACCGC	High-Risk
T1_GTGTGCGAGGCATTGG	Background
T1_GTGTGCGCAGTCACTA	High-Risk
T1_GTGTGCGGTTCGGCAC	Background
T1_GTGTTAGCAGTATGCT	High-Risk
T1_GTGTTAGCATACCATG	Background
T1_GTGTTAGGTTGACGTT	Background
T1_GTTAAGCCAGTCTTCC	Background
T1_GTTAAGCTCACCTTAT	Background
T1_GTTACAGAGCTAGTTC	Background
T1_GTTACAGCAATGTTGC	Background
T1_GTTACAGTCACAGTAC	Background
T1_GTTCATTAGTGGACGT	Background
T1_GTTCATTGTCGATTGT	Background
T1_GTTCATTTCACCGGGT	Background
T1_GTTCATTTCACCGTAA	Background
T1_GTTCATTTCGTATCAG	High-Risk
T1_GTTCGGGGTCGAATCT	Background
T1_GTTCGGGTCGTTGACA	Background
T1_GTTCGGGTCTATCCCG	High-Risk
T1_GTTCTCGAGTCCGGTC	Background
T1_GTTCTCGGTAGTAGTA	Background
T1_GTTCTCGGTCTAAAGA	High-Risk
T1_GTTCTCGGTTTGGCGC	Background
T1_GTTTCTACATCGATGT	Background
T1_GTTTCTACATGCTAGT	High-Risk
T1_TAAACCGCAACACCTA	Background
T1_TAAACCGCATTGTGCA	Background
T1_TAAACCGGTAAGAGGA	High-Risk
T1_TAAACCGTCGAGAGCA	Background
T1_TAAGAGAAGGTGCTTT	High-Risk
T1_TAAGAGACAACTGCGC	Background
T1_TAAGAGAGTCACCCAG	Background
T1_TAAGAGAGTTCTGTTT	Background
T1_TAAGAGATCTCTGCTG	High-Risk
T1_TAAGCGTAGAGGTACC	Background
T1_TAAGTGCAGCATCATC	Background
T1_TAAGTGCCAGGGCATA	Background
T1_TAAGTGCGTACCGTAT	Background
T1_TACACGAAGCAGATCG	Background
T1_TACACGACAGGTCCAC	Background
T1_TACACGAGTGCCTGGT	High-Risk
T1_TACACGAGTGCGGTAA	Background
T1_TACACGATCGACCAGC	Background
T1_TACAGTGCACGACTCG	Background
T1_TACAGTGCACTGCCAG	High-Risk
T1_TACAGTGTCAGCTCGG	Background
T1_TACAGTGTCGCTAGCG	Background
T1_TACCTATCATGCTAGT	Background
T1_TACCTTAAGCCCAATT	Background
T1_TACCTTACAAGCCATT	Background
T1_TACCTTACAGGACCCT	Background
T1_TACCTTATCAGATAAG	Background
T1_TACCTTATCTATCCTA	Background
T1_TACCTTATCTCGCTTG	High-Risk
T1_TACGGATAGCGTCAAG	Background
T1_TACGGATGTCAGTGGA	Background
T1_TACGGGCCAGCGAACA	Background
T1_TACGGGCGTACTTGAC	Background
T1_TACGGTAAGATACACA	High-Risk
T1_TACTCATTCAGTTGAC	Background
T1_TACTCGCTCCCGACTT	Background
T1_TACTTGTAGGTGCTAG	High-Risk
T1_TACTTGTAGTGAACAT	High-Risk
T1_TACTTGTGTAAAGTCA	Background
T1_TACTTGTGTTTAGCTG	High-Risk
T1_TACTTGTTCAGTCAGT	Background
T1_TAGACCAAGGGTCGAT	Background
T1_TAGACCATCCAAACAC	High-Risk
T1_TAGAGCTTCCTCTAGC	Background
T1_TAGAGCTTCGCATGAT	High-Risk
T1_TAGCCGGCACGGTTTA	High-Risk
T1_TAGCCGGCATCGGTTA	Background
T1_TAGCCGGTCTAGCACA	Background
T1_TAGGCATGTAACGACG	Background
T1_TAGTGGTAGGGAGTAA	High-Risk
T1_TAGTGGTTCAACACCA	Background
T1_TAGTTGGAGGGAACGG	High-Risk
T1_TAGTTGGCAGCCAGAA	Background
T1_TAGTTGGCAGGCGATA	Background
T1_TAGTTGGGTGGCGAAT	High-Risk
T1_TAGTTGGTCGTTGACA	Background
T1_TATCTCACAAGAGGCT	High-Risk
T1_TATCTCACAATAGAGT	Background
T1_TATGCCCAGCCAACAG	Background
T1_TATGCCCCAATCGGTT	Background
T1_TATGCCCCACGACGAA	Background
T1_TATGCCCTCGGCATCG	Background
T1_TATGCCCTCTTATCTG	Background
T1_TATTACCGTGCTTCTC	High-Risk
T1_TCAACGAAGCTAAACA	Background
T1_TCAACGACACCAGGCT	High-Risk
T1_TCAACGATCAACACTG	High-Risk
T1_TCAATCTAGAAAGTGG	Background
T1_TCAATCTAGCTTCGCG	Background
T1_TCAATCTCAAAGGAAG	Background
T1_TCAATCTGTATCGCAT	Background
T1_TCAATCTGTCGACTAT	High-Risk
T1_TCACAAGCAGCTGTGC	Background
T1_TCACGAACACACAGAG	Background
T1_TCACGAATCACAAACC	High-Risk
T1_TCAGATGCAGAGCCAA	Background
T1_TCAGATGTCCTCAACC	Background
T1_TCAGCAACAGTCGATT	High-Risk
T1_TCAGCAAGTAGCAAAT	Background
T1_TCAGCAATCATTATCC	High-Risk
T1_TCAGCTCCAAACCTAC	High-Risk
T1_TCAGCTCGTGATAAAC	Background
T1_TCAGGATCACCAGGTC	Background
T1_TCAGGATGTACTTCTT	High-Risk
T1_TCATTACGTAATCACC	Background
T1_TCATTACGTGACCAAG	Background
T1_TCATTACGTTCTGGTA	High-Risk
T1_TCATTTGTCACAATGC	Background
T1_TCATTTGTCTACTCAT	Background
T1_TCCACACAGGACATTA	Background
T1_TCCACACGTCTTTCAT	Background
T1_TCCACACGTTACGGAG	Background
T1_TCCCGATCAGGGTATG	Background
T1_TCGAGGCTCAGCTTAG	Background
T1_TCGCGAGCAAGCTGGA	High-Risk
T1_TCGCGTTCATGCGCAC	Background
T1_TCGCGTTTCAACACTG	High-Risk
T1_TCGCGTTTCACATAGC	Background
T1_TCGGGACCACTAAGTC	High-Risk
T1_TCGGGACGTTAAGAAC	Background
T1_TCGGTAAAGTACCGGA	Background
T1_TCGGTAACAACGATGG	Background
T1_TCGGTAATCCCTGACT	Background
T1_TCGGTAATCTTGCATT	High-Risk
T1_TCGTACCAGAGTCTGG	High-Risk
T1_TCGTACCAGTTATCGC	High-Risk
T1_TCGTACCTCTAGCACA	High-Risk
T1_TCGTAGACAGCTGGCT	High-Risk
T1_TCGTAGAGTGGGTCAA	Background
T1_TCGTAGAGTTGGTTTG	Background
T1_TCTATTGAGGGATACC	Background
T1_TCTATTGCAGGGAGAG	Background
T1_TCTATTGTCGGTTCGG	Background
T1_TCTATTGTCGTCACGG	High-Risk
T1_TCTATTGTCTACTATC	High-Risk
T1_TCTATTGTCTCAAGTG	Background
T1_TCTCATAAGTTCCACA	Background
T1_TCTCATACAGACAAAT	High-Risk
T1_TCTCATACAGACAAGC	Background
T1_TCTCATACAGTCCTTC	Background
T1_TCTCATACATGTCGAT	High-Risk
T1_TCTCATAGTATCAGTC	Background
T1_TCTCATATCTTACCTA	Background
T1_TCTCTAAAGTCTCCTC	Background
T1_TCTCTAATCCTGCTTG	Background
T1_TCTGAGAAGAAGAAGC	High-Risk
T1_TCTGGAAAGCACACAG	Background
T1_TCTGGAAGTTACTGAC	High-Risk
T1_TCTTCGGAGACCACGA	High-Risk
T1_TCTTCGGCAATGGATA	Background
T1_TCTTTCCTCATACGGT	Background
T1_TCTTTCCTCTTAGCCC	Background
T1_TGAAAGAAGGACAGAA	High-Risk
T1_TGAAAGACACCGTTGG	Background
T1_TGAAAGACACTTAAGC	Background
T1_TGAAAGATCACAAACC	High-Risk
T1_TGACAACAGAATGTGT	High-Risk
T1_TGACGGCAGAATAGGG	High-Risk
T1_TGACGGCTCGGCATCG	Background
T1_TGACTAGGTCTAAAGA	Background
T1_TGACTAGTCCTGCAGG	Background
T1_TGACTTTGTAGTGAAT	Background
T1_TGAGAGGCATGCAACT	Background
T1_TGAGAGGGTCAAAGAT	Background
T1_TGAGAGGTCATCTGTT	Background
T1_TGAGCATTCGGCGGTT	Background
T1_TGAGCCGAGTACGCGA	Background
T1_TGAGCCGCACCGTTGG	Background
T1_TGAGCCGTCCCTCTTT	High-Risk
T1_TGAGGGAAGGCAGTCA	Background
T1_TGATTTCAGCACCGTC	Background
T1_TGATTTCGTTGACGTT	High-Risk
T1_TGCACCTAGACATAAC	High-Risk
T1_TGCACCTGTCGGCACT	Background
T1_TGCCAAAAGGTGCTTT	Background
T1_TGCCAAAAGTGGCACA	High-Risk
T1_TGCCAAACACGAGAGT	High-Risk
T1_TGCCAAATCATCACCC	Background
T1_TGCCAAATCTGCAAGT	Background
T1_TGCCCATTCCTTTCGG	Background
T1_TGCCCTATCTATCGCC	Background
T1_TGCGCAGCAGGATTGG	Background
T1_TGCGCAGGTACTTGAC	High-Risk
T1_TGCGCAGTCACCATAG	Background
T1_TGCGCAGTCTGGAGCC	Background
T1_TGCGGGTCACAGAGGT	Background
T1_TGCGGGTCATCCCACT	Background
T1_TGCGGGTGTACAGACG	Background
T1_TGCGGGTTCCTCTAGC	Background
T1_TGCGTGGTCGTGGTCG	Background
T1_TGCTACCGTACACCGC	Background
T1_TGCTACCTCCAGTATG	Background
T1_TGCTGCTCAACTGGCC	Background
T1_TGCTGCTCATTAGGCT	High-Risk
T1_TGGACGCCAATACGCT	Background
T1_TGGACGCCAATGGAGC	Background
T1_TGGACGCGTCTTGATG	Background
T1_TGGACGCTCCATGCTC	High-Risk
T1_TGGCCAGAGCAACGGT	Background
T1_TGGCCAGTCCACGTTC	High-Risk
T1_TGGCTGGGTACGAAAT	Background
T1_TGGCTGGTCTGTGCAA	High-Risk
T1_TGGGAAGGTTGATTCG	Background
T1_TGGGCGTAGATCACGG	Background
T1_TGGGCGTAGGAGTACC	High-Risk
T1_TGGTTCCCAATGCCAT	Background
T1_TGGTTCCGTCAAACTC	Background
T1_TGGTTCCGTCTCAACA	High-Risk
T1_TGTCCCAAGGCAGTCA	High-Risk
T1_TGTCCCACAAAGCGGT	Background
T1_TGTCCCAGTCTCCACT	Background
T1_TGTGGTAGTAACGACG	Background
T1_TGTGGTAGTTGGTAAA	Background
T1_TGTGGTATCTATCGCC	High-Risk
T1_TGTGTTTCAATAGCAA	Background
T1_TGTGTTTCAGCTCGCA	Background
T1_TGTGTTTTCATTGCGA	High-Risk
T1_TGTTCCGTCAACACTG	Background
T1_TTAACTCAGCTAGTCT	High-Risk
T1_TTAACTCAGGAATTAC	Background
T1_TTAACTCCAGGCTCAC	High-Risk
T1_TTAACTCTCATGTCTT	Background
T1_TTAACTCTCGCGCCAA	Background
T1_TTAGGACAGCGTCTAT	High-Risk
T1_TTAGGACCATGCAATC	Background
T1_TTAGGCAAGAAACGAG	Background
T1_TTAGTTCAGTGTACTC	Background
T1_TTAGTTCGTAGCACGA	Background
T1_TTAGTTCGTCCCGACA	High-Risk
T1_TTAGTTCGTTTGACTG	Background
T1_TTATGCTGTAGCGATG	Background
T1_TTCCCAGAGGAATTAC	High-Risk
T1_TTCCCAGTCCTAGTGA	Background
T1_TTCGAAGAGACAATAC	Background
T1_TTCGAAGCAACTGGCC	Background
T1_TTCGAAGCAATGAAAC	Background
T1_TTCGGTCGTGACTCAT	Background
T1_TTCGGTCGTTATCGGT	Background
T1_TTCTACAGTAGCTCCG	Background
T1_TTCTCAAAGACTGTAA	Background
T1_TTCTCAACATCCGTGG	Background
T1_TTCTCAAGTAGCTGCC	High-Risk
T1_TTCTCAAGTTCCGTCT	Background
T1_TTCTCAATCGCCAAAT	Background
T1_TTCTCAATCGGCCGAT	High-Risk
T1_TTCTCCTAGATGCGAC	High-Risk
T1_TTCTCCTGTAAGAGAG	Background
T1_TTCTCCTGTATGGTTC	Background
T1_TTCTCCTGTCACCCAG	Background
T1_TTCTCCTTCTACTCAT	Background
T1_TTCTTAGAGTGGGATC	Background
T1_TTCTTAGTCAGAGACG	Background
T1_TTGCCGTGTTCCACAA	Background
T1_TTGCCGTGTTCCACGG	Background
T1_TTGCGTCAGCAACGGT	Background
T1_TTGCGTCGTCTTCTCG	Background
T1_TTGCGTCGTTCGGGCT	Background
T1_TTGCGTCTCAGCCTAA	High-Risk
T1_TTGGAACAGGCTATCT	Background
T1_TTGGAACGTAGTACCT	Background
T1_TTGGAACTCATATCGG	High-Risk
T1_TTGGAACTCCCAACGG	Background
T1_TTGGCAAAGTACGCGA	Background
T1_TTGGCAACAGCATGAG	Background
T1_TTGGCAAGTCATCCCT	Background
T1_TTGGCAATCGTAGGTT	High-Risk
T1_TTGTAGGAGTCGAGTG	High-Risk
T1_TTGTAGGAGTGGAGAA	Background
T1_TTGTAGGGTGCAACGA	Background
T1_TTTACTGCATGAAGTA	High-Risk
T1_TTTACTGGTGCCTGGT	Background
T1_TTTACTGGTTGATTCG	Background
T1_TTTACTGTCACTATTC	High-Risk
T1_TTTACTGTCGTGGTCG	Background
T1_TTTATGCTCCAGAAGG	High-Risk
T1_TTTATGCTCTTACCGC	Background
T1_TTTGCGCCAGTCCTTC	High-Risk
T1_TTTGCGCGTGATAAAC	Background
T1_TTTGGTTAGCCACCTG	Background
T1_TTTGGTTCAAATACAG	Background
T1_TTTGGTTGTTTGGCGC	Background
T1_TTTGTCAAGGGTTCCC	Background
T1_TTTGTCATCCTTTCGG	Background
T1_TTTGTCATCTAAGCCA	Background
T2_AAACCTGCACCACGTG	Background
T2_AAACCTGCAGGGTACA	Background
T2_AAACCTGCAGGGTTAG	Background
T2_AAACCTGCATGGGACA	Background
T2_AAACCTGGTCAAGCGA	Background
T2_AAACCTGGTTCGAATC	Background
T2_AAACCTGTCTCATTCA	High-Risk
T2_AAACGGGAGGTGACCA	Background
T2_AAACGGGCAGTCTTCC	High-Risk
T2_AAACGGGGTCCATCCT	Background
T2_AAACGGGTCATTGCCC	High-Risk
T2_AAACGGGTCGGTGTTA	Background
T2_AAACGGGTCTGCTGCT	Background
T2_AAAGATGAGCTGATAA	Background
T2_AAAGATGAGCTTCGCG	Background
T2_AAAGATGGTCGTGGCT	Background
T2_AAAGATGGTGGTAACG	High-Risk
T2_AAAGATGTCACTTATC	High-Risk
T2_AAAGATGTCCTAGTGA	Background
T2_AAAGATGTCTATCCCG	Background
T2_AAAGCAAAGCACACAG	Background
T2_AAAGCAAAGCGATAGC	Background
T2_AAAGCAACAAGGACAC	Background
T2_AAAGCAACACAGGCCT	Background
T2_AAAGCAACACGGTGTC	High-Risk
T2_AAAGCAACAGATGAGC	Background
T2_AAAGCAACAGTGGAGT	High-Risk
T2_AAAGCAAGTTTGTTTC	Background
T2_AAAGCAATCGCAAACT	Background
T2_AAAGCAATCTAGAGTC	High-Risk
T2_AAAGTAGAGCGTGTCC	Background
T2_AAAGTAGCAATCTACG	Background
T2_AAAGTAGGTCAATACC	Background
T2_AAAGTAGGTCAGAGGT	Background
T2_AAATGCCAGACACGAC	Background
T2_AAATGCCAGATGCGAC	High-Risk
T2_AAATGCCAGCACGCCT	Background
T2_AAATGCCAGTGACATA	Background
T2_AAATGCCCAAGCCGCT	Background
T2_AAATGCCCATGCAATC	Background
T2_AAATGCCTCGGTCCGA	Background
T2_AACACGTAGAGTACAT	High-Risk
T2_AACACGTAGTGTTAGA	Background
T2_AACACGTCACAGCCCA	High-Risk
T2_AACACGTTCCTGTAGA	Background
T2_AACACGTTCTCTAAGG	Background
T2_AACACGTTCTTAGAGC	Background
T2_AACCATGAGCTGTCTA	High-Risk
T2_AACCATGAGGTAGCTG	Background
T2_AACCATGCATTTCACT	High-Risk
T2_AACCATGGTAGCCTCG	High-Risk
T2_AACCATGGTCACCCAG	Background
T2_AACCATGGTTGGACCC	Background
T2_AACCATGTCCACGTTC	Background
T2_AACCATGTCCCGACTT	High-Risk
T2_AACCGCGCACGTGAGA	High-Risk
T2_AACCGCGTCAGTTTGG	High-Risk
T2_AACCGCGTCCGCATAA	Background
T2_AACCGCGTCGAGAGCA	Background
T2_AACCGCGTCTGCGTAA	Background
T2_AACGTTGAGACCTAGG	Background
T2_AACGTTGCATCGGAAG	High-Risk
T2_AACGTTGCATGGTCAT	High-Risk
T2_AACGTTGGTCAGAATA	High-Risk
T2_AACGTTGTCGTACCGG	Background
T2_AACGTTGTCTGATTCT	Background
T2_AACTCAGAGAAGAAGC	High-Risk
T2_AACTCAGAGATAGCAT	Background
T2_AACTCAGGTAAACACA	Background
T2_AACTCAGGTCTTGTCC	High-Risk
T2_AACTCAGGTTCCACAA	Background
T2_AACTCAGTCGCCTGAG	Background
T2_AACTCCCAGAGGGATA	Background
T2_AACTCCCGTCATCCCT	Background
T2_AACTCTTCAAGTACCT	Background
T2_AACTCTTCAAGTCTGT	High-Risk
T2_AACTCTTCATTGTGCA	High-Risk
T2_AACTCTTGTATCACCA	High-Risk
T2_AACTCTTTCCTCGCAT	Background
T2_AACTGGTAGAGTACCG	Background
T2_AACTGGTCAAGCCTAT	Background
T2_AACTGGTGTTCGGCAC	Background
T2_AACTGGTTCATAGCAC	Background
T2_AACTGGTTCTTTAGGG	Background
T2_AACTTTCCAAGAGGCT	Background
T2_AACTTTCCACGGTAAG	High-Risk
T2_AACTTTCCAGGGTTAG	Background
T2_AACTTTCTCGGTTCGG	High-Risk
T2_AACTTTCTCTCAAGTG	Background
T2_AAGACCTAGAGAGCTC	Background
T2_AAGACCTAGTAGTGCG	Background
T2_AAGACCTCAACTGCGC	Background
T2_AAGACCTCACATGGGA	High-Risk
T2_AAGACCTCACTTCTGC	Background
T2_AAGACCTCAGCGTTCG	High-Risk
T2_AAGACCTGTTCGCTAA	Background
T2_AAGACCTTCATGTAGC	Background
T2_AAGACCTTCCTAGAAC	Background
T2_AAGCCGCAGCTAGTTC	Background
T2_AAGCCGCCATGACGGA	High-Risk
T2_AAGCCGCGTGTCAATC	Background
T2_AAGCCGCGTTTAGCTG	High-Risk
T2_AAGCCGCTCACCGTAA	High-Risk
T2_AAGCCGCTCTGAAAGA	Background
T2_AAGGAGCAGCCTCGTG	High-Risk
T2_AAGGAGCCATAGTAAG	High-Risk
T2_AAGGAGCGTATTCGTG	Background
T2_AAGGAGCGTCTACCTC	Background
T2_AAGGAGCGTGCGAAAC	Background
T2_AAGGAGCGTTCAGTAC	High-Risk
T2_AAGGAGCTCCTGCTTG	Background
T2_AAGGAGCTCTTAACCT	Background
T2_AAGGCAGCAGGGAGAG	Background
T2_AAGGCAGGTCCGCTGA	Background
T2_AAGGCAGGTTTGTTGG	Background
T2_AAGGCAGTCCCATTTA	High-Risk
T2_AAGGTTCAGATCGATA	High-Risk
T2_AAGGTTCAGCTGAAAT	Background
T2_AAGGTTCAGGCTCAGA	Background
T2_AAGGTTCAGTGGAGTC	Background
T2_AAGGTTCGTGTGACGA	High-Risk
T2_AAGGTTCGTTGCGCAC	Background
T2_AAGGTTCTCGATCCCT	Background
T2_AAGTCTGCAGGTCGTC	Background
T2_AAGTCTGGTAAACGCG	Background
T2_AAGTCTGGTACCATCA	High-Risk
T2_AAGTCTGGTCGGCTCA	Background
T2_AAGTCTGTCGCATGAT	Background
T2_AAGTCTGTCTCAACTT	High-Risk
T2_AATCCAGAGAGACTAT	Background
T2_AATCCAGCAGTAAGAT	Background
T2_AATCCAGGTTAAAGAC	High-Risk
T2_AATCCAGGTTGTGGCC	Background
T2_AATCCAGGTTTGTTTC	Background
T2_AATCGGTAGCCACTAT	High-Risk
T2_AATCGGTAGTTAGCGG	Background
T2_AATCGGTCACTATCTT	High-Risk
T2_AATCGGTGTTAAGTAG	Background
T2_AATCGGTGTTAGATGA	Background
T2_AATCGGTGTTCAGCGC	High-Risk
T2_AATCGGTTCAGAGACG	High-Risk
T2_AATCGGTTCGAGAACG	High-Risk
T2_ACACCAAAGCGACGTA	Background
T2_ACACCAAAGCGATTCT	High-Risk
T2_ACACCAACACGGCCAT	High-Risk
T2_ACACCAAGTAGGCTGA	Background
T2_ACACCAAGTCCAGTAT	Background
T2_ACACCAAGTCGTTGTA	Background
T2_ACACCAATCTGGTATG	High-Risk
T2_ACACCCTAGCTGTCTA	Background
T2_ACACCCTCAACAACCT	Background
T2_ACACCCTCACAAGTAA	Background
T2_ACACCCTGTCGCGTGT	High-Risk
T2_ACACCCTGTGTGTGCC	High-Risk
T2_ACACCCTGTGTTCTTT	Background
T2_ACACCCTTCACCAGGC	High-Risk
T2_ACACCCTTCGAACTGT	Background
T2_ACACCCTTCTCTGTCG	High-Risk
T2_ACACCGGCAAAGGAAG	Background
T2_ACACCGGCAAGGCTCC	High-Risk
T2_ACACCGGCATAAGACA	High-Risk
T2_ACACCGGGTGGTACAG	Background
T2_ACACCGGGTTGGTGGA	Background
T2_ACACTGAAGACCACGA	Background
T2_ACACTGAAGACTGGGT	Background
T2_ACACTGAAGCTATGCT	Background
T2_ACACTGACACTTCTGC	Background
T2_ACACTGAGTCTTTCAT	Background
T2_ACACTGATCCCTTGCA	Background
T2_ACACTGATCCGTAGGC	Background
T2_ACACTGATCCTTTCTC	Background
T2_ACAGCCGAGACTAGGC	Background
T2_ACAGCCGAGAGGTACC	Background
T2_ACAGCCGAGCAGGTCA	Background
T2_ACAGCCGAGGGATCTG	High-Risk
T2_ACAGCCGCACGGCGTT	High-Risk
T2_ACAGCCGCATACTACG	Background
T2_ACAGCCGTCAACGCTA	High-Risk
T2_ACAGCTACACAACTGT	High-Risk
T2_ACAGCTACATTTGCTT	High-Risk
T2_ACAGCTAGTCGTGGCT	High-Risk
T2_ACAGCTAGTTTAGGAA	Background
T2_ACAGCTATCAAGCCTA	Background
T2_ACAGCTATCTCATTCA	Background
T2_ACAGCTATCTTTACGT	Background
T2_ACATACGAGAGCTTCT	High-Risk
T2_ACATACGAGAGGTTGC	Background
T2_ACATACGAGGATGGTC	Background
T2_ACATACGCACAGATTC	Background
T2_ACATACGCAGCTTCGG	Background
T2_ACATACGGTTGACGTT	High-Risk
T2_ACATCAGAGACTTTCG	Background
T2_ACATCAGAGCCACTAT	High-Risk
T2_ACATCAGAGGGTCTCC	Background
T2_ACATCAGGTTCAGTAC	Background
T2_ACATCAGGTTGGTGGA	High-Risk
T2_ACATCAGTCCAAATGC	High-Risk
T2_ACATGGTAGTGCAAGC	Background
T2_ACATGGTCATCACCCT	High-Risk
T2_ACATGGTGTAAACCTC	Background
T2_ACATGGTGTCGAATCT	Background
T2_ACATGGTGTCTGCAAT	Background
T2_ACATGGTGTGCTTCTC	Background
T2_ACATGGTTCAACACAC	High-Risk
T2_ACATGGTTCAGGCCCA	Background
T2_ACCAGTAAGAGCCCAA	Background
T2_ACCAGTAAGTAGCCGA	Background
T2_ACCAGTACAAGCTGAG	High-Risk
T2_ACCAGTACACAGGAGT	Background
T2_ACCAGTAGTCATTAGC	High-Risk
T2_ACCAGTAGTCGTGGCT	High-Risk
T2_ACCAGTAGTTCACGGC	Background
T2_ACCAGTAGTTCATGGT	Background
T2_ACCAGTATCAGCATGT	Background
T2_ACCAGTATCCGTACAA	High-Risk
T2_ACCAGTATCGACCAGC	Background
T2_ACCCACTAGAACTGTA	Background
T2_ACCCACTAGATCCCAT	Background
T2_ACCCACTAGCTCTCGG	Background
T2_ACCCACTCAAAGCAAT	Background
T2_ACCCACTCACATTAGC	Background
T2_ACCCACTCAGACACTT	High-Risk
T2_ACCCACTCAGATAATG	Background
T2_ACCCACTCAGCTGCAC	High-Risk
T2_ACCCACTCATAAGACA	Background
T2_ACCCACTTCGCATGAT	Background
T2_ACCGTAACACCCATGG	Background
T2_ACCGTAACACGTGAGA	Background
T2_ACCGTAAGTGTTCGAT	Background
T2_ACCGTAAGTGTTTGGT	Background
T2_ACCGTAATCAAAGACA	Background
T2_ACCGTAATCAACTCTT	Background
T2_ACCGTAATCGTTTAGG	Background
T2_ACCTTTACAGACGCCT	Background
T2_ACCTTTACAGCTTCGG	Background
T2_ACCTTTATCGCGCCAA	Background
T2_ACGAGCCAGGAGTACC	Background
T2_ACGAGCCAGTACTTGC	High-Risk
T2_ACGAGCCAGTGAATTG	Background
T2_ACGAGCCAGTGTACGG	Background
T2_ACGAGCCCAAGTCTAC	High-Risk
T2_ACGAGCCTCTTAACCT	Background
T2_ACGAGGAAGCTATGCT	High-Risk
T2_ACGAGGAAGTAGCCGA	Background
T2_ACGAGGACACCACCAG	Background
T2_ACGAGGACAGGAATCG	High-Risk
T2_ACGAGGACATTGCGGC	Background
T2_ACGAGGAGTAGAGCTG	Background
T2_ACGATACAGACCGGAT	High-Risk
T2_ACGATACAGAGCTGGT	Background
T2_ACGATACAGATGAGAG	Background
T2_ACGATACGTGAAGGCT	Background
T2_ACGATACTCTCTGTCG	High-Risk
T2_ACGATGTAGCCTATGT	Background
T2_ACGATGTGTCTAGGTT	Background
T2_ACGATGTGTGTATGGG	Background
T2_ACGATGTTCAACACAC	Background
T2_ACGATGTTCTCGCATC	High-Risk
T2_ACGCAGCAGATCCTGT	Background
T2_ACGCAGCAGTGGTCCC	Background
T2_ACGCAGCCAAGCTGAG	High-Risk
T2_ACGCAGCGTAGTACCT	Background
T2_ACGCAGCGTGCGCTTG	Background
T2_ACGCAGCTCCGCATCT	High-Risk
T2_ACGCAGCTCTTGTCAT	High-Risk
T2_ACGCCAGAGGCTCAGA	Background
T2_ACGCCAGGTTTCGCTC	Background
T2_ACGCCAGTCACCGTAA	Background
T2_ACGCCGAAGCTAGCCC	High-Risk
T2_ACGCCGACACAGGAGT	Background
T2_ACGCCGAGTAAATACG	High-Risk
T2_ACGCCGATCAGGCAAG	Background
T2_ACGCCGATCTGATACG	Background
T2_ACGGAGAAGGCACATG	Background
T2_ACGGAGAAGTGAAGAG	High-Risk
T2_ACGGAGAGTAACGCGA	High-Risk
T2_ACGGAGAGTTGCTCCT	Background
T2_ACGGAGATCCTGCCAT	High-Risk
T2_ACGGAGATCTCGCATC	Background
T2_ACGGCCAAGATTACCC	Background
T2_ACGGCCAAGGCCATAG	Background
T2_ACGGCCAAGTACTTGC	Background
T2_ACGGCCAAGTAGGCCA	Background
T2_ACGGCCACACCATGTA	Background
T2_ACGGCCACACGCCAGT	High-Risk
T2_ACGGCCATCGGCGCTA	High-Risk
T2_ACGGGCTAGCTTTGGT	Background
T2_ACGGGCTAGGTGCAAC	Background
T2_ACGGGCTAGTTGAGAT	High-Risk
T2_ACGGGCTCATGTCTCC	High-Risk
T2_ACGGGCTGTACAGTTC	High-Risk
T2_ACGGGCTTCTCAAGTG	Background
T2_ACGGGTCAGCGAGAAA	Background
T2_ACGGGTCCAAGCGTAG	Background
T2_ACGGGTCGTGCTTCTC	Background
T2_ACGGGTCTCCTGCCAT	Background
T2_ACGTCAAAGATCTGCT	Background
T2_ACGTCAAAGGCGCTCT	Background
T2_ACGTCAAAGTTGAGAT	High-Risk
T2_ACGTCAACAGAGTGTG	Background
T2_ACGTCAACAGCTCGCA	High-Risk
T2_ACGTCAAGTCAAAGAT	High-Risk
T2_ACGTCAATCAGCTCGG	Background
T2_ACGTCAATCCGCGCAA	Background
T2_ACGTCAATCGCACTCT	High-Risk
T2_ACGTCAATCGGTGTTA	Background
T2_ACGTCAATCTAAGCCA	Background
T2_ACTATCTAGTTAGGTA	Background
T2_ACTATCTCATAGTAAG	High-Risk
T2_ACTATCTGTCTCCATC	High-Risk
T2_ACTATCTTCAGTTCGA	High-Risk
T2_ACTATCTTCTTGAGGT	Background
T2_ACTGAACAGATCCCGC	Background
T2_ACTGAACAGCAGCGTA	High-Risk
T2_ACTGAACCACTTAACG	Background
T2_ACTGAACTCTGCGGCA	Background
T2_ACTGAACTCTTTAGTC	Background
T2_ACTGAGTAGAGCTGCA	Background
T2_ACTGAGTAGCACAGGT	Background
T2_ACTGAGTAGCAGACTG	Background
T2_ACTGAGTAGTGTACGG	Background
T2_ACTGAGTCACCAGATT	Background
T2_ACTGAGTGTCTTTCAT	High-Risk
T2_ACTGAGTGTGTAATGA	High-Risk
T2_ACTGAGTTCAACACGT	Background
T2_ACTGAGTTCAATCACG	Background
T2_ACTGAGTTCCACTCCA	Background
T2_ACTGAGTTCCTCGCAT	Background
T2_ACTGAGTTCGTGACAT	Background
T2_ACTGATGAGACAATAC	Background
T2_ACTGATGAGAGCTGCA	Background
T2_ACTGATGAGTAGATGT	Background
T2_ACTGATGAGTGTCCAT	Background
T2_ACTGATGAGTGTGAAT	High-Risk
T2_ACTGATGCATAAAGGT	Background
T2_ACTGATGCATGCGCAC	Background
T2_ACTGATGCATGTAGTC	Background
T2_ACTGATGGTCGGCATC	Background
T2_ACTGATGGTTCGTCTC	High-Risk
T2_ACTGATGTCTTGAGAC	High-Risk
T2_ACTGCTCAGCACACAG	Background
T2_ACTGCTCAGCGTCTAT	High-Risk
T2_ACTGCTCAGCTCAACT	Background
T2_ACTGCTCCAGCGTCCA	Background
T2_ACTGCTCTCTGCGGCA	Background
T2_ACTGTCCAGTTTGCGT	Background
T2_ACTGTCCCATGACGGA	Background
T2_ACTGTCCCATGCCTAA	Background
T2_ACTGTCCTCCTCGCAT	Background
T2_ACTGTCCTCTTCGAGA	High-Risk
T2_ACTTACTAGGCTCTTA	Background
T2_ACTTACTCAGCTATTG	Background
T2_ACTTACTTCCATGAAC	Background
T2_ACTTACTTCTGATACG	Background
T2_ACTTGTTAGATGCCTT	Background
T2_ACTTGTTAGGATTCGG	Background
T2_ACTTGTTCAAACTGTC	Background
T2_ACTTGTTCAGCCAATT	Background
T2_ACTTGTTCAGTCTTCC	High-Risk
T2_ACTTGTTGTAGTACCT	High-Risk
T2_ACTTGTTGTATCTGCA	Background
T2_ACTTGTTGTGATGTCT	Background
T2_ACTTGTTTCATGCAAC	Background
T2_ACTTGTTTCGGTGTTA	High-Risk
T2_ACTTTCAAGAGTACCG	High-Risk
T2_ACTTTCAAGTAATCCC	Background
T2_ACTTTCACACGTCAGC	Background
T2_ACTTTCATCAGTTTGG	Background
T2_ACTTTCATCCACTCCA	Background
T2_ACTTTCATCCGTTGCT	Background
T2_AGAATAGAGGGTCTCC	Background
T2_AGAATAGTCAGGTAAA	Background
T2_AGAATAGTCCGGCACA	Background
T2_AGAATAGTCGTTGCCT	Background
T2_AGAATAGTCTCATTCA	Background
T2_AGACGTTAGACTTTCG	Background
T2_AGACGTTGTAAATGTG	Background
T2_AGACGTTTCCGTACAA	Background
T2_AGACGTTTCTTCGGTC	Background
T2_AGAGCGAAGACAAAGG	Background
T2_AGAGCGAAGACGCAAC	Background
T2_AGAGCGAAGGGATGGG	Background
T2_AGAGCGACAGCTGGCT	Background
T2_AGAGCGAGTTCCACTC	Background
T2_AGAGCTTCACGTGAGA	Background
T2_AGAGCTTCATCGGGTC	High-Risk
T2_AGAGCTTGTAAACCTC	Background
T2_AGAGCTTTCCTTCAAT	High-Risk
T2_AGAGCTTTCTTCGAGA	Background
T2_AGAGTGGCACTGCCAG	High-Risk
T2_AGAGTGGCAGATTGCT	Background
T2_AGAGTGGGTCATCGGC	High-Risk
T2_AGAGTGGTCAATAAGG	Background
T2_AGATCTGAGAGATGAG	High-Risk
T2_AGATCTGAGCGCCTTG	Background
T2_AGATCTGAGTACATGA	Background
T2_AGATCTGCATTCACTT	Background
T2_AGATCTGGTAATTGGA	Background
T2_AGATCTGGTATCTGCA	Background
T2_AGATCTGTCGATGAGG	Background
T2_AGATTGCAGGGAACGG	Background
T2_AGATTGCCACTGAAGG	Background
T2_AGATTGCCAGCTGCAC	Background
T2_AGATTGCGTCATACTG	High-Risk
T2_AGCAGCCAGTACGTTC	Background
T2_AGCAGCCGTCCGAAGA	High-Risk
T2_AGCATACAGATCCGAG	Background
T2_AGCATACAGCTGTTCA	High-Risk
T2_AGCATACCAGGCAGTA	Background
T2_AGCATACCATTAACCG	High-Risk
T2_AGCATACGTCGCTTTC	High-Risk
T2_AGCATACGTGCACGAA	Background
T2_AGCATACGTTAGATGA	High-Risk
T2_AGCATACGTTATCACG	High-Risk
T2_AGCATACTCTGGTTCC	Background
T2_AGCCTAAAGCTGAAAT	Background
T2_AGCCTAACACAGCGTC	Background
T2_AGCCTAACAGCCACCA	Background
T2_AGCCTAACAGCTTAAC	Background
T2_AGCCTAAGTACTTCTT	Background
T2_AGCGGTCCACAACGCC	High-Risk
T2_AGCGGTCTCACCCGAG	Background
T2_AGCGGTCTCCGTACAA	Background
T2_AGCGGTCTCCTAGTGA	High-Risk
T2_AGCGGTCTCTCGATGA	Background
T2_AGCGTATAGCTAGTCT	High-Risk
T2_AGCGTATCAAGAGGCT	Background
T2_AGCGTATCATTCCTGC	High-Risk
T2_AGCGTATGTATGAAAC	High-Risk
T2_AGCGTATGTCGTCTTC	High-Risk
T2_AGCGTATGTCTAGCGC	Background
T2_AGCGTCGAGATGAGAG	Background
T2_AGCGTCGAGCCAGAAC	Background
T2_AGCGTCGAGTGAACGC	Background
T2_AGCGTCGTCACGAAGG	Background
T2_AGCGTCGTCCAGGGCT	Background
T2_AGCGTCGTCTACTATC	Background
T2_AGCTCCTAGAGTTGGC	High-Risk
T2_AGCTCCTGTTATGCGT	Background
T2_AGCTCCTGTTGCTCCT	Background
T2_AGCTCCTGTTGGTGGA	Background
T2_AGCTCCTTCTGACCTC	High-Risk
T2_AGCTCTCAGCCAGTAG	High-Risk
T2_AGCTCTCAGGGTGTGT	Background
T2_AGCTCTCGTAAGGATT	Background
T2_AGCTCTCGTCTCATCC	High-Risk
T2_AGCTCTCTCACTTACT	High-Risk
T2_AGCTCTCTCCACGAAT	Background
T2_AGCTCTCTCTGCTGCT	Background
T2_AGCTTGAAGGCAATTA	Background
T2_AGCTTGACAATACGCT	Background
T2_AGCTTGACATGAAGTA	Background
T2_AGCTTGAGTGGAAAGA	Background
T2_AGCTTGATCCGAGCCA	Background
T2_AGGCCACAGCCGGTAA	Background
T2_AGGCCACAGTAATCCC	Background
T2_AGGCCACCACGGTTTA	Background
T2_AGGCCACCACTCTGTC	Background
T2_AGGCCACGTAAGGGAA	Background
T2_AGGCCACGTCCGTTAA	High-Risk
T2_AGGCCACTCATCTGTT	Background
T2_AGGCCACTCGTAGGAG	Background
T2_AGGCCGTTCGGACAAG	High-Risk
T2_AGGCCGTTCTCGCTTG	High-Risk
T2_AGGGAGTAGGCTCAGA	High-Risk
T2_AGGGAGTAGTCCGGTC	Background
T2_AGGGAGTGTGGCCCTA	Background
T2_AGGGAGTTCTATCCTA	Background
T2_AGGGAGTTCTCGGACG	High-Risk
T2_AGGGATGCAAGCTGTT	Background
T2_AGGGATGCAGTATCTG	High-Risk
T2_AGGGATGGTACAGACG	Background
T2_AGGGATGGTAGCCTCG	Background
T2_AGGGATGGTCATTAGC	Background
T2_AGGGATGTCCAAATGC	High-Risk
T2_AGGGTGAAGCTACCGC	Background
T2_AGGGTGACACCCTATC	Background
T2_AGGGTGACACTCTGTC	Background
T2_AGGGTGACATCTATGG	Background
T2_AGGGTGAGTCTAGCCG	Background
T2_AGGGTGAGTCTAGCGC	Background
T2_AGGGTGATCCAGTATG	High-Risk
T2_AGGTCATAGAATTCCC	High-Risk
T2_AGGTCATCACCGATAT	Background
T2_AGGTCATCAGTTTACG	High-Risk
T2_AGGTCATGTACCCAAT	Background
T2_AGGTCATGTCCTCCAT	Background
T2_AGGTCATGTGTTTGTG	High-Risk
T2_AGGTCATTCCTTGGTC	High-Risk
T2_AGGTCATTCTTGAGAC	Background
T2_AGGTCATTCTTTACGT	Background
T2_AGGTCCGAGCATGGCA	Background
T2_AGGTCCGAGTGGGATC	Background
T2_AGGTCCGCAAGAAGAG	Background
T2_AGGTCCGCAGCGATCC	Background
T2_AGGTCCGCAGGTTTCA	Background
T2_AGGTCCGGTCGGCATC	Background
T2_AGGTCCGGTGCAACGA	Background
T2_AGGTCCGGTGCTGTAT	Background
T2_AGGTCCGGTTGAACTC	Background
T2_AGGTCCGTCACTCTTA	High-Risk
T2_AGTAGTCAGGCAGGTT	Background
T2_AGTAGTCGTCTACCTC	Background
T2_AGTAGTCTCAAACCAC	High-Risk
T2_AGTAGTCTCTATCCCG	Background
T2_AGTAGTCTCTCGCTTG	Background
T2_AGTCTTTCACCTCGGA	Background
T2_AGTCTTTCAGTTCCCT	Background
T2_AGTCTTTTCTCTGAGA	High-Risk
T2_AGTGAGGAGGGTGTGT	High-Risk
T2_AGTGAGGAGGTGTTAA	High-Risk
T2_AGTGAGGCACCACGTG	Background
T2_AGTGAGGGTATAGGTA	High-Risk
T2_AGTGAGGGTTATCACG	Background
T2_AGTGAGGTCGAATCCA	Background
T2_AGTGGGAAGAGTGAGA	Background
T2_AGTGGGAAGCAACGGT	Background
T2_AGTGGGAAGCAGCGTA	Background
T2_AGTGGGAAGGCAAAGA	High-Risk
T2_AGTGGGACACAACGTT	Background
T2_AGTGGGACACGAAAGC	High-Risk
T2_AGTGGGACACGGCGTT	High-Risk
T2_AGTGGGACAGAGCCAA	High-Risk
T2_AGTGGGACAGCTATTG	Background
T2_AGTGGGATCCTCCTAG	Background
T2_AGTGTCAAGGAATCGC	Background
T2_AGTGTCAAGGACGAAA	Background
T2_AGTGTCAGTGATGTCT	High-Risk
T2_AGTGTCATCCAGAGGA	High-Risk
T2_AGTGTCATCGAGCCCA	Background
T2_AGTTGGTAGAAGATTC	High-Risk
T2_AGTTGGTCACAAGACG	Background
T2_AGTTGGTCATCCTTGC	High-Risk
T2_AGTTGGTGTCCCGACA	Background
T2_AGTTGGTGTGCCTTGG	Background
T2_AGTTGGTTCGGAATCT	Background
T2_AGTTGGTTCGGACAAG	Background
T2_AGTTGGTTCTATCCCG	Background
T2_ATAACGCAGAATGTGT	High-Risk
T2_ATAACGCAGCGTAGTG	Background
T2_ATAACGCAGCTCAACT	Background
T2_ATAACGCGTAGCAAAT	High-Risk
T2_ATAACGCTCGCAAGCC	Background
T2_ATAAGAGAGTTGTCGT	Background
T2_ATAAGAGCATCTATGG	High-Risk
T2_ATAAGAGGTCCAGTTA	Background
T2_ATAAGAGGTCCGTTAA	High-Risk
T2_ATAAGAGGTGAAATCA	Background
T2_ATAGACCAGCCACTAT	Background
T2_ATAGACCAGGGCTTCC	Background
T2_ATAGACCTCAACGAAA	Background
T2_ATCACGAAGAAGGGTA	High-Risk
T2_ATCACGACAGCGAACA	Background
T2_ATCACGACAGGCGATA	Background
T2_ATCACGAGTGCAGTAG	High-Risk
T2_ATCACGAGTTCAGTAC	Background
T2_ATCACGAGTTCATGGT	Background
T2_ATCACGATCTACCAGA	Background
T2_ATCACGATCTTGTACT	High-Risk
T2_ATCATCTAGTACCGGA	Background
T2_ATCATCTAGTAGCCGA	Background
T2_ATCATCTCACTTAACG	Background
T2_ATCATCTGTCACCTAA	Background
T2_ATCATCTTCTTCGAGA	Background
T2_ATCATGGAGACAGGCT	High-Risk
T2_ATCATGGAGTGGACGT	Background
T2_ATCATGGCACGAAAGC	Background
T2_ATCATGGGTCATGCCG	High-Risk
T2_ATCATGGTCACTGGGC	Background
T2_ATCATGGTCTCTGCTG	Background
T2_ATCCACCGTCCCTTGT	Background
T2_ATCCACCGTCGCCATG	Background
T2_ATCCACCTCTTGACGA	High-Risk
T2_ATCCGAAAGGCTCATT	Background
T2_ATCCGAACATGTCTCC	Background
T2_ATCCGAAGTTGGTAAA	Background
T2_ATCCGAATCACAAACC	Background
T2_ATCCGAATCATTTGGG	Background
T2_ATCCGAATCGCAGGCT	Background
T2_ATCGAGTAGAACAATC	Background
T2_ATCGAGTGTGGCGAAT	Background
T2_ATCGAGTTCAGTTAGC	Background
T2_ATCGAGTTCGCTGATA	High-Risk
T2_ATCTACTAGAATCTCC	Background
T2_ATCTACTAGACAGACC	Background
T2_ATCTACTAGGTGCACA	Background
T2_ATCTACTCACGTCTCT	Background
T2_ATCTACTCACGTGAGA	High-Risk
T2_ATCTACTCAGCAGTTT	Background
T2_ATCTACTTCGTTTGCC	High-Risk
T2_ATCTACTTCTTGCATT	Background
T2_ATCTGCCAGGACAGCT	High-Risk
T2_ATCTGCCAGGCGATAC	Background
T2_ATCTGCCAGGTGCTAG	Background
T2_ATCTGCCAGTATCGAA	Background
T2_ATCTGCCAGTCAATAG	Background
T2_ATCTGCCTCCACGCAG	Background
T2_ATCTGCCTCGACGGAA	High-Risk
T2_ATGAGGGCACTATCTT	High-Risk
T2_ATGAGGGCATAGTAAG	Background
T2_ATGAGGGTCTGTACGA	Background
T2_ATGAGGGTCTTCTGGC	Background
T2_ATGCGATAGGATATAC	Background
T2_ATGCGATGTACCGAGA	Background
T2_ATGCGATGTCCTCCAT	High-Risk
T2_ATGCGATGTCTTCTCG	Background
T2_ATGCGATGTGTGCCTG	Background
T2_ATGCGATGTTACGTCA	Background
T2_ATGCGATTCGGATGTT	Background
T2_ATGGGAGAGGACGAAA	Background
T2_ATGGGAGCATCACGAT	Background
T2_ATGGGAGGTCTCTTAT	Background
T2_ATGGGAGTCCCAACGG	Background
T2_ATGTGTGCACAAGCCC	Background
T2_ATGTGTGCAGCCACCA	Background
T2_ATGTGTGGTAAGTGTA	Background
T2_ATGTGTGGTTATGTGC	High-Risk
T2_ATGTGTGTCCCTCAGT	Background
T2_ATTACTCAGGCAAAGA	Background
T2_ATTACTCCAACACGCC	Background
T2_ATTACTCCACGTGAGA	Background
T2_ATTACTCGTATAGGGC	Background
T2_ATTACTCGTCTCATCC	Background
T2_ATTACTCTCAACCAAC	High-Risk
T2_ATTACTCTCGCTAGCG	High-Risk
T2_ATTATCCAGATCGATA	Background
T2_ATTATCCCAGATAATG	Background
T2_ATTATCCCATGCATGT	Background
T2_ATTATCCGTAAGGGCT	High-Risk
T2_ATTATCCGTATCACCA	High-Risk
T2_ATTATCCGTCTGCAAT	Background
T2_ATTATCCGTTGGGACA	Background
T2_ATTATCCTCTTAACCT	Background
T2_ATTCTACAGCTTATCG	Background
T2_ATTCTACAGGCCCTCA	Background
T2_ATTCTACAGTAATCCC	High-Risk
T2_ATTCTACTCAATCTCT	High-Risk
T2_ATTCTACTCCCAACGG	Background
T2_ATTCTACTCCTATGTT	Background
T2_ATTGGACAGGCCCTTG	Background
T2_ATTGGACCAAGGTTTC	Background
T2_ATTGGACCATTCTTAC	Background
T2_ATTGGTGCAGACAGGT	High-Risk
T2_ATTGGTGCATGCTAGT	Background
T2_ATTTCTGAGACAGACC	Background
T2_ATTTCTGCATCCGGGT	Background
T2_ATTTCTGGTGTGGCTC	High-Risk
T2_ATTTCTGTCACAGGCC	Background
T2_ATTTCTGTCGAATGGG	High-Risk
T2_ATTTCTGTCGCCTGTT	High-Risk
T2_CAACCAAAGATGCCAG	High-Risk
T2_CAACCAACATCCTTGC	Background
T2_CAACCAAGTCTAGCGC	Background
T2_CAACCAAGTTGAACTC	Background
T2_CAACCAATCAACACCA	High-Risk
T2_CAACCAATCCGCAGTG	High-Risk
T2_CAACCTCAGCACCGTC	Background
T2_CAACCTCAGGTACTCT	Background
T2_CAACCTCAGTCCTCCT	Background
T2_CAACCTCAGTCGTTTG	Background
T2_CAACCTCCAATGCCAT	Background
T2_CAACCTCGTTATTCTC	Background
T2_CAACTAGAGACGACGT	Background
T2_CAACTAGCAAAGGCGT	Background
T2_CAACTAGCAAGTTGTC	Background
T2_CAACTAGCAGACAAGC	Background
T2_CAACTAGCAGAGTGTG	High-Risk
T2_CAACTAGCATACCATG	Background
T2_CAACTAGCATTACGAC	High-Risk
T2_CAACTAGTCAGTCCCT	High-Risk
T2_CAAGAAAAGGAATGGA	Background
T2_CAAGAAAAGGGATCTG	High-Risk
T2_CAAGAAAAGTATTGGA	Background
T2_CAAGAAACAGTATGCT	Background
T2_CAAGAAAGTACTCGCG	Background
T2_CAAGATCAGCTCCTTC	High-Risk
T2_CAAGATCGTTGCTCCT	Background
T2_CAAGATCTCCAAGCCG	Background
T2_CAAGATCTCCGGCACA	Background
T2_CAAGGCCAGATCGGGT	High-Risk
T2_CAAGGCCAGTTGTCGT	Background
T2_CAAGGCCTCGGCTACG	Background
T2_CAAGTTGAGACGCACA	Background
T2_CAAGTTGCAAGCCTAT	Background
T2_CAAGTTGCATAGACTC	High-Risk
T2_CAAGTTGGTACCAGTT	Background
T2_CAAGTTGTCCAGAAGG	High-Risk
T2_CACAAACAGACCGGAT	Background
T2_CACAAACCAAGCGTAG	Background
T2_CACAAACTCAATCACG	Background
T2_CACAAACTCAGCAACT	Background
T2_CACACAACAGTAAGAT	Background
T2_CACACAAGTCACAAGG	Background
T2_CACACAAGTCCAGTTA	Background
T2_CACACAATCAGTGTTG	High-Risk
T2_CACACAATCATCGATG	Background
T2_CACACAATCGAATCCA	High-Risk
T2_CACACCTAGACAATAC	High-Risk
T2_CACACCTCAGCCACCA	Background
T2_CACACCTTCAACGCTA	High-Risk
T2_CACACCTTCTGATTCT	Background
T2_CACACTCAGCCACGTC	Background
T2_CACACTCAGCGATCCC	Background
T2_CACACTCCAGTATGCT	Background
T2_CACACTCCATGGGACA	Background
T2_CACACTCCATGTAAGA	High-Risk
T2_CACACTCGTATGAATG	Background
T2_CACACTCGTTCTGAAC	Background
T2_CACACTCTCACCACCT	High-Risk
T2_CACACTCTCGCGCCAA	Background
T2_CACACTCTCGTACCGG	Background
T2_CACACTCTCTCGCTTG	Background
T2_CACACTCTCTTATCTG	Background
T2_CACAGGCGTTGGAGGT	Background
T2_CACAGGCTCCAAGTAC	Background
T2_CACAGGCTCCCAGGTG	Background
T2_CACAGGCTCCTCTAGC	High-Risk
T2_CACAGTAAGTTTCCTT	Background
T2_CACAGTACATGCCACG	Background
T2_CACAGTAGTACTTGAC	Background
T2_CACATAGAGAAACCAT	Background
T2_CACATAGAGCAGACTG	Background
T2_CACATAGCAAGTTGTC	High-Risk
T2_CACATAGCACTACAGT	High-Risk
T2_CACATAGCAGTCAGAG	Background
T2_CACATAGGTCAACTGT	High-Risk
T2_CACATAGGTCTGCAAT	Background
T2_CACATAGTCAACCAAC	High-Risk
T2_CACATAGTCAATAAGG	Background
T2_CACATAGTCTGATTCT	Background
T2_CACATTTAGAGTAAGG	Background
T2_CACATTTAGCCGTCGT	Background
T2_CACATTTCAAACGTGG	Background
T2_CACATTTCACCACCAG	Background
T2_CACATTTCACCGATAT	High-Risk
T2_CACATTTCACGCGAAA	High-Risk
T2_CACATTTCATCGGACC	Background
T2_CACATTTTCTACGAGT	High-Risk
T2_CACATTTTCTGACCTC	Background
T2_CACCACTAGGATCGCA	Background
T2_CACCACTAGTCAATAG	Background
T2_CACCACTAGTCCATAC	High-Risk
T2_CACCACTCAGTCGTGC	Background
T2_CACCACTCATAGGATA	Background
T2_CACCACTCATCGGACC	High-Risk
T2_CACCACTCATGACGGA	Background
T2_CACCACTGTCCAACTA	High-Risk
T2_CACCACTGTTTAGGAA	Background
T2_CACCAGGCACGGTTTA	Background
T2_CACCAGGCATCTATGG	Background
T2_CACCAGGCATCTCCCA	Background
T2_CACCAGGGTCGACTGC	Background
T2_CACCAGGTCTCAAACG	Background
T2_CACCTTGAGTGTTAGA	High-Risk
T2_CACCTTGCACAAGCCC	Background
T2_CACCTTGCATCACCCT	Background
T2_CACCTTGGTAAACCTC	Background
T2_CACCTTGTCACGACTA	Background
T2_CACCTTGTCCCATTTA	High-Risk
T2_CACCTTGTCGATGAGG	Background
T2_CACTCCACAACAACCT	High-Risk
T2_CACTCCACAGGAATCG	Background
T2_CACTCCACAGTCAGCC	Background
T2_CACTCCAGTAGCCTAT	Background
T2_CACTCCAGTCCTGCTT	Background
T2_CACTCCAGTGTAAGTA	Background
T2_CAGAATCAGTCTCAAC	Background
T2_CAGAATCAGTGCCAGA	Background
T2_CAGAGAGAGACTGGGT	Background
T2_CAGAGAGCAACCGCCA	Background
T2_CAGAGAGCAGACACTT	Background
T2_CAGAGAGCAGACGCTC	Background
T2_CAGAGAGTCATTCACT	Background
T2_CAGATCAAGAATAGGG	Background
T2_CAGATCAAGATCCGAG	Background
T2_CAGATCAAGATCTGAA	Background
T2_CAGATCACATTCCTGC	High-Risk
T2_CAGATCAGTCCATGAT	Background
T2_CAGATCAGTCGACTGC	High-Risk
T2_CAGCAGCAGCCCTAAT	Background
T2_CAGCAGCCACGAAATA	Background
T2_CAGCAGCTCCTCTAGC	High-Risk
T2_CAGCAGCTCTCGCTTG	Background
T2_CAGCATAAGATCCTGT	Background
T2_CAGCATAAGCCTCGTG	Background
T2_CAGCATAGTGAAATCA	Background
T2_CAGCCGAAGAGTCGGT	Background
T2_CAGCCGACAGCTCCGA	Background
T2_CAGCCGACATATACCG	Background
T2_CAGCCGATCGTAGGAG	Background
T2_CAGCCGATCTCAACTT	High-Risk
T2_CAGCGACAGCTGGAAC	High-Risk
T2_CAGCGACTCCATGCTC	Background
T2_CAGCGACTCGTCTGAA	Background
T2_CAGCTAAAGTTACGGG	Background
T2_CAGCTAAAGTTTAGGA	High-Risk
T2_CAGCTAACAAGTAATG	Background
T2_CAGCTAACACCAGGCT	Background
T2_CAGCTAACACGTTGGC	Background
T2_CAGCTAACAGCGTAAG	Background
T2_CAGCTAATCAACACAC	High-Risk
T2_CAGCTAATCCAGAAGG	Background
T2_CAGCTAATCGCAGGCT	Background
T2_CAGCTAATCTTGTACT	Background
T2_CAGCTGGCATATGGTC	Background
T2_CAGCTGGGTTCACGGC	Background
T2_CAGCTGGTCCAAAGTC	Background
T2_CAGCTGGTCTGCAAGT	Background
T2_CAGGTGCAGCTAGTCT	Background
T2_CAGGTGCAGGAGCGAG	Background
T2_CAGGTGCAGTTCCACA	Background
T2_CAGGTGCCACATAACC	Background
T2_CAGGTGCCACATTAGC	Background
T2_CAGGTGCCACCGGAAA	High-Risk
T2_CAGGTGCCACGTCTCT	High-Risk
T2_CAGGTGCTCGAATGCT	Background
T2_CAGTAACAGTGCGTGA	Background
T2_CAGTAACAGTGCTGCC	Background
T2_CAGTAACAGTTATCGC	Background
T2_CAGTAACCACGGTAGA	High-Risk
T2_CAGTAACCAGATGAGC	Background
T2_CAGTAACCATGGTCAT	High-Risk
T2_CAGTAACGTTCCACTC	High-Risk
T2_CAGTAACTCAGGTAAA	High-Risk
T2_CAGTCCTGTGCCTGGT	Background
T2_CAGTCCTGTTGACGTT	Background
T2_CAGTCCTTCAACACGT	Background
T2_CAGTCCTTCCACGCAG	Background
[truncated: 39,987 more rows]

## Sheet: 3. scAB Cell Labels
Cell	Label
T1_AAACCTGAGATGTCGG	Background
T1_AAACGGGGTCATGCAT	Background
T1_AAAGATGCATGTTGAC	Background
T1_AAAGATGGTCGAGTTT	Background
T1_AAAGATGGTCTCTCTG	Background
T1_AAAGATGTCTTTACAC	Background
T1_AAAGCAAAGTGTACCT	Background
T1_AAAGCAATCACTTCAT	Background
T1_AAAGTAGAGTCGTACT	Background
T1_AAAGTAGCATTACGAC	Background
T1_AAATGCCAGAAACGCC	Background
T1_AACACGTAGAAGGTGA	Background
T1_AACACGTCAATGACCT	Background
T1_AACACGTGTCATATCG	Background
T1_AACACGTGTGCTGTAT	Background
T1_AACCATGCACAACTGT	Background
T1_AACCATGTCTGATTCT	Background
T1_AACCATGTCTGTCCGT	Background
T1_AACCGCGGTACTCGCG	Background
T1_AACCGCGTCGAATGGG	High-Risk
T1_AACGTTGCAATGGATA	Background
T1_AACGTTGGTACCCAAT	Background
T1_AACTCAGCAGCAGTTT	Background
T1_AACTCAGTCGTACCGG	Background
T1_AACTCCCCACATCTTT	Background
T1_AACTCCCCACGAAAGC	Background
T1_AACTCTTAGGTAAACT	Background
T1_AACTCTTAGTACCGGA	Background
T1_AACTGGTTCTAACGGT	High-Risk
T1_AACTTTCAGGATTCGG	Background
T1_AACTTTCCAAGAAGAG	Background
T1_AACTTTCCACACCGAC	Background
T1_AAGACCTAGGCGCTCT	High-Risk
T1_AAGACCTAGTCATGCT	Background
T1_AAGACCTGTCTGGTCG	Background
T1_AAGACCTTCATGTCCC	Background
T1_AAGCCGCAGCGATATA	Background
T1_AAGCCGCCAGTAAGAT	Background
T1_AAGCCGCGTAGGCATG	High-Risk
T1_AAGGAGCAGAGCTGCA	Background
T1_AAGGAGCAGTGGTAGC	Background
T1_AAGGAGCCAATTCCTT	Background
T1_AAGGAGCTCGTTGCCT	Background
T1_AAGGCAGAGTGGCACA	Background
T1_AAGGCAGTCTCTGTCG	Background
T1_AAGGTTCAGTATTGGA	Background
T1_AAGGTTCCATTCTTAC	Background
T1_AAGGTTCGTGTCAATC	Background
T1_AAGGTTCTCATAAAGG	Background
T1_AAGTCTGAGCAAATCA	Background
T1_AATCCAGTCTCCTATA	Background
T1_AATCGGTCAAGTTAAG	Background
T1_AATCGGTCACAGGCCT	Background
T1_ACACCAAAGAGACTTA	Background
T1_ACACCAACAATCCAAC	Background
T1_ACACCAACATGGGAAC	Background
T1_ACACCAAGTGAAAGAG	Background
T1_ACACCCTCAGACGTAG	Background
T1_ACACCGGAGTGCCATT	Background
T1_ACACCGGTCGCTTAGA	Background
T1_ACACTGAAGCATGGCA	Background
T1_ACACTGAAGTGTCCCG	Background
T1_ACACTGAGTCCTGCTT	Background
T1_ACACTGAGTTCAGACT	Background
T1_ACACTGAGTTCGAATC	Background
T1_ACACTGATCACTTCAT	Background
T1_ACAGCCGCATCGACGC	Background
T1_ACAGCCGTCAAGCCTA	Background
T1_ACAGCTACATTGGTAC	Background
T1_ACATACGAGACTCGGA	Background
T1_ACATACGCACGAAACG	Background
T1_ACATACGCAGGTCGTC	Background
T1_ACATACGCATCAGTCA	Background
T1_ACATACGTCAGCCTAA	High-Risk
T1_ACATCAGGTTAAGATG	High-Risk
T1_ACATGGTAGATGTCGG	Background
T1_ACATGGTAGTAGTGCG	Background
T1_ACATGGTCAGAGTGTG	Background
T1_ACATGGTTCTAACGGT	Background
T1_ACATGGTTCTCGCATC	Background
T1_ACCAGTAAGGCTCATT	Background
T1_ACCAGTAGTGCACCAC	Background
T1_ACCAGTATCACATACG	High-Risk
T1_ACCAGTATCCTACAGA	Background
T1_ACCAGTATCTTGCAAG	Background
T1_ACCCACTGTTATTCTC	Background
T1_ACCCACTTCTGCAGTA	Background
T1_ACCGTAATCATGGTCA	Background
T1_ACCTTTAGTTCACCTC	Background
T1_ACCTTTATCAGTTTGG	Background
T1_ACGAGCCGTCCAACTA	Background
T1_ACGAGGAAGCCACGTC	Background
T1_ACGAGGACACCCTATC	Background
T1_ACGAGGAGTATATCCG	Background
T1_ACGAGGATCAGCTGGC	Background
T1_ACGAGGATCGGAGCAA	Background
T1_ACGATACAGTACGTAA	Background
T1_ACGATGTAGGCTATCT	Background
T1_ACGATGTGTACCGTTA	High-Risk
T1_ACGATGTTCACGAAGG	Background
T1_ACGCAGCGTCTGATTG	High-Risk
T1_ACGCAGCTCAGTTGAC	Background
T1_ACGCCAGGTAGAGTGC	Background
T1_ACGCCAGGTCCGAGTC	Background
T1_ACGCCAGTCTTAGCCC	Background
T1_ACGCCGAGTACATGTC	Background
T1_ACGCCGAGTGCACCAC	Background
T1_ACGCCGATCGGATGTT	Background
T1_ACGGAGAAGCGATAGC	Background
T1_ACGGCCACAGTTAACC	Background
T1_ACGGCCAGTAAAGTCA	Background
T1_ACGGCCAGTCCTGCTT	Background
T1_ACGGCCATCAGCTGGC	Background
T1_ACGGGCTAGACAGACC	Background
T1_ACGGGCTCACTGTCGG	Background
T1_ACGGGCTCATCCGTGG	Background
T1_ACGGGTCCATGCGCAC	Background
T1_ACGGGTCTCGTTACGA	Background
T1_ACGTCAACAGGAATCG	Background
T1_ACGTCAATCAACCAAC	Background
T1_ACTATCTAGAACAATC	Background
T1_ACTATCTAGTGTTTGC	Background
T1_ACTATCTGTCTTTCAT	Background
T1_ACTATCTTCTCTGAGA	Background
T1_ACTATCTTCTTATCTG	Background
T1_ACTGAACTCAAAGTAG	Background
T1_ACTGAACTCCCAACGG	Background
T1_ACTGAGTAGTTCGATC	Background
T1_ACTGATGGTATTCTCT	Background
T1_ACTGCTCAGCGATCCC	Background
T1_ACTGCTCGTATAGGGC	Background
T1_ACTGCTCGTCTGATCA	Background
T1_ACTGTCCAGCGATGAC	Background
T1_ACTGTCCGTCAAACTC	Background
T1_ACTGTCCTCAAACAAG	Background
T1_ACTTACTAGAAGAAGC	Background
T1_ACTTACTAGATCGGGT	Background
T1_ACTTGTTGTCAAAGCG	Background
T1_ACTTGTTTCTTTACGT	Background
T1_AGAATAGAGAGCTGCA	Background
T1_AGAATAGGTCCTGCTT	Background
T1_AGAATAGGTGTGGTTT	Background
T1_AGACGTTAGGCGACAT	High-Risk
T1_AGAGCGAAGCGTCAAG	Background
T1_AGAGCGACAAACCCAT	Background
T1_AGAGCGAGTTCACGGC	Background
T1_AGAGTGGCAATCACAC	Background
T1_AGAGTGGCATCACGTA	Background
T1_AGAGTGGGTAAACGCG	Background
T1_AGATCTGCACGAAAGC	Background
T1_AGATCTGGTACGACCC	Background
T1_AGATCTGGTCCCTACT	Background
T1_AGATTGCCATATACCG	Background
T1_AGATTGCGTAGCTGCC	Background
T1_AGCAGCCCAAGCCGCT	Background
T1_AGCAGCCCACGGACAA	Background
T1_AGCATACCAATGCCAT	Background
T1_AGCATACGTAACGACG	Background
T1_AGCATACTCCTGCTTG	Background
T1_AGCGGTCAGCTTATCG	Background
T1_AGCGGTCCACCAGCAC	Background
T1_AGCGGTCTCCGAAGAG	Background
T1_AGCGTATGTATAGTAG	Background
T1_AGCGTCGTCACTCTTA	Background
T1_AGCTCCTCACAGGCCT	Background
T1_AGCTCCTCACCATCCT	Background
T1_AGCTCCTCACTAAGTC	Background
T1_AGCTCTCCACCATCCT	Background
T1_AGCTCTCTCGGAGGTA	Background
T1_AGCTTGAAGCCCTAAT	Background
T1_AGCTTGACACGGACAA	Background
T1_AGCTTGACAGACGCTC	Background
T1_AGCTTGACAGTTCCCT	Background
T1_AGCTTGATCAATCACG	Background
T1_AGGCCACAGTCCCACG	Background
T1_AGGCCACTCCTTTCTC	Background
T1_AGGCCACTCGGCATCG	Background
T1_AGGGAGTCAAGAGGCT	Background
T1_AGGGAGTGTCATATCG	Background
T1_AGGGAGTTCTCCAGGG	Background
T1_AGGGATGAGCTGCCCA	Background
T1_AGGGATGGTAGAAAGG	High-Risk
T1_AGGGATGTCTCTTATG	Background
T1_AGGTCATAGTCCAGGA	Background
T1_AGGTCATCAGGGATTG	Background
T1_AGGTCATCAGGTTTCA	Background
T1_AGGTCATCATCCGGGT	High-Risk
T1_AGGTCATTCCAGGGCT	High-Risk
T1_AGGTCATTCTTGTATC	Background
T1_AGGTCCGAGATGCCAG	Background
T1_AGGTCCGTCTCCAACC	Background
T1_AGTAGTCCAGTAAGCG	Background
T1_AGTAGTCTCAGTACGT	Background
T1_AGTCTTTAGCCAGTAG	Background
T1_AGTCTTTAGGGAACGG	Background
T1_AGTCTTTCATTACGAC	Background
T1_AGTCTTTGTGACAAAT	Background
T1_AGTGAGGAGACAGGCT	Background
T1_AGTGAGGGTAAGTGTA	Background
T1_AGTGAGGTCCAAACAC	High-Risk
T1_AGTGGGACACAGCCCA	Background
T1_AGTGGGACATCGATTG	High-Risk
T1_AGTGGGAGTTACGACT	Background
T1_AGTGGGATCGCCGTGA	Background
T1_AGTGTCAAGCGACGTA	Background
T1_AGTGTCACATTAACCG	Background
T1_AGTGTCAGTACCAGTT	Background
T1_AGTGTCAGTAGCTCCG	Background
T1_AGTGTCAGTCAATGTC	Background
T1_AGTTGGTGTCTCTCTG	High-Risk
T1_AGTTGGTTCAGCAACT	Background
T1_AGTTGGTTCCTCAATT	Background
T1_ATAACGCCACTCAGGC	Background
T1_ATAACGCCAGACTCGC	Background
T1_ATAACGCGTCAGAGGT	Background
T1_ATAACGCGTGTGAATA	High-Risk
T1_ATAAGAGAGCTGCAAG	Background
T1_ATAAGAGTCGGTCCGA	Background
T1_ATAGACCAGGATGGTC	Background
T1_ATAGACCGTACGAAAT	Background
T1_ATAGACCTCCTTGCCA	Background
T1_ATCACGACAGTCAGCC	Background
T1_ATCACGAGTATGAAAC	Background
T1_ATCATCTAGATATGCA	Background
T1_ATCATCTAGCCACTAT	Background
T1_ATCATCTGTAGCGTCC	Background
T1_ATCATCTTCTCTTGAT	High-Risk
T1_ATCATGGTCAGAAATG	Background
T1_ATCCACCCAGGCAGTA	High-Risk
T1_ATCCGAAAGCTCCTTC	High-Risk
T1_ATCCGAAAGGCAGGTT	Background
T1_ATCCGAACACGTCTCT	Background
T1_ATCGAGTCACAGCCCA	Background
T1_ATCGAGTGTAGAGTGC	Background
T1_ATCGAGTGTATCTGCA	Background
T1_ATCGAGTGTGGGTCAA	Background
T1_ATCTACTAGCTGCGAA	Background
T1_ATCTACTTCACCAGGC	Background
T1_ATCTACTTCGTTGACA	Background
T1_ATCTGCCAGCAGCGTA	Background
T1_ATCTGCCTCCTTTACA	Background
T1_ATGCGATGTAAGTGTA	Background
T1_ATGGGAGCAGATCCAT	Background
T1_ATGTGTGTCTTCATGT	Background
T1_ATTACTCAGAAGCCCA	Background
T1_ATTACTCAGGACGAAA	High-Risk
T1_ATTACTCAGTCATCCA	Background
T1_ATTACTCCATGCATGT	Background
T1_ATTACTCGTGCCTGCA	Background
T1_ATTACTCTCTTAGCCC	Background
T1_ATTATCCCATTTCACT	Background
T1_ATTATCCGTAAAGGAG	Background
T1_ATTATCCGTACCTACA	Background
T1_ATTATCCGTCTGGTCG	Background
T1_ATTATCCTCGTCTGCT	Background
T1_ATTCTACAGCAATATG	Background
T1_ATTCTACCAAGTTCTG	Background
T1_ATTCTACCAATGTAAG	Background
T1_ATTCTACTCCTCATTA	Background
T1_ATTGGACAGTTTGCGT	Background
T1_ATTGGACTCCTAGGGC	Background
T1_ATTGGTGAGTCGATAA	Background
T1_ATTTCTGCATCCTTGC	Background
T1_CAACCAAAGAGGTTAT	Background
T1_CAACCAAAGTGTGGCA	Background
T1_CAACCAACAATGTTGC	Background
T1_CAACCAACAGGGTTAG	Background
T1_CAACCAACATGGATGG	Background
T1_CAACCAATCTCTTATG	Background
T1_CAACCTCAGGATTCGG	Background
T1_CAACCTCCAAGTAGTA	Background
T1_CAACCTCCATACTACG	Background
T1_CAACCTCTCAAGATCC	Background
T1_CAAGAAAAGGGAGTAA	Background
T1_CAAGATCAGCCACGCT	Background
T1_CAAGATCCATGATCCA	Background
T1_CAAGGCCAGCTAGCCC	Background
T1_CAAGGCCCATTACCTT	Background
T1_CAAGGCCGTATTCTCT	Background
T1_CAAGGCCTCTAACCGA	Background
T1_CAAGTTGAGAGCTTCT	Background
T1_CAAGTTGAGTAGCCGA	High-Risk
T1_CAAGTTGCAATAAGCA	Background
T1_CAAGTTGTCAGCGATT	Background
T1_CACAAACAGTGATCGG	Background
T1_CACAAACGTTGCGCAC	High-Risk
T1_CACAAACTCACGCGGT	High-Risk
T1_CACAAACTCTGTTGAG	Background
T1_CACACCTGTCAAACTC	Background
T1_CACACCTTCAGCTTAG	Background
T1_CACACTCAGGCACATG	Background
T1_CACAGGCAGAGAACAG	High-Risk
T1_CACAGGCAGCCTATGT	Background
T1_CACAGGCCACCGTTGG	Background
T1_CACAGGCCAGCTGTGC	Background
T1_CACAGGCGTTAGTGGG	Background
T1_CACAGGCTCGACGGAA	Background
T1_CACAGGCTCTTCTGGC	Background
T1_CACAGTACAGCATGAG	Background
T1_CACAGTAGTGGCAAAC	Background
T1_CACAGTATCAACGCTA	Background
T1_CACAGTATCCGGCACA	Background
T1_CACATAGAGGCAGTCA	Background
T1_CACATAGAGTACATGA	Background
T1_CACATAGCATTGGGCC	Background
T1_CACATAGGTTGTGGCC	Background
T1_CACATAGTCAGGCCCA	Background
T1_CACATTTAGCAGGCTA	High-Risk
T1_CACATTTAGCCACTAT	Background
T1_CACATTTGTAGCGCAA	Background
T1_CACCACTGTTGGAGGT	Background
T1_CACCACTTCCGTCAAA	Background
T1_CACCAGGAGTTGTCGT	Background
T1_CACCAGGCACGCTTTC	Background
T1_CACCAGGTCCGTTGTC	Background
T1_CACCTTGAGAGTACAT	Background
T1_CACCTTGAGTAAGTAC	Background
T1_CACCTTGCACGAGAGT	Background
T1_CACCTTGGTTAGAACA	Background
T1_CACTCCAAGCTCTCGG	Background
T1_CACTCCACAGATGGGT	Background
T1_CACTCCAGTGAGGCTA	Background
T1_CAGAATCAGGTGTTAA	High-Risk
T1_CAGAATCAGTTAGCGG	Background
T1_CAGAATCCACGGCGTT	Background
T1_CAGATCAAGGCGCTCT	Background
T1_CAGATCACAGCCTATA	Background
T1_CAGATCATCGTCCAGG	Background
T1_CAGCAGCGTGGCTCCA	Background
T1_CAGCATAAGCGAGAAA	Background
T1_CAGCATAAGTACCGGA	Background
T1_CAGCATACAGTTAACC	Background
T1_CAGCCGAAGCGGCTTC	Background
T1_CAGCCGATCAACACAC	Background
T1_CAGCCGATCTTGTTTG	Background
T1_CAGCGACAGATGCCAG	Background
T1_CAGCGACGTACTCGCG	Background
T1_CAGCGACTCAATCTCT	Background
T1_CAGCTAACAAGCCATT	Background
T1_CAGCTAACACTTAACG	Background
T1_CAGCTAACAGACGCTC	Background
T1_CAGCTAAGTCTGCGGT	Background
T1_CAGCTAAGTGTGGTTT	Background
T1_CAGCTAATCGTTTGCC	Background
T1_CAGCTAATCTCGTATT	Background
T1_CAGCTAATCTGGAGCC	High-Risk
T1_CAGCTGGCACAGCCCA	Background
T1_CAGCTGGTCATAAAGG	Background
T1_CAGCTGGTCTCATTCA	Background
T1_CAGGTGCCATGGGAAC	Background
T1_CAGGTGCGTTGCGCAC	Background
T1_CAGGTGCTCTCTTATG	Background
T1_CAGTAACCACATCTTT	Background
T1_CAGTCCTTCGCGGATC	Background
T1_CATATGGAGGTTACCT	Background
T1_CATATGGTCAGTTAGC	Background
T1_CATCAAGAGCTGATAA	Background
T1_CATCAAGAGTGTGGCA	Background
T1_CATCAAGGTACGCTGC	Background
T1_CATCAAGGTCCGTGAC	Background
T1_CATCAAGTCCCTTGCA	Background
T1_CATCGAACACAACTGT	Background
T1_CATCGAAGTTGAGTTC	Background
T1_CATCGAATCATAAAGG	Background
T1_CATCGGGTCAACACGT	High-Risk
T1_CATCGGGTCAGCTTAG	Background
T1_CATCGGGTCTGCGACG	Background
T1_CATGCCTAGATATACG	Background
T1_CATGCCTAGCTCCTTC	Background
T1_CATGCCTCACAACTGT	Background
T1_CATGCCTCACCACGTG	Background
T1_CATGCCTCATTATCTC	High-Risk
T1_CATGCCTGTTCGTGAT	Background
T1_CATGGCGCAGGATTGG	Background
T1_CATGGCGCATGGGAAC	Background
T1_CATGGCGGTGCCTGCA	High-Risk
T1_CATGGCGTCGCTTGTC	Background
T1_CATTATCAGGCTAGGT	Background
T1_CATTATCAGGCTCAGA	Background
T1_CATTATCCAGGTTTCA	Background
T1_CATTATCGTCTAGCGC	Background
T1_CATTCGCAGCCAGGAT	Background
T1_CATTCGCCACGTAAGG	Background
T1_CCAATCCGTGCCTTGG	Background
T1_CCAATCCTCAGAGGTG	Background
T1_CCACCTAAGTGTGGCA	Background
T1_CCACGGATCATGCAAC	High-Risk
T1_CCAGCGAGTTGTGGAG	Background
T1_CCAGCGATCAAAGTAG	Background
T1_CCATGTCCACCAGGCT	Background
T1_CCATGTCTCCAATGGT	Background
T1_CCATTCGCAGATAATG	Background
T1_CCATTCGGTTACGTCA	Background
T1_CCCAATCAGCACCGCT	High-Risk
T1_CCCAATCGTGGAAAGA	Background
T1_CCCAATCTCCTTAATC	Background
T1_CCCAGTTTCTCTAGGA	Background
T1_CCCATACCACGAAACG	Background
T1_CCCATACCAGTGGGAT	High-Risk
T1_CCCATACGTTGGTTTG	Background
T1_CCGGTAGAGTTAGGTA	Background
T1_CCGTACTCAACAACCT	Background
T1_CCGTACTCACACGCTG	Background
T1_CCGTACTCAGTGACAG	Background
T1_CCGTACTGTAGAAAGG	Background
T1_CCGTACTGTAGCTTGT	Background
T1_CCGTGGACAAGCGATG	Background
T1_CCGTGGACAGCGTCCA	Background
T1_CCGTGGAGTCTAACGT	Background
T1_CCGTGGATCCTAGTGA	High-Risk
T1_CCGTGGATCTTCATGT	Background
T1_CCGTTCACATGTAGTC	Background
T1_CCGTTCAGTAGCCTAT	Background
T1_CCGTTCATCGTGGACC	Background
T1_CCTAAAGAGCTCCTTC	Background
T1_CCTAAAGCACGGTAAG	Background
T1_CCTAAAGTCAAGATCC	Background
T1_CCTAAAGTCGCCAGCA	Background
T1_CCTACACAGAACAATC	Background
T1_CCTACACGTCTAAACC	Background
T1_CCTACCAAGTGCTGCC	Background
T1_CCTAGCTGTCATCGGC	Background
T1_CCTATTAAGGTTACCT	Background
T1_CCTATTAAGTTACGGG	Background
T1_CCTATTAGTGATGATA	Background
T1_CCTATTATCAGGCCCA	Background
T1_CCTCAGTAGTGGGATC	Background
T1_CCTCAGTCAGTAGAGC	Background
T1_CCTCAGTGTATGAAAC	Background
T1_CCTCTGAAGATCCCAT	Background
T1_CCTCTGAGTGATAAGT	Background
T1_CCTCTGAGTTTGGGCC	Background
T1_CCTTACGAGCGCTCCA	Background
T1_CCTTACGGTGTTGGGA	Background
T1_CCTTACGTCAAGCCTA	Background
T1_CCTTCCCCAGGAACGT	Background
T1_CCTTCCCGTGTGGCTC	Background
T1_CCTTCCCTCACATACG	Background
T1_CCTTCCCTCACGATGT	Background
T1_CCTTCCCTCAGCCTAA	Background
T1_CCTTCCCTCCAAACAC	Background
T1_CCTTCGAAGAAACGAG	Background
T1_CCTTCGATCATCTGCC	Background
T1_CCTTCGATCCGCAAGC	Background
T1_CCTTTCTCATTCTCAT	High-Risk
T1_CGAACATAGATGCCAG	Background
T1_CGAACATAGCGCCTTG	Background
T1_CGAACATAGCTACCTA	Background
T1_CGAATGTGTTGTGGAG	Background
T1_CGACCTTCACAGGCCT	High-Risk
T1_CGACCTTGTTATCCGA	Background
T1_CGACCTTGTTGGTAAA	Background
T1_CGACTTCAGATCCCGC	Background
T1_CGAGAAGTCGCATGGC	Background
T1_CGAGAAGTCGTACCGG	Background
T1_CGAGCACTCCGGCACA	Background
T1_CGAGCCAAGCCCAACC	Background
T1_CGAGCCATCCCAACGG	Background
T1_CGATCGGCATTCTTAC	Background
T1_CGATCGGGTCGGCATC	High-Risk
T1_CGATGGCTCCATGAAC	Background
T1_CGATGTAAGACGCACA	Background
T1_CGATTGAAGGCTAGGT	High-Risk
T1_CGATTGAGTCGCTTTC	Background
T1_CGATTGATCACCACCT	High-Risk
T1_CGCGGTAAGGCTACGA	High-Risk
T1_CGCGGTACAGGTGGAT	Background
T1_CGCGGTAGTACAGCAG	Background
T1_CGCGTTTGTACAGTGG	High-Risk
T1_CGCTATCAGGGAACGG	Background
T1_CGCTATCGTAAGGATT	Background
T1_CGCTTCATCCCTAACC	Background
T1_CGGACACAGCGATCCC	Background
T1_CGGACGTCAGTAACGG	High-Risk
T1_CGGACGTTCTGCTGTC	Background
T1_CGGACTGAGTTGAGTA	Background
T1_CGGACTGTCATGCTCC	Background
T1_CGGACTGTCTTAACCT	Background
T1_CGGAGTCGTAGCTAAA	Background
T1_CGGCTAGCAAGGACAC	Background
T1_CGGCTAGCACAAGCCC	Background
T1_CGGCTAGTCCAAGTAC	Background
T1_CGGCTAGTCCGCAAGC	Background
T1_CGGGTCATCCCAAGTA	Background
T1_CGGGTCATCGCTTAGA	Background
T1_CGGTTAAAGTGTTGAA	Background
T1_CGGTTAACAGACGCCT	Background
T1_CGGTTAACATCGGGTC	Background
T1_CGGTTAAGTTGAGGTG	Background
T1_CGGTTAAGTTTGGCGC	Background
T1_CGTAGCGGTCTAGCGC	Background
T1_CGTAGCGTCAGGCGAA	Background
T1_CGTAGGCTCCTCTAGC	Background
T1_CGTAGGCTCGATCCCT	Background
T1_CGTAGGCTCGCCAAAT	Background
T1_CGTCACTCAAAGCGGT	Background
T1_CGTCACTTCACCAGGC	Background
T1_CGTCCATCAATAGCAA	Background
T1_CGTCCATGTAAACGCG	Background
T1_CGTCCATGTCATGCCG	Background
T1_CGTCCATTCCTGCAGG	Background
T1_CGTCTACAGGATATAC	High-Risk
T1_CGTGAGCTCACTATTC	Background
T1_CGTGTAACATGCAACT	High-Risk
T1_CGTGTAAGTAGCTCCG	Background
T1_CGTGTAATCACATACG	Background
T1_CGTGTAATCTCGCTTG	Background
T1_CGTGTCTGTGCGGTAA	Background
T1_CGTGTCTTCATTGCGA	Background
T1_CGTGTCTTCCCTTGCA	Background
T1_CGTGTCTTCGTGACAT	Background
T1_CGTTAGATCCTATTCA	Background
T1_CGTTCTGAGGAATTAC	High-Risk
T1_CGTTCTGAGGACCACA	Background
T1_CGTTCTGTCCGCATAA	Background
T1_CGTTGGGAGTGCGTGA	Background
T1_CGTTGGGCACATGGGA	Background
T1_CTAACTTAGCACGCCT	Background
T1_CTAACTTAGGGCACTA	Background
T1_CTAACTTGTCACCCAG	Background
T1_CTAACTTGTTAAAGTG	Background
T1_CTAACTTTCCGGCACA	Background
T1_CTAACTTTCTTGGGTA	Background
T1_CTAAGACTCAAACGGG	Background
T1_CTAATGGCACAGATTC	Background
T1_CTACACCCATAGACTC	Background
T1_CTACACCGTTCGTTGA	Background
T1_CTACACCTCGCTTAGA	Background
T1_CTACATTTCATACGGT	Background
T1_CTACATTTCCCATTTA	Background
T1_CTACCCAAGCAGGCTA	Background
T1_CTACCCACATGGTCTA	Background
T1_CTACCCACATTCCTCG	Background
T1_CTACCCATCCTTTCTC	Background
T1_CTACCCATCTGCTGTC	Background
T1_CTACGTCAGACTAGAT	Background
T1_CTACGTCAGCGCCTCA	Background
T1_CTACGTCCATGACGGA	Background
T1_CTACGTCTCACTTACT	Background
T1_CTAGCCTAGCGTTTAC	Background
T1_CTAGCCTGTTCCATGA	Background
T1_CTAGCCTTCAACGGCC	Background
T1_CTAGTGAAGCCACGCT	Background
T1_CTAGTGACAATCTACG	Background
T1_CTAGTGACATAGGATA	Background
T1_CTAGTGATCATCACCC	Background
T1_CTCACACAGGGTATCG	Background
T1_CTCACACCAAACTGTC	Background
T1_CTCACACTCAACACGT	Background
T1_CTCACACTCATTGCCC	Background
T1_CTCAGAAAGAAGAAGC	Background
T1_CTCAGAAAGTGGGATC	Background
T1_CTCAGAATCAGAGACG	Background
T1_CTCATTAAGCGTCAAG	Background
T1_CTCATTACACGTCAGC	Background
T1_CTCATTAGTCTAAACC	Background
T1_CTCATTATCAGTTTGG	Background
T1_CTCCTAGCATGCCTTC	Background
T1_CTCCTAGTCTTAGCCC	Background
T1_CTCGAAAAGAAACCTA	Background
T1_CTCGAAAAGTCAATAG	Background
T1_CTCGAAATCACCATAG	Background
T1_CTCGAGGAGAGTTGGC	Background
T1_CTCGAGGAGCGTTCCG	Background
T1_CTCGAGGAGCTGCAAG	Background
T1_CTCGAGGGTTATTCTC	Background
T1_CTCGGAGAGCGACGTA	Background
T1_CTCGGAGAGCTAAGAT	High-Risk
T1_CTCGGAGGTAGCCTAT	Background
T1_CTCGGGACATGGTCAT	Background
T1_CTCGTACAGTTAACGA	Background
T1_CTCGTACCAACACGCC	Background
T1_CTCGTACGTAATAGCA	Background
T1_CTCGTACGTCAACATC	Background
T1_CTCGTCATCAACTCTT	Background
T1_CTCGTCATCACGACTA	Background
T1_CTCTAATCAAATACAG	Background
T1_CTCTAATCATGGTTGT	Background
T1_CTCTAATGTCTGGAGA	Background
T1_CTCTACGCAATCCAAC	Background
T1_CTCTGGTCATTATCTC	Background
T1_CTCTGGTTCTCGGACG	Background
T1_CTGAAACAGACTGGGT	Background
T1_CTGAAACCACCCTATC	Background
T1_CTGAAGTCACACGCTG	Background
T1_CTGAAGTCATTGGGCC	Background
T1_CTGATAGAGTCGAGTG	Background
T1_CTGATAGGTTGTGGCC	Background
T1_CTGATAGTCAGATAAG	Background
T1_CTGATCCAGTACGACG	High-Risk
T1_CTGATCCCATCGATGT	Background
T1_CTGATCCGTCTAACGT	Background
T1_CTGCCTAAGTAGCCGA	Background
T1_CTGCCTAGTTTGACTG	Background
T1_CTGCGGATCTCTGCTG	Background
T1_CTGCTGTAGTTAACGA	Background
T1_CTGCTGTCACCGCTAG	Background
T1_CTGCTGTGTACTCGCG	Background
T1_CTGCTGTTCACCATAG	Background
T1_CTGCTGTTCGATGAGG	Background
T1_CTGGTCTCAAACGTGG	Background
T1_CTGGTCTCACGTAAGG	Background
T1_CTGGTCTGTTGAGGTG	Background
T1_CTGGTCTTCTTCATGT	Background
T1_CTGTGCTCAAATCCGT	Background
T1_CTGTGCTCACGAAACG	Background
T1_CTGTGCTCATGTCTCC	Background
T1_CTGTGCTGTGTAAGTA	Background
T1_CTGTTTAAGGGTTCCC	Background
T1_CTTAACTGTCTCTCTG	Background
T1_CTTAACTTCAGTCCCT	Background
T1_CTTACCGAGAAACCTA	High-Risk
T1_CTTACCGCAGTAAGAT	Background
T1_CTTACCGCATCACCCT	Background
T1_CTTACCGTCGGTTCGG	Background
T1_CTTACCGTCTGATACG	Background
T1_CTTAGGAAGCTAGTCT	Background
T1_CTTAGGACAAATCCGT	Background
T1_CTTAGGACAGCCTGTG	Background
T1_CTTAGGACATCGGAAG	Background
T1_CTTAGGATCTTGCAAG	Background
T1_CTTCTCTCATATGCTG	Background
T1_CTTCTCTGTTATCACG	Background
T1_CTTGGCTAGAGAGCTC	Background
T1_CTTGGCTTCCCGGATG	Background
T1_CTTTGCGAGCCACCTG	Background
T1_CTTTGCGCAAGGACAC	Background
T1_GAAACTCAGCTGAAAT	Background
T1_GAAACTCAGGCGTACA	Background
T1_GAAACTCAGTCAAGGC	Background
T1_GAAACTCCACCGAAAG	Background
T1_GAAACTCCAGCGTCCA	High-Risk
T1_GAAACTCGTGTATGGG	Background
T1_GAAACTCTCCTCCTAG	Background
T1_GAAACTCTCTATCCCG	Background
T1_GAAACTCTCTTCGGTC	Background
T1_GAACATCTCTTGTATC	High-Risk
T1_GAACCTATCAAACCAC	Background
T1_GAAGCAGGTACTTAGC	Background
T1_GAAGCAGGTTAAGGGC	Background
T1_GAATAAGCAGGCTCAC	Background
T1_GAATAAGGTCGCTTCT	Background
T1_GAATAAGTCTCTAAGG	Background
T1_GAATAAGTCTGCAGTA	Background
T1_GAATGAAGTTACGGAG	Background
T1_GACACGCAGGGAGTAA	Background
T1_GACACGCCATCGGTTA	Background
T1_GACACGCGTACGAAAT	Background
T1_GACACGCTCTAACTCT	High-Risk
T1_GACAGAGCAGTCAGAG	Background
T1_GACAGAGTCAAGCCTA	Background
T1_GACCAATCACGACTCG	Background
T1_GACCAATCAGCTGGCT	Background
T1_GACCAATGTGCAACGA	Background
T1_GACCTGGCACTTCTGC	Background
T1_GACCTGGCATGGTAGG	Background
T1_GACCTGGTCCGTAGTA	Background
T1_GACGCGTAGTCCAGGA	High-Risk
T1_GACGCGTTCTTACCTA	Background
T1_GACGGCTCAGCCTTTC	Background
T1_GACGTGCAGAGCTTCT	Background
T1_GACGTGCAGAGGGCTT	Background
T1_GACGTGCGTGCAGACA	Background
T1_GACGTGCTCTAGAGTC	Background
T1_GACGTTAAGAGCCCAA	Background
T1_GACGTTAAGTCGTACT	Background
T1_GACGTTACAACTGCTA	Background
T1_GACGTTATCGCGTTTC	Background
T1_GACTAACCAGATCTGT	Background
T1_GACTACAAGGCTAGAC	Background
T1_GACTACACAGCTCCGA	Background
T1_GACTACAGTAGCTAAA	High-Risk
T1_GACTGCGAGCCAGAAC	Background
T1_GACTGCGAGCCGTCGT	High-Risk
T1_GACTGCGGTTCGAATC	Background
T1_GACTGCGTCACTATTC	Background
T1_GACTGCGTCCGCGTTT	Background
T1_GACTGCGTCCTTGACC	Background
T1_GAGCAGAGTCTAGCGC	Background
T1_GAGCAGATCGTCCAGG	High-Risk
T1_GAGCAGATCTCCCTGA	Background
T1_GAGCAGATCTTGTACT	Background
T1_GAGGTGAGTAGCGCTC	Background
T1_GAGGTGATCTCTTGAT	Background
T1_GAGTCCGTCAAAGTAG	Background
T1_GATCAGTAGTACATGA	Background
T1_GATCAGTGTATCTGCA	Background
T1_GATCGATCACCTATCC	Background
T1_GATCGATTCTCAAACG	Background
T1_GATCGCGAGCTTTGGT	Background
T1_GATCGCGGTCAGAGGT	Background
T1_GATCGCGGTCGCGAAA	Background
T1_GATCGTAGTGCAACTT	Background
T1_GATCTAGAGCTCCCAG	High-Risk
T1_GATCTAGCATCCGGGT	Background
T1_GATGAAACAGGCAGTA	Background
T1_GATGAAAGTATAATGG	Background
T1_GATGAAAGTGGTCTCG	High-Risk
T1_GATGAGGCAAACAACA	High-Risk
T1_GATGAGGCACCATGTA	Background
T1_GATGCTAAGTACACCT	Background
T1_GATGCTACATGCCTAA	Background
T1_GATGCTAGTCCAGTAT	High-Risk
T1_GATGCTATCGGAGCAA	Background
T1_GATTCAGCATGGTTGT	Background
T1_GATTCAGCATTCTCAT	Background
T1_GATTCAGGTATTCGTG	Background
T1_GCAAACTAGCGTTCCG	Background
T1_GCAATCAAGATCCTGT	Background
T1_GCAATCACACTCAGGC	Background
T1_GCAATCATCAAGATCC	Background
T1_GCACATACAGTCGATT	Background
T1_GCACTCTAGCGTGAAC	Background
T1_GCACTCTCATGGGACA	Background
T1_GCACTCTGTCATGCCG	Background
T1_GCACTCTGTGTGAAAT	Background
T1_GCACTCTTCCGTTGCT	Background
T1_GCACTCTTCGGCTTGG	Background
T1_GCACTCTTCGTTGCCT	High-Risk
T1_GCACTCTTCTTCGGTC	Background
T1_GCAGTTAGTTAAGGGC	Background
T1_GCAGTTATCTCGGACG	Background
T1_GCATACAAGAAGGTTT	Background
T1_GCATACAAGCCACCTG	Background
T1_GCATACAAGGCTAGAC	Background
T1_GCATACACACAGACAG	Background
T1_GCATACATCAGTCCCT	Background
T1_GCATACATCGTGGTCG	Background
T1_GCATGATAGTCGCCGT	Background
T1_GCATGATGTAAGCACG	Background
T1_GCATGATGTGACGCCT	Background
T1_GCATGATTCCCGGATG	Background
T1_GCATGCGAGAGTACCG	Background
T1_GCATGCGGTACCAGTT	High-Risk
T1_GCATGTAAGCTAGTTC	Background
T1_GCCAAATGTCCGTGAC	Background
T1_GCCTCTATCGGACAAG	Background
T1_GCGACCAGTTAGATGA	Background
T1_GCGACCAGTTCACGGC	High-Risk
T1_GCGAGAAAGGCAATTA	Background
T1_GCGAGAACATCAGTCA	Background
T1_GCGCAACTCCAATGGT	Background
T1_GCGCAACTCTATCGCC	Background
T1_GCGCAGTAGAAACCAT	Background
T1_GCGCAGTAGCCCTAAT	High-Risk
T1_GCGCAGTAGCTTATCG	Background
T1_GCGCAGTTCAACCATG	Background
T1_GCGCCAATCAGTTGAC	Background
T1_GCGCCAATCATGTCCC	Background
T1_GCGCCAATCCGCAGTG	Background
T1_GCGCGATAGTGCGTGA	Background
T1_GCGCGATGTCTGCAAT	Background
T1_GCGCGATGTGTAATGA	Background
T1_GCGGGTTAGACGCAAC	Background
T1_GCTCCTACAAAGTCAA	Background
T1_GCTCCTACAAGAAGAG	Background
T1_GCTCCTACAAGGACTG	Background
T1_GCTCTGTAGGACTGGT	High-Risk
T1_GCTGCAGCACAGCCCA	Background
T1_GCTGCAGGTGTTGAGG	Background
T1_GCTGCGACACAGATTC	Background
T1_GCTGCGATCATAGCAC	Background
T1_GCTGCGATCTTTAGTC	Background
T1_GCTGCTTAGGTAAACT	Background
T1_GCTGCTTAGTTGTAGA	High-Risk
T1_GCTGCTTGTACTTGAC	High-Risk
T1_GCTGCTTGTCCGAATT	Background
T1_GCTGCTTGTGTTGGGA	Background
T1_GCTGCTTTCTTCCTTC	Background
T1_GCTGGGTAGCGTGAAC	Background
T1_GCTGGGTAGTTAGGTA	Background
T1_GCTGGGTGTTTAAGCC	Background
T1_GCTGGGTGTTTGACAC	Background
T1_GCTGGGTTCATTTGGG	Background
T1_GCTTCCAAGATGCCAG	Background
T1_GCTTCCAGTAGCTTGT	Background
T1_GCTTCCAGTCAAAGCG	Background
T1_GCTTCCATCATGCATG	Background
T1_GCTTGAATCATAACCG	Background
T1_GGAACTTGTCCAAGTT	Background
T1_GGAACTTGTCTGCGGT	Background
T1_GGACAAGGTCTACCTC	Background
T1_GGACAAGGTTGCTCCT	Background
T1_GGACAAGGTTTCCACC	Background
T1_GGACAGATCTACCAGA	Background
T1_GGACATTTCAAACGGG	Background
T1_GGACGTCCAATCGAAA	Background
T1_GGACGTCCAATGGTCT	Background
T1_GGACGTCCAGTACACT	Background
T1_GGACGTCCAGTTTACG	Background
T1_GGACGTCTCCTAAGTG	High-Risk
T1_GGACGTCTCTGCGGCA	Background
T1_GGAGCAACATAAGACA	Background
T1_GGAGCAATCAACGAAA	Background
T1_GGAGCAATCTACTATC	Background
T1_GGAGCAATCTGACCTC	Background
T1_GGATGTTAGCTCAACT	Background
T1_GGATTACAGCCCGAAA	Background
T1_GGATTACTCCTTTACA	Background
T1_GGCAATTCACTCAGGC	High-Risk
T1_GGCCGATAGTACGATA	Background
T1_GGCGACTAGGAGTACC	Background
T1_GGCGTGTTCGTATCAG	Background
T1_GGCTCGAGTAGCCTCG	Background
T1_GGCTGGTCAAAGTGCG	Background
T1_GGCTGGTGTCTGCAAT	Background
T1_GGGAATGAGACAGAGA	Background
T1_GGGAATGAGTCGAGTG	Background
T1_GGGAATGCATTATCTC	Background
T1_GGGAATGTCTTGGGTA	Background
T1_GGGACCTCACAAGCCC	Background
T1_GGGACCTCACGAAAGC	Background
T1_GGGACCTCATTGAGCT	Background
T1_GGGACCTGTCGCATAT	High-Risk
T1_GGGAGATAGGCGCTCT	Background
T1_GGGCACTCATGGTTGT	Background
T1_GGGCATCAGATCCCAT	High-Risk
T1_GGGCATCCAGGATTGG	Background
T1_GGGCATCTCACATACG	Background
T1_GGGTCTGCACGGACAA	Background
T1_GGGTCTGGTAACGACG	Background
T1_GGGTCTGGTAGATTAG	Background
T1_GGGTCTGTCTGGTGTA	Background
T1_GGTATTGAGGACAGAA	Background
T1_GGTATTGTCGAACGGA	Background
T1_GGTGAAGAGTGTACTC	Background
T1_GGTGAAGCATTCTCAT	Background
T1_GGTGAAGGTTTGTGTG	Background
T1_GGTGTTACAGTTCCCT	Background
T1_GGTGTTAGTTGGTGGA	Background
T1_GGTGTTATCGTTTATC	Background
T1_GTAACGTCACCGAATT	Background
T1_GTAACTGCATGGAATA	Background
T1_GTAACTGGTAGCGTCC	Background
T1_GTAACTGTCCGCATCT	Background
T1_GTAACTGTCTGTCAAG	Background
T1_GTACGTAAGGGATGGG	Background
T1_GTACGTAAGTGGTAAT	Background
T1_GTACGTAGTTGATTGC	Background
T1_GTACGTATCGCTGATA	Background
T1_GTACTCCAGGCTCTTA	Background
T1_GTACTCCGTTCGTTGA	Background
T1_GTACTTTAGACGCACA	Background
T1_GTACTTTGTCTCTCGT	Background
T1_GTACTTTTCTGAGGGA	Background
T1_GTAGTCAGTAATCACC	Background
T1_GTATCTTAGACTGTAA	Background
T1_GTATCTTGTACCGCTG	Background
T1_GTATCTTGTGTTGGGA	Background
T1_GTATCTTTCACCGTAA	High-Risk
T1_GTATTCTCATTAACCG	Background
T1_GTATTCTGTCTCAACA	Background
T1_GTCACAACAATCTGCA	Background
T1_GTCACAACATGGGACA	Background
T1_GTCACAATCCCTTGTG	Background
T1_GTCACGGGTAAATGAC	Background
T1_GTCACGGGTAATAGCA	Background
T1_GTCATTTAGTGGTAGC	Background
T1_GTCATTTTCAACCATG	High-Risk
T1_GTCCTCACAAGGCTCC	Background
T1_GTCCTCACACCAGTTA	Background
T1_GTCCTCAGTAAGTGTA	Background
T1_GTCCTCATCCACGCAG	Background
T1_GTCCTCATCCGCGCAA	Background
T1_GTCGGGTTCCTAGGGC	High-Risk
T1_GTCGTAAAGATACACA	Background
T1_GTCGTAAGTGACGCCT	Background
T1_GTCTCGTAGGGCTTCC	Background
T1_GTCTCGTTCGTGGTCG	Background
T1_GTGAAGGTCGGTGTCG	Background
T1_GTGCAGCCAGATGGCA	Background
T1_GTGCAGCGTTCTGGTA	High-Risk
T1_GTGCATAAGCTGAACG	Background
T1_GTGCATACACGACGAA	Background
T1_GTGCATAGTGGAAAGA	Background
T1_GTGCATATCTGTGCAA	Background
T1_GTGCTTCAGCCCGAAA	Background
T1_GTGCTTCCAAGTAATG	Background
T1_GTGCTTCTCCTTGGTC	Background
T1_GTGGGTCCAGTATAAG	Background
T1_GTGGGTCTCCCACTTG	Background
T1_GTGTGCGAGAAACCGC	High-Risk
T1_GTGTGCGAGGCATTGG	Background
T1_GTGTGCGCAGTCACTA	High-Risk
T1_GTGTGCGGTTCGGCAC	Background
T1_GTGTTAGCAGTATGCT	Background
T1_GTGTTAGCATACCATG	Background
T1_GTGTTAGGTTGACGTT	Background
T1_GTTAAGCCAGTCTTCC	Background
T1_GTTAAGCTCACCTTAT	Background
T1_GTTACAGAGCTAGTTC	Background
T1_GTTACAGCAATGTTGC	Background
T1_GTTACAGTCACAGTAC	Background
T1_GTTCATTAGTGGACGT	Background
T1_GTTCATTGTCGATTGT	Background
T1_GTTCATTTCACCGGGT	Background
T1_GTTCATTTCACCGTAA	Background
T1_GTTCATTTCGTATCAG	Background
T1_GTTCGGGGTCGAATCT	Background
T1_GTTCGGGTCGTTGACA	Background
T1_GTTCGGGTCTATCCCG	Background
T1_GTTCTCGAGTCCGGTC	Background
T1_GTTCTCGGTAGTAGTA	Background
T1_GTTCTCGGTCTAAAGA	Background
T1_GTTCTCGGTTTGGCGC	Background
T1_GTTTCTACATCGATGT	Background
T1_GTTTCTACATGCTAGT	Background
T1_TAAACCGCAACACCTA	Background
T1_TAAACCGCATTGTGCA	Background
T1_TAAACCGGTAAGAGGA	Background
T1_TAAACCGTCGAGAGCA	Background
T1_TAAGAGAAGGTGCTTT	Background
T1_TAAGAGACAACTGCGC	Background
T1_TAAGAGAGTCACCCAG	Background
T1_TAAGAGAGTTCTGTTT	Background
T1_TAAGAGATCTCTGCTG	Background
T1_TAAGCGTAGAGGTACC	Background
T1_TAAGTGCAGCATCATC	Background
T1_TAAGTGCCAGGGCATA	High-Risk
T1_TAAGTGCGTACCGTAT	Background
T1_TACACGAAGCAGATCG	Background
T1_TACACGACAGGTCCAC	Background
T1_TACACGAGTGCCTGGT	Background
T1_TACACGAGTGCGGTAA	Background
T1_TACACGATCGACCAGC	Background
T1_TACAGTGCACGACTCG	Background
T1_TACAGTGCACTGCCAG	Background
T1_TACAGTGTCAGCTCGG	High-Risk
T1_TACAGTGTCGCTAGCG	Background
T1_TACCTATCATGCTAGT	Background
T1_TACCTTAAGCCCAATT	Background
T1_TACCTTACAAGCCATT	Background
T1_TACCTTACAGGACCCT	Background
T1_TACCTTATCAGATAAG	Background
T1_TACCTTATCTATCCTA	Background
T1_TACCTTATCTCGCTTG	Background
T1_TACGGATAGCGTCAAG	Background
T1_TACGGATGTCAGTGGA	Background
T1_TACGGGCCAGCGAACA	Background
T1_TACGGGCGTACTTGAC	High-Risk
T1_TACGGTAAGATACACA	Background
T1_TACTCATTCAGTTGAC	Background
T1_TACTCGCTCCCGACTT	Background
T1_TACTTGTAGGTGCTAG	Background
T1_TACTTGTAGTGAACAT	Background
T1_TACTTGTGTAAAGTCA	Background
T1_TACTTGTGTTTAGCTG	Background
T1_TACTTGTTCAGTCAGT	Background
T1_TAGACCAAGGGTCGAT	Background
T1_TAGACCATCCAAACAC	Background
T1_TAGAGCTTCCTCTAGC	Background
T1_TAGAGCTTCGCATGAT	Background
T1_TAGCCGGCACGGTTTA	Background
T1_TAGCCGGCATCGGTTA	Background
T1_TAGCCGGTCTAGCACA	Background
T1_TAGGCATGTAACGACG	High-Risk
T1_TAGTGGTAGGGAGTAA	Background
T1_TAGTGGTTCAACACCA	Background
T1_TAGTTGGAGGGAACGG	Background
T1_TAGTTGGCAGCCAGAA	Background
T1_TAGTTGGCAGGCGATA	Background
T1_TAGTTGGGTGGCGAAT	High-Risk
T1_TAGTTGGTCGTTGACA	Background
T1_TATCTCACAAGAGGCT	Background
T1_TATCTCACAATAGAGT	Background
T1_TATGCCCAGCCAACAG	Background
T1_TATGCCCCAATCGGTT	Background
T1_TATGCCCCACGACGAA	Background
T1_TATGCCCTCGGCATCG	Background
T1_TATGCCCTCTTATCTG	Background
T1_TATTACCGTGCTTCTC	Background
T1_TCAACGAAGCTAAACA	Background
T1_TCAACGACACCAGGCT	High-Risk
T1_TCAACGATCAACACTG	Background
T1_TCAATCTAGAAAGTGG	Background
T1_TCAATCTAGCTTCGCG	High-Risk
T1_TCAATCTCAAAGGAAG	High-Risk
T1_TCAATCTGTATCGCAT	Background
T1_TCAATCTGTCGACTAT	Background
T1_TCACAAGCAGCTGTGC	Background
T1_TCACGAACACACAGAG	Background
T1_TCACGAATCACAAACC	Background
T1_TCAGATGCAGAGCCAA	Background
T1_TCAGATGTCCTCAACC	Background
T1_TCAGCAACAGTCGATT	Background
T1_TCAGCAAGTAGCAAAT	High-Risk
T1_TCAGCAATCATTATCC	Background
T1_TCAGCTCCAAACCTAC	Background
T1_TCAGCTCGTGATAAAC	Background
T1_TCAGGATCACCAGGTC	Background
T1_TCAGGATGTACTTCTT	Background
T1_TCATTACGTAATCACC	High-Risk
T1_TCATTACGTGACCAAG	Background
T1_TCATTACGTTCTGGTA	High-Risk
T1_TCATTTGTCACAATGC	Background
T1_TCATTTGTCTACTCAT	Background
T1_TCCACACAGGACATTA	Background
T1_TCCACACGTCTTTCAT	Background
T1_TCCACACGTTACGGAG	Background
T1_TCCCGATCAGGGTATG	Background
T1_TCGAGGCTCAGCTTAG	Background
T1_TCGCGAGCAAGCTGGA	Background
T1_TCGCGTTCATGCGCAC	High-Risk
T1_TCGCGTTTCAACACTG	Background
T1_TCGCGTTTCACATAGC	Background
T1_TCGGGACCACTAAGTC	Background
T1_TCGGGACGTTAAGAAC	Background
T1_TCGGTAAAGTACCGGA	Background
T1_TCGGTAACAACGATGG	Background
T1_TCGGTAATCCCTGACT	Background
T1_TCGGTAATCTTGCATT	Background
T1_TCGTACCAGAGTCTGG	High-Risk
T1_TCGTACCAGTTATCGC	Background
T1_TCGTACCTCTAGCACA	Background
T1_TCGTAGACAGCTGGCT	Background
T1_TCGTAGAGTGGGTCAA	Background
T1_TCGTAGAGTTGGTTTG	Background
T1_TCTATTGAGGGATACC	Background
T1_TCTATTGCAGGGAGAG	Background
T1_TCTATTGTCGGTTCGG	Background
T1_TCTATTGTCGTCACGG	Background
T1_TCTATTGTCTACTATC	Background
T1_TCTATTGTCTCAAGTG	Background
T1_TCTCATAAGTTCCACA	Background
T1_TCTCATACAGACAAAT	Background
T1_TCTCATACAGACAAGC	Background
T1_TCTCATACAGTCCTTC	Background
T1_TCTCATACATGTCGAT	Background
T1_TCTCATAGTATCAGTC	Background
T1_TCTCATATCTTACCTA	Background
T1_TCTCTAAAGTCTCCTC	High-Risk
T1_TCTCTAATCCTGCTTG	Background
T1_TCTGAGAAGAAGAAGC	Background
T1_TCTGGAAAGCACACAG	Background
T1_TCTGGAAGTTACTGAC	Background
T1_TCTTCGGAGACCACGA	Background
T1_TCTTCGGCAATGGATA	High-Risk
T1_TCTTTCCTCATACGGT	Background
T1_TCTTTCCTCTTAGCCC	Background
T1_TGAAAGAAGGACAGAA	Background
T1_TGAAAGACACCGTTGG	Background
T1_TGAAAGACACTTAAGC	Background
T1_TGAAAGATCACAAACC	Background
T1_TGACAACAGAATGTGT	Background
T1_TGACGGCAGAATAGGG	Background
T1_TGACGGCTCGGCATCG	High-Risk
T1_TGACTAGGTCTAAAGA	Background
T1_TGACTAGTCCTGCAGG	Background
T1_TGACTTTGTAGTGAAT	Background
T1_TGAGAGGCATGCAACT	Background
T1_TGAGAGGGTCAAAGAT	Background
T1_TGAGAGGTCATCTGTT	Background
T1_TGAGCATTCGGCGGTT	Background
T1_TGAGCCGAGTACGCGA	High-Risk
T1_TGAGCCGCACCGTTGG	Background
T1_TGAGCCGTCCCTCTTT	Background
T1_TGAGGGAAGGCAGTCA	Background
T1_TGATTTCAGCACCGTC	Background
T1_TGATTTCGTTGACGTT	Background
T1_TGCACCTAGACATAAC	Background
T1_TGCACCTGTCGGCACT	Background
T1_TGCCAAAAGGTGCTTT	Background
T1_TGCCAAAAGTGGCACA	Background
T1_TGCCAAACACGAGAGT	Background
T1_TGCCAAATCATCACCC	Background
T1_TGCCAAATCTGCAAGT	High-Risk
T1_TGCCCATTCCTTTCGG	Background
T1_TGCCCTATCTATCGCC	Background
T1_TGCGCAGCAGGATTGG	Background
T1_TGCGCAGGTACTTGAC	Background
T1_TGCGCAGTCACCATAG	Background
T1_TGCGCAGTCTGGAGCC	Background
T1_TGCGGGTCACAGAGGT	Background
T1_TGCGGGTCATCCCACT	Background
T1_TGCGGGTGTACAGACG	Background
T1_TGCGGGTTCCTCTAGC	Background
T1_TGCGTGGTCGTGGTCG	Background
T1_TGCTACCGTACACCGC	High-Risk
T1_TGCTACCTCCAGTATG	Background
T1_TGCTGCTCAACTGGCC	Background
T1_TGCTGCTCATTAGGCT	Background
T1_TGGACGCCAATACGCT	Background
T1_TGGACGCCAATGGAGC	Background
T1_TGGACGCGTCTTGATG	Background
T1_TGGACGCTCCATGCTC	Background
T1_TGGCCAGAGCAACGGT	Background
T1_TGGCCAGTCCACGTTC	Background
T1_TGGCTGGGTACGAAAT	Background
T1_TGGCTGGTCTGTGCAA	Background
T1_TGGGAAGGTTGATTCG	Background
T1_TGGGCGTAGATCACGG	Background
T1_TGGGCGTAGGAGTACC	Background
T1_TGGTTCCCAATGCCAT	Background
T1_TGGTTCCGTCAAACTC	Background
T1_TGGTTCCGTCTCAACA	Background
T1_TGTCCCAAGGCAGTCA	Background
T1_TGTCCCACAAAGCGGT	Background
T1_TGTCCCAGTCTCCACT	Background
T1_TGTGGTAGTAACGACG	Background
T1_TGTGGTAGTTGGTAAA	Background
T1_TGTGGTATCTATCGCC	Background
T1_TGTGTTTCAATAGCAA	Background
T1_TGTGTTTCAGCTCGCA	Background
T1_TGTGTTTTCATTGCGA	Background
T1_TGTTCCGTCAACACTG	Background
T1_TTAACTCAGCTAGTCT	High-Risk
T1_TTAACTCAGGAATTAC	Background
T1_TTAACTCCAGGCTCAC	Background
T1_TTAACTCTCATGTCTT	Background
T1_TTAACTCTCGCGCCAA	Background
T1_TTAGGACAGCGTCTAT	Background
T1_TTAGGACCATGCAATC	Background
T1_TTAGGCAAGAAACGAG	Background
T1_TTAGTTCAGTGTACTC	Background
T1_TTAGTTCGTAGCACGA	Background
T1_TTAGTTCGTCCCGACA	Background
T1_TTAGTTCGTTTGACTG	Background
T1_TTATGCTGTAGCGATG	Background
T1_TTCCCAGAGGAATTAC	Background
T1_TTCCCAGTCCTAGTGA	Background
T1_TTCGAAGAGACAATAC	Background
T1_TTCGAAGCAACTGGCC	High-Risk
T1_TTCGAAGCAATGAAAC	Background
T1_TTCGGTCGTGACTCAT	Background
T1_TTCGGTCGTTATCGGT	Background
T1_TTCTACAGTAGCTCCG	Background
T1_TTCTCAAAGACTGTAA	Background
T1_TTCTCAACATCCGTGG	Background
T1_TTCTCAAGTAGCTGCC	Background
T1_TTCTCAAGTTCCGTCT	Background
T1_TTCTCAATCGCCAAAT	Background
T1_TTCTCAATCGGCCGAT	Background
T1_TTCTCCTAGATGCGAC	Background
T1_TTCTCCTGTAAGAGAG	Background
T1_TTCTCCTGTATGGTTC	Background
T1_TTCTCCTGTCACCCAG	High-Risk
T1_TTCTCCTTCTACTCAT	Background
T1_TTCTTAGAGTGGGATC	Background
T1_TTCTTAGTCAGAGACG	Background
T1_TTGCCGTGTTCCACAA	Background
T1_TTGCCGTGTTCCACGG	Background
T1_TTGCGTCAGCAACGGT	Background
T1_TTGCGTCGTCTTCTCG	Background
T1_TTGCGTCGTTCGGGCT	Background
T1_TTGCGTCTCAGCCTAA	Background
T1_TTGGAACAGGCTATCT	Background
T1_TTGGAACGTAGTACCT	Background
T1_TTGGAACTCATATCGG	Background
T1_TTGGAACTCCCAACGG	Background
T1_TTGGCAAAGTACGCGA	Background
T1_TTGGCAACAGCATGAG	Background
T1_TTGGCAAGTCATCCCT	Background
T1_TTGGCAATCGTAGGTT	Background
T1_TTGTAGGAGTCGAGTG	Background
T1_TTGTAGGAGTGGAGAA	Background
T1_TTGTAGGGTGCAACGA	Background
T1_TTTACTGCATGAAGTA	Background
T1_TTTACTGGTGCCTGGT	Background
T1_TTTACTGGTTGATTCG	Background
T1_TTTACTGTCACTATTC	Background
T1_TTTACTGTCGTGGTCG	Background
T1_TTTATGCTCCAGAAGG	Background
T1_TTTATGCTCTTACCGC	Background
T1_TTTGCGCCAGTCCTTC	Background
T1_TTTGCGCGTGATAAAC	Background
T1_TTTGGTTAGCCACCTG	Background
T1_TTTGGTTCAAATACAG	Background
T1_TTTGGTTGTTTGGCGC	Background
T1_TTTGTCAAGGGTTCCC	Background
T1_TTTGTCATCCTTTCGG	Background
T1_TTTGTCATCTAAGCCA	Background
T2_AAACCTGCACCACGTG	Background
T2_AAACCTGCAGGGTACA	Background
T2_AAACCTGCAGGGTTAG	Background
T2_AAACCTGCATGGGACA	Background
T2_AAACCTGGTCAAGCGA	Background
T2_AAACCTGGTTCGAATC	Background
T2_AAACCTGTCTCATTCA	Background
T2_AAACGGGAGGTGACCA	Background
T2_AAACGGGCAGTCTTCC	Background
T2_AAACGGGGTCCATCCT	Background
T2_AAACGGGTCATTGCCC	Background
T2_AAACGGGTCGGTGTTA	Background
T2_AAACGGGTCTGCTGCT	Background
T2_AAAGATGAGCTGATAA	Background
T2_AAAGATGAGCTTCGCG	High-Risk
T2_AAAGATGGTCGTGGCT	Background
T2_AAAGATGGTGGTAACG	Background
T2_AAAGATGTCACTTATC	Background
T2_AAAGATGTCCTAGTGA	Background
T2_AAAGATGTCTATCCCG	Background
T2_AAAGCAAAGCACACAG	Background
T2_AAAGCAAAGCGATAGC	Background
T2_AAAGCAACAAGGACAC	Background
T2_AAAGCAACACAGGCCT	Background
T2_AAAGCAACACGGTGTC	Background
T2_AAAGCAACAGATGAGC	Background
T2_AAAGCAACAGTGGAGT	Background
T2_AAAGCAAGTTTGTTTC	Background
T2_AAAGCAATCGCAAACT	Background
T2_AAAGCAATCTAGAGTC	Background
T2_AAAGTAGAGCGTGTCC	Background
T2_AAAGTAGCAATCTACG	Background
T2_AAAGTAGGTCAATACC	Background
T2_AAAGTAGGTCAGAGGT	Background
T2_AAATGCCAGACACGAC	Background
T2_AAATGCCAGATGCGAC	Background
T2_AAATGCCAGCACGCCT	Background
T2_AAATGCCAGTGACATA	Background
T2_AAATGCCCAAGCCGCT	High-Risk
T2_AAATGCCCATGCAATC	Background
T2_AAATGCCTCGGTCCGA	Background
T2_AACACGTAGAGTACAT	Background
T2_AACACGTAGTGTTAGA	High-Risk
T2_AACACGTCACAGCCCA	Background
T2_AACACGTTCCTGTAGA	Background
T2_AACACGTTCTCTAAGG	Background
T2_AACACGTTCTTAGAGC	Background
T2_AACCATGAGCTGTCTA	Background
T2_AACCATGAGGTAGCTG	Background
T2_AACCATGCATTTCACT	Background
T2_AACCATGGTAGCCTCG	Background
T2_AACCATGGTCACCCAG	Background
T2_AACCATGGTTGGACCC	Background
T2_AACCATGTCCACGTTC	Background
T2_AACCATGTCCCGACTT	Background
T2_AACCGCGCACGTGAGA	Background
T2_AACCGCGTCAGTTTGG	High-Risk
T2_AACCGCGTCCGCATAA	Background
T2_AACCGCGTCGAGAGCA	Background
T2_AACCGCGTCTGCGTAA	Background
T2_AACGTTGAGACCTAGG	Background
T2_AACGTTGCATCGGAAG	Background
T2_AACGTTGCATGGTCAT	Background
T2_AACGTTGGTCAGAATA	Background
T2_AACGTTGTCGTACCGG	Background
T2_AACGTTGTCTGATTCT	Background
T2_AACTCAGAGAAGAAGC	Background
T2_AACTCAGAGATAGCAT	Background
T2_AACTCAGGTAAACACA	Background
T2_AACTCAGGTCTTGTCC	Background
T2_AACTCAGGTTCCACAA	Background
T2_AACTCAGTCGCCTGAG	Background
T2_AACTCCCAGAGGGATA	Background
T2_AACTCCCGTCATCCCT	Background
T2_AACTCTTCAAGTACCT	Background
T2_AACTCTTCAAGTCTGT	Background
T2_AACTCTTCATTGTGCA	Background
T2_AACTCTTGTATCACCA	Background
T2_AACTCTTTCCTCGCAT	Background
T2_AACTGGTAGAGTACCG	Background
T2_AACTGGTCAAGCCTAT	Background
T2_AACTGGTGTTCGGCAC	Background
T2_AACTGGTTCATAGCAC	Background
T2_AACTGGTTCTTTAGGG	Background
T2_AACTTTCCAAGAGGCT	Background
T2_AACTTTCCACGGTAAG	Background
T2_AACTTTCCAGGGTTAG	Background
T2_AACTTTCTCGGTTCGG	Background
T2_AACTTTCTCTCAAGTG	Background
T2_AAGACCTAGAGAGCTC	Background
T2_AAGACCTAGTAGTGCG	Background
T2_AAGACCTCAACTGCGC	Background
T2_AAGACCTCACATGGGA	Background
T2_AAGACCTCACTTCTGC	Background
T2_AAGACCTCAGCGTTCG	Background
T2_AAGACCTGTTCGCTAA	Background
T2_AAGACCTTCATGTAGC	Background
T2_AAGACCTTCCTAGAAC	Background
T2_AAGCCGCAGCTAGTTC	Background
T2_AAGCCGCCATGACGGA	Background
T2_AAGCCGCGTGTCAATC	Background
T2_AAGCCGCGTTTAGCTG	Background
T2_AAGCCGCTCACCGTAA	Background
T2_AAGCCGCTCTGAAAGA	Background
T2_AAGGAGCAGCCTCGTG	Background
T2_AAGGAGCCATAGTAAG	High-Risk
T2_AAGGAGCGTATTCGTG	Background
T2_AAGGAGCGTCTACCTC	Background
T2_AAGGAGCGTGCGAAAC	Background
T2_AAGGAGCGTTCAGTAC	Background
T2_AAGGAGCTCCTGCTTG	Background
T2_AAGGAGCTCTTAACCT	Background
T2_AAGGCAGCAGGGAGAG	High-Risk
T2_AAGGCAGGTCCGCTGA	Background
T2_AAGGCAGGTTTGTTGG	Background
T2_AAGGCAGTCCCATTTA	Background
T2_AAGGTTCAGATCGATA	Background
T2_AAGGTTCAGCTGAAAT	Background
T2_AAGGTTCAGGCTCAGA	Background
T2_AAGGTTCAGTGGAGTC	Background
T2_AAGGTTCGTGTGACGA	Background
T2_AAGGTTCGTTGCGCAC	Background
T2_AAGGTTCTCGATCCCT	Background
T2_AAGTCTGCAGGTCGTC	Background
T2_AAGTCTGGTAAACGCG	Background
T2_AAGTCTGGTACCATCA	High-Risk
T2_AAGTCTGGTCGGCTCA	Background
T2_AAGTCTGTCGCATGAT	Background
T2_AAGTCTGTCTCAACTT	Background
T2_AATCCAGAGAGACTAT	Background
T2_AATCCAGCAGTAAGAT	Background
T2_AATCCAGGTTAAAGAC	Background
T2_AATCCAGGTTGTGGCC	Background
T2_AATCCAGGTTTGTTTC	Background
T2_AATCGGTAGCCACTAT	Background
T2_AATCGGTAGTTAGCGG	Background
T2_AATCGGTCACTATCTT	Background
T2_AATCGGTGTTAAGTAG	Background
T2_AATCGGTGTTAGATGA	Background
T2_AATCGGTGTTCAGCGC	Background
T2_AATCGGTTCAGAGACG	Background
T2_AATCGGTTCGAGAACG	Background
T2_ACACCAAAGCGACGTA	Background
T2_ACACCAAAGCGATTCT	Background
T2_ACACCAACACGGCCAT	Background
T2_ACACCAAGTAGGCTGA	Background
T2_ACACCAAGTCCAGTAT	Background
T2_ACACCAAGTCGTTGTA	Background
T2_ACACCAATCTGGTATG	Background
T2_ACACCCTAGCTGTCTA	Background
T2_ACACCCTCAACAACCT	Background
T2_ACACCCTCACAAGTAA	Background
T2_ACACCCTGTCGCGTGT	Background
T2_ACACCCTGTGTGTGCC	Background
T2_ACACCCTGTGTTCTTT	Background
T2_ACACCCTTCACCAGGC	Background
T2_ACACCCTTCGAACTGT	Background
T2_ACACCCTTCTCTGTCG	Background
T2_ACACCGGCAAAGGAAG	Background
T2_ACACCGGCAAGGCTCC	Background
T2_ACACCGGCATAAGACA	Background
T2_ACACCGGGTGGTACAG	Background
T2_ACACCGGGTTGGTGGA	Background
T2_ACACTGAAGACCACGA	High-Risk
T2_ACACTGAAGACTGGGT	Background
T2_ACACTGAAGCTATGCT	Background
T2_ACACTGACACTTCTGC	Background
T2_ACACTGAGTCTTTCAT	Background
T2_ACACTGATCCCTTGCA	Background
T2_ACACTGATCCGTAGGC	Background
T2_ACACTGATCCTTTCTC	High-Risk
T2_ACAGCCGAGACTAGGC	Background
T2_ACAGCCGAGAGGTACC	Background
T2_ACAGCCGAGCAGGTCA	Background
T2_ACAGCCGAGGGATCTG	Background
T2_ACAGCCGCACGGCGTT	Background
T2_ACAGCCGCATACTACG	Background
T2_ACAGCCGTCAACGCTA	Background
T2_ACAGCTACACAACTGT	Background
T2_ACAGCTACATTTGCTT	High-Risk
T2_ACAGCTAGTCGTGGCT	Background
T2_ACAGCTAGTTTAGGAA	Background
T2_ACAGCTATCAAGCCTA	High-Risk
T2_ACAGCTATCTCATTCA	Background
T2_ACAGCTATCTTTACGT	Background
T2_ACATACGAGAGCTTCT	Background
T2_ACATACGAGAGGTTGC	Background
T2_ACATACGAGGATGGTC	Background
T2_ACATACGCACAGATTC	Background
T2_ACATACGCAGCTTCGG	High-Risk
T2_ACATACGGTTGACGTT	Background
T2_ACATCAGAGACTTTCG	Background
T2_ACATCAGAGCCACTAT	Background
T2_ACATCAGAGGGTCTCC	Background
T2_ACATCAGGTTCAGTAC	Background
T2_ACATCAGGTTGGTGGA	High-Risk
T2_ACATCAGTCCAAATGC	Background
T2_ACATGGTAGTGCAAGC	Background
T2_ACATGGTCATCACCCT	Background
T2_ACATGGTGTAAACCTC	Background
T2_ACATGGTGTCGAATCT	Background
T2_ACATGGTGTCTGCAAT	Background
T2_ACATGGTGTGCTTCTC	Background
T2_ACATGGTTCAACACAC	Background
T2_ACATGGTTCAGGCCCA	Background
T2_ACCAGTAAGAGCCCAA	Background
T2_ACCAGTAAGTAGCCGA	Background
T2_ACCAGTACAAGCTGAG	Background
T2_ACCAGTACACAGGAGT	Background
T2_ACCAGTAGTCATTAGC	Background
T2_ACCAGTAGTCGTGGCT	Background
T2_ACCAGTAGTTCACGGC	Background
T2_ACCAGTAGTTCATGGT	Background
T2_ACCAGTATCAGCATGT	Background
T2_ACCAGTATCCGTACAA	Background
T2_ACCAGTATCGACCAGC	Background
T2_ACCCACTAGAACTGTA	Background
T2_ACCCACTAGATCCCAT	Background
T2_ACCCACTAGCTCTCGG	Background
T2_ACCCACTCAAAGCAAT	Background
T2_ACCCACTCACATTAGC	Background
T2_ACCCACTCAGACACTT	Background
T2_ACCCACTCAGATAATG	Background
T2_ACCCACTCAGCTGCAC	Background
T2_ACCCACTCATAAGACA	High-Risk
T2_ACCCACTTCGCATGAT	Background
T2_ACCGTAACACCCATGG	Background
T2_ACCGTAACACGTGAGA	Background
T2_ACCGTAAGTGTTCGAT	Background
T2_ACCGTAAGTGTTTGGT	Background
T2_ACCGTAATCAAAGACA	Background
T2_ACCGTAATCAACTCTT	Background
T2_ACCGTAATCGTTTAGG	Background
T2_ACCTTTACAGACGCCT	Background
T2_ACCTTTACAGCTTCGG	Background
T2_ACCTTTATCGCGCCAA	Background
T2_ACGAGCCAGGAGTACC	Background
T2_ACGAGCCAGTACTTGC	Background
T2_ACGAGCCAGTGAATTG	Background
T2_ACGAGCCAGTGTACGG	Background
T2_ACGAGCCCAAGTCTAC	Background
T2_ACGAGCCTCTTAACCT	Background
T2_ACGAGGAAGCTATGCT	Background
T2_ACGAGGAAGTAGCCGA	Background
T2_ACGAGGACACCACCAG	Background
T2_ACGAGGACAGGAATCG	Background
T2_ACGAGGACATTGCGGC	Background
T2_ACGAGGAGTAGAGCTG	Background
T2_ACGATACAGACCGGAT	Background
T2_ACGATACAGAGCTGGT	High-Risk
T2_ACGATACAGATGAGAG	Background
T2_ACGATACGTGAAGGCT	Background
T2_ACGATACTCTCTGTCG	Background
T2_ACGATGTAGCCTATGT	Background
T2_ACGATGTGTCTAGGTT	Background
T2_ACGATGTGTGTATGGG	Background
T2_ACGATGTTCAACACAC	Background
T2_ACGATGTTCTCGCATC	Background
T2_ACGCAGCAGATCCTGT	Background
T2_ACGCAGCAGTGGTCCC	Background
T2_ACGCAGCCAAGCTGAG	Background
T2_ACGCAGCGTAGTACCT	Background
T2_ACGCAGCGTGCGCTTG	Background
T2_ACGCAGCTCCGCATCT	Background
T2_ACGCAGCTCTTGTCAT	Background
T2_ACGCCAGAGGCTCAGA	Background
T2_ACGCCAGGTTTCGCTC	Background
T2_ACGCCAGTCACCGTAA	Background
T2_ACGCCGAAGCTAGCCC	Background
T2_ACGCCGACACAGGAGT	Background
T2_ACGCCGAGTAAATACG	Background
T2_ACGCCGATCAGGCAAG	Background
T2_ACGCCGATCTGATACG	Background
T2_ACGGAGAAGGCACATG	Background
T2_ACGGAGAAGTGAAGAG	Background
T2_ACGGAGAGTAACGCGA	Background
T2_ACGGAGAGTTGCTCCT	Background
T2_ACGGAGATCCTGCCAT	Background
T2_ACGGAGATCTCGCATC	Background
T2_ACGGCCAAGATTACCC	Background
T2_ACGGCCAAGGCCATAG	Background
T2_ACGGCCAAGTACTTGC	Background
T2_ACGGCCAAGTAGGCCA	Background
T2_ACGGCCACACCATGTA	Background
T2_ACGGCCACACGCCAGT	Background
T2_ACGGCCATCGGCGCTA	Background
T2_ACGGGCTAGCTTTGGT	Background
T2_ACGGGCTAGGTGCAAC	Background
T2_ACGGGCTAGTTGAGAT	Background
T2_ACGGGCTCATGTCTCC	Background
T2_ACGGGCTGTACAGTTC	Background
T2_ACGGGCTTCTCAAGTG	Background
T2_ACGGGTCAGCGAGAAA	Background
T2_ACGGGTCCAAGCGTAG	Background
T2_ACGGGTCGTGCTTCTC	Background
T2_ACGGGTCTCCTGCCAT	Background
T2_ACGTCAAAGATCTGCT	Background
T2_ACGTCAAAGGCGCTCT	Background
T2_ACGTCAAAGTTGAGAT	Background
T2_ACGTCAACAGAGTGTG	Background
T2_ACGTCAACAGCTCGCA	Background
T2_ACGTCAAGTCAAAGAT	Background
T2_ACGTCAATCAGCTCGG	Background
T2_ACGTCAATCCGCGCAA	Background
T2_ACGTCAATCGCACTCT	Background
T2_ACGTCAATCGGTGTTA	Background
T2_ACGTCAATCTAAGCCA	Background
T2_ACTATCTAGTTAGGTA	Background
T2_ACTATCTCATAGTAAG	Background
T2_ACTATCTGTCTCCATC	Background
T2_ACTATCTTCAGTTCGA	Background
T2_ACTATCTTCTTGAGGT	Background
T2_ACTGAACAGATCCCGC	Background
T2_ACTGAACAGCAGCGTA	Background
T2_ACTGAACCACTTAACG	Background
T2_ACTGAACTCTGCGGCA	Background
T2_ACTGAACTCTTTAGTC	Background
T2_ACTGAGTAGAGCTGCA	Background
T2_ACTGAGTAGCACAGGT	Background
T2_ACTGAGTAGCAGACTG	Background
T2_ACTGAGTAGTGTACGG	Background
T2_ACTGAGTCACCAGATT	Background
T2_ACTGAGTGTCTTTCAT	Background
T2_ACTGAGTGTGTAATGA	Background
T2_ACTGAGTTCAACACGT	Background
T2_ACTGAGTTCAATCACG	Background
T2_ACTGAGTTCCACTCCA	Background
T2_ACTGAGTTCCTCGCAT	Background
T2_ACTGAGTTCGTGACAT	Background
T2_ACTGATGAGACAATAC	Background
T2_ACTGATGAGAGCTGCA	Background
T2_ACTGATGAGTAGATGT	Background
T2_ACTGATGAGTGTCCAT	Background
T2_ACTGATGAGTGTGAAT	Background
T2_ACTGATGCATAAAGGT	Background
T2_ACTGATGCATGCGCAC	Background
T2_ACTGATGCATGTAGTC	Background
T2_ACTGATGGTCGGCATC	Background
T2_ACTGATGGTTCGTCTC	High-Risk
T2_ACTGATGTCTTGAGAC	Background
T2_ACTGCTCAGCACACAG	Background
T2_ACTGCTCAGCGTCTAT	Background
T2_ACTGCTCAGCTCAACT	Background
T2_ACTGCTCCAGCGTCCA	Background
T2_ACTGCTCTCTGCGGCA	Background
T2_ACTGTCCAGTTTGCGT	Background
T2_ACTGTCCCATGACGGA	Background
T2_ACTGTCCCATGCCTAA	Background
T2_ACTGTCCTCCTCGCAT	Background
T2_ACTGTCCTCTTCGAGA	High-Risk
T2_ACTTACTAGGCTCTTA	Background
T2_ACTTACTCAGCTATTG	Background
T2_ACTTACTTCCATGAAC	Background
T2_ACTTACTTCTGATACG	Background
T2_ACTTGTTAGATGCCTT	Background
T2_ACTTGTTAGGATTCGG	Background
T2_ACTTGTTCAAACTGTC	Background
T2_ACTTGTTCAGCCAATT	Background
T2_ACTTGTTCAGTCTTCC	Background
T2_ACTTGTTGTAGTACCT	Background
T2_ACTTGTTGTATCTGCA	Background
T2_ACTTGTTGTGATGTCT	Background
T2_ACTTGTTTCATGCAAC	Background
T2_ACTTGTTTCGGTGTTA	Background
T2_ACTTTCAAGAGTACCG	Background
T2_ACTTTCAAGTAATCCC	Background
T2_ACTTTCACACGTCAGC	Background
T2_ACTTTCATCAGTTTGG	Background
T2_ACTTTCATCCACTCCA	Background
T2_ACTTTCATCCGTTGCT	Background
T2_AGAATAGAGGGTCTCC	Background
T2_AGAATAGTCAGGTAAA	Background
T2_AGAATAGTCCGGCACA	Background
T2_AGAATAGTCGTTGCCT	Background
T2_AGAATAGTCTCATTCA	Background
T2_AGACGTTAGACTTTCG	Background
T2_AGACGTTGTAAATGTG	Background
T2_AGACGTTTCCGTACAA	Background
T2_AGACGTTTCTTCGGTC	Background
T2_AGAGCGAAGACAAAGG	Background
T2_AGAGCGAAGACGCAAC	Background
T2_AGAGCGAAGGGATGGG	Background
T2_AGAGCGACAGCTGGCT	Background
T2_AGAGCGAGTTCCACTC	Background
T2_AGAGCTTCACGTGAGA	Background
T2_AGAGCTTCATCGGGTC	Background
T2_AGAGCTTGTAAACCTC	Background
T2_AGAGCTTTCCTTCAAT	Background
T2_AGAGCTTTCTTCGAGA	Background
T2_AGAGTGGCACTGCCAG	Background
T2_AGAGTGGCAGATTGCT	Background
T2_AGAGTGGGTCATCGGC	Background
T2_AGAGTGGTCAATAAGG	Background
T2_AGATCTGAGAGATGAG	Background
T2_AGATCTGAGCGCCTTG	Background
T2_AGATCTGAGTACATGA	Background
T2_AGATCTGCATTCACTT	Background
T2_AGATCTGGTAATTGGA	Background
T2_AGATCTGGTATCTGCA	Background
T2_AGATCTGTCGATGAGG	Background
T2_AGATTGCAGGGAACGG	Background
T2_AGATTGCCACTGAAGG	Background
T2_AGATTGCCAGCTGCAC	Background
T2_AGATTGCGTCATACTG	Background
T2_AGCAGCCAGTACGTTC	Background
T2_AGCAGCCGTCCGAAGA	Background
T2_AGCATACAGATCCGAG	Background
T2_AGCATACAGCTGTTCA	Background
T2_AGCATACCAGGCAGTA	High-Risk
T2_AGCATACCATTAACCG	Background
T2_AGCATACGTCGCTTTC	Background
T2_AGCATACGTGCACGAA	Background
T2_AGCATACGTTAGATGA	Background
T2_AGCATACGTTATCACG	Background
T2_AGCATACTCTGGTTCC	Background
T2_AGCCTAAAGCTGAAAT	Background
T2_AGCCTAACACAGCGTC	Background
T2_AGCCTAACAGCCACCA	Background
T2_AGCCTAACAGCTTAAC	Background
T2_AGCCTAAGTACTTCTT	Background
T2_AGCGGTCCACAACGCC	Background
T2_AGCGGTCTCACCCGAG	Background
T2_AGCGGTCTCCGTACAA	Background
T2_AGCGGTCTCCTAGTGA	Background
T2_AGCGGTCTCTCGATGA	Background
T2_AGCGTATAGCTAGTCT	Background
T2_AGCGTATCAAGAGGCT	Background
T2_AGCGTATCATTCCTGC	Background
T2_AGCGTATGTATGAAAC	Background
T2_AGCGTATGTCGTCTTC	Background
T2_AGCGTATGTCTAGCGC	Background
T2_AGCGTCGAGATGAGAG	Background
T2_AGCGTCGAGCCAGAAC	Background
T2_AGCGTCGAGTGAACGC	High-Risk
T2_AGCGTCGTCACGAAGG	Background
T2_AGCGTCGTCCAGGGCT	High-Risk
T2_AGCGTCGTCTACTATC	Background
T2_AGCTCCTAGAGTTGGC	Background
T2_AGCTCCTGTTATGCGT	Background
T2_AGCTCCTGTTGCTCCT	Background
T2_AGCTCCTGTTGGTGGA	Background
T2_AGCTCCTTCTGACCTC	Background
T2_AGCTCTCAGCCAGTAG	Background
T2_AGCTCTCAGGGTGTGT	Background
T2_AGCTCTCGTAAGGATT	Background
T2_AGCTCTCGTCTCATCC	Background
T2_AGCTCTCTCACTTACT	Background
T2_AGCTCTCTCCACGAAT	Background
T2_AGCTCTCTCTGCTGCT	Background
T2_AGCTTGAAGGCAATTA	Background
T2_AGCTTGACAATACGCT	Background
T2_AGCTTGACATGAAGTA	Background
T2_AGCTTGAGTGGAAAGA	Background
T2_AGCTTGATCCGAGCCA	Background
T2_AGGCCACAGCCGGTAA	Background
T2_AGGCCACAGTAATCCC	Background
T2_AGGCCACCACGGTTTA	Background
T2_AGGCCACCACTCTGTC	Background
T2_AGGCCACGTAAGGGAA	Background
T2_AGGCCACGTCCGTTAA	Background
T2_AGGCCACTCATCTGTT	Background
T2_AGGCCACTCGTAGGAG	Background
T2_AGGCCGTTCGGACAAG	Background
T2_AGGCCGTTCTCGCTTG	Background
T2_AGGGAGTAGGCTCAGA	Background
T2_AGGGAGTAGTCCGGTC	Background
T2_AGGGAGTGTGGCCCTA	Background
T2_AGGGAGTTCTATCCTA	Background
T2_AGGGAGTTCTCGGACG	Background
T2_AGGGATGCAAGCTGTT	Background
T2_AGGGATGCAGTATCTG	Background
T2_AGGGATGGTACAGACG	Background
T2_AGGGATGGTAGCCTCG	Background
T2_AGGGATGGTCATTAGC	Background
T2_AGGGATGTCCAAATGC	Background
T2_AGGGTGAAGCTACCGC	Background
T2_AGGGTGACACCCTATC	Background
T2_AGGGTGACACTCTGTC	Background
T2_AGGGTGACATCTATGG	Background
T2_AGGGTGAGTCTAGCCG	Background
T2_AGGGTGAGTCTAGCGC	Background
T2_AGGGTGATCCAGTATG	Background
T2_AGGTCATAGAATTCCC	Background
T2_AGGTCATCACCGATAT	Background
T2_AGGTCATCAGTTTACG	Background
T2_AGGTCATGTACCCAAT	Background
T2_AGGTCATGTCCTCCAT	Background
T2_AGGTCATGTGTTTGTG	Background
T2_AGGTCATTCCTTGGTC	Background
T2_AGGTCATTCTTGAGAC	Background
T2_AGGTCATTCTTTACGT	Background
T2_AGGTCCGAGCATGGCA	Background
T2_AGGTCCGAGTGGGATC	Background
T2_AGGTCCGCAAGAAGAG	Background
T2_AGGTCCGCAGCGATCC	Background
T2_AGGTCCGCAGGTTTCA	Background
T2_AGGTCCGGTCGGCATC	Background
T2_AGGTCCGGTGCAACGA	High-Risk
T2_AGGTCCGGTGCTGTAT	Background
T2_AGGTCCGGTTGAACTC	Background
T2_AGGTCCGTCACTCTTA	Background
T2_AGTAGTCAGGCAGGTT	Background
T2_AGTAGTCGTCTACCTC	Background
T2_AGTAGTCTCAAACCAC	Background
T2_AGTAGTCTCTATCCCG	High-Risk
T2_AGTAGTCTCTCGCTTG	Background
T2_AGTCTTTCACCTCGGA	Background
T2_AGTCTTTCAGTTCCCT	Background
T2_AGTCTTTTCTCTGAGA	Background
T2_AGTGAGGAGGGTGTGT	Background
T2_AGTGAGGAGGTGTTAA	Background
T2_AGTGAGGCACCACGTG	Background
T2_AGTGAGGGTATAGGTA	Background
T2_AGTGAGGGTTATCACG	Background
T2_AGTGAGGTCGAATCCA	Background
T2_AGTGGGAAGAGTGAGA	Background
T2_AGTGGGAAGCAACGGT	Background
T2_AGTGGGAAGCAGCGTA	Background
T2_AGTGGGAAGGCAAAGA	High-Risk
T2_AGTGGGACACAACGTT	Background
T2_AGTGGGACACGAAAGC	Background
T2_AGTGGGACACGGCGTT	Background
T2_AGTGGGACAGAGCCAA	Background
T2_AGTGGGACAGCTATTG	Background
T2_AGTGGGATCCTCCTAG	Background
T2_AGTGTCAAGGAATCGC	Background
T2_AGTGTCAAGGACGAAA	Background
T2_AGTGTCAGTGATGTCT	Background
T2_AGTGTCATCCAGAGGA	Background
T2_AGTGTCATCGAGCCCA	Background
T2_AGTTGGTAGAAGATTC	Background
T2_AGTTGGTCACAAGACG	Background
T2_AGTTGGTCATCCTTGC	Background
T2_AGTTGGTGTCCCGACA	Background
T2_AGTTGGTGTGCCTTGG	Background
T2_AGTTGGTTCGGAATCT	Background
T2_AGTTGGTTCGGACAAG	Background
T2_AGTTGGTTCTATCCCG	Background
T2_ATAACGCAGAATGTGT	Background
T2_ATAACGCAGCGTAGTG	Background
T2_ATAACGCAGCTCAACT	Background
T2_ATAACGCGTAGCAAAT	Background
T2_ATAACGCTCGCAAGCC	Background
T2_ATAAGAGAGTTGTCGT	Background
T2_ATAAGAGCATCTATGG	Background
T2_ATAAGAGGTCCAGTTA	Background
T2_ATAAGAGGTCCGTTAA	Background
T2_ATAAGAGGTGAAATCA	Background
T2_ATAGACCAGCCACTAT	Background
T2_ATAGACCAGGGCTTCC	Background
T2_ATAGACCTCAACGAAA	Background
T2_ATCACGAAGAAGGGTA	Background
T2_ATCACGACAGCGAACA	Background
T2_ATCACGACAGGCGATA	Background
T2_ATCACGAGTGCAGTAG	Background
T2_ATCACGAGTTCAGTAC	Background
T2_ATCACGAGTTCATGGT	Background
T2_ATCACGATCTACCAGA	High-Risk
T2_ATCACGATCTTGTACT	Background
T2_ATCATCTAGTACCGGA	Background
T2_ATCATCTAGTAGCCGA	Background
T2_ATCATCTCACTTAACG	Background
T2_ATCATCTGTCACCTAA	Background
T2_ATCATCTTCTTCGAGA	Background
T2_ATCATGGAGACAGGCT	Background
T2_ATCATGGAGTGGACGT	Background
T2_ATCATGGCACGAAAGC	Background
T2_ATCATGGGTCATGCCG	Background
T2_ATCATGGTCACTGGGC	Background
T2_ATCATGGTCTCTGCTG	Background
T2_ATCCACCGTCCCTTGT	Background
T2_ATCCACCGTCGCCATG	Background
T2_ATCCACCTCTTGACGA	Background
T2_ATCCGAAAGGCTCATT	Background
T2_ATCCGAACATGTCTCC	Background
T2_ATCCGAAGTTGGTAAA	Background
T2_ATCCGAATCACAAACC	Background
T2_ATCCGAATCATTTGGG	Background
T2_ATCCGAATCGCAGGCT	Background
T2_ATCGAGTAGAACAATC	Background
T2_ATCGAGTGTGGCGAAT	Background
T2_ATCGAGTTCAGTTAGC	Background
T2_ATCGAGTTCGCTGATA	Background
T2_ATCTACTAGAATCTCC	Background
T2_ATCTACTAGACAGACC	Background
T2_ATCTACTAGGTGCACA	Background
T2_ATCTACTCACGTCTCT	Background
T2_ATCTACTCACGTGAGA	Background
T2_ATCTACTCAGCAGTTT	Background
T2_ATCTACTTCGTTTGCC	Background
T2_ATCTACTTCTTGCATT	Background
T2_ATCTGCCAGGACAGCT	Background
T2_ATCTGCCAGGCGATAC	Background
T2_ATCTGCCAGGTGCTAG	Background
T2_ATCTGCCAGTATCGAA	Background
T2_ATCTGCCAGTCAATAG	Background
T2_ATCTGCCTCCACGCAG	Background
T2_ATCTGCCTCGACGGAA	Background
T2_ATGAGGGCACTATCTT	Background
T2_ATGAGGGCATAGTAAG	Background
T2_ATGAGGGTCTGTACGA	Background
T2_ATGAGGGTCTTCTGGC	Background
T2_ATGCGATAGGATATAC	Background
T2_ATGCGATGTACCGAGA	Background
T2_ATGCGATGTCCTCCAT	High-Risk
T2_ATGCGATGTCTTCTCG	Background
T2_ATGCGATGTGTGCCTG	Background
T2_ATGCGATGTTACGTCA	Background
T2_ATGCGATTCGGATGTT	Background
T2_ATGGGAGAGGACGAAA	Background
T2_ATGGGAGCATCACGAT	Background
T2_ATGGGAGGTCTCTTAT	Background
T2_ATGGGAGTCCCAACGG	Background
T2_ATGTGTGCACAAGCCC	Background
T2_ATGTGTGCAGCCACCA	Background
T2_ATGTGTGGTAAGTGTA	Background
T2_ATGTGTGGTTATGTGC	Background
T2_ATGTGTGTCCCTCAGT	Background
T2_ATTACTCAGGCAAAGA	Background
T2_ATTACTCCAACACGCC	Background
T2_ATTACTCCACGTGAGA	Background
T2_ATTACTCGTATAGGGC	Background
T2_ATTACTCGTCTCATCC	Background
T2_ATTACTCTCAACCAAC	Background
T2_ATTACTCTCGCTAGCG	Background
T2_ATTATCCAGATCGATA	Background
T2_ATTATCCCAGATAATG	Background
T2_ATTATCCCATGCATGT	High-Risk
T2_ATTATCCGTAAGGGCT	Background
T2_ATTATCCGTATCACCA	Background
T2_ATTATCCGTCTGCAAT	Background
T2_ATTATCCGTTGGGACA	Background
T2_ATTATCCTCTTAACCT	Background
T2_ATTCTACAGCTTATCG	Background
T2_ATTCTACAGGCCCTCA	Background
T2_ATTCTACAGTAATCCC	Background
T2_ATTCTACTCAATCTCT	High-Risk
T2_ATTCTACTCCCAACGG	Background
T2_ATTCTACTCCTATGTT	Background
T2_ATTGGACAGGCCCTTG	Background
T2_ATTGGACCAAGGTTTC	Background
T2_ATTGGACCATTCTTAC	Background
T2_ATTGGTGCAGACAGGT	Background
T2_ATTGGTGCATGCTAGT	Background
T2_ATTTCTGAGACAGACC	Background
T2_ATTTCTGCATCCGGGT	High-Risk
T2_ATTTCTGGTGTGGCTC	Background
T2_ATTTCTGTCACAGGCC	Background
T2_ATTTCTGTCGAATGGG	Background
T2_ATTTCTGTCGCCTGTT	Background
T2_CAACCAAAGATGCCAG	Background
T2_CAACCAACATCCTTGC	Background
T2_CAACCAAGTCTAGCGC	Background
T2_CAACCAAGTTGAACTC	Background
T2_CAACCAATCAACACCA	Background
T2_CAACCAATCCGCAGTG	Background
T2_CAACCTCAGCACCGTC	Background
T2_CAACCTCAGGTACTCT	Background
T2_CAACCTCAGTCCTCCT	Background
T2_CAACCTCAGTCGTTTG	Background
T2_CAACCTCCAATGCCAT	Background
T2_CAACCTCGTTATTCTC	Background
T2_CAACTAGAGACGACGT	Background
T2_CAACTAGCAAAGGCGT	Background
T2_CAACTAGCAAGTTGTC	Background
T2_CAACTAGCAGACAAGC	Background
T2_CAACTAGCAGAGTGTG	Background
T2_CAACTAGCATACCATG	Background
T2_CAACTAGCATTACGAC	Background
T2_CAACTAGTCAGTCCCT	Background
T2_CAAGAAAAGGAATGGA	Background
T2_CAAGAAAAGGGATCTG	Background
T2_CAAGAAAAGTATTGGA	Background
T2_CAAGAAACAGTATGCT	Background
T2_CAAGAAAGTACTCGCG	Background
T2_CAAGATCAGCTCCTTC	Background
T2_CAAGATCGTTGCTCCT	Background
T2_CAAGATCTCCAAGCCG	Background
T2_CAAGATCTCCGGCACA	Background
T2_CAAGGCCAGATCGGGT	Background
T2_CAAGGCCAGTTGTCGT	Background
T2_CAAGGCCTCGGCTACG	Background
T2_CAAGTTGAGACGCACA	Background
T2_CAAGTTGCAAGCCTAT	Background
T2_CAAGTTGCATAGACTC	High-Risk
T2_CAAGTTGGTACCAGTT	Background
T2_CAAGTTGTCCAGAAGG	Background
T2_CACAAACAGACCGGAT	Background
T2_CACAAACCAAGCGTAG	Background
T2_CACAAACTCAATCACG	Background
T2_CACAAACTCAGCAACT	Background
T2_CACACAACAGTAAGAT	Background
T2_CACACAAGTCACAAGG	Background
T2_CACACAAGTCCAGTTA	Background
T2_CACACAATCAGTGTTG	Background
T2_CACACAATCATCGATG	Background
T2_CACACAATCGAATCCA	Background
T2_CACACCTAGACAATAC	Background
T2_CACACCTCAGCCACCA	Background
T2_CACACCTTCAACGCTA	Background
T2_CACACCTTCTGATTCT	Background
T2_CACACTCAGCCACGTC	Background
T2_CACACTCAGCGATCCC	Background
T2_CACACTCCAGTATGCT	Background
T2_CACACTCCATGGGACA	Background
T2_CACACTCCATGTAAGA	Background
T2_CACACTCGTATGAATG	Background
T2_CACACTCGTTCTGAAC	Background
T2_CACACTCTCACCACCT	Background
T2_CACACTCTCGCGCCAA	Background
T2_CACACTCTCGTACCGG	Background
T2_CACACTCTCTCGCTTG	Background
T2_CACACTCTCTTATCTG	Background
T2_CACAGGCGTTGGAGGT	Background
T2_CACAGGCTCCAAGTAC	Background
T2_CACAGGCTCCCAGGTG	Background
T2_CACAGGCTCCTCTAGC	Background
T2_CACAGTAAGTTTCCTT	Background
T2_CACAGTACATGCCACG	Background
T2_CACAGTAGTACTTGAC	Background
T2_CACATAGAGAAACCAT	Background
T2_CACATAGAGCAGACTG	Background
T2_CACATAGCAAGTTGTC	Background
T2_CACATAGCACTACAGT	Background
T2_CACATAGCAGTCAGAG	High-Risk
T2_CACATAGGTCAACTGT	Background
T2_CACATAGGTCTGCAAT	Background
T2_CACATAGTCAACCAAC	Background
T2_CACATAGTCAATAAGG	Background
T2_CACATAGTCTGATTCT	Background
T2_CACATTTAGAGTAAGG	Background
T2_CACATTTAGCCGTCGT	Background
T2_CACATTTCAAACGTGG	Background
T2_CACATTTCACCACCAG	Background
T2_CACATTTCACCGATAT	Background
T2_CACATTTCACGCGAAA	Background
T2_CACATTTCATCGGACC	Background
T2_CACATTTTCTACGAGT	Background
T2_CACATTTTCTGACCTC	Background
T2_CACCACTAGGATCGCA	Background
T2_CACCACTAGTCAATAG	Background
T2_CACCACTAGTCCATAC	Background
T2_CACCACTCAGTCGTGC	Background
T2_CACCACTCATAGGATA	Background
T2_CACCACTCATCGGACC	Background
T2_CACCACTCATGACGGA	Background
T2_CACCACTGTCCAACTA	Background
T2_CACCACTGTTTAGGAA	Background
T2_CACCAGGCACGGTTTA	Background
T2_CACCAGGCATCTATGG	Background
T2_CACCAGGCATCTCCCA	Background
T2_CACCAGGGTCGACTGC	Background
T2_CACCAGGTCTCAAACG	Background
T2_CACCTTGAGTGTTAGA	Background
T2_CACCTTGCACAAGCCC	Background
T2_CACCTTGCATCACCCT	Background
T2_CACCTTGGTAAACCTC	Background
T2_CACCTTGTCACGACTA	Background
T2_CACCTTGTCCCATTTA	Background
T2_CACCTTGTCGATGAGG	Background
T2_CACTCCACAACAACCT	Background
T2_CACTCCACAGGAATCG	Background
T2_CACTCCACAGTCAGCC	Background
T2_CACTCCAGTAGCCTAT	Background
T2_CACTCCAGTCCTGCTT	Background
T2_CACTCCAGTGTAAGTA	Background
T2_CAGAATCAGTCTCAAC	Background
T2_CAGAATCAGTGCCAGA	Background
T2_CAGAGAGAGACTGGGT	Background
T2_CAGAGAGCAACCGCCA	Background
T2_CAGAGAGCAGACACTT	Background
T2_CAGAGAGCAGACGCTC	Background
T2_CAGAGAGTCATTCACT	Background
T2_CAGATCAAGAATAGGG	Background
T2_CAGATCAAGATCCGAG	Background
T2_CAGATCAAGATCTGAA	Background
T2_CAGATCACATTCCTGC	Background
T2_CAGATCAGTCCATGAT	Background
T2_CAGATCAGTCGACTGC	Background
T2_CAGCAGCAGCCCTAAT	Background
T2_CAGCAGCCACGAAATA	Background
T2_CAGCAGCTCCTCTAGC	Background
T2_CAGCAGCTCTCGCTTG	Background
T2_CAGCATAAGATCCTGT	Background
T2_CAGCATAAGCCTCGTG	Background
T2_CAGCATAGTGAAATCA	Background
T2_CAGCCGAAGAGTCGGT	Background
T2_CAGCCGACAGCTCCGA	Background
T2_CAGCCGACATATACCG	Background
T2_CAGCCGATCGTAGGAG	Background
T2_CAGCCGATCTCAACTT	Background
T2_CAGCGACAGCTGGAAC	Background
T2_CAGCGACTCCATGCTC	Background
T2_CAGCGACTCGTCTGAA	Background
T2_CAGCTAAAGTTACGGG	Background
T2_CAGCTAAAGTTTAGGA	Background
T2_CAGCTAACAAGTAATG	Background
T2_CAGCTAACACCAGGCT	Background
T2_CAGCTAACACGTTGGC	Background
T2_CAGCTAACAGCGTAAG	High-Risk
T2_CAGCTAATCAACACAC	Background
T2_CAGCTAATCCAGAAGG	Background
T2_CAGCTAATCGCAGGCT	Background
T2_CAGCTAATCTTGTACT	Background
T2_CAGCTGGCATATGGTC	Background
T2_CAGCTGGGTTCACGGC	Background
T2_CAGCTGGTCCAAAGTC	Background
T2_CAGCTGGTCTGCAAGT	Background
T2_CAGGTGCAGCTAGTCT	Background
T2_CAGGTGCAGGAGCGAG	Background
T2_CAGGTGCAGTTCCACA	Background
T2_CAGGTGCCACATAACC	Background
T2_CAGGTGCCACATTAGC	Background
T2_CAGGTGCCACCGGAAA	Background
T2_CAGGTGCCACGTCTCT	Background
T2_CAGGTGCTCGAATGCT	Background
T2_CAGTAACAGTGCGTGA	Background
T2_CAGTAACAGTGCTGCC	Background
T2_CAGTAACAGTTATCGC	Background
T2_CAGTAACCACGGTAGA	Background
T2_CAGTAACCAGATGAGC	Background
T2_CAGTAACCATGGTCAT	Background
T2_CAGTAACGTTCCACTC	Background
T2_CAGTAACTCAGGTAAA	Background
T2_CAGTCCTGTGCCTGGT	Background
T2_CAGTCCTGTTGACGTT	Background
T2_CAGTCCTTCAACACGT	Background
T2_CAGTCCTTCCACGCAG	Background
[truncated: 39,987 more rows]

## Sheet: 4. Scissor Differential Genes
Gene	logfoldchanges	pvals	pvals_adj
TM4SF1	2.01244	0	0
CLDN4	2.24404	0	0
IFI27	1.85418	0	0
FXYD3	2.45076	0	0
TACSTD2	2.23072	0	0
SLPI	2.13015	0	0
KRT8	2.02591	0	0
C19orf33	2.32502	0	0
LSR	2.22867	0	0
KRT7	2.13892	0	0
KRT18	2.00339	0	0
MUC1	1.97322	0	0
MAL2	2.07739	4.2228e-307	6.70776e-305
EPCAM	1.99524	1.96836e-304	2.90333e-302
ELF3	1.86767	2.23012e-294	3.07013e-292
TSPAN1	2.06647	1.23259e-268	1.59081e-266
LMO7	1.83842	1.27322e-251	1.54659e-249
GPRC5A	1.96285	7.48066e-251	8.58198e-249
SDC4	1.74974	6.39269e-249	6.94785e-247
WFDC2	1.82292	6.75476e-246	6.97429e-244
MALL	1.8253	3.72349e-237	3.66143e-235
LCN2	1.84788	9.99717e-237	9.38371e-235
C15orf48	1.85462	2.60952e-232	2.34289e-230
MMP7	1.79824	3.84741e-230	3.31037e-228
MSLN	1.96331	1.04045e-223	8.59412e-222
LAMB3	1.8903	1.43771e-223	1.14187e-221
PDZK1IP1	1.77844	1.98507e-218	1.51821e-216
NQO1	1.66444	5.72128e-217	4.21944e-215
JUP	1.65487	7.60778e-216	5.41727e-214
TSPAN8	1.69571	3.63295e-214	2.50068e-212
SFN	1.87489	5.24628e-214	3.4947e-212
AGR2	1.77158	1.15758e-211	7.47001e-210
CTSE	1.88909	3.75294e-207	2.34843e-205
ATP1B1	1.53709	3.05916e-201	1.85799e-199
LIPH	1.85843	1.43549e-200	8.46942e-199
CEACAM6	2.02867	1.02081e-199	5.85548e-198
SDC1	1.55475	2.9892e-194	1.6683e-192
S100A14	1.67878	5.86306e-190	3.18611e-188
LGALS4	1.68851	1.41122e-181	7.47222e-180
KLF5	1.59868	7.98823e-174	4.12392e-172
S100P	1.7129	3.37918e-171	1.70195e-169
BIRC3	1.5284	3.38334e-168	1.66347e-166
ANXA4	1.2293	3.70583e-163	1.77966e-161
C12orf75	1.34025	2.33539e-161	1.09604e-159
LAMC2	1.82717	1.70653e-159	7.83107e-158
IFI6	1.18309	2.79471e-157	1.25458e-155
ITGA6	1.38886	9.80335e-155	4.30722e-153
ASS1	1.53835	7.26128e-153	3.12386e-151
TMPRSS4	1.7477	1.12429e-150	4.73806e-149
SUPT5H	1.41205	1.90128e-145	7.85228e-144
CYP3A5	1.50864	4.98542e-145	2.01861e-143
TFF2	1.82352	5.2679e-145	2.09196e-143
TMC5	1.51838	6.09867e-145	2.37618e-143
GCNT3	1.76824	7.82386e-138	2.9919e-136
LINC01133	1.76667	1.62197e-137	6.08975e-136
GPX2	1.34996	2.75476e-136	1.01582e-134
RNASE1	1.2767	2.0104e-135	7.28329e-134
PRSS22	1.77038	1.57994e-133	5.62513e-132
TFF1	1.62523	5.3185e-133	1.83045e-131
EFNA1	1.26456	8.49147e-129	2.87457e-127
STARD10	1.31633	6.45965e-128	2.15148e-126
CLDN10	1.33124	8.24873e-128	2.70375e-126
CAPN8	1.51401	9.10857e-127	2.93894e-125
ERRFI1	1.20965	9.13074e-126	2.90077e-124
CLIC3	1.52077	3.88109e-125	1.21431e-123
ITGA2	1.50685	5.44033e-123	1.67676e-121
LDLR	1.47664	4.7896e-122	1.45449e-120
SFTA2	1.53652	3.07902e-121	9.21474e-120
MUC13	1.76976	3.66835e-119	1.08216e-117
LAMA3	1.63768	3.48229e-116	1.01281e-114
ID1	1.20919	1.44972e-115	4.15788e-114
CD55	1.09304	6.61673e-115	1.87172e-113
DEFB1	1.30648	4.55731e-114	1.25478e-112
SYT8	1.46832	2.84311e-112	7.62471e-111
PIGR	1.2465	2.98136e-111	7.89296e-110
AKR1C3	1.28042	6.23327e-111	1.62933e-109
NDRG1	1.10983	3.28351e-110	8.47557e-109
F3	1.39004	7.06798e-110	1.8019e-108
PI3	1.60011	4.88877e-108	1.23113e-106
APOL1	1.1734	3.03188e-107	7.54316e-106
CXCL5	2.22655	4.9539e-107	1.21783e-105
SOX4	1.09903	3.91955e-106	9.52221e-105
TRIM29	1.89509	3.40466e-105	8.17514e-104
TFF3	1.26772	4.5636e-103	1.0832e-101
CLDN3	1.46409	2.60188e-102	6.10554e-101
AGR3	1.4201	2.84071e-102	6.59108e-101
DMKN	1.32209	1.11873e-101	2.56686e-100
PLAT	1.30364	1.55721e-100	3.53366e-99
AHNAK2	1.48321	5.50373e-99	1.22207e-97
SLC9A3R2	1.09899	9.57104e-99	2.10257e-97
SHROOM3	1.34158	4.66178e-98	1.00277e-96
VSIG2	1.50838	6.31473e-97	1.34432e-95
CCND1	1.04948	1.48211e-95	3.12301e-94
HIST1H1C	1.09212	1.12351e-93	2.29707e-92
IFI44L	1.13345	2.05121e-92	4.11238e-91
SOX9	1.19067	1.24465e-90	2.47135e-89
KLF2	1.06053	4.3603e-90	8.49435e-89
HES1	1.02109	5.55497e-90	1.07206e-88
PLA2G10	1.76566	2.06602e-87	3.91406e-86
SLC2A1	1.33198	1.42459e-86	2.67434e-85
ITGB8	1.46903	1.4747e-86	2.74347e-85
CLDN18	1.50546	1.00899e-84	1.86032e-83
AMN	1.399	1.02084e-84	1.86552e-83
REG4	1.92425	1.04536e-82	1.8771e-81
CLDN23	1.65775	5.71863e-82	1.00931e-80
TM4SF4	1.29531	1.25167e-81	2.19043e-80
SIPA1L3	1.50081	1.42577e-81	2.47412e-80
VNN1	1.45111	1.88345e-81	3.24111e-80
INSR	0.972105	4.90703e-81	8.37439e-80
EFNB2	1.34578	7.14072e-81	1.20866e-79
SDR16C5	1.6924	1.3651e-80	2.29181e-79
EMP1	0.960333	2.58025e-79	4.29695e-78
MGST1	1.07413	5.767e-79	9.52709e-78
HSPG2	0.888781	7.49454e-79	1.22827e-77
HSPA1A	0.904161	2.34102e-78	3.77672e-77
CDA	1.55446	7.94198e-78	1.27133e-76
ZG16B	1.32032	9.09308e-78	1.4444e-76
PRSS3	1.12901	1.67008e-77	2.63261e-76
BCAS1	1.59335	2.0762e-77	3.248e-76
SH3YL1	0.92066	2.3232e-77	3.60707e-76
EHF	1.41515	1.75869e-76	2.71022e-75
EPS8L1	1.24483	4.52397e-76	6.92e-75
PMEPA1	0.910142	4.02202e-75	6.10696e-74
CXCL3	1.2618	5.22314e-75	7.87283e-74
TMEM45B	1.60417	3.04132e-74	4.55097e-73
DPCR1	1.87909	6.30444e-74	9.36594e-73
TNFAIP2	1.14138	6.7773e-74	9.99651e-73
MACC1	1.46301	1.81902e-73	2.66402e-72
CEACAM5	1.90056	1.05688e-72	1.53695e-71
EDN1	1.39264	2.3297e-72	3.36422e-71
CCL28	1.52588	3.38159e-72	4.8493e-71
RASSF6	1.44442	1.50814e-70	2.1478e-69
HSD17B2	1.26897	6.42683e-69	9.09e-68
ATF3	1.01651	1.04977e-67	1.47468e-66
CRABP2	1.39283	7.18999e-67	9.96464e-66
VWA1	0.931204	7.64777e-67	1.05284e-65
CSTB	0.66071	9.40748e-67	1.28652e-65
COL17A1	1.64758	2.25518e-66	3.06378e-65
MIA	1.45934	1.13856e-65	1.53668e-64
KLF4	0.977455	1.1581e-65	1.55291e-64
TGM2	0.905582	2.46162e-65	3.27951e-64
NCOA7	0.854339	4.21774e-63	5.51242e-62
DNAJB1	0.795178	5.81485e-62	7.55199e-61
RHOV	1.5714	7.40206e-61	9.55328e-60
MMP14	0.784423	7.33495e-60	9.3498e-59
CKB	0.908506	7.44152e-60	9.42745e-59
RAMP1	0.904546	2.64265e-59	3.32748e-58
TMPRSS2	1.36015	1.59434e-58	1.99534e-57
KRT17	1.45058	5.02258e-57	6.21056e-56
MECOM	1.12912	3.86638e-56	4.72431e-55
RND3	0.967402	4.26659e-56	5.18266e-55
EGLN3	1.22561	4.00257e-55	4.83351e-54
SORBS2	0.822803	4.35864e-54	5.17276e-53
ISG15	0.724901	4.96165e-54	5.85474e-53
ARL14	1.34926	8.68695e-54	1.01924e-52
FAM3B	1.06323	2.34074e-53	2.73086e-52
AZGP1	1.16723	3.84582e-53	4.46158e-52
SAA1	1.34842	8.14008e-53	9.39065e-52
MX1	0.859163	2.22544e-52	2.55308e-51
TMEM176B	0.746364	1.16125e-51	1.32485e-50
AOC1	1.5787	3.19586e-51	3.60625e-50
KLK11	1.20222	3.79316e-51	4.257e-50
HIST1H2BD	1.07539	7.40234e-51	8.26262e-50
TM4SF5	1.36709	8.06063e-51	8.94903e-50
UGT2B7	2.3966	2.08453e-50	2.30191e-49
KLK10	1.38138	6.74357e-50	7.36797e-49
MXD1	1.08487	6.90564e-50	7.50534e-49
HSD11B2	1.49811	2.1904e-49	2.35583e-48
DUSP4	1.01317	2.96436e-49	3.17171e-48
TCN1	1.35863	3.85667e-49	4.10516e-48
PHACTR3	1.65854	1.67375e-48	1.76342e-47
SLC6A14	1.81	2.26675e-48	2.37606e-47
SLC40A1	0.756314	5.98143e-48	6.2382e-47
IL18	0.939171	7.2786e-48	7.51515e-47
MT1G	1.01225	1.04561e-47	1.07422e-46
SORD	1.12001	4.79087e-47	4.8976e-46
GRB7	1.16815	5.95366e-47	6.0563e-46
TRIB1	0.923801	6.41045e-47	6.48901e-46
HPGD	1.3143	8.05729e-47	8.11625e-46
UBD	1.33906	1.62757e-46	1.63152e-45
ANXA10	1.14677	4.36546e-46	4.35491e-45
CXCL2	0.903321	2.62337e-45	2.59199e-44
CX3CL1	1.22641	1.24218e-44	1.21569e-43
PROM1	1.02424	1.39503e-44	1.35884e-43
MT1F	0.752026	2.73356e-44	2.65015e-43
IL1RN	1.16488	1.17877e-43	1.13216e-42
SULT1C2	1.16139	1.67593e-43	1.60222e-42
HS3ST1	1.00731	2.34932e-43	2.23564e-42
PODXL	0.902205	3.26812e-43	3.09571e-42
PHGR1	1.05818	8.81686e-43	8.27583e-42
TNNC2	2.06485	1.60038e-42	1.49538e-41
KLK8	2.02082	2.12806e-42	1.97948e-41
PDE4C	1.13375	3.53948e-42	3.27759e-41
TRNP1	1.15106	4.46166e-42	4.1131e-41
SQLE	0.994094	5.15897e-42	4.73479e-41
CFB	0.898759	5.47588e-42	5.0034e-41
HMGCS1	0.96304	8.83463e-42	8.03679e-41
MUC5AC	1.2459	1.18883e-41	1.07673e-40
MXRA5	0.974292	1.79302e-41	1.61685e-40
GATM	0.733857	5.82906e-41	5.18837e-40
GADD45A	0.710044	7.15915e-41	6.3178e-40
ONECUT2	0.866428	3.29873e-40	2.87421e-39
EHD4	0.759348	8.73207e-40	7.57636e-39
PSCA	1.05753	9.01873e-40	7.79233e-39
TFPI	0.640276	1.00392e-39	8.63787e-39
NMU	1.9129	4.67969e-39	3.99321e-38
CTSB	0.514953	9.69262e-39	8.20298e-38
HYAL2	0.695161	1.79749e-38	1.50887e-37
ANKRD36C	0.903218	2.20376e-38	1.84242e-37
CA9	1.29331	2.67115e-38	2.22416e-37
DUSP6	0.718299	5.3012e-38	4.37879e-37
HIST2H2AA3	0.809855	7.23836e-38	5.95507e-37
DUOX2	0.95321	9.19245e-37	7.44409e-36
LMTK3	1.44707	2.78612e-36	2.23866e-35
GJB2	1.03451	3.60054e-36	2.88183e-35
TMEM37	0.940676	4.2863e-36	3.40431e-35
ADM	0.764091	1.78152e-35	1.3935e-34
SLC6A8	1.0144	1.86705e-35	1.45489e-34
CXCL1	1.04753	2.51546e-35	1.95279e-34
PLAC8	0.780755	3.87514e-35	2.97478e-34
LYZ	0.626036	4.96677e-35	3.79866e-34
HSPA1B	0.629322	6.64465e-35	5.06317e-34
ISG20	0.573194	1.51005e-34	1.13805e-33
MMP1	1.09124	3.48863e-34	2.61015e-33
CDHR5	1.40587	8.65242e-34	6.42707e-33
AQP3	0.942503	1.30199e-33	9.63657e-33
CEACAM1	1.08744	6.16988e-33	4.53409e-32
TRIM31	1.3199	7.84692e-33	5.74606e-32
SERPINB5	1.46437	2.67286e-32	1.95033e-31
SMIM14	0.491852	3.28432e-32	2.38807e-31
KRT23	1.25511	7.50143e-32	5.43525e-31
KIF12	0.761598	8.47693e-32	6.12058e-31
KRT16	1.67608	2.90474e-31	2.07554e-30
ZFAND2A	0.780148	3.26819e-31	2.32718e-30
KRT15	1.5702	3.44835e-31	2.44702e-30
TGFBR2	0.57848	3.87148e-31	2.73788e-30
HSPH1	0.619485	3.95363e-31	2.78643e-30
MACROD2	1.09536	7.10266e-31	4.98878e-30
AKR1B10	1.4838	8.73798e-31	6.11658e-30
AKR7A3	0.857412	1.05938e-30	7.39062e-30
MTUS1	0.599108	2.6091e-30	1.80799e-29
HK2	0.974149	9.97912e-30	6.86896e-29
CES2	0.751312	1.14126e-29	7.82958e-29
CST6	1.30862	2.01357e-29	1.37228e-28
KCNQ1OT1	0.607762	4.10334e-29	2.76909e-28
IER5	0.8056	1.03105e-28	6.89038e-28
PTGS2	1.31459	3.92571e-28	2.58997e-27
SPTSSB	1.47182	7.93598e-28	5.18601e-27
NR1D1	1.08859	1.07649e-27	7.01246e-27
NOSTRIN	0.705549	1.31328e-27	8.52805e-27
SLC12A2	0.590542	1.48555e-27	9.61646e-27
IGFBP3	0.632638	7.36004e-27	4.73473e-26
MUC20	1.11717	1.23955e-26	7.90022e-26
MT1X	0.567839	2.40291e-26	1.52209e-25
TXNRD1	0.701087	3.56464e-26	2.2442e-25
SPINK5	1.40377	4.09639e-26	2.57114e-25
LY6D	1.19346	8.36031e-26	5.20001e-25
G0S2	0.948587	1.1748e-25	7.28519e-25
KLK7	1.93244	1.74805e-25	1.07753e-24
SCEL	2.17586	1.83285e-25	1.12644e-24
SCD	0.794076	7.18832e-25	4.39168e-24
MX2	0.745356	1.05238e-24	6.39167e-24
MUC4	1.54926	1.28078e-24	7.73334e-24
RIN2	0.636145	6.66445e-24	3.96602e-23
EGFL7	0.628941	6.82189e-24	4.04805e-23
DOCK9	0.734674	7.27104e-24	4.28991e-23
SLC38A1	0.538446	7.49934e-24	4.412e-23
S100A2	0.821531	7.79913e-24	4.57534e-23
FSTL3	0.757625	9.55263e-24	5.58815e-23
PTGES	1.33188	1.22885e-23	7.16827e-23
UPK1B	1.33008	1.33449e-23	7.74077e-23
CXCL6	1.23617	1.50908e-23	8.72899e-23
RCAN1	0.664291	2.37391e-23	1.36931e-22
IRS2	0.644281	5.83801e-23	3.34875e-22
INSIG1	0.635958	6.46795e-23	3.69981e-22
TNNT1	1.12812	6.49501e-23	3.70503e-22
FBXO2	0.871508	7.21116e-23	4.10222e-22
OASL	1.11786	7.37571e-23	4.1843e-22
SERPINA1	0.502608	7.48349e-23	4.23381e-22
STEAP1	0.686472	1.59681e-22	8.96037e-22
GDF15	0.789581	2.02781e-22	1.1348e-21
KLK1	0.959673	2.75357e-22	1.53265e-21
ANKRD37	0.766209	5.24107e-22	2.90156e-21
DUOXA2	1.02356	5.76951e-22	3.18557e-21
NEDD9	0.587241	5.89174e-22	3.24439e-21
RAI14	0.601734	1.50569e-21	8.24734e-21
MT1M	0.469823	1.54646e-21	8.44826e-21
CTNNAL1	0.628563	1.55417e-21	8.46796e-21
LINC00342	1.03377	2.7308e-21	1.48008e-20
TM4SF20	1.88905	5.80547e-21	3.1383e-20
MT1E	0.48513	1.15617e-20	6.21741e-20
MCF2L	0.780836	1.23898e-20	6.62821e-20
PLAUR	0.444109	1.40387e-20	7.49095e-20
HMGA1	0.458342	1.44823e-20	7.70774e-20
GCHFR	0.512112	5.12959e-20	2.70219e-19
COL16A1	0.676891	5.38994e-20	2.83212e-19
CCL15	1.42667	5.78204e-20	3.03044e-19
TFRC	0.53237	2.99872e-19	1.54809e-18
MS4A8	1.17441	8.59998e-19	4.39578e-18
SST	0.669523	1.0157e-18	5.16604e-18
GABRP	0.862089	1.64087e-18	8.30491e-18
HIST2H2BE	0.687111	1.84646e-18	9.32258e-18
SCGB2A1	1.29038	6.34989e-18	3.15965e-17
VWA5A	0.745458	8.78231e-18	4.35949e-17
TSC22D1	0.468893	1.25981e-17	6.2237e-17
IFIT1	0.579303	1.26317e-17	6.22543e-17
PRSS23	0.416439	1.34511e-17	6.61346e-17
RDX	0.435224	2.48239e-17	1.21761e-16
CP	1.04334	3.16485e-17	1.54502e-16
AKR1C1	0.898548	4.1221e-17	1.99816e-16
DUSP5	0.707338	4.75105e-17	2.29764e-16
PLK2	0.629876	6.93238e-17	3.32915e-16
UGT2A3	0.829799	8.05495e-17	3.85927e-16
RSAD2	1.06695	8.45374e-17	4.03389e-16
OLFM4	0.296349	1.08161e-16	5.14636e-16
TNS4	1.46883	1.09542e-16	5.20009e-16
CXCL17	0.85364	1.28866e-16	6.08944e-16
SAA2	1.37388	1.33551e-16	6.29641e-16
RGS3	0.498518	1.35859e-16	6.39063e-16
SLC37A4	0.562615	2.45169e-16	1.14801e-15
C6orf222	1.33862	3.05895e-16	1.4259e-15
FOSB	0.46787	3.45187e-16	1.60543e-15
CITED4	0.491018	4.18283e-16	1.93667e-15
CCL20	0.593632	6.57317e-16	3.00967e-15
HRASLS2	1.60464	1.00676e-15	4.5893e-15
ANGPTL4	0.689184	1.3591e-15	6.16824e-15
ANXA13	1.09566	1.54558e-15	6.99916e-15
FBP1	0.407463	2.34809e-15	1.06101e-14
IL2RG	0.370458	2.88468e-15	1.29779e-14
CPEB4	0.47783	3.77504e-15	1.69467e-14
TRIM54	0.534866	4.4775e-15	2.00131e-14
PMAIP1	0.584033	4.76207e-15	2.1239e-14
LIMCH1	0.633369	6.25457e-15	2.77757e-14
FSCN1	0.533928	6.33144e-15	2.80567e-14
SEMA3C	0.656184	7.65777e-15	3.37891e-14
FAM3D	0.811319	8.448e-15	3.70385e-14
RNF39	1.4884	1.05523e-14	4.59714e-14
ICAM1	0.555055	2.50407e-14	1.06837e-13
UNC5B-AS1	1.11169	3.29966e-14	1.40202e-13
KRT6B	1.5153	4.59932e-14	1.94225e-13
SPRY1	0.496931	4.66386e-14	1.96549e-13
HMCES	0.41256	6.08358e-14	2.55337e-13
PTPRB	0.65471	6.16603e-14	2.58273e-13
SERPINA4	0.840682	8.42975e-14	3.51665e-13
AREG	0.81813	1.03142e-13	4.29414e-13
GBP4	0.578718	1.36777e-13	5.64888e-13
TMEM45A	0.610514	1.60634e-13	6.59463e-13
CKS2	0.336287	2.29666e-13	9.37275e-13
LIFR	0.808829	4.26663e-13	1.72757e-12
PNP	0.500987	5.06062e-13	2.03707e-12
SPINK4	1.06031	6.9414e-13	2.7833e-12
CRIP1	0.388798	7.47128e-13	2.98418e-12
KLK6	0.972006	1.20968e-12	4.8131e-12
SERPINE1	0.47027	1.72576e-12	6.84009e-12
GJA1	0.50763	2.33409e-12	9.23353e-12
FAM83A	1.91317	2.6087e-12	1.02805e-11
VWF	0.505868	3.59443e-12	1.40047e-11
FBXO32	0.347395	4.05574e-12	1.57131e-11
PDGFA	0.442219	7.20971e-12	2.76729e-11
ABCG1	0.468397	8.46702e-12	3.23785e-11
MUC16	1.66567	8.49761e-12	3.24354e-11
RPGR	0.551633	1.17097e-11	4.44494e-11
CTSV	1.79399	1.18233e-11	4.47984e-11
ANKRD28	0.393187	1.52477e-11	5.75623e-11
GRB10	0.483197	1.54569e-11	5.82456e-11
SLC14A1	1.19057	1.55707e-11	5.85674e-11
LIF	0.968041	1.76605e-11	6.61021e-11
PIK3R3	0.611931	2.34896e-11	8.7241e-11
PPP1R1B	0.346035	2.36856e-11	8.78112e-11
ITGA5	0.455316	2.40843e-11	8.91293e-11
RND1	1.08068	3.46429e-11	1.27746e-10
TUBB2A	0.473961	3.9342e-11	1.44815e-10
RNF186	1.48597	3.9447e-11	1.44943e-10
C5orf46	1.03298	4.32963e-11	1.58523e-10
CYYR1	0.723133	4.66088e-11	1.70048e-10
SGK1	0.329368	4.78314e-11	1.74201e-10
ATP10B	1.05523	6.82673e-11	2.47754e-10
FGGY	0.47758	8.34519e-11	3.01801e-10
FAM198B	0.422271	8.82493e-11	3.18036e-10
EPHA4	0.831317	9.9766e-11	3.5829e-10
PCSK1N	0.335707	1.09372e-10	3.92107e-10
GATA3	0.799552	1.16146e-10	4.15668e-10
NRN1	0.944777	1.37573e-10	4.89806e-10
IFIT3	0.407858	1.42034e-10	5.04821e-10
RAMP2	0.490369	1.75628e-10	6.23147e-10
RARRES2	0.331604	2.11714e-10	7.49898e-10
HBEGF	0.461157	2.27529e-10	8.03158e-10
SOX17	0.884517	2.92691e-10	1.0297e-09
BAG3	0.391212	2.92703e-10	1.0297e-09
UPK3B	1.8931	3.66675e-10	1.28773e-09
AQP1	0.361952	4.70087e-10	1.6481e-09
PLAU	0.469634	1.20574e-09	4.16362e-09
ACY3	0.776657	1.28695e-09	4.43665e-09
HMGB3	0.462116	1.35464e-09	4.66222e-09
FAM107A	0.784207	1.75446e-09	6.00822e-09
LGALS2	0.407079	1.82157e-09	6.22772e-09
PDGFB	0.726692	1.87269e-09	6.39191e-09
PTPRM	0.512351	2.06645e-09	7.03003e-09
KYNU	0.492778	2.1573e-09	7.327e-09
SLCO2A1	0.49082	2.20048e-09	7.45813e-09
DAPP1	0.472822	2.71182e-09	9.12039e-09
MT1H	0.925945	3.19873e-09	1.0723e-08
ADAMTS6	0.723202	3.7448e-09	1.24928e-08
STC1	0.589566	4.23421e-09	1.408e-08
BTNL9	0.631376	5.20206e-09	1.72151e-08
IGF2	0.672426	6.83422e-09	2.25082e-08
NRP2	0.468347	7.12229e-09	2.34196e-08
NCCRP1	2.28035	7.70786e-09	2.52647e-08
HERC5	0.694621	7.87147e-09	2.576e-08
AQP5	0.52254	8.37662e-09	2.73266e-08
EMCN	0.576142	9.14933e-09	2.98003e-08
BATF	0.361914	9.64925e-09	3.13297e-08
CMC1	0.239609	1.01639e-08	3.29489e-08
ENC1	0.371787	1.30475e-08	4.20984e-08
NMB	0.410873	1.41786e-08	4.56055e-08
ARHGAP29	0.274278	1.45502e-08	4.67281e-08
SULT1E1	1.32282	1.47365e-08	4.7253e-08
KDM6B	0.369114	1.66923e-08	5.32759e-08
SEMA7A	1.02468	1.97548e-08	6.2953e-08
NTS	0.785806	2.03945e-08	6.47918e-08
LAMP3	1.55847	2.07626e-08	6.58598e-08
RAMP3	0.473106	2.21894e-08	7.02779e-08
C2CD4B	0.921241	2.38624e-08	7.53454e-08
JAG2	0.68113	2.44705e-08	7.703e-08
ANO1	0.482938	2.58365e-08	8.12061e-08
EMB	0.294231	2.69587e-08	8.46043e-08
ECSCR	0.549013	2.73644e-08	8.57472e-08
PADI1	1.43496	2.97582e-08	9.29662e-08
CAV1	0.287739	3.2402e-08	1.0092e-07
SOX7	0.851019	3.62072e-08	1.12602e-07
CFH	0.241136	3.64813e-08	1.13284e-07
PLVAP	0.374333	3.65423e-08	1.13303e-07
FGFBP1	1.76029	3.66546e-08	1.13481e-07
SOX18	0.64023	4.57028e-08	1.4065e-07
TMEM88	0.529725	5.34036e-08	1.63618e-07
DENND2D	0.257357	5.74876e-08	1.75609e-07
CLDN15	0.335061	6.7282e-08	2.05225e-07
KRT6A	1.74064	7.31312e-08	2.22344e-07
SLC3A1	0.288581	7.32174e-08	2.22344e-07
PLCB1	0.611796	8.01955e-08	2.41757e-07
ACOT7	0.451909	8.40539e-08	2.53019e-07
LXN	0.309937	8.42012e-08	2.53094e-07
GADD45G	0.382648	1.01677e-07	3.04294e-07
COL9A3	1.03255	1.15999e-07	3.45652e-07
CPLX1	0.580841	1.77901e-07	5.27068e-07
S1PR1	0.529834	2.1083e-07	6.2284e-07
SEC14L1	0.291364	2.12443e-07	6.26705e-07
MUC6	0.298483	2.89768e-07	8.47665e-07
CDH17	0.701967	4.31452e-07	1.24958e-06
SLC4A4	0.129092	4.72882e-07	1.36383e-06
DKK1	0.996113	5.341e-07	1.53396e-06
SPRR3	1.34509	7.17511e-07	2.03246e-06
HILPDA	0.435552	8.12019e-07	2.28761e-06
CDH5	0.514326	8.73504e-07	2.45747e-06
KCNE3	0.449504	8.83649e-07	2.48263e-06
CYR61	0.211164	9.08767e-07	2.54973e-06
LMCD1	0.296215	9.55236e-07	2.67285e-06
TMTC1	0.564452	1.03468e-06	2.89122e-06
CLEC14A	0.467889	1.04851e-06	2.92196e-06
AIF1L	0.805386	1.11142e-06	3.092e-06
LEPR	0.562355	1.14057e-06	3.16568e-06
SNHG12	0.298422	1.17001e-06	3.2387e-06
SUCNR1	1.33315	1.22115e-06	3.37122e-06
GFOD1	0.545789	1.29944e-06	3.58257e-06
GGT1	0.402005	1.30781e-06	3.60084e-06
DPYSL3	0.359927	1.3532e-06	3.72086e-06
CALCRL	0.44948	1.50317e-06	4.12773e-06
HMGCS2	1.25761	1.62447e-06	4.44898e-06
CDKN2A	0.538422	1.74956e-06	4.78521e-06
NNMT	0.286092	2.09073e-06	5.69573e-06
THSD7A	0.599904	2.11443e-06	5.75269e-06
LRRC26	1.35936	2.11873e-06	5.75681e-06
DIRAS3	0.959944	2.14297e-06	5.81502e-06
SLC6A6	0.263451	2.19938e-06	5.95245e-06
THBD	0.385444	2.40998e-06	6.50538e-06
MMRN2	0.52598	2.42402e-06	6.53472e-06
CXorf36	0.562436	2.45223e-06	6.60215e-06
BDKRB2	0.756554	2.62811e-06	7.03922e-06
JAM2	0.50103	2.6282e-06	7.03922e-06
PALMD	0.51845	3.27799e-06	8.72299e-06
TM4SF18	0.460116	3.52731e-06	9.35031e-06
CA12	0.530269	3.85029e-06	1.01803e-05
NUAK1	0.502232	4.16081e-06	1.09873e-05
TNFRSF11B	1.0828	4.25459e-06	1.12206e-05
SOD2	0.24069	4.73077e-06	1.24288e-05
CASKIN2	0.484993	5.04813e-06	1.31954e-05
VCAM1	0.403615	6.08381e-06	1.58425e-05
NOTCH4	0.435571	6.68549e-06	1.73873e-05
MATN2	0.364321	7.50137e-06	1.94602e-05
TIE1	0.483278	7.54894e-06	1.9559e-05
CLDN5	0.430412	7.89123e-06	2.04203e-05
PTK7	0.357157	8.1079e-06	2.09547e-05
IL1R2	0.657743	1.08312e-05	2.79232e-05
GNLY	0.234399	1.12555e-05	2.89809e-05
SOCS3	0.273054	1.20686e-05	3.0997e-05
CD320	0.251743	1.26392e-05	3.24224e-05
CA2	0.211745	1.35284e-05	3.46172e-05
MYCT1	0.609772	1.5921e-05	4.05888e-05
GMNN	0.199911	1.61665e-05	4.11638e-05
GBP1	0.228561	1.76569e-05	4.49033e-05
ALDH1A1	0.18884	2.06816e-05	5.22736e-05
ACE2	1.1595	2.07611e-05	5.24103e-05
HLA-DRB5	0.390859	2.09348e-05	5.27842e-05
MUC17	1.05557	2.1947e-05	5.51345e-05
ERG	0.597869	2.27548e-05	5.7025e-05
SWAP70	0.194587	2.50387e-05	6.26725e-05
MIR205HG	1.0028	2.63459e-05	6.57852e-05
CD200	0.46407	2.65669e-05	6.62568e-05
CTSD	0.25826	2.70012e-05	6.72588e-05
ARL15	0.546194	2.76279e-05	6.86541e-05
SPRR1B	1.45272	3.09246e-05	7.66618e-05
CSTA	0.224989	3.09675e-05	7.66761e-05
TGFBR3	0.38103	3.20652e-05	7.92989e-05
HIF3A	0.52766	3.2262e-05	7.96903e-05
ADM5	0.611652	3.47556e-05	8.56447e-05
RASGRP3	0.321795	3.51025e-05	8.63966e-05
TEK	0.571603	4.09991e-05	0.000100431
CREB5	0.368196	4.2853e-05	0.000104724
CLU	0.135828	4.6769e-05	0.000114158
KANK3	0.603373	5.27171e-05	0.000128107
PIP	1.70539	5.30509e-05	0.000128731
MSMB	0.917099	5.33111e-05	0.000129211
CTSZ	0.184112	5.51993e-05	0.000133318
GPR146	0.605803	5.57775e-05	0.000134557
CEACAM7	0.810457	5.60962e-05	0.000135168
LYPD3	1.2546	5.80167e-05	0.000139632
FOLR1	0.678683	6.93798e-05	0.000165629
ROBO4	0.562584	7.08995e-05	0.000168867
POU2F3	1.3865	7.30938e-05	0.000173692
HLA-G	1.95768	7.84934e-05	0.000185669
MMP3	1.00875	7.87241e-05	0.000186002
CD34	0.449632	8.22899e-05	0.000194204
RBP7	0.403887	9.24629e-05	0.000217467
EREG	0.497822	9.39283e-05	0.000220662
ZC3HAV1	0.157136	0.000101707	0.000238123
COL15A1	0.257872	0.000132665	0.000308507
VEGFC	0.858598	0.000137446	0.000318906
CPS1	1.33658	0.0001379	0.000319601
CXCL11	1.14552	0.000139088	0.000321993
ITGA10	0.629052	0.000144637	0.000333715
C1orf56	0.192328	0.000154352	0.000354942
RARRES1	0.252002	0.000155617	0.000357102
GSTA1	0.414472	0.000155638	0.000357102
BEX5	0.326312	0.000158723	0.000363778
NEIL1	0.257612	0.000163436	0.000373749
CCL14	0.820861	0.000165668	0.000378016
LY6K	0.850911	0.000169956	0.000387371
SIPA1L2	0.303902	0.000170318	0.000387769
ADCY4	0.394867	0.000171683	0.000390447
DCDC2	0.387028	0.000175189	0.000397109
MCTP1	0.451675	0.000201611	0.00045401
SLC7A11	0.617137	0.000242859	0.000542754
FAM167B	0.327041	0.000257296	0.000573157
FLT1	0.419459	0.00025872	0.000575709
PGC	0.199354	0.000286425	0.000635304
ODAM	0.87398	0.000301039	0.000665574
KRT13	0.959398	0.000321884	0.000710139
TNFRSF25	0.266387	0.000343882	0.000757861
COL11A1	0.515261	0.00034449	0.000758392
LINC00261	0.666936	0.00035739	0.000785118
LDB2	0.370597	0.000389895	0.000855615
ECM1	0.321806	0.000399949	0.000876317
ITPKA	1.12898	0.000400178	0.000876317
AKR1C2	0.766703	0.000413457	0.00090348
FAM110D	0.601851	0.000424327	0.000925276
CRCT1	1.99743	0.000447165	0.00097302
EGR3	0.467715	0.00052279	0.00113161
ST6GAL1	0.173905	0.000549655	0.0011848
CFTR	0.0772152	0.000595769	0.00127886
MAGEA4	1.86212	0.000623865	0.00133639
SERPINB2	1.59771	0.000681133	0.00145605
NR4A1	0.137133	0.000765084	0.00162541
QPCT	0.276868	0.000773159	0.00164088
INHBB	0.470735	0.000778149	0.00164977
BICC1	0.184467	0.000794182	0.00167859
TK1	0.259184	0.000800095	0.00168936
CD93	0.299325	0.000818783	0.00172706
SSR4	0.192753	0.000858166	0.00180828
ARHGEF15	0.502247	0.000944995	0.00197912
HES6	0.556904	0.000962825	0.00201442
RRAD	0.671877	0.00103809	0.00216095
LYNX1	0.834828	0.00105591	0.00219362
STMN1	0.11042	0.00105845	0.00219668
UGT2B15	0.873411	0.00123467	0.0025547
ALDOB	0.493795	0.00125035	0.00258456
RTKN2	0.779404	0.00126648	0.00261527
SCTR	0.116963	0.00127012	0.00262018
C6orf15	1.99555	0.00129092	0.00266042
IL33	0.469957	0.00131384	0.0026969
NOV	0.446956	0.00131605	0.00269874
TSPAN7	0.408084	0.00132957	0.00272378
RASIP1	0.43549	0.00136716	0.00279523
ZNF385D	0.484505	0.00150267	0.0030592
FSTL1	0.151139	0.00154295	0.00313292
CCK	1.10591	0.00155554	0.0031554
KIAA1324	0.416226	0.00163248	0.00330497
REP15	1.23126	0.00164294	0.00331963
UBE2S	0.167959	0.00164786	0.00332633
SERPINA5	0.120357	0.00166435	0.00335633
MMP2	0.162655	0.00192519	0.00386723
LGMN	0.109832	0.0021451	0.00429644
TMEM158	0.453834	0.00214872	0.00429952
BCAM	0.135061	0.00222866	0.00445517
SLC15A3	0.191869	0.00226567	0.00452476
EDN2	1.14414	0.00228249	0.00454955
SAA4	1.28075	0.00236756	0.00470098
NOS3	0.556161	0.00265044	0.00522746
GUCA2B	1.59565	0.00278996	0.00547129
HIST1H2BJ	0.693528	0.00282521	0.00553516
CNTNAP3B	0.713188	0.00292133	0.00570183
TMEM154	0.0946162	0.00293323	0.00571966
MMP11	0.213249	0.0033114	0.00641467
AMY2B	0.538348	0.0038992	0.00750405
SHE	0.539401	0.00410278	0.00788115
ADAM12	0.531239	0.00420162	0.00806352
POSTN	0.193673	0.00421909	0.00808137
SPON2	0.0775138	0.004487	0.00856345
ICAM2	0.177882	0.0047303	0.00901114
SERPINB7	1.34841	0.00483835	0.00920848
FAM46A	0.135919	0.00516952	0.00981163
CCDC71L	0.215252	0.00533168	0.0100823
GPIHBP1	0.922746	0.00534468	0.0100977
IL23A	0.935145	0.00574971	0.0108134
COL12A1	0.260888	0.00584354	0.0109799
ALOX5	0.0676443	0.00586995	0.0110195
C11orf53	1.01635	0.00607903	0.011381
SERPINH1	0.143371	0.00614155	0.0114876
LIMS2	0.264396	0.00631497	0.01178
ALDH1A3	0.356939	0.00636783	0.0118678
C16orf74	0.458512	0.00647242	0.0120519
BTG2	0.0893224	0.00660396	0.0122857
IAPP	0.494018	0.00682172	0.012668
BCL6B	0.497385	0.00702987	0.0130393
KRT5	1.01423	0.00703426	0.0130393
PREX2	0.482198	0.00722756	0.0133856
ANLN	0.813565	0.00737337	0.0136068
DLL4	0.574504	0.00741311	0.0136679
NPW	0.686604	0.00780507	0.0143394
PKIB	0.186022	0.00808573	0.0148418
HSPA6	0.44425	0.00843728	0.0154596
GATA2	0.627762	0.00847366	0.0155125
CTHRC1	0.124943	0.00879407	0.0160706
ATOH8	0.501346	0.00933696	0.0169725
GP2	0.367311	0.0094299	0.0171114
LINC00926	0.040188	0.00970861	0.0175862
LBH	0.041002	0.00981395	0.0177614
GZMB	0.0611675	0.0100085	0.0180503
MUC5B	0.219267	0.0102953	0.0185513
REG1A	0.172472	0.0114056	0.0204983
S100A7	1.82595	0.011837	0.0212551
SCD5	0.19323	0.011907	0.0213437
KLK5	1.72031	0.0119412	0.0213736
TSPAN18	0.51543	0.0119842	0.0214262
SNCG	0.13311	0.0124357	0.022195
CLDN2	0.328436	0.0132025	0.0234623
JSRP1	0.639895	0.0134044	0.0238006
HECW2	0.356964	0.0138649	0.0245338
COMP	0.206684	0.0139769	0.0247109
F2RL3	0.342255	0.0140039	0.0247162
IL3RA	0.287863	0.0145847	0.0256755
SNRK	0.108945	0.0147984	0.0260295
TRIB3	0.247463	0.0150284	0.0264117
DHRS9	0.549976	0.0154045	0.0270036
KDR	0.308406	0.0156977	0.027471
PTPRG	0.141208	0.0158494	0.027696
ITPRIP	0.219188	0.015956	0.0278521
RUNX2	0.269559	0.0170303	0.0296273
MFAP2	0.183409	0.0175906	0.0305249
RGCC	0.0905167	0.0179186	0.0310679
CXCL12	0.207973	0.018585	0.0321693
SLC34A2	0.522615	0.0193117	0.0333434
APOBEC3C	0.0123985	0.0204753	0.0351175
SOSTDC1	1.22374	0.0211332	0.0361858
CTRL	1.0352	0.021192	0.0362565
PDIA2	0.683913	0.0219096	0.0374222
HEY1	0.378965	0.0222565	0.0379519
ITM2A	0.0515142	0.0224276	0.038212
F8	0.347534	0.0241147	0.0408505
PNMT	1.69984	0.0260857	0.043973
BCAT1	0.189538	0.0273949	0.0460296
SEMA3G	0.75122	0.0286213	0.0479365
HBA2	0.171442	0.0293885	0.0490998
VSIG1	0.369476	0.0301014	0.050169
C1QTNF3	0.0967499	0.0310495	0.0516658
DLL1	0.321236	0.0311018	0.0517111
SLC26A2	0.178356	0.0314159	0.0521913
SPRR1A	0.946604	0.0317096	0.0526369
DNAJB4	0.0812798	0.0320312	0.053128
RAPGEF4	0.382379	0.033073	0.0546803
PRKCH	0.0835587	0.0334994	0.0552967
HEG1	0.161499	0.0335453	0.0553201
ZEB1	0.0961656	0.0343984	0.0565547
ZBP1	0.279818	0.0347027	0.0570096
KLHDC7B	0.942824	0.0351804	0.0576751
LPAR5	0.13259	0.0355441	0.0582067
SHANK3	0.340638	0.0361196	0.0590554
ERP27	0.216982	0.0370016	0.0604097
CELA3B	0.386993	0.0371004	0.0604675
NFATC2	0.124074	0.0375643	0.0611752
FAM43A	0.182766	0.038902	0.0632043
FCGBP	0.0265131	0.039024	0.0633526
IGFBP2	0.078631	0.0407045	0.065822
PTPRE	0.0539818	0.0409772	0.0662113
ANPEP	0.0818823	0.0417052	0.0672297
ASB9	0.391401	0.0445411	0.0714111
TNNC1	0.654455	0.0458187	0.0733455
CLEC3B	0.501452	0.046001	0.0735802
UBE2C	0.12143	0.0461279	0.073726
SKAP1	0.0399035	0.0463821	0.0740665
SASH1	0.16572	0.0466354	0.0743072
CSF3	1.34069	0.047019	0.0748309
VNN2	0.111308	0.0470365	0.0748309
SCG5	-0.00827156	0.0475438	0.0755796
GIMAP6	0.211129	0.0479089	0.076043
HBB	0.0301261	0.0479666	0.076076
MMP23B	0.183006	0.0493649	0.0780539
HOMER2	0.0845197	0.0496695	0.0784755
GREM1	0.338092	0.0503032	0.079416
ALPL	0.528156	0.0518572	0.0816821
KRT86	0.89686	0.0525564	0.0827202
CELA2B	0.82571	0.0531048	0.0835198
CDH19	1.24236	0.0534048	0.0839276
LYPD2	1.23655	0.0534675	0.0839623
MYOM2	0.543542	0.053785	0.0843967
ITGB2-AS1	0.158233	0.0543475	0.0852145
RASA4	0.138469	0.0549452	0.0860211
GIMAP8	0.330693	0.055056	0.0861292
RBP4	0.0692956	0.0576311	0.0898175
STC2	0.311049	0.0578001	0.090013
EPAS1	0.0726457	0.0579782	0.0902223
ADRB2	0.501787	0.0606556	0.0941051
LOX	0.289465	0.0623959	0.0966599
AQP8	1.15917	0.0639321	0.0988912
IDO1	1.11173	0.0653016	0.100907
IGFL2	0.312523	0.0661885	0.102076
SYCN	0.308138	0.0664339	0.102378
SLC19A2	0.186661	0.0670303	0.103075
CSAG1	1.17105	0.0684	0.104938
TMC8	-0.0124638	0.0688069	0.105483
CELA2A	0.510981	0.0704221	0.1078
PRAP1	0.345182	0.0727096	0.110972
REG3A	0.346385	0.0736898	0.112054
PIK3IP1	-0.103095	0.0744868	0.113183
PLA1A	0.539819	0.0749362	0.113666
MMP10	1.31152	0.0750251	0.113666
CRYM	0.59828	0.0756826	0.114578
PALLD	0.0354114	0.0789058	0.119109
SPOCK1	0.343292	0.0790622	0.11917
SELE	0.966536	0.0797546	0.120126
MYBPC1	0.968182	0.0813397	0.122335
MMP9	0.196806	0.081407	0.122347
PNLIPRP1	0.341394	0.0826878	0.124182
SELPLG	0.0263791	0.0827564	0.124195
MEST	0.0571298	0.0849867	0.127357
CXCL14	-0.0609763	0.085906	0.128362
CST1	-0.0032729	0.0891036	0.132583
PTGDS	-0.0772734	0.089605	0.133118
ATF5	0.000112667	0.0900292	0.133556
SSUH2	0.924414	0.0901506	0.13364
CUZD1	0.528242	0.0906745	0.134128
CTGF	0.00666082	0.091619	0.135428
BCAS4	-0.11265	0.0916872	0.135432
LMO2	0.120177	0.0952138	0.14034
GAS1	0.302769	0.0969355	0.142572
CENPF	0.274209	0.0973356	0.142957
BCYRN1	0.770822	0.0975519	0.143173
BDKRB1	0.692025	0.100343	0.147165
ADAMTS9	0.109731	0.100468	0.147244
RIC3	-0.118922	0.102609	0.150274
HIF1A-AS2	0.83944	0.102986	0.15072
KISS1	1.19502	0.103721	0.15158
SERPINB3	0.694693	0.104025	0.151918
ALB	0.638341	0.105059	0.15321
CRTAC1	0.837649	0.105397	0.153596
LIPG	0.583237	0.105842	0.154135
UNC5B	0.164495	0.106085	0.15438
CPA1	0.296818	0.106948	0.155417
ENPP1	0.357337	0.107504	0.156006
RASSF5	-0.0681685	0.109212	0.15815
KRT81	1.03923	0.110721	0.160224
TMEM178A	1.00195	0.112165	0.162199
TNXB	0.168368	0.112403	0.16243
TUBB2B	0.702228	0.11373	0.163901
CD163L1	0.377119	0.113739	0.163901
CCNB1	0.189238	0.113847	0.163943
AMY2A	0.358441	0.118148	0.169545
SERPINI2	0.965656	0.121809	0.17438
MFAP5	0.0908174	0.121855	0.17438
GSTA2	0.773574	0.127454	0.181386
DYSF	0.20742	0.127762	0.181574
RHOJ	0.168285	0.13206	0.1864
SOCS2	0.152912	0.136	0.191308
IFIT2	0.0661864	0.136943	0.192242
ESAM	0.0647801	0.13787	0.19328
KRT14	1.22627	0.138814	0.193946
SELP	0.3581	0.14147	0.197522
LRRC15	0.601251	0.142309	0.198559
CLIC2	0.11155	0.142807	0.199119
FAM177B	0.137515	0.143528	0.19999
PTHLH	0.501889	0.144959	0.201848
RASGRP1	0.183851	0.147097	0.204548
PLEKHF1	0.00329172	0.147799	0.205387
NR4A2	-0.0104258	0.14835	0.206015
CNGA1	0.168464	0.15292	0.211648
RAB3C	0.523622	0.157308	0.21714
LGALS7B	0.499676	0.157754	0.21761
COL10A1	0.153604	0.161693	0.222449
APLNR	0.141162	0.162488	0.223394
CHI3L1	0.261765	0.164459	0.225803
PXDN	0.105069	0.165193	0.226359
PTTG1	-0.0175228	0.166057	0.227392
CPA2	0.265276	0.169623	0.231422
FGL1	1.11649	0.171574	0.233245
SIDT1	0.316311	0.173095	0.235003
CALML5	1.30181	0.173397	0.235157
PRX	0.543661	0.173435	0.235157
BMX	0.445342	0.174178	0.236009
HOTAIRM1	-0.00559796	0.176861	0.239174
C4BPA	0.398609	0.17956	0.242347
CEL	0.353114	0.181628	0.244499
CDH13	0.286287	0.183377	0.246692
PCDH20	0.97511	0.18507	0.248646
FNDC1	0.248341	0.196177	0.262373
LAIR2	0.104662	0.202696	0.270568
IL11	0.828334	0.203143	0.270989
NELL2	0.306733	0.204639	0.272808
FZD4	0.1398	0.206113	0.274595
CLPS	0.191738	0.206387	0.274784
ARL4D	0.149351	0.215788	0.28601
BIRC7	0.457491	0.216213	0.286388
TNFAIP3	-0.0221971	0.216966	0.287202
PCDH17	0.105391	0.218658	0.289071
GPA33	0.630949	0.218898	0.289203
CCNB2	0.23342	0.219874	0.290121
ACVRL1	0.0955087	0.221506	0.291901
THBS2	0.140766	0.227228	0.29868
LRRC17	0.192506	0.234655	0.307464
PAEP	0.68652	0.24061	0.315066
OLFM1	0.145264	0.243637	0.318626
PHGDH	-0.00627213	0.247927	0.324031
PCK1	0.332447	0.249977	0.326504
TMEM47	0.0168276	0.254232	0.331433
EPYC	0.570523	0.255389	0.332311
SNX29P2	-0.157689	0.256455	0.333489
CENPW	0.063994	0.257231	0.334287
TUSC3	-0.0122055	0.259448	0.336544
MME	0.356905	0.259456	0.336544
IL6	0.287021	0.26224	0.339302
TNC	0.169248	0.264974	0.341982
MMRN1	0.39679	0.272557	0.350673
KLRF1	0.386103	0.276021	0.354468
TCF7	-0.127548	0.281113	0.360111
TNFRSF4	-0.0247162	0.285455	0.363643
ITM2C	-0.0140409	0.291198	0.369363
SERPINB4	0.734196	0.295082	0.373602
FABP2	0.549554	0.304149	0.384139
GJA5	0.384618	0.30551	0.385623
TOP2A	0.0158634	0.308038	0.388407
TLL1	0.50313	0.308093	0.388407
ACKR3	0.117515	0.315379	0.397108
FCN3	0.158072	0.315684	0.39725
MAF	0.0110942	0.321423	0.402999
PLA2G1B	0.16895	0.327226	0.409528
LTF	0.0525797	0.331	0.413499
ZBED2	0.65513	0.339078	0.422823
PRC1	0.126348	0.340097	0.423839
SH2D3C	0.0531082	0.349398	0.434643
DNASE1L3	0.369529	0.350958	0.436058
SCT	0.536075	0.351636	0.436638
ITGBL1	-0.0175921	0.355648	0.441088
PLCG2	-0.0861642	0.358232	0.44376
LTBP2	0.0403506	0.363877	0.450484
ARHGEF39	0.377673	0.373352	0.460832
TNFRSF18	-0.108819	0.380258	0.467401
REG3G	0.3435	0.383417	0.470164
CLDN14	0.766385	0.384581	0.471032
LOXL2	0.0854629	0.386639	0.472763
TWIST1	0.228614	0.386681	0.472763
SNAI1	0.0971734	0.391801	0.478456
TNFSF4	0.389263	0.393017	0.479658
FDCSP	0.633771	0.396994	0.483939
CALB2	0.259419	0.405016	0.492555
IL18R1	0.0510895	0.406415	0.493965
NES	0.0710684	0.40756	0.494775
IGFBP1	0.574425	0.41218	0.499796
TNF	0.122168	0.422006	0.509616
HEPACAM2	0.163742	0.437219	0.525223
PNLIP	0.152406	0.456706	0.546081
CEBPA	-0.0314331	0.456963	0.546081
ABI3BP	0.0114682	0.461166	0.549831
PCDH12	0.0905234	0.465082	0.55418
CHST1	0.116518	0.474254	0.564458
CDC20	0.134822	0.481809	0.571835
ITGA11	0.271349	0.481838	0.571835
KCNJ15	-0.111404	0.486623	0.576074
COL8A1	0.0382019	0.487583	0.576666
CADM3	0.504947	0.494929	0.584016
MRC2	0.0778095	0.501842	0.591013
PATL2	-0.00281001	0.503063	0.591923
LEFTY1	-0.167378	0.504171	0.592889
GCG	-0.0344677	0.504735	0.593215
TPX2	0.0137203	0.507937	0.59596
DIO3	0.514924	0.542753	0.632141
KCNN3	0.117665	0.543608	0.63278
S100A9	0.00894972	0.545611	0.634728
FRMD3	-0.115499	0.545897	0.634728
FBLN2	0.00489813	0.559959	0.648887
MIAT	-0.0682052	0.568365	0.656051
ADH6	0.228677	0.569503	0.656687
CCL23	0.250567	0.571865	0.658618
SFRP5	-0.155282	0.574677	0.660589
RSPO3	0.16341	0.574856	0.660589
PDGFRA	-0.0438358	0.580184	0.66597
PTPRN	0.174133	0.58113	0.666685
RBP5	0.017273	0.596547	0.679464
ASPM	0.00631561	0.605888	0.688965
BIRC5	-0.0412965	0.607569	0.690495
EDIL3	0.0232214	0.610097	0.692987
TNFRSF9	0.293964	0.610759	0.693357
LOXL1	-0.0452961	0.619484	0.701334
CTRB1	0.161264	0.620253	0.701627
PPP1R1A	0.373845	0.620422	0.701627
PRCP	0.000520165	0.625536	0.705479
HBA1	-0.106371	0.626979	0.706721
COL8A2	0.134808	0.633667	0.711376
HMMR	0.0490746	0.63679	0.713888
LY6H	0.217763	0.641643	0.718543
STRA6	0.143437	0.644172	0.720454
ZWINT	-0.135296	0.659375	0.734707
HAS2	0.0901271	0.659635	0.734707
CTRC	0.107403	0.660646	0.735436
CA3	0.336498	0.661055	0.735495
GIMAP5	-0.0241257	0.672383	0.744888
CD300LG	0.454048	0.675049	0.74704
RAB37	0.0381382	0.676987	0.747982
PCOLCE2	0.0450299	0.680095	0.751014
KLK4	0.563504	0.681108	0.751066
COL5A1	0.0596449	0.685322	0.754767
KRT20	0.29609	0.695897	0.764783
FGA	-0.154717	0.697576	0.76622
RBP2	0.22888	0.698813	0.767171
BCL11B	-0.0971784	0.709409	0.775463
P2RY6	0.00931421	0.709746	0.775463
FGFBP2	-0.0122456	0.721052	0.786152
ABCC8	-0.0445053	0.722018	0.786375
PAX6	-0.00868119	0.732789	0.796462
RNGTT	-0.142439	0.73849	0.800936
KLRC2	-0.141362	0.741096	0.802505
CXCL13	-0.274605	0.741999	0.803032
NCAM1	0.194168	0.742423	0.803032
BPIFB1	0.2235	0.743533	0.803032
NTM	0.0715999	0.74432	0.803461
FGFR1	-0.0288073	0.751052	0.809723
NLGN4X	0.13896	0.751298	0.809723
TPPP3	-0.123719	0.753309	0.811467
NEURL1B	-0.0469231	0.753857	0.811634
PDPN	0.0359849	0.760077	0.817479
MKI67	-0.0889194	0.763606	0.82042
CYB561A3	-0.191147	0.764731	0.820665
FABP1	0.094992	0.76727	0.822644
SOX11	0.386762	0.768755	0.823382
MIR7-3HG	-0.142834	0.77279	0.826417
FAM46C	-0.285494	0.775045	0.827971
COL13A1	-0.0431759	0.777809	0.829647
CST4	0.277042	0.777819	0.829647
SCUBE3	0.244667	0.78855	0.837873
AURKA	-0.00701022	0.792743	0.84066
STAB1	-0.103816	0.796885	0.843703
CENPE	0.000517491	0.798633	0.844865
CCL22	0.241898	0.802895	0.848504
MADCAM1	0.0686416	0.804145	0.848957
TPSAB1	-0.0750776	0.807623	0.850889
GABRA2	0.1965	0.80874	0.851631
NFATC1	-0.127631	0.81106	0.853639
PHLDB1	-0.0864203	0.813578	0.855417
CILP	0.0272518	0.817086	0.858232
KLRD1	-0.363359	0.819318	0.860138
PASK	-0.138454	0.821171	0.861275
ALOX15B	-0.0389328	0.821235	0.861275
PLK1	-0.00881339	0.8233	0.862565
CCL18	-0.415848	0.8338	0.872238
DLK1	-0.203984	0.838747	0.876081
CDKN3	-0.135072	0.848807	0.883698
NKX2-3	0.00358164	0.849035	0.883698
SERPINE2	-0.0796774	0.849676	0.88392
SLFN12L	-0.103478	0.851056	0.884497
G6PC2	-0.166509	0.851087	0.884497
CLDN11	0.0207958	0.852948	0.885539
SERPINA6	-0.204373	0.859593	0.889735
CDCA8	-0.0694274	0.862756	0.891688
CENPA	-0.0569991	0.864762	0.893229
CA4	-0.0877658	0.865113	0.893229
SERPINB9	-0.183473	0.872333	0.898438
VSNL1	0.113521	0.87602	0.901785
AVIL	-0.0484218	0.87655	0.901881
CHIT1	-0.325202	0.882877	0.907938
XBP1	0.00578468	0.889946	0.914298
SLC30A8	-0.252972	0.895706	0.918844
ALG9	-0.236826	0.897501	0.920201
TNIP3	-0.0488255	0.89792	0.920201
SHISA2	0.00821735	0.901539	0.923155
MTRNR2L1	0.00300275	0.903693	0.924283
KIT	0.0597933	0.906721	0.926462
CYTL1	0.0440274	0.908143	0.927455
SH2D6	-0.0984956	0.909082	0.927955
KPNA2	-0.10499	0.925916	0.942809
LEF1	-0.148387	0.927134	0.943119
NRARP	-0.163731	0.928211	0.943285
FZD1	-0.0618975	0.929959	0.944597
DLX5	-0.139777	0.937796	0.950687
SLA2	-0.402385	0.939682	0.952131
TMSB15A	-0.0947935	0.945418	0.957004
NPR3	-0.0209016	0.953469	0.963736
GC	-0.295287	0.95406	0.963862
HHIP	-0.0742866	0.955935	0.964341
NREP	-0.102417	0.95795	0.965902
IFNG	-0.367251	0.96415	0.970731
DLGAP5	-0.118952	0.967168	0.972347
ID2	0.00245779	0.979017	0.983303
FGG	-0.0650804	0.980955	0.98477
GUCY2C	-0.260736	0.982305	0.985647
ABCB4	-0.329215	0.988793	0.990712
SLAMF9	-0.294966	0.995282	0.995764
FKBP11	-0.140742	0.999318	0.999318
WISP2	-0.124515	0.99509	0.995764
LINC00426	-0.325354	0.994879	0.995764
PROX1	-0.20357	0.984782	0.987172
FGF19	-0.244448	0.984773	0.987172
NPTX2	-0.23505	0.977239	0.981994
GZMH	-0.363893	0.966443	0.972092
SLC2A14	-0.203512	0.965374	0.97149
APBA2	-0.303516	0.96227	0.969311
LUCAT1	-0.269961	0.960476	0.967976
PADI2	-0.169117	0.955893	0.964341
PLA2G2A	-0.243289	0.955703	0.964341
VTN	-0.20975	0.952899	0.963631
SLAMF6	-0.517359	0.951279	0.962465
SFTA1P	-0.472689	0.941127	0.953127
NUF2	-0.167924	0.93645	0.949788
CXCL10	-0.275128	0.933492	0.947254
DMBT1	-0.289719	0.93297	0.947189
XCL1	-0.329157	0.927751	0.943283
ECEL1	-0.364618	0.926974	0.943119
HP	-0.203699	0.921205	0.938475
AP003774.1	-0.486655	0.918826	0.936514
SULF1	0.000124699	0.913662	0.931709
SIDT1-AS1	-0.574305	0.909576	0.928001
NUAK2	-0.288731	0.904418	0.924566
SCGN	-0.36466	0.903261	0.924283
NKX2-2	-0.457871	0.901697	0.923155
IFITM1	-0.014082	0.893269	0.916799
MIR503HG	-0.0904864	0.89225	0.916209
CD70	-0.405168	0.889692	0.914298
CYP3A4	-0.323155	0.869854	0.896332
CHGB	-0.50279	0.867077	0.893916
LTBP1	-0.139117	0.866728	0.893916
C11orf21	-0.641867	0.866625	0.893916
CDCA3	-0.285292	0.861828	0.891174
S1PR5	-0.445239	0.860006	0.889735
LAT	-0.315417	0.859003	0.88959
CHGA	-0.528827	0.858793	0.88959
NSG1	-0.283317	0.85782	0.889257
APOBEC2	-0.275523	0.854338	0.886092
PEG10	-0.219013	0.853981	0.886092
LINC00671	-0.314022	0.852895	0.885539
CELA3A	0.0671362	0.848023	0.883535
CTSS	-0.00833855	0.846628	0.882528
CHRDL1	-0.272583	0.845598	0.881899
FST	-0.179613	0.839862	0.876359
IL1B	-0.45117	0.839362	0.87628
DHRS2	-0.495026	0.838231	0.875986
AC022182.3	-0.686893	0.835807	0.873895
PGM5-AS1	-0.409332	0.832277	0.871085
CRLF1	-0.41872	0.831065	0.870259
RPPH1	-0.311827	0.822676	0.862348
IL1RL1	-0.508422	0.815685	0.857196
SPIB	-0.387668	0.812975	0.855218
CCNA2	-0.28189	0.806988	0.850653
TSLP	-0.363032	0.806977	0.850653
NUSAP1	-0.320008	0.805778	0.850246
HSPA2	-0.27376	0.803826	0.848957
C16orf54	-0.316174	0.801475	0.847437
CYSLTR1	-0.186914	0.797126	0.843703
PCSK1	-0.529259	0.796685	0.843703
GTSE1	-0.284096	0.793029	0.84066
ACSL1	-0.175092	0.792662	0.84066
KCNJ2	-0.306522	0.789183	0.837873
TCEAL2	-0.508495	0.788955	0.837873
HIST1H2AK	-0.651911	0.786097	0.835885
GABRD	-0.270268	0.78501	0.83516
PTPN22	-0.327969	0.784569	0.835121
LTC4S	-0.0980945	0.78449	0.835121
ISM1	-0.140268	0.783776	0.835121
INHBA	-0.0075081	0.779105	0.830589
PI16	-0.38402	0.77646	0.829054
AKAP7	-0.194058	0.774266	0.827567
PPP1R12B	-0.214005	0.772422	0.826417
LYVE1	-0.343637	0.769306	0.823544
SPINK2	-0.422312	0.768738	0.823382
GIMAP1	-0.093704	0.765027	0.820665
OSR1	-0.37598	0.76413	0.820556
DDIT4L	-0.717389	0.76257	0.819732
COL9A1	-0.676971	0.757749	0.815399
NKG7	-0.2735	0.751253	0.809723
WDR66	-0.410705	0.743459	0.803032
PCP4	-0.588302	0.742963	0.803032
FOXP3	-0.729007	0.741103	0.802505
PAPPA	-0.267373	0.740852	0.802505
CCDC69	-0.204439	0.737243	0.800004
KCNJ16	-0.324142	0.736809	0.799953
EFEMP1	-0.209456	0.736102	0.799606
CCDC144A	-0.345309	0.732822	0.796462
VMO1	-0.379445	0.728529	0.79263
OGFRL1	-0.197236	0.724367	0.788517
QRSL1	-0.310313	0.721528	0.786256
GFI1	-0.720412	0.719031	0.784363
CLSTN2	-0.460765	0.716564	0.782085
CKAP2L	-0.37234	0.711471	0.776937
TTYH1	-0.351907	0.709171	0.775463
GAD2	-0.645686	0.705806	0.772384
TMEM130	-0.480886	0.705626	0.772384
UBASH3A	-1.05387	0.705161	0.772384
MAL	-0.618016	0.704692	0.772384
C10orf128	-0.195544	0.701139	0.768907
KCNA3	-0.859254	0.699723	0.767762
GLDN	-0.655769	0.695345	0.764583
MAD2L1	-0.283473	0.694722	0.764305
CTLA4	-0.543727	0.687092	0.756313
SUGCT	-0.186219	0.685046	0.754767
PRDM1	-0.201745	0.681233	0.751066
TMIGD2	-0.544033	0.68065	0.751066
BEX2	-0.257857	0.676838	0.747982
THBS1	-0.0808516	0.675673	0.74733
WNT6	-0.895551	0.674743	0.74704
AMBP	-0.353864	0.669852	0.742482
SFRP1	-0.359336	0.669663	0.742482
PRG4	-0.844778	0.668149	0.741391
SCG3	-0.93112	0.664912	0.738196
GTSF1	-0.615326	0.664428	0.738055
CRP	-0.455129	0.663209	0.737097
CCL11	-0.249837	0.662726	0.736957
INMT	-0.131234	0.658993	0.734707
NEUROD1	-1.03757	0.657938	0.734004
ZCCHC18	-0.963882	0.65405	0.730061
PCSK2	-1.05041	0.652816	0.729078
CRISP3	-0.598273	0.646079	0.721945
DNAAF1	-0.789414	0.644396	0.720454
ADAMTS15	-1.00331	0.642718	0.719357
PIK3R6	-0.976513	0.640645	0.717814
BRSK2	-0.93444	0.636795	0.713888
CPNE5	-0.447464	0.633866	0.711376
PDGFD	-0.130247	0.631544	0.709542
CNTRL	-0.328688	0.631526	0.709542
EOMES	-1.05098	0.629907	0.708474
FAP	-0.0711474	0.629763	0.708474
GPR155	-0.350439	0.629623	0.708474
OXNAD1	-0.349544	0.629355	0.708474
WNT5A	-0.167995	0.625422	0.705479
NRG1	-0.942794	0.624521	0.705104
SAMD3	-0.600143	0.62325	0.704055
ZNF683	-0.793795	0.622642	0.703753
RGS4	-0.244937	0.619167	0.701334
ITLN1	-0.840122	0.617943	0.700358
ESM1	-0.540811	0.617602	0.700356
FGD3	-0.361345	0.613314	0.695876
SLC7A5	-0.22567	0.605581	0.688965
PTGER1	-0.630179	0.599429	0.682371
CYP26A1	-0.603417	0.595889	0.679089
ARHGAP11B	-0.484494	0.594267	0.677615
IRF4	-1.00671	0.593221	0.676797
RRM2	-0.50806	0.592979	0.676797
TSPAN32	-0.610542	0.59251	0.676733
PLA2G5	-0.774019	0.587383	0.671249
TXK	-0.806225	0.587243	0.671249
CFHR1	-1.39004	0.587097	0.671249
PCNA	-0.165065	0.584785	0.669391
LINC00861	-0.67306	0.584609	0.669391
PVRIG	-1.20143	0.583656	0.66884
MAP3K8	-0.173643	0.582978	0.668433
S100A1	-0.480411	0.579912	0.66597
CPB1	0.100239	0.573318	0.659555
FJX1	-0.283381	0.57307	0.659555
ADAMTSL2	-0.215404	0.570301	0.657183
KLRB1	-0.40642	0.569553	0.656687
ICOS	-0.773897	0.567331	0.655222
APCS	-0.484894	0.566517	0.654649
LYAR	-0.185436	0.56508	0.653354
SNX22	-0.691638	0.564939	0.653354
TBX21	-1.13451	0.564065	0.652912
PARM1	-0.299484	0.563592	0.652729
CENPM	-0.421299	0.554763	0.643226
EGR2	-0.202532	0.551996	0.640378
APOBEC3A	-1.29422	0.548974	0.63723
CCL17	-0.623824	0.548867	0.63723
SRGAP3	-0.405566	0.54732	0.636024
CCL3	-0.321597	0.540039	0.629335
RASL11B	-0.389003	0.537046	0.6262
BACH2	-0.55523	0.533526	0.622447
AC073218.2	-0.595167	0.531536	0.620476
LAG3	-0.529098	0.531018	0.620221
APOBEC3H	-0.822787	0.517696	0.605004
C21orf62	-0.490588	0.514659	0.601796
PTX3	-0.757685	0.51434	0.601764
HHEX	-0.200043	0.512429	0.599867
SNORD3B-2	-1.00841	0.511586	0.599221
CFP	-0.476116	0.50938	0.596974
BANK1	-0.65724	0.508384	0.596146
KLRC1	-0.729902	0.507651	0.59596
PTGDR	-1.2197	0.507453	0.59596
STOM	-0.0476373	0.502003	0.591013
MPZ	-0.831869	0.497497	0.586376
CXCL9	-0.535935	0.496562	0.585609
APOA4	-1.70079	0.492497	0.581479
KLRG1	-0.661461	0.491933	0.581145
JAKMIP1	-1.36261	0.489735	0.57888
HAS1	-0.516697	0.486804	0.576074
C5orf38	-0.913672	0.486093	0.575893
GINS2	-0.583778	0.484872	0.574776
TIMP4	-0.830825	0.482114	0.571835
ADRA2B	-1.27564	0.481515	0.571835
SNHG15	-0.177194	0.480883	0.571689
FABP3	-0.545192	0.477758	0.568301
CYP27A1	-0.280191	0.468326	0.557724
PIF1	-0.653229	0.458873	0.547413
ADAMTS5	-0.623376	0.458286	0.547029
CD68	-0.255511	0.45765	0.546586
PDCD1	-0.90916	0.454394	0.543641
IPCEF1	-0.51721	0.453702	0.543127
F2R	-0.162969	0.446217	0.534477
SPC25	-0.586577	0.443469	0.531494
GRP	-0.639546	0.442236	0.530323
TNFSF14	-0.920257	0.441525	0.529779
MYBL1	-0.987507	0.438728	0.526729
CD28	-0.786489	0.436194	0.524296
CCL4L2	-1.28093	0.432769	0.520482
XCL2	-0.812855	0.428773	0.515977
CBLN4	-1.36299	0.427134	0.514304
LINC00954	-1.43839	0.426528	0.513874
EBI3	-0.84885	0.426164	0.513736
LYPD1	-0.308106	0.423594	0.510935
AICDA	-2.18797	0.423266	0.510838
SCG2	-0.457801	0.420657	0.508284
ITGA1	-0.151832	0.41977	0.507509
GPR132	-0.585832	0.419544	0.507509
COCH	-1.22703	0.419418	0.507509
LTA	-1.74608	0.417523	0.50568
BFSP2	-1.93531	0.413379	0.500956
CLNK	-1.79539	0.408811	0.496001
SBSPON	-0.566892	0.406983	0.494365
PROCR	-0.20624	0.40383	0.491402
SCGB3A1	-0.297078	0.403427	0.491201
HLA-DQB2	-1.11381	0.40341	0.491201
NRGN	-0.340391	0.394129	0.480731
FIBIN	-0.229013	0.387552	0.473547
SNAI3	-0.858935	0.386447	0.472763
ENPP2	-0.211473	0.383872	0.470443
LRRN3	-1.66855	0.38292	0.469834
SUSD2	-0.327246	0.382536	0.469642
PAH	-1.12337	0.381895	0.469133
ASF1B	-0.694497	0.378292	0.46526
CNR2	-1.79823	0.377514	0.464581
NTRK3	-1.68033	0.37666	0.463806
F2RL2	-0.949851	0.376264	0.463595
PTH1R	-1.02726	0.374897	0.462187
FCRL3	-1.42971	0.374641	0.462146
OSR2	-0.388955	0.372174	0.459653
NPY1R	-0.582847	0.368445	0.45532
CD5	-0.815952	0.367932	0.454957
FLT3LG	-0.443549	0.364918	0.451501
CCL13	-1.36004	0.356491	0.441869
IRX2	-2.00173	0.351978	0.4368
PARP15	-0.837846	0.350441	0.435677
MAP4K1	-0.636039	0.349292	0.434643
SMTNL2	-2.23353	0.341086	0.424815
IL10	-1.6408	0.335093	0.418106
P2RY8	-0.543463	0.334329	0.417406
LRMP	-0.504487	0.330171	0.412714
STEAP4	-0.519871	0.330032	0.412714
FCRL2	-1.47617	0.322684	0.404089
THEMIS	-1.09926	0.32241	0.403991
TNFRSF13C	-2.22715	0.320575	0.40218
C9orf47	-1.59247	0.3176	0.39869
SLC17A4	-0.681305	0.316769	0.397888
MEDAG	-0.38245	0.316344	0.397596
TNFSF8	-1.6629	0.316181	0.397596
CD40LG	-1.00647	0.308297	0.388428
SOWAHD	-1.65122	0.303293	0.383293
LAX1	-1.43131	0.301536	0.381306
CDCA7	-0.37368	0.296059	0.374608
CRTAM	-1.6532	0.2937	0.37208
GCSAM	-1.18173	0.293229	0.371711
PSTPIP2	-0.455646	0.289786	0.367799
TYMS	-0.588117	0.289269	0.367368
SLAMF1	-0.753286	0.288038	0.36603
RGL4	-0.966005	0.287306	0.365325
CHI3L2	-0.752005	0.287023	0.365189
C1orf228	-0.723917	0.286371	0.364585
RUNX3	-0.59329	0.285452	0.363643
GGA2	-0.349646	0.285045	0.363569
C1QTNF4	-1.32017	0.284424	0.363001
ITGA8	-0.804519	0.284306	0.363001
PTGIS	-0.307345	0.283177	0.361857
FCRL1	-2.05762	0.28167	0.360154
DES	-1.84128	0.281531	0.360154
SUSD5	-1.65407	0.281406	0.360154
CERCAM	-0.175628	0.280351	0.359358
GM2A	-0.324423	0.280165	0.359342
ACAN	-2.23863	0.277722	0.356431
AURKB	-0.634206	0.274675	0.352958
ADAM19	-0.454662	0.274534	0.352958
PTPRS	-0.349153	0.271699	0.349787
ADAMTS8	-2.31602	0.270243	0.348129
CR2	-2.37761	0.269807	0.347785
CCL3L1	-1.20561	0.26886	0.346781
GPR82	-0.537044	0.264472	0.341548
SVEP1	-0.43642	0.263294	0.340239
ITK	-0.77438	0.262438	0.339345
GHRL	-0.88734	0.26107	0.338
BOC	-0.300551	0.260482	0.33745
C16orf89	-0.858324	0.260307	0.337436
MLLT11	-0.337443	0.257454	0.334366
CDK1	-0.599784	0.254879	0.331857
PDE3B	-0.824432	0.254748	0.331857
PAX5	-2.09761	0.253217	0.330318
IL2RB	-0.867549	0.250342	0.326774
FBN1	-0.134959	0.243055	0.318066
TESPA1	-1.1998	0.234437	0.307373
SFRP2	-0.228639	0.232543	0.305083
STMN2	-0.799015	0.231851	0.304369
SNAI2	-0.218812	0.229883	0.301977
IL2RA	-1.04389	0.226383	0.297758
CX3CR1	-1.72649	0.224337	0.295256
CLEC2D	-0.546531	0.222252	0.292698
SH2D2A	-0.598597	0.220069	0.290194
SNORD3D	-0.522411	0.219413	0.289698
GAS7	-0.413708	0.21823	0.28869
OSM	-0.977094	0.213795	0.283549
APOA1	-0.857708	0.210926	0.279924
ISLR	-0.164969	0.210916	0.279924
TIGIT	-0.776176	0.210523	0.279749
FAM129C	-2.01391	0.208427	0.277143
PKHD1L1	-3.03417	0.208046	0.276814
BTLA	-1.48734	0.198292	0.264859
BEX1	-0.516471	0.196423	0.262533
SLC16A6	-2.04997	0.195383	0.261481
PIK3CG	-1.25599	0.193177	0.258697
MYBL2	-0.936167	0.192519	0.257982
ANK2	-0.842961	0.191051	0.256182
AC017002.1	-0.952685	0.188217	0.252546
PTGER4	-0.452004	0.186416	0.250292
DERL3	-0.541455	0.183678	0.246936
SIGLEC1	-0.971007	0.180905	0.243685
HIST1H1B	-1.7208	0.18022	0.24292
COLEC12	-0.448907	0.18016	0.24292
MIR155HG	-0.600768	0.179509	0.242347
ANGPTL2	-0.234791	0.177075	0.239306
EAF2	-0.606218	0.176861	0.239174
CXCR6	-0.962764	0.176666	0.239174
PIM2	-0.561358	0.171734	0.233309
CLSPN	-0.90346	0.170783	0.232324
CYFIP2	-0.52436	0.170604	0.232233
CCL7	-1.64698	0.170068	0.231655
RGS13	-0.864697	0.169785	0.231422
MT1A	-0.465422	0.169751	0.231422
PRKCQ-AS1	-0.806427	0.169127	0.230983
CAMK4	-0.802397	0.168792	0.230678
ZAP70	-0.735345	0.166799	0.228105
DPEP1	-0.703406	0.166617	0.228007
TLR7	-2.42596	0.16509	0.226359
CR1	-2.0497	0.164993	0.226359
GBP5	-0.648042	0.164376	0.225803
SIRPG	-1.0996	0.161449	0.222262
ADAMDEC1	-2.41149	0.16012	0.220578
CD8B	-0.68239	0.160102	0.220578
TMEM100	-0.633237	0.155076	0.214203
DIO2	-0.409032	0.154072	0.212958
CD8A	-0.633329	0.153946	0.212926
CCR5	-1.17285	0.152845	0.211648
LAMC3	-1.91075	0.15274	0.211648
CCR2	-1.69512	0.151607	0.210255
SNORD3B-1	-0.740472	0.148673	0.206324
SLAMF7	-0.830851	0.146404	0.203722
GZMA	-0.553921	0.138663	0.193866
MUSTN1	-2.90792	0.138449	0.193697
ATP1A2	-2.38971	0.13824	0.193536
ASB2	-1.67178	0.138028	0.19337
CCL21	-0.667142	0.13748	0.192864
P2RY14	-1.84077	0.136906	0.192242
CNR1	-1.80598	0.136849	0.192242
HTRA1	-0.13539	0.134936	0.189941
ADIRF	-0.179611	0.134163	0.188982
RGS16	-0.212788	0.133867	0.188693
MEI1	-0.876386	0.132843	0.187378
GZMK	-0.578073	0.131717	0.186044
CXCR5	-2.19516	0.131578	0.185975
BCL11A	-0.864602	0.131378	0.185818
CD300E	-1.29259	0.130533	0.184751
CH25H	-0.689813	0.130319	0.184574
DPT	-0.553894	0.130111	0.184406
ITIH5	-0.306741	0.128374	0.18207
ITGAM	-0.608279	0.128313	0.18207
SPOCK2	-0.49399	0.128054	0.181865
F13A1	-0.487927	0.127761	0.181574
MYC	-0.157308	0.125558	0.178812
RNU12	-0.479015	0.12526	0.178511
FLI1	-0.286111	0.124623	0.177725
FBLN7	-0.729451	0.124334	0.177436
CES1	-0.481506	0.124214	0.177387
AKAP12	-0.127777	0.124071	0.177305
FPR2	-2.19287	0.12302	0.175925
MATK	-1.05392	0.120909	0.173266
CCL8	-1.78687	0.118357	0.169727
GPR18	-1.86479	0.117812	0.169181
TFPI2	-0.28878	0.116049	0.166764
FCRL5	-1.9442	0.115732	0.166426
APOC2	-3.09855	0.115717	0.166426
KIF20B	-0.49393	0.112931	0.162965
SCML4	-1.03099	0.112649	0.162672
CASQ2	-2.68358	0.109078	0.158067
ANTXR1	-0.128437	0.108401	0.157197
KCNAB1	-1.46741	0.107281	0.155792
PRF1	-0.732662	0.106774	0.155273
RNF152	-0.470253	0.10418	0.152037
TNFRSF13B	-1.8982	0.103318	0.151098
HPGDS	-1.06327	0.09725	0.142933
ADRA2A	-0.308486	0.0965672	0.142132
RASSF4	-0.245972	0.0965469	0.142132
KCNE1	-2.4273	0.094507	0.139398
LILRA5	-2.94928	0.0917714	0.13546
FERMT3	-0.402812	0.0905258	0.134004
ABCA6	-0.759505	0.0904711	0.134004
HSPB7	-1.43802	0.0898254	0.13335
CDH11	-0.206124	0.0893888	0.132893
SCN3A	-2.38949	0.0891166	0.132583
TRAT1	-1.04225	0.0878117	0.130831
CD1E	-1.58478	0.0874487	0.130384
GPM6B	-0.508715	0.0870096	0.129823
MEG3	-0.283284	0.0867155	0.129478
LINGO1	-2.28332	0.0856792	0.128116
FGD2	-0.690032	0.0856093	0.128104
SYTL3	-0.68038	0.0855876	0.128104
OLFML2A	-0.370227	0.0838015	0.125672
HAMP	-1.31255	0.0809746	0.121875
HRC	-2.16263	0.0789848	0.119141
RAB33A	-1.19684	0.0771609	0.11656
CDO1	-0.813776	0.0771422	0.11656
PI15	-1.2773	0.0760911	0.115112
PSTPIP1	-0.777189	0.0750116	0.113666
GRAP2	-1.0824	0.0748558	0.11366
LRRC10B	-2.95183	0.0736547	0.112054
SLIT2	-0.590958	0.0736028	0.112054
P2RY10	-1.67081	0.0735745	0.112054
PNOC	-2.16109	0.073108	0.111498
WDFY4	-1.71498	0.0723046	0.110436
TTR	-0.346148	0.0712257	0.108868
GIMAP7	-0.231027	0.0706979	0.108142
FMO1	-0.937314	0.0694792	0.106435
TOX	-1.05629	0.0679683	0.104353
S100B	-0.949851	0.0676176	0.103892
GK	-0.484885	0.0670359	0.103075
CYP1B1	-0.342589	0.0667131	0.102731
AGTR1	-1.72753	0.0656658	0.101345
NOVA1	-0.712046	0.0653333	0.100907
CXCR3	-1.12617	0.0627658	0.09716
CST2	-1.16236	0.0611912	0.0948648
BLNK	-0.502702	0.0606554	0.0941051
RETN	-0.922338	0.0592331	0.0920364
TNFRSF17	-2.25141	0.0590782	0.0918648
LINC01094	-1.6617	0.0565329	0.0881726
STAP1	-2.09966	0.055827	0.0871374
PYHIN1	-1.23511	0.0558065	0.0871374
SH2D1A	-1.15074	0.0552331	0.0863409
CTSW	-0.803874	0.0545556	0.0854759
FCER1A	-1.53507	0.0512122	0.0807277
LY9	-1.75878	0.0510683	0.0805622
ITGAL	-0.911255	0.0490365	0.0775941
IL12RB1	-1.27669	0.0489008	0.0774388
CISH	-0.777229	0.0486855	0.077157
CST7	-0.460099	0.047802	0.0759316
SYNM	-0.984622	0.0465434	0.0742178
KCNA5	-2.5159	0.0464126	0.0740665
CCL5	-0.386475	0.045669	0.0731625
NCR3	-1.71761	0.0439547	0.0705256
GZMM	-0.908489	0.042979	0.0690137
CCL4	-0.341013	0.0426457	0.0685318
REG1B	-0.1348	0.0425978	0.0685081
NR4A3	-0.633111	0.042388	0.0682238
UCHL1	-0.590023	0.0421233	0.0678507
SCN4B	-1.66549	0.0414674	0.0668985
CD96	-0.801717	0.041352	0.0667645
PAMR1	-1.2408	0.0400794	0.064862
AFF3	-1.8319	0.039918	0.0646516
APCDD1	-0.457421	0.039488	0.0640053
FABP4	-0.284616	0.0391654	0.0635322
LAMP5	-0.644539	0.0387196	0.0629575
LAMA2	-0.714657	0.038107	0.0620102
HIC1	-0.490933	0.037048	0.0604298
RASD2	-2.0191	0.0370064	0.0604097
S100A12	-1.85784	0.0358999	0.0587426
C6	-0.673514	0.0351916	0.0576751
SCN7A	-1.41807	0.0349778	0.0574159
LYL1	-0.538716	0.0338872	0.0557586
LMNB1	-0.611516	0.033786	0.0556365
TNFAIP6	-0.433421	0.0335671	0.0553201
PTCH2	-0.781008	0.0334122	0.055197
ENG	-0.147448	0.0326999	0.0541067
ADAMTS2	-0.479724	0.0322093	0.0533378
CD300LF	-1.33084	0.0321521	0.0532858
CEACAM4	-1.74398	0.0302896	0.050442
P2RY13	-2.31483	0.0300742	0.0501642
STAG3	-1.496	0.0298943	0.0499044
FOLR2	-2.00999	0.0293441	0.0490653
NGFR	-1.5929	0.0290549	0.048621
CCR6	-1.22676	0.0286226	0.0479365
PTGS1	-0.929946	0.0285262	0.0478527
CSPG4	-0.7507	0.0283062	0.0475222
SLC16A10	-1.28796	0.0271278	0.0456179
FCER2	-2.23401	0.026945	0.0453476
APOD	-0.366112	0.0267898	0.045123
ELMO1	-0.325693	0.0256241	0.0432301
TMEM107	-0.364826	0.0252452	0.0426258
LDB3	-2.53964	0.0249886	0.042227
KCNMA1	-1.03327	0.0247719	0.0418951
C3	-0.190052	0.024172	0.040914
PREX1	-0.425324	0.0238962	0.0405136
AQP9	-1.62029	0.0237406	0.040283
PDGFRL	-0.472877	0.023643	0.0401503
STAT4	-1.11144	0.023607	0.0401222
HIST1H1D	-0.78719	0.0232293	0.0395127
MZB1	-0.90258	0.0232198	0.0395127
CD6	-1.05601	0.0222212	0.037923
OTOA	-1.99772	0.0213217	0.0364482
SEMA5A	-0.516882	0.0208405	0.0357143
S100A8	-0.398761	0.02046	0.0351175
LSAMP	-0.76564	0.0202912	0.0348596
SSTR2	-3.06691	0.020103	0.0345651
MOXD1	-0.637229	0.0200331	0.0344736
CD247	-0.838964	0.0198514	0.0341894
NEGR1	-0.914305	0.0194867	0.0335894
SCRG1	-0.796122	0.0194217	0.0335052
IGFBP6	-0.253893	0.0191295	0.0330564
NR2F1	-0.530715	0.0187713	0.0324645
MATN3	-0.642014	0.0181277	0.0314042
RUNX1T1	-0.406179	0.017201	0.0298738
MARCO	-1.1348	0.0170465	0.0296305
PPM1K	-0.439806	0.0165931	0.028891
HIST1H1E	-0.778266	0.0163458	0.0284845
COL5A3	-0.934782	0.0162051	0.0282632
MRC1	-2.98509	0.0158531	0.027696
ARHGAP24	-0.493955	0.0154333	0.0270311
NRIP2	-2.26735	0.0151689	0.0266132
CADM1	-0.386539	0.0150578	0.0264408
RBPMS2	-1.62687	0.0144055	0.0253818
ZCCHC24	-0.462969	0.0140288	0.0247391
FMO3	-1.57533	0.0140014	0.0247162
CCL26	-1.40751	0.0137827	0.0244093
NGF	-2.14975	0.0137734	0.0244093
RFTN1	-0.391418	0.0136626	0.0242382
FMOD	-0.459137	0.013095	0.0232913
P2RX5	-1.39717	0.0127351	0.0226706
CTSK	-0.281629	0.0125977	0.0224454
GPR20	-3.57396	0.0125027	0.0222954
AIM2	-1.61376	0.0121931	0.0217809
WDR74	-0.202132	0.0119444	0.0213736
ASGR1	-1.11837	0.0118507	0.0212612
REM1	-2.01114	0.0113857	0.0204804
TLR10	-2.60622	0.0113631	0.0204575
FN1	-0.0275295	0.00992266	0.0179111
HMOX1	-0.592684	0.00986237	0.0178178
APOBR	-1.3338	0.00984042	0.0177938
CCR10	-1.38872	0.00968385	0.0175568
IL4I1	-0.944711	0.00940043	0.0170729
C2	-0.636113	0.00932781	0.0169709
TMEM119	-0.664485	0.00923527	0.0168173
ORAI2	-0.465919	0.00901435	0.0164295
TREM1	-0.893487	0.00883803	0.0161224
FBLN5	-0.417149	0.00882255	0.0161084
NLRP3	-1.75612	0.00862889	0.0157827
ARHGAP25	-0.937241	0.00828713	0.015198
TBXAS1	-0.642963	0.0077794	0.014305
DENND1C	-1.41702	0.00777785	0.014305
HTRA3	-0.475084	0.00766619	0.0141219
FOXF1	-0.665319	0.00737297	0.0136068
OR51E1	-2.88176	0.00732576	0.0135431
PDK4	-0.289931	0.00728826	0.0134859
DUSP2	-0.623784	0.00678456	0.0126104
HSD11B1	-1.20951	0.00623226	0.0116362
PODN	-0.629903	0.00621404	0.0116127
COL5A2	-0.200492	0.00595017	0.0111498
KLHL23	-0.585944	0.00589286	0.0110525
GPC3	-0.942286	0.00569085	0.0107125
CCDC3	-0.479701	0.00552829	0.010416
BCL2	-0.938435	0.00551071	0.0103923
GADD45B	-0.15742	0.00538878	0.0101717
TLR2	-0.801935	0.00528554	0.0100043
S1PR4	-1.00636	0.00523486	0.00991742
CFD	-0.444606	0.00521944	0.00989729
MCM5	-0.647645	0.00511604	0.00971907
CCL19	-0.699537	0.00490683	0.0093302
LGI4	-1.12781	0.0047273	0.00901114
FILIP1	-0.411914	0.00437794	0.00836304
OSCAR	-1.28248	0.00433551	0.00828966
SGIP1	-0.583667	0.00422266	0.00808137
LPL	-1.43015	0.00420873	0.00806967
LUM	-0.295309	0.00406731	0.00782029
FCGR1B	-2.87441	0.00378896	0.00729869
APOBEC3G	-0.61649	0.00353591	0.0068176
DEF6	-0.67017	0.00343552	0.00663024
ATP1B2	-2.75145	0.00341919	0.00660489
TRPC6	-2.05264	0.00333836	0.0064548
CCL2	-0.261196	0.0033183	0.00642201
RNASE2	-2.28773	0.00328142	0.00636256
IGF1	-0.834086	0.00321713	0.00624377
SNCA	-1.07987	0.00319502	0.0062067
AOAH	-1.33856	0.00307167	0.00597269
INPP5D	-0.811152	0.00298522	0.00581006
RBP1	-0.203732	0.00295546	0.00575756
CITED2	-0.311083	0.00291024	0.00568556
FMO2	-1.40538	0.00290283	0.00567646
CSF2RA	-0.854379	0.00283028	0.00553984
EBF2	-1.77887	0.00277277	0.00544274
THEMIS2	-0.626928	0.00277186	0.00544274
OMD	-0.79349	0.00277022	0.00544274
TDO2	-1.93331	0.00271306	0.00534078
HAND2-AS1	-1.15075	0.00267533	0.00527152
SNX20	-1.3609	0.00264366	0.00521908
APOLD1	-0.281754	0.00254649	0.00503205
AKNA	-0.617101	0.00252309	0.00499059
NID2	-0.74489	0.00252266	0.00499059
PCDH9	-1.14355	0.0025164	0.00498692
CD7	-0.641953	0.00239078	0.00474253
ITGAX	-1.08892	0.00234367	0.00465801
FGR	-0.708672	0.00233883	0.00465287
WFDC1	-1.46081	0.00233317	0.00464609
COL6A3	-0.233479	0.00227679	0.00454258
FILIP1L	-0.315866	0.00204096	0.00409184
SERPINI1	-0.889173	0.00196955	0.0039525
ITGB7	-1.22969	0.00181776	0.003655
CLEC4E	-1.57628	0.00172869	0.00347928
MMP19	-0.680443	0.00169042	0.00340557
RERGL	-1.90212	0.00163572	0.00330829
SNX10	-0.520952	0.00159986	0.00324211
TMEM156	-1.23762	0.00153729	0.00312452
SLCO2B1	-0.823988	0.00150368	0.0030592
COL6A1	-0.186279	0.00143171	0.00291855
FXYD2	-0.367261	0.00141957	0.00289665
ADH1B	-1.44476	0.00139609	0.00285157
CD1D	-1.43853	0.00134992	0.00276271
GPR4	-0.723382	0.0013087	0.00268903
CXorf21	-2.37219	0.00130528	0.00268467
PLCE1	-0.823606	0.00129882	0.00267405
HEY2	-1.73068	0.00120563	0.00249712
HOXB-AS1	-0.690415	0.0011606	0.00240626
GPBAR1	-1.39637	0.00105442	0.00219273
F10	-1.19758	0.00102685	0.00213971
ANGPTL1	-1.34525	0.000995787	0.00207707
CHST2	-1.48174	0.000980766	0.00204781
GPR171	-1.28867	0.000976839	0.00204167
CD3G	-1.07209	0.000923886	0.00193688
FAM129A	-0.605714	0.000923869	0.00193688
CCR7	-1.21024	0.000897072	0.00188449
RGS19	-0.589449	0.00087243	0.00183459
OGN	-1.08851	0.000864847	0.0018205
HIST1H4C	-0.267252	0.000789109	0.00166958
LILRB2	-2.23807	0.000786368	0.00166549
KCTD12	-0.287455	0.00076117	0.00161876
GNG7	-0.664837	0.000743377	0.00158255
FXYD1	-0.552436	0.000743099	0.00158255
HRH2	-2.35795	0.000707617	0.00150953
RASAL3	-1.01794	0.00070031	0.00149549
SP140	-1.30779	0.000626981	0.00134167
AOC3	-0.4962	0.000614485	0.00131766
TNFRSF1B	-0.481086	0.000588588	0.00126476
KLHL6	-1.4093	0.000568994	0.00122393
TBX3	-1.10394	0.000561564	0.00120921
BLK	-2.26654	0.000547029	0.00118037
CD1C	-1.99295	0.000540105	0.00116665
FBLN1	-0.446083	0.000532428	0.00115127
GPAT2	-1.17116	0.000509217	0.00110339
FAM13C	-0.604001	0.000495471	0.00107474
GIMAP4	-0.338441	0.00049375	0.00107213
SFRP4	-0.677311	0.000452498	0.000983587
PDE4B	-1.02017	0.000437876	0.000953811
SESN1	-0.731496	0.000417143	0.000910572
EPHA3	-1.62092	0.000410126	0.00089715
CLEC5A	-1.34586	0.000349509	0.000768622
LILRB1	-3.14269	0.000314164	0.000693849
ELN	-0.545438	0.000299479	0.000662833
CD22	-2.02198	0.000287646	0.000637327
SOCS1	-0.664657	0.000280459	0.00062274
RGS18	-2.5844	0.000279852	0.00062206
SDS	-2.22624	0.000255383	0.00056951
CD72	-1.63073	0.000248285	0.000554281
PRSS1	-0.149735	0.000238086	0.000532662
SLC31A2	-0.788436	0.000234404	0.000524993
COL1A1	-0.22737	0.000230861	0.00051762
AGT	-0.883591	0.000204626	0.000459298
NPL	-1.4097	0.000202953	0.000456038
POU2AF1	-1.5565	0.000202869	0.000456038
ACTG2	-1.24627	0.000199291	0.000449276
CD180	-2.56496	0.000195261	0.000440672
CLEC4A	-1.34704	0.000187099	0.000422712
LIPA	-0.364222	0.000184243	0.000416716
HAND2	-1.10353	0.00018263	0.000413521
KCNK17	-1.98312	0.000172481	0.0003914
RBMS3	-0.507028	0.000172394	0.0003914
MSRB3	-0.451358	0.000164471	0.000375699
LCK	-0.844846	0.000161066	0.000368737
SLAMF8	-1.93772	0.000146652	0.00033761
CTSL	-0.211423	0.000145903	0.00033626
CLEC12A	-1.68958	0.000144538	0.000333715
SUSD3	-1.21363	0.000140336	0.000324518
IGLL5	-0.298573	0.0001351	0.000313815
HLA-DOA	-1.0825	0.000131298	0.00030567
FGF7	-0.68255	0.000130642	0.000304487
DCK	-0.553814	0.000125935	0.000293847
RASL12	-1.97538	0.000118815	0.000277549
TIMP3	-0.231733	0.00010549	0.0002467
FCN1	-1.63372	9.92426e-05	0.000232617
PHACTR1	-1.32792	9.49912e-05	0.000222905
THBS4	-1.16022	8.68208e-05	0.00020443
HLA-DOB	-1.60287	8.49547e-05	0.000200264
GNG2	-0.885898	7.72325e-05	0.000182896
ARHGEF17	-0.80471	7.48812e-05	0.000177531
ABCA8	-1.58125	7.36958e-05	0.000174922
C2orf40	-1.29371	7.17762e-05	0.000170758
SLC2A3	-0.246938	6.94877e-05	0.000165695
CLEC10A	-2.05075	6.4898e-05	0.000155109
CD36	-0.620872	6.42254e-05	0.000153679
PTGER3	-1.37108	6.40089e-05	0.000153339
MPEG1	-1.80199	6.30232e-05	0.000151153
MOCS1	-1.46316	6.16825e-05	0.00014811
PLA2G7	-2.53824	6.12488e-05	0.000147239
GNG11	-0.198424	5.51144e-05	0.000133268
VCAN	-0.344538	5.48449e-05	0.000132772
ITGA4	-1.47957	5.27316e-05	0.000128107
CD83	-1.06529	5.20747e-05	0.000126809
LRRC25	-2.50962	4.82187e-05	0.000117558
SLC8A1	-1.2599	4.17368e-05	0.000102117
SSPN	-0.564797	4.09494e-05	0.000100428
FCRLA	-2.3696	3.6161e-05	8.879e-05
CD38	-1.88797	3.57742e-05	8.7945e-05
CCR1	-1.98573	3.38125e-05	8.34202e-05
SIGLEC10	-1.98223	2.82019e-05	6.99963e-05
RASD1	-0.831481	2.7315e-05	6.79584e-05
GPR65	-1.32608	2.54357e-05	6.35893e-05
TAGAP	-1.42386	2.25943e-05	5.66915e-05
ITGA7	-1.26975	2.16172e-05	5.43721e-05
PHLDA1	-0.356655	2.15421e-05	5.42492e-05
ARHGAP9	-1.22917	1.94123e-05	4.91256e-05
LZTS1	-1.57342	1.90114e-05	4.817e-05
SGCA	-1.9635	1.80277e-05	4.57337e-05
PLD4	-2.07774	1.77568e-05	4.51019e-05
NCF2	-0.899147	1.52147e-05	3.88361e-05
ANGPT1	-1.82136	1.44797e-05	3.70055e-05
SPN	-1.42516	1.31543e-05	3.37017e-05
C5AR1	-1.55478	1.16841e-05	3.00469e-05
PPY	-0.522872	8.98444e-06	2.31911e-05
CSF3R	-1.56128	7.07092e-06	1.83666e-05
GGT5	-0.518458	5.12301e-06	1.33573e-05
DDR2	-0.632703	5.10975e-06	1.33396e-05
TCL1A	-1.8303	4.9624e-06	1.29878e-05
IL7R	-0.810331	4.94209e-06	1.2951e-05
CD19	-2.19231	4.78022e-06	1.25428e-05
NID1	-0.5852	4.69764e-06	1.23575e-05
FAM105A	-0.969797	4.38509e-06	1.155e-05
CLECL1	-2.29922	3.53538e-06	9.3597e-06
MXRA8	-0.492596	3.51145e-06	9.32023e-06
MRGPRF	-1.62303	3.38425e-06	8.99417e-06
TMEM38B	-0.847106	3.27461e-06	8.72299e-06
MIR145	-1.64932	3.27117e-06	8.72299e-06
EIF1AY	-0.715294	3.22593e-06	8.61779e-06
CNN1	-1.22653	2.90264e-06	7.76419e-06
GPR34	-1.9966	2.55302e-06	6.85564e-06
FPR3	-1.879	2.51361e-06	6.7586e-06
HVCN1	-1.24124	2.35295e-06	6.35973e-06
RCAN2	-0.814686	2.15307e-06	5.83477e-06
CD248	-0.785158	1.86962e-06	5.10009e-06
TMEM204	-0.427847	1.75853e-06	4.8034e-06
SLC1A3	-1.47561	1.51801e-06	4.16295e-06
TGFB3	-1.01358	1.21146e-06	3.34894e-06
DOCK2	-1.43523	1.15334e-06	3.19685e-06
C1QTNF2	-2.14335	1.11252e-06	3.092e-06
ENTPD1	-0.432386	1.0444e-06	2.91445e-06
ANKRD44	-1.04801	9.31236e-07	2.60923e-06
SCIMP	-1.97781	7.32869e-07	2.06745e-06
GAPT	-2.35737	7.29437e-07	2.06058e-06
PRRX1	-0.616916	7.19526e-07	2.03537e-06
MYO1G	-1.47523	7.07468e-07	2.00676e-06
IL16	-1.28596	7.07262e-07	2.00676e-06
DOK2	-1.4718	6.39843e-07	1.81994e-06
FHL5	-3.08569	6.2579e-07	1.78242e-06
AEBP1	-0.347323	6.121e-07	1.74584e-06
NFASC	-1.89347	6.10309e-07	1.74314e-06
IL10RA	-1.29009	6.10113e-07	1.74314e-06
SLC38A11	-1.74184	5.83381e-07	1.67085e-06
SLC7A2	-1.27343	5.54015e-07	1.58895e-06
TNFSF13B	-0.762286	5.17821e-07	1.48928e-06
PLN	-1.32434	5.11657e-07	1.4736e-06
PLTP	-0.646398	4.59644e-07	1.3275e-06
SIT1	-1.56904	4.34669e-07	1.25713e-06
C1QTNF1	-0.715755	4.22559e-07	1.22554e-06
ABCC9	-1.72243	4.07418e-07	1.18329e-06
GEM	-0.660473	3.83139e-07	1.11434e-06
ARHGAP30	-1.17446	3.77896e-07	1.10064e-06
MAP3K7CL	-1.14296	3.34794e-07	9.76483e-07
PAG1	-0.744945	2.95372e-07	8.6272e-07
SASH3	-1.48696	2.89807e-07	8.47665e-07
SELL	-1.17509	2.81609e-07	8.26027e-07
PILRA	-2.1051	2.49048e-07	7.31555e-07
PLIN2	-0.479028	2.42383e-07	7.12992e-07
HLA-DQA2	-1.02619	2.2699e-07	6.68666e-07
SRPX	-0.81258	1.79717e-07	5.31683e-07
CYTH4	-1.57529	1.37109e-07	4.06796e-07
PTN	-0.874843	1.28292e-07	3.81185e-07
CD300A	-1.7361	1.18827e-07	3.5357e-07
GJC1	-1.39937	1.08318e-07	3.23233e-07
HERPUD1	-0.14569	1.06156e-07	3.17238e-07
CDH6	-1.22017	8.54163e-08	2.56001e-07
C1QB	-0.961803	8.53484e-08	2.56001e-07
BTK	-2.16319	7.98834e-08	2.41168e-07
EGFL6	-2.24089	7.71709e-08	2.33321e-07
EDNRA	-0.887894	7.53851e-08	2.28256e-07
RERG	-0.749203	7.46176e-08	2.26263e-07
SLC11A1	-0.869906	6.88183e-08	2.09602e-07
RGS2	-0.539795	5.59399e-08	1.71135e-07
CD3D	-0.744751	5.28892e-08	1.62283e-07
S1PR3	-1.68426	4.68986e-08	1.44115e-07
CD69	-0.925663	4.17194e-08	1.28583e-07
PDLIM3	-0.529244	3.79641e-08	1.17184e-07
CREM	-0.481905	3.75915e-08	1.16207e-07
EFHD1	-1.64113	3.17956e-08	9.91812e-08
LAT2	-1.25858	2.78977e-08	8.72861e-08
LPXN	-0.98876	2.44582e-08	7.703e-08
CPM	-0.604823	2.22503e-08	7.03628e-08
MRVI1	-1.54832	2.01856e-08	6.42269e-08
EDNRB	-1.10918	1.66792e-08	5.32759e-08
EMILIN1	-0.622485	1.59591e-08	5.10937e-08
POU2F2	-1.56797	1.33607e-08	4.30419e-08
CYGB	-0.846343	1.24008e-08	4.00746e-08
ANGPT2	-1.34409	1.12327e-08	3.63566e-08
CD2	-1.05623	9.21657e-09	2.9972e-08
MSR1	-1.60928	7.94588e-09	2.59624e-08
CD3E	-1.15087	7.15141e-09	2.3478e-08
ACP5	-0.880575	6.75321e-09	2.2277e-08
NCF4	-1.3144	5.97817e-09	1.97519e-08
ECM2	-1.1734	4.77134e-09	1.58151e-08
TGFBI	-0.445054	4.28449e-09	1.42242e-08
ADAMTS4	-0.747721	4.02093e-09	1.33923e-08
HCK	-1.7228	3.53466e-09	1.18108e-08
GUCY1A2	-1.7415	3.29217e-09	1.10184e-08
BIN2	-1.45835	2.84094e-09	9.53908e-09
TBC1D10C	-1.12178	2.56165e-09	8.62937e-09
MAFB	-0.823174	2.48762e-09	8.39369e-09
COLEC11	-1.643	2.38139e-09	8.04841e-09
OLR1	-1.79305	2.20313e-09	7.45813e-09
PRKCB	-1.93518	1.89078e-09	6.44301e-09
PRR16	-1.79829	1.46661e-09	5.03081e-09
LILRB4	-2.12231	1.39058e-09	4.77794e-09
C7	-0.927979	9.85232e-10	3.40788e-09
CHN1	-0.985584	8.93853e-10	3.09699e-09
CCDC80	-0.650154	8.0221e-10	2.78414e-09
CRYAB	-0.683149	7.95036e-10	2.76389e-09
C1QC	-1.44278	7.79187e-10	2.71336e-09
PTPN7	-1.46495	7.58001e-10	2.64404e-09
TCF21	-1.49056	6.10911e-10	2.13457e-09
BCL2A1	-1.34369	5.09897e-10	1.78464e-09
MFGE8	-0.531806	2.16667e-10	7.66127e-10
FMNL1	-1.04998	1.25105e-10	4.46185e-10
IKZF1	-1.54716	1.23289e-10	4.40471e-10
C1QA	-0.980543	9.8083e-11	3.5286e-10
SPP1	-0.394127	8.38366e-11	3.02662e-10
SLIT3	-1.35987	7.95962e-11	2.88362e-10
C3AR1	-1.92736	6.23834e-11	2.26799e-10
TBX2	-1.64631	4.61305e-11	1.68601e-10
LMOD1	-1.62908	4.03127e-11	1.47861e-10
VPREB3	-2.03349	3.34659e-11	1.23626e-10
FAM162B	-2.80893	2.1748e-11	8.09181e-11
NCKAP1L	-1.96775	2.16132e-11	8.05619e-11
NUPR1	-0.332905	2.15606e-11	8.05112e-11
FCGR3A	-1.41169	1.76699e-11	6.61021e-11
CPVL	-1.41226	1.62645e-11	6.10657e-11
FGL2	-1.14455	1.19853e-11	4.53291e-11
FCGR1A	-2.56391	1.1591e-11	4.40801e-11
CD27	-1.51502	9.50291e-12	3.62057e-11
PTP4A3	-0.725901	8.27713e-12	3.17111e-11
FCGR2B	-1.5959	6.09422e-12	2.3435e-11
PLEK	-2.02888	4.33866e-12	1.67152e-11
TUBA1A	-0.362366	4.30426e-12	1.66136e-11
PTGIR	-1.6884	4.11901e-12	1.59284e-11
FOXS1	-1.94895	3.94399e-12	1.53089e-11
ENPEP	-2.1286	3.7624e-12	1.46315e-11
CTRB2	-0.347902	3.26728e-12	1.27541e-11
MYH11	-1.68405	3.20352e-12	1.25289e-11
OLFML2B	-1.24832	2.87593e-12	1.12691e-11
KCNJ8	-1.82395	2.83845e-12	1.11433e-11
OLFML3	-0.931367	2.72479e-12	1.07175e-11
TRAF3IP3	-1.36488	2.34331e-12	9.25225e-12
CD14	-1.0379	1.24111e-12	4.92862e-12
MCAM	-0.80829	1.07443e-12	4.28319e-12
FPR1	-2.23012	7.18933e-13	2.87712e-12
TREM2	-1.81693	6.76464e-13	2.7177e-12
ACAP1	-1.06726	5.05741e-13	2.03707e-12
ZNF331	-1.17445	4.65898e-13	1.88274e-12
ARRB2	-0.95786	3.82005e-13	1.54978e-12
PARVG	-1.48963	3.71127e-13	1.50862e-12
CSF1R	-1.6467	3.52595e-13	1.43611e-12
NTRK2	-1.46596	1.78747e-13	7.30915e-13
PRELP	-1.1099	1.67963e-13	6.8818e-13
ADCY3	-1.28344	1.59191e-13	6.54841e-13
KCNMB1	-1.81709	1.51205e-13	6.2323e-13
LCP2	-1.2503	1.15094e-13	4.76291e-13
ADAMTS1	-0.67173	1.10438e-13	4.5794e-13
FHL1	-0.902973	1.03808e-13	4.31316e-13
IRF8	-1.38039	6.24371e-14	2.60997e-13
RASGRP2	-1.47066	5.88667e-14	2.47576e-13
MFAP4	-1.02286	4.01924e-14	1.70076e-13
CD79B	-1.24288	3.64991e-14	1.54765e-13
GJA4	-1.07556	2.64166e-14	1.12475e-13
LTB	-0.859915	2.47406e-14	1.05775e-13
ID4	-1.4664	2.43811e-14	1.04454e-13
CD163	-1.51199	2.37751e-14	1.0207e-13
EBF1	-0.996158	2.34701e-14	1.0097e-13
ADAP2	-2.26584	1.77127e-14	7.63605e-14
PLXDC1	-1.48136	1.5347e-14	6.63004e-14
CLEC7A	-1.57428	1.28397e-14	5.55847e-14
C11orf96	-0.69375	1.18469e-14	5.13948e-14
VSIG4	-2.0722	1.05773e-14	4.59835e-14
CCDC102B	-2.09963	1.04054e-14	4.54273e-14
HIGD1B	-1.64306	9.42918e-15	4.12527e-14
BASP1	-0.984874	8.34994e-15	3.66864e-14
LAIR1	-1.60355	7.71181e-15	3.3955e-14
CD84	-1.87576	6.88422e-15	3.04409e-14
APOC1	-0.615803	5.6835e-15	2.5294e-14
MS4A4A	-2.11207	4.38797e-15	1.96554e-14
APBB1IP	-1.60858	2.37856e-15	1.07243e-14
HAVCR2	-1.91184	1.17452e-15	5.34227e-15
COL4A1	-0.565683	7.34591e-16	3.35604e-15
IFI30	-2.17995	6.43369e-16	2.95235e-15
MYO1F	-1.2064	5.68687e-16	2.61545e-15
MS4A1	-1.93096	5.4965e-16	2.53354e-15
COL4A2	-0.552172	4.66335e-16	2.15432e-15
PGF	-1.342	3.98979e-16	1.85144e-15
DCN	-0.629043	2.60193e-16	1.21561e-15
COX4I2	-1.76674	2.30368e-16	1.08116e-15
HEYL	-1.79826	1.22864e-16	5.81912e-16
AP1S2	-0.686229	8.45847e-17	4.03389e-16
NEXN	-1.06519	5.27476e-17	2.53902e-16
NDUFA4L2	-0.949527	4.8929e-17	2.36071e-16
HSPB6	-1.7142	3.37126e-17	1.63804e-16
NCF1	-1.24827	3.19651e-17	1.55679e-16
CD86	-2.33351	2.78674e-17	1.36365e-16
NOTCH3	-0.919037	1.15457e-17	5.71746e-17
TPM2	-0.504267	6.01727e-18	3.00137e-17
PCOLCE	-0.695163	4.80174e-18	2.40087e-17
CD302	-1.1385	3.35305e-18	1.68059e-17
PMP22	-0.612899	1.87676e-18	9.42945e-18
DOCK8	-1.39533	1.85542e-18	9.345e-18
CD79A	-1.88159	1.60973e-18	8.1673e-18
KCNE4	-1.62602	9.01325e-19	4.59564e-18
COL1A2	-0.543239	5.45862e-19	2.79703e-18
ASPN	-0.954019	4.23679e-19	2.17636e-18
IGSF6	-3.19085	3.02933e-19	1.55999e-18
THY1	-0.799473	2.80714e-19	1.45282e-18
COL6A2	-0.562152	2.60733e-19	1.3528e-18
MYLK	-0.970429	2.31008e-19	1.20159e-18
RHOH	-1.67515	1.78955e-19	9.33189e-19
AXL	-0.969612	8.73492e-20	4.56648e-19
CYBB	-1.94723	4.19681e-20	2.21647e-19
NDN	-0.994842	3.99476e-20	2.11517e-19
COL3A1	-0.542598	2.43619e-20	1.29325e-19
HOPX	-0.908653	1.16587e-20	6.25329e-20
MARCH1	-2.38291	8.36947e-21	4.51252e-20
RGS5	-1.12843	1.763e-21	9.5805e-21
CLEC11A	-0.833149	1.028e-21	5.64577e-21
SYNPO2	-2.01209	3.14194e-22	1.74411e-21
DKK3	-1.12359	2.6697e-22	1.48998e-21
WAS	-1.75445	8.80396e-23	4.95373e-22
SLA	-1.52232	8.61032e-23	4.85801e-22
ID3	-0.580893	3.45939e-23	1.98987e-22
SPARC	-0.494284	1.23616e-23	7.19061e-23
CD4	-1.96372	7.03323e-24	4.1615e-23
SAMSN1	-1.4895	3.12302e-24	1.86388e-23
MS4A7	-2.10877	2.8141e-24	1.68438e-23
CSRP2	-1.18011	2.60055e-24	1.56109e-23
MS4A6A	-1.74357	2.15982e-24	1.3003e-23
C1S	-0.689312	1.1782e-24	7.13482e-24
UCP2	-1.05149	8.71858e-25	5.31087e-24
COL18A1	-0.592763	4.71484e-25	2.88906e-24
EVI2A	-1.53252	1.51942e-25	9.39402e-25
FCGR2A	-1.89535	5.4837e-26	3.4211e-25
IGFBP5	-0.94687	4.2978e-26	2.68938e-25
GPX3	-1.08382	2.51587e-26	1.58877e-25
MNDA	-2.36073	1.65134e-26	1.04923e-25
RGS1	-0.829983	7.61032e-27	4.86542e-26
CTSC	-0.424398	7.54719e-27	4.84005e-26
GPSM3	-0.980355	4.03931e-27	2.60662e-26
RNASE6	-1.71215	6.54046e-28	4.28764e-27
TYROBP	-1.03255	4.56378e-28	3.00134e-27
[truncated: 66 more rows]

## Sheet: 5.DEGAS Differential Genes
Gene	logfoldchanges	pvals	pvals_adj
SOD3	3.60949	0	0
CALD1	2.58822	0	0
MYL9	2.55308	0	0
TAGLN	2.58148	0	0
C1S	2.31064	0	0
ACTA2	2.48483	0	0
C1R	2.26871	0	0
PDGFRB	3.09065	0	0
BGN	2.45356	0	0
COL18A1	2.02127	0	0
TPM2	2.07934	0	0
CPE	2.24823	0	0
NOTCH3	2.76855	0	0
COL6A2	2.0192	0	0
MAP1B	2.59102	0	0
MFGE8	2.17065	0	0
CRISPLD2	2.65036	0	0
COL3A1	1.97331	0	0
SDC2	2.15462	0	0
LGALS1	1.3814	0	0
COL1A2	1.96301	0	0
PLAC9	2.41108	0	0
MGP	1.62401	0	0
PCOLCE	2.04313	0	0
SERPINF1	1.99209	0	0
FRZB	2.82289	0	0
PPP1R14A	2.44178	0	0
MT1E	1.42118	0	0
COL14A1	2.97447	0	0
IGFBP5	2.14404	0	0
NDUFA4L2	2.46712	0	0
PHLDA1	1.72604	0	0
RGS5	2.50187	0	0
COL6A1	1.57777	0	0
FILIP1L	1.92445	0	0
GPX3	2.16103	0	0
NUPR1	1.3739	0	0
CSRP2	2.37797	0	0
MYLK	2.26102	0	0
SPARC	1.41876	0	0
NEXN	2.48863	0	0
CRYAB	2.38218	0	0
ADIRF	1.66988	0	0
RBP1	1.68138	0	0
DCN	1.6476	0	0
COL1A1	1.58591	0	0
C11orf96	1.89783	0	0
SMOC2	2.53006	0	0
SEPT4	2.5301	0	0
ASPN	2.01453	0	0
THY1	1.73275	6.48362e-304	1.96892e-302
DKK3	2.0049	3.32054e-285	9.65763e-284
COL4A2	1.38214	1.92988e-284	5.53499e-283
AEBP1	1.47793	7.50337e-284	2.12253e-282
TPPP3	1.69607	2.63342e-279	7.25068e-278
PDLIM3	1.86636	1.78755e-278	4.85697e-277
SYNPO2	2.97941	2.53591e-257	6.30923e-256
NTRK2	3.11257	9.8702e-255	2.37e-253
COX4I2	3.0704	2.39899e-253	5.69416e-252
C1QTNF1	2.23569	8.09589e-253	1.89977e-251
ID4	2.88117	6.55827e-251	1.52167e-249
ADAMTS1	1.68972	4.81249e-250	1.1042e-248
NDN	1.86974	1.17947e-249	2.67648e-248
KCNE4	2.68637	8.36897e-246	1.87847e-244
HIGD1B	2.9751	5.51972e-236	1.17508e-234
MT1M	1.41391	3.15956e-232	6.59039e-231
RERG	2.27381	1.58112e-230	3.26502e-229
HEYL	2.93787	2.51791e-229	5.14801e-228
COL4A1	1.27736	2.53674e-227	5.03689e-226
COL5A2	1.46171	2.24083e-223	4.36539e-222
FXYD1	1.96615	7.18436e-215	1.32462e-213
CCDC80	1.57974	9.36672e-212	1.69669e-210
COL6A3	1.45364	8.47366e-210	1.50846e-208
PGF	2.35904	3.19017e-206	5.63051e-205
CAV1	1.07973	1.83978e-203	3.19256e-202
PALLD	1.21154	1.294e-199	2.22677e-198
GJA4	2.0775	7.16584e-199	1.22293e-197
RARRES2	1.02567	1.2624e-197	2.13676e-196
MTHFD2	1.23609	2.92036e-194	4.86334e-193
ARID5B	1.00506	2.31777e-193	3.82895e-192
CLEC11A	1.34613	4.72655e-192	7.74629e-191
FN1	1.11749	8.8338e-192	1.43636e-190
NNMT	0.941272	2.18166e-189	3.46549e-188
FSTL1	1.0867	2.70327e-185	4.10459e-184
MCAM	1.68483	2.18849e-184	3.2987e-183
EMILIN1	1.71701	3.95664e-178	5.83604e-177
FHL1	1.72074	1.3728e-177	2.01052e-176
HSPB6	2.51112	2.19579e-177	3.19317e-176
SLIT3	2.62912	5.58639e-177	8.06706e-176
TIMP3	1.03533	2.00577e-175	2.87632e-174
AKAP12	1.34115	1.04262e-173	1.48484e-172
TUBA1A	0.92396	6.06124e-170	8.28905e-169
GEM	1.73167	3.85092e-169	5.23167e-168
ITM2C	1.01379	1.37087e-168	1.85022e-167
PTP4A3	1.4963	3.17256e-167	4.25412e-166
CCDC102B	2.97873	2.30442e-165	3.0504e-164
IGFBP6	1.19161	2.14347e-162	2.74923e-161
PTGIR	2.80754	1.0275e-161	1.30172e-160
TBX2	2.90982	1.55271e-161	1.95509e-160
MXRA8	1.37217	3.93728e-161	4.92756e-160
MYH11	2.85629	2.1556e-160	2.68151e-159
CLU	1.12009	5.65685e-159	6.95322e-158
APOE	0.906489	1.9011e-158	2.32295e-157
RASD1	2.14772	1.82763e-157	2.20705e-156
PLXDC1	2.28181	2.54743e-157	3.05839e-156
MFAP4	1.7276	4.44013e-157	5.29992e-156
LMOD1	2.91364	2.26093e-153	2.57946e-152
HOPX	1.27653	1.89662e-151	2.15193e-150
ENPEP	3.22268	6.11255e-151	6.8975e-150
ID3	0.952109	1.05187e-149	1.17411e-148
ADAMTS4	1.62871	1.72246e-147	1.90207e-146
GUCY1A2	3.34422	9.62648e-145	1.05738e-143
ADCY3	2.00319	1.76973e-141	1.90338e-140
EFHD1	3.14434	1.95017e-141	2.08658e-140
AXL	1.36729	5.5629e-141	5.92134e-140
PRRX1	1.72399	3.91441e-140	4.14526e-139
EBF1	1.60643	1.85021e-138	1.94933e-137
KCNJ8	2.75244	3.02951e-138	3.17561e-137
PRELP	1.65334	3.0611e-132	3.12929e-131
GGT5	1.32756	2.16155e-131	2.17737e-130
PLN	2.73599	1.35027e-130	1.34701e-129
FAM162B	3.68878	8.2403e-129	8.06456e-128
FXYD2	1.53056	2.34605e-127	2.27446e-126
CHN1	1.83478	3.18471e-126	3.07309e-125
THBS1	1.06554	1.55264e-125	1.49126e-124
CD248	1.96879	1.87855e-125	1.79592e-124
EDNRA	1.98579	3.44789e-125	3.28106e-124
PTN	1.75836	6.48137e-125	6.13947e-124
SRPX	1.75183	7.61703e-124	7.08521e-123
CDH6	2.47105	8.11883e-124	7.51811e-123
DDR2	1.66588	1.90776e-123	1.75872e-122
NID1	1.44048	1.70083e-120	1.52705e-119
ANTXR1	1.30153	2.34988e-116	2.07372e-115
TUSC3	1.24178	4.4236e-116	3.88712e-115
GADD45B	0.794964	4.6174e-116	4.04022e-115
ECM2	2.11228	7.19339e-115	6.21521e-114
MAP3K7CL	2.06557	4.9534e-113	4.26198e-112
S1PR3	2.9484	4.33182e-109	3.66607e-108
GJC1	2.48476	7.77285e-107	6.36942e-106
MT1X	0.747247	1.76089e-105	1.42598e-104
SLC7A2	2.35866	6.06692e-105	4.87478e-104
FBLN1	1.09231	7.63481e-105	6.11081e-104
MSRB3	1.3223	9.75875e-105	7.78063e-104
ANGPT2	2.20168	3.44852e-104	2.70768e-103
TFPI	0.754075	7.92374e-103	6.12829e-102
FOXS1	2.39481	3.08442e-102	2.37661e-101
ARHGEF17	1.98171	1.12768e-101	8.59283e-101
LUM	0.919607	1.71323e-100	1.30067e-99
TCF21	2.25352	1.04714e-99	7.92066e-99
CNN1	2.39161	3.93185e-99	2.95246e-98
COL5A1	1.12583	5.73169e-99	4.28838e-98
MRVI1	2.52815	1.75267e-98	1.29723e-97
PMP22	0.822196	4.14254e-97	3.04425e-96
ITGA7	2.65757	8.28517e-97	6.06698e-96
HOXB-AS1	1.84602	8.59746e-94	6.18598e-93
C7	1.40685	1.1894e-93	8.52819e-93
PRR16	2.5141	2.32017e-92	1.65784e-91
OLFML2B	1.69714	5.85363e-90	4.11148e-89
TSC22D1	0.583988	3.60257e-88	2.47977e-87
LTBP1	1.11635	3.93934e-88	2.70257e-87
BICC1	1.23309	1.00024e-87	6.83936e-87
FABP4	1.24479	1.13783e-87	7.75449e-87
GNG11	0.585088	2.69573e-87	1.81918e-86
RCAN2	1.61637	2.64511e-86	1.76769e-85
MT1A	1.77313	3.4245e-86	2.26653e-85
SLC38A11	2.78675	3.54602e-86	2.33947e-85
COLEC11	2.31997	8.90084e-86	5.85358e-85
PDK4	0.911579	3.36091e-85	2.18937e-84
SERPINH1	0.636214	1.08997e-82	7.0118e-82
CTGF	0.841056	1.48599e-82	9.5002e-82
AMBP	2.24705	4.57993e-82	2.90109e-81
LBH	0.809402	8.67162e-82	5.45942e-81
STEAP4	1.92425	1.97572e-80	1.22152e-79
ABCC9	2.64186	1.55579e-79	9.5616e-79
CCL2	0.941081	2.88034e-79	1.75973e-78
EDNRB	1.67562	9.54845e-78	5.69871e-77
PHLDB1	0.982522	1.19649e-76	7.09986e-76
LGI4	2.75706	3.86218e-75	2.24659e-74
EGFL6	2.96554	7.15049e-75	4.12452e-74
LZTS1	2.87757	9.15725e-75	5.26733e-74
CFTR	1.33273	3.34338e-74	1.9178e-73
KLHL23	1.69535	3.84857e-74	2.19538e-73
ANGPT1	3.18786	1.2872e-72	7.24269e-72
TGFB3	1.73806	1.35386e-72	7.59707e-72
CYGB	1.30712	2.85897e-72	1.59561e-71
PPP1R12B	1.3631	4.48558e-70	2.45696e-69
ITGA1	0.808936	9.6638e-70	5.23773e-69
GPNMB	0.736761	3.92928e-69	2.11301e-68
FHL5	3.67716	5.54488e-68	2.9587e-67
C3	0.700241	5.54158e-67	2.9342e-66
TMEM38B	1.35256	9.04327e-67	4.77605e-66
SSPN	1.07425	2.1542e-66	1.1348e-65
MEG3	1.00206	7.06516e-66	3.71235e-65
SERPINA5	1.69773	1.11541e-65	5.83118e-65
SFRP5	1.94274	1.20193e-65	6.26765e-65
RBMS3	1.14736	5.92066e-65	3.05654e-64
OLFML3	1.07478	2.29457e-64	1.17868e-63
NFASC	2.55255	2.90502e-64	1.48855e-63
MRGPRF	2.48843	9.83755e-63	4.94271e-62
SGCA	3.00161	1.037e-62	5.1976e-62
MIR145	2.48029	2.03001e-62	1.015e-61
SEMA5A	1.89234	4.74453e-62	2.35515e-61
FMOD	1.47026	1.62293e-60	7.99844e-60
SNAI2	1.21702	1.91198e-60	9.40058e-60
ANGPTL1	2.86389	1.10078e-59	5.37381e-59
PARM1	1.4129	1.52496e-58	7.35759e-58
CSPG4	2.24557	5.56419e-58	2.66591e-57
CYR61	0.76617	1.15314e-57	5.49938e-57
RASL12	3.37015	7.32218e-57	3.43643e-56
SLC4A4	1.28004	6.09549e-56	2.84135e-55
CPM	0.882879	7.83231e-56	3.63455e-55
LEFTY1	1.85332	9.57085e-56	4.43135e-55
EFEMP1	1.09609	1.15648e-55	5.34258e-55
THBS4	1.96323	1.50761e-55	6.94913e-55
SCD5	1.40427	2.63989e-55	1.21412e-54
AKAP7	1.41955	1.76218e-54	8.0685e-54
MT1F	0.738257	7.76543e-54	3.5477e-53
CDH11	1.0355	1.41195e-53	6.43638e-53
ACTG2	2.2048	2.16842e-53	9.8413e-53
C1QTNF2	2.57062	2.29116e-53	1.03755e-52
FBN1	0.809837	4.59044e-53	2.07424e-52
AOC3	1.10187	1.73349e-52	7.765e-52
BEX1	1.93466	2.16093e-52	9.65872e-52
CTSK	0.763176	3.4423e-52	1.53528e-51
TGFBI	0.632763	1.3439e-51	5.91716e-51
SPP1	0.723878	2.85295e-51	1.24816e-50
PHGDH	1.47245	2.95207e-51	1.2888e-50
PMEPA1	0.508893	5.20617e-51	2.26331e-50
ITIH5	1.32568	1.46547e-50	6.33096e-50
CTRB2	0.543876	1.92558e-50	8.26677e-50
PLCE1	1.67213	2.43152e-50	1.04172e-49
F10	2.40423	8.14102e-50	3.4591e-49
MOCS1	2.27609	1.14412e-49	4.84142e-49
GLIPR2	0.787881	1.40921e-49	5.93883e-49
KCNMB1	1.4416	8.73568e-49	3.65166e-48
RERGL	3.43297	3.00154e-48	1.24712e-47
KCNK17	2.98876	5.61742e-48	2.32464e-47
SULF1	0.927437	2.88269e-47	1.17876e-46
PLTP	0.886578	3.15349e-47	1.28695e-46
KCNJ16	2.15962	5.16646e-47	2.10015e-46
TBX3	2.06609	6.03618e-47	2.44886e-46
FAM13C	1.29727	1.40733e-46	5.68716e-46
ISLR	0.892865	3.58715e-46	1.44677e-45
C2orf40	2.06296	3.90912e-46	1.57356e-45
C6	2.24789	6.07613e-46	2.43635e-45
FILIP1	1.09233	6.89074e-46	2.75763e-45
ELN	1.05952	1.34343e-45	5.32473e-45
SFRP2	0.686299	2.2647e-45	8.92481e-45
SGIP1	1.54042	5.05496e-45	1.9845e-44
RNF152	1.56712	3.67355e-44	1.4286e-43
STOM	0.452942	4.88869e-44	1.89758e-43
CTSL	0.426345	6.8703e-43	2.63213e-42
KCNJ15	1.40567	1.97591e-42	7.50047e-42
PTGER3	2.05277	3.09705e-42	1.17132e-41
SPON2	0.694986	2.43237e-41	9.05016e-41
HAND2	1.78416	6.3394e-41	2.35024e-40
SOD2	0.43795	1.23852e-40	4.56704e-40
SERPINI1	1.6175	2.80514e-40	1.02706e-39
FBXO32	0.685709	7.80082e-40	2.81129e-39
GPR4	1.41507	9.21533e-40	3.31527e-39
COL5A3	2.26561	1.16828e-39	4.19566e-39
FGF7	1.233	2.00102e-39	7.16135e-39
HEY2	2.89226	2.75139e-38	9.74551e-38
CERCAM	0.890797	5.36186e-38	1.89593e-37
THBS2	0.742733	8.28711e-38	2.92029e-37
FSTL3	0.757948	1.01283e-37	3.56301e-37
NR4A1	0.517724	1.3214e-37	4.6249e-37
VCAM1	0.934698	2.81733e-37	9.79425e-37
MUC6	0.918744	4.90659e-37	1.70002e-36
PRSS1	0.466294	6.49335e-37	2.24602e-36
VCAN	0.628592	7.38705e-37	2.55088e-36
POSTN	0.792846	9.69347e-37	3.33617e-36
TTYH1	2.2719	2.36817e-36	8.08311e-36
WFDC1	2.52784	2.69447e-36	9.18167e-36
ALDH1A1	0.522904	4.49144e-36	1.52046e-35
SFRP4	0.93477	9.74111e-36	3.2708e-35
SORBS2	0.628472	1.92097e-35	6.41877e-35
NREP	0.737533	2.03171e-35	6.76692e-35
SUSD2	1.77484	2.77579e-35	9.21546e-35
ABCA8	1.96696	9.36391e-35	3.08397e-34
INHBA	0.830486	1.09687e-34	3.60673e-34
ADRA2A	1.05915	2.11788e-34	6.94193e-34
SCTR	1.06544	2.34904e-34	7.68743e-34
GPBAR1	2.16188	3.20237e-34	1.04634e-33
SLC3A1	1.26969	6.31108e-34	2.0459e-33
HOMER2	1.30371	1.47202e-33	4.74216e-33
SERPINA6	2.1919	4.43331e-33	1.42155e-32
LYPD1	2.04085	1.24026e-32	3.9402e-32
EPAS1	0.399972	2.15042e-32	6.76924e-32
DNAJB4	0.683403	2.38316e-32	7.49045e-32
TDO2	2.98983	3.5991e-32	1.12438e-31
GPAT2	1.70091	7.43237e-32	2.31142e-31
CADM1	0.888694	1.91961e-31	5.93413e-31
VTN	2.244	4.85353e-31	1.49367e-30
ADAP2	1.24161	1.03901e-30	3.18333e-30
EBF2	2.70443	3.42121e-30	1.04354e-29
AGT	1.18503	1.3725e-29	4.14964e-29
CCDC3	1.0593	3.06556e-29	9.22796e-29
ADAMTS2	1.32001	6.00623e-29	1.79491e-28
TRPC6	2.96732	8.92487e-29	2.65943e-28
HAND2-AS1	1.88916	1.88042e-28	5.58714e-28
FIBIN	1.02404	1.9748e-28	5.85915e-28
CTRB1	0.488208	2.54971e-28	7.54321e-28
PCDH9	1.9354	3.04129e-28	8.98464e-28
RARRES1	0.766214	4.40044e-27	1.28346e-26
FOXF1	1.33846	5.11938e-27	1.49105e-26
PTK7	0.675489	6.27756e-27	1.8258e-26
HSPA2	1.35288	6.78663e-27	1.97108e-26
CLPS	0.525901	1.38402e-26	4.0028e-26
PROX1	1.66344	2.91065e-26	8.33634e-26
DCDC2	1.49157	3.60918e-26	1.03084e-25
LINC00671	2.48134	5.76244e-26	1.63679e-25
ATP1B2	3.39529	6.43252e-26	1.82211e-25
APOD	0.589343	8.97758e-26	2.53607e-25
EPHA3	2.02912	1.74503e-25	4.90939e-25
FGGY	1.00269	1.80206e-25	5.05605e-25
PTPRS	1.10555	2.39177e-25	6.70149e-25
RBPMS2	2.82356	4.35349e-25	1.21815e-24
RGS16	0.787877	7.44691e-25	2.07809e-24
ADH1B	1.90165	8.23368e-25	2.29454e-24
CITED4	0.834491	8.30933e-25	2.3125e-24
SYNM	2.01773	1.49342e-24	4.12839e-24
FBLN5	0.785447	1.55066e-24	4.28089e-24
MMP19	1.03229	3.93426e-24	1.08035e-23
PROCR	0.679188	8.36602e-24	2.28516e-23
CES1	1.23741	9.4961e-24	2.59042e-23
MMP11	0.458137	1.02934e-23	2.80421e-23
COL12A1	0.568666	2.27317e-23	6.18458e-23
OR51E1	3.66266	7.77475e-23	2.0932e-22
OGN	1.47052	9.33534e-23	2.50682e-22
NGF	3.28767	9.99791e-23	2.68126e-22
OLFML2A	0.97673	3.85534e-22	1.02594e-21
ZCCHC24	0.942826	4.54404e-22	1.20765e-21
GPR20	4.61109	4.66685e-22	1.2387e-21
PODN	1.03582	6.46186e-22	1.70636e-21
APCDD1	1.07514	1.72476e-21	4.5371e-21
REG1A	0.365465	1.87684e-21	4.93088e-21
CPB1	0.407544	2.1574e-21	5.65359e-21
CDO1	2.0402	5.79884e-21	1.51194e-20
TNFAIP6	0.97513	9.77892e-21	2.54006e-20
CTRC	0.415038	1.44703e-20	3.74451e-20
RASSF4	0.595717	1.61725e-20	4.17453e-20
ECM1	0.489006	2.32252e-20	5.98005e-20
REM1	2.88148	3.13096e-20	8.0516e-20
NRIP2	3.0543	6.75472e-20	1.7263e-19
SLC17A4	2.59097	9.70482e-20	2.47108e-19
GPC3	1.31258	1.14518e-19	2.90872e-19
ANO1	0.741438	1.54075e-19	3.89907e-19
GPM6B	0.921955	1.72566e-19	4.35633e-19
LOXL1	0.600627	1.7528e-19	4.41945e-19
CCL21	1.32017	2.13592e-19	5.37888e-19
SERPINE2	0.729757	2.75586e-19	6.91476e-19
RASGRP2	0.64766	2.7677e-19	6.93604e-19
NR2F1	0.985705	3.6849e-19	9.21226e-19
NID2	1.09671	3.90317e-19	9.74613e-19
TMEM47	0.546226	4.93228e-19	1.23009e-18
TMEM204	0.401989	5.96267e-19	1.48348e-18
LDB3	3.68692	2.08118e-18	5.11623e-18
PI15	2.84314	3.29684e-18	8.08548e-18
CPA1	0.417515	4.38545e-18	1.07298e-17
CCL19	1.00815	4.55799e-18	1.11388e-17
PDGFRA	0.848961	8.25703e-18	2.00834e-17
GMNN	0.709575	1.07246e-17	2.59933e-17
LTBP2	0.843893	1.11755e-17	2.70545e-17
PLA2G1B	0.427916	1.53589e-17	3.71383e-17
CTHRC1	0.409304	2.03468e-17	4.91416e-17
TMEM119	1.0547	3.17556e-17	7.65173e-17
GAS1	0.793306	3.57283e-17	8.59895e-17
COL8A1	0.603382	5.13733e-17	1.23069e-16
UGT2A3	1.01503	5.68838e-17	1.36112e-16
CYP1B1	0.760432	6.94839e-17	1.65305e-16
PRSS23	0.283097	1.04656e-16	2.47272e-16
SBSPON	2.62913	1.06355e-16	2.50997e-16
SCN4B	2.78485	2.40263e-16	5.63159e-16
KCNAB1	3.10005	3.4676e-16	8.08192e-16
FRMD3	1.43683	4.52804e-16	1.05416e-15
TFPI2	0.884593	4.74786e-16	1.10409e-15
CA4	1.47304	4.89833e-16	1.1378e-15
RUNX1T1	0.726182	7.9604e-16	1.84492e-15
SCRG1	1.3345	8.81538e-16	2.04078e-15
FGFR1	0.50076	1.57761e-15	3.6278e-15
C21orf62	2.81578	1.74658e-15	4.01188e-15
CCR10	1.82694	2.93815e-15	6.70418e-15
KCNA5	3.73463	3.0447e-15	6.93962e-15
CNGA1	1.9028	3.15749e-15	7.18085e-15
NEURL1B	0.599497	3.64021e-15	8.26048e-15
HTRA3	0.677371	4.48429e-15	1.01647e-14
MRC2	0.669811	6.2042e-15	1.40018e-14
EDIL3	0.618885	8.82181e-15	1.98227e-14
CD302	0.450867	3.23194e-14	7.20729e-14
CITED2	0.376941	3.88545e-14	8.63667e-14
ZNF331	0.590775	3.98194e-14	8.84163e-14
MOXD1	0.977111	4.09195e-14	9.07614e-14
PXDN	0.50255	4.55143e-14	1.00736e-13
APOLD1	0.368427	4.86968e-14	1.0755e-13
FAP	0.50285	6.14289e-14	1.3538e-13
CELA3A	0.323427	7.99131e-14	1.75554e-13
FAM129A	0.617149	9.88549e-14	2.16704e-13
PAMR1	1.98982	1.13995e-13	2.49365e-13
NGFR	2.01897	1.58237e-13	3.45047e-13
FBLN2	0.525383	1.62152e-13	3.53211e-13
APOBEC2	2.51688	1.85599e-13	4.0301e-13
ANGPTL2	0.629561	1.90428e-13	4.13061e-13
RASD2	2.65168	5.57401e-13	1.19899e-12
CHST2	1.39684	6.89718e-13	1.47899e-12
HRC	3.33398	8.61034e-13	1.84443e-12
SSTR2	2.96346	1.00989e-12	2.16105e-12
LOX	0.635065	1.11033e-12	2.37352e-12
ERP27	1.19536	1.69453e-12	3.61115e-12
SVEP1	1.30978	3.21519e-12	6.78178e-12
BCAM	0.317981	3.37769e-12	7.11001e-12
PNLIP	0.462758	3.41976e-12	7.19125e-12
PAG1	0.470117	3.49273e-12	7.33722e-12
HSPB7	2.55601	3.69064e-12	7.74509e-12
ADAMTS9	0.380456	3.78514e-12	7.93533e-12
F2R	0.430519	4.47079e-12	9.35378e-12
IFITM1	0.24409	5.54106e-12	1.15696e-11
HSD11B1	1.26789	6.75692e-12	1.40514e-11
FMO2	1.39276	9.4073e-12	1.94845e-11
PDGFA	0.575986	1.60876e-11	3.31216e-11
IGF1	0.996803	1.65957e-11	3.41337e-11
PTGER1	2.01355	2.3785e-11	4.86779e-11
SLIT2	1.03425	2.52456e-11	5.1616e-11
LAMA2	1.13051	2.93257e-11	5.97804e-11
HIC1	0.786401	6.44791e-11	1.30283e-10
RBP4	0.844373	7.48959e-11	1.50888e-10
MEDAG	1.1469	7.88467e-11	1.58692e-10
MLLT11	0.747891	8.25827e-11	1.6605e-10
LINGO1	3.388	8.85422e-11	1.77859e-10
RIC3	0.542382	9.75155e-11	1.95504e-10
LPL	1.31404	1.14799e-10	2.29487e-10
IFIT3	0.44194	1.3044e-10	2.60249e-10
KIF12	0.579999	2.25818e-10	4.4881e-10
LOXL2	0.589399	2.39749e-10	4.74671e-10
PDGFD	0.5644	4.23914e-10	8.32904e-10
PDGFRL	0.571566	4.99319e-10	9.79196e-10
FMO3	1.71497	5.08227e-10	9.95719e-10
DPT	0.951099	5.14643e-10	1.00638e-09
AGTR1	2.3809	5.37428e-10	1.04895e-09
MUSTN1	4.36895	1.00767e-09	1.95567e-09
NR4A3	0.848654	1.02886e-09	1.99493e-09
C5orf38	2.60254	1.07621e-09	2.08477e-09
LRRC10B	3.34685	1.17401e-09	2.26998e-09
NPY1R	1.58083	1.26011e-09	2.43189e-09
CASQ2	3.56369	1.26567e-09	2.44035e-09
C2	0.712905	1.35741e-09	2.61478e-09
RAMP1	0.348398	1.90048e-09	3.63715e-09
ITGBL1	0.653825	1.97422e-09	3.77129e-09
TMEM100	1.3626	2.33907e-09	4.46e-09
ANK2	1.73979	4.00495e-09	7.59433e-09
NOVA1	1.08084	6.67806e-09	1.2548e-08
CCL26	1.41211	7.33576e-09	1.37712e-08
NRARP	0.725046	7.75781e-09	1.45371e-08
REG1B	0.225438	8.03491e-09	1.50291e-08
LAMP5	0.823838	8.45853e-09	1.58071e-08
ATP1A2	3.51802	1.70827e-08	3.15525e-08
MFAP2	0.345923	2.57642e-08	4.74181e-08
LSAMP	0.922	2.83783e-08	5.21363e-08
TWIST1	0.944142	2.86364e-08	5.25638e-08
CA2	0.410341	4.27511e-08	7.82633e-08
PTPRG	0.303927	5.16491e-08	9.42185e-08
ALG9	1.0819	6.09282e-08	1.10754e-07
SUSD5	3.63417	6.61275e-08	1.19889e-07
HRH2	1.38009	7.26197e-08	1.31544e-07
TMEM45A	0.275614	7.66073e-08	1.38524e-07
ARHGAP29	0.21625	7.70445e-08	1.39192e-07
CREM	0.222949	8.97394e-08	1.61001e-07
FJX1	1.0121	1.09733e-07	1.96019e-07
CD4	0.383384	1.11637e-07	1.99076e-07
SCN7A	1.44841	1.21789e-07	2.16618e-07
PTGIS	0.698706	1.28134e-07	2.27122e-07
ENC1	0.387518	1.40453e-07	2.48319e-07
GGT1	0.629444	1.63118e-07	2.8765e-07
HTRA1	0.197932	1.68358e-07	2.96638e-07
SCN3A	2.54802	1.72436e-07	3.03306e-07
COL10A1	0.331593	2.86407e-07	4.99519e-07
LRRC17	0.804642	3.69038e-07	6.40389e-07
AC073218.2	2.16218	4.82479e-07	8.35839e-07
FMO1	1.22045	5.39724e-07	9.31882e-07
GC	1.70418	5.92643e-07	1.02154e-06
TNC	0.948558	7.71053e-07	1.32025e-06
MATN3	0.492208	8.9808e-07	1.53521e-06
TMEM158	0.597118	1.31504e-06	2.23319e-06
BEX2	0.488	1.4504e-06	2.45901e-06
PPP1R1B	0.490341	1.50299e-06	2.54607e-06
PTGDS	0.490508	1.79306e-06	3.03248e-06
PDPN	0.458573	1.80176e-06	3.0447e-06
DES	2.91127	2.06203e-06	3.47599e-06
NTM	0.51567	2.3032e-06	3.87621e-06
PAPPA	1.1336	2.32763e-06	3.91414e-06
OMD	0.583	2.74768e-06	4.5943e-06
CCL8	2.06705	2.9992e-06	5.01081e-06
C9orf47	3.26702	3.55287e-06	5.90714e-06
CD36	0.434818	3.80058e-06	6.29871e-06
SYCN	0.280983	5.31103e-06	8.7319e-06
ADAM12	0.6038	5.85557e-06	9.60425e-06
SNHG15	0.290113	6.4075e-06	1.04929e-05
ARHGAP24	0.233478	8.74693e-06	1.4256e-05
CST2	1.15804	1.0622e-05	1.7244e-05
CHRDL1	1.48249	1.2013e-05	1.94563e-05
PLA2G2A	0.771495	1.30218e-05	2.10407e-05
PTH1R	2.28676	1.46164e-05	2.3562e-05
ABI3BP	0.671711	1.60485e-05	2.58504e-05
SNCG	0.30588	2.49153e-05	3.98837e-05
GATM	0.351693	2.50534e-05	4.00738e-05
ACAN	3.27334	2.56146e-05	4.09063e-05
LAMC3	2.14874	2.68727e-05	4.2818e-05
CFH	0.173778	2.81047e-05	4.47121e-05
C4BPA	1.39861	2.90619e-05	4.61638e-05
WDR74	0.187933	3.72152e-05	5.87534e-05
PAH	2.29131	4.45757e-05	7.01057e-05
ALDH1A3	0.483009	4.63632e-05	7.28615e-05
COL16A1	0.30784	5.04313e-05	7.90742e-05
GREM1	0.539771	5.20081e-05	8.13611e-05
UCHL1	0.476069	5.24086e-05	8.19256e-05
C16orf89	1.36109	5.88566e-05	9.17968e-05
BOC	0.503439	7.92078e-05	0.000122796
REG3A	0.195313	9.35254e-05	0.00014445
NTRK3	3.22401	0.000103689	0.000159909
ABCA6	0.840252	0.000114671	0.00017645
SCG5	0.357129	0.000123189	0.000189134
ANGPTL4	0.27904	0.000139421	0.00021342
NEGR1	0.693477	0.000145152	0.000222028
COL9A1	2.51837	0.000151434	0.000231296
S100A1	1.27196	0.000237341	0.000361705
SERPINE1	0.266026	0.000292185	0.000443323
CILP	0.938524	0.000314718	0.000476811
CD163L1	1.01644	0.000316245	0.000478422
FAM46A	0.216715	0.000373113	0.000562804
EGR2	0.492865	0.000396685	0.000597923
SMTNL2	3.02379	0.000399917	0.000602355
FNDC1	0.387754	0.000470033	0.000704367
CELA3B	0.20204	0.000544348	0.000811609
CLDN11	0.799303	0.00058806	0.000874888
GAS7	0.48597	0.000620483	0.00092246
SPOCK1	0.453221	0.000784041	0.00116144
CNR1	1.48742	0.00100519	0.00147949
FZD1	0.330653	0.00115024	0.00168697
ADRA2B	2.30583	0.00118399	0.00173523
IRX2	2.45983	0.00119941	0.00175658
CFB	0.223894	0.00135342	0.00197653
IFIT2	0.345052	0.00150518	0.00219042
WNT6	2.2881	0.00155194	0.0022537
TIMP4	1.66354	0.00172665	0.00250038
RRAD	0.849601	0.00174796	0.00252945
ADAMTS8	2.36634	0.00177729	0.0025701
FBLN7	0.627282	0.00184459	0.00266183
S1PR5	1.74055	0.00192354	0.00277382
BCL2	0.334725	0.00217937	0.00313616
ITGA8	1.14897	0.00230966	0.00331903
CRP	0.763129	0.00233792	0.00335497
COMP	0.343872	0.00247095	0.00354341
BRSK2	1.79182	0.00257838	0.0036949
DIO2	0.485099	0.00287115	0.00410591
OSR2	0.637941	0.00346022	0.00492783
MMP2	0.162871	0.00349723	0.00497711
PLEKHF1	0.353656	0.00384832	0.00544242
XBP1	0.0858408	0.00400393	0.00564762
SCG2	0.757028	0.00492924	0.00690562
TSLP	1.4741	0.00580533	0.00810548
DLX5	1.07568	0.00636984	0.00888165
HAS1	0.963443	0.00645171	0.00898973
MT1G	0.10173	0.00667988	0.00930139
CCL4	0.199252	0.00676207	0.00940949
CFD	0.234546	0.00710457	0.00987278
SFRP1	0.948436	0.00725486	0.0100681
CLSTN2	1.44881	0.0073274	0.0101619
APCS	0.863811	0.00750226	0.0103905
SLC19A2	0.335548	0.00785666	0.0108522
CHI3L1	0.597924	0.00850744	0.0117275
AC017002.1	0.783093	0.00875083	0.012055
PLA2G5	1.72997	0.00891853	0.0122697
AMY2A	0.270672	0.00928745	0.0127602
CYP27A1	0.261482	0.00943165	0.0129497
CPA2	0.129578	0.00991458	0.0135857
MFAP5	0.210232	0.0100673	0.0137767
CH25H	0.553169	0.0103499	0.0141539
GZMK	0.318585	0.0108895	0.0148722
CBLN4	1.83999	0.0116116	0.015827
CFHR1	2.52801	0.0120583	0.0164142
GZMA	0.330402	0.0123455	0.0167831
PTX3	1.21005	0.0125045	0.016988
IFIT1	0.231076	0.012654	0.0171685
F2RL2	1.37463	0.0137418	0.0186078
ADAMTSL2	0.375894	0.0142229	0.0192214
FGA	1.07277	0.0143306	0.0193542
CELA2A	0.257852	0.0147205	0.0198548
FOLR1	0.430738	0.0154384	0.0207804
PEG10	0.382417	0.0166111	0.0223029
HAS2	0.700043	0.018009	0.0241171
RGS4	0.685117	0.019172	0.0256081
NCAM1	1.05495	0.0192211	0.0256571
HIST1H4C	0.0744865	0.0194105	0.0258932
ADAMTS15	1.87454	0.0196611	0.0262106
MMP23B	0.243593	0.0218556	0.0290985
SCGN	0.639004	0.02194	0.0291921
RASL11B	0.762102	0.0241935	0.0321173
COLEC12	0.356426	0.0242008	0.0321173
CYFIP2	0.236958	0.026754	0.0354148
FKBP11	0.126125	0.0273787	0.0361721
SUGCT	0.250747	0.0275685	0.0363996
ECEL1	1.81758	0.0346367	0.0452403
ERRFI1	0.0837847	0.0366175	0.0476767
CRIP1	0.0538866	0.0379905	0.049402
TMSB15A	1.3311	0.0410051	0.0531882
GP2	0.106106	0.0439056	0.056701
MEST	0.211857	0.0502777	0.0644867
NPTX2	0.717245	0.0521732	0.0667107
PRF1	0.439652	0.0525251	0.0671191
WNT5A	0.365772	0.0532488	0.0679597
NRGN	0.405292	0.0537809	0.0685964
DPEP1	0.431311	0.059126	0.0751818
IL6	0.495599	0.0603838	0.0765925
DDIT4L	1.72339	0.0627368	0.0795282
RND3	0.0974623	0.0651254	0.0824549
CCL11	0.514946	0.0711416	0.089687
CXCL12	0.0609126	0.0773467	0.0970358
CTSW	0.383114	0.0782253	0.0980785
SLC37A4	0.330424	0.0794748	0.0994639
C1QTNF4	0.90578	0.0795499	0.0994976
CCL13	0.955256	0.0796628	0.0995785
MYC	0.0901366	0.0868108	0.107969
OSR1	1.13299	0.0896691	0.111145
DEFB1	0.251103	0.0904203	0.112008
SNORD3D	0.427086	0.0913505	0.113025
ADAMTS5	0.644027	0.0977795	0.120474
TTR	0.127333	0.100657	0.123651
CXCL14	0.143792	0.103638	0.127086
P2RY14	0.658235	0.106346	0.130175
CXCL6	0.230994	0.107937	0.131887
SFTA1P	0.863035	0.116441	0.141683
PTGDR	1.14273	0.128469	0.154597
GZMH	0.364781	0.133199	0.159731
WISP2	0.578585	0.142816	0.170471
SERPINA4	0.293058	0.148427	0.176658
ISM1	0.395234	0.151895	0.180266
ENPP1	0.348802	0.153138	0.181532
STAT4	0.237804	0.153272	0.181588
TCEAL2	0.967374	0.154254	0.182646
DNAAF1	0.656096	0.15747	0.186347
NUAK2	0.307751	0.158467	0.187419
SESN1	0.079866	0.16301	0.192241
LTF	0.731662	0.164422	0.193796
LRRN3	0.967189	0.165259	0.194671
FGG	0.982142	0.167233	0.196885
DIRAS3	0.370953	0.173572	0.203651
CD8B	0.30178	0.173987	0.204022
S100A12	0.761345	0.175746	0.205968
CCDC71L	0.179608	0.184789	0.216198
CD8A	0.297779	0.185266	0.216511
CCL5	0.159884	0.188989	0.220487
CEL	0.0202601	0.211508	0.245098
COL8A2	0.216357	0.215265	0.249171
PRG4	0.948635	0.217597	0.251589
STRA6	0.37256	0.219899	0.253966
INMT	0.128073	0.224259	0.258568
CSAG1	0.47533	0.231477	0.266592
MPZ	0.598749	0.252629	0.289737
MIR205HG	0.20103	0.258296	0.29583
AQP9	0.330518	0.268378	0.306866
IL2RB	0.317886	0.271079	0.309783
HOTAIRM1	0.106322	0.277939	0.317097
NKG7	0.203881	0.280813	0.320022
COL11A1	0.068498	0.290736	0.330782
FABP3	0.281306	0.297218	0.33797
BASP1	-0.0471331	0.325564	0.36939
KLRC1	0.473109	0.332428	0.376557
CRLF1	0.745489	0.355638	0.401746
GCG	0.183062	0.362626	0.409193
GLDN	0.609301	0.372123	0.418826
APOBEC3G	0.0888168	0.389337	0.436946
PGM5-AS1	0.706169	0.390525	0.438041
FST	0.231179	0.391626	0.438828
PTCH2	0.119937	0.393816	0.441014
SAMD3	0.306276	0.397713	0.445136
PPP1R1A	0.6357	0.39804	0.445261
SNORD3B-2	0.540048	0.423922	0.469383
IL1RL1	0.534529	0.435293	0.480685
TNFSF14	0.317763	0.451611	0.497374
CDH13	0.17009	0.458066	0.502981
ASB2	0.312828	0.458163	0.502981
DLK1	0.287237	0.477681	0.521228
CCL7	0.481627	0.477813	0.521228
STMN2	0.177568	0.478289	0.521471
PNLIPRP1	0.0317954	0.488224	0.531181
APOBEC3A	0.688176	0.506099	0.550049
KLRD1	0.330554	0.520113	0.564686
GZMM	0.147651	0.531112	0.57572
CCDC144A	0.208444	0.531653	0.576004
COCH	0.29323	0.539667	0.584073
CLDN10	0.264408	0.543018	0.587392
ITGA11	0.140983	0.546672	0.590417
XCL2	0.337088	0.54844	0.591708
KCNMA1	0.127186	0.548809	0.591796
PCSK1	0.35192	0.55714	0.600467
CXCL9	0.20914	0.560031	0.603268
FAM3B	0.154742	0.580799	0.623363
APOBEC3C	0.0327601	0.592249	0.635321
CLDN14	0.542938	0.597405	0.640519
FGFBP2	0.586864	0.60093	0.643631
NPR3	0.296208	0.614518	0.657843
MMP14	0.0213417	0.61638	0.659494
IPCEF1	0.101501	0.621639	0.664089
PI16	0.271705	0.63152	0.673252
KRT5	0.0742176	0.64038	0.681832
SNORD3B-1	0.23714	0.640722	0.681832
ITGA4	-0.0394877	0.640889	0.681832
JAKMIP1	0.463631	0.645792	0.686341
TMEM130	0.342492	0.662096	0.702584
ZNF683	0.396127	0.677977	0.717592
EOMES	0.376985	0.680818	0.719492
APOBEC3H	0.260888	0.6817	0.720057
CAMK4	-0.0112807	0.689097	0.727498
TBX21	0.277329	0.692491	0.730707
HIST1H1E	0.0526386	0.693777	0.73169
XCL1	0.316081	0.69687	0.734202
MAF	0.040105	0.702321	0.739191
CISH	0.153186	0.719389	0.756384
FPR2	0.25393	0.724247	0.761105
BACH2	-0.00836953	0.74237	0.778712
MATK	0.125151	0.74251	0.778712
CHGB	0.182665	0.748486	0.784581
SLAMF9	0.231587	0.753526	0.789114
ACKR3	0.0978453	0.753575	0.789114
RSPO3	0.072244	0.759913	0.79414
FLT3LG	0.0581325	0.760934	0.794805
GABRD	0.174515	0.76785	0.801623
CST4	0.2156	0.774408	0.807245
LMCD1	-0.00843068	0.792907	0.824448
FGL1	0.421996	0.801901	0.832542
GPR155	0.029136	0.813244	0.843047
SLC34A2	0.0811428	0.821381	0.850201
ADAM19	-0.028237	0.826474	0.855044
TPSAB1	0.138685	0.841874	0.8675
LAG3	0.164563	0.842472	0.867683
SRGAP3	0.100186	0.844053	0.868639
APBA2	0.0211215	0.844242	0.868639
IFNG	0.443065	0.84611	0.870128
PCOLCE2	0.239368	0.850858	0.874575
IGFL2	0.0474378	0.862556	0.885718
KLK4	0.246091	0.867137	0.889565
IL11	0.21603	0.87777	0.898734
MIR503HG	0.0830952	0.880397	0.900902
CXCR6	0.103932	0.881775	0.901865
DIO3	0.0823899	0.889048	0.908007
CCL4L2	0.206123	0.889099	0.908007
SOX11	0.116078	0.89073	0.909223
HHIP	0.0923452	0.891853	0.909437
APOA4	0.124503	0.892261	0.909437
LXN	0.0749675	0.898395	0.914684
CHIT1	0.17876	0.898738	0.914684
LINC00261	0.102193	0.912683	0.927506
THEMIS	0.00851411	0.916756	0.931186
GAD2	-0.0218653	0.917389	0.931371
TNIP3	0.163002	0.919838	0.933399
SCUBE3	0.196681	0.920615	0.933728
CA3	0.316341	0.926455	0.937809
CD300E	0.109191	0.938577	0.947293
WDR66	-0.0319598	0.954262	0.961848
CCL3L1	0.164668	0.968603	0.974348
AKR1C1	0.109463	0.970798	0.975997
PTPRN	-0.0264008	0.971723	0.976002
RBP2	0.229391	0.979937	0.982792
GRAP2	-0.0358913	0.981001	0.983382
FGD3	-0.0296643	0.984808	0.986576
MYOM2	0.218727	0.985143	0.986576
RGS3	0.0614426	0.987573	0.98853
VSNL1	0.0111654	0.99068	0.991159
PIF1	0.0120215	0.999338	0.999338
LUCAT1	0.0421297	0.978547	0.981876
SLC16A6	0.0499473	0.975592	0.979386
CTSC	-0.0175297	0.971748	0.976002
PYHIN1	-0.0240165	0.968686	0.974348
LILRA5	0.0316591	0.958945	0.965491
KCNA3	-0.0285636	0.954861	0.961848
KLRC2	0.200056	0.954688	0.961848
TRIB3	0.0394368	0.941282	0.949559
HP	0.0289491	0.935585	0.944735
SLFN12L	0.0191795	0.931636	0.941208
TXK	-0.105234	0.931277	0.941208
SCG3	-0.0997192	0.93105	0.941208
KLRG1	0.0185845	0.928129	0.939043
KRT86	0.108779	0.925534	0.937336
ZAP70	-0.0120013	0.922013	0.934228
KLRF1	0.195748	0.921125	0.933787
RGL4	-0.0782339	0.907091	0.922276
PCP4	-0.0866086	0.901179	0.916717
PCSK2	-0.115668	0.898465	0.914684
DHRS2	-0.099498	0.891387	0.909437
LGMN	-0.00246821	0.885789	0.905522
GFI1	0.0267362	0.877843	0.898734
GRP	-0.0453133	0.877574	0.898734
CXCL13	0.0708684	0.874252	0.89639
CALML5	-0.185658	0.867164	0.889565
SLC30A8	-0.13773	0.862361	0.885718
SLA2	-0.00725941	0.835507	0.861369
PDCD1	-0.0627419	0.832278	0.858468
NEUROD1	-0.210452	0.831996	0.858468
CD96	-0.00733076	0.831742	0.858468
CRTAM	0.0208133	0.831226	0.858468
CST1	0.141471	0.831021	0.858468
TNFRSF9	-0.120649	0.827761	0.855947
HILPDA	0.0154423	0.81972	0.848908
TUBB2B	0.0015456	0.818573	0.848145
TNFSF4	-0.112467	0.811865	0.84204
SCT	-0.134117	0.80716	0.837581
IL10	-0.132613	0.79961	0.830581
TMIGD2	-0.0709555	0.798008	0.829334
REG3G	-0.182872	0.786061	0.817741
PTHLH	-0.121656	0.783778	0.815777
NRG1	-0.230382	0.782926	0.815301
FOXP3	-0.186094	0.775403	0.807874
MARCO	0.0624233	0.77139	0.804505
GADD45G	0.11115	0.770198	0.803668
LINC00861	-0.101313	0.756747	0.791231
NKX2-2	-0.300824	0.755917	0.790764
CHGA	-0.053852	0.755258	0.790476
PLA2G7	-0.0358858	0.742017	0.778712
CD3G	-0.0460604	0.732778	0.769678
SPINK2	-0.26556	0.712134	0.749137
OTOA	-0.120504	0.701663	0.738875
CCL18	0.0481416	0.696463	0.734148
HBA2	-0.0276206	0.680528	0.719492
ABCC8	-0.163808	0.678996	0.718302
SH2D1A	-0.0878514	0.677892	0.717592
CELA2B	-0.181744	0.675341	0.715536
FDCSP	0.00455946	0.674079	0.714565
HIST1H2AK	-0.327177	0.671745	0.712457
G6PC2	-0.332718	0.657118	0.69766
NSG1	-0.259774	0.650894	0.691407
SCGB3A1	-0.00321859	0.642405	0.683093
IL1B	0.0330185	0.632799	0.674267
MME	-0.0840896	0.629227	0.671153
SLC7A5	-0.0106845	0.627433	0.669587
NPL	-0.0558015	0.623093	0.665298
UGT2B15	0.0503772	0.620796	0.663532
NLGN4X	-0.257052	0.619902	0.66292
KIT	-0.233071	0.597827	0.64064
UBASH3A	-0.342365	0.580764	0.623363
KCNE1	-0.293383	0.577859	0.620853
ARL4D	-0.0566676	0.573891	0.61691
PRKCQ-AS1	-0.180767	0.57205	0.615252
EGR3	-0.0515524	0.566096	0.609166
PIK3R6	-0.57701	0.563321	0.606496
CD28	-0.325939	0.548293	0.591708
ZCCHC18	-0.616428	0.546283	0.590306
PVRIG	-0.651021	0.543495	0.587601
ICOS	-0.307996	0.537004	0.581496
LY6H	-0.32956	0.524795	0.569171
TSPAN32	-0.29413	0.522782	0.567286
MEI1	-0.149617	0.509362	0.553304
KRT14	-0.406494	0.497941	0.541468
SCML4	-0.322752	0.487505	0.530679
SIRPG	-0.25444	0.485694	0.528987
ITK	-0.242455	0.483312	0.52667
MIR7-3HG	-0.34046	0.477674	0.521228
ALB	-0.112486	0.475646	0.519687
SIGLEC1	-0.206011	0.472677	0.516717
CR1	-0.636715	0.47041	0.514511
ZBED2	-0.50268	0.470406	0.514511
CCR5	-0.274979	0.468026	0.512446
CTLA4	-0.30247	0.467258	0.511876
CSF3	-0.3754	0.461715	0.506073
C11orf21	-0.454391	0.461396	0.505992
LINC00954	-0.576498	0.460007	0.504737
CYP26A1	-0.580384	0.455674	0.50078
UNC5B	-0.0498702	0.453883	0.499078
IGFBP2	0.00462532	0.452697	0.498039
TRAT1	-0.233264	0.451955	0.497488
TIGIT	-0.11189	0.447715	0.493346
APOC2	-0.458096	0.446481	0.49225
CADM3	-0.623284	0.438924	0.484176
AP003774.1	-0.776781	0.438038	0.483458
GSTA2	-0.236639	0.430069	0.47517
TNF	-0.292418	0.429892	0.47517
BFSP2	-0.784818	0.42736	0.472683
LRRC15	-0.18428	0.424736	0.470032
LAX1	-0.480678	0.422694	0.468274
LEF1	-0.117773	0.420853	0.466485
GBP1	-0.00217981	0.419853	0.465626
CXCR3	-0.13543	0.41944	0.465418
CXCL10	0.113012	0.417571	0.463594
CHST1	-0.255539	0.41673	0.462909
C5orf46	-0.0942991	0.416524	0.462909
FGF19	-0.774828	0.416059	0.462661
RCSD1	-0.225322	0.415168	0.461919
HBA1	-0.193284	0.412093	0.458745
AC022182.3	-1.0212	0.410093	0.456765
GZMB	0.0755539	0.40947	0.456317
EIF1AY	-0.132632	0.408541	0.455527
CUZD1	-0.168583	0.406916	0.453961
CLNK	-0.804474	0.406814	0.453961
LTA	-0.828103	0.401628	0.448546
KCNJ2	-0.581533	0.400979	0.448064
CCND1	0.0127392	0.400189	0.447423
KRT81	-0.481989	0.391652	0.438828
CD70	-0.342974	0.384613	0.431879
CLDN2	0.0459816	0.381434	0.428542
IAPP	-0.0967958	0.378234	0.425179
CCL22	-1.04889	0.372627	0.419104
IRF4	-0.655051	0.372177	0.418826
OSM	-0.208798	0.372144	0.418826
TNFSF8	-0.6919	0.368873	0.415788
ESM1	-0.488953	0.366523	0.413364
ADAMDEC1	-0.50128	0.36187	0.408563
CD5	-0.293702	0.351521	0.397313
EPYC	-0.497877	0.345464	0.390681
S100A7	-0.551471	0.343872	0.389094
MAL	-0.5973	0.333857	0.377969
TNFRSF17	-0.379249	0.331634	0.375864
MYBL1	-0.509938	0.331402	0.375807
SOCS2	-0.138966	0.321444	0.364916
TNFAIP3	-0.0444616	0.30232	0.343395
CDH19	-0.673413	0.300654	0.34169
C5AR1	-0.135985	0.286295	0.325909
CYP3A4	-0.766678	0.284258	0.323769
SLAMF7	-0.211611	0.280555	0.319904
RUNX2	-0.108023	0.272905	0.311525
PAX6	-0.698611	0.271622	0.310231
SNAI1	-0.174244	0.266903	0.305349
TNNC1	-0.202728	0.259857	0.297452
SLC8A1	-0.204503	0.258228	0.29583
AICDA	-1.39428	0.252696	0.289737
GTSF1	-0.646351	0.250975	0.288085
PCSK1N	-0.0594539	0.245136	0.281538
FCRL5	-0.543048	0.239895	0.275673
CXCL11	-0.112533	0.239631	0.275522
HAMP	-0.298691	0.23897	0.274915
GNG7	-0.135522	0.23172	0.266724
RPPH1	-0.418247	0.226002	0.260432
MRC1	-0.636696	0.223565	0.257912
MMP10	-0.849237	0.222129	0.256399
CRTAC1	-0.572824	0.219166	0.253262
BCYRN1	-0.427965	0.216003	0.249886
C1QTNF3	-0.165583	0.214961	0.24896
AQP8	-0.657521	0.210773	0.244383
BCL11A	-0.461182	0.208132	0.241457
IDO1	-0.848693	0.205324	0.238333
NELL2	-0.506135	0.202863	0.235609
BTLA	-0.73337	0.202814	0.235609
SIDT1-AS1	-0.961171	0.1989	0.231266
LINC00426	-0.840322	0.197284	0.229517
GINS2	-0.324299	0.195964	0.22811
CCR1	-0.217554	0.193534	0.225408
PPM1K	-0.151176	0.191129	0.222732
CD247	-0.141424	0.189363	0.220798
PKHD1L1	-1.24407	0.188844	0.220443
ITLN1	-1.03466	0.186741	0.218111
ITGAL	-0.280919	0.185236	0.216511
APOA1	-0.287132	0.182563	0.213715
HIF1A-AS2	-0.577382	0.179792	0.210591
RNU12	-0.119875	0.170947	0.200685
MTRNR2L1	-0.321703	0.170199	0.199921
PAEP	-0.770541	0.168509	0.198048
SERPINI2	-0.730678	0.167945	0.197498
CLSPN	-0.355592	0.167918	0.197498
GPR171	-0.278358	0.162698	0.191984
HBB	-0.0900071	0.162283	0.191603
KLK5	-1.11803	0.160215	0.18927
GJA5	-0.425289	0.159388	0.188401
CD40LG	-0.495602	0.152781	0.181213
SASH1	-0.130245	0.150377	0.178567
IL12RB1	-0.403224	0.150081	0.178318
FCRL3	-0.947548	0.150013	0.178318
CX3CR1	-0.860113	0.148899	0.177118
SLC16A10	-0.358852	0.148027	0.176284
CTRL	-0.659178	0.1474	0.175638
CCL3	0.0393412	0.14713	0.175417
PNMT	-1.25538	0.143537	0.171232
TMEM178A	-1.08637	0.141289	0.168746
C1orf228	-0.44578	0.140119	0.167445
LYNX1	-0.329938	0.139698	0.167039
SERPINB2	-0.637496	0.138165	0.165301
CD300LG	-1.48377	0.137561	0.164674
GBP5	-0.273051	0.136398	0.163377
TREM1	-0.175379	0.135212	0.16205
SOWAHD	-1.13312	0.132893	0.159456
SNX22	-0.738246	0.131987	0.158461
FCN1	-0.121346	0.128999	0.154964
CD6	-0.289412	0.128949	0.154964
PARP15	-0.594953	0.128568	0.154626
SH2D6	-0.893115	0.128462	0.154597
SLC31A2	-0.134031	0.127812	0.153986
SHISA2	-0.288633	0.127305	0.153465
FOSB	-0.0458848	0.127199	0.153426
KLHDC7B	-0.751883	0.124781	0.150598
NLRP3	-0.450569	0.124705	0.150594
GHRL	-0.439208	0.124597	0.150552
SYTL3	-0.216161	0.122562	0.148179
MIAT	-0.358115	0.122561	0.148179
P2RY10	-0.732177	0.121473	0.147035
BDKRB1	-0.572005	0.120785	0.146288
CKAP2L	-0.744406	0.120199	0.145664
MMP9	-0.126141	0.11998	0.145484
TESPA1	-0.765571	0.119519	0.14501
SDS	-0.383093	0.117705	0.142893
FAM46C	-0.186789	0.116967	0.14208
HIST1H1B	-0.849107	0.116572	0.141683
CCR2	-0.793066	0.116549	0.141683
PAX5	-1.34194	0.112797	0.137339
ALOX15B	-0.635369	0.112011	0.136462
CD2	-0.0849548	0.111066	0.13539
CRISP3	-0.645623	0.110902	0.13527
FCGR1B	-0.555761	0.109128	0.133185
PNOC	-0.92636	0.109099	0.133185
ZEB1	-0.110475	0.107577	0.131526
CR2	-1.60037	0.106548	0.130344
TNFRSF13C	-1.72488	0.105917	0.129727
LILRB2	-0.406699	0.10547	0.129256
NR4A2	-0.0608832	0.103196	0.126618
SOSTDC1	-1.15809	0.102355	0.125662
C1orf56	-0.088354	0.100424	0.123438
LIPG	-0.698453	0.100407	0.123438
APOBR	-0.377513	0.0990141	0.12185
CD3D	-0.0871292	0.0986595	0.121486
KISS1	-1.2422	0.0961532	0.118541
TOX	-0.419816	0.0955008	0.117807
SLC2A14	-0.836947	0.0953859	0.117736
SAA4	-0.738683	0.0949788	0.117303
CST7	-0.0557869	0.0939569	0.116111
BPIFB1	-1.17939	0.0925617	0.114455
PATL2	-0.587183	0.0910463	0.112716
SERPINB4	-1.38247	0.0889265	0.11029
AFF3	-0.785633	0.0870702	0.108053
PADI2	-0.700989	0.086999	0.108029
MYBPC1	-0.942985	0.0869311	0.10801
PCDH20	-1.54267	0.0868459	0.107969
ARHGEF39	-0.725125	0.0851253	0.105958
ABCB4	-1.53158	0.0838426	0.104424
EDN2	-0.52295	0.0832228	0.103715
LYPD2	-1.28869	0.0809201	0.100906
JSRP1	-0.289235	0.0803522	0.100258
AVIL	-0.348613	0.0800929	0.0999951
NCR3	-0.592006	0.0799068	0.0998231
PDE3B	-0.476955	0.0792142	0.0991979
SELE	-1.00897	0.0784278	0.0982727
ESAM	-0.1762	0.0771885	0.0968962
AMY2B	-0.30061	0.0748598	0.0940302
FCRL1	-1.60744	0.0743707	0.0934726
IL2RA	-0.733024	0.0741796	0.0932892
SLAMF6	-0.495249	0.0737278	0.0927776
CD300LF	-0.567852	0.0728575	0.0917383
NES	-0.251509	0.0727957	0.0917164
LINC01094	-0.738654	0.0708798	0.0894116
CNR2	-1.96952	0.070545	0.0890437
SPC25	-0.583497	0.0677594	0.0855799
SH3YL1	0.0613503	0.0671252	0.0848307
RAB37	-0.628749	0.0668967	0.0845938
SH2D2A	-0.289431	0.0656314	0.0830446
HLA-G	-1.14273	0.0649123	0.0822355
SERPINB7	-0.955163	0.0600128	0.0761686
G0S2	-0.0922653	0.0599623	0.0761513
GNG2	-0.21289	0.0592129	0.075246
IGFBP1	-1.41321	0.058968	0.075027
KIF20B	-0.241777	0.0583405	0.0742744
PPY	-0.139342	0.0572133	0.0728843
ACE2	-0.317398	0.054554	0.0695395
GPR18	-1.09825	0.0529533	0.0676243
CEACAM4	-0.752095	0.0517703	0.0662364
OSCAR	-0.35107	0.0516687	0.0661475
CXCR5	-1.22286	0.0513795	0.0658181
GABRA2	-1.21013	0.0505078	0.0647415
MEF2C	-0.0991374	0.0501412	0.0643516
BIRC7	-0.816279	0.0501056	0.0643458
ADH6	-1.31044	0.0472572	0.0607257
IL23A	-0.773639	0.0466418	0.0599722
LYPD3	-0.615748	0.0463346	0.0596143
PTGER4	-0.218313	0.0460131	0.0592375
GUCA2B	-1.21444	0.0459496	0.0591927
RASGRP1	-0.348299	0.0455458	0.0587092
TNFRSF18	-0.270584	0.0446259	0.0575593
TNFRSF11B	-0.352634	0.0440971	0.0569129
DUSP2	-0.154731	0.0435675	0.0562997
CD3E	-0.150448	0.0434392	0.0561691
CALB2	-0.413367	0.0429905	0.0556237
GPA33	-0.945034	0.0424713	0.0549863
CD7	-0.104124	0.042286	0.0547809
ITGAM	-0.248202	0.0420118	0.0544597
TYMS	-0.237659	0.0404467	0.0524968
LYVE1	-1.16215	0.0402521	0.0522771
LAT	-0.162283	0.0394327	0.0512451
PRC1	-0.374281	0.0367819	0.0478605
TLR7	-1.70848	0.0364047	0.0474295
IL4I1	-0.344145	0.0362409	0.0472458
FAM129C	-1.56851	0.035801	0.0467019
SNAI3	-0.858382	0.035058	0.0457616
PLAU	-0.113029	0.0342022	0.0447009
C16orf54	-0.680011	0.0338009	0.0442045
GNLY	-0.0240144	0.0324123	0.0424153
KCNQ1OT1	-0.0553279	0.0321313	0.0420743
PDIA2	-0.536355	0.0320166	0.0419506
CPS1	-0.795505	0.0317628	0.0416446
GCSAM	-1.34147	0.0317566	0.0416446
AKR1C2	-0.499475	0.0311447	0.0408861
HLA-DQB2	-1.58069	0.0310657	0.0408084
LAIR2	-0.474061	0.0300681	0.039523
RNASE2	-0.685256	0.0300578	0.039523
PLIN2	-0.0718935	0.0299985	0.0394818
RAB33A	-0.697342	0.0298648	0.0393309
FCRL2	-1.49619	0.0294391	0.038795
CCL17	-0.981974	0.0292541	0.0385758
ARHGAP11B	-0.478695	0.0276747	0.0365165
SSUH2	-1.58174	0.0271851	0.0359394
KRT20	-1.3717	0.027098	0.0358472
FOLR2	-0.929815	0.0260718	0.0345338
IL18R1	-0.689187	0.0246193	0.0326309
GUCY2C	-1.39146	0.0244444	0.0324198
SLAMF1	-0.664714	0.0240731	0.031989
STAP1	-1.1091	0.023721	0.0315414
CLDN3	-0.0260429	0.0207227	0.027608
CLEC4E	-0.479301	0.0189557	0.0253356
TLL1	-1.33502	0.0184063	0.0246173
LY9	-0.948626	0.018219	0.0243825
PSTPIP1	-0.318904	0.0175355	0.0234983
CKB	-0.0635093	0.0172227	0.023094
MAGEA4	-1.50922	0.0171834	0.0230564
DLGAP5	-0.969157	0.0164843	0.0221471
KLRB1	-0.259929	0.016403	0.0220522
PCNA	-0.0972469	0.015447	0.0207804
CRCT1	-1.84551	0.0149145	0.0200902
SPN	-0.339542	0.0147692	0.0199076
MZB1	-0.210655	0.0144042	0.019441
DERL3	-0.197532	0.0140454	0.018994
PLK1	-0.885263	0.0138472	0.0187382
EBI3	-1.52752	0.0133096	0.0180343
FABP2	-1.46212	0.0130105	0.0176406
HEPACAM2	-1.32932	0.0125615	0.0170542
NCF2	-0.209585	0.0123349	0.0167797
HSD17B2	-0.000528094	0.0116321	0.0158445
MIR155HG	-0.452506	0.011553	0.0157575
MYO1G	-0.367663	0.0113004	0.0154233
MAFB	-0.174583	0.0107409	0.014679
OXNAD1	-0.228319	0.00999421	0.0136857
RNGTT	-0.407578	0.00971635	0.0133229
CHI3L2	-0.774846	0.00951978	0.013062
PIK3CG	-1.13138	0.00927331	0.0127493
RETN	-0.340754	0.00885522	0.0121907
WDFY4	-1.14625	0.00797246	0.0109974
GTSE1	-0.862917	0.00791284	0.0109225
CD38	-0.432245	0.00778562	0.0107613
ZBP1	-0.47012	0.00766352	0.0105996
SST	-0.0351357	0.00752864	0.01042
CENPA	-1.02771	0.00741562	0.0102774
CCNA2	-0.767874	0.00716447	0.00994932
GPR82	-0.536007	0.00676879	0.0094125
BEX5	-0.153576	0.00594579	0.00829598
SLC12A2	-0.0707804	0.00576265	0.00805134
S100B	-0.7131	0.00552852	0.00772945
ASF1B	-0.760839	0.00551059	0.0077096
PCK1	-1.05985	0.0053149	0.00744086
GPR132	-0.800296	0.00472874	0.00662922
CDK1	-0.573425	0.0046183	0.0064788
ISG15	-0.0745086	0.0045942	0.00644937
SERPINB3	-1.32965	0.00452459	0.00635597
ASPM	-0.823796	0.00449359	0.00631673
NUF2	-0.88493	0.0044348	0.00623833
C6orf15	-2.29803	0.00420546	0.00591975
MXRA5	-0.138398	0.00414709	0.00584158
HPGDS	-1.05331	0.0041273	0.00581767
CLEC2D	-0.398186	0.00398041	0.00561828
RRM2	-0.64413	0.00396491	0.00560023
KRT6A	-1.07876	0.00385054	0.00544242
MPEG1	-0.574819	0.00381198	0.0053953
ITGAX	-0.428264	0.00369289	0.00523033
FABP1	-0.803477	0.00362434	0.00513676
RUNX3	-0.442596	0.00359729	0.00510193
MYBL2	-0.952694	0.00356677	0.00506212
NCCRP1	-1.5029	0.00355612	0.00505047
VNN2	-0.347239	0.00350869	0.00498655
FCER2	-1.30598	0.00350586	0.00498595
KDM6B	-0.138996	0.00327904	0.00467303
PASK	-0.676148	0.00325701	0.00464483
TPX2	-0.666826	0.00315563	0.00450337
TNFRSF13B	-1.58139	0.00299163	0.00427227
P2RY13	-1.40323	0.00295085	0.00421696
PTGS1	-0.702213	0.00278052	0.00397906
COL9A3	-0.515266	0.00267032	0.003824
PLA1A	-0.901015	0.00233341	0.00335083
SIDT1	-1.17703	0.00221757	0.00318892
CCL23	-1.21369	0.00217251	0.00312847
AURKB	-0.684771	0.00211534	0.00304828
FCGR1A	-0.485336	0.00182059	0.00262904
HIF3A	-0.284865	0.00178918	0.00258549
DENND1C	-0.780714	0.0016847	0.00244134
GSTA1	-0.182584	0.00160325	0.00232493
ZWINT	-0.419283	0.00156887	0.00227668
PRX	-1.33143	0.00151092	0.00219568
SLAMF8	-0.733876	0.00150815	0.0021932
MMRN1	-1.32342	0.00143104	0.00208399
PILRA	-0.527107	0.00141209	0.00205785
PTGES	-0.316463	0.00141137	0.00205785
HERC5	-0.307786	0.00137308	0.00200382
CRYM	-1.38366	0.00131545	0.00192244
LGALS7B	-1.61397	0.00122623	0.00179331
RGS13	-1.21392	0.00121659	0.00178048
AURKA	-0.890591	0.0011189	0.00164216
SEMA3C	-0.197498	0.00111849	0.00164216
LRRC25	-0.819701	0.00103086	0.00151511
SNX20	-0.72988	0.00100894	0.00148394
SLC1A3	-0.473222	0.000990008	0.00145818
BMX	-1.3428	0.000943384	0.0013905
AOAH	-0.660172	0.000941409	0.00138858
SPRR1A	-1.79976	0.000898739	0.00132659
SLC2A3	-0.207043	0.000863098	0.00127489
SNX10	-0.186413	0.000844985	0.00124903
CYTL1	-1.28045	0.000804401	0.00118989
CLEC12A	-0.666326	0.000793378	0.00117443
ITGB7	-0.519398	0.000781685	0.00115878
HMMR	-1.1642	0.000777414	0.00115328
ACSL1	-0.17094	0.000727049	0.00107934
CSF3R	-0.517428	0.000655674	0.000974076
RSAD2	-0.367581	0.00058776	0.000874888
CFP	-0.80205	0.000561948	0.000837245
BCL11B	-0.646285	0.000541069	0.000807303
TMEM107	-0.186091	0.000531359	0.000793389
CDCA3	-0.957985	0.000500037	0.000747161
POU2F3	-1.48017	0.000481321	0.000719717
IGLL5	-0.190274	0.000475976	0.000712239
REP15	-1.87807	0.000475097	0.00071144
ASGR1	-0.672154	0.000462937	0.000694237
LILRB1	-1.19121	0.000454791	0.000682517
RAB3C	-1.43986	0.000441422	0.000662935
FPR3	-0.611454	0.000426199	0.00064054
TCF7	-0.366672	0.000425507	0.000639966
CENPE	-0.885406	0.000403855	0.000607843
ADRB2	-0.913083	0.000364248	0.000549834
ANLN	-1.12567	0.000362734	0.000547949
CDCA8	-1.06061	0.000332962	0.000503343
MAD2L1	-0.505073	0.00031553	0.00047769
LAMP3	-1.23511	0.000297834	0.000451562
ODAM	-0.817688	0.000286011	0.000434274
CPEB4	-0.119625	0.000269252	0.000409129
HIST1H1D	-0.481217	0.000265754	0.000404111
STAG3	-1.19708	0.000256156	0.000389802
IRS2	-0.187332	0.000244145	0.000371799
CD1E	-1.89265	0.000191798	0.000292513
DOK2	-0.454781	0.000180211	0.000275044
RTKN2	-0.853909	0.000147597	0.000225602
NFATC1	-0.434431	0.000138004	0.000211408
MCM5	-0.358112	0.000128098	0.000196379
HES6	-0.690179	0.000126884	0.000194662
AQP1	-0.217095	0.000122653	0.000188451
VMO1	-0.834575	0.000122525	0.000188395
OLR1	-0.466859	0.000113614	0.000174953
MATN2	-0.229984	0.000104483	0.000161012
HHEX	-0.158944	0.000100799	0.000155568
S100A8	-0.0674963	8.9505e-05	0.000138344
PIP	-2.191	8.85688e-05	0.000137
ENPP2	-0.535885	8.81597e-05	0.000136469
BCL2A1	-0.327299	8.37393e-05	0.000129724
PTPN7	-0.434502	7.7573e-05	0.000120352
PIM2	-0.37028	7.53187e-05	0.000116942
PSTPIP2	-0.638632	7.37829e-05	0.000114644
COL13A1	-1.11961	7.33725e-05	0.000114092
NPW	-1.0915	6.99552e-05	0.00010886
ITPRIP	-0.385406	6.89127e-05	0.000107319
CEACAM7	-0.810173	6.14127e-05	9.57112e-05
HES1	-0.139854	5.69173e-05	8.88392e-05
CYTH4	-0.554444	5.58063e-05	8.7171e-05
UBD	-0.161307	5.15875e-05	8.07643e-05
CREB5	-0.316187	5.10532e-05	7.99885e-05
GM2A	-0.277706	4.84545e-05	7.60324e-05
FCGR2A	-0.371695	4.66334e-05	7.32304e-05
S1PR4	-0.650227	4.45557e-05	7.01057e-05
HSPA6	-0.619234	4.42096e-05	6.9636e-05
RGS2	-0.214837	4.41959e-05	6.9636e-05
DOCK2	-0.608404	4.24104e-05	6.69041e-05
RGS18	-1.2197	3.56177e-05	5.62743e-05
ITPKA	-1.65329	3.21032e-05	5.07604e-05
AIM2	-1.34882	3.17982e-05	5.03166e-05
DPYSL3	-0.259719	3.09229e-05	4.89692e-05
TNFSF13B	-0.283892	3.05077e-05	4.83487e-05
MADCAM1	-1.69026	3.01066e-05	4.77497e-05
CCNB1	-0.788533	2.92121e-05	4.63667e-05
DNASE1L3	-2.15517	2.8205e-05	4.4837e-05
HIST1H2BJ	-1.01854	2.77377e-05	4.41621e-05
NMB	-0.253903	2.56599e-05	4.09172e-05
TAGAP	-0.677555	2.56333e-05	4.09063e-05
CDC20	-1.11255	2.53009e-05	4.04383e-05
PDE4B	-0.620129	2.35742e-05	3.77662e-05
P2RX5	-1.10054	2.34592e-05	3.76113e-05
TLR10	-2.03542	2.33871e-05	3.75248e-05
NUSAP1	-0.678241	2.23821e-05	3.59401e-05
C11orf53	-2.07541	2.18242e-05	3.50715e-05
SP140	-0.750516	1.88589e-05	3.033e-05
CCK	-1.75445	1.77236e-05	2.85263e-05
SPRR1B	-1.81001	1.4401e-05	2.32328e-05
ATF3	-0.164456	1.386e-05	2.23776e-05
NTS	-0.691188	1.26967e-05	2.05315e-05
CXorf21	-1.53059	1.20864e-05	1.95599e-05
EREG	-0.617888	1.18732e-05	1.9245e-05
TOP2A	-0.749226	1.11548e-05	1.80947e-05
HEY1	-0.713375	9.81687e-06	1.59495e-05
NFATC2	-0.396246	9.39185e-06	1.5271e-05
BIN2	-0.492091	9.18642e-06	1.49487e-05
HCK	-0.651155	9.00884e-06	1.46713e-05
MSR1	-0.469397	8.14257e-06	1.32815e-05
SIT1	-0.614834	7.59661e-06	1.24008e-05
QRSL1	-0.52482	7.37538e-06	1.20492e-05
KLHL6	-0.879069	6.94446e-06	1.13542e-05
SPIB	-1.00143	6.87681e-06	1.12525e-05
UPK3B	-1.71926	6.36061e-06	1.04243e-05
RBP5	-0.830764	5.76186e-06	9.45807e-06
HMOX1	-0.398492	5.5795e-06	9.166e-06
BAG3	-0.214487	5.05684e-06	8.32061e-06
GK	-0.3944	4.93134e-06	8.12058e-06
TCL1A	-1.00672	4.90848e-06	8.08939e-06
CLEC5A	-0.786137	4.90493e-06	8.08939e-06
SOCS1	-0.342296	4.68563e-06	7.73447e-06
SNCA	-0.947899	4.23217e-06	6.99155e-06
VEGFC	-1.13882	4.08269e-06	6.75001e-06
CCNB2	-1.12832	4.0697e-06	6.73393e-06
LILRB4	-0.717052	4.0628e-06	6.72789e-06
ARHGAP9	-0.619448	3.7525e-06	6.22402e-06
SASH3	-0.682596	3.72339e-06	6.18071e-06
FCER1A	-1.83057	3.55753e-06	5.91014e-06
SEMA3G	-1.73799	3.44508e-06	5.73254e-06
TBC1D10C	-0.430956	3.41159e-06	5.6814e-06
LIF	-0.525416	3.40937e-06	5.6814e-06
CD300A	-0.716285	3.30757e-06	5.51708e-06
MUC16	-1.22362	3.06263e-06	5.11263e-06
P2RY8	-1.27546	2.66109e-06	4.45313e-06
F13A1	-0.807484	2.56824e-06	4.30123e-06
GPR65	-0.69549	2.56763e-06	4.30123e-06
MMP3	-1.15807	2.53897e-06	4.25911e-06
CTSV	-1.54075	2.47314e-06	4.15206e-06
VWA5A	-0.281158	2.45014e-06	4.1168e-06
SLC11A1	-0.251188	2.19118e-06	3.69069e-06
ACVRL1	-0.449953	1.92348e-06	3.24509e-06
RASAL3	-0.603364	1.91476e-06	3.23302e-06
CLEC3B	-1.24091	1.54744e-06	2.61923e-06
CD180	-1.61266	1.42978e-06	2.42604e-06
BTG2	-0.152054	1.20913e-06	2.05503e-06
HMGB2	-0.189306	1.16046e-06	1.97392e-06
LAIR1	-0.454152	1.12004e-06	1.90675e-06
ITGB2-AS1	-0.871387	9.93931e-07	1.69345e-06
BIRC5	-0.885255	9.88439e-07	1.68549e-06
CPNE5	-1.55858	9.35059e-07	1.59578e-06
NUAK1	-0.456376	9.17635e-07	1.56734e-06
PTPN22	-0.715901	8.41007e-07	1.43884e-06
HEG1	-0.431849	7.54552e-07	1.29307e-06
ASB9	-1.28819	6.80289e-07	1.16677e-06
SUCNR1	-1.69026	6.44997e-07	1.10716e-06
AKNA	-0.386423	6.43379e-07	1.10531e-06
POU2AF1	-1.00022	6.37278e-07	1.09574e-06
PADI1	-1.4799	6.28254e-07	1.08112e-06
NKX2-3	-0.965749	6.22698e-07	1.07245e-06
LRRC26	-1.91973	5.63004e-07	9.71264e-07
OLFM1	-0.662814	5.23261e-07	9.04212e-07
GADD45A	-0.190138	5.0663e-07	8.76207e-07
SLA	-0.360038	5.04224e-07	8.72776e-07
FAM83A	-1.72374	3.7913e-07	6.5735e-07
C3AR1	-0.704624	3.61199e-07	6.27314e-07
MSMB	-1.30395	3.47357e-07	6.03781e-07
BCAT1	-0.439397	3.24487e-07	5.64504e-07
MT1H	-0.641621	3.17515e-07	5.5284e-07
LMNB1	-0.604575	3.08799e-07	5.38118e-07
SELP	-1.52607	2.83565e-07	4.9498e-07
FGFBP1	-2.11208	2.79735e-07	4.88709e-07
LCP2	-0.40895	2.63422e-07	4.60598e-07
NEIL1	-0.466802	2.27385e-07	3.97924e-07
BLK	-1.57182	2.09073e-07	3.66188e-07
IL10RA	-0.648421	1.9412e-07	3.40288e-07
MAP4K1	-0.948393	1.87056e-07	3.28183e-07
NOV	-0.773571	1.81992e-07	3.1957e-07
TREM2	-0.530924	1.77117e-07	3.11274e-07
FZD4	-0.625013	1.69351e-07	2.98132e-07
FPR1	-0.638126	1.55193e-07	2.7391e-07
SKAP1	-0.552199	1.52718e-07	2.69772e-07
RASSF5	-0.35399	1.40163e-07	2.48018e-07
KCNN3	-1.39008	1.28777e-07	2.28065e-07
GPR34	-1.09174	1.24188e-07	2.20317e-07
TLR2	-0.601412	1.23346e-07	2.1901e-07
CCR7	-1.06383	1.22023e-07	2.16848e-07
PRDM1	-0.354454	1.13368e-07	2.01815e-07
MKI67	-0.979726	1.13063e-07	2.01446e-07
ANKRD44	-0.570052	1.10306e-07	1.96872e-07
DMBT1	-0.950406	1.03971e-07	1.85887e-07
C16orf74	-1.23319	1.00948e-07	1.80639e-07
GPIHBP1	-1.94843	9.68611e-08	1.73476e-07
IL7R	-0.480437	9.58319e-08	1.71782e-07
CD69	-0.364428	8.91831e-08	1.60142e-07
ATF5	-0.326305	8.6736e-08	1.55883e-07
DMKN	-0.229417	8.41314e-08	1.51334e-07
TUBB2A	-0.310337	8.27455e-08	1.48971e-07
PCDH17	-0.576441	8.20998e-08	1.47937e-07
LY6K	-1.3911	8.07554e-08	1.45642e-07
SIGLEC10	-1.22112	7.87381e-08	1.42128e-07
KIAA1324	-0.951756	7.59564e-08	1.37467e-07
CCR6	-1.45827	6.2138e-08	1.12755e-07
RHOJ	-0.687244	6.20677e-08	1.12726e-07
ALPL	-1.83599	5.91336e-08	1.07587e-07
CENPW	-0.507249	5.66723e-08	1.032e-07
FAM177B	-1.70556	5.52641e-08	1.00724e-07
CD72	-1.234	5.0614e-08	9.24119e-08
CLEC4A	-0.954859	4.45055e-08	8.13309e-08
IGF2	-0.589905	4.43619e-08	8.11402e-08
CDCA7	-0.489985	4.08534e-08	7.48557e-08
TM4SF18	-0.488531	3.64759e-08	6.6894e-08
ACP5	-0.32363	2.78214e-08	5.11586e-08
APOC1	-0.191545	2.12649e-08	3.91722e-08
SULT1E1	-1.39519	2.01166e-08	3.709e-08
HLA-DOB	-1.17457	1.96433e-08	3.62498e-08
TMEM156	-1.06646	1.31374e-08	2.42871e-08
GATA2	-1.42789	1.30588e-08	2.41635e-08
RHOV	-0.402891	1.27527e-08	2.36182e-08
MAP3K8	-0.361953	1.24391e-08	2.30581e-08
CTNNAL1	-0.314598	1.16321e-08	2.15816e-08
FMNL1	-0.529257	1.05887e-08	1.96634e-08
TMEM37	-0.290788	1.05239e-08	1.95606e-08
SUSD3	-0.814546	1.05011e-08	1.95358e-08
PRCP	-0.319219	1.04187e-08	1.94e-08
UBE2C	-0.786153	1.00428e-08	1.8717e-08
LCK	-0.45167	9.64779e-09	1.7997e-08
NCKAP1L	-0.796883	9.0342e-09	1.68677e-08
QPCT	-0.449798	7.92008e-09	1.48277e-08
STC2	-1.11666	7.56261e-09	1.41842e-08
SPOCK2	-0.552739	6.34605e-09	1.1935e-08
CD1D	-1.25404	6.25921e-09	1.17824e-08
IL16	-0.75214	5.94235e-09	1.11961e-08
ADAMTS6	-0.723643	5.76576e-09	1.08733e-08
PLEK	-0.721098	5.4899e-09	1.03626e-08
ID2	-0.194863	5.06706e-09	9.57317e-09
MYO1F	-0.422889	4.56913e-09	8.64035e-09
PRKCB	-0.930938	4.49299e-09	8.50415e-09
FGD2	-0.910366	4.17722e-09	7.91373e-09
HMGCS2	-2.15081	3.4001e-09	6.45332e-09
GJB2	-0.380148	3.36947e-09	6.40106e-09
MS4A4A	-0.660247	3.04574e-09	5.79139e-09
LYAR	-0.304152	2.83023e-09	5.38657e-09
RNF186	-1.58803	2.36232e-09	4.50017e-09
CD22	-1.65208	2.04231e-09	3.89776e-09
DOCK8	-0.479683	1.90613e-09	3.64459e-09
HRASLS2	-1.325	1.79888e-09	3.44591e-09
HAVCR2	-0.644691	1.64935e-09	3.16241e-09
CXCL2	-0.240287	1.61723e-09	3.1037e-09
CENPF	-1.00702	1.57964e-09	3.03438e-09
CENPM	-0.832627	1.4695e-09	2.82544e-09
IKZF1	-0.694706	1.43972e-09	2.77075e-09
CEBPA	-1.10679	1.20826e-09	2.33402e-09
SAA2	-0.96228	1.08886e-09	2.1073e-09
ARHGAP25	-0.937856	9.54321e-10	1.85388e-09
TNXB	-0.713154	9.18226e-10	1.78544e-09
GATA3	-0.804933	8.89256e-10	1.73074e-09
CDKN3	-0.955995	8.52978e-10	1.6617e-09
CLEC10A	-1.52675	7.83133e-10	1.52707e-09
CA12	-0.692409	5.15745e-10	1.00758e-09
FCRLA	-1.69574	5.13113e-10	1.00434e-09
FABP5	-0.247456	4.83052e-10	9.48196e-10
CD1C	-1.8975	3.89767e-10	7.66542e-10
SEMA7A	-1.29396	3.82634e-10	7.53231e-10
CD83	-0.805987	3.7435e-10	7.37627e-10
CD84	-0.692181	3.35882e-10	6.62461e-10
SCIMP	-1.27664	2.53376e-10	5.00212e-10
SNRK	-0.358535	2.53373e-10	5.00212e-10
FCGR3A	-0.532615	2.45004e-10	4.8461e-10
DLL1	-0.988153	2.31978e-10	4.59727e-10
DHRS9	-1.66291	2.29708e-10	4.55665e-10
CLECL1	-1.48051	2.28578e-10	4.53859e-10
HVCN1	-0.874395	2.19498e-10	4.3667e-10
IFI30	-0.680076	1.82603e-10	3.63621e-10
SPRR3	-1.81633	1.31416e-10	2.61944e-10
VSIG4	-0.737396	1.15839e-10	2.31342e-10
IL1R2	-1.15946	1.12571e-10	2.25251e-10
KRT6B	-1.49403	1.10906e-10	2.22134e-10
RFTN1	-0.564932	9.26074e-11	1.85845e-10
DKK1	-1.3929	7.15032e-11	1.44193e-10
BTK	-1.2313	6.74706e-11	1.36194e-10
SCGB2A1	-1.01859	6.16255e-11	1.24639e-10
SLC7A11	-1.22117	5.74046e-11	1.16216e-10
LIMS2	-0.58548	5.34854e-11	1.08388e-10
TRAF3IP3	-0.632991	4.50241e-11	9.13309e-11
CD19	-1.53642	3.82397e-11	7.76451e-11
CD163	-0.552358	3.81339e-11	7.75064e-11
APBB1IP	-0.702685	3.72035e-11	7.56898e-11
CYB561A3	-0.512023	3.42032e-11	6.96544e-11
RNF39	-1.47156	2.76966e-11	5.65154e-11
SOX9	-0.225478	2.60653e-11	5.32393e-11
FGR	-0.64987	2.25987e-11	4.62959e-11
CNTNAP3B	-1.56125	2.17223e-11	4.45448e-11
SNX29P2	-1.06014	1.79791e-11	3.69053e-11
SCEL	-1.95334	1.72596e-11	3.54637e-11
MUC17	-1.9432	1.3924e-11	2.86957e-11
F8	-1.16846	1.19303e-11	2.46114e-11
ACY3	-0.930122	1.15474e-11	2.38453e-11
OASL	-0.651696	1.10274e-11	2.27943e-11
PHACTR1	-1.09878	1.04014e-11	2.15219e-11
ANXA4	-0.0833958	9.36611e-12	1.94187e-11
IGSF6	-0.870662	8.40517e-12	1.74439e-11
SLC15A3	-0.615281	8.23292e-12	1.71036e-11
CTSD	-0.126334	6.72226e-12	1.39934e-11
TMC8	-0.832198	6.56401e-12	1.36778e-11
LEPR	-0.706214	5.63438e-12	1.17525e-11
GJA1	-0.41566	5.44512e-12	1.13807e-11
PARVG	-0.676838	3.89205e-12	8.15121e-12
TK1	-0.805194	3.30003e-12	6.95364e-12
ALDOB	-1.23133	3.15629e-12	6.66435e-12
PRAP1	-1.3251	2.98914e-12	6.31788e-12
KRT13	-1.58005	2.94232e-12	6.2253e-12
SLCO2B1	-0.832421	2.81091e-12	5.95335e-12
ENG	-0.40581	2.6133e-12	5.54051e-12
C2CD4B	-1.19742	2.42916e-12	5.15541e-12
FCGBP	-0.784652	2.36549e-12	5.02544e-12
ITGA10	-1.12099	2.05397e-12	4.36812e-12
ARRB2	-0.429273	1.70954e-12	3.63938e-12
LIPA	-0.274611	1.52081e-12	3.2443e-12
S100A2	-0.496502	1.24949e-12	2.66826e-12
ARHGAP30	-0.749431	6.38137e-13	1.36981e-12
PROM1	-0.408299	6.14028e-13	1.31942e-12
CXCL1	-0.392705	4.1023e-13	8.83343e-13
CD27	-0.780094	3.77218e-13	8.13106e-13
FCN3	-1.95127	3.2314e-13	6.97266e-13
BCAS4	-0.836684	3.18531e-13	6.8804e-13
TMTC1	-0.870913	2.76606e-13	5.98106e-13
UPK1B	-0.980021	2.66872e-13	5.77662e-13
ATOH8	-1.52857	2.09216e-13	4.53337e-13
FAM105A	-0.767193	1.84454e-13	4.00946e-13
S100A9	-0.257619	1.74706e-13	3.80156e-13
OGFRL1	-0.578437	1.34272e-13	2.93099e-13
GAPT	-1.66564	1.15406e-13	2.52183e-13
DUSP5	-0.544669	1.07838e-13	2.36145e-13
TM4SF20	-1.86294	9.00101e-14	1.97525e-13
CMC1	-0.254675	7.71693e-14	1.69707e-13
PLD4	-1.73501	6.38353e-14	1.40533e-13
CP	-0.852286	5.14264e-14	1.13457e-13
ZC3HAV1	-0.373959	4.57304e-14	1.01106e-13
CELF2	-0.506899	4.446e-14	9.85086e-14
TNFRSF25	-0.921141	3.83457e-14	8.53274e-14
C1QC	-0.727857	3.59771e-14	8.01433e-14
F3	-0.384055	2.96692e-14	6.62345e-14
KPNA2	-0.551422	2.85438e-14	6.37912e-14
HLA-DOA	-1.11412	2.11286e-14	4.72703e-14
HMCES	-0.389145	1.68233e-14	3.76792e-14
MX2	-0.47438	1.32282e-14	2.96592e-14
TNS4	-1.67029	1.0438e-14	2.34287e-14
SH2D3C	-0.940933	8.81421e-15	1.98227e-14
NCF4	-0.835622	8.72572e-15	1.96495e-14
PCDH12	-2.07604	7.98349e-15	1.79977e-14
SELPLG	-0.703009	4.81287e-15	1.08737e-14
ANKRD28	-0.359228	4.80029e-15	1.08572e-14
CPVL	-0.81816	4.77824e-15	1.08191e-14
ENTPD1	-0.45297	3.6379e-15	8.26048e-15
SLC26A2	-0.664239	3.12409e-15	7.11273e-15
LPAR5	-1.59607	2.65942e-15	6.07488e-15
ICAM1	-0.454229	2.41465e-15	5.52186e-15
PTGS2	-0.913013	2.33054e-15	5.33543e-15
IGFBP3	-0.372794	1.97444e-15	4.52522e-15
FAM43A	-0.977346	1.92003e-15	4.40541e-15
UBE2S	-0.568432	1.53962e-15	3.5444e-15
SPINK4	-1.78469	1.44229e-15	3.32402e-15
APLNR	-1.20957	1.37578e-15	3.17428e-15
ACOT7	-0.662063	1.32243e-15	3.05461e-15
CNTRL	-0.677027	9.23191e-16	2.13482e-15
C1QB	-0.590695	7.80073e-16	1.80995e-15
CD86	-1.02095	3.17087e-16	7.39871e-16
PREX2	-1.3673	3.15882e-16	7.37891e-16
BDKRB2	-1.31443	2.91538e-16	6.81795e-16
PDGFB	-0.934531	2.65289e-16	6.21113e-16
RAPGEF4	-1.62625	2.3982e-16	5.62759e-16
STEAP1	-0.467149	2.07717e-16	4.87981e-16
SNHG12	-0.568443	1.70129e-16	4.00133e-16
EAF2	-1.1253	1.41557e-16	3.33312e-16
TMEM176B	-0.285785	1.12064e-16	2.64169e-16
SAMSN1	-0.610171	9.92371e-17	2.34736e-16
C6orf222	-1.50824	9.76777e-17	2.31312e-16
DEF6	-0.711618	9.03439e-17	2.14191e-16
CSF1R	-0.914835	8.56207e-17	2.03226e-16
ACAP1	-0.620937	7.16098e-17	1.70166e-16
HIST2H2BE	-0.583368	6.39116e-17	1.52223e-16
BLNK	-0.750561	6.35206e-17	1.51466e-16
LPXN	-0.676239	5.87357e-17	1.40219e-16
CLEC7A	-0.766798	5.86307e-17	1.4013e-16
RASA4	-0.927724	3.86118e-17	9.26056e-17
MS4A7	-0.780582	3.85031e-17	9.24522e-17
RND1	-1.51492	3.60516e-17	8.66665e-17
ANKRD37	-0.545334	2.7447e-17	6.62127e-17
CD14	-0.495821	9.78867e-18	2.37528e-17
ITGA5	-0.475144	8.81018e-18	2.14036e-17
MNDA	-0.815962	7.59144e-18	1.84862e-17
AIF1L	-1.48495	6.48164e-18	1.58023e-17
THEMIS2	-0.835982	5.08535e-18	1.24128e-17
WAS	-0.762984	3.44828e-18	8.44686e-18
RHOH	-0.792493	3.09753e-18	7.6057e-18
VSIG1	-1.66231	1.91361e-18	4.7099e-18
PTTG1	-0.72138	1.43784e-18	3.54312e-18
KLK7	-1.94325	1.4169e-18	3.49569e-18
HMGB3	-0.583516	1.2906e-18	3.18791e-18
FGL2	-0.745039	1.24991e-18	3.09109e-18
LTC4S	-0.896991	1.02038e-18	2.52648e-18
GGA2	-0.622151	8.97157e-19	2.22404e-18
MUC5B	-0.916856	7.57533e-19	1.88018e-18
TNFRSF4	-0.899713	6.95206e-19	1.72756e-18
SLC14A1	-2.02189	5.46312e-19	1.36084e-18
CYBB	-0.860911	3.26956e-19	8.18381e-19
DENND2D	-0.569578	2.38287e-19	5.98616e-19
PLAT	-0.465401	2.3475e-19	5.90449e-19
NOS3	-1.89931	1.65534e-19	4.18394e-19
GRB7	-0.620042	1.32579e-19	3.3592e-19
DLL4	-2.45314	1.25103e-19	3.17369e-19
TGFBR3	-0.782167	1.05139e-19	2.67379e-19
SOCS3	-0.378853	9.47984e-20	2.41677e-19
C1QA	-0.585846	9.44102e-20	2.40985e-19
TNNC2	-1.74743	5.47077e-20	1.39989e-19
ANPEP	-0.622502	4.7401e-20	1.21443e-19
RGS1	-0.452397	3.49499e-20	8.9654e-20
OLFM4	-0.443167	3.44269e-20	8.84224e-20
CSF2RA	-1.36827	2.11088e-20	5.44192e-20
UGT2B7	-2.13001	1.57693e-20	4.07555e-20
VPREB3	-1.49006	1.27083e-20	3.29268e-20
ORAI2	-0.711492	1.21025e-20	3.13967e-20
KRT16	-1.4363	9.52975e-21	2.47845e-20
TSPAN18	-2.06253	5.89502e-21	1.53508e-20
HCST	-0.383232	5.391e-21	1.40738e-20
UNC5B-AS1	-1.57544	4.50478e-21	1.17752e-20
C10orf128	-1.10813	3.6024e-21	9.42834e-21
LY6D	-1.14682	2.0751e-21	5.44483e-21
RCAN1	-0.548313	1.71339e-21	4.51294e-21
SELL	-0.942847	1.33743e-21	3.52718e-21
PGC	-0.805449	6.37496e-22	1.68557e-21
INPP5D	-1.21036	6.02958e-22	1.59629e-21
POU2F2	-1.30148	4.95279e-22	1.3129e-21
IL33	-1.34137	3.69052e-22	9.83346e-22
LINC00342	-0.990076	2.84344e-22	7.58617e-22
IFI6	-0.227368	2.11529e-22	5.65082e-22
MUC20	-1.04315	1.51534e-22	4.05333e-22
FCGR2B	-1.09926	1.16771e-22	3.12753e-22
KLK6	-1.47093	9.24729e-23	2.48641e-22
GIMAP8	-1.86578	6.04162e-23	1.62871e-22
MUC4	-1.66489	5.15206e-23	1.39072e-22
DYSF	-1.69686	4.9268e-23	1.33166e-22
STC1	-1.09863	4.34119e-23	1.17491e-22
RIN2	-0.502665	4.09601e-23	1.11001e-22
LGALS2	-0.715898	3.98859e-23	1.08232e-22
SERPINB9	-0.773771	3.48778e-23	9.47668e-23
RGS19	-0.741	7.11818e-24	1.94689e-23
CX3CL1	-0.762329	4.68324e-24	1.28261e-23
ARL15	-1.22719	3.95134e-24	1.0836e-23
SPTSSB	-1.52426	3.25771e-24	8.95761e-24
FCER1G	-0.461694	1.82098e-24	5.01375e-24
CDH17	-1.75958	1.6352e-24	4.50827e-24
TBXAS1	-0.930476	1.24776e-24	3.45392e-24
EVI2A	-0.754509	1.18993e-24	3.29825e-24
P2RY6	-2.03639	1.08761e-24	3.01869e-24
LRMP	-1.49982	1.07749e-24	2.99464e-24
SHANK3	-2.02296	4.36181e-25	1.21883e-24
LDB2	-0.938133	1.79529e-25	5.0439e-25
RDX	-0.435259	1.5308e-25	4.31256e-25
MMP7	-0.357782	1.24911e-25	3.52379e-25
NR1D1	-0.997571	7.78925e-26	2.2034e-25
KRT23	-1.12598	6.41232e-26	1.81888e-25
LAT2	-1.22752	3.91194e-26	1.1127e-25
BCL6B	-2.20587	3.89469e-26	1.10931e-25
CCL15	-1.98404	3.73044e-26	1.064e-25
AQP5	-1.01172	2.9679e-26	8.48852e-26
INHBB	-1.7637	2.82525e-26	8.10297e-26
LIFR	-1.09848	2.39008e-26	6.86443e-26
GRB10	-0.749563	2.28402e-26	6.56896e-26
CYTIP	-0.638976	1.81948e-26	5.2402e-26
COL15A1	-0.776339	1.53925e-26	4.43931e-26
ATP10B	-1.95952	1.43636e-26	4.14836e-26
CD79A	-1.15262	1.01154e-26	2.92963e-26
CCL14	-2.35263	8.1474e-27	2.36297e-26
MTUS1	-0.447134	4.11781e-27	1.20273e-26
KRT15	-1.69748	3.52441e-27	1.03087e-26
KLK8	-1.98564	2.55276e-27	7.47722e-27
SERPINA1	-0.419863	1.52139e-27	4.4626e-27
LINC00926	-1.54481	1.07482e-27	3.15719e-27
KLK1	-1.09186	9.35471e-28	2.75178e-27
MS4A6A	-0.945366	3.66032e-28	1.07825e-27
C12orf75	-0.380865	3.25248e-28	9.59481e-28
SHE	-2.31721	2.30102e-28	6.81723e-28
SIPA1L2	-0.993027	1.30315e-28	3.87754e-28
JAG2	-1.43052	7.51893e-29	2.24373e-28
PALMD	-1.12728	5.96137e-29	1.78409e-28
EHF	-0.732108	5.14341e-29	1.54153e-28
MX1	-0.478107	3.86977e-29	1.16149e-28
PLCG2	-1.32481	3.1221e-29	9.38446e-29
NCOA7	-0.432534	1.71046e-29	5.15635e-29
HLA-DRB5	-1.09405	1.50285e-29	4.53712e-29
MS4A1	-1.46128	1.18762e-29	3.59594e-29
NRP2	-0.825913	1.08006e-29	3.27506e-29
BATF	-0.814389	7.43748e-30	2.25859e-29
ANXA13	-1.84152	6.40958e-30	1.9493e-29
ITGB8	-0.736986	4.09156e-30	1.24618e-29
DCK	-0.697612	3.22261e-30	9.84421e-30
CST6	-1.3378	2.06297e-30	6.31115e-30
TYROBP	-0.521632	9.98445e-31	3.06358e-30
SAA1	-0.844797	4.88509e-31	1.50115e-30
CD200	-1.32242	4.08608e-31	1.25937e-30
LMTK3	-1.41142	4.05221e-31	1.25079e-30
ADM5	-2.00025	1.54002e-31	4.76783e-31
ZNF385D	-1.64125	1.299e-31	4.02769e-31
CRABP2	-0.873405	8.36077e-32	2.59624e-31
LIMCH1	-0.848955	4.33634e-32	1.35061e-31
PTPRM	-0.932805	4.14948e-32	1.29436e-31
KANK3	-1.91802	3.5809e-32	1.12039e-31
FAM107A	-1.4589	3.23439e-32	1.01351e-31
TNFRSF1B	-0.670459	3.07609e-32	9.65368e-32
NMU	-2.23305	2.01515e-32	6.3531e-32
SPINK5	-2.0391	1.91814e-32	6.05652e-32
CCL20	-0.74522	1.78506e-32	5.64494e-32
CASKIN2	-1.23208	1.70256e-32	5.39231e-32
TMEM154	-1.37505	1.63248e-32	5.1783e-32
GPR183	-0.789403	1.0599e-32	3.3724e-32
STAB1	-1.02173	1.02675e-32	3.27197e-32
SPI1	-0.909925	8.01564e-33	2.55831e-32
EPHA4	-1.69093	7.08416e-33	2.26452e-32
FBXO2	-1.05202	5.61448e-33	1.7975e-32
HECW2	-2.26192	3.94974e-33	1.26846e-32
HSPA1A	-0.402873	1.70907e-33	5.49726e-33
C1orf162	-0.800851	1.35549e-33	4.37358e-33
PIK3IP1	-0.588343	9.67184e-34	3.12556e-33
GPR146	-2.17737	6.4181e-34	2.07733e-33
TM4SF4	-0.706766	5.13747e-34	1.66806e-33
CD48	-0.865418	4.01396e-34	1.30533e-33
ARHGEF15	-2.10686	3.47245e-34	1.13101e-33
MARCH1	-1.53556	3.37097e-34	1.09969e-33
GBP4	-0.868648	1.68105e-34	5.51887e-34
CDKN2A	-1.04482	7.86551e-35	2.59461e-34
HSD11B2	-1.21959	5.04949e-35	1.66835e-34
AREG	-1.60959	3.97598e-35	1.31577e-34
PLK2	-0.861356	3.95606e-35	1.31128e-34
FAM110D	-2.40314	2.73761e-35	9.10333e-35
MACROD2	-1.24185	1.97028e-35	6.57289e-35
PREX1	-1.23287	1.53398e-35	5.13399e-35
TEK	-1.91708	9.90907e-36	3.32179e-35
GFOD1	-1.40809	8.88339e-36	2.98766e-35
PTPRE	-0.718763	6.33901e-36	2.13541e-35
SLC6A6	-0.69628	5.96751e-36	2.01355e-35
BANK1	-1.82588	5.48673e-36	1.85435e-35
CYSLTR1	-1.94492	4.21141e-36	1.42801e-35
HLA-DQA2	-1.38583	3.73374e-36	1.26812e-35
INSIG1	-0.686872	2.92479e-36	9.95006e-36
SOX4	-0.465098	2.09743e-36	7.17083e-36
NCF1	-0.904291	1.96639e-36	6.73399e-36
AIF1	-0.742879	1.70848e-36	5.86048e-36
TNNT1	-1.46054	1.23209e-36	4.23338e-36
GDF15	-0.964996	8.52044e-37	2.93735e-36
LST1	-0.788591	3.40611e-37	1.18212e-36
MS4A8	-1.85236	2.11532e-37	7.36616e-37
GABRP	-1.14989	2.03816e-37	7.10947e-37
LIMD2	-0.708486	1.56187e-37	5.45728e-37
ZFAND2A	-0.753971	1.2574e-37	4.40836e-37
CXCL3	-0.716759	1.21006e-37	4.24962e-37
SOX7	-2.12707	6.84308e-38	2.41555e-37
TRNP1	-1.03594	2.15947e-38	7.66203e-38
FBP1	-0.612601	6.94039e-39	2.46677e-38
F2RL3	-1.73414	5.49474e-39	1.95632e-38
ROBO4	-2.05357	2.64652e-39	9.43879e-39
LCP1	-0.732939	2.38365e-39	8.51597e-39
SLC6A14	-1.93852	1.69679e-39	6.08312e-39
PHACTR3	-1.62812	7.61748e-40	2.75002e-39
CTSZ	-0.432437	7.43998e-40	2.69064e-39
SERPINB5	-1.94427	5.40337e-40	1.95754e-39
NRN1	-2.24696	5.14797e-40	1.86829e-39
TXNRD1	-0.730085	4.65315e-40	1.69168e-39
CDHR5	-1.70758	4.0241e-40	1.46557e-39
DUOXA2	-1.32253	3.11619e-40	1.13692e-39
TFRC	-0.695102	2.89873e-40	1.05945e-39
KCTD12	-0.675014	2.22489e-40	8.16055e-40
PIGR	-0.570338	2.04312e-40	7.5072e-40
CCDC69	-1.18854	1.67318e-40	6.15885e-40
PMAIP1	-0.967012	1.15017e-40	4.24885e-40
RASIP1	-1.96619	1.11484e-40	4.12572e-40
TSPAN7	-1.55827	2.51168e-41	9.32844e-41
HMGCS1	-0.842036	1.77976e-41	6.63394e-41
PTPRCAP	-0.711432	1.14487e-41	4.27515e-41
MMP1	-1.18718	1.06325e-41	3.97756e-41
HSPA1B	-0.573037	9.59788e-42	3.59703e-41
LYL1	-1.52321	6.07275e-42	2.28004e-41
KCNE3	-1.38416	5.47667e-42	2.05999e-41
CLIC2	-1.24404	5.12686e-42	1.93193e-41
SOX17	-1.95035	3.2081e-42	1.2111e-41
FERMT3	-0.936749	2.55093e-42	9.66546e-42
EVI2B	-0.912569	1.13127e-42	4.30214e-42
ERG	-1.91224	9.51823e-43	3.62641e-42
RPGR	-1.04237	9.11657e-43	3.4798e-42
ADM	-0.676556	8.34619e-43	3.19164e-42
PLCB1	-1.57442	5.48372e-43	2.10481e-42
ST6GAL1	-0.872022	4.47213e-43	1.71973e-42
SQLE	-0.924237	2.50747e-43	9.66032e-43
CES2	-0.812489	2.36162e-43	9.1154e-43
SLC38A1	-0.740049	7.24247e-44	2.80069e-43
ANKRD36C	-0.796343	6.32657e-44	2.4511e-43
SLC40A1	-0.583998	3.20289e-44	1.24792e-43
LY86	-1.33191	2.78843e-44	1.08849e-43
EDN1	-0.950855	6.26337e-45	2.4496e-44
ALOX5AP	-0.703738	5.69846e-45	2.23289e-44
DNAJB1	-0.515101	4.57609e-45	1.79993e-44
AP1S2	-0.680395	2.0208e-45	7.97888e-45
FAM3D	-1.61467	1.56848e-45	6.20481e-45
IL1RN	-1.12755	1.14906e-45	4.56307e-45
KRT17	-1.1709	9.66332e-46	3.84485e-45
CD320	-0.77356	7.84227e-46	3.12631e-45
DAPP1	-1.62078	7.1558e-46	2.85817e-45
KYNU	-1.25959	4.03625e-46	1.62157e-45
PKIB	-1.62369	8.03031e-47	3.25149e-46
PSCA	-1.12632	3.3184e-47	1.35158e-46
AKR1B10	-2.21592	2.61278e-47	1.07051e-46
HIST2H2AA3	-0.755399	2.28829e-47	9.39429e-47
KDR	-2.33322	9.40846e-48	3.87022e-47
PTPRC	-0.775965	7.09326e-48	2.92367e-47
ONECUT2	-0.864263	6.28855e-48	2.59717e-47
IER5	-0.955045	5.3959e-48	2.23745e-47
ITGB2	-0.68549	1.58032e-48	6.57936e-48
MIA	-1.23639	1.31751e-48	5.49628e-48
GCHFR	-0.663049	5.94912e-49	2.49187e-48
TMPRSS2	-1.17389	3.30206e-49	1.38592e-48
TNFAIP2	-0.710342	1.55363e-49	6.53409e-49
IFI44L	-0.622522	1.26388e-49	5.33726e-49
IRF8	-1.42463	8.72695e-50	3.70044e-49
CPLX1	-1.75032	7.94736e-50	3.38377e-49
ALOX5	-1.25	5.14101e-50	2.19343e-49
CD52	-0.631843	2.67194e-50	1.14235e-49
CXCL17	-1.5179	1.76003e-50	7.57178e-50
AQP3	-1.08831	1.66768e-50	7.18946e-50
TRIM31	-1.88762	1.35234e-50	5.85446e-50
CCL28	-1.19393	9.57334e-51	4.15314e-50
RNASE6	-1.20467	4.43949e-51	1.93408e-50
GIMAP6	-1.68008	1.99718e-51	8.7562e-51
NEDD9	-0.735991	1.99127e-51	8.74887e-51
FLI1	-1.39931	8.28862e-52	3.65727e-51
RAI14	-0.874589	7.34204e-52	3.24654e-51
HK2	-1.26549	6.8201e-52	3.02221e-51
TCN1	-1.4728	4.95209e-52	2.19915e-51
IL3RA	-1.88597	4.28038e-52	1.90495e-51
MYCT1	-2.33288	8.70113e-53	3.90605e-52
PRKCH	-1.1471	5.78358e-53	2.60198e-52
ADCY4	-1.3676	4.63434e-53	2.0895e-52
HSPH1	-0.678038	1.60824e-53	7.31501e-53
LMO2	-1.6734	6.07096e-55	2.7859e-54
CD79B	-1.31016	6.38494e-56	2.96957e-55
FAM198B	-0.897543	3.25769e-56	1.52197e-55
SIPA1L3	-1.12923	1.64464e-56	7.70107e-56
CEACAM1	-1.45339	6.8208e-57	3.20842e-56
ITM2A	-0.879326	3.29758e-57	1.55468e-56
RGS10	-0.728892	2.8234e-57	1.33417e-56
BTNL9	-2.04474	2.57221e-57	1.21826e-56
CA9	-1.65914	2.37213e-57	1.12608e-56
HERPUD1	-0.447587	1.4002e-57	6.66226e-57
EPS8L1	-0.917565	1.03133e-57	4.92983e-57
RGCC	-0.707638	4.40623e-58	2.11602e-57
DUSP4	-1.02479	2.32367e-58	1.1185e-57
MUC5AC	-1.43647	1.27417e-58	6.16195e-58
RBP7	-1.60405	3.19901e-59	1.55069e-58
MCF2L	-1.37694	2.20952e-59	1.07356e-58
RASGRP3	-1.64359	1.64761e-59	8.02434e-59
HPGD	-1.5005	3.58317e-60	1.75337e-59
NOTCH4	-1.5809	2.54218e-60	1.24694e-59
MCTP1	-1.93142	1.03883e-60	5.13201e-60
LSP1	-0.777471	2.42845e-61	1.20258e-60
GIMAP1	-1.4449	3.66674e-62	1.82453e-61
CXorf36	-2.16292	2.43645e-62	1.21528e-61
CLDN5	-1.49747	4.74752e-63	2.39113e-62
AOC1	-2.11528	2.94118e-63	1.48497e-62
SORD	-1.29811	1.7431e-63	8.8223e-63
PRSS22	-1.14287	1.58696e-63	8.05179e-63
SPRY1	-0.946792	6.91558e-64	3.51741e-63
CLDN15	-1.22279	6.17079e-64	3.14634e-63
CD34	-1.82074	3.12928e-64	1.5995e-63
NOSTRIN	-1.04789	1.02482e-64	5.27745e-64
EMB	-1.16291	3.60512e-65	1.86581e-64
STARD10	-0.759324	3.43116e-65	1.78024e-64
ATP1B1	-0.608934	1.36016e-65	7.07491e-65
TRIB1	-0.938102	8.88213e-66	4.65523e-65
FLT1	-2.17222	5.17951e-67	2.74954e-66
VNN1	-1.25594	4.2237e-67	2.24792e-66
FSCN1	-1.08941	3.39746e-68	1.81755e-67
PIK3R3	-1.79728	5.00153e-69	2.68264e-68
DPCR1	-1.88304	3.53462e-69	1.90574e-68
THBD	-1.28522	2.57915e-69	1.39423e-68
MMRN2	-1.89388	6.67782e-70	3.62887e-69
COL17A1	-1.80793	6.2298e-70	3.39433e-69
THSD7A	-2.20274	5.023e-70	2.74404e-69
SLC6A8	-1.40334	2.71657e-70	1.49194e-69
CLDN23	-1.52453	1.14114e-70	6.2839e-70
TRIM29	-1.68137	4.62698e-71	2.55474e-70
SCD	-1.20444	2.37886e-71	1.31699e-70
TIE1	-1.93409	1.46113e-71	8.11083e-71
CXCL5	-2.07138	4.36408e-72	2.42906e-71
FAM167B	-2.15774	2.04326e-72	1.14345e-71
LTB	-1.01649	2.51814e-73	1.42075e-72
SOX18	-2.37885	1.42162e-73	8.04285e-73
EMP1	-0.668327	1.0042e-73	5.69693e-73
RASSF6	-1.55189	5.86435e-74	3.33606e-73
CKS2	-0.865326	3.46296e-74	1.98089e-73
MXD1	-1.20935	6.03185e-75	3.48901e-74
SULT1C2	-1.51326	4.8331e-75	2.80347e-74
REG4	-1.95539	2.48636e-75	1.45038e-74
DUOX2	-1.27166	9.40965e-76	5.50451e-75
GIMAP5	-1.30935	4.46872e-76	2.62156e-75
HIST1H2BD	-1.25353	3.78149e-76	2.22472e-75
PLVAP	-1.20293	2.16434e-76	1.27696e-75
JAM2	-1.78418	1.70018e-76	1.00598e-75
PDE4C	-1.5682	5.49382e-77	3.26938e-76
ARL14	-1.69667	4.79764e-78	2.87163e-77
VWF	-1.40313	3.8421e-78	2.30638e-77
KLK10	-1.84359	2.96596e-78	1.78563e-77
CSTA	-1.03229	2.59364e-78	1.56604e-77
LAMA3	-1.24085	1.07106e-78	6.48602e-78
TMEM88	-1.9963	8.67518e-79	5.2689e-78
PI3	-1.3022	6.25348e-79	3.80927e-78
CD37	-0.996627	2.46046e-79	1.50767e-78
STMN1	-0.699715	4.04436e-80	2.49302e-79
CEACAM5	-2.2468	1.26326e-80	7.83374e-80
EGLN3	-1.36424	5.51722e-81	3.43165e-80
CD68	-0.808719	1.49215e-81	9.30901e-81
CALCRL	-1.81858	1.23419e-81	7.72302e-81
CYYR1	-2.23528	8.98449e-82	5.6392e-81
PHGR1	-1.52922	6.20769e-82	3.92015e-81
HBEGF	-1.45516	3.36521e-82	2.1382e-81
SUPT5H	-0.830661	2.24506e-82	1.43088e-81
CORO1A	-0.870305	1.23982e-82	7.951e-82
SDR16C5	-1.88594	4.73749e-83	3.05716e-82
PLAUR	-0.692475	2.42106e-83	1.56724e-82
SYT8	-1.1023	4.50577e-85	2.92592e-84
CD53	-0.977382	2.17869e-85	1.42373e-84
ELMO1	-1.72147	1.31963e-85	8.65088e-85
TSPAN8	-0.793094	2.75401e-86	1.82863e-85
CDH5	-2.03885	2.67017e-86	1.77868e-85
KRT18	-0.698933	7.97775e-87	5.34872e-86
TMEM45B	-1.97235	6.06106e-87	4.0769e-86
SHROOM3	-1.14987	2.68741e-87	1.81918e-86
TRIM54	-1.61312	1.54206e-87	1.04749e-86
ICAM2	-1.20499	1.21337e-88	8.37995e-88
MACC1	-1.58894	1.17887e-88	8.16899e-88
AKR7A3	-1.60585	9.05862e-89	6.29834e-88
SLC2A1	-1.20344	1.39185e-89	9.71003e-89
TM4SF5	-2.10749	7.07756e-90	4.95429e-89
SRGN	-0.68071	3.97514e-90	2.80159e-89
S1PR1	-1.92334	9.26034e-91	6.54884e-90
GPSM3	-0.940968	5.27207e-91	3.74118e-90
RAMP3	-1.83366	1.2735e-91	9.06817e-91
SDC4	-0.81818	8.89758e-95	6.4243e-94
EGFL7	-1.24209	3.47382e-95	2.51699e-94
CDA	-1.71731	3.00592e-96	2.18564e-95
GMFG	-0.775158	1.58802e-96	1.15875e-95
RAMP2	-1.56207	1.79662e-97	1.325e-96
AZGP1	-1.54643	9.75984e-99	7.24966e-98
DOCK9	-1.48956	6.67972e-99	4.97965e-98
ECSCR	-2.11541	1.18457e-99	8.92751e-99
RAC2	-1.03584	5.20627e-102	3.98183e-101
SMIM14	-0.789713	4.09176e-102	3.14107e-101
BCAS1	-2.07715	2.92418e-103	2.27008e-102
CLEC14A	-2.19513	2.38721e-103	1.86022e-102
ABCG1	-1.57438	4.04575e-104	3.16457e-103
PNP	-1.40022	2.91994e-104	2.3014e-103
PLA2G10	-2.15258	2.38718e-104	1.88871e-103
WFDC2	-0.916628	1.32489e-104	1.05227e-103
SLCO2A1	-1.8264	1.82555e-105	1.47257e-104
EMCN	-2.26892	5.68684e-106	4.62335e-105
CXCR4	-0.846924	5.0205e-106	4.09776e-105
PTPRB	-2.12416	5.2966e-107	4.35756e-106
AHNAK2	-1.49618	3.51077e-107	2.89989e-106
VWA1	-1.01671	2.62554e-107	2.17741e-106
KLK11	-1.98875	2.59813e-107	2.16336e-106
HS3ST1	-1.54879	4.86468e-108	4.06703e-107
MUC13	-1.70111	6.03551e-109	5.06639e-108
HSPG2	-0.829893	4.89092e-109	4.12234e-108
ITGA2	-1.32344	1.63334e-111	1.388e-110
SGK1	-0.909816	1.53143e-111	1.30677e-110
SWAP70	-1.07515	5.00913e-113	4.29205e-112
EPCAM	-0.890072	3.06303e-115	2.65763e-114
PRSS3	-1.19522	1.17294e-115	1.02199e-114
HIST1H1C	-0.960436	2.77507e-118	2.45945e-117
LAMC2	-1.42405	1.8588e-118	1.65449e-117
ZG16B	-1.63934	1.78534e-119	1.59599e-118
HYAL2	-1.16529	1.46732e-121	1.32315e-120
UCP2	-1.1681	9.40762e-122	8.52049e-121
CYP3A5	-1.12728	1.29549e-122	1.1785e-121
TGFBR2	-0.960849	7.4141e-123	6.77439e-122
CLIC3	-1.36779	6.53669e-123	5.99923e-122
IL2RG	-1.13524	1.54345e-124	1.44218e-123
GIMAP7	-1.57148	1.24124e-124	1.16507e-123
CD93	-1.59833	7.17301e-125	6.76359e-124
AMN	-1.81856	1.04375e-128	1.01667e-127
GIMAP4	-1.39518	6.58794e-129	6.47814e-128
AGR3	-1.42505	1.17543e-129	1.16137e-128
LDLR	-1.3595	5.79189e-130	5.75012e-129
KRT8	-0.832278	2.96152e-131	2.96871e-130
ANXA10	-1.89774	1.08706e-131	1.10038e-130
TGM2	-1.01282	1.05802e-131	1.07626e-130
SFTA2	-1.42241	2.23873e-132	2.29999e-131
SSR4	-0.341839	2.54502e-134	2.62773e-133
APOL1	-1.04366	9.23313e-136	9.58111e-135
LMO7	-1.0917	3.60998e-136	3.76495e-135
SEC14L1	-1.24445	1.15366e-141	1.24729e-140
BIRC3	-1.055	5.16985e-143	5.61881e-142
EFNB2	-1.84669	4.33759e-144	4.73922e-143
LAPTM5	-1.04542	1.60134e-148	1.77783e-147
MGST1	-1.25972	6.09989e-150	6.8458e-149
TACSTD2	-1.02921	2.0083e-153	2.30397e-152
AKR1C3	-1.29725	1.51511e-153	1.74788e-152
CLDN18	-1.84848	6.68836e-154	7.75925e-153
EHD4	-1.45434	1.13348e-154	1.3224e-153
S100A14	-1.29951	2.42552e-155	2.84585e-154
IL18	-1.61519	2.65951e-156	3.13822e-155
KLF4	-1.29216	1.00759e-156	1.19579e-155
VSIG2	-1.80433	1.50984e-157	1.83401e-156
[truncated: 66 more rows]

## Sheet: 6. scAB Differential Genes
Gene	logfoldchanges	pvals	pvals_adj
COL1A1	3.40502	0	0
RARRES2	2.43887	0	0
COL1A2	3.10189	0	0
COL3A1	2.98979	0	0
COL5A2	3.00913	0	0
COL6A3	3.00964	0	0
COL5A1	3.13686	0	0
LUM	2.88499	0	0
CTHRC1	3.16094	0	0
MXRA5	2.84371	0	0
THBS2	3.30946	0	0
SFRP2	2.95446	0	0
DCN	2.55114	0	0
VCAN	2.54899	0	0
COL12A1	2.99456	0	0
COL10A1	3.57667	0	0
MMP14	1.80881	0	0
CTSK	2.62096	0	0
AEBP1	2.3508	0	0
FN1	2.31456	0	0
FBLN1	2.29145	0	0
POSTN	2.88431	0	0
MMP11	2.88608	0	0
ISLR	2.79327	0	0
MFAP2	2.76319	0	0
MEG3	2.42404	0	0
COL8A1	3.21208	0	0
CCDC80	2.33262	0	0
SDC1	1.83676	0	0
INHBA	2.93086	0	0
MMP2	2.0378	0	0
FSTL1	1.81342	0	0
COL11A1	3.77409	0	0
SULF1	2.71871	0	0
CDH11	2.74136	0	0
THY1	2.03902	0	0
PALLD	1.81472	0	0
C1S	1.71361	0	0
ANTXR1	2.41869	0	0
COL6A1	1.76147	0	0
SERPINH1	1.56036	0	0
PCOLCE	1.88132	0	0
COL6A2	1.78671	0	0
CTGF	1.75623	4.38025e-308	1.84596e-306
LOXL1	2.53068	5.95713e-305	2.46029e-303
MXRA8	2.09828	7.0437e-304	2.85201e-302
FBN1	2.158	1.44819e-303	5.75097e-302
TPM2	1.535	4.36258e-290	1.69976e-288
SPARC	1.49623	5.7387e-289	2.19452e-287
EMILIN1	2.22121	2.79841e-284	1.05068e-282
SPON2	1.83912	2.34637e-278	8.65224e-277
ASPN	2.05248	2.67599e-272	9.69458e-271
MFAP5	3.17497	8.07194e-269	2.87389e-267
BGN	1.72444	5.79869e-266	2.02954e-264
GJB2	2.65009	7.79726e-262	2.68356e-260
MRC2	2.58515	1.88658e-258	6.38654e-257
SERPINF1	1.62112	5.89211e-257	1.9313e-255
PTK7	2.02166	6.01927e-253	1.94215e-251
FAP	2.20838	1.60278e-249	5.09192e-248
CERCAM	2.28304	5.13446e-248	1.60647e-246
FNDC1	3.60168	1.18631e-245	3.65632e-244
NNMT	1.38427	2.02689e-241	6.15519e-240
FBLN2	2.28764	2.43336e-241	7.28244e-240
CLEC11A	1.70493	8.98212e-237	2.64972e-235
HTRA1	1.58641	1.56035e-236	4.53821e-235
CYR61	1.58331	1.64622e-230	4.72144e-229
PRRX1	2.21733	3.23549e-230	9.15245e-229
C1R	1.42061	3.39143e-230	9.46393e-229
GAS1	2.94824	5.19253e-230	1.42968e-228
NTM	3.22436	4.30748e-228	1.17039e-226
SFRP4	2.04357	9.83938e-228	2.63874e-226
C1QTNF3	2.93544	3.68133e-224	9.74608e-223
APOD	1.37885	2.69406e-210	6.8682e-209
LOX	2.50861	5.98714e-205	1.50774e-203
TMEM45A	1.66852	9.57929e-201	2.38328e-199
GREM1	3.05088	2.02173e-196	4.9701e-195
IGFBP3	1.54662	7.36839e-191	1.79009e-189
C3	1.3201	4.31866e-187	1.02506e-185
CXCL14	2.14129	3.12208e-182	7.32624e-181
OLFML3	1.83745	1.38857e-180	3.22179e-179
HTRA3	2.29212	9.41983e-180	2.16133e-178
DPYSL3	1.63697	7.96639e-177	1.80776e-175
PDLIM3	1.56496	6.49242e-175	1.45727e-173
TAGLN	1.26127	8.409e-175	1.86716e-173
FIBIN	2.3881	1.08174e-172	2.37637e-171
COL16A1	1.7319	2.172e-172	4.67207e-171
ADAM12	3.23202	3.49691e-172	7.44445e-171
NREP	1.53649	4.79521e-163	1.00021e-161
COMP	2.32486	1.87812e-161	3.83992e-160
PDGFRA	2.16491	1.58935e-159	3.21765e-158
NUPR1	1.10919	2.16264e-159	4.33577e-158
PDPN	2.40726	6.76311e-153	1.33008e-151
PDGFRL	2.38511	8.33257e-153	1.62328e-151
PLAU	1.48936	5.87331e-148	1.13349e-146
BICC1	1.38635	1.94788e-147	3.72443e-146
SOX4	1.07361	4.85456e-146	9.19693e-145
KCNQ1OT1	1.15081	5.23914e-145	9.8353e-144
FZD1	2.20337	7.73704e-144	1.43937e-142
CALD1	1.16072	1.15612e-143	2.13159e-142
OLFM4	1.66702	1.86365e-140	3.37583e-139
FBXO32	1.26506	2.00607e-139	3.6022e-138
IGFBP5	1.2968	3.38011e-139	6.01719e-138
PLAT	1.15312	7.317e-139	1.29142e-137
MYL9	1.02314	4.02411e-135	6.98301e-134
DDR2	1.65695	9.57787e-135	1.64819e-133
ITGBL1	2.30597	1.07419e-134	1.83323e-133
STEAP1	1.39668	1.52129e-132	2.55404e-131
RUNX2	2.13282	2.03613e-130	3.36368e-129
THBS1	1.1641	1.30875e-128	2.1449e-127
EFEMP1	1.544	1.32402e-126	2.15283e-125
ADAMTS2	2.48627	2.2189e-126	3.57971e-125
TNFAIP6	2.19078	1.73425e-124	2.77615e-123
MATN3	2.43051	2.15961e-123	3.43046e-122
ACTA2	1.00333	1.55495e-122	2.45112e-121
PRSS3	1.48022	8.92616e-121	1.3964e-119
GEM	1.42137	2.1044e-120	3.26736e-119
F3	1.13827	9.05344e-120	1.39518e-118
SSPN	1.41851	9.61437e-120	1.47064e-118
RAMP1	1.01794	3.36983e-117	5.11669e-116
CRABP2	1.28519	3.90527e-116	5.88641e-115
FKBP11	0.901848	1.24647e-115	1.86519e-114
OMD	2.54461	3.54367e-115	5.26451e-114
TMEM158	2.19512	1.12081e-114	1.6532e-113
SDC2	1.02156	7.75943e-113	1.1364e-111
PMEPA1	0.943912	8.68679e-111	1.25442e-109
MFAP4	1.19967	1.02902e-110	1.47564e-109
EDIL3	1.61229	1.25743e-110	1.79076e-109
FGFR1	1.279	1.09754e-109	1.55235e-108
FGF7	1.84672	1.69545e-107	2.34974e-106
PRSS23	0.933646	8.75525e-107	1.19732e-105
COL8A2	2.76422	1.41618e-105	1.92395e-104
PXDN	1.41895	1.74483e-105	2.35495e-104
MMP23B	1.81468	4.73356e-103	6.34727e-102
GPX2	1.09811	1.68963e-101	2.22235e-100
LMO7	0.870096	4.13178e-99	5.26674e-98
GJA1	1.11486	3.68303e-97	4.63748e-96
IGFL2	2.98568	6.55691e-96	8.20607e-95
MEST	1.37463	8.36149e-96	1.04015e-94
LOXL2	1.71174	2.88439e-95	3.56663e-94
PRELP	1.37747	6.22434e-95	7.65075e-94
ERRFI1	0.851505	1.82629e-94	2.2184e-93
CD248	1.53101	2.2439e-92	2.69399e-91
SEMA3C	1.40285	3.14368e-92	3.75243e-91
ENC1	1.15773	3.16964e-92	3.76167e-91
RARRES1	1.24397	1.54913e-91	1.82798e-90
SPOCK1	2.33153	1.32657e-90	1.55645e-89
ITGA11	3.57848	2.35931e-90	2.75253e-89
LRRC17	2.59967	3.04868e-90	3.53681e-89
LRRC15	4.07093	3.77416e-89	4.35399e-88
DKK3	1.09014	8.21382e-89	9.42308e-88
SUGCT	2.24357	4.68987e-88	5.3506e-87
ECM1	1.10293	2.82287e-87	3.18537e-86
CD55	0.803779	3.02917e-87	3.39959e-86
TMEM119	2.10351	3.63632e-87	4.05892e-86
HOPX	0.948374	1.83723e-86	2.03972e-85
FMOD	1.56115	4.28057e-86	4.72694e-85
CYP1B1	1.6116	5.79172e-86	6.36165e-85
LGALS1	0.652567	6.32685e-86	6.91267e-85
EDNRA	1.53729	1.12994e-84	1.22807e-83
DIO2	2.97089	1.95695e-84	2.11576e-83
ALDH1A1	0.838641	4.35001e-83	4.65429e-82
GATM	1.01764	7.58446e-83	8.07315e-82
ELN	1.35514	1.011e-82	1.06516e-81
TWIST1	2.67144	8.98233e-82	9.41549e-81
KRT7	0.849695	1.95792e-81	2.04198e-80
KRT8	0.869573	8.73986e-81	9.06926e-80
IGFBP6	0.829391	6.1549e-80	6.35494e-79
NEXN	0.992507	8.76108e-80	9.00081e-79
UNC5B	1.50715	4.55557e-79	4.63412e-78
ATP1B1	0.809917	7.04263e-79	7.12894e-78
KRT18	0.86567	2.35985e-78	2.37712e-77
LTBP2	1.6593	2.52306e-78	2.52918e-77
SNAI2	1.24768	5.76288e-78	5.74896e-77
PDGFRB	0.726887	4.74334e-76	4.6866e-75
C5orf46	1.92541	1.52649e-74	1.48688e-73
BCAT1	1.2389	4.03002e-74	3.90704e-73
OLFML2B	1.43326	5.56268e-72	5.34276e-71
SLC40A1	0.800546	1.30953e-71	1.25193e-70
SGIP1	1.747	1.34984e-70	1.27864e-69
STARD10	0.80968	7.02554e-70	6.56459e-69
PODN	1.64583	9.39171e-70	8.6968e-69
PTGDS	0.930268	9.45116e-70	8.71278e-69
LAMP5	2.16757	2.05259e-69	1.88382e-68
AZGP1	1.01393	2.67899e-69	2.44784e-68
MMP7	0.829236	8.42162e-68	7.56115e-67
PDZK1IP1	0.792916	5.36461e-67	4.77497e-66
CLDN10	0.765791	3.68566e-65	3.26647e-64
GSTA1	1.72286	4.32016e-65	3.81245e-64
LTBP1	0.868112	5.16755e-65	4.54085e-64
SDC4	0.752671	1.06114e-64	9.28501e-64
PMP22	0.768361	2.91583e-64	2.51932e-63
TMC5	0.894564	2.21813e-63	1.90059e-62
CPE	0.672977	6.24926e-63	5.31058e-62
BASP1	0.886266	8.30369e-63	7.02751e-62
RIN2	0.851807	1.19175e-62	1.00448e-61
ANGPTL2	1.28336	1.32164e-61	1.10048e-60
PIGR	0.827299	4.50858e-61	3.73904e-60
ECM2	1.29131	2.76265e-60	2.28195e-59
LMCD1	0.748054	2.80196e-60	2.3052e-59
TACSTD2	0.703206	2.94132e-60	2.41025e-59
TGFB3	1.41641	1.27372e-59	1.03962e-58
RBP1	0.677899	1.51516e-59	1.23181e-58
NDN	0.845572	3.76141e-59	3.0341e-58
CRISPLD2	0.716811	5.24032e-59	4.17809e-58
LCN2	0.771473	5.82638e-59	4.62749e-58
ANXA4	0.715458	7.18154e-59	5.68195e-58
MUC1	0.699301	7.56287e-59	5.96081e-58
DPT	1.76452	1.96601e-58	1.54365e-57
SERPINE1	0.806977	7.47376e-56	5.7587e-55
ITM2C	0.602224	2.02654e-55	1.55099e-54
ADRA2A	1.05111	2.90211e-55	2.21138e-54
NID2	1.66289	4.76721e-55	3.61922e-54
GPRC5A	0.757972	8.73906e-54	6.46816e-53
MOXD1	1.67909	1.73374e-53	1.27863e-52
LXN	0.821556	4.56142e-53	3.35208e-52
CST1	1.83219	7.42783e-53	5.43917e-52
CLU	0.617359	1.94137e-52	1.41658e-51
FAM198B	0.622342	4.60007e-51	3.32138e-50
NR2F1	1.45939	4.64761e-50	3.3324e-49
VCAM1	0.947966	6.29008e-50	4.49447e-49
REG1A	1.15099	7.28241e-50	5.18558e-49
IGF2	1.29369	8.53969e-50	6.05996e-49
PLTP	0.76103	1.22496e-49	8.6628e-49
FILIP1L	0.621851	2.05402e-49	1.44763e-48
ZCCHC24	1.26557	2.34692e-49	1.64843e-48
COLEC12	2.0516	4.47205e-49	3.11986e-48
CTSE	0.833155	5.39989e-49	3.75447e-48
SERPINE2	1.11428	7.5716e-49	5.24676e-48
ELF3	0.632159	1.1561e-48	7.95784e-48
ANXA10	1.02352	3.27631e-48	2.23286e-47
KLK1	1.4446	4.35253e-48	2.95657e-47
DMKN	0.661495	1.78964e-47	1.19599e-46
MGST1	0.634088	4.69071e-47	3.12462e-46
TCN1	1.21917	1.56457e-46	1.03221e-45
TSPAN8	0.62976	2.90358e-46	1.89743e-45
SYT8	0.699581	4.18697e-46	2.7189e-45
SOX9	0.691855	1.59811e-45	1.03128e-44
IRS2	0.698793	3.48073e-45	2.23221e-44
SCG5	0.885052	4.5617e-45	2.90738e-44
C12orf75	0.618308	5.27835e-45	3.35378e-44
CILP	2.77426	8.88203e-45	5.60899e-44
GPNMB	0.498007	1.66238e-44	1.04341e-43
TUBB2A	0.836824	1.72856e-44	1.08166e-43
RGS16	1.14914	1.84564e-44	1.15144e-43
TMEM176B	0.592386	5.74027e-44	3.57038e-43
SERPINA4	1.16319	8.47689e-44	5.24095e-43
PHLDB1	0.681528	2.54986e-43	1.57178e-42
CFH	0.518637	5.5647e-43	3.40982e-42
EPCAM	0.612425	7.44667e-43	4.54952e-42
ENPP1	2.14287	2.59885e-42	1.57842e-41
KLF5	0.66306	3.85317e-42	2.32655e-41
AHNAK2	0.751545	5.8353e-42	3.51309e-41
SEMA5A	1.28651	9.05544e-42	5.42014e-41
MFGE8	0.474513	4.51525e-40	2.664e-39
CFB	0.684065	1.46348e-39	8.56115e-39
CXCL17	1.0347	1.52088e-39	8.8718e-39
GP2	1.28575	2.12817e-39	1.23446e-38
REG3A	1.17057	3.02071e-39	1.74727e-38
SLIT2	1.77571	3.16101e-39	1.82332e-38
IGF1	1.82953	4.99794e-39	2.87486e-38
GCNT3	0.849847	5.8554e-39	3.35872e-38
CXCL2	0.72606	5.49895e-38	3.13683e-37
CP	1.13197	6.12255e-38	3.48294e-37
FBLN5	0.757664	6.855e-38	3.88889e-37
MSRB3	0.704658	8.82656e-38	4.99366e-37
ALDH1A3	1.38747	9.4551e-38	5.33464e-37
FSCN1	0.581117	3.07347e-37	1.71998e-36
CXCL12	0.667457	3.91667e-37	2.18593e-36
TRNP1	0.967101	4.04126e-37	2.24938e-36
TIMP3	0.556276	6.45643e-37	3.56485e-36
LSAMP	1.87544	1.31458e-36	7.20057e-36
GGT5	0.616828	2.82689e-36	1.52815e-35
DUOX2	0.818371	3.04591e-36	1.64225e-35
SRPX	0.78766	6.22676e-36	3.34851e-35
SLPI	0.524779	7.51915e-36	4.02255e-35
APCDD1	1.24463	9.48395e-36	5.04751e-35
SMOC2	0.624189	1.34801e-35	7.13756e-35
FAM46A	0.631383	1.70894e-35	9.02546e-35
WNT5A	2.00218	1.92519e-35	1.01416e-34
TSPAN1	0.632678	2.6459e-35	1.38675e-34
JUP	0.555316	2.70041e-35	1.41173e-34
SHISA2	2.04949	5.60168e-35	2.91372e-34
CYP3A5	0.605817	5.8837e-35	3.05273e-34
ISM1	2.69029	9.99118e-35	5.17087e-34
MMP19	1.14021	1.06401e-34	5.49294e-34
GAS7	1.49119	2.74523e-34	1.40667e-33
LAMA2	1.76057	3.31081e-34	1.69228e-33
ONECUT2	0.783612	5.86357e-34	2.98233e-33
F13A1	1.46688	7.85905e-34	3.98746e-33
AKR7A3	0.78797	8.92874e-34	4.51908e-33
SERPINA1	0.643162	2.90672e-33	1.46399e-32
RAI14	0.521369	6.65721e-33	3.33668e-32
SVEP1	1.92357	1.27852e-32	6.39262e-32
CLDN4	0.496345	2.17198e-32	1.07816e-31
PLA2G10	0.952042	2.35111e-32	1.16428e-31
CLDN2	1.78054	2.42524e-32	1.19811e-31
LGALS2	0.839637	3.03883e-32	1.49054e-31
OGN	1.57421	4.2206e-32	2.0653e-31
SLC6A6	0.59272	5.11029e-32	2.49474e-31
APOL1	0.471648	1.11312e-31	5.37054e-31
TRIM54	0.915173	1.73266e-31	8.30149e-31
LGALS4	0.605076	2.82308e-31	1.34634e-30
LIPH	0.646054	4.073e-31	1.93796e-30
XBP1	0.488366	4.34149e-31	2.06096e-30
MMP1	0.994749	4.5923e-31	2.17502e-30
FAM3B	0.649974	5.0654e-31	2.3936e-30
MT1E	0.627518	5.93314e-31	2.79725e-30
UCHL1	1.23039	7.46227e-31	3.51016e-30
MAL2	0.491573	8.7968e-31	4.1285e-30
NID1	0.586229	3.58852e-30	1.67654e-29
TUBA1A	0.48288	1.16474e-29	5.4171e-29
NUAK1	0.780949	1.89605e-29	8.75916e-29
ANPEP	0.623032	2.34807e-29	1.0799e-28
PPP1R1B	0.708506	4.96137e-29	2.26164e-28
SHROOM3	0.611093	7.09951e-29	3.22209e-28
SFN	0.586972	1.08652e-28	4.89882e-28
RUNX1T1	0.900447	1.15308e-28	5.1876e-28
HSPG2	0.372791	1.94783e-28	8.72511e-28
DPEP1	1.39916	2.48415e-28	1.11034e-27
AKR1C3	0.49382	4.8127e-28	2.14649e-27
CPA2	1.52822	4.96399e-28	2.20919e-27
REG3G	2.09892	7.29355e-28	3.23201e-27
SQLE	0.629114	1.21214e-27	5.33703e-27
CCL11	2.31994	1.53627e-27	6.72118e-27
ITGA2	0.596549	1.56268e-27	6.80787e-27
BOC	1.189	2.07554e-27	9.02313e-27
PNLIPRP1	1.6869	2.39429e-27	1.03652e-26
CEL	1.59401	2.56893e-27	1.1098e-26
CADM1	0.657288	2.82267e-27	1.21434e-26
NQO1	0.502407	5.33526e-27	2.28575e-26
FSTL3	0.53272	9.5412e-27	4.06239e-26
CELA3B	1.49861	1.84592e-26	7.82715e-26
CDKN2A	0.708309	2.67266e-26	1.12864e-25
OSR2	1.79795	2.89817e-26	1.22137e-25
WFDC2	0.438325	3.67001e-26	1.5435e-25
VSNL1	2.23986	4.16017e-26	1.74254e-25
CLDN3	0.466226	4.48405e-26	1.8744e-25
MAF	0.642919	7.51916e-26	3.13678e-25
AGR2	0.522592	9.45404e-26	3.93601e-25
TMPRSS4	0.681664	9.86815e-26	4.10015e-25
LGMN	0.390127	1.24663e-25	5.16926e-25
AXL	0.433303	2.9607e-25	1.22033e-24
CAPN8	0.612479	3.51056e-25	1.44408e-24
PLA2G1B	1.16216	4.33978e-25	1.78164e-24
CITED4	0.500134	6.21919e-25	2.54309e-24
HSPA1A	0.425604	9.34484e-25	3.81366e-24
SCT	3.39918	1.13968e-24	4.64188e-24
ERP27	1.1917	1.62743e-24	6.58951e-24
CEACAM6	0.650896	1.89324e-24	7.65077e-24
HAND2	1.15351	4.15632e-24	1.67633e-23
LSR	0.448198	5.23973e-24	2.10507e-23
CRYAB	0.296143	5.63567e-24	2.25974e-23
FST	1.97228	6.16714e-24	2.46805e-23
SFTA2	0.519401	9.62546e-24	3.83718e-23
HMGCS1	0.555726	1.06381e-23	4.2327e-23
PTPRS	0.809687	1.22954e-23	4.88268e-23
CPA1	1.0053	2.51023e-23	9.94937e-23
MLLT11	0.937431	4.74411e-23	1.87315e-22
PTGIS	1.23225	6.26815e-23	2.46079e-22
ANO1	0.726817	6.6388e-23	2.60135e-22
PAPPA	2.03391	7.64702e-23	2.98508e-22
ANKRD28	0.384876	7.81006e-23	3.04298e-22
MT1G	0.549535	8.80861e-23	3.42557e-22
HOMER2	0.609973	1.28666e-22	4.9849e-22
MIAT	1.28598	4.83348e-22	1.86215e-21
CCDC71L	0.728033	5.19998e-22	1.99962e-21
TM4SF5	0.835014	5.82483e-22	2.23574e-21
HMGB3	0.501667	9.00716e-22	3.43804e-21
EPYC	3.61151	1.74595e-21	6.63974e-21
LAMC2	0.483747	1.84144e-21	6.99003e-21
CUZD1	2.06627	1.91022e-21	7.2378e-21
TMPRSS2	0.600935	2.20755e-21	8.34907e-21
NRP2	0.518082	2.88909e-21	1.08868e-20
VNN1	0.650506	3.86295e-21	1.453e-20
SIPA1L3	0.579449	3.92966e-21	1.47541e-20
LAMA3	0.632169	4.85284e-21	1.81542e-20
CHN1	0.5262	7.73539e-21	2.86265e-20
REG4	0.927579	9.3551e-21	3.45587e-20
AKAP12	0.339009	1.00238e-20	3.68968e-20
CLIC3	0.389845	1.02713e-20	3.77407e-20
C19orf33	0.396756	2.22948e-20	8.13404e-20
F2R	0.489185	3.55854e-20	1.28919e-19
CELA3A	1.12426	5.29507e-20	1.91494e-19
CXCL6	0.873133	6.2021e-20	2.23514e-19
GSTA2	3.28329	8.8827e-20	3.19005e-19
MYLK	0.303216	1.70347e-19	6.10705e-19
HIC1	0.878535	1.85259e-19	6.6249e-19
GRP	3.05774	1.88786e-19	6.73303e-19
CKB	0.349456	1.91976e-19	6.83502e-19
LAMB3	0.379983	2.33744e-19	8.30777e-19
SH3YL1	0.298444	2.48529e-19	8.81808e-19
MEDAG	1.33515	3.10988e-19	1.09964e-18
PDIA2	1.95624	3.58042e-19	1.26386e-18
RBMS3	0.520428	5.32832e-19	1.86491e-18
CLPS	0.928442	8.49591e-19	2.96352e-18
SLC12A2	0.388725	9.49693e-19	3.30154e-18
DERL3	0.724305	1.05917e-18	3.66363e-18
CTRC	0.894602	1.15843e-18	4.00025e-18
TGFBI	0.343618	1.27844e-18	4.40731e-18
FXYD3	0.399349	1.30827e-18	4.50263e-18
RND3	0.335608	2.07297e-18	7.09899e-18
IGFBP2	0.364906	2.30346e-18	7.87524e-18
VSIG2	0.565385	2.30897e-18	7.88102e-18
SLC19A2	0.810027	2.95669e-18	1.00421e-17
SYCN	0.974259	3.61364e-18	1.22531e-17
ALB	2.34181	5.02038e-18	1.69397e-17
TUSC3	0.319755	5.60132e-18	1.88691e-17
AQP5	0.825116	6.0273e-18	2.0271e-17
SLC4A4	0.299619	6.43073e-18	2.15926e-17
ATF3	0.375922	8.59215e-18	2.87565e-17
FOSB	0.33885	9.59396e-18	3.20057e-17
TCF21	0.653748	9.74864e-18	3.24693e-17
SAA1	0.448038	1.00512e-17	3.34232e-17
GABRP	0.724336	1.13333e-17	3.76257e-17
CELA2A	1.51558	1.81485e-17	5.99626e-17
CPB1	0.944323	2.06811e-17	6.82213e-17
HSD11B2	0.714046	2.25785e-17	7.43615e-17
HES1	0.325293	2.324e-17	7.64181e-17
SCTR	0.396003	2.72011e-17	8.91591e-17
CXCL1	0.505575	2.85245e-17	9.3349e-17
KIF12	0.365557	3.41001e-17	1.11243e-16
PLAUR	0.301358	4.13676e-17	1.34104e-16
SCD	0.509236	4.51946e-17	1.4628e-16
UGT2A3	0.635406	6.02937e-17	1.94846e-16
ACKR3	0.936348	7.03184e-17	2.26887e-16
ZEB1	0.33733	1.04847e-16	3.37243e-16
SORD	0.533319	1.44806e-16	4.62885e-16
TMEM45B	0.664834	1.52066e-16	4.83847e-16
MIA	0.666847	1.79098e-16	5.68107e-16
RGS4	2.0689	1.8858e-16	5.97266e-16
PROM1	0.527695	1.89175e-16	5.98232e-16
LEF1	0.536709	2.01831e-16	6.37281e-16
MT1F	0.271548	2.59081e-16	8.15551e-16
C1QTNF1	0.289149	3.04116e-16	9.54407e-16
EGR2	1.01336	3.28897e-16	1.03061e-15
PNLIP	0.962504	3.8318e-16	1.19527e-15
CNN1	0.617136	4.44922e-16	1.38577e-15
EHF	0.549212	9.98114e-16	3.09011e-15
CTRB1	0.873528	1.12021e-15	3.4526e-15
EGLN3	0.402056	1.39518e-15	4.29367e-15
GADD45A	0.301045	1.47599e-15	4.53445e-15
DUOXA2	0.679908	1.47781e-15	4.53445e-15
HSD17B2	0.405605	1.78752e-15	5.46849e-15
UBD	0.596001	3.90495e-15	1.1841e-14
NEGR1	1.29611	4.55573e-15	1.37941e-14
CXCL3	0.399657	4.68944e-15	1.41782e-14
HAS2	1.93853	4.84356e-15	1.46227e-14
GDF15	0.463552	5.83052e-15	1.75511e-14
SERPINB5	0.921505	6.2597e-15	1.87882e-14
SERPINI2	3.41502	6.71269e-15	2.01186e-14
MUC13	0.501617	6.83247e-15	2.04479e-14
HILPDA	0.33638	1.55239e-14	4.60587e-14
CFTR	0.289092	1.76643e-14	5.21843e-14
TMEM37	0.488133	2.08214e-14	6.13354e-14
SOD2	0.349814	2.85937e-14	8.39913e-14
ARL14	0.631144	4.2626e-14	1.25032e-13
FMO1	1.57401	4.36581e-14	1.27878e-13
KCNE3	0.729402	6.16917e-14	1.7968e-13
PTGER3	0.80249	6.68328e-14	1.93834e-13
KIAA1324	0.966589	1.21826e-13	3.4989e-13
MSLN	0.331832	1.37814e-13	3.95258e-13
PCSK1N	0.224768	1.90908e-13	5.46018e-13
APBA2	1.09047	2.62824e-13	7.4963e-13
C7	0.326569	3.28073e-13	9.33154e-13
ADAMTS6	0.59882	3.32564e-13	9.44628e-13
LINC01133	0.385991	3.63485e-13	1.03104e-12
SLC2A1	0.29142	5.12143e-13	1.44675e-12
CELA2B	2.17128	5.63858e-13	1.58633e-12
CYP26A1	3.59947	6.01159e-13	1.68667e-12
DMBT1	1.29185	7.45852e-13	2.08697e-12
AGR3	0.383077	7.58619e-13	2.11982e-12
CTRL	2.41733	7.70398e-13	2.14983e-12
PTHLH	1.55559	1.1513e-12	3.20408e-12
KLK11	0.389742	1.33877e-12	3.71081e-12
COL5A3	1.05612	1.39645e-12	3.86033e-12
ABI3BP	0.90918	2.70208e-12	7.39045e-12
AMN	0.466535	2.86196e-12	7.81738e-12
ANKRD36C	0.326507	2.97693e-12	8.1207e-12
ID1	0.247249	3.07119e-12	8.36675e-12
PRSS22	0.42113	3.39596e-12	9.23934e-12
RGS3	0.230237	3.62848e-12	9.85897e-12
GPC3	0.593632	3.75653e-12	1.01801e-11
LINC00342	0.570934	4.31605e-12	1.16658e-11
S100A14	0.295471	4.35777e-12	1.17631e-11
CRP	1.19318	4.4371e-12	1.19616e-11
RASL11B	1.82929	4.77164e-12	1.28467e-11
CTSZ	0.284183	4.89227e-12	1.31543e-11
FAM3D	0.720059	5.00574e-12	1.34419e-11
CES2	0.326923	5.15382e-12	1.38037e-11
MUC5B	0.706069	9.01106e-12	2.39483e-11
KCNE4	0.324608	9.50935e-12	2.52401e-11
AQP8	3.01305	1.08067e-11	2.86467e-11
LIF	0.840746	1.19891e-11	3.16999e-11
STRA6	1.6671	1.3556e-11	3.57969e-11
LDLR	0.364419	1.40932e-11	3.71679e-11
C2CD4B	0.82388	2.34518e-11	6.1535e-11
UGT2B7	1.11422	2.52416e-11	6.59391e-11
REG1B	0.894695	3.19052e-11	8.28732e-11
RASSF6	0.435833	3.44417e-11	8.92373e-11
ZG16B	0.410346	3.80525e-11	9.8346e-11
BCAS1	0.530305	4.17939e-11	1.07881e-10
AMY2A	1.06334	5.48596e-11	1.41253e-10
HHIP	2.85437	7.97504e-11	2.04323e-10
SLC6A14	0.717965	9.75651e-11	2.48424e-10
ABCA6	1.20372	1.66034e-10	4.19143e-10
TRIM31	0.665463	1.7385e-10	4.3834e-10
EPS8L1	0.308091	4.27506e-10	1.0649e-09
FBXO2	0.385621	4.65098e-10	1.15714e-09
CES1	0.560419	6.50085e-10	1.61155e-09
CST2	1.54888	6.54002e-10	1.61932e-09
FGGY	0.273439	6.61907e-10	1.63693e-09
GBP1	0.18888	7.74958e-10	1.91422e-09
NMB	0.246143	8.64207e-10	2.12958e-09
DLX5	1.74125	9.58858e-10	2.36e-09
WISP2	1.63964	9.89344e-10	2.43214e-09
HPGD	0.482462	1.18069e-09	2.89564e-09
TM4SF4	0.30225	1.24913e-09	3.05622e-09
RBP4	0.453363	1.33733e-09	3.26429e-09
AKR1B10	0.78758	1.39316e-09	3.39655e-09
FRZB	0.0832481	1.51133e-09	3.67596e-09
RHOV	0.378835	1.52764e-09	3.71126e-09
PRSS1	0.683539	1.54548e-09	3.75019e-09
HSPA1B	0.14329	1.68452e-09	4.07799e-09
MRVI1	0.464263	1.96367e-09	4.74822e-09
ODAM	1.30646	2.25714e-09	5.41977e-09
CALB2	1.22468	3.06101e-09	7.31595e-09
ALDOB	0.843406	3.43255e-09	8.16614e-09
DNAJB1	0.190466	3.56453e-09	8.47036e-09
SLC6A8	0.300365	4.08455e-09	9.68381e-09
ACTG2	0.527987	4.34988e-09	1.02892e-08
COL14A1	0.315996	4.48228e-09	1.05903e-08
CCND1	0.182408	7.03588e-09	1.63985e-08
MMP3	1.27275	7.54256e-09	1.75399e-08
SCD5	0.211423	8.38698e-09	1.94816e-08
DEFB1	0.122547	8.59945e-09	1.99527e-08
NOTCH3	0.0374693	8.62199e-09	1.99825e-08
SLIT3	0.290823	8.84972e-09	2.04644e-08
SCUBE3	2.99526	8.96907e-09	2.07172e-08
CEACAM5	0.63577	9.87191e-09	2.27263e-08
MT1H	0.575177	1.6882e-08	3.85208e-08
CLDN11	1.25003	1.88871e-08	4.30008e-08
KLK7	0.883612	2.09012e-08	4.74579e-08
PDGFD	0.194588	2.13723e-08	4.84456e-08
KLK4	3.43409	2.30557e-08	5.20897e-08
ATP10B	0.769764	2.32548e-08	5.24821e-08
VWA5A	0.305072	2.99695e-08	6.73416e-08
SERPINA5	0.158768	3.45037e-08	7.73616e-08
SCRG1	0.811584	3.71243e-08	8.30571e-08
CA12	0.413987	3.91538e-08	8.74083e-08
LYPD1	0.812225	3.95615e-08	8.8223e-08
PTGES	0.520695	3.96575e-08	8.83418e-08
TNFAIP2	0.212027	4.9681e-08	1.10195e-07
S100P	0.236757	5.73257e-08	1.26743e-07
AOC1	0.57431	5.84607e-08	1.29114e-07
SLC3A1	0.208996	6.38927e-08	1.4096e-07
AKR1C1	0.300246	7.99018e-08	1.75716e-07
TMEM47	0.126112	8.22497e-08	1.80303e-07
HAND2-AS1	0.751243	1.05416e-07	2.29866e-07
NR1D1	0.37265	1.13565e-07	2.47115e-07
CCL28	0.286319	1.2909e-07	2.80012e-07
CLDN18	0.400701	1.95793e-07	4.23364e-07
ID4	0.234404	2.16638e-07	4.66971e-07
EGR3	0.488575	2.18375e-07	4.70223e-07
PLA2G2A	0.72384	2.38228e-07	5.12437e-07
ANXA13	0.60235	2.40288e-07	5.16332e-07
SULT1E1	1.15506	3.42747e-07	7.33444e-07
MACC1	0.24113	5.68249e-07	1.20724e-06
MRGPRF	0.434499	6.0243e-07	1.27723e-06
PTN	0.155552	6.08939e-07	1.28848e-06
KRT17	0.163426	6.08985e-07	1.28848e-06
SULT1C2	0.43484	6.22974e-07	1.31538e-06
DNAJB4	0.110544	6.40329e-07	1.35064e-06
DIRAS3	0.793829	7.34907e-07	1.54383e-06
MMP9	0.7027	8.65897e-07	1.81531e-06
CA9	0.418613	9.12049e-07	1.91012e-06
S100A2	0.0809433	9.78041e-07	2.04626e-06
HLA-DRB5	0.303467	9.88341e-07	2.06571e-06
RCAN1	0.0288137	1.027e-06	2.14217e-06
HMGCS2	1.37048	1.1564e-06	2.40238e-06
PLN	0.0873725	1.22436e-06	2.54101e-06
AMY2B	0.830088	1.47459e-06	3.05726e-06
TNFSF4	1.53503	1.4885e-06	3.08299e-06
C6orf222	0.630901	1.49463e-06	3.09066e-06
AQP3	0.130657	1.62581e-06	3.35395e-06
SUPT5H	0.113367	1.74851e-06	3.59987e-06
PHLDA1	0.0869789	1.81276e-06	3.72843e-06
MS4A8	0.57717	2.22879e-06	4.56593e-06
RSAD2	0.405554	2.57372e-06	5.2569e-06
THBS4	0.409871	2.85834e-06	5.82673e-06
FGA	1.64186	2.93074e-06	5.96841e-06
ADAM19	0.346156	3.01418e-06	6.13231e-06
SOX11	2.92037	3.04871e-06	6.19644e-06
SFRP5	0.0897999	3.93634e-06	7.94579e-06
FGL1	2.7068	3.98003e-06	8.01831e-06
LMTK3	0.369527	4.05828e-06	8.16002e-06
KCNJ15	0.192243	4.12213e-06	8.28035e-06
CEACAM1	0.306953	4.46328e-06	8.95692e-06
VSIG1	0.688518	4.48285e-06	8.98747e-06
FGG	2.21124	5.01582e-06	1.00365e-05
CCL15	0.744786	5.07158e-06	1.01382e-05
MGP	0.32356	5.18753e-06	1.035e-05
EMP1	0.133657	6.16747e-06	1.22814e-05
BEX5	0.224108	6.86821e-06	1.36505e-05
AMBP	0.143841	7.29149e-06	1.44778e-05
SLC37A4	0.121264	7.7898e-06	1.54524e-05
MECOM	0.181087	8.15948e-06	1.61702e-05
ASS1	0.111401	8.30102e-06	1.64349e-05
UGT2B15	1.03754	8.90438e-06	1.75789e-05
GMNN	0.021688	1.13968e-05	2.23924e-05
MUC20	0.36397	1.22364e-05	2.39735e-05
PHGDH	0.0900403	1.43756e-05	2.81114e-05
GGT1	0.244348	1.63751e-05	3.19609e-05
PI3	0.244782	2.10592e-05	4.08714e-05
TXNRD1	0.0848745	2.22854e-05	4.31701e-05
FCGBP	0.198768	2.2623e-05	4.3783e-05
RERG	0.0894766	2.46076e-05	4.75793e-05
GPM6B	0.234377	2.70889e-05	5.23279e-05
AVIL	0.433102	2.78085e-05	5.36178e-05
EPHA3	0.659674	2.89962e-05	5.58555e-05
FMO2	0.732872	3.63319e-05	6.95323e-05
GRB7	0.199434	3.67407e-05	7.02497e-05
APCS	1.11771	3.7443e-05	7.15263e-05
ABCA8	0.47359	4.28805e-05	8.15362e-05
TRIB1	0.0962281	6.2077e-05	0.000117929
CFD	0.0806236	6.64469e-05	0.000125883
RGS2	0.00435134	6.67189e-05	0.000126167
ITGB8	0.0970102	7.16027e-05	0.000134908
VWA1	0.0177818	7.35549e-05	0.00013846
ITGA1	0.0555249	7.81561e-05	0.000146854
MUC5AC	0.26846	8.10108e-05	0.000152079
COL9A3	0.497041	9.82595e-05	0.000184125
HAS1	1.36114	0.000129161	0.000240502
TNS4	0.716116	0.000149011	0.000276219
KDM6B	0.0783635	0.000152341	0.000281885
KLK6	0.252526	0.000164832	0.000304453
SPTSSB	0.471475	0.00016643	0.00030713
PPP1R12B	0.0465093	0.000168323	0.000310346
SCN7A	0.913289	0.000188756	0.000347089
CDCA7	0.251678	0.000189756	0.000348617
HEG1	-0.159924	0.000216777	0.000397905
SPINK5	0.524565	0.000222301	0.000407684
CDH17	0.500899	0.000228758	0.000419153
STMN2	0.746949	0.000244015	0.000446316
PDE4C	0.260873	0.000251012	0.000458707
PLEKHF1	0.0842621	0.000262218	0.000477917
KLK8	0.506743	0.000282382	0.000513761
FHL1	-0.0197873	0.000321786	0.000583396
SCG2	0.849393	0.000333336	0.000602749
ANKRD37	0.0258212	0.00035789	0.000644888
COL17A1	0.282803	0.00040017	0.000718567
C4BPA	0.921831	0.000402344	0.000721843
PTPRG	-0.0164015	0.000411055	0.000736191
UBE2S	0.0546099	0.000424904	0.000759677
MUC4	0.436446	0.000426427	0.000761741
QPCT	0.101262	0.000446397	0.000796035
MTRNR2L1	0.651632	0.000461658	0.00082183
CYGB	0.0923434	0.000480736	0.00085432
TFPI	0.0956147	0.000525775	0.000931954
RSPO3	0.809101	0.000526814	0.000932994
HSD11B1	0.514938	0.000532252	0.000941816
TUBB2B	0.839371	0.000622564	0.00109226
ANK2	0.859869	0.000663139	0.00116148
C2	0.235253	0.000687663	0.00120192
CDO1	0.409386	0.000688765	0.00120192
HSPH1	0.0399758	0.000689138	0.00120192
SUSD2	0.298553	0.000729768	0.00127063
INSIG1	0.005655	0.000734659	0.00127807
ARL4D	0.347326	0.000788123	0.00136763
LEFTY1	-0.0412325	0.000851374	0.0014712
VTN	0.241797	0.000943795	0.00162411
SFRP1	1.09733	0.00106924	0.00183083
LGALS7B	1.3015	0.0011056	0.00189152
ABCC9	0.280927	0.00112017	0.00191487
HK2	0.132063	0.00129733	0.00220674
MUC6	0.0200832	0.00139985	0.00237721
HES6	0.358298	0.00145651	0.00246936
TNC	0.460386	0.00155252	0.00262783
UNC5B-AS1	0.319476	0.00156642	0.00264919
ID3	0.0688094	0.00157861	0.00266762
GC	0.804578	0.00158165	0.00267056
CDHR5	0.254633	0.0016865	0.00284077
NTS	0.339903	0.00178518	0.00299628
BLNK	-0.0328179	0.00178616	0.00299628
UPK1B	0.357239	0.00184423	0.00308617
C11orf96	-0.0610373	0.00194493	0.00324941
KRT6B	0.620167	0.00202919	0.00338745
PMAIP1	-0.0480254	0.00229301	0.00382477
KRT15	0.309931	0.00237802	0.00396017
DUSP4	0.0395394	0.00258292	0.00429447
ANGPTL4	0.00597687	0.00260969	0.00433548
GPR155	0.0267443	0.00262746	0.0043615
CPS1	1.04539	0.00273265	0.00452883
CDH13	0.297378	0.00282583	0.00467951
PLXDC1	0.0837276	0.00302455	0.00500055
ARHGEF17	0.0204887	0.00307206	0.00507504
SDR16C5	0.162495	0.00307822	0.00508116
HIST1H2BD	0.0747159	0.00319996	0.00527789
LINC00261	0.309123	0.00321733	0.0053023
DIO3	1.5139	0.0034024	0.00559836
KRT23	0.00342151	0.00360803	0.00591785
MME	0.650219	0.00362026	0.0059332
NPR3	1.51554	0.0036768	0.00601631
TFPI2	0.192363	0.00382469	0.00625335
KCNJ16	0.0897561	0.00434935	0.00708872
KLK10	0.135284	0.00456962	0.00743598
PDGFA	-0.00914085	0.00488632	0.00793259
ARHGAP24	-0.156005	0.00495347	0.00803528
CRISP3	1.10774	0.00515967	0.00835664
CHRDL1	0.842407	0.00529789	0.00856707
IER5	-0.00564942	0.00557151	0.0089814
KCNJ8	0.0542552	0.00568937	0.00916423
HSPB6	-0.00407328	0.0057401	0.00923875
GCG	0.0607316	0.00576694	0.00927409
CLSTN2	1.13806	0.00577104	0.00927409
LZTS1	0.184739	0.00598238	0.00959876
NLGN4X	1.00064	0.00622216	0.00996801
SERPINA6	0.209887	0.0064789	0.0103713
F2RL2	1.39562	0.00668182	0.0106878
GZMK	-0.197569	0.00691699	0.0110383
BPIFB1	1.51872	0.00703111	0.0112118
KCNMA1	0.22218	0.0072739	0.0115721
FMO3	0.684263	0.00730269	0.011609
C16orf89	0.572243	0.00850074	0.0134308
LTF	0.705746	0.00874424	0.0137944
PAMR1	0.513945	0.00902261	0.014201
PLK2	-0.0124733	0.0092789	0.0145711
SERPINB3	0.905607	0.00937137	0.0147051
FXYD2	-0.0752904	0.00961867	0.0150474
MT1X	0.166428	0.00997336	0.0155599
TPPP3	-0.0069317	0.0118553	0.0183517
CHI3L1	0.227278	0.0120019	0.018537
TMEM130	1.61624	0.0122323	0.0188787
TNNT1	0.114537	0.0126874	0.0195518
ADAMTSL2	0.167303	0.0132114	0.0203291
PHACTR3	0.207153	0.013258	0.0203855
EBF2	0.322609	0.0137551	0.0211342
CLDN23	0.0775888	0.014072	0.021605
LBH	-0.0799004	0.0173118	0.026383
NOVA1	0.198863	0.0174883	0.0266322
TMEM204	-0.100694	0.0179596	0.0272896
C6	0.128932	0.0194212	0.0293593
KRT16	0.133176	0.0208478	0.0314469
SLC26A2	-0.160634	0.0209798	0.0316229
BACH2	0.22621	0.0214077	0.0322207
CENPW	0.0223541	0.0227471	0.0340877
AKAP7	-0.154489	0.0227819	0.034115
CST7	-0.261651	0.0231029	0.0345706
PRR16	0.00944598	0.0237705	0.0355181
CXCL5	0.146523	0.0241044	0.0359651
SPINK4	0.416963	0.0257278	0.0382766
PRAP1	0.156589	0.0259925	0.0386426
MSMB	0.530655	0.0272797	0.0404688
FOLR1	0.274114	0.0277205	0.0410049
CPEB4	-0.0655484	0.0277721	0.0410518
PCDH9	0.151655	0.0282604	0.0417437
CEACAM7	0.377497	0.0287349	0.0424142
ACY3	0.0547356	0.0287569	0.0424165
NMU	0.303931	0.0292218	0.0430714
NPW	0.478461	0.0300873	0.0442838
S100A1	0.398902	0.0301523	0.0443479
TTR	-0.187021	0.0307287	0.0451314
RTKN2	0.21095	0.0315196	0.0461617
LMOD1	-0.135446	0.0318768	0.0465857
PTX3	0.765687	0.0323248	0.0471736
CCK	0.730289	0.0330534	0.048135
EDN1	-0.0463534	0.0332145	0.0483354
TPSAB1	0.194615	0.0334833	0.048658
CCL26	0.240954	0.0361772	0.0523884
ALOX15B	0.540743	0.0387367	0.0558208
TNNC2	0.235778	0.0389498	0.0560888
VNN2	0.167056	0.0391384	0.0563211
ZFAND2A	-0.0668308	0.0413429	0.0592457
TNFRSF11B	0.306463	0.0420105	0.0601189
DKK1	0.243393	0.0433007	0.0617087
GADD45G	-0.0522	0.0439987	0.062617
PADI1	0.451687	0.0441443	0.062781
MALL	0.0146205	0.0448918	0.0638001
CST4	1.46321	0.0455012	0.0645774
TGM2	-0.0204965	0.0475949	0.0673636
SST	-0.0883704	0.0488465	0.0690876
SYNPO2	-0.157385	0.0495902	0.0700436
IL1R2	0.161743	0.0517793	0.0728863
PLA2G5	0.845171	0.053247	0.0748503
EDN2	0.603255	0.054365	0.0763699
PTGS2	0.0266193	0.0556564	0.0779718
OSR1	1.10102	0.056059	0.0784826
RNF186	0.0991572	0.0601014	0.0840849
AKR1C2	0.173019	0.0619891	0.0865501
MIR145	-0.0229175	0.0667263	0.0928503
SCGB2A1	0.190814	0.0669979	0.0931027
ACSL1	-0.0864404	0.0700853	0.0971969
DCDC2	-0.0594512	0.0711486	0.0984732
HOXB-AS1	-0.15382	0.0722721	0.0999611
NR4A1	-0.0215862	0.0754567	0.103809
MIR503HG	0.594257	0.0768926	0.105574
ITPKA	0.501036	0.0781143	0.107161
ITGA10	0.0345855	0.078152	0.107161
ACOT7	-0.0254692	0.078208	0.107166
SAA2	0.0930654	0.0802973	0.109956
FBLN7	0.0726592	0.0807932	0.110489
ACE2	0.421089	0.0809467	0.110625
CCL19	-0.287923	0.0835736	0.11414
COL18A1	0.0422902	0.0852845	0.116323
IL11	0.99101	0.0856733	0.116699
TFRC	-0.052469	0.0877805	0.11949
CRYM	0.425592	0.0892488	0.121329
CITED2	-0.120054	0.0916537	0.124271
CBLN4	1.08997	0.0918148	0.124408
GUCY1A2	-0.06441	0.0934918	0.126349
TFF2	0.0160153	0.093786	0.126663
HOTAIRM1	-0.100631	0.0985052	0.132776
INMT	-0.0270698	0.099789	0.134244
NPTX2	0.148661	0.101242	0.136022
FBP1	-0.0919471	0.102841	0.1379
DPCR1	0.14505	0.103968	0.139141
IL1RN	-0.0507728	0.1069	0.142603
FAM46C	-0.208417	0.107606	0.143452
TFF3	0.0632617	0.113217	0.150446
PHGR1	0.0523101	0.124345	0.164387
BDKRB1	0.487523	0.132512	0.173848
TCF7	-0.308231	0.132878	0.174217
TMSB15A	0.654125	0.136591	0.178519
PROX1	-0.115877	0.142547	0.185369
C1QTNF4	0.542949	0.145227	0.188495
NCCRP1	0.209861	0.146091	0.189377
MYBPC1	0.687516	0.154922	0.200448
TDO2	0.158683	0.162062	0.209161
C11orf53	0.442222	0.163469	0.210582
IFI27	0.255458	0.167385	0.215091
SLC38A1	-0.148753	0.174825	0.223677
SERPINB4	0.858739	0.185117	0.235821
MUC17	0.236285	0.189119	0.240475
ITLN1	0.868974	0.191914	0.243728
PCDH20	0.909458	0.19333	0.245226
AC073218.2	0.464649	0.197638	0.250075
NCOA7	-0.0493211	0.198852	0.251149
TBX3	-0.143082	0.204569	0.258054
PTH1R	0.301019	0.206072	0.259633
PTPRN	0.190242	0.216393	0.271478
ADH6	0.622485	0.225543	0.281588
ADH1B	-0.0197028	0.225706	0.281621
CST6	0.000993341	0.226264	0.282147
ADAMTS5	0.195339	0.230236	0.28658
TM4SF20	0.237573	0.235623	0.292757
LRRC26	0.203274	0.242927	0.300745
NGFR	0.127489	0.244342	0.302317
EGFL6	-0.0554502	0.247132	0.305402
SLC17A4	-0.0445213	0.249941	0.30832
FAM83A	0.25083	0.252981	0.311698
PSCA	-0.072439	0.261478	0.321591
SFTA1P	0.176662	0.267728	0.328691
LAIR2	-0.0985946	0.284467	0.346768
TNFSF14	-0.0008874	0.287854	0.350319
CCDC144A	0.057446	0.288076	0.35034
ZC3HAV1	-0.194746	0.288706	0.350693
RNF39	0.108675	0.289929	0.351765
TM4SF1	0.194962	0.29218	0.354079
SH2D6	0.226111	0.293363	0.355305
ANGPTL1	-0.198171	0.294161	0.356063
KRT13	0.104302	0.295248	0.357169
NCAM1	0.164256	0.297345	0.359495
HSPA2	-0.23844	0.299357	0.361505
SUCNR1	0.2799	0.313106	0.377005
PAH	0.233753	0.313366	0.377098
RBP2	0.444595	0.31484	0.378431
ANLN	0.139009	0.323976	0.388057
HIST1H1C	-0.0752427	0.324705	0.388705
IAPP	-0.215978	0.340321	0.404352
TMEM100	-0.0496384	0.344051	0.408313
SCEL	0.132259	0.347392	0.411568
SIDT1	0.0048613	0.349874	0.414034
CD70	-0.123211	0.366811	0.43259
CTSV	0.100872	0.373256	0.439465
WDR66	-0.125895	0.376035	0.441702
LIPG	0.155167	0.383524	0.449987
G0S2	-0.228522	0.386757	0.453265
PAEP	0.106411	0.391611	0.458433
KLHL23	-0.183036	0.397219	0.463422
AGTR1	-0.0977293	0.404256	0.471365
PPP1R1A	0.155306	0.40723	0.474031
IL18	-0.0955071	0.409688	0.476622
PGC	-0.0136107	0.410896	0.477751
PRG4	0.309674	0.415126	0.482135
TYMS	-0.257441	0.42545	0.49274
FJX1	-0.0333138	0.426628	0.493827
VEGFC	-0.250652	0.438412	0.505766
HRASLS2	0.00538644	0.456212	0.524542
BIRC7	0.155487	0.474648	0.541817
GABRA2	0.281397	0.479636	0.546907
TK1	-0.214486	0.482802	0.550214
CYB561A3	-0.332802	0.487925	0.555642
PIP	0.00727086	0.488104	0.555642
FGFBP1	0.183591	0.49246	0.559675
BCYRN1	0.0642449	0.499528	0.566461
SLC7A2	-0.343346	0.500885	0.567579
APOBEC2	-0.158514	0.501063	0.567579
REP15	0.0860327	0.50327	0.569766
MACROD2	-0.252355	0.503663	0.569898
CYP27A1	-0.270173	0.51787	0.584053
HS3ST1	-0.0455685	0.522433	0.588556
BCL11B	-0.269708	0.524818	0.590921
TFF1	0.107015	0.525568	0.591443
CCL3	-0.382861	0.53398	0.60049
SLC34A2	-0.0419279	0.538746	0.605283
CTNNAL1	-0.229728	0.543515	0.608984
BAG3	-0.179681	0.553237	0.618962
CLDN14	0.27088	0.556217	0.620523
MATN2	-0.164183	0.558368	0.622587
CDH19	0.152901	0.562391	0.625323
SCGN	-0.358311	0.565704	0.62839
COL4A2	-0.0913342	0.575599	0.638009
KLRD1	-0.503075	0.580712	0.642642
ARHGEF39	0.0402944	0.581699	0.643389
ABCB4	-0.0134282	0.583788	0.645009
CA2	-0.108719	0.585877	0.646971
EMB	-0.261543	0.587217	0.647891
CCL18	-0.366616	0.587337	0.647891
SESN1	-0.399236	0.591533	0.651822
MMP10	0.217725	0.593103	0.653204
GATA3	-0.279066	0.597299	0.657125
TNNC1	-0.00898409	0.607578	0.666657
SAA4	0.0763397	0.612733	0.671957
MAFB	-0.250711	0.62133	0.67922
LRRN3	0.0308531	0.62869	0.685089
CREB5	-0.211025	0.63441	0.690594
SERPINB2	0.0227106	0.636518	0.692524
GPA33	-0.0601736	0.638252	0.694044
CA3	0.211898	0.640311	0.695917
LY6D	-0.195032	0.641634	0.696621
TRIM29	-0.095593	0.643465	0.697876
LAMC3	0.030215	0.650661	0.70457
CRLF1	0.0853341	0.660663	0.714277
RNF152	-0.213144	0.665344	0.717951
COL15A1	-0.425359	0.665452	0.717951
NR4A3	-0.186717	0.666675	0.718895
LYNX1	-0.0603413	0.669532	0.720847
C6orf15	0.121739	0.675641	0.726288
BIRC5	-0.205916	0.680358	0.730598
SEMA7A	-0.160145	0.682082	0.732068
GLIPR2	-0.292662	0.683465	0.733171
KISS1	0.195341	0.703431	0.751466
POU2F3	-0.0486668	0.715306	0.762646
SOSTDC1	0.0479747	0.722589	0.769148
ATF5	-0.254246	0.726513	0.772131
NRG1	-0.167935	0.729154	0.774099
LYPD3	-0.228528	0.731959	0.775922
ADAMTS15	-0.110896	0.734109	0.777801
OASL	-0.188348	0.738761	0.780728
PCNA	-0.23059	0.740893	0.78258
BRSK2	-0.552364	0.743443	0.784471
LAMP3	-0.169462	0.755586	0.796064
TMEM178A	-0.094851	0.760058	0.799145
ZCCHC18	-0.337014	0.769859	0.808627
TSLP	-0.139775	0.773162	0.811682
KIT	-0.262094	0.792897	0.828609
ALG9	-0.27596	0.799902	0.835507
CCNB1	-0.167756	0.805911	0.841358
CRCT1	-0.0292112	0.814092	0.848183
MYOM2	-0.227216	0.815539	0.849262
LYPD2	0.0576863	0.825632	0.858029
HMCES	-0.225632	0.828841	0.860079
CHGA	-0.461772	0.833441	0.863551
HIST1H2BJ	-0.193275	0.850328	0.878403
FXYD1	-0.312012	0.854309	0.881843
AREG	-0.171164	0.856232	0.882526
PAX6	-0.196223	0.862159	0.887517
ZWINT	-0.297025	0.865409	0.889667
GRB10	-0.329237	0.883333	0.905667
HP	-0.183878	0.883738	0.905667
ITGA5	-0.267486	0.885527	0.906806
MUC16	-0.167001	0.885727	0.906806
PRC1	-0.217551	0.889075	0.908881
PI16	-0.27965	0.908377	0.926591
ARID5B	-0.0304767	0.908643	0.926591
KLF2	-0.157069	0.914279	0.930959
COCH	-0.513347	0.929807	0.944443
KRT6A	-0.362266	0.936616	0.95089
DHRS2	-0.526763	0.947847	0.960405
PTGDR	-0.435363	0.961004	0.971828
CAMK4	-0.545873	0.96688	0.977292
CHGB	-0.522123	0.970708	0.980681
JAKMIP1	-0.596868	0.978814	0.985729
PNMT	-0.251648	0.981264	0.986519
C9orf47	-0.165493	0.986015	0.989166
HLA-G	-0.365144	0.989985	0.992388
TCEAL2	-0.697034	0.99055	0.992472
CCNB2	-0.271982	0.993504	0.994467
CHIT1	-0.589906	0.998088	0.998088
GUCA2B	-0.130901	0.996515	0.996998
C21orf62	-0.400986	0.992258	0.993701
SCGB3A1	-0.242349	0.986292	0.989166
TTYH1	-0.371914	0.985215	0.989046
CDC20	-0.270203	0.984779	0.989046
AC017002.1	-0.413629	0.983344	0.988129
KLRF1	-0.589953	0.980915	0.986519
EIF1AY	-0.41456	0.979523	0.985729
PLK1	-0.385629	0.979365	0.985729
CXCL11	-0.465043	0.975512	0.983129
CDCA8	-0.330533	0.974174	0.98226
G6PC2	-0.63679	0.97346	0.98202
ESM1	-0.379847	0.972989	0.98202
IL18R1	-0.464815	0.971476	0.980977
MAGEA4	-0.322267	0.960568	0.971828
PLCE1	-0.314871	0.954282	0.965977
FGF19	-0.144896	0.949564	0.961672
SPRR3	-0.291813	0.942765	0.955724
CCL17	-0.700487	0.940401	0.953796
DLGAP5	-0.312912	0.939913	0.953769
S1PR3	-0.288506	0.923899	0.938903
FAM177B	-0.370804	0.917889	0.933255
SPRR1B	-0.379858	0.917876	0.933255
CH25H	-0.425693	0.91539	0.931631
ADM	-0.235343	0.912774	0.929886
DLK1	-0.572361	0.909433	0.926939
HIST1H2AK	-0.708045	0.903446	0.922202
LINC00671	-0.610821	0.900444	0.919593
PTGER4	-0.465731	0.890366	0.90975
LY6H	-0.65369	0.888678	0.908881
CENPF	-0.223541	0.888666	0.908881
UPK3B	-0.201647	0.882525	0.905322
ACAN	-0.47518	0.878599	0.901743
ITIH5	-0.302961	0.874688	0.898175
ABCC8	-0.598626	0.867119	0.890846
PROCR	-0.246634	0.86554	0.889667
PI15	-0.335135	0.863142	0.888086
PTTG1	-0.33416	0.85983	0.88556
SNX22	-0.641109	0.856456	0.882526
KRT81	-0.550862	0.855012	0.881918
SLC30A8	-0.724444	0.854512	0.881843
ZNF683	-0.813472	0.849139	0.877613
PCOLCE2	-0.657602	0.846936	0.875775
CHST1	-0.357912	0.846525	0.875775
PIF1	-0.506944	0.843276	0.872864
MAD2L1	-0.421922	0.835317	0.86506
CCL4	-0.363128	0.832393	0.862897
KLRC2	-0.771628	0.830857	0.861738
KRT14	-0.533501	0.828294	0.859944
SERPINB7	-0.272044	0.826035	0.858029
HMMR	-0.303253	0.823726	0.856493
CD8A	-0.665705	0.822217	0.855354
FOXP3	-0.982253	0.820106	0.853588
PPY	-0.315693	0.81364	0.848141
DES	-0.782732	0.807431	0.842094
RNGTT	-0.474231	0.80732	0.842094
ADAMTS8	-0.589457	0.788979	0.824932
GPR82	-0.480016	0.78846	0.824807
TOP2A	-0.330783	0.786573	0.823251
XCL1	-0.79671	0.784787	0.821798
C15orf48	-0.157562	0.780792	0.818029
NELL2	-0.758141	0.778827	0.816385
DHRS9	-0.196083	0.778291	0.816237
TPX2	-0.309781	0.775851	0.814092
QRSL1	-0.467945	0.761827	0.800597
PLAC9	-0.304383	0.75842	0.797828
GM2A	-0.373526	0.757876	0.797662
IPCEF1	-0.648517	0.757667	0.797662
NFATC2	-0.294869	0.752544	0.793263
IL1RL1	-0.737761	0.745739	0.786492
DDIT4L	-0.927212	0.742919	0.784319
SLFN12L	-0.803391	0.738518	0.780728
SIDT1-AS1	-0.834192	0.737922	0.78064
HBA1	-0.59676	0.736812	0.779865
KRT5	-0.824408	0.736444	0.779865
APOBEC3C	-0.300943	0.729865	0.774099
PCP4	-0.653766	0.729637	0.774099
CNGA1	-0.382911	0.729335	0.774099
RRAD	-0.376491	0.725888	0.771864
ITGB2-AS1	-0.569417	0.723081	0.769274
MIR7-3HG	-0.717275	0.717039	0.763633
BEX1	-0.629426	0.716487	0.763439
CCL21	-0.628401	0.715373	0.762646
TNFRSF9	-0.97623	0.712055	0.759893
CCL22	-1.10982	0.709452	0.757507
PTCH2	-0.532102	0.702373	0.750725
KCNJ2	-0.712145	0.69762	0.746031
IL23A	-0.544278	0.696607	0.745333
UBE2C	-0.414367	0.696032	0.745105
RASGRP1	-0.498267	0.694968	0.744351
PEG10	-0.449999	0.688651	0.737968
EOMES	-1.00288	0.685902	0.735404
CXCL9	-0.629048	0.678837	0.729344
KLRC1	-0.860041	0.673565	0.724433
GZMH	-0.635352	0.672477	0.72364
MKI67	-0.377767	0.667865	0.719427
FDCSP	-0.758459	0.66769	0.719427
CTRB2	0.304283	0.664641	0.717826
SMTNL2	-0.869607	0.664077	0.717593
KLHDC7B	-0.523409	0.657802	0.711556
CENPE	-0.382073	0.657679	0.711556
ZBED2	-1.0095	0.650399	0.70457
KRT20	-0.301057	0.649119	0.703638
SLA2	-0.876367	0.643221	0.697876
SBSPON	-0.594313	0.640725	0.696001
HEPACAM2	-0.659696	0.629595	0.685714
CADM3	-1.01749	0.627942	0.684635
CENPA	-0.560014	0.626764	0.683712
KRT86	-0.940315	0.625983	0.683222
CFHR1	-1.35709	0.624242	0.681682
CALML5	-1.20148	0.622038	0.679634
GUCY2C	-0.741835	0.619433	0.677505
TNIP3	-1.07938	0.619302	0.677505
IFNG	-1.13371	0.619086	0.677505
CCL13	-0.851264	0.618097	0.67712
IFIT3	-0.278487	0.617572	0.676903
FGFBP2	-1.04795	0.607102	0.666489
HEYL	-0.420427	0.606657	0.666354
TBX21	-1.03386	0.606171	0.666175
NSG1	-0.953984	0.602262	0.662231
C1orf56	-0.306447	0.594426	0.654312
IDO1	-0.857398	0.588145	0.648435
PCSK1	-1.00451	0.58342	0.644948
APOA4	-1.11186	0.580624	0.642642
SPINK2	-1.10612	0.575984	0.638094
LINC00926	-0.5372	0.569129	0.631177
HIF1A-AS2	-0.599785	0.568281	0.630575
GTSE1	-0.551309	0.566082	0.628473
ANGPT1	-0.550652	0.562639	0.625323
FABP2	-0.569753	0.562362	0.625323
INSR	-0.218082	0.562155	0.625323
GNLY	-0.45657	0.562013	0.625323
ARHGAP11B	-0.590927	0.561214	0.625323
CEBPA	-0.363135	0.554518	0.618962
KCNA3	-1.46645	0.554355	0.618962
GAD2	-1.07516	0.55405	0.618962
SUSD5	-1.1582	0.55389	0.618962
GZMA	-0.616056	0.553492	0.618962
MIR205HG	-0.810449	0.551189	0.617248
ECEL1	-1.21006	0.541715	0.607298
CCR10	-0.468122	0.5417	0.607298
MX2	-0.264767	0.541542	0.607298
RAB37	-0.665417	0.541318	0.607298
HSPB7	-0.701666	0.534189	0.60049
CCNA2	-0.583624	0.519838	0.585953
IRX2	-1.21077	0.517307	0.583737
MYBL2	-0.809302	0.514942	0.581386
SLC2A14	-0.983108	0.514497	0.581202
MPZ	-0.807842	0.510822	0.577366
PARP15	-0.854046	0.510788	0.577366
S1PR5	-0.979526	0.499093	0.566279
RPPH1	-0.728383	0.497071	0.564294
SCG3	-1.143	0.494282	0.561437
SPRR1A	-0.667929	0.490824	0.558123
LINGO1	-0.72037	0.488557	0.555851
GFI1	-1.61183	0.479063	0.546555
HIST1H4C	-0.156269	0.474224	0.541633
PVRIG	-1.95613	0.473209	0.540773
HEY2	-0.55942	0.471997	0.539686
RND1	-0.37802	0.467727	0.535101
DNAAF1	-1.0286	0.465623	0.532989
SRGAP3	-0.573264	0.464766	0.532302
FAM105A	-0.446641	0.462909	0.53047
XCL2	-1.0245	0.46286	0.53047
IGFBP1	-0.965733	0.462731	0.53047
NTRK3	-1.27866	0.462526	0.53047
HPGDS	-0.741073	0.457914	0.525913
NEUROD1	-1.48322	0.456957	0.525106
CCL4L2	-1.24097	0.455964	0.524542
C11orf21	-1.29842	0.45523	0.523996
CD8B	-0.715021	0.451981	0.520547
TSPAN32	-1.11451	0.448038	0.516294
WNT6	-1.32843	0.44574	0.513933
NKX2-2	-1.27502	0.43622	0.503518
PCSK2	-1.54587	0.434724	0.502072
CKAP2L	-0.962841	0.434446	0.502032
TNF	-0.897591	0.431409	0.498801
LINC00954	-1.4171	0.430274	0.497768
PADI2	-0.862008	0.42532	0.49274
CCDC102B	-0.310065	0.423001	0.490454
SAMD3	-1.03831	0.418082	0.485023
S100A7	-1.27883	0.415608	0.482423
RASL12	-0.533168	0.411121	0.477751
CXCL10	-0.687901	0.406371	0.473297
AP003774.1	-2.05496	0.404504	0.471388
LINC00426	-1.31881	0.396485	0.462828
NUAK2	-0.789401	0.395819	0.462311
EFNA1	-0.133597	0.39493	0.461534
CSF3	-1.3045	0.392942	0.459471
PASK	-0.757617	0.392135	0.458787
RASD2	-0.700039	0.389837	0.456616
AC022182.3	-2.01651	0.385127	0.451611
KLK5	-1.33575	0.377835	0.443564
IFI44L	-0.190787	0.375373	0.441175
BEX2	-0.483776	0.3753	0.441175
PIK3R6	-1.62856	0.373842	0.439877
ITGA6	-0.155952	0.373279	0.439465
BFSP2	-2.0636	0.367653	0.433335
CYP3A4	-1.58841	0.362892	0.428213
CLNK	-1.97954	0.362527	0.428027
LAG3	-0.783124	0.3623	0.428003
ASPM	-0.697473	0.355643	0.420379
NUF2	-0.688185	0.354255	0.418978
APOA1	-0.638049	0.34894	0.413166
JSRP1	-0.742012	0.346748	0.411041
REM1	-0.775973	0.346369	0.410829
PSTPIP2	-0.575906	0.343939	0.408313
FCRL1	-1.90685	0.339535	0.40365
TRPC6	-0.614152	0.339024	0.403275
GINS2	-0.735884	0.337585	0.401794
CD302	-0.364065	0.336357	0.400564
IL10	-1.54385	0.335794	0.400124
MYBL1	-1.23521	0.335621	0.400124
P2RY14	-1.01469	0.334147	0.398621
SNHG12	-0.397458	0.33413	0.398621
HIST2H2AA3	-0.268286	0.334086	0.398621
PDE3B	-0.985312	0.333795	0.398621
PRX	-0.913518	0.332647	0.397751
RRM2	-0.68906	0.32647	0.390592
NFATC1	-0.459036	0.321892	0.385784
CXCR6	-1.05411	0.319321	0.382925
GHRL	-0.977231	0.318137	0.381728
C1QTNF2	-0.668518	0.316748	0.380281
UBASH3A	-2.02768	0.315524	0.379033
RAB3C	-1.16686	0.314031	0.377679
NPY1R	-0.713446	0.312387	0.376359
SNORD3B-2	-1.35516	0.307354	0.370511
HLA-DQB2	-1.28037	0.304659	0.367477
GADD45B	-0.0722844	0.304082	0.366995
GCHFR	-0.227412	0.297998	0.360074
SNORD3B-1	-0.78884	0.29051	0.352263
AICDA	-2.86098	0.289879	0.351765
F10	-0.578828	0.288377	0.350499
FLT3LG	-0.734893	0.287889	0.350319
TLL1	-1.37405	0.28705	0.34971
CD200	-0.570005	0.282753	0.344882
CRTAM	-1.68647	0.282298	0.344531
MXD1	-0.271338	0.281936	0.344292
AURKA	-0.604783	0.281687	0.344192
HAMP	-0.989775	0.279491	0.341711
KCNAB1	-1.03439	0.273044	0.334026
SOWAHD	-1.67918	0.272278	0.333287
ICOS	-1.65456	0.272245	0.333287
GNG2	-0.58667	0.271965	0.333287
LTA	-2.57692	0.271849	0.333287
TIMP4	-1.31721	0.270241	0.331579
APOBEC3H	-1.40281	0.262398	0.322339
GLDN	-1.37528	0.261661	0.321625
CYFIP2	-0.63983	0.256715	0.315921
TNFRSF13C	-2.35047	0.25439	0.313247
SLAMF9	-1.69872	0.252693	0.311528
SPC25	-0.919757	0.249546	0.308017
CA4	-0.688873	0.248504	0.306915
FGD3	-0.811646	0.245717	0.303836
CTSB	0.210643	0.238173	0.295037
ADRA2B	-1.86726	0.23792	0.294901
IFIT1	-0.323584	0.237202	0.294187
FAM129C	-1.94149	0.236303	0.293248
SH2D2A	-0.83205	0.236118	0.293195
TXK	-1.43826	0.232157	0.288623
PGM5-AS1	-2.07744	0.230539	0.286785
SNAI3	-1.28117	0.22847	0.284554
PDCD1	-1.31724	0.227854	0.283959
ASF1B	-0.874386	0.224981	0.281056
IRF4	-2.18539	0.222058	0.277573
CSAG1	-1.23609	0.221236	0.276713
PTGIR	-0.514691	0.220856	0.276405
COL9A1	-1.6824	0.218369	0.273458
CSPG4	-0.623582	0.21834	0.273458
IL6	-0.499258	0.217495	0.272695
C1orf228	-0.975411	0.214859	0.269716
HIF3A	-0.387919	0.211854	0.266106
PATL2	-1.15826	0.20951	0.263323
GPR132	-1.05796	0.209292	0.263209
CTLA4	-1.50366	0.207443	0.261042
PLA1A	-0.891854	0.207112	0.260784
PNOC	-1.4168	0.205635	0.259241
DUSP5	-0.360428	0.200108	0.252582
ALPL	-0.95631	0.198665	0.251066
CNR2	-2.76132	0.198295	0.250753
SLC16A6	-1.64181	0.197441	0.249979
TNFSF8	-2.42004	0.19426	0.246103
CLSPN	-0.988435	0.193961	0.245874
C16orf74	-0.699561	0.192739	0.244626
SCN4B	-1.00212	0.190818	0.242486
CDH6	-0.503764	0.18875	0.240153
CDKN3	-0.513045	0.185541	0.236216
PTGER1	-1.02803	0.183615	0.234053
SLC16A10	-1.0484	0.182848	0.233218
CDCA3	-0.794668	0.18197	0.232242
LUCAT1	-1.9693	0.179842	0.229668
SLC7A11	-0.553852	0.178939	0.228657
CD300LG	-3.81581	0.176845	0.22612
PKHD1L1	-2.78322	0.174492	0.223388
FABP3	-0.992769	0.174133	0.223067
ITPRIP	-0.504423	0.173178	0.221982
THEMIS	-1.89983	0.172092	0.220727
PCK1	-0.956798	0.171621	0.22026
ATP1A2	-1.85822	0.170413	0.218845
NUSAP1	-0.659046	0.166922	0.214629
APOBEC3A	-2.52169	0.164599	0.211774
FCRL3	-2.10989	0.164344	0.211578
SLAMF6	-1.175	0.163344	0.210553
AGT	-0.535356	0.162476	0.209565
HIST1H1E	-0.760586	0.161218	0.208202
SELE	-1.86606	0.155357	0.200759
BCL11A	-1.02756	0.155315	0.200759
TOX	-1.00746	0.152764	0.197779
CD5	-1.43705	0.149216	0.193307
CISH	-0.864239	0.145827	0.189154
RGS13	-1.13209	0.145208	0.188495
ALOX5	-0.425462	0.144055	0.187207
BTLA	-1.95658	0.14255	0.185369
ADAMDEC1	-2.09521	0.142242	0.185202
CR2	-3.07174	0.142163	0.185202
MAP3K8	-0.394293	0.141116	0.183967
LINC00861	-1.47166	0.140533	0.183324
AURKB	-0.904143	0.138016	0.180153
FCRL2	-2.12153	0.137682	0.179831
LAX1	-2.37864	0.135755	0.177538
NGF	-1.19357	0.135674	0.177538
SNORD3D	-0.840728	0.135598	0.177538
PAX5	-2.65149	0.134647	0.176425
CRTAC1	-1.59886	0.132286	0.173662
SCML4	-1.35543	0.131307	0.172487
CCL8	-1.52047	0.131053	0.172263
EBI3	-1.80954	0.130621	0.171805
CNR1	-1.76014	0.129534	0.170483
CDA	-0.307892	0.129493	0.170483
GABRD	-1.1084	0.128146	0.168871
CX3CR1	-2.22452	0.128117	0.168871
NEIL1	-0.511553	0.127635	0.168413
KCTD12	-0.335422	0.127541	0.168396
ZBP1	-0.92549	0.125767	0.166161
CD28	-2.09651	0.123029	0.162751
SORBS2	-0.238315	0.120638	0.15969
C5orf38	-1.42111	0.119771	0.158645
SSUH2	-2.11612	0.119049	0.157789
TRIB3	-0.617033	0.118831	0.157602
TLR7	-2.25796	0.116405	0.154483
SMIM14	-0.15587	0.11423	0.151695
S100B	-1.0092	0.112292	0.149314
CCL7	-1.82049	0.111111	0.147838
TMIGD2	-1.87452	0.110953	0.147722
IL7R	-0.785564	0.109883	0.146392
HBA2	-0.606417	0.106436	0.142075
FOXF1	-0.629647	0.105948	0.141515
TESPA1	-1.81316	0.105586	0.141123
RETN	-0.944519	0.104515	0.139782
PRF1	-0.850633	0.10379	0.138993
STMN1	-0.209839	0.103231	0.138334
WFDC1	-0.896461	0.102338	0.137315
APOC2	-2.56347	0.101368	0.136103
LYVE1	-1.94201	0.100093	0.134565
GTSF1	-2.41552	0.0989591	0.133214
BMX	-1.09079	0.0987582	0.13303
IL2RA	-1.66707	0.0974059	0.13138
MUSTN1	-2.74058	0.0961114	0.129719
RBPMS2	-1.15294	0.0932168	0.126059
ITK	-1.37745	0.0929555	0.125788
FCRL5	-1.83547	0.0922541	0.124921
HSPA6	-0.69701	0.0899619	0.122057
IFI6	0.0572788	0.0895236	0.121543
LAT	-0.758627	0.0895139	0.121543
IL2RB	-1.41713	0.0884641	0.120342
TNFRSF18	-1.01641	0.0856648	0.116699
GPBAR1	-0.734061	0.0846366	0.115515
MAL	-2.31618	0.080693	0.110425
HIST2H2BE	-0.395738	0.0768242	0.10555
LRRC10B	-2.14212	0.0766503	0.105381
HIST1H1B	-2.45493	0.0753112	0.103678
HRC	-1.69711	0.0750577	0.103398
RIC3	-0.640853	0.0750369	0.103398
CCR2	-2.17799	0.0747894	0.103166
AFF3	-1.6929	0.0736516	0.101665
GPR18	-2.18902	0.073432	0.10143
PRKCQ-AS1	-1.45551	0.0723538	0.100007
CX3CL1	-0.381586	0.0707097	0.0979313
IL1B	-1.12797	0.070476	0.0976731
KLRG1	-1.37972	0.0686887	0.095324
FPR2	-2.36342	0.0682027	0.0947133
CDK1	-0.892938	0.0668101	0.0929043
CXCR5	-2.62546	0.0655913	0.0913325
LPL	-0.813266	0.0653149	0.091009
CASQ2	-2.78495	0.0651968	0.0909057
SEPT4	-0.538798	0.0625485	0.087272
OXNAD1	-0.745136	0.0617255	0.0862403
CR1	-2.90252	0.0606871	0.0848468
LPAR5	-0.765456	0.0555498	0.0778753
CENPM	-0.824846	0.0553815	0.0776921
GCSAM	-2.77895	0.0553534	0.0776921
SNX29P2	-0.792337	0.0519397	0.0730623
SSTR2	-1.83674	0.0509822	0.0718133
SIGLEC1	-1.21812	0.0505352	0.0712323
SLAMF7	-1.19876	0.050498	0.0712283
PPM1K	-0.550694	0.0496351	0.0700591
CCR5	-1.68048	0.0495491	0.0700334
RGL4	-1.70968	0.0463978	0.0657143
MOCS1	-0.822153	0.0462919	0.0656093
PKIB	-0.525094	0.0461572	0.0654633
TNFRSF17	-2.3761	0.0449712	0.063869
FOXS1	-0.552069	0.0433876	0.0617899
TNFRSF13B	-2.15981	0.0431774	0.0615755
TBX2	-0.622299	0.0431413	0.0615665
KIF20B	-0.647489	0.042481	0.0606662
SH2D1A	-1.39514	0.0421906	0.0602931
CCL3L1	-2.08813	0.0421888	0.0602931
TNFRSF25	-0.716831	0.0417356	0.0597669
CD163L1	-1.07765	0.0410929	0.0589283
COLEC11	-0.71055	0.0408444	0.0586127
CMC1	-0.242003	0.04024	0.0577855
LY6K	-0.824019	0.0397893	0.057178
SCN3A	-2.60282	0.039763	0.057178
LILRA5	-3.55768	0.0386842	0.0557842
ITGA8	-1.55536	0.0379164	0.0547152
SLC7A5	-0.610726	0.037361	0.0539514
MTUS1	-0.262367	0.0372522	0.053832
ORAI2	-0.584897	0.0368149	0.0532373
KCNE1	-2.79251	0.0364364	0.0527268
C16orf54	-1.67111	0.0361138	0.0523334
DENND2D	-0.528398	0.0347027	0.0503238
MATK	-1.56442	0.0346593	0.0502962
MZB1	-0.993598	0.0345994	0.0502446
STAG3	-1.48594	0.0333647	0.0485197
P2RY10	-2.19478	0.0329813	0.0480638
CD1E	-1.95329	0.0325654	0.0474912
FABP1	-1.12229	0.0320115	0.0467495
ASB9	-1.23792	0.0317405	0.0464193
RAB33A	-1.57085	0.0316774	0.0463599
CLEC2D	-0.982532	0.0314461	0.0460868
PTPRM	-0.571421	0.0314038	0.0460574
IL16	-0.939228	0.0313363	0.0459911
TNFAIP3	-0.413821	0.0306854	0.0450998
FCER2	-2.14646	0.0294495	0.0433761
SIRPG	-1.91178	0.0275709	0.0408128
ASB2	-2.54222	0.0274148	0.0406109
IFIT2	-0.591107	0.0273091	0.0404833
FCER1A	-1.66914	0.0263522	0.0391209
NTRK2	-0.680241	0.0261246	0.038811
GZMM	-1.19012	0.0256558	0.038197
SNAI1	-0.808825	0.0253694	0.0377978
FOLR2	-1.80397	0.0241747	0.0360438
PRDM1	-0.523142	0.0237946	0.0355284
KCNA5	-2.45458	0.0231926	0.0346797
NCR3	-2.04634	0.0227437	0.0340877
NRIP2	-1.75629	0.0225794	0.0338855
PTGS1	-1.01391	0.0224415	0.0337031
CXCR3	-1.43458	0.0219477	0.0329854
WDFY4	-1.92238	0.0214706	0.0322919
F8	-0.917623	0.0210904	0.0317663
CD40LG	-2.2399	0.0200412	0.0302522
SPIB	-1.15628	0.01991	0.0300762
PIK3CG	-2.07649	0.0189439	0.0286588
RFTN1	-0.592803	0.0188344	0.028514
GGA2	-0.588085	0.0186079	0.0281918
OR51E1	-1.91182	0.0184385	0.0279557
LIMCH1	-0.513836	0.0182871	0.0277464
GRAP2	-1.55315	0.0182711	0.0277425
SOCS1	-0.682123	0.0177218	0.0269482
P2RY13	-2.07741	0.0175149	0.0266531
CCL2	-0.300851	0.0172365	0.0262876
SKAP1	-0.857713	0.0166711	0.0254441
HERC5	-0.71073	0.0165813	0.0253257
PYHIN1	-1.72164	0.0162318	0.0248103
CCL23	-2.04796	0.0162274	0.0248103
CEACAM4	-1.86893	0.0162185	0.0248103
RNU12	-0.823345	0.0155035	0.0237498
GBP5	-1.25382	0.0146862	0.0225145
SIPA1L2	-0.564393	0.0144081	0.0221045
ATP1B2	-1.67377	0.0127823	0.0196834
LDB3	-2.4288	0.0123589	0.0190599
CD300E	-1.82045	0.0119883	0.0185298
CYTL1	-2.01962	0.0119412	0.0184708
EREG	-0.925014	0.0114511	0.0177393
MEI1	-1.40629	0.0112455	0.0174339
ENPP2	-0.863823	0.0109881	0.0170477
CD96	-1.12214	0.010721	0.0166458
DNASE1L3	-2.53959	0.010702	0.0166288
MADCAM1	-1.85813	0.0106497	0.0165599
SLAMF1	-1.76517	0.010367	0.0161325
STAP1	-3.04168	0.0103066	0.0160506
STC2	-1.06289	0.0101673	0.0158457
GZMB	-0.745288	0.00997644	0.0155599
MIR155HG	-1.11305	0.00978168	0.0152792
OSM	-1.77766	0.0097364	0.01522
DUSP2	-0.768834	0.00954877	0.0149494
ICAM1	-0.422408	0.00944472	0.0147977
TMEM154	-0.685713	0.00939994	0.0147387
MMRN1	-2.41754	0.00914407	0.0143702
LIMS2	-0.678568	0.00912875	0.0143571
SERPINI1	-0.760224	0.00899244	0.0141643
GJA5	-1.81669	0.00881158	0.01389
COL13A1	-1.48988	0.00858242	0.0135495
NLRP3	-1.66608	0.0082834	0.0130974
SPRY1	-0.547227	0.00811181	0.0128359
CHI3L2	-1.62379	0.00786337	0.0124523
S100A12	-2.19668	0.00779053	0.0123465
MAP1B	-0.402919	0.00744319	0.0118051
MRC1	-2.8121	0.00741419	0.0117681
LY9	-2.46854	0.0074111	0.0117681
DLL1	-0.8889	0.00708478	0.0112799
TNFSF13B	-0.551636	0.00706703	0.0112604
FGD2	-0.964236	0.00684108	0.0109256
LINC01094	-2.39519	0.00680278	0.0108729
BDKRB2	-0.899756	0.0061136	0.00980169
CXCL13	-1.16276	0.00578409	0.00928782
ZAP70	-1.39976	0.00552649	0.00891579
VMO1	-1.21264	0.00550204	0.00888328
TMC8	-0.854473	0.00534395	0.00863478
CD300LF	-1.63661	0.00521087	0.00843295
SLC1A3	-0.902571	0.00512756	0.00831115
STAT4	-1.59231	0.00480438	0.0078057
BCL2	-1.12751	0.00477048	0.00775673
TIGIT	-1.4944	0.004409	0.00718027
GPAT2	-1.00243	0.00413921	0.00675156
LEPR	-0.659315	0.00405181	0.00661422
GPR20	-3.48848	0.00384997	0.00628971
C2orf40	-0.993577	0.0036305	0.00594527
COL4A1	-0.29438	0.00345098	0.00566476
APOBR	-1.46822	0.0034476	0.00566372
SNCA	-1.05488	0.00342157	0.00562542
CD6	-1.49485	0.00329693	0.00542915
SGCA	-1.13266	0.00287193	0.00475202
IL12RB1	-2.1671	0.00271055	0.00449581
HEY1	-0.979253	0.00250299	0.00416492
MX1	-0.32122	0.00232875	0.00388126
SYNM	-1.3737	0.00188422	0.00315053
PSTPIP1	-1.22528	0.00182223	0.00305183
MT1A	-0.814609	0.00181954	0.00304979
BIRC3	-0.307512	0.00171896	0.00288824
NKG7	-0.688585	0.00171401	0.00288227
TLR10	-3.09572	0.00171086	0.00287932
HBB	-0.673544	0.00168658	0.00284077
DUSP6	-0.33878	0.00162949	0.00274909
PTPN22	-1.12891	0.00151512	0.00256663
ITGAL	-1.57894	0.00144122	0.00244545
NKX2-3	-1.29765	0.00136803	0.00232509
CPNE5	-1.92388	0.00124914	0.00212652
BCAS4	-0.977765	0.00123503	0.00210425
OGFRL1	-0.658876	0.00119797	0.00204278
RNASE1	-0.286297	0.0011743	0.00200407
KLRB1	-1.1163	0.00113824	0.00194414
CCL20	-0.628547	0.00105107	0.00180121
GATA2	-1.62493	0.000971492	0.00166622
TRAT1	-2.37779	0.000968449	0.00166238
CCL5	-0.592138	0.000968338	0.00166238
OTOA	-2.71008	0.000960197	0.00165096
FAM129A	-0.724546	0.000914807	0.00157554
TSPAN18	-1.30448	0.000907258	0.00156385
SELPLG	-0.808646	0.000881858	0.00152133
SNHG15	-0.490541	0.000855557	0.00147719
RASD1	-0.790579	0.000845533	0.00146233
CD1C	-1.94474	0.000837307	0.00144932
EFNB2	-0.500989	0.00083305	0.00144316
SEMA3G	-2.55854	0.000808423	0.00140167
CD247	-1.29261	0.000746134	0.00129585
CCR6	-2.00928	0.000743674	0.00129267
ARL15	-0.903013	0.000691948	0.0012058
DENND1C	-1.92019	0.000688666	0.00120192
SLC15A3	-0.698707	0.000685691	0.00119996
SELP	-2.08178	0.000635523	0.00111405
BATF	-0.686626	0.000604832	0.00106206
AOC3	-0.682248	0.000602201	0.00105834
TREM1	-1.16549	0.00056869	0.00100029
PIM2	-1.07858	0.000562077	0.000989505
FRMD3	-1.20342	0.000560446	0.000987476
ADRB2	-2.11074	0.000549243	0.000968563
MT1M	-0.451745	0.000536941	0.000947679
SLC9A3R2	-0.416556	0.000536131	0.000947057
BLK	-2.20261	0.000533164	0.000942624
GPIHBP1	-2.67812	0.000520693	0.000923738
LTC4S	-0.826493	0.000514093	0.000912813
P2RX5	-1.98978	0.000470485	0.000836823
NOV	-1.05651	0.000456504	0.000813356
RASSF5	-0.723135	0.000427915	0.000763737
CHST2	-1.54202	0.000421967	0.000755079
DAPP1	-0.799242	0.000407595	0.000730628
HRH2	-2.27996	0.000397693	0.00071474
NR4A2	-0.524842	0.000389502	0.000700628
SLC31A2	-0.858101	0.000376216	0.00067732
PARM1	-0.7188	0.000354411	0.000639177
SLC14A1	-1.26368	0.000339153	0.000612195
ADCY3	-0.711733	0.000333823	0.000603101
AQP9	-2.6159	0.000329763	0.00059681
LMNB1	-0.913195	0.000327449	0.000593142
KLF4	-0.33983	0.00032101	0.000582501
RNASE2	-2.67046	0.000297757	0.000540782
SLAMF8	-1.62669	0.000287937	0.000523407
ENPEP	-0.92141	0.00027889	0.000507856
POU2AF1	-1.64363	0.000259477	0.00047334
FCGR1B	-3.55071	0.000255657	0.000466783
OSCAR	-1.54051	0.000239171	0.000437843
GJC1	-0.858979	0.00018706	0.000344277
CTSW	-1.3934	0.000170457	0.000314001
CXorf21	-2.71072	0.000154439	0.000285512
CLEC12A	-1.59134	0.0001505	0.000278728
EPHA4	-0.927995	0.000144968	0.000268966
NFASC	-1.21332	0.000140285	0.000260512
GPR171	-1.75264	0.000135175	0.000251249
ANGPT2	-0.764231	0.000130348	0.000242495
AOAH	-1.78282	0.000128524	0.000239533
LYAR	-0.60892	0.000123086	0.000229604
BTG2	-0.316574	0.000119143	0.00022245
ITGB7	-1.56587	0.00011547	0.000215788
LILRB2	-2.34738	0.000104099	0.000194714
KCNN3	-2.03212	9.85115e-05	0.00018443
TCL1A	-1.78541	8.39521e-05	0.000157458
NEDD9	-0.502056	7.68839e-05	0.000144595
SDS	-2.18538	7.06385e-05	0.000133213
CLDN15	-0.598504	6.99855e-05	0.000132102
MAP4K1	-1.67723	6.98052e-05	0.000131883
EAF2	-1.21249	6.67187e-05	0.000126167
SYTL3	-1.53873	6.6067e-05	0.000125279
FHL5	-1.77685	6.33615e-05	0.000120259
NOSTRIN	-0.578626	4.1032e-05	7.80931e-05
MCM5	-0.930028	4.04769e-05	7.71077e-05
KCNK17	-1.93044	3.95762e-05	7.54615e-05
LILRB1	-3.03618	3.9396e-05	7.51874e-05
ITGAX	-1.41079	3.56797e-05	6.83475e-05
CFP	-2.65813	3.40727e-05	6.53297e-05
KCNMB1	-0.807801	3.18341e-05	6.10942e-05
HLA-DOB	-1.6243	3.14348e-05	6.0384e-05
P2RY8	-2.61777	3.13712e-05	6.0318e-05
RERGL	-2.33379	3.10333e-05	5.97238e-05
HIST1H1D	-1.34869	2.76423e-05	5.3347e-05
RUNX3	-1.60573	2.11734e-05	4.10546e-05
FCRLA	-2.42331	2.04041e-05	3.96372e-05
AIM2	-2.88816	2.00328e-05	3.89526e-05
NPL	-1.53176	1.97774e-05	3.84923e-05
EFHD1	-1.15559	1.88121e-05	3.66482e-05
ITGA7	-1.27273	1.87302e-05	3.65229e-05
AKNA	-0.910586	1.53637e-05	3.00152e-05
CNTRL	-0.861461	1.32808e-05	2.5995e-05
RAPGEF4	-1.52181	1.20015e-05	2.35357e-05
RGCC	-0.444646	1.17607e-05	2.30853e-05
ZNF331	-0.841331	1.06279e-05	2.09016e-05
ASGR1	-1.88229	1.05513e-05	2.07708e-05
CD72	-1.89313	9.36947e-06	1.84618e-05
CLEC3B	-2.36823	9.32722e-06	1.83961e-05
CLEC4E	-2.22695	8.38359e-06	1.65666e-05
STEAP4	-0.969312	8.38145e-06	1.65666e-05
CD22	-2.45638	6.73552e-06	1.33997e-05
CNTNAP3B	-1.89196	5.7694e-06	1.14998e-05
SNX20	-2.41908	5.16353e-06	1.03121e-05
CD19	-2.24109	4.83628e-06	9.68664e-06
SLC38A11	-1.51009	3.99585e-06	8.04232e-06
ITGAM	-1.39533	3.97089e-06	8.00771e-06
KPNA2	-0.708273	3.86597e-06	7.81137e-06
LGI4	-1.50758	3.82482e-06	7.73581e-06
LRRC25	-2.45662	3.81242e-06	7.71829e-06
C1QB	-0.988532	3.49447e-06	7.08153e-06
MARCO	-1.91042	3.29526e-06	6.68438e-06
HMOX1	-0.996885	3.26988e-06	6.63943e-06
CD180	-3.35021	2.6398e-06	5.38656e-06
ITGA4	-1.82035	2.4136e-06	4.93473e-06
CKS2	-0.511301	2.32622e-06	4.7608e-06
PRCP	-0.487027	2.10373e-06	4.314e-06
PLA2G7	-2.60905	1.9444e-06	3.99124e-06
RGS18	-3.61114	1.92285e-06	3.95093e-06
PDE4B	-1.4668	1.68614e-06	3.47493e-06
PCDH12	-2.51212	1.5177e-06	3.13405e-06
OLFM1	-1.28062	1.49519e-06	3.09066e-06
APLNR	-1.40149	1.14711e-06	2.38548e-06
TBXAS1	-0.944876	1.0662e-06	2.21946e-06
KLHL6	-1.96349	1.03082e-06	2.14797e-06
RBP5	-1.88244	1.0052e-06	2.09882e-06
BANK1	-1.48399	7.80897e-07	1.63877e-06
FAM162B	-1.50982	7.26241e-07	1.52718e-06
FCN3	-2.5197	7.08269e-07	1.4909e-06
PLD4	-2.15393	7.0228e-07	1.4798e-06
IL4I1	-1.91293	6.09879e-07	1.28905e-06
SIGLEC10	-2.17976	5.87559e-07	1.24698e-06
NRARP	-0.975244	4.6051e-07	9.79355e-07
DEF6	-1.06725	4.51434e-07	9.61043e-07
SNX10	-0.795435	4.47412e-07	9.53463e-07
MPEG1	-2.13348	4.32723e-07	9.23114e-07
CLEC10A	-2.54023	4.08059e-07	8.71397e-07
NRGN	-1.77103	4.01663e-07	8.58627e-07
CLEC4A	-1.80869	2.68888e-07	5.75989e-07
FCN1	-2.02062	2.53473e-07	5.43533e-07
PDGFB	-1.09572	2.40646e-07	5.16563e-07
CASKIN2	-1.03484	1.97273e-07	4.25673e-07
JAG2	-1.24663	1.96395e-07	4.24221e-07
LYZ	-0.168976	1.62661e-07	3.52091e-07
AIF1L	-1.72441	1.43437e-07	3.10804e-07
CTSL	-0.242046	1.25295e-07	2.72064e-07
C1QA	-0.986805	1.15896e-07	2.51922e-07
HBEGF	-0.731276	1.10982e-07	2.41748e-07
LRMP	-1.5719	1.02455e-07	2.23646e-07
ANKRD44	-1.21267	9.90893e-08	2.16529e-07
CLEC5A	-1.85857	8.56002e-08	1.8725e-07
HLA-DOA	-1.45975	8.26861e-08	1.81068e-07
TMEM156	-2.12113	8.13609e-08	1.78544e-07
TNXB	-1.1314	8.01594e-08	1.76095e-07
ACVRL1	-0.927202	7.81066e-08	1.71951e-07
C5AR1	-1.77744	6.40524e-08	1.41161e-07
PLCB1	-1.19317	5.20055e-08	1.15103e-07
TGFBR2	-0.4529	5.08047e-08	1.12566e-07
SLCO2B1	-1.34857	4.96764e-08	1.10195e-07
GK	-1.03363	4.68598e-08	1.04161e-07
CSF3R	-1.83251	4.42108e-08	9.83786e-08
TGFBR3	-1.04145	3.7201e-08	8.31386e-08
CCR7	-2.56392	3.58289e-08	8.02459e-08
LDB2	-1.00821	3.10593e-08	6.97147e-08
PNP	-0.682697	2.97194e-08	6.68524e-08
CCR1	-2.55759	2.50446e-08	5.63981e-08
ARHGAP9	-1.65226	2.37285e-08	5.34928e-08
S1PR4	-2.03897	2.2132e-08	5.00575e-08
CD38	-2.43955	2.1612e-08	4.89352e-08
SUSD3	-1.83118	2.09136e-08	4.74579e-08
RASA4	-1.2186	2.01809e-08	4.58959e-08
RHOJ	-1.33774	1.77246e-08	4.03988e-08
GNG11	-0.342379	1.55231e-08	3.54592e-08
RASGRP2	-1.22167	1.50708e-08	3.44642e-08
CD1D	-2.59224	1.38726e-08	3.17593e-08
RCAN2	-1.0934	1.3345e-08	3.05854e-08
GPR34	-2.31425	1.21933e-08	2.7977e-08
OLFML2A	-1.04975	1.13829e-08	2.61466e-08
DOCK2	-1.76301	1.13606e-08	2.61243e-08
TLR2	-1.34779	9.77843e-09	2.25362e-08
LIFR	-1.28166	9.16178e-09	2.11386e-08
GBP4	-0.772427	8.79219e-09	2.03541e-08
GNG7	-1.17271	7.23211e-09	1.68369e-08
FPR3	-2.18588	6.63675e-09	1.54857e-08
CLECL1	-2.78856	6.58036e-09	1.53715e-08
NOS3	-2.30081	6.4385e-09	1.50572e-08
RASSF4	-0.765639	6.40021e-09	1.49846e-08
HIGD1B	-1.15107	5.83808e-09	1.3684e-08
ATOH8	-2.51526	5.35583e-09	1.25679e-08
GAPT	-2.6868	5.2681e-09	1.23761e-08
PAG1	-0.867962	4.62826e-09	1.08854e-08
PPP1R14A	-0.74468	4.54672e-09	1.07058e-08
SPN	-2.06598	4.54496e-09	1.07058e-08
IL33	-1.51356	4.544e-09	1.07058e-08
DLL4	-3.01672	4.30259e-09	1.0189e-08
CD7	-1.25047	3.5755e-09	8.48666e-09
CD3G	-1.92068	3.40245e-09	8.10388e-09
SOD3	-0.639177	3.34418e-09	7.97429e-09
GPR65	-1.94308	3.1661e-09	7.55838e-09
TMEM107	-0.798553	2.9475e-09	7.05282e-09
NDUFA4L2	-0.818917	2.85511e-09	6.83968e-09
FZD4	-1.36217	2.29164e-09	5.49621e-09
SERPINB9	-1.0069	2.14349e-09	5.15286e-09
CPVL	-1.27	2.04129e-09	4.9129e-09
NEURL1B	-1.00758	2.00866e-09	4.84e-09
KYNU	-0.93702	2.00244e-09	4.83065e-09
LCK	-1.31936	1.98701e-09	4.79903e-09
NDRG1	-0.414154	1.58262e-09	3.8358e-09
[truncated: 329 more rows]
