# Supplementary material for: SIDISH Identifies High-Risk Disease-Associated Cells and Biomarkers by Integrating Single-Cell Depth and Bulk Breadth
Source: Research Square preprint supplement (doi:10.21203/rs.3.rs-5921999/v1), 2025-03-10
Supplement: Supplementary file 8 [file f2e12d280a64e5acadaa9250.xlsx]

## Sheet: Description
Descriptions:
1. Labeled cells: Predicted risk scores and SIDISH labels for LUAD cells .
2. Differential expression genes: All the differentially expressed genes between High-Risk cells and Background cells with an adjusted P value < 0.05. The log Fold change was calculated using a two-tailed Wilcoxon rank sum test.
3. SIDISH marker genes: List of genes that were upregulated in the High-Risk cells.

## Sheet: 1.Labeled cells
	risk_value	SIDISH label
AAACCTGAGACTACAA_15	0.0121341	Background
AAACCTGAGACTTGAA_20	-0.545835	Background
AAACCTGAGCGCCTTG_15	0.490999	Background
AAACCTGCAGCTATTG_19	0.168064	Background
AAACCTGCAGTAAGCG_15	-0.0479963	Background
AAACCTGGTGGCGAAT_20	0.109315	Background
AAACCTGTCACCGGGT_20	0.391598	Background
AAACGGGAGCAGACTG_19	0.318449	Background
AAACGGGAGTCCATAC_19	0.151548	Background
AAACGGGAGTGCCATT_14	-0.153264	Background
AAACGGGCACTGCCAG_15	0.436537	Background
AAACGGGGTACGACCC_19	0.301001	Background
AAACGGGGTATATGGA_19	-0.351185	Background
AAACGGGTCACATACG_19	-0.638482	Background
AAACGGGTCTCGCTTG_14	-0.0667312	Background
AAACGGGTCTGCTGTC_20	0.0598808	Background
AAAGATGAGACTGGGT_19	-0.401609	Background
AAAGATGAGTGGGATC_19	0.0362849	Background
AAAGATGCACAGGCCT_19	-0.0680126	Background
AAAGATGGTTTGTTGG_20	0.181949	Background
AAAGCAAAGCTGTCTA_19	0.353247	Background
AAAGCAAAGGCTCATT_19	-0.15156	Background
AAAGCAACACCACCAG_16	0.0401887	Background
AAAGCAACATCGGGTC_15	-0.17553	Background
AAAGCAACATCGGTTA_20	0.402151	Background
AAAGCAAGTACATGTC_20	0.282187	Background
AAAGCAAGTTCGAATC_14	0.183723	Background
AAAGCAATCAACGAAA_15	0.534126	Background
AAAGTAGAGAATTGTG_20	0.307753	Background
AAAGTAGAGGAGCGAG_19	-0.0775494	Background
AAAGTAGAGTCAAGCG_20	-0.351868	Background
AAAGTAGAGTCCATAC_14	-0.192794	Background
AAAGTAGAGTCCATAC_15	-0.388828	Background
AAAGTAGCAACTGCTA_18	0.221349	Background
AAAGTAGCAAGCCTAT_19	-0.0331476	Background
AAAGTAGGTAAGTTCC_20	0.217391	Background
AAAGTAGGTCTAAACC_19	-0.258972	Background
AAAGTAGGTGTATGGG_18	-0.207434	Background
AAAGTAGTCATACGGT_18	0.118668	Background
AAAGTAGTCCACGACG_19	-0.182636	Background
AAAGTAGTCCCTAATT_14	-0.479054	Background
AAATGCCAGGACATTA_20	0.0463707	Background
AAATGCCCAAATACAG_15	-0.215696	Background
AAATGCCCACGTCAGC_13	-0.241916	Background
AAATGCCGTAGTAGTA_15	0.499811	Background
AAATGCCGTTGGAGGT_18	0.183932	Background
AAATGCCTCAACGGGA_19	0.0615419	Background
AAATGCCTCAGTGTTG_18	-0.227555	Background
AAATGCCTCATATCGG_20	0.332535	Background
AAATGCCTCCCGACTT_19	0.169814	Background
AAATGCCTCCCTGACT_20	0.211181	Background
AACACGTAGCTGAAAT_20	0.546925	Background
AACACGTAGTAGGTGC_14	0.0966941	Background
AACACGTCAACGCACC_19	-0.0919384	Background
AACACGTCACATGGGA_15	0.108045	Background
AACACGTCACGTCAGC_20	0.226923	Background
AACACGTCAGTATAAG_14	-0.466241	Background
AACACGTGTACAGTTC_20	0.309774	Background
AACACGTGTCCGTGAC_19	-0.293375	Background
AACACGTGTCTAACGT_19	0.132683	Background
AACACGTGTGATAAAC_15	-0.139598	Background
AACACGTTCAGCAACT_18	0.217445	Background
AACACGTTCGTACCGG_15	0.0583273	Background
AACACGTTCTCGTTTA_15	-0.114382	Background
AACCATGCATCTCCCA_19	-0.446567	Background
AACCATGTCACGATGT_13	0.157039	Background
AACCATGTCACGATGT_14	0.426618	Background
AACCATGTCTTAGCCC_14	-0.00708627	Background
AACCATGTCTTAGCCC_15	0.0682541	Background
AACCGCGAGCTGCGAA_20	-0.0674612	Background
AACCGCGAGGACTGGT_18	0.584767	High-Risk
AACCGCGGTACCGTAT_15	0.244288	Background
AACCGCGGTGACGGTA_14	-0.377531	Background
AACCGCGTCCTCGCAT_19	0.186089	Background
AACGTTGAGACGACGT_20	0.341493	Background
AACGTTGAGATATACG_19	0.0785692	Background
AACGTTGAGCTTCGCG_19	-0.0917811	Background
AACGTTGAGTATGACA_19	0.232464	Background
AACGTTGAGTGTGAAT_19	-0.0355691	Background
AACGTTGAGTTGAGAT_20	0.16729	Background
AACGTTGCAACCGCCA_19	0.390117	Background
AACGTTGCAAGCCCAC_14	-0.064111	Background
AACGTTGCAAGCCCAC_16	-0.22141	Background
AACGTTGCAAGGTTTC_20	0.0449991	Background
AACGTTGCAATGTAAG_18	-0.0592147	Background
AACGTTGCATTGGTAC_20	0.326391	Background
AACGTTGTCGAATCCA_20	0.370271	Background
AACTCAGAGAGTTGGC_20	0.504411	Background
AACTCAGAGCAGACTG_13	-0.199249	Background
AACTCAGAGCAGACTG_14	-0.356136	Background
AACTCAGAGGGTGTTG_13	-0.00649101	Background
AACTCAGCAAGGTTTC_15	0.186852	Background
AACTCAGCACGAAACG_20	0.147699	Background
AACTCAGCATGGTTGT_19	0.250046	Background
AACTCAGCATTCGACA_13	0.0636952	Background
AACTCAGGTGGTCCGT_20	0.359728	Background
AACTCAGGTTCGGCAC_19	-0.285793	Background
AACTCAGGTTCGTCTC_13	-0.23262	Background
AACTCAGGTTCGTCTC_14	-0.190806	Background
AACTCAGTCAGGATCT_13	0.0984227	Background
AACTCAGTCCGCGGTA_19	-0.208984	Background
AACTCAGTCGAACTGT_16	0.355614	Background
AACTCAGTCGGTCCGA_18	-0.671394	Background
AACTCCCAGCGCCTTG_19	0.335394	Background
AACTCCCAGCTAGTCT_14	-0.429617	Background
AACTCCCAGCTCCCAG_14	0.517004	Background
AACTCCCAGGGTATCG_19	0.0294043	Background
AACTCCCCACCCAGTG_15	0.465406	Background
AACTCCCCATATACCG_15	0.469241	Background
AACTCCCGTAATAGCA_20	-0.418785	Background
AACTCCCGTAGCGCAA_20	0.37722	Background
AACTCCCGTCAACTGT_20	0.256418	Background
AACTCCCGTCAGGACA_19	0.100448	Background
AACTCCCTCCAGGGCT_20	0.183069	Background
AACTCCCTCTCTTATG_15	0.119985	Background
AACTCCCTCTGGTGTA_14	0.0945553	Background
AACTCTTAGAAACCGC_15	0.133297	Background
AACTCTTAGAAACCGC_16	0.157817	Background
AACTCTTCACACCGAC_18	0.154086	Background
AACTCTTCATAACCTG_20	0.376275	Background
AACTCTTGTCCAGTGC_19	0.133283	Background
AACTCTTTCATAGCAC_18	0.575081	High-Risk
AACTCTTTCGAACTGT_20	0.159323	Background
AACTGGTAGCGTCTAT_20	0.182331	Background
AACTGGTAGGTGCAAC_20	0.493252	Background
AACTGGTAGTAGATGT_19	-0.157724	Background
AACTGGTAGTAGGCCA_20	0.355461	Background
AACTGGTCATTGGTAC_19	0.580751	High-Risk
AACTGGTGTCAGTGGA_15	-0.153338	Background
AACTGGTTCACATACG_19	0.042756	Background
AACTGGTTCGGAGCAA_14	-0.5931	Background
AACTTTCAGCTAACAA_19	0.132032	Background
AACTTTCAGTGGACGT_20	0.406125	Background
AACTTTCTCCTAGAAC_20	0.302516	Background
AACTTTCTCTTGTATC_15	-0.153268	Background
AAGACCTAGCGTTGCC_19	-0.482608	Background
AAGACCTAGCTGCAAG_20	0.195938	Background
AAGACCTCACCCTATC_20	0.16486	Background
AAGACCTTCAAAGACA_20	-0.604749	Background
AAGACCTTCGCAGGCT_13	-0.477499	Background
AAGACCTTCGCAGGCT_14	-0.638301	Background
AAGACCTTCTGAGTGT_14	-0.3669	Background
AAGCCGCAGTTTAGGA_20	0.185594	Background
AAGCCGCCACTTAAGC_20	0.015427	Background
AAGCCGCGTTGGTAAA_14	-0.439951	Background
AAGCCGCGTTGTGGCC_13	-0.316938	Background
AAGCCGCGTTGTGGCC_14	-0.164686	Background
AAGCCGCTCCACGTTC_19	-0.40243	Background
AAGCCGCTCCGCGTTT_19	-0.00337782	Background
AAGCCGCTCGCGCCAA_19	-0.398944	Background
AAGCCGCTCTGCGGCA_20	0.113125	Background
AAGGAGCCAATGGACG_19	0.681024	High-Risk
AAGGAGCGTCAGCTAT_13	-0.454812	Background
AAGGAGCGTCCTAGCG_20	0.345445	Background
AAGGAGCGTTAAGATG_19	0.374508	Background
AAGGAGCGTTATCGGT_13	-0.398067	Background
AAGGAGCGTTATCGGT_14	-0.165606	Background
AAGGAGCTCACGCGGT_19	0.532412	Background
AAGGAGCTCAGCTTAG_15	-0.506796	Background
AAGGAGCTCGGTTCGG_14	-0.136056	Background
AAGGAGCTCTACCTGC_20	0.465616	Background
AAGGCAGAGGGTATCG_15	-0.34379	Background
AAGGCAGAGTACGCGA_20	-0.0977101	Background
AAGGCAGCATGCCTAA_20	0.192397	Background
AAGGCAGCATGGTTGT_19	0.245535	Background
AAGGCAGGTCCAACTA_20	0.361808	Background
AAGGCAGGTGCTGTAT_20	-0.101295	Background
AAGGCAGGTGGTACAG_15	0.135687	Background
AAGGCAGGTTATGTGC_20	0.237477	Background
AAGGCAGTCAACACCA_16	-0.150138	Background
AAGGTTCAGCTAGTTC_13	-0.0758882	Background
AAGGTTCCACAGACAG_20	0.568866	High-Risk
AAGGTTCCACAGAGGT_19	-0.57689	Background
AAGGTTCCACGGTAAG_20	0.153089	Background
AAGGTTCGTCCGAGTC_20	0.166001	Background
AAGGTTCGTGAGCGAT_19	0.215341	Background
AAGTCTGAGAGGACGG_20	0.358848	Background
AAGTCTGAGATATGGT_20	-0.140612	Background
AAGTCTGAGCTAGTTC_15	0.402995	Background
AAGTCTGAGGTAGCCA_19	0.465862	Background
AAGTCTGCACGAGAGT_13	-0.516523	Background
AAGTCTGCAGTCCTTC_20	0.234011	Background
AAGTCTGCATAGGATA_19	-0.0528275	Background
AAGTCTGTCCCGGATG_13	-0.275002	Background
AAGTCTGTCCCGGATG_14	-0.20474	Background
AAGTCTGTCTCGTTTA_14	0.289068	Background
AATCCAGAGCGAAGGG_14	-0.18426	Background
AATCCAGAGGCCATAG_18	0.518081	Background
AATCCAGCAACAACCT_18	-0.0361666	Background
AATCCAGCAGACAGGT_20	0.0489274	Background
AATCCAGGTTAAGGGC_19	0.244488	Background
AATCCAGTCTGTCCGT_20	0.460266	Background
AATCGGTAGCAAATCA_14	-0.548673	Background
AATCGGTAGCTGCCCA_15	-0.601341	Background
AATCGGTCAGGGTACA_15	0.361749	Background
AATCGGTCAGTAGAGC_15	-0.0874039	Background
AATCGGTTCAGTTAGC_14	0.209093	Background
AATCGGTTCAGTTAGC_15	0.2693	Background
AATCGGTTCGAGCCCA_18	-0.0919873	Background
AATCGGTTCGGGAGTA_19	-0.456466	Background
AATCGGTTCTCGCTTG_20	-0.209194	Background
ACACCAAAGCGATTCT_15	0.490672	Background
ACACCAACAAGCCCAC_20	0.28468	Background
ACACCAACACTAGTAC_18	-0.444476	Background
ACACCAACAGACGCCT_19	-0.548444	Background
ACACCAAGTGCACGAA_20	0.464952	Background
ACACCAATCATAGCAC_18	0.010342	Background
ACACCAATCTACCTGC_15	-0.15607	Background
ACACCCTAGAATCTCC_13	0.0927056	Background
ACACCCTCATCAGTCA_13	-0.487021	Background
ACACCCTCATGATCCA_19	0.13435	Background
ACACCCTCATGTAGTC_15	0.550674	Background
ACACCCTGTCCATCCT_20	0.163114	Background
ACACCCTGTTGCTCCT_15	0.470877	Background
ACACCCTTCAAACCAC_14	-0.556689	Background
ACACCCTTCAGAGGTG_19	-0.471354	Background
ACACCCTTCCAAATGC_20	-0.189375	Background
ACACCCTTCTCTGCTG_14	-0.0623779	Background
ACACCGGAGCTGTTCA_18	0.31057	Background
ACACCGGCAGGCTCAC_20	0.49473	Background
ACACCGGGTACAAGTA_20	0.102939	Background
ACACTGAAGAACTGTA_20	0.280121	Background
ACACTGAAGACTAAGT_20	-0.40477	Background
ACACTGAAGCCATCGC_13	-0.137049	Background
ACACTGAAGCCATCGC_14	0.0913947	Background
ACACTGAAGCGCTCCA_20	0.244919	Background
ACACTGAAGCGTCTAT_20	0.103862	Background
ACACTGAAGGAATTAC_19	0.211702	Background
ACACTGAAGGTACTCT_20	0.503844	Background
ACACTGACACCCATTC_19	-0.661735	Background
ACACTGACATCACAAC_19	-0.501702	Background
ACACTGACATCGGAAG_20	0.30649	Background
ACACTGAGTAGCCTAT_18	-0.499596	Background
ACACTGATCACCCTCA_16	-0.162714	Background
ACACTGATCAGTTAGC_19	-0.0627318	Background
ACAGCCGAGAAACCAT_15	-0.0935214	Background
ACAGCCGAGAATTCCC_15	0.0364145	Background
ACAGCCGAGGCCCGTT_15	-0.244081	Background
ACAGCCGCACAGACTT_18	0.373816	Background
ACAGCCGCACGTTGGC_19	-0.259508	Background
ACAGCCGCATGTTGAC_15	0.409553	Background
ACAGCCGGTAAACCTC_19	-0.127988	Background
ACAGCCGGTTGCGCAC_15	0.266425	Background
ACAGCCGTCATTATCC_20	0.218896	Background
ACAGCTAAGATGAGAG_15	0.0208325	Background
ACAGCTAAGATTACCC_20	-0.533955	Background
ACAGCTAAGCTCCTTC_20	0.457374	Background
ACAGCTAAGTGTTGAA_19	-0.660042	Background
ACAGCTACACAGCCCA_13	0.00323139	Background
ACAGCTACACAGCCCA_14	0.0505443	Background
ACAGCTACATAGTAAG_20	0.0261918	Background
ACAGCTACATTGCGGC_20	0.359428	Background
ACAGCTAGTTGAGGTG_15	0.302238	Background
ACAGCTATCCAGAAGG_19	0.326214	Background
ACAGCTATCCTCCTAG_19	-0.346847	Background
ACAGCTATCGACAGCC_20	0.056139	Background
ACAGCTATCGTTGACA_14	-0.543719	Background
ACAGCTATCTCAACTT_19	0.273363	Background
ACAGCTATCTGATACG_20	-0.11478	Background
ACAGCTATCTTAACCT_20	-0.169902	Background
ACAGCTATCTTCTGGC_20	0.258573	Background
ACATACGAGCGATATA_14	0.0962129	Background
ACATACGAGGACTGGT_14	0.0752732	Background
ACATACGAGGAGTCTG_15	0.368052	Background
ACATACGAGGGTTTCT_20	0.325574	Background
ACATACGAGTTAGGTA_18	0.312318	Background
ACATACGCACGACGAA_20	0.194964	Background
ACATACGGTACTTCTT_20	0.0414153	Background
ACATACGGTCTAGTGT_19	-0.486725	Background
ACATACGGTCTGCGGT_19	-0.0341226	Background
ACATACGGTCTTCGTC_20	0.242002	Background
ACATACGTCGTTGACA_20	0.521599	Background
ACATCAGAGTACATGA_20	0.173221	Background
ACATCAGCAGCCAGAA_20	0.352709	Background
ACATCAGCATCATCCC_13	-0.116366	Background
ACATGGTAGCTAGCCC_14	-0.208939	Background
ACATGGTAGGGTTTCT_19	0.386986	Background
ACATGGTAGTAGGCCA_20	0.349366	Background
ACATGGTAGTTTGCGT_20	0.760206	High-Risk
ACATGGTGTCGGATCC_15	-0.36898	Background
ACATGGTGTGGTGTAG_14	-0.170008	Background
ACATGGTTCTGTCTAT_19	0.350321	Background
ACCAGTAAGACTTGAA_20	0.171306	Background
ACCAGTAAGAGTACAT_19	-0.00201417	Background
ACCAGTAAGGTAAACT_20	0.442248	Background
ACCAGTAAGTTACGGG_20	0.509585	Background
ACCAGTACAATGGAGC_18	0.174934	Background
ACCAGTACAGGGTATG_13	-0.296648	Background
ACCAGTATCGTAGATC_13	0.515999	Background
ACCCACTAGGTAGCTG_19	-0.0452033	Background
ACCCACTAGTCAATAG_19	0.229093	Background
ACCCACTCAGTGACAG_19	0.00197323	Background
ACCCACTCATGGGACA_19	-0.521902	Background
ACCCACTGTAATTGGA_19	-0.459877	Background
ACCCACTGTCCGTGAC_14	0.451581	Background
ACCCACTGTTCAGGCC_13	-0.246324	Background
ACCCACTTCCACGACG_15	-0.372873	Background
ACCCACTTCCTGCTTG_20	0.172502	Background
ACCGTAAAGGCTAGAC_20	0.320091	Background
ACCGTAAAGTAGTGCG_14	-0.0684347	Background
ACCGTAAAGTGGAGAA_19	0.338082	Background
ACCGTAACACGGCCAT_14	-0.148023	Background
ACCGTAAGTTGTACAC_13	0.233587	Background
ACCGTAAGTTGTACAC_14	0.395115	Background
ACCGTAAGTTTGCATG_18	-0.154854	Background
ACCGTAATCACCCTCA_19	0.06482	Background
ACCGTAATCAGCTCGG_20	0.210796	Background
ACCGTAATCATAGCAC_20	-0.072467	Background
ACCTTTAAGACGCAAC_20	-0.344608	Background
ACCTTTAAGGTGTTAA_19	0.132208	Background
ACCTTTACAAGCGCTC_15	0.428743	Background
ACCTTTACACAACGCC_19	-0.606025	Background
ACCTTTACAGCATACT_20	-0.146298	Background
ACCTTTAGTGGTTTCA_20	-0.01384	Background
ACGAGCCCAACACCTA_20	0.143721	Background
ACGAGCCGTCAGCTAT_15	0.0342835	Background
ACGAGCCGTCTAGGTT_19	0.0473268	Background
ACGAGCCTCCTTGACC_20	-0.00143363	Background
ACGAGGAAGAGTAAGG_20	0.260645	Background
ACGAGGAAGTGGAGTC_20	-0.0425654	Background
ACGAGGACAAGCCATT_20	0.530243	Background
ACGAGGACACCAGGCT_20	0.350921	Background
ACGAGGACAGTAAGAT_15	0.312062	Background
ACGAGGACATTGGTAC_18	0.0234154	Background
ACGAGGAGTCAATGTC_20	0.217333	Background
ACGAGGATCCCATTAT_20	0.247678	Background
ACGAGGATCCTGCTTG_19	-0.416957	Background
ACGATACAGTCCGTAT_20	0.260914	Background
ACGATACCATATACGC_20	0.158674	Background
ACGATACGTAAGGATT_19	0.323952	Background
ACGATACGTAATCGTC_19	0.368067	Background
ACGATACGTCAGGACA_19	0.0434806	Background
ACGATACGTCCTCTTG_20	0.126485	Background
ACGATACGTTATGCGT_14	-0.013306	Background
ACGATACTCAAACCGT_19	0.0863013	Background
ACGATACTCACGCGGT_14	-0.152258	Background
ACGATACTCCGATATG_13	-0.653426	Background
ACGATACTCCGCATCT_18	0.453634	Background
ACGATACTCCGTCATC_20	0.0591384	Background
ACGATACTCGAGAGCA_20	0.472013	Background
ACGATGTCACTAAGTC_19	0.175658	Background
ACGATGTGTCAAAGCG_20	0.0258539	Background
ACGATGTGTGCTCTTC_19	-0.171062	Background
ACGCAGCAGCACCGTC_19	-0.16617	Background
ACGCAGCAGGACAGCT_19	0.317084	Background
ACGCAGCCAGGCTGAA_20	-0.471752	Background
ACGCAGCGTCGAGTTT_14	-0.255073	Background
ACGCAGCGTCTCTCGT_15	-0.227411	Background
ACGCAGCGTGTTTGTG_13	0.02817	Background
ACGCAGCGTGTTTGTG_14	-0.177086	Background
ACGCAGCGTTTGTTTC_19	-0.212103	Background
ACGCAGCTCTTACCTA_20	0.389248	Background
ACGCCAGAGACACTAA_20	0.0719681	Background
ACGCCAGAGAGGGATA_19	0.173084	Background
ACGCCAGAGCAAATCA_19	0.179357	Background
ACGCCAGGTCAGAAGC_20	0.197571	Background
ACGCCAGTCAATACCG_19	-0.61538	Background
ACGCCAGTCCTCCTAG_20	-0.163901	Background
ACGCCGAAGATGTGGC_19	-0.493685	Background
ACGCCGACATCGGACC_19	0.00380499	Background
ACGCCGAGTAAATGAC_20	0.217549	Background
ACGGAGAAGACGCAAC_15	0.427468	Background
ACGGAGAAGCCCGAAA_19	0.422959	Background
ACGGAGAAGCTACCGC_19	0.487342	Background
ACGGAGAAGGACAGAA_15	-0.132466	Background
ACGGAGACAAGAAGAG_19	0.203727	Background
ACGGAGACACAGACAG_20	-0.00671324	Background
ACGGAGACACTCTGTC_19	0.112243	Background
ACGGAGACATTAACCG_20	0.296411	Background
ACGGAGAGTTACGCGC_19	0.597721	High-Risk
ACGGAGAGTTTACTCT_19	0.174003	Background
ACGGAGATCAACGGGA_19	-0.0133896	Background
ACGGAGATCCGATATG_13	-0.520234	Background
ACGGAGATCCTTTACA_19	0.403457	Background
ACGGCCAAGTGAAGAG_18	0.312033	Background
ACGGCCAAGTTAGCGG_19	-0.107669	Background
ACGGCCAAGTTTAGGA_20	0.0526997	Background
ACGGCCACAAGCGAGT_13	-0.30492	Background
ACGGCCACAAGCGAGT_14	-0.354279	Background
ACGGCCACAAGCTGTT_15	0.331198	Background
ACGGCCACATGCCTTC_15	0.521801	Background
ACGGCCACATTCGACA_19	0.431691	Background
ACGGCCAGTTCCCGAG_14	-0.411464	Background
ACGGCCATCTCGATGA_18	-0.395938	Background
ACGGCCATCTGGTATG_19	0.444358	Background
ACGGGCTAGCTGTTCA_20	0.29671	Background
ACGGGCTAGTGGCACA_20	0.163578	Background
ACGGGCTAGTGGGATC_14	-0.00480774	Background
ACGGGCTAGTGTCCCG_18	0.30102	Background
ACGGGCTCAATGGAGC_15	-0.253228	Background
ACGGGCTGTAGCGCTC_20	0.183545	Background
ACGGGCTGTAGCTTGT_20	0.0480099	Background
ACGGGCTTCAAACCAC_18	-0.59381	Background
ACGGGCTTCACGACTA_19	0.628104	High-Risk
ACGGGCTTCGTAGATC_13	0.429087	Background
ACGGGCTTCTCTTGAT_20	-0.560749	Background
ACGGGTCAGTGCCATT_18	-0.100816	Background
ACGGGTCCATATGAGA_20	0.235367	Background
ACGGGTCGTTTCGCTC_20	0.249423	Background
ACGGGTCTCAACACAC_19	-0.405231	Background
ACGTCAAAGAAGGTTT_20	-0.145382	Background
ACGTCAAAGATGTAAC_18	-0.254409	Background
ACGTCAAAGGTACTCT_19	0.0146916	Background
ACGTCAAAGGTTACCT_20	0.405954	Background
ACGTCAAAGTTACCCA_13	0.201056	Background
ACGTCAAAGTTACCCA_14	0.53155	Background
ACGTCAAGTAAATGTG_15	-0.163023	Background
ACGTCAAGTATAGGGC_14	-0.652077	Background
ACGTCAAGTTCTCATT_19	0.0884858	Background
ACGTCAATCAAGATCC_20	0.0205566	Background
ACTATCTAGATAGGAG_19	0.374673	Background
ACTATCTAGGGAAACA_20	0.508172	Background
ACTATCTAGGTAAACT_15	0.145602	Background
ACTATCTCACAGCCCA_20	0.12499	Background
ACTATCTCACGTCAGC_19	-0.126108	Background
ACTATCTCAGTCGATT_20	0.150278	Background
ACTATCTGTATGAATG_19	0.38162	Background
ACTATCTGTCGCATCG_14	0.390303	Background
ACTATCTGTCGCTTCT_20	0.223959	Background
ACTGAACAGGTACTCT_14	-0.582338	Background
ACTGAACCAAGCGAGT_20	0.379422	Background
ACTGAACCACCGAAAG_19	0.0940997	Background
ACTGAACCACGACGAA_15	0.116538	Background
ACTGAACCAGCCTATA_20	0.123125	Background
ACTGAACGTAAGGATT_15	-0.0762245	Background
ACTGAACGTACCATCA_19	0.153313	Background
ACTGAACGTCCAGTAT_20	0.491906	Background
ACTGAACGTGAGGCTA_13	-0.60428	Background
ACTGAACTCCACTCCA_20	-0.325482	Background
ACTGAGTCACAAGACG_20	0.261119	Background
ACTGAGTCACCGAATT_13	-0.341719	Background
ACTGAGTGTCATATGC_20	0.235019	Background
ACTGAGTTCATGTAGC_20	0.56877	High-Risk
ACTGAGTTCTCCGGTT_15	0.498521	Background
ACTGAGTTCTTTAGTC_19	-0.00175783	Background
ACTGATGAGCAGGTCA_20	0.385943	Background
ACTGATGAGTAGTGCG_14	0.161407	Background
ACTGATGAGTTGCAGG_15	0.532569	Background
ACTGATGCAACTGGCC_13	0.523039	Background
ACTGATGCAAGCGTAG_20	0.137939	Background
ACTGATGCAGTCAGCC_20	0.21286	Background
ACTGATGCAGTTCCCT_20	-0.0620507	Background
ACTGATGGTCACTGGC_19	-0.525047	Background
ACTGATGGTGATGATA_20	0.189869	Background
ACTGATGGTTGATTGC_19	0.171273	Background
ACTGCTCAGACTCGGA_20	-0.249682	Background
ACTGCTCAGAGGTTGC_19	-0.23673	Background
ACTGCTCAGGTTCCTA_13	-0.329746	Background
ACTGCTCCAGCCAGAA_15	0.22389	Background
ACTGCTCCATTGGGCC_20	0.542592	Background
ACTGCTCGTTTCGCTC_18	-0.0449179	Background
ACTGTCCAGACCTAGG_19	-0.401965	Background
ACTGTCCAGCACCGTC_20	0.202459	Background
ACTGTCCGTTGCGCAC_19	-0.147549	Background
ACTGTCCTCAAACGGG_15	0.00243119	Background
ACTGTCCTCGCCAAAT_20	0.318836	Background
ACTGTCCTCGCCTGTT_20	0.293084	Background
ACTTACTAGCAGATCG_15	0.159586	Background
ACTTACTCACTAAGTC_13	-0.381693	Background
ACTTACTCATATACCG_20	0.008133	Background
ACTTACTCATGCCCGA_20	-0.565227	Background
ACTTACTGTCGCATAT_20	0.540343	Background
ACTTACTGTTGACGTT_20	0.219998	Background
ACTTACTTCTGAGTGT_19	0.247252	Background
ACTTGTTAGCCAGTAG_20	-0.0431347	Background
ACTTGTTAGTCTTGCA_19	0.224356	Background
ACTTGTTCACGGCCAT_19	-0.255541	Background
ACTTGTTCACGTAAGG_20	-0.148048	Background
ACTTGTTCACTAAGTC_14	-0.678381	Background
ACTTGTTGTCGTTGTA_14	-0.0154262	Background
ACTTGTTGTTGTACAC_20	0.400722	Background
ACTTGTTTCAAAGACA_19	0.00825947	Background
ACTTGTTTCAAGGTAA_20	0.0760032	Background
ACTTGTTTCCAAACAC_20	0.154432	Background
ACTTGTTTCTTATCTG_20	0.15677	Background
ACTTGTTTCTTGACGA_15	0.583462	High-Risk
ACTTTCACAAGCCATT_18	0.584928	High-Risk
ACTTTCACACCGATAT_20	0.213566	Background
ACTTTCAGTAGCTGCC_15	-0.0958114	Background
AGAATAGAGTAGCCGA_15	-0.149345	Background
AGAATAGAGTGAAGTT_20	0.310132	Background
AGAATAGCAACGATGG_16	0.353902	Background
AGAATAGCAAGCCTAT_14	-0.469212	Background
AGAATAGGTCTAGTGT_19	-0.123022	Background
AGACGTTAGCCCTAAT_20	0.384877	Background
AGACGTTAGCTGGAAC_20	0.0376341	Background
AGACGTTAGGTTACCT_20	0.203337	Background
AGACGTTTCAGCCTAA_15	-0.165878	Background
AGAGCGAAGCGTTTAC_19	-0.157282	Background
AGAGCGAAGGTGGGTT_14	-0.28738	Background
AGAGCGAGTAAGAGGA_20	0.383381	Background
AGAGCGAGTCTACCTC_20	0.416345	Background
AGAGCGAGTTGGACCC_18	0.340572	Background
AGAGCGAGTTGGGACA_20	0.00675431	Background
AGAGCGATCATTTGGG_19	0.13775	Background
AGAGCGATCTCAACTT_20	0.161038	Background
AGAGCTTAGATCTGCT_19	0.360345	Background
AGAGCTTAGATGTTAG_14	-0.661053	Background
AGAGCTTAGTGCAAGC_20	0.196793	Background
AGAGCTTAGTGGACGT_20	0.239567	Background
AGAGCTTCAAGCCGTC_20	0.395737	Background
AGAGCTTCACGAAGCA_18	0.0943561	Background
AGAGCTTGTGCGGTAA_20	0.175637	Background
AGAGCTTGTGGGTCAA_19	0.324286	Background
AGAGCTTTCATGCATG_15	0.332833	Background
AGAGCTTTCCTTAATC_20	0.176309	Background
AGAGTGGAGGTAAACT_20	0.480084	Background
AGAGTGGAGTCGTTTG_19	0.273339	Background
AGAGTGGCAACGATCT_18	0.318837	Background
AGAGTGGCACAAGCCC_20	0.23761	Background
AGAGTGGCATACGCTA_15	0.286835	Background
AGAGTGGCATACGCTA_16	-0.00126456	Background
AGAGTGGGTACGAAAT_18	0.430396	Background
AGAGTGGGTGTGTGCC_20	0.558959	High-Risk
AGAGTGGGTTCCATGA_18	-0.240288	Background
AGAGTGGGTTGACGTT_14	-0.366652	Background
AGAGTGGTCAATAAGG_20	0.265682	Background
AGAGTGGTCAGTGTTG_15	0.240587	Background
AGAGTGGTCCAATGGT_19	-0.104145	Background
AGAGTGGTCTAACTCT_14	-0.177694	Background
AGATCTGAGACTAGAT_19	0.481242	Background
AGATCTGAGATCTGAA_20	0.251957	Background
AGATCTGCAAAGGCGT_20	0.0506462	Background
AGATCTGCAGGACGTA_15	0.186302	Background
AGATCTGCATGGTAGG_18	-0.205569	Background
AGATCTGGTCAGAAGC_18	-0.270994	Background
AGATCTGGTTGTACAC_20	0.192183	Background
AGATCTGTCAAAGACA_15	0.505103	Background
AGATCTGTCGCTTGTC_20	0.21915	Background
AGATTGCAGGCAAAGA_20	-0.396415	Background
AGATTGCCAGACGCCT_15	0.353916	Background
AGATTGCCATGGTTGT_20	0.378052	Background
AGATTGCGTACAAGTA_20	0.408249	Background
AGATTGCGTCGCGTGT_13	-0.335308	Background
AGATTGCGTCGCGTGT_14	-0.217788	Background
AGCAGCCAGGCCATAG_19	0.201266	Background
AGCAGCCAGTTAGGTA_18	0.645729	High-Risk
AGCAGCCCAAGAAGAG_13	-0.704447	Background
AGCAGCCCAAGACACG_20	-0.0698609	Background
AGCAGCCCACTCTGTC_20	0.331116	Background
AGCAGCCGTAGGAGTC_13	-0.657905	Background
AGCAGCCGTGAGTATA_20	0.359301	Background
AGCAGCCTCAGCATGT_18	0.2536	Background
AGCATACAGTCGATAA_13	-0.5792	Background
AGCATACCAATCCAAC_15	0.365267	Background
AGCATACCACGTGAGA_14	0.0477221	Background
AGCATACCATTCTCAT_19	-0.276198	Background
AGCATACGTGCAGGTA_19	0.163319	Background
AGCATACTCGTCGTTC_15	0.519128	Background
AGCATACTCTCAAGTG_20	0.549667	Background
AGCATACTCTCCCTGA_16	-0.00911029	Background
AGCCTAAAGACCTTTG_15	0.0947797	Background
AGCCTAAAGCCTTGAT_20	-0.388498	Background
AGCCTAACAATCGAAA_15	-0.0987217	Background
AGCCTAACACAAGCCC_15	0.177699	Background
AGCCTAACACAGGCCT_19	0.0893465	Background
AGCCTAACACGCCAGT_18	0.282864	Background
AGCCTAACATGACATC_20	-0.0356889	Background
AGCCTAACATTACGAC_19	-0.049035	Background
AGCCTAAGTATCACCA_15	-0.383521	Background
AGCCTAAGTTACGCGC_20	0.37944	Background
AGCGGTCAGACCACGA_19	0.632572	High-Risk
AGCGGTCAGATGAGAG_20	-0.450893	Background
AGCGGTCAGCATCATC_15	0.146536	Background
AGCGGTCCAATAAGCA_13	0.084208	Background
AGCGGTCCAATAAGCA_14	0.554492	High-Risk
AGCGGTCCACCAGTTA_15	0.335592	Background
AGCGGTCCACCCATTC_20	-0.628541	Background
AGCGGTCCAGCCTGTG_18	0.293509	Background
AGCGGTCTCAGCTGGC_19	0.711126	High-Risk
AGCGGTCTCCAGATCA_15	-0.205429	Background
AGCGGTCTCGACGGAA_13	-0.101104	Background
AGCGGTCTCGTGGTCG_19	-0.360025	Background
AGCGGTCTCTTCGGTC_19	0.462553	Background
AGCGGTCTCTTGAGAC_19	0.0742748	Background
AGCGGTCTCTTGGGTA_20	0.210961	Background
AGCGTATAGCCCAGCT_15	-0.153882	Background
AGCGTATCAGGATCGA_19	-0.11205	Background
AGCGTATGTTATTCTC_18	0.312611	Background
AGCGTATTCAACACTG_15	0.435597	Background
AGCGTATTCCCTGACT_13	-0.150304	Background
AGCGTATTCGAGAACG_13	-0.520126	Background
AGCGTCGAGACCACGA_19	-0.490371	Background
AGCGTCGAGATGGCGT_14	0.442743	Background
AGCGTCGCACAAGCCC_19	-0.193342	Background
AGCGTCGCACAAGTAA_14	-0.225229	Background
AGCGTCGCACAGAGGT_13	-0.582315	Background
AGCGTCGCACGCTTTC_14	-0.141874	Background
AGCGTCGCAGTAAGCG_13	-0.117695	Background
AGCGTCGTCAACGAAA_16	0.430273	Background
AGCGTCGTCGGCCGAT_20	0.35295	Background
AGCTCCTAGACAGACC_13	-0.353401	Background
AGCTCCTAGACAGACC_14	-0.645001	Background
AGCTCCTAGACTAAGT_20	0.0501858	Background
AGCTCCTGTAAGAGGA_13	-0.27175	Background
AGCTCCTGTAAGAGGA_14	-0.437659	Background
AGCTCCTGTAGCGTAG_20	0.499503	Background
AGCTCCTTCCACTGGG_20	0.432908	Background
AGCTCCTTCTGTCTAT_13	-0.54085	Background
AGCTCTCAGCGATAGC_18	-0.553125	Background
AGCTCTCAGGGTTTCT_20	0.380394	Background
AGCTCTCAGGTCATCT_20	0.224193	Background
AGCTCTCAGGTGATTA_15	0.583425	High-Risk
AGCTCTCAGTCGATAA_15	0.3724	Background
AGCTCTCCAGATGAGC_20	0.27482	Background
AGCTCTCGTAGGAGTC_13	-0.644429	Background
AGCTCTCTCCGTTGTC_20	0.229179	Background
AGCTCTCTCGCATGGC_18	0.272255	Background
AGCTCTCTCGCGATCG_14	-0.66121	Background
AGCTCTCTCGGAGGTA_20	-0.564068	Background
AGCTTGAAGACAGGCT_20	-0.448242	Background
AGCTTGAAGATCTGAA_18	-0.245942	Background
AGCTTGAAGGACAGCT_13	0.121627	Background
AGCTTGAAGGACAGCT_14	0.324608	Background
AGCTTGAAGGATCGCA_19	0.423447	Background
AGCTTGAAGTAGTGCG_19	-0.264719	Background
AGCTTGACAAACCTAC_20	0.0983567	Background
AGCTTGACACAGACTT_15	0.0535962	Background
AGCTTGACACCATCCT_13	-0.35942	Background
AGCTTGACAGATTGCT_20	0.333004	Background
AGCTTGACATAGAAAC_18	0.358484	Background
AGCTTGAGTAAGGATT_19	0.129767	Background
AGCTTGATCATTCACT_14	0.126329	Background
AGCTTGATCATTCACT_15	-0.225553	Background
AGGCCACAGCTAACTC_20	0.111511	Background
AGGCCACAGTCCATAC_15	0.264801	Background
AGGCCACAGTGGTCCC_16	0.375185	Background
AGGCCACCACGGTAAG_20	0.403556	Background
AGGCCACGTAAACACA_13	-0.141489	Background
AGGCCACGTACGCACC_20	0.226406	Background
AGGCCACGTGACGCCT_14	0.398377	Background
AGGCCACGTGCGCTTG_19	0.254205	Background
AGGCCACGTTCAGTAC_13	-0.299939	Background
AGGCCACTCACATAGC_13	-0.353634	Background
AGGCCACTCACCAGGC_13	-0.339369	Background
AGGCCACTCCAGTAGT_18	0.0607466	Background
AGGCCGTAGCGATGAC_13	0.215053	Background
AGGCCGTAGCGATGAC_14	0.50008	Background
AGGCCGTAGCTTATCG_19	0.327292	Background
AGGCCGTAGTGCGTGA_15	0.475495	Background
AGGCCGTAGTGGAGAA_20	-0.116589	Background
AGGCCGTCACGGATAG_19	0.132196	Background
AGGCCGTCAGTGAGTG_19	-0.299801	Background
AGGCCGTTCAGCGACC_15	0.290146	Background
AGGCCGTTCTGTTTGT_14	-0.4249	Background
AGGGAGTAGTGCCAGA_13	-0.276552	Background
AGGGAGTAGTGCCAGA_14	-0.0950218	Background
AGGGAGTCAGCGTCCA_15	-0.154326	Background
AGGGAGTCAGTTAACC_16	0.104324	Background
AGGGAGTTCTAACTGG_20	0.229398	Background
AGGGATGAGAACAATC_18	-0.085907	Background
AGGGATGAGCGTTTAC_18	0.516416	Background
AGGGATGCAGTAACGG_13	-0.672412	Background
AGGGATGCAGTCGTGC_15	-0.0903852	Background
AGGGATGGTCACACGC_20	0.158471	Background
AGGGATGGTCACTTCC_15	0.104942	Background
AGGGATGGTTCGGCAC_13	-0.206421	Background
AGGGATGGTTTGCATG_14	-0.453516	Background
AGGGATGTCAGCTTAG_14	0.175501	Background
AGGGATGTCTCTGAGA_20	-0.140144	Background
AGGGATGTCTGCTGTC_19	0.219165	Background
AGGGTGACAATAGCAA_14	0.0155133	Background
AGGGTGATCTACCTGC_19	0.368645	Background
AGGGTGATCTGCGACG_20	-0.149984	Background
AGGTCATAGACACGAC_15	0.53607	Background
AGGTCATAGCTCCCAG_19	-0.436152	Background
AGGTCATCAGGTTTCA_19	0.293047	Background
AGGTCATGTCCTCCAT_20	0.305176	Background
AGGTCATGTGAAAGAG_15	0.209458	Background
AGGTCATGTGAGTGAC_19	0.381106	Background
AGGTCATGTGTTAAGA_16	-0.0631911	Background
AGGTCATTCAGGTAAA_15	0.420191	Background
AGGTCATTCCATGAAC_19	-0.402547	Background
AGGTCATTCGAATGGG_20	0.107608	Background
AGGTCATTCTAACTCT_14	0.507852	Background
AGGTCATTCTTGCCGT_19	-0.745372	Background
AGGTCCGCAAACAACA_19	0.0326787	Background
AGGTCCGGTAAGAGGA_20	0.490035	Background
AGGTCCGGTAATAGCA_18	-0.384602	Background
AGGTCCGGTAGGGACT_20	0.295683	Background
AGGTCCGGTATGGTTC_20	0.0849819	Background
AGGTCCGGTGATAAGT_13	-0.215613	Background
AGGTCCGGTGCGAAAC_19	-0.260089	Background
AGGTCCGGTTTGACAC_13	-0.408694	Background
AGGTCCGTCAAGGCTT_19	0.357723	Background
AGGTCCGTCTCTAGGA_20	0.474466	Background
AGGTCCGTCTGCAAGT_20	0.413391	Background
AGTAGTCAGAGCTGCA_20	-0.224691	Background
AGTAGTCAGCAGGTCA_20	0.321921	Background
AGTAGTCCAGTATGCT_19	-0.447721	Background
AGTAGTCTCGCATGAT_14	-0.0837642	Background
AGTCTTTAGAATTCCC_20	0.373709	Background
AGTCTTTCACCGAATT_14	-0.00719718	Background
AGTCTTTGTAGGCATG_20	-0.0154722	Background
AGTCTTTGTCATGCCG_18	0.35009	Background
AGTCTTTGTGTGACCC_20	0.118069	Background
AGTCTTTGTTGCCTCT_19	-0.526076	Background
AGTCTTTGTTGCGTTA_14	-0.0238003	Background
AGTCTTTTCAAGGTAA_20	0.253636	Background
AGTCTTTTCACCAGGC_20	0.431295	Background
AGTCTTTTCTCGATGA_19	-0.377397	Background
AGTGAGGAGCGTAGTG_20	0.340951	Background
AGTGAGGAGCTTCGCG_19	0.389626	Background
AGTGAGGAGGACCACA_19	-0.116439	Background
AGTGAGGAGTTAGGTA_20	-0.0879544	Background
AGTGAGGCATGTTCCC_20	0.283299	Background
AGTGAGGGTCTAGGTT_20	0.199922	Background
AGTGAGGGTTGTACAC_20	-0.0561642	Background
AGTGGGAAGAGTACAT_18	0.0324354	Background
AGTGGGAAGCTGCCCA_18	0.317393	Background
AGTGGGAAGTACATGA_20	0.276782	Background
AGTGGGAAGTAGGTGC_19	-0.0153693	Background
AGTGGGAAGTCACGCC_20	0.216762	Background
AGTGGGAAGTGTTGAA_19	0.173608	Background
AGTGGGACAGGCGATA_19	0.459275	Background
AGTGGGAGTATTACCG_20	0.194218	Background
AGTGGGAGTCGCTTCT_14	-0.156124	Background
AGTGGGATCGGATGGA_19	-0.00742364	Background
AGTGGGATCTGTTTGT_13	-0.388074	Background
AGTGTCAAGCGTAATA_20	0.179124	Background
AGTGTCAAGTAGCGGT_19	-0.313785	Background
AGTGTCAAGTTTCCTT_19	-0.0490933	Background
AGTGTCACAATTCCTT_19	0.313513	Background
AGTGTCACAGGTGCCT_20	0.367492	Background
AGTGTCACAGTTTACG_14	-0.164421	Background
AGTGTCAGTACATGTC_19	0.0897374	Background
AGTGTCAGTGATGCCC_19	-0.0389004	Background
AGTGTCAGTTCGCGAC_15	0.461533	Background
AGTGTCAGTTCTGGTA_20	0.539091	Background
AGTGTCATCATCTGCC_19	0.51263	Background
AGTTGGTAGCAGACTG_13	-0.221712	Background
AGTTGGTAGCAGACTG_14	-0.099001	Background
AGTTGGTCAAACGTGG_13	-0.368424	Background
AGTTGGTCACAAGACG_18	0.272733	Background
AGTTGGTCACCTATCC_13	0.0943176	Background
AGTTGGTGTAGATTAG_18	0.240239	Background
AGTTGGTGTATAGGTA_19	-0.213287	Background
AGTTGGTGTCCGCTGA_14	0.110656	Background
AGTTGGTGTTTCGCTC_18	0.378042	Background
AGTTGGTTCAGCGACC_20	0.285634	Background
AGTTGGTTCATGCAAC_20	-0.245738	Background
AGTTGGTTCTTAGAGC_20	0.197359	Background
AGTTGGTTCTTGAGAC_20	0.301481	Background
ATAACGCAGCCAACAG_15	-0.137399	Background
ATAACGCAGCTCAACT_18	0.392997	Background
ATAACGCAGTCTCGGC_19	-0.556368	Background
ATAACGCCAGTTAACC_20	0.352112	Background
ATAACGCGTCTCTCTG_20	0.327975	Background
ATAACGCGTGCAACGA_16	0.287934	Background
ATAACGCGTTTGTGTG_14	-0.379002	Background
ATAAGAGAGAGTCTGG_20	-0.0625187	Background
ATAAGAGCAGGGTTAG_20	0.190228	Background
ATAAGAGGTAAACGCG_20	-0.290208	Background
ATAAGAGGTAGAAAGG_19	0.562588	High-Risk
ATAAGAGGTTACTGAC_20	0.381567	Background
ATAAGAGGTTCACCTC_19	0.677147	High-Risk
ATAAGAGTCAGTCCCT_15	-0.189239	Background
ATAAGAGTCGTCACGG_14	-0.0361643	Background
ATAGACCAGGGAACGG_20	0.161088	Background
ATAGACCCATGTCCTC_20	0.597517	High-Risk
ATAGACCGTATATGAG_19	0.414822	Background
ATAGACCGTGTTGGGA_15	-0.0547865	Background
ATAGACCGTTAAGTAG_17	0.237182	Background
ATAGACCGTTGGTGGA_15	-0.188692	Background
ATAGACCTCCCTTGTG_13	-0.413965	Background
ATCACGAAGACCTTTG_16	-0.100768	Background
ATCACGAAGTCCGTAT_15	0.114986	Background
ATCACGACACACGCTG_15	0.132891	Background
ATCACGACACGTCTCT_14	-0.577348	Background
ATCACGACACTGTGTA_18	0.527673	Background
ATCACGACAGCCACCA_14	0.0654949	Background
ATCACGAGTAAGTAGT_20	0.0895499	Background
ATCACGAGTAGCAAAT_19	-0.509608	Background
ATCACGAGTGTGACGA_20	0.0104662	Background
ATCACGATCACTTACT_19	0.563051	High-Risk
ATCACGATCCCGGATG_15	-0.0575196	Background
ATCACGATCTTATCTG_20	0.215989	Background
ATCATCTAGAACAACT_20	0.25422	Background
ATCATCTAGAGAGCTC_16	0.263122	Background
ATCATCTAGCGCCTTG_19	0.366712	Background
ATCATCTAGTACACCT_19	0.0393148	Background
ATCATCTCACGGTAAG_15	0.545194	Background
ATCATCTCAGCATACT_15	0.511272	Background
ATCATCTCAGCCTTTC_19	-0.31918	Background
ATCATCTGTAAACGCG_19	0.416786	Background
ATCATCTGTCATTAGC_14	-0.504178	Background
ATCATCTGTCTACCTC_19	0.24794	Background
ATCATCTTCCTTTCGG_19	0.19925	Background
ATCATCTTCTCAACTT_19	-0.0512959	Background
ATCATGGAGATAGCAT_19	-0.0770907	Background
ATCATGGAGTGAACAT_20	-0.407625	Background
ATCATGGAGTGCTGCC_19	0.230906	Background
ATCATGGCACTTGGAT_20	0.160533	Background
ATCCACCAGCGTTTAC_13	-0.193446	Background
ATCCACCAGCTAACTC_13	0.358655	Background
ATCCACCAGTTGAGTA_19	-0.318854	Background
ATCCACCCAGAAGCAC_13	-0.423376	Background
ATCCACCCAGAAGCAC_14	-0.1767	Background
ATCCACCCATACTCTT_20	0.0906432	Background
ATCCACCGTCCATCCT_15	-0.0112121	Background
ATCCACCGTCTTGCGG_18	-0.254928	Background
ATCCACCTCGGCATCG_20	0.247133	Background
ATCCACCTCGGCGGTT_14	-0.0610554	Background
ATCCACCTCTCTAAGG_19	-0.0608267	Background
ATCCGAAAGGGATGGG_15	0.0911951	Background
ATCCGAACACGCGAAA_18	0.111031	Background
ATCCGAACACGTCAGC_20	-0.572068	Background
ATCCGAACACTGAAGG_15	-0.0370408	Background
ATCCGAACAGATGAGC_20	-0.181172	Background
ATCCGAAGTCCTAGCG_14	-0.366897	Background
ATCCGAAGTCTAGGTT_20	0.337669	Background
ATCGAGTAGCCAGGAT_18	-0.126786	Background
ATCGAGTAGCCGATTT_20	0.239631	Background
ATCGAGTAGCTAAACA_15	-0.209461	Background
ATCGAGTAGGCAAAGA_14	0.386787	Background
ATCGAGTAGGCGACAT_19	-0.261393	Background
ATCGAGTAGTGATCGG_15	-0.430284	Background
ATCGAGTCACTGTTAG_14	-0.300434	Background
ATCGAGTTCTTTACAC_20	-0.00229886	Background
ATCTACTAGTCTCGGC_18	0.522532	Background
ATCTACTAGTGTTTGC_14	-0.30696	Background
ATCTACTCAATACGCT_20	0.207238	Background
ATCTACTGTATTCTCT_19	0.240918	Background
ATCTACTGTCACAAGG_20	0.169207	Background
ATCTACTGTCTTCAAG_20	0.559005	High-Risk
ATCTACTTCATCATTC_16	-0.0098974	Background
ATCTACTTCGCCGTGA_20	0.297169	Background
ATCTGCCAGAGCCTAG_14	-0.15718	Background
ATCTGCCAGAGCTGGT_20	-0.0573233	Background
ATCTGCCAGAGTAAGG_19	0.169356	Background
ATCTGCCAGATATGCA_19	0.139191	Background
ATCTGCCCAAGCGATG_18	0.117408	Background
ATCTGCCCACCTCGTT_20	0.376676	Background
ATCTGCCCACTTAACG_14	-0.392898	Background
ATCTGCCGTCAGAATA_18	0.43993	Background
ATCTGCCTCAACCATG_19	0.182808	Background
ATCTGCCTCCTCTAGC_15	0.220402	Background
ATGAGGGAGAATGTGT_19	0.365212	Background
ATGAGGGAGCTGCCCA_18	0.238962	Background
ATGAGGGAGTGAATTG_20	0.0242979	Background
ATGAGGGGTTCAACCA_20	-0.0636462	Background
ATGAGGGGTTGCGTTA_18	0.204003	Background
ATGAGGGTCGCTAGCG_20	0.439226	Background
ATGCGATAGACTTGAA_20	0.332851	Background
ATGCGATAGATGAGAG_20	0.695075	High-Risk
ATGCGATAGTGTACGG_20	0.270585	Background
ATGCGATCAAGTTAAG_19	0.0583556	Background
ATGCGATCACGCATCG_19	0.62251	High-Risk
ATGCGATCAGTCAGAG_13	-0.386199	Background
ATGCGATCAGTCAGAG_14	-0.0495552	Background
ATGCGATTCGCCGTGA_20	0.237134	Background
ATGCGATTCTATGTGG_19	-0.345485	Background
ATGGGAGAGACTAGGC_20	-0.0936854	Background
ATGGGAGAGATGTCGG_20	0.313641	Background
ATGGGAGAGCGAAGGG_20	0.354168	Background
ATGGGAGAGGAGTAGA_20	0.212277	Background
ATGGGAGCATACCATG_14	-0.34211	Background
ATGGGAGGTACTCAAC_13	-0.297884	Background
ATGGGAGGTACTCAAC_14	-0.270842	Background
ATGGGAGGTCGAGATG_18	0.324269	Background
ATGGGAGGTGGCGAAT_14	0.225876	Background
ATGGGAGGTGGCGAAT_15	0.10852	Background
ATGGGAGGTTCCATGA_20	0.211884	Background
ATGGGAGTCCAAACAC_14	-0.0728474	Background
ATGTGTGAGTGGTCCC_19	0.726258	High-Risk
ATGTGTGGTGACCAAG_20	0.0658316	Background
ATGTGTGGTTAGTGGG_20	0.543557	Background
ATGTGTGTCTTTACGT_14	-0.129229	Background
ATTACTCAGAGACGAA_13	-0.514203	Background
ATTACTCAGAGACGAA_14	-0.597288	Background
ATTACTCAGCAGGCTA_15	0.666733	High-Risk
ATTACTCAGGCATGTG_13	-0.390124	Background
ATTACTCCAATGCCAT_13	-0.053117	Background
ATTACTCCACAGGCCT_13	-0.235664	Background
ATTACTCCACATAACC_20	-0.0850767	Background
ATTACTCCACTGAAGG_20	0.102605	Background
ATTACTCGTGTGGTTT_20	0.555114	High-Risk
ATTACTCGTTATCGGT_19	0.466005	Background
ATTATCCAGGCAAAGA_14	0.274778	Background
ATTATCCAGGCAAAGA_15	0.0413206	Background
ATTATCCAGGCCCTTG_20	0.355898	Background
ATTATCCCAAGTCTGT_20	0.248233	Background
ATTATCCCAATCTACG_15	0.445304	Background
ATTATCCCACACCGCA_20	0.527958	Background
ATTATCCCAGATTGCT_15	0.467635	Background
ATTATCCCATTGGTAC_15	0.475836	Background
ATTATCCGTAAGGATT_14	0.527244	Background
ATTATCCGTAGCCTCG_19	0.593984	High-Risk
ATTATCCGTCAGCTAT_19	0.263328	Background
ATTATCCGTTCAGCGC_15	0.0476028	Background
ATTATCCGTTCAGTAC_20	0.388783	Background
ATTCTACAGCTTATCG_13	-0.34569	Background
ATTCTACAGCTTATCG_14	-0.206931	Background
ATTCTACAGTCAAGCG_19	0.041614	Background
ATTCTACAGTCGAGTG_13	-0.154834	Background
ATTCTACAGTCGAGTG_14	0.0487372	Background
ATTCTACAGTTGTAGA_13	-0.493042	Background
ATTCTACCAATGTTGC_14	-0.414133	Background
ATTCTACCACAGGAGT_13	-0.512975	Background
ATTCTACCATCCCATC_13	0.294691	Background
ATTCTACGTCAGAGGT_19	0.248301	Background
ATTCTACGTCGCATAT_19	0.134125	Background
ATTCTACGTTATTCTC_19	0.133629	Background
ATTCTACTCAGAGCTT_20	0.238145	Background
ATTCTACTCCCTCAGT_15	-0.112894	Background
ATTCTACTCGATAGAA_20	0.438183	Background
ATTCTACTCTACTTAC_20	0.334625	Background
ATTCTACTCTCGAGTA_20	0.204756	Background
ATTGGACAGTACATGA_19	0.0751504	Background
ATTGGACAGTACGTAA_20	0.178556	Background
ATTGGACAGTTTCCTT_20	-0.0969486	Background
ATTGGACCAAACCCAT_20	0.167732	Background
ATTGGACGTGCGATAG_20	-0.218025	Background
ATTGGACGTGGGTCAA_15	-0.406446	Background
ATTGGACGTGGTGTAG_20	0.239949	Background
ATTGGACTCGTCCAGG_19	0.0834147	Background
ATTGGTGCAATAGCAA_19	0.485557	Background
ATTGGTGCACACTGCG_19	-0.0826795	Background
ATTGGTGCAGCCAATT_13	-0.0784446	Background
ATTTCTGAGACACTAA_20	0.222822	Background
ATTTCTGAGTTCGCAT_20	0.242362	Background
ATTTCTGCAATGTTGC_15	0.489927	Background
ATTTCTGCACTAAGTC_15	-0.600252	Background
ATTTCTGCAGCCTGTG_13	-0.44024	Background
ATTTCTGCAGCCTGTG_14	-0.522266	Background
ATTTCTGCATCAGTCA_19	0.132783	Background
ATTTCTGCATGCATGT_20	-0.0784909	Background
ATTTCTGGTAAATACG_20	0.387656	Background
ATTTCTGGTAAGCACG_20	0.335271	Background
ATTTCTGGTATCACCA_19	0.436769	Background
ATTTCTGGTATCTGCA_20	0.243931	Background
ATTTCTGTCAGTTCGA_19	0.158198	Background
CAACCAAAGAAACCGC_20	-0.293596	Background
CAACCAAAGAGGTACC_14	-0.422917	Background
CAACCAAAGATGTGTA_19	0.0169239	Background
CAACCAAAGCACGCCT_20	0.272859	Background
CAACCAAAGCCACGCT_19	0.0769427	Background
CAACCAAAGGCGCTCT_19	-0.332731	Background
CAACCAAAGTTTCCTT_13	-0.423457	Background
CAACCAACAAACAACA_19	0.161435	Background
CAACCAACATGATCCA_19	-0.172876	Background
CAACCAAGTAAGTGTA_19	-0.0630991	Background
CAACCAAGTACCGTAT_14	0.189571	Background
CAACCAAGTGCCTTGG_14	-0.153448	Background
CAACCAAGTGCCTTGG_20	0.135327	Background
CAACCAAGTTGCCTCT_18	0.0683329	Background
CAACCTCAGAAGGACA_15	0.526806	Background
CAACCTCAGATGAGAG_20	0.290513	Background
CAACCTCCAAGCGATG_20	0.246893	Background
CAACCTCCAATGAAAC_20	-0.416848	Background
CAACCTCCAGATAATG_14	-0.119334	Background
CAACCTCGTTCAGCGC_13	-0.0994927	Background
CAACCTCTCAGCTGGC_20	-0.0924664	Background
CAACCTCTCGTGGTCG_20	-0.635189	Background
CAACTAGAGCGCTCCA_18	-0.243793	Background
CAACTAGAGGAATCGC_19	0.122394	Background
CAACTAGAGGCAGGTT_19	-0.181995	Background
CAACTAGAGTGAACAT_19	0.233312	Background
CAACTAGCAAGGTTCT_15	0.161784	Background
CAACTAGCAAGGTTCT_16	0.113468	Background
CAACTAGCACTTGGAT_19	0.32242	Background
CAACTAGCATACTCTT_15	-0.189346	Background
CAACTAGGTCAGCTAT_16	0.00776873	Background
CAACTAGGTTTGGGCC_20	0.0990082	Background
CAACTAGTCAAAGTAG_18	0.479553	Background
CAACTAGTCGCTGATA_20	0.00529737	Background
CAAGAAAAGCATGGCA_14	-0.0876153	Background
CAAGAAAAGCATGGCA_15	-0.0812219	Background
CAAGAAAAGCATGGCA_16	0.0993078	Background
CAAGAAAAGGCAATTA_14	-0.365693	Background
CAAGAAAAGTTGAGAT_13	-0.0344842	Background
CAAGAAACACTGAAGG_19	0.509335	Background
CAAGAAACAGGGTACA_13	-0.667117	Background
CAAGAAAGTGAGGCTA_15	-0.183911	Background
CAAGAAATCAGTTGAC_19	0.190887	Background
CAAGAAATCCTAGAAC_13	-0.653369	Background
CAAGAAATCCTAGAAC_16	-0.0513833	Background
CAAGATCAGGTGATTA_19	0.0738767	Background
CAAGATCCACATGGGA_15	0.493542	Background
CAAGATCCAGTCCTTC_13	-0.383033	Background
CAAGATCCAGTCCTTC_14	-0.258725	Background
CAAGATCGTTATTCTC_13	-0.480564	Background
CAAGATCTCTTATCTG_15	-0.109458	Background
CAAGGCCAGTCCAGGA_19	0.413067	Background
CAAGGCCCAAGTCTAC_19	0.402879	Background
CAAGGCCCATTCTTAC_19	-0.237622	Background
CAAGGCCGTCCCTACT_15	0.271622	Background
CAAGGCCGTCCCTACT_20	0.261019	Background
CAAGGCCTCAATACCG_18	0.129308	Background
CAAGGCCTCACGCGGT_15	2.90088e-05	Background
CAAGTTGCAATACGCT_19	0.41353	Background
CAAGTTGCACATGTGT_20	-0.0830407	Background
CAAGTTGCATCGATTG_14	0.0490528	Background
CAAGTTGGTCTTGATG_20	0.619375	High-Risk
CAAGTTGGTTCCAACA_15	0.364248	Background
CAAGTTGGTTTAGCTG_20	0.0925325	Background
CAAGTTGTCACTATTC_20	0.602147	High-Risk
CAAGTTGTCCCTAATT_19	0.042789	Background
CAAGTTGTCGGCATCG_15	-0.0414641	Background
CACAAACAGAGCTGGT_14	-0.379418	Background
CACAAACCAGGTGGAT_20	0.289579	Background
CACAAACGTATTCTCT_20	0.35759	Background
CACAAACGTCTAACGT_13	-0.566708	Background
CACAAACGTGGTGTAG_19	0.0398772	Background
CACAAACGTGTGAATA_15	-0.176453	Background
CACAAACTCAGGCGAA_20	0.336784	Background
CACAAACTCTGTACGA_20	0.180125	Background
CACAAACTCTGTTGAG_20	0.51518	Background
CACACAAAGCCTATGT_19	-0.528537	Background
CACACAACACGAGAGT_13	0.132669	Background
CACACAATCCAAACTG_20	0.379591	Background
CACACAATCCACTGGG_15	-0.259985	Background
CACACAATCCGGCACA_19	0.568197	High-Risk
CACACAATCGTGGACC_15	0.268247	Background
CACACAATCTCAAGTG_18	0.457722	Background
CACACCTAGGCCCTTG_14	-0.322673	Background
CACACCTAGTCTCGGC_20	0.365559	Background
CACACCTAGTGTACGG_14	0.414577	Background
CACACCTCACGAAGCA_14	-0.203711	Background
CACACCTCAGCCTGTG_19	0.0709824	Background
CACACCTCAGCTGTTA_20	0.0544211	Background
CACACCTGTGGGTCAA_20	-0.00502236	Background
CACACCTTCACAACGT_19	0.0154411	Background
CACACCTTCACCCTCA_20	0.511436	Background
CACACCTTCATAGCAC_20	-0.411974	Background
CACACCTTCCGAGCCA_14	-0.37223	Background
CACACCTTCTCACATT_15	0.375562	Background
CACACTCAGGTTCCTA_20	0.315323	Background
CACACTCAGTAGGTGC_20	0.312406	Background
CACACTCCATCGGACC_20	-0.36976	Background
CACACTCGTAAGCACG_14	0.294876	Background
CACACTCGTAAGCACG_15	0.238638	Background
CACACTCGTCGAACAG_18	0.174041	Background
CACACTCTCCAAAGTC_13	-0.482	Background
CACACTCTCCAAAGTC_14	-0.350172	Background
CACACTCTCCAAGTAC_19	-0.414467	Background
CACAGGCAGAAGGCCT_20	0.387687	Background
CACAGGCAGACATAAC_19	-0.123045	Background
CACAGGCAGGTGCAAC_15	-0.0440108	Background
CACAGGCAGTTTAGGA_20	0.258693	Background
CACAGGCCAACGATGG_20	0.397271	Background
CACAGGCCAATTCCTT_20	0.49692	Background
CACAGGCCACGCGAAA_20	0.0807001	Background
CACAGGCCACGGCTAC_19	-0.0442804	Background
CACAGGCGTCTGCAAT_19	-0.245267	Background
CACAGGCGTTCAGGCC_18	-0.11615	Background
CACAGGCTCATTCACT_20	0.581858	High-Risk
CACAGGCTCCATTCTA_15	0.402451	Background
CACAGTAAGTACGCCC_13	0.331116	Background
CACAGTACAATGGACG_20	0.348219	Background
CACAGTACAGTCGTGC_14	0.0332223	Background
CACAGTACATAACCTG_19	-0.640673	Background
CACAGTAGTAAATACG_19	0.288299	Background
CACAGTATCGGAAATA_20	0.170234	Background
CACATAGGTACCGTAT_15	0.461521	Background
CACATAGGTGCAACTT_19	0.130477	Background
CACATAGGTTTCCACC_20	-0.261602	Background
CACATAGTCAGAAATG_15	-0.184763	Background
CACATAGTCCTTTCTC_20	0.101687	Background
CACATAGTCGGTGTTA_20	-0.00428628	Background
CACATAGTCTGCGACG_20	0.00394124	Background
CACATTTAGACTCGGA_18	-0.549867	Background
CACATTTAGCCAACAG_20	0.256857	Background
CACATTTAGTGGTAGC_15	0.102961	Background
CACATTTCAGATTGCT_18	0.657136	High-Risk
CACATTTGTACGAAAT_19	0.403718	Background
CACATTTGTAGCACGA_15	-0.428471	Background
CACATTTGTCATATGC_20	0.30026	Background
CACATTTTCAAGAAGT_13	-0.117412	Background
CACATTTTCAAGAAGT_14	-0.263558	Background
CACATTTTCAGTTTGG_19	0.419993	Background
CACATTTTCCGTACAA_14	-0.0739678	Background
CACATTTTCCTTGCCA_14	0.110824	Background
CACATTTTCCTTGCCA_15	0.0311814	Background
CACCACTAGTCCAGGA_20	0.109586	Background
CACCACTCATCGGAAG_15	0.115619	Background
CACCACTCATGAGCGA_19	0.473918	Background
CACCACTGTCCGAAGA_15	0.298638	Background
CACCACTGTCCGACGT_16	0.145478	Background
CACCACTGTCGCCATG_19	0.241411	Background
CACCACTGTCTGCGGT_20	-0.508433	Background
CACCACTTCCTGTACC_20	0.100388	Background
CACCAGGAGACAAGCC_18	-0.0152126	Background
CACCAGGAGATATGGT_20	0.268372	Background
CACCAGGAGCTCCCAG_20	0.649269	High-Risk
CACCAGGAGGAATGGA_19	-0.218907	Background
CACCAGGCAGTCTTCC_20	0.0730702	Background
CACCAGGCATTCCTCG_19	-0.205491	Background
CACCAGGGTACGCACC_20	0.153402	Background
CACCAGGGTCGACTGC_19	0.0697927	Background
CACCAGGGTTACTGAC_20	0.145442	Background
CACCAGGGTTCTGGTA_19	0.166963	Background
CACCAGGGTTTCCACC_15	-0.204978	Background
CACCAGGTCATTGCCC_14	-0.366735	Background
CACCAGGTCCCATTTA_15	-0.0520506	Background
CACCAGGTCCTGCCAT_15	-0.23788	Background
CACCAGGTCGCCTGTT_19	0.546106	Background
CACCTTGAGGCGTACA_19	-0.0952073	Background
CACCTTGTCCGCATCT_19	-0.256659	Background
CACCTTGTCCTGCTTG_20	0.179873	Background
CACCTTGTCGTCGTTC_20	0.565528	High-Risk
CACTCCACAGGGATTG_20	0.326235	Background
CACTCCAGTGTGCCTG_14	-0.290724	Background
CACTCCATCTGGCGAC_20	0.338211	Background
CAGAATCCAGGTCGTC_14	-0.541515	Background
CAGAATCGTAAGAGAG_19	0.582444	High-Risk
CAGAATCGTTTGCATG_20	0.328478	Background
CAGAATCGTTTGTGTG_20	-0.408641	Background
CAGAATCTCGATCCCT_18	0.10646	Background
CAGAGAGAGCCACTAT_18	0.410966	Background
CAGAGAGAGTGAATTG_16	-0.1772	Background
CAGAGAGCAGAAGCAC_19	0.167629	Background
CAGAGAGCAGCGTTCG_20	0.287275	Background
CAGAGAGCAGTCTTCC_13	-0.556263	Background
CAGAGAGCATCACGTA_13	-0.456671	Background
CAGAGAGGTCCATGAT_20	0.286895	Background
CAGAGAGGTCGCCATG_19	-0.151105	Background
CAGAGAGTCCACGTGG_18	0.490309	Background
CAGATCAAGAGTCGGT_13	0.28736	Background
CAGATCAAGAGTCGGT_14	0.531915	Background
CAGATCAAGATCTGCT_14	0.0286839	Background
CAGATCAAGATGGGTC_14	-0.194008	Background
CAGATCACAAACTGTC_20	0.426467	Background
CAGATCACAGAGTGTG_19	-0.133861	Background
CAGATCACATGCATGT_16	-0.077044	Background
CAGATCAGTCGGCACT_19	0.189494	Background
CAGATCAGTTCACGGC_20	0.714692	High-Risk
CAGATCAGTTTACTCT_20	0.388568	Background
CAGATCATCAGGCAAG_15	-0.235383	Background
CAGATCATCATAGCAC_19	0.107001	Background
CAGATCATCGGCATCG_13	-0.619269	Background
CAGATCATCTGTACGA_19	-0.405762	Background
CAGCAGCAGAGCCCAA_19	0.651734	High-Risk
CAGCAGCAGAGTACCG_14	-0.10914	Background
CAGCAGCAGCTGCGAA_19	-0.0530326	Background
CAGCAGCCACAGAGGT_13	-0.639668	Background
CAGCAGCCATGCCCGA_20	0.564268	High-Risk
CAGCAGCGTACTCTCC_20	0.56566	High-Risk
CAGCAGCTCAACACTG_20	0.473622	Background
CAGCATAGTGAGGGAG_18	0.151223	Background
CAGCCGAAGTACGTTC_15	0.0845284	Background
CAGCCGAAGTTTAGGA_20	0.0812318	Background
CAGCCGACAGACTCGC_20	0.0277449	Background
CAGCCGACATGTTGAC_15	0.520389	Background
CAGCCGAGTCCAGTGC_19	0.0666525	Background
CAGCCGATCCCATTTA_19	-0.0293527	Background
CAGCCGATCGTAGGAG_18	0.399475	Background
CAGCGACCACCAGATT_20	0.250815	Background
CAGCGACCAGTGGGAT_20	-0.202837	Background
CAGCGACCATAAAGGT_20	-0.312258	Background
CAGCGACGTAAGGATT_14	-0.367638	Background
CAGCGACTCCACGTTC_20	-0.280789	Background
CAGCGACTCCAGAGGA_15	0.144264	Background
CAGCGACTCCCATTAT_19	0.260992	Background
CAGCGACTCCGTCATC_19	-0.0502313	Background
CAGCGACTCGCCCTTA_19	0.384238	Background
CAGCGACTCGGTGTCG_13	0.0771133	Background
CAGCGACTCTCGCATC_20	0.389342	Background
CAGCTAAAGCGTGAAC_19	-0.000975825	Background
CAGCTAAAGCTAGTGG_15	-0.374474	Background
CAGCTAAAGGGATGGG_19	-0.282512	Background
CAGCTAAAGTTCGATC_13	-0.581901	Background
CAGCTAACAGGTCCAC_19	0.120902	Background
CAGCTAACATCCGTGG_19	0.0495497	Background
CAGCTAACATCCTTGC_20	-0.124072	Background
CAGCTAAGTCGGATCC_19	0.195416	Background
CAGCTGGAGATCTGCT_13	-0.120246	Background
CAGCTGGAGATCTGCT_14	0.149838	Background
CAGCTGGAGATGTAAC_19	-0.105904	Background
CAGCTGGAGTAGCCGA_20	0.212662	Background
CAGCTGGCAGTAGAGC_19	0.201359	Background
CAGCTGGGTCGGGTCT_15	-0.182756	Background
CAGCTGGGTGCGGTAA_19	-0.859857	Background
CAGCTGGTCAATCTCT_18	-0.509988	Background
CAGCTGGTCCGTTGTC_13	-0.345472	Background
CAGCTGGTCGCATGGC_19	-0.597608	Background
CAGCTGGTCGTCCAGG_20	0.317774	Background
CAGGTGCAGGACATTA_15	-0.275581	Background
CAGGTGCAGTACGACG_18	0.0839678	Background
CAGGTGCCACAGATTC_19	0.66187	High-Risk
CAGGTGCGTAGGACAC_20	0.229669	Background
CAGGTGCGTCAACATC_19	-0.0732625	Background
CAGGTGCGTGCGATAG_20	0.490006	Background
CAGTAACCAAGCGAGT_13	-0.732847	Background
CAGTAACCACAGGTTT_19	0.563557	High-Risk
CAGTAACCAGGGCATA_20	-0.000408657	Background
CAGTAACGTAAGGGCT_20	0.118536	Background
CAGTAACGTATAGTAG_20	0.243397	Background
CAGTAACGTCAGTGGA_20	0.530562	Background
CAGTAACGTCTAGGTT_19	0.330451	Background
CAGTAACTCGCCCTTA_14	-0.551444	Background
CAGTCCTAGGCTACGA_20	0.273833	Background
CAGTCCTAGGGTATCG_20	0.166984	Background
CAGTCCTGTTCGGCAC_20	0.198326	Background
CAGTCCTTCACGCATA_20	0.561109	High-Risk
CAGTCCTTCGTAGGAG_18	-0.199725	Background
CATATGGAGAAGCCCA_14	0.13724	Background
CATATGGAGAAGCCCA_15	0.0409698	Background
CATATGGAGCTAGTGG_14	-0.210128	Background
CATATGGCAAGCCGCT_19	0.191039	Background
CATATGGCAAGCGCTC_19	0.380365	Background
CATATGGCAAGCTGAG_20	0.591505	High-Risk
CATATGGCACTTCTGC_20	0.578195	High-Risk
CATATGGCATGCTGGC_19	0.0141261	Background
CATATGGTCACATGCA_19	0.207194	Background
CATATGGTCACCTTAT_20	-0.0471278	Background
CATATTCAGCAGCCTC_20	0.392017	Background
CATATTCAGTATGACA_15	-0.230151	Background
CATATTCAGTATGACA_16	0.0384777	Background
CATATTCGTAAACGCG_20	0.314256	Background
CATATTCGTAGCTGCC_14	0.0722824	Background
CATATTCGTCTAGTGT_14	-0.275662	Background
CATATTCGTGCCTTGG_19	0.345282	Background
CATCAAGCAGATCCAT_15	0.294803	Background
CATCAAGCATCGTCGG_19	0.252013	Background
CATCAAGCATTGGGCC_19	-0.203491	Background
CATCAAGGTAGAAAGG_15	-0.324604	Background
CATCAAGGTCGAATCT_19	-0.25938	Background
CATCAAGGTCGAGATG_19	-0.247105	Background
CATCAAGTCCGCATAA_20	0.696101	High-Risk
CATCAGAAGAACAATC_20	0.595142	High-Risk
CATCAGACACAGGAGT_18	0.37379	Background
CATCAGACACCGCTAG_15	0.515579	Background
CATCAGACATCGGGTC_18	-0.364295	Background
CATCAGATCCACGTGG_20	0.0374095	Background
CATCCACAGAAGGGTA_20	-0.186559	Background
CATCCACCAAACTGTC_18	0.473785	Background
CATCCACCAAAGAATC_20	-0.0153858	Background
CATCCACCAAGTAGTA_20	0.260286	Background
CATCCACCACATCTTT_19	0.328107	Background
CATCCACCACGCCAGT_19	0.500259	Background
CATCCACCAGAGTGTG_15	0.0131511	Background
CATCCACCATAAGACA_20	0.622538	High-Risk
CATCCACTCCTGCCAT_15	-0.512035	Background
CATCGAACAAGTCATC_16	0.157452	Background
CATCGAACAGGTGCCT_15	-0.0669614	Background
CATCGAAGTAAATACG_20	0.191783	Background
CATCGAAGTAATAGCA_19	0.173927	Background
CATCGAAGTCCGTTAA_19	0.117918	Background
CATCGAAGTGCCTGCA_20	0.257719	Background
CATCGAATCAGTCAGT_19	0.225847	Background
CATCGGGAGAGGGCTT_18	-0.26126	Background
CATCGGGAGTGTACCT_19	-0.120408	Background
CATCGGGCAAGTCTGT_19	0.239482	Background
CATCGGGCATATGAGA_20	0.281582	Background
CATCGGGGTACTCTCC_20	0.439469	Background
CATCGGGGTTTGACTG_15	0.370509	Background
CATCGGGTCAACCATG_20	0.231302	Background
CATCGGGTCCAGATCA_20	0.300435	Background
CATCGGGTCTGGGCCA_19	-0.199169	Background
CATCGGGTCTTGGGTA_19	0.211098	Background
CATGACAAGAGCTGCA_20	-0.0140046	Background
CATGACACAAGGCTCC_19	-0.0366341	Background
CATGACACACGCCAGT_20	0.249688	Background
CATGACACATGCCTTC_20	0.485428	Background
CATGACAGTAGAGCTG_19	-0.436509	Background
CATGACATCAACCAAC_14	-0.219688	Background
CATGACATCGCTGATA_20	0.119837	Background
CATGACATCTTACCGC_16	0.0339511	Background
CATGCCTAGAGCTTCT_19	-0.105142	Background
CATGCCTCAAATACAG_19	-0.273239	Background
CATGCCTCACACATGT_20	0.372442	Background
CATGCCTCACCCAGTG_14	-0.647327	Background
CATGCCTTCCGCGTTT_20	0.36628	Background
CATGCCTTCGGCGCAT_16	-0.012288	Background
CATGCCTTCTACGAGT_20	0.092777	Background
CATGGCGAGAGTGACC_13	-0.147252	Background
CATGGCGAGATACACA_13	0.395347	Background
CATGGCGAGCTAACTC_15	0.420309	Background
CATGGCGGTCTAAACC_20	0.0834153	Background
CATGGCGGTGTGGTTT_20	0.0518991	Background
CATGGCGTCGACGGAA_20	0.480865	Background
CATTATCCACAGGTTT_19	0.469855	Background
CATTATCGTATTCTCT_20	-0.156354	Background
CATTATCGTCTACCTC_13	-0.122646	Background
CATTATCGTTTGACTG_15	-0.140007	Background
CATTATCTCAATCTCT_20	0.408909	Background
CATTATCTCCACGACG_18	-0.590117	Background
CATTATCTCGCCTGTT_15	0.341011	Background
CATTCGCAGATATACG_18	0.113515	Background
CATTCGCAGATCCTGT_16	0.0236855	Background
CATTCGCAGGCGCTCT_14	-0.280875	Background
CATTCGCGTACGCTGC_20	0.0523001	Background
CATTCGCGTATAGGGC_14	-0.109379	Background
CATTCGCGTCAGCTAT_13	-0.168118	Background
CATTCGCGTCCTCCAT_19	0.504221	Background
CATTCGCTCACGATGT_20	0.547595	Background
CATTCGCTCCTATTCA_18	0.451505	Background
CATTCGCTCGTCGTTC_13	-0.564161	Background
CATTCGCTCTCACATT_19	-0.559849	Background
CCAATCCGTCTCATCC_19	-0.0631938	Background
CCAATCCTCAGAGGTG_20	0.476099	Background
CCAATCCTCATCGCTC_20	0.435936	Background
CCAATCCTCTACCAGA_15	0.504333	Background
CCACCTACATGATCCA_20	0.338145	Background
CCACCTAGTCCAGTAT_18	0.221817	Background
CCACCTAGTCTGCGGT_19	-0.579951	Background
CCACCTATCCCTTGTG_15	-0.21136	Background
CCACCTATCGTATCAG_20	-0.308812	Background
CCACGGAAGACAGGCT_15	0.395271	Background
CCACGGACACGCCAGT_14	0.13607	Background
CCACGGACACGCCAGT_15	-0.141426	Background
CCACGGAGTCTCTTTA_19	-0.158562	Background
CCACGGAGTGAGGCTA_14	0.446007	Background
CCACGGAGTGTCCTCT_20	0.265273	Background
CCACGGAGTTCTGTTT_20	-0.564064	Background
CCACGGATCATCACCC_20	0.393309	Background
CCACGGATCCATGCTC_15	-0.0160978	Background
CCACGGATCCCTCTTT_20	-0.195176	Background
CCACGGATCGTATCAG_20	0.213184	Background
CCACGGATCGTGTAGT_13	-0.266779	Background
CCACTACAGACTTTCG_18	0.576492	High-Risk
CCACTACAGAGGTACC_19	0.528195	Background
CCACTACAGTGACATA_14	-0.133655	Background
CCACTACCAACTGCGC_20	0.195678	Background
CCACTACCAGCCACCA_19	0.00923509	Background
CCACTACCATTCTCAT_20	0.507891	Background
CCACTACGTACCTACA_15	0.334262	Background
CCACTACGTGAAGGCT_20	0.317356	Background
CCACTACGTGTTCGAT_20	-0.119934	Background
CCACTACGTTCACCTC_20	0.286842	Background
CCACTACTCCTGTAGA_18	0.583555	High-Risk
CCACTACTCGTTACAG_19	-0.598073	Background
CCAGCGAAGCCATCGC_16	0.291953	Background
CCAGCGAAGCGTTCCG_19	-0.261437	Background
CCAGCGAAGTATGACA_14	-0.278993	Background
CCAGCGACAAATCCGT_20	0.379198	Background
CCAGCGACACATGTGT_18	-0.501119	Background
CCAGCGAGTATAGTAG_19	-0.494478	Background
CCAGCGAGTCGCTTCT_20	0.240752	Background
CCAGCGAGTTATGTGC_20	0.305253	Background
CCAGCGAGTTTGGGCC_20	-0.114359	Background
CCAGCGATCCAAAGTC_20	0.466607	Background
CCATGTCAGAAACCGC_19	-0.0272935	Background
CCATGTCAGGACACCA_20	0.401245	Background
CCATGTCAGGTGACCA_20	0.329458	Background
CCATGTCAGTCACGCC_20	0.0289893	Background
CCATGTCAGTCCTCCT_20	0.492901	Background
CCATGTCAGTGTGAAT_19	-0.192686	Background
CCATGTCCAATAGCAA_14	-0.404837	Background
CCATGTCGTCTCTCTG_15	0.449738	Background
CCATGTCGTGCTGTAT_15	0.000512488	Background
CCATGTCGTTAGAACA_19	-0.230309	Background
CCATGTCTCACGCGGT_15	0.473892	Background
CCATGTCTCCTCTAGC_19	0.189351	Background
CCATTCGAGACACTAA_15	0.23059	Background
CCATTCGAGCAGCGTA_13	0.0750145	Background
CCATTCGAGGGAACGG_14	-0.288738	Background
CCATTCGAGGTGACCA_13	-0.119145	Background
CCATTCGAGGTGACCA_14	0.0269797	Background
CCATTCGCAACTGCTA_15	0.0221749	Background
CCATTCGCAAGTAATG_20	0.445855	Background
CCATTCGCACGGTGTC_15	-0.0575785	Background
CCATTCGCAGGCTGAA_20	-0.357058	Background
CCATTCGTCTACTCAT_19	-0.45897	Background
CCATTCGTCTCCCTGA_19	0.153884	Background
CCCAATCAGGTGATAT_20	0.356989	Background
CCCAATCAGTGTTTGC_15	0.247494	Background
CCCAATCCAGCATACT_19	-0.591202	Background
CCCAATCGTACTTAGC_15	0.16615	Background
CCCAATCGTCATCCCT_13	-0.399242	Background
CCCAATCGTCGGCACT_15	0.101773	Background
CCCAATCTCTTTAGGG_19	0.409796	Background
CCCAGTTAGACTTGAA_14	0.511065	Background
CCCAGTTAGGTAAACT_19	0.579999	High-Risk
CCCAGTTAGTACGCGA_15	-0.0161096	Background
CCCAGTTAGTGACTCT_20	0.31083	Background
CCCAGTTCATCGGGTC_20	0.249761	Background
CCCAGTTGTCCCTACT_14	-0.338612	Background
CCCAGTTGTTAAGAAC_19	0.136331	Background
CCCAGTTTCCCTTGCA_15	0.518432	Background
CCCATACAGTCCCACG_18	0.303895	Background
CCCATACCAATCGGTT_19	0.711822	High-Risk
CCCATACCACGAAGCA_19	-0.442105	Background
CCCATACGTCTAAAGA_19	0.510268	Background
CCCATACGTCTAACGT_14	-0.0826092	Background
CCCATACGTCTCAACA_20	0.141267	Background
CCCATACGTGGTCTCG_14	-0.188224	Background
CCCATACTCAGCTCGG_18	0.204006	Background
CCCTCCTAGCTATGCT_19	0.173552	Background
CCCTCCTCAAGCGCTC_19	0.302181	Background
CCCTCCTGTCTGGTCG_15	0.366462	Background
CCCTCCTTCAACGCTA_15	0.376427	Background
CCCTCCTTCGGCTACG_13	-0.377269	Background
CCGGGATAGAGTAATC_19	0.614119	High-Risk
CCGGGATAGATATGCA_20	0.304643	Background
CCGGGATAGTCGAGTG_20	0.623757	High-Risk
CCGGGATCAACTGCTA_19	-0.338342	Background
CCGGGATCAAGCCCAC_20	0.245251	Background
CCGGGATCAGACGCCT_15	0.355178	Background
CCGGGATCAGACGCTC_14	-0.174009	Background
CCGGGATGTACAAGTA_20	0.532497	Background
CCGGGATGTCCAGTAT_18	0.293542	Background
CCGGGATGTTACGACT_20	0.285915	Background
CCGGGATGTTTGCATG_20	0.208798	Background
CCGGTAGAGAAACCTA_20	-0.416044	Background
CCGGTAGAGCACCGTC_19	-0.582047	Background
CCGGTAGCACCCATTC_19	-0.198968	Background
CCGGTAGGTACCCAAT_15	0.114235	Background
CCGGTAGGTCATTAGC_20	-0.14888	Background
CCGGTAGTCGGTCTAA_19	-0.171317	Background
CCGTACTAGAGTAAGG_19	0.631623	High-Risk
CCGTACTAGCACACAG_20	-0.12316	Background
CCGTACTCAATGGAGC_19	0.177957	Background
CCGTACTCACAAGTAA_13	0.00592562	Background
CCGTACTCACAAGTAA_14	0.411253	Background
CCGTACTCACCATGTA_20	0.297225	Background
CCGTACTCAGTCGATT_14	-0.558383	Background
CCGTACTCATCATCCC_15	0.41971	Background
CCGTACTGTCGCCATG_20	0.475066	Background
CCGTACTGTGATAAGT_20	0.102255	Background
CCGTACTGTTTAGGAA_13	-0.346688	Background
CCGTGGAAGAAGATTC_20	0.351515	Background
CCGTGGAAGCCACGTC_13	-0.481183	Background
CCGTGGACAATAAGCA_19	0.238121	Background
CCGTGGACATAGGATA_18	-0.214739	Background
CCGTGGACATGCCCGA_19	0.223917	Background
CCGTGGAGTACCCAAT_14	-0.698135	Background
CCGTGGAGTATATCCG_16	-0.126281	Background
CCGTGGAGTTAGGGTG_13	-0.391433	Background
CCGTGGAGTTAGGGTG_14	-0.251657	Background
CCGTGGAGTTCCACAA_19	0.808169	High-Risk
CCGTGGATCAAAGACA_15	-0.425404	Background
CCGTGGATCTGGCGTG_19	-0.213885	Background
CCGTTCAAGACAATAC_20	0.0898903	Background
CCGTTCAAGAGCTGCA_20	0.397011	Background
CCGTTCAAGGCAATTA_14	-0.510752	Background
CCGTTCAAGGCTACGA_19	0.277338	Background
CCGTTCAAGTAGATGT_19	0.51184	Background
CCGTTCAGTCACCTAA_20	-0.2034	Background
CCGTTCATCACATAGC_20	0.219396	Background
CCGTTCATCCGCAGTG_20	0.437245	Background
CCGTTCATCCTAGTGA_20	0.132702	Background
CCGTTCATCGATCCCT_20	0.220263	Background
CCGTTCATCGCCGTGA_13	-0.173234	Background
CCGTTCATCGCCGTGA_14	-0.358699	Background
CCTAAAGAGCAGGTCA_20	0.0727141	Background
CCTAAAGAGTAATCCC_20	-0.342964	Background
CCTAAAGAGTGTGAAT_18	0.586984	High-Risk
CCTAAAGCACTTAAGC_14	0.0306607	Background
CCTAAAGGTAGAGCTG_19	-0.102164	Background
CCTAAAGGTTTCCACC_15	-0.0130282	Background
CCTAAAGTCCTTTCGG_13	-0.151629	Background
CCTAAAGTCCTTTCGG_14	-0.381161	Background
CCTAAAGTCTACTTAC_20	0.31655	Background
CCTACACAGAACTCGG_15	0.583913	High-Risk
CCTACACAGACTAGGC_13	-0.48249	Background
CCTACACAGAGCCTAG_19	0.00863284	Background
CCTACACAGAGGTTAT_20	-0.00718706	Background
CCTACACAGCCGCCTA_15	0.201064	Background
CCTACACAGGAGCGTT_15	0.203001	Background
CCTACACAGTGACATA_19	-0.138658	Background
CCTACACCACCATGTA_20	0.184621	Background
CCTACACCACCCATGG_15	0.308548	Background
CCTACACCACCCATGG_16	0.0370791	Background
CCTACACGTGTCGCTG_20	0.241143	Background
CCTACACGTTGACGTT_14	0.484555	Background
CCTACACGTTGACGTT_15	0.522874	Background
CCTACACTCCGTTGTC_15	-0.338224	Background
CCTACCAAGCCAGAAC_19	0.508	Background
CCTACCAAGGAGCGAG_15	-0.156415	Background
CCTACCAAGTAGCGGT_20	0.387478	Background
CCTACCACAAACTGCT_20	0.132393	Background
CCTACCACAGCTTAAC_20	-0.656891	Background
CCTACCACATGCTGGC_20	0.151554	Background
CCTACCAGTCCAGTAT_20	-0.416555	Background
CCTACCAGTCTTCGTC_18	-0.24546	Background
CCTACCAGTTCTGTTT_20	0.300389	Background
CCTACCAGTTTGACAC_14	-0.578441	Background
CCTACCATCCAACCAA_14	0.417488	Background
CCTACCATCTTAACCT_19	0.212317	Background
CCTACCATCTTCGAGA_20	-0.125512	Background
CCTAGCTAGACAGAGA_18	-0.0266208	Background
CCTAGCTCAGCCTTTC_14	-0.31194	Background
CCTAGCTGTACAGTGG_20	0.502587	Background
CCTAGCTGTCCTGCTT_18	0.414354	Background
CCTAGCTGTGATAAGT_15	-0.0661588	Background
CCTAGCTGTGTGGCTC_13	-0.284881	Background
CCTAGCTGTTCTGTTT_13	-0.328318	Background
CCTAGCTGTTGATTGC_20	-0.444385	Background
CCTAGCTTCCAAGTAC_14	0.305079	Background
CCTAGCTTCCAAGTAC_15	0.345159	Background
CCTATTACAAAGAATC_19	0.24326	Background
CCTATTACACCAGGCT_18	0.057089	Background
CCTATTAGTATTCTCT_16	-0.17993	Background
CCTATTAGTTACGCGC_20	0.253475	Background
CCTATTATCATAAAGG_15	-0.0991157	Background
CCTCAGTAGCCGTCGT_19	0.258938	Background
CCTCAGTAGGGCTTGA_19	-0.234775	Background
CCTCAGTCACCGTTGG_15	0.427404	Background
CCTCAGTTCAAGATCC_19	-0.216922	Background
CCTCAGTTCATCTGTT_20	0.462282	Background
CCTCTGAAGCAGCCTC_20	0.27373	Background
CCTCTGAAGCTGAAAT_20	-0.366858	Background
CCTCTGAAGTCAAGGC_20	0.0784111	Background
CCTCTGAAGTTCGCAT_19	-0.165691	Background
CCTCTGAGTATGGTTC_20	0.0204205	Background
CCTCTGAGTGTCCTCT_20	0.236843	Background
CCTCTGAGTTCCTCCA_19	-0.521272	Background
CCTCTGATCAGCTTAG_14	-0.319377	Background
CCTCTGATCTGTACGA_20	-0.354336	Background
CCTTACGAGGGCATGT_14	0.0698771	Background
CCTTACGAGTCGCCGT_19	0.409634	Background
CCTTACGCAGGCTGAA_20	-0.0144841	Background
CCTTACGGTGAGTGAC_13	-0.62926	Background
CCTTACGTCTCTGAGA_19	0.558358	High-Risk
CCTTCCCAGAGTAATC_20	0.227944	Background
CCTTCCCAGATCTGAA_18	0.360831	Background
CCTTCCCCAATCAGAA_18	0.652408	High-Risk
CCTTCCCCACTCTGTC_19	0.440001	Background
CCTTCCCTCCAAACAC_20	0.25766	Background
CCTTCCCTCCAGATCA_13	-0.113148	Background
CCTTCCCTCGATCCCT_20	0.294509	Background
CCTTCCCTCGTGGACC_19	-0.199496	Background
CCTTCCCTCTGTCTAT_14	-0.407415	Background
CCTTCGAAGGAGTTGC_15	-0.0681275	Background
CCTTCGACACATTTCT_14	-0.311206	Background
CCTTCGACACCATCCT_18	0.156194	Background
CCTTCGACAGTAAGCG_19	-0.448398	Background
CCTTCGAGTCCATGAT_16	0.0590473	Background
CCTTCGATCGAATGGG_20	0.214633	Background
CCTTCGATCGGTCTAA_13	0.415293	Background
CCTTCGATCTGACCTC_20	0.0304309	Background
CCTTCGATCTTCCTTC_20	0.130719	Background
CCTTTCTAGACAGAGA_18	-0.266643	Background
CCTTTCTAGAGTAAGG_19	0.220313	Background
CCTTTCTAGCACCGCT_19	-0.319641	Background
CCTTTCTAGTTTGCGT_20	0.0657943	Background
CCTTTCTCAAGACACG_15	0.0648007	Background
CCTTTCTCACCTGGTG_14	-0.102148	Background
CCTTTCTGTAGCAAAT_19	-0.0440149	Background
CCTTTCTGTCTAGTCA_14	-0.438802	Background
CCTTTCTGTTACGCGC_20	0.315153	Background
CCTTTCTTCAAACCGT_15	0.265936	Background
CCTTTCTTCACGCATA_20	-0.382985	Background
CCTTTCTTCCCATTAT_20	0.372925	Background
CCTTTCTTCTCCGGTT_20	0.494957	Background
CCTTTCTTCTGGCGAC_20	0.563068	High-Risk
CGAACATAGCTCAACT_15	0.190855	Background
CGAACATCAGATCTGT_20	0.170704	Background
CGAACATCAGTATGCT_20	0.38488	Background
CGAACATCATGCAACT_20	0.218664	Background
CGAACATCATGTAAGA_20	0.295376	Background
CGAACATGTACCGTAT_18	0.461312	Background
CGAACATGTATAATGG_19	-0.579895	Background
CGAACATTCGGTCTAA_20	0.447461	Background
CGAACATTCGTCCAGG_20	0.13715	Background
CGAATGTAGACTAGGC_15	-0.0462531	Background
CGAATGTAGTGACATA_20	0.476722	Background
CGAATGTCATACAGCT_19	0.402431	Background
CGAATGTCATATGAGA_19	0.198746	Background
CGAATGTGTCAGCTAT_20	0.082149	Background
CGAATGTGTTCGTGAT_15	0.353433	Background
CGAATGTTCAACGCTA_15	0.480311	Background
CGAATGTTCAATAAGG_19	-0.426825	Background
CGACCTTAGATCCCGC_20	0.0494214	Background
CGACCTTAGCACACAG_13	0.0947006	Background
CGACCTTAGCACACAG_14	0.00462472	Background
CGACCTTAGTGAATTG_20	0.110046	Background
CGACCTTCACCCTATC_20	0.296166	Background
CGACCTTCACCTGGTG_20	0.142838	Background
CGACCTTCATAGTAAG_20	0.270107	Background
CGACCTTGTCTCGTTC_15	-0.302657	Background
CGACCTTGTGTTGAGG_13	-0.552789	Background
CGACCTTGTTAAGAAC_20	0.212049	Background
CGACCTTGTTTAGCTG_19	-0.569532	Background
CGACTTCAGCGATATA_20	0.399922	Background
CGACTTCAGGTGCAAC_14	0.145677	Background
CGACTTCCACTGTGTA_20	0.0959313	Background
CGACTTCCAGGGTTAG_14	0.0370938	Background
CGACTTCCAGTATCTG_20	0.32008	Background
CGACTTCTCAGGCGAA_19	0.400694	Background
CGACTTCTCTGGCGTG_19	0.0503786	Background
CGAGAAGAGGAGTAGA_19	-0.426482	Background
CGAGAAGAGTCCAGGA_13	-0.326367	Background
CGAGAAGAGTGAAGAG_20	-0.111549	Background
CGAGAAGAGTGGGATC_18	0.127928	Background
CGAGAAGCACAACGCC_19	-0.158185	Background
CGAGAAGCACATCTTT_16	-0.0141049	Background
CGAGAAGGTACCGAGA_19	0.561284	High-Risk
CGAGAAGGTCCATGAT_20	0.487706	Background
CGAGAAGTCACGCGGT_13	-0.230333	Background
CGAGAAGTCCACGCAG_20	0.21818	Background
CGAGAAGTCGTAGGAG_14	-0.147059	Background
CGAGAAGTCGTTGACA_18	-0.524055	Background
CGAGCACAGCAGGCTA_20	-0.2318	Background
CGAGCACAGGGAGTAA_20	0.184549	Background
CGAGCACAGTTTAGGA_20	0.142529	Background
CGAGCACCAAATACAG_16	0.0257435	Background
CGAGCACGTCTCTCTG_14	0.333829	Background
CGAGCACGTTGGTTTG_14	-0.654999	Background
CGAGCACTCACATACG_18	0.249417	Background
CGAGCACTCGTTGACA_18	0.0886954	Background
CGAGCCAAGAACTGTA_20	0.366417	Background
CGAGCCAAGCGATCCC_20	-0.267324	Background
CGAGCCAAGCGATGAC_20	0.240316	Background
CGAGCCACAGAAGCAC_13	-0.145543	Background
CGAGCCACAGAAGCAC_14	-0.0702624	Background
CGAGCCACAGTTAACC_15	0.476521	Background
CGAGCCAGTCGAATCT_20	0.206476	Background
CGAGCCAGTCGCTTCT_18	-0.680659	Background
CGAGCCAGTTAGGGTG_18	0.331684	Background
CGAGCCATCAACACTG_16	-0.0522166	Background
CGATCGGAGCTAGTTC_18	0.686235	High-Risk
CGATCGGAGGGAGTAA_13	0.222899	Background
CGATCGGAGGGAGTAA_14	-0.206232	Background
CGATCGGCAATCCAAC_13	-0.124985	Background
CGATCGGGTCGATTGT_19	0.174736	Background
CGATCGGGTGTGACCC_19	0.489021	Background
CGATCGGGTTGTCGCG_20	-0.0391587	Background
CGATCGGTCGAGCCCA_19	0.656101	High-Risk
CGATGGCAGCGATATA_18	0.289272	Background
CGATGGCAGGGTTTCT_20	-0.0592659	Background
CGATGGCCACAACGTT_19	-0.0134316	Background
CGATGGCCACATTTCT_19	0.455776	Background
CGATGGCCACGGTAAG_13	-0.498947	Background
CGATGGCGTAAGTTCC_18	0.300253	Background
CGATGGCGTCCGTTAA_20	0.0884109	Background
CGATGGCGTGAAATCA_15	0.490473	Background
CGATGGCGTGATGTGG_20	-0.181174	Background
CGATGGCTCGTCACGG_19	0.48633	Background
CGATGTAAGGAATTAC_15	-0.310625	Background
CGATGTAAGTAGCGGT_13	-0.329812	Background
CGATGTACATGCGCAC_14	-0.30171	Background
CGATGTACATTCTTAC_15	0.477894	Background
CGATGTAGTCCGCTGA_19	0.187181	Background
CGATGTAGTCTAGTGT_14	0.56651	High-Risk
CGATGTAGTTGAGTTC_13	-0.474511	Background
CGATGTATCTCAAACG_18	0.489694	Background
CGATTGACAATTGCTG_19	0.187255	Background
CGATTGATCAACGCTA_20	0.382548	Background
CGATTGATCGCGTAGC_19	0.222116	Background
CGATTGATCGTACGGC_15	0.320387	Background
CGCCAAGAGCGTGAAC_15	0.0887605	Background
CGCCAAGAGGAATTAC_19	0.44372	Background
CGCCAAGCAAGAGGCT_19	0.0730042	Background
CGCCAAGCAAGCCATT_13	-0.167463	Background
CGCCAAGCAGTAGAGC_20	0.387374	Background
CGCCAAGGTCGCATCG_19	0.459304	Background
CGCCAAGGTCTCCCTA_19	-0.710423	Background
CGCCAAGGTTGTGGAG_14	-0.0851212	Background
CGCCAAGTCATGTGGT_20	0.412749	Background
CGCGGTAAGTCTCGGC_20	0.384058	Background
CGCGGTAAGTTCCACA_15	0.527212	Background
CGCGGTAAGTTGCAGG_19	-0.147605	Background
CGCGGTAAGTTTAGGA_20	0.144645	Background
CGCGGTACACGACGAA_13	0.0807213	Background
CGCGGTACATCTACGA_20	0.373734	Background
CGCGGTAGTTAAAGAC_18	0.0127187	Background
CGCGGTATCATGCATG_14	-0.0680346	Background
CGCGGTATCCGCTGTT_20	0.182716	Background
CGCGGTATCCGTTGCT_13	-0.408674	Background
CGCGGTATCGCGTTTC_18	0.389513	Background
CGCGTTTAGACTAGGC_19	-0.0279166	Background
CGCGTTTAGATCGATA_18	0.281159	Background
CGCGTTTAGTGAACAT_13	-0.374558	Background
CGCGTTTGTAAAGTCA_20	0.508653	Background
CGCGTTTGTCGAATCT_20	0.129899	Background
CGCGTTTTCTGTTGAG_19	0.43127	Background
CGCTATCAGACGCAAC_13	-0.572411	Background
CGCTATCCAAATCCGT_19	0.224502	Background
CGCTGGACATACTCTT_20	0.612862	High-Risk
CGCTGGACATCTATGG_19	0.288968	Background
CGCTGGAGTCGCGGTT_19	-0.214302	Background
CGCTGGATCAAACAAG_15	0.412316	Background
CGCTGGATCGTCCAGG_15	0.551977	High-Risk
CGCTTCAAGCTGAACG_14	-0.214232	Background
CGCTTCAAGGACCACA_20	0.0461277	Background
CGCTTCAAGTAATCCC_20	0.390914	Background
CGCTTCACAGGAACGT_20	0.316818	Background
CGCTTCACATCGGTTA_13	-0.100053	Background
CGCTTCACATCGGTTA_14	-0.0202049	Background
CGCTTCACATTCACTT_20	0.324628	Background
CGCTTCAGTACCTACA_15	-0.184776	Background
CGCTTCAGTACGCTGC_20	-0.0279787	Background
CGCTTCAGTCTAGCCG_15	-0.410554	Background
CGCTTCAGTCTCACCT_19	-0.432602	Background
CGCTTCAGTGAAAGAG_19	-0.0475544	Background
CGCTTCAGTTACCAGT_18	-0.169733	Background
CGCTTCATCACAGGCC_20	0.550088	Background
CGCTTCATCGCTTGTC_18	0.5278	Background
CGGACACAGCCTTGAT_13	-0.329394	Background
CGGACACCAAACAACA_14	-0.0987867	Background
CGGACACCAGACGCCT_20	-0.36396	Background
CGGACACCATACTACG_20	0.201924	Background
CGGACACGTAATTGGA_18	0.158595	Background
CGGACACGTTCCAACA_20	0.286602	Background
CGGACGTAGGAGTTGC_20	0.283506	Background
CGGACGTAGTCACGCC_18	0.379307	Background
CGGACGTCACGTAAGG_19	0.0330702	Background
CGGACGTCACTATCTT_15	0.0981012	Background
CGGACGTCAGATAATG_20	0.324988	Background
CGGACGTCATCCCATC_14	-0.300121	Background
CGGACGTCATGAAGTA_20	0.213971	Background
CGGACGTGTTCTGAAC_20	-0.40627	Background
CGGACGTTCATGCAAC_13	0.559335	High-Risk
CGGACTGCACGCCAGT_14	-0.00460985	Background
CGGACTGCAGTTTACG_20	0.119732	Background
CGGACTGGTAAACCTC_13	-0.593985	Background
CGGACTGGTACCCAAT_13	-0.215261	Background
CGGACTGGTAGAGCTG_18	-0.24484	Background
CGGACTGGTCCGTGAC_14	-0.202705	Background
CGGACTGGTCGGCACT_20	0.210933	Background
CGGACTGTCAACTCTT_20	-0.0845689	Background
CGGACTGTCGCCATAA_19	0.481517	Background
CGGACTGTCTGTCTCG_20	0.177724	Background
CGGACTGTCTTACCGC_18	-0.57636	Background
CGGAGCTCACGGCTAC_20	0.110716	Background
CGGAGCTCAGCCTGTG_15	0.69361	High-Risk
CGGAGCTGTACGCACC_20	-0.541086	Background
CGGAGCTGTACTCGCG_19	0.160159	Background
CGGAGCTGTATAAACG_20	0.163483	Background
CGGAGCTTCATCACCC_19	0.272578	Background
CGGAGCTTCATCTGTT_15	-0.108189	Background
CGGAGCTTCTCGGACG_18	0.51501	Background
CGGAGTCCACGGATAG_19	0.143763	Background
CGGAGTCCAGGGATTG_20	0.154131	Background
CGGAGTCGTCGGGTCT_20	0.283918	Background
CGGAGTCGTTAAGACA_19	0.470382	Background
CGGAGTCTCACCATAG_20	-0.0358633	Background
CGGAGTCTCGCTTAGA_15	0.354151	Background
CGGCTAGAGAGCTGGT_19	0.0268139	Background
CGGCTAGAGCCGATTT_18	0.391724	Background
CGGCTAGAGGAATTAC_18	0.263517	Background
CGGCTAGAGGGATACC_15	0.448373	Background
CGGCTAGAGTTCCACA_13	-0.360779	Background
CGGCTAGCAGGTGCCT_20	0.216925	Background
CGGCTAGGTAATTGGA_18	0.596678	High-Risk
CGGCTAGGTGAGCGAT_20	0.281757	Background
CGGCTAGGTTTGACTG_20	-0.0510346	Background
CGGCTAGTCATCGATG_20	0.0946616	Background
CGGCTAGTCCAGGGCT_19	-0.0934642	Background
CGGGTCAAGACCTAGG_19	0.281947	Background
CGGGTCAAGGGTTCCC_19	0.0977064	Background
CGGGTCAAGTTAGCGG_20	0.305701	Background
CGGGTCACAGACGTAG_19	-0.0685446	Background
CGGGTCACAGAGTGTG_15	0.349996	Background
CGGGTCACAGCGAACA_19	-0.402205	Background
CGGGTCACAGCTGCAC_19	0.268246	Background
CGGGTCACATCCTTGC_19	0.0967006	Background
CGGGTCAGTCTTGATG_19	0.120296	Background
CGGGTCAGTTGCCTCT_14	-0.229807	Background
CGGGTCATCGCTTAGA_20	0.226902	Background
CGGGTCATCTCTAAGG_19	0.292802	Background
CGGGTCATCTGCCAGG_18	0.350287	Background
CGGTTAACAAAGCGGT_20	-0.611857	Background
CGGTTAACAACTTGAC_19	0.12859	Background
CGGTTAACACCGAAAG_13	-0.268597	Background
CGGTTAACAGCCTGTG_20	0.463465	Background
CGGTTAACATACTCTT_20	0.148662	Background
CGGTTAAGTAACGTTC_13	-0.501792	Background
CGGTTAAGTATAGGGC_20	0.429872	Background
CGGTTAAGTCGACTAT_13	-0.138057	Background
CGGTTAAGTCTGATTG_19	0.065881	Background
CGTAGCGAGAATCTCC_19	0.479858	Background
CGTAGCGAGCAGACTG_20	0.0878284	Background
CGTAGCGAGGAATCGC_20	0.366426	Background
CGTAGCGCATTATCTC_19	0.241277	Background
CGTAGCGGTGTTGAGG_16	0.306845	Background
CGTAGCGTCCTGCCAT_20	0.0787212	Background
CGTAGCGTCGCAAGCC_13	0.0500974	Background
CGTAGGCCATCGGAAG_19	-0.43904	Background
CGTAGGCCATTTCAGG_20	0.232616	Background
CGTAGGCTCAACTCTT_19	-0.505954	Background
CGTAGGCTCCTCATTA_15	0.456501	Background
CGTCACTAGCTAGGCA_20	0.034964	Background
CGTCACTAGGGAAACA_15	-0.280586	Background
CGTCACTAGTGGAGTC_19	0.327648	Background
CGTCACTCAGGCTGAA_15	0.496686	Background
CGTCACTGTAAGCACG_20	0.338778	Background
CGTCACTGTAGAGCTG_15	0.398875	Background
CGTCACTGTCGCGAAA_19	-0.332369	Background
CGTCACTGTGGCAAAC_14	-0.00278549	Background
CGTCACTGTTGGGACA_20	0.336682	Background
CGTCAGGAGACAGGCT_18	-0.0889595	Background
CGTCAGGAGCGTAGTG_15	-0.155531	Background
CGTCAGGAGGCCGAAT_15	-0.182412	Background
CGTCAGGAGGTTACCT_19	0.381207	Background
CGTCAGGCAGGTGCCT_20	0.318441	Background
CGTCAGGGTAGAAGGA_15	0.36198	Background
CGTCAGGGTCGAGATG_19	0.268767	Background
CGTCAGGGTCTCGTTC_13	-0.0402149	Background
CGTCAGGGTCTCGTTC_14	-0.188049	Background
CGTCCATAGAGGTTGC_20	0.1901	Background
CGTCCATAGGGATGGG_20	-0.48749	Background
CGTCCATCAAGACGTG_20	-0.0680764	Background
CGTCCATCACCGATAT_19	0.214803	Background
CGTCCATTCACTGGGC_20	0.222276	Background
CGTCCATTCGGCGCTA_20	-0.0491793	Background
CGTCTACAGCTGGAAC_20	0.19353	Background
CGTCTACAGGTGTTAA_19	0.408307	Background
CGTCTACCAATTGCTG_20	0.309575	Background
CGTCTACCATCCCACT_20	0.331489	Background
CGTCTACGTCATGCAT_19	-0.400949	Background
CGTCTACTCATGTCTT_19	0.200609	Background
CGTGAGCAGAGTCGGT_15	0.441435	Background
CGTGAGCAGTGAATTG_16	-0.158554	Background
CGTGAGCCAATGACCT_16	0.259855	Background
CGTGAGCGTACATCCA_20	0.0026261	Background
CGTGAGCGTATAGGTA_20	-0.038593	Background
CGTGAGCTCGAACGGA_20	0.213847	Background
CGTGTAAAGATATGCA_20	-0.298971	Background
CGTGTAAAGCGTGAGT_20	-0.290761	Background
CGTGTAACACAGAGGT_19	-0.3908	Background
CGTGTAACAGTACACT_15	0.00655525	Background
CGTGTCTAGAAAGTGG_14	0.00978756	Background
CGTGTCTAGGCATGTG_15	-0.0633657	Background
CGTGTCTAGTTGAGAT_13	-0.42741	Background
CGTGTCTCACCGGAAA_14	0.348308	Background
CGTGTCTCAGATAATG_19	-0.0237276	Background
CGTGTCTCAGTCCTTC_15	0.475121	Background
CGTGTCTGTAAGAGAG_19	0.564864	High-Risk
CGTGTCTTCCACTCCA_16	0.00457674	Background
CGTTAGACAAGCTGAG_20	0.0267276	Background
CGTTAGACATCACGAT_20	-0.0188535	Background
CGTTCTGAGTCCCACG_18	0.0164761	Background
CGTTCTGAGTGAACAT_14	0.525167	Background
CGTTCTGAGTGTTGAA_15	0.0433812	Background
CGTTCTGCATGCCCGA_19	0.226997	Background
CGTTCTGGTAGTGAAT_13	0.248962	Background
CGTTCTGGTAGTGAAT_14	0.404796	Background
CGTTCTGGTCTAGTCA_19	0.199775	Background
CGTTCTGGTCTCATCC_13	-0.390767	Background
CGTTCTGTCACGATGT_15	-0.130634	Background
CGTTCTGTCGAGGTAG_18	0.397305	Background
CGTTCTGTCGCCGTGA_14	0.426902	Background
CGTTGGGAGGAGTTTA_20	-0.194814	Background
CGTTGGGAGGATGGAA_15	-0.0806809	Background
CGTTGGGAGGCGCTCT_19	-0.241191	Background
CGTTGGGCAGTCAGAG_20	-0.363446	Background
CGTTGGGCATATACGC_19	-0.0637452	Background
CGTTGGGTCCACGCAG_20	0.245098	Background
CGTTGGGTCGAACGGA_18	0.0818362	Background
CGTTGGGTCTTTACAC_13	0.187037	Background
CTAACTTAGAGGTTAT_15	0.387899	Background
CTAACTTAGCTGAACG_20	0.239351	Background
CTAACTTAGGGATGGG_15	-0.319678	Background
CTAACTTGTAGCTAAA_20	0.240716	Background
CTAACTTTCAGTACGT_20	-0.53245	Background
CTAAGACAGAGGACGG_19	0.0176605	Background
CTAAGACAGCGTAGTG_15	0.406256	Background
CTAAGACAGGATGTAT_15	-0.209483	Background
CTAAGACGTATATGGA_15	-0.119451	Background
CTAAGACGTGCGGTAA_20	0.110992	Background
CTAAGACGTTCGTGAT_20	-0.010163	Background
CTAAGACTCAACGCTA_20	0.22832	Background
CTAAGACTCACTCCTG_14	-0.103578	Background
CTAAGACTCCGAGCCA_20	0.406976	Background
CTAAGACTCGTTGACA_19	0.497991	Background
CTAATGGAGAGGGATA_20	0.0852943	Background
CTAATGGAGGAATGGA_13	0.494185	Background
CTAATGGAGGCACATG_15	0.519979	Background
CTAATGGAGTGTGGCA_13	-0.615496	Background
CTAATGGCAGGCTCAC_15	0.0703981	Background
CTAATGGGTATCGCAT_15	0.0692784	Background
CTAATGGGTATGAATG_20	0.226123	Background
CTAATGGGTTAGATGA_14	0.0890755	Background
CTAATGGTCGAGGTAG_20	-0.546328	Background
CTAATGGTCGTAGGTT_13	-0.173633	Background
CTAATGGTCGTTTGCC_19	-0.560626	Background
CTACACCAGCCAGGAT_13	-0.414288	Background
CTACACCAGCTAGCCC_13	-0.447888	Background
CTACACCGTGGTAACG_20	0.309378	Background
CTACACCTCAGCAACT_16	0.284625	Background
CTACATTAGTGGGCTA_20	0.558879	High-Risk
CTACATTCAATCCAAC_18	-0.419532	Background
CTACATTCAGGAATGC_15	-0.3408	Background
CTACATTTCCTTTACA_13	0.013561	Background
CTACATTTCTACTTAC_18	0.168768	Background
CTACATTTCTTGTCAT_19	0.522213	Background
CTACCCAAGTAGCCGA_20	0.495574	Background
CTACCCACACCAGATT_13	0.158372	Background
CTACCCACACCAGATT_14	0.392585	Background
CTACCCACACCATCCT_19	0.17749	Background
CTACCCACAGATCGGA_20	0.0154969	Background
CTACCCAGTATAGTAG_20	0.244709	Background
CTACCCAGTGTGTGCC_20	-0.435937	Background
CTACCCAGTTTAAGCC_20	0.52391	Background
CTACCCATCAACCAAC_20	0.00133634	Background
CTACCCATCCAGGGCT_20	0.558805	High-Risk
CTACGTCAGACGCAAC_19	0.0210234	Background
CTACGTCAGCCATCGC_20	-0.1828	Background
CTACGTCAGCCCTAAT_14	-0.111719	Background
CTACGTCAGCCCTAAT_20	0.227746	Background
CTACGTCAGGACTGGT_20	0.610631	High-Risk
CTACGTCCACAGTCGC_15	-0.370863	Background
CTACGTCCATCGGTTA_20	0.506125	Background
CTACGTCGTAGATTAG_18	0.132182	Background
CTACGTCGTAGGAGTC_20	0.0377459	Background
CTACGTCGTCTAGAGG_15	0.0541767	Background
CTACGTCTCGGTGTTA_18	-0.49293	Background
CTACGTCTCGTACGGC_13	0.140997	Background
CTACGTCTCGTACGGC_14	0.538225	Background
CTACGTCTCTAGCACA_15	-0.12293	Background
CTAGAGTAGCAGATCG_20	0.167134	Background
CTAGAGTAGGCTAGAC_19	-0.204472	Background
CTAGAGTAGGTAGCTG_18	-0.342394	Background
CTAGAGTGTCAAACTC_19	0.20828	Background
CTAGAGTTCATTTGGG_16	0.0257986	Background
CTAGAGTTCCCGGATG_14	0.450331	Background
CTAGAGTTCCGCATCT_14	0.0575791	Background
CTAGAGTTCGTTTAGG_15	0.480495	Background
CTAGCCTAGACACGAC_20	0.316709	Background
CTAGCCTAGGAGTACC_19	-0.315862	Background
CTAGCCTAGGTGCACA_20	0.145826	Background
CTAGCCTCAAGGACTG_19	-0.11948	Background
CTAGCCTCAAGGGTCA_15	-0.155357	Background
CTAGCCTCAGGCGATA_20	0.490126	Background
CTAGCCTCATGGTCTA_13	-0.593176	Background
CTAGCCTGTAGCTAAA_19	0.20484	Background
CTAGCCTGTCAGATAA_20	-0.121022	Background
CTAGCCTGTTCTGTTT_20	0.261304	Background
CTAGCCTTCACATAGC_19	-0.362934	Background
CTAGCCTTCTGCGGCA_19	-0.00268371	Background
CTAGCCTTCTTGCAAG_20	0.374105	Background
CTAGTGAAGACTAAGT_13	0.251925	Background
CTAGTGAAGACTAAGT_14	0.476944	Background
CTAGTGAGTAGCCTCG_19	-0.20761	Background
CTCACACAGTGACATA_13	-0.107431	Background
CTCACACCACCAGCAC_20	0.181722	Background
CTCACACCATCGATTG_19	0.216854	Background
CTCACACGTCATATGC_20	0.495418	Background
CTCACACTCAACGGCC_13	-0.234671	Background
CTCACACTCCCTCTTT_13	0.333381	Background
CTCAGAAAGCGCCTTG_20	0.349022	Background
CTCAGAAAGGATGGAA_14	-0.0461638	Background
CTCAGAAAGGCAGTCA_19	0.484981	Background
CTCAGAACAATCAGAA_14	-0.115152	Background
CTCAGAAGTACAGACG_18	-0.536195	Background
CTCAGAAGTAGCAAAT_20	-0.434338	Background
CTCAGAAGTCAAAGCG_15	0.470867	Background
CTCAGAAGTCGCATCG_13	0.0388387	Background
CTCAGAAGTCGCATCG_14	-0.316253	Background
CTCAGAAGTGGGTCAA_19	-0.271794	Background
CTCAGAAGTTGATTGC_14	0.442592	Background
CTCAGAAGTTGATTGC_15	0.437685	Background
CTCAGAATCAGTCAGT_19	-0.687674	Background
CTCAGAATCTCGATGA_13	0.45106	Background
CTCAGAATCTGTTGAG_19	0.345687	Background
CTCATTAAGAGGTACC_18	0.313248	Background
CTCATTACAGACACTT_19	-0.127487	Background
CTCATTACATCGGACC_20	0.308777	Background
CTCATTAGTTCGTTGA_20	-0.372571	Background
CTCATTATCGCATGGC_20	0.125501	Background
CTCCTAGAGTTAAGTG_20	0.527482	Background
CTCCTAGCAAGAAGAG_19	-0.444851	Background
CTCCTAGCAGGCTGAA_18	-0.214927	Background
CTCCTAGCATACTACG_20	0.387353	Background
CTCCTAGGTCGCTTTC_20	0.329598	Background
CTCCTAGGTCTCTTTA_19	0.248707	Background
CTCCTAGGTCTTCGTC_20	0.364043	Background
CTCCTAGTCAATCACG_13	0.271573	Background
CTCCTAGTCACGATGT_19	0.162835	Background
CTCCTAGTCGTAGGTT_19	0.274456	Background
CTCGAAAAGTGTACTC_20	0.43078	Background
CTCGAAACAAACTGCT_19	0.676172	High-Risk
CTCGAAACATCTACGA_14	-0.193248	Background
CTCGAAACATGCATGT_18	-0.642382	Background
CTCGAAAGTAAATGAC_19	-0.0782073	Background
CTCGAAAGTAGCGATG_15	0.522707	Background
CTCGAAAGTGCACGAA_20	0.561046	High-Risk
CTCGAAAGTGTGGCTC_15	0.229411	Background
CTCGAAATCACATACG_14	-0.627167	Background
CTCGAAATCACTTATC_20	0.262626	Background
CTCGAGGAGCAGCGTA_20	0.21144	Background
CTCGAGGAGGTCATCT_20	0.540974	Background
CTCGAGGCATCCTAGA_19	-0.17195	Background
CTCGAGGCATTGGCGC_20	-0.180294	Background
CTCGAGGGTTCCGGCA_18	0.419871	Background
CTCGAGGGTTCGAATC_20	0.286383	Background
CTCGAGGTCAGTGCAT_20	0.353583	Background
CTCGAGGTCGATGAGG_19	0.504722	Background
CTCGAGGTCTTGTACT_20	0.413408	Background
CTCGGAGCAAGAGTCG_13	0.409652	Background
CTCGGAGCACGCTTTC_14	-0.3139	Background
CTCGGAGCAGTCGATT_20	0.307413	Background
CTCGGAGGTAAAGGAG_19	0.477244	Background
CTCGGAGTCACATGCA_20	0.122094	Background
CTCGGAGTCCGGCACA_20	-0.212276	Background
CTCGGAGTCCTTGACC_20	0.594082	High-Risk
CTCGGAGTCTCCCTGA_20	0.664485	High-Risk
CTCGGGACACTTAACG_13	-0.416766	Background
CTCGGGAGTACTTCTT_13	-0.206276	Background
CTCGGGAGTCTTGATG_14	-0.423497	Background
CTCGGGATCGTCCGTT_20	0.311665	Background
CTCGTACAGAACTGTA_19	0.48797	Background
CTCGTACAGCGACGTA_20	0.327348	Background
CTCGTACGTCGCGAAA_20	0.295589	Background
CTCGTACGTTTGGCGC_19	-0.132704	Background
CTCGTACTCATCGATG_14	0.113775	Background
CTCGTACTCATCGATG_15	0.0205398	Background
CTCGTACTCGCGTTTC_18	0.321451	Background
CTCGTCAAGTGGGATC_13	0.187833	Background
CTCGTCACAATGGAGC_20	0.643835	High-Risk
CTCGTCACACAGGCCT_20	0.126559	Background
CTCGTCACACGTAAGG_19	-0.458546	Background
CTCGTCACAGTGACAG_13	-0.639632	Background
CTCGTCAGTACGACCC_15	0.214281	Background
CTCGTCAGTCCAGTGC_19	-0.453451	Background
[truncated: 2,103 more rows]

## Sheet: 2.Differential expression genes
names	scores	logfoldchanges	pvals	pvals_adj
SLC2A1	13.5419	4.06383	8.84273e-42	1.0682e-38
NDRG1	12.6957	3.85845	6.24921e-37	3.77452e-34
CA9	12.124	4.16786	7.87742e-34	3.17198e-31
BNIP3	12.0644	3.54803	1.62832e-33	4.91753e-31
PNISR	11.2009	3.13881	4.03405e-29	9.74627e-27
P4HA1	11.1493	3.3408	7.21794e-29	1.45321e-26
NDUFA4L2	11.0375	4.33608	2.51853e-28	4.34626e-26
ERO1A	10.5897	3.16079	3.3276e-26	5.02467e-24
LDHA	9.79792	2.32576	1.14927e-22	1.54257e-20
VEGFA	9.4366	3.04524	3.85055e-21	4.65146e-19
CXCR4	9.41362	2.76921	4.79333e-21	5.26394e-19
WSB1	9.21705	2.81342	3.05394e-20	3.0743e-18
PLOD2	9.13938	3.29702	6.281e-20	5.8365e-18
XIST	8.94796	3.02028	3.62099e-19	3.1244e-17
SAT1	8.77813	2.3496	1.66212e-18	1.33856e-16
KLF6	8.58419	2.37427	9.14817e-18	6.90687e-16
ENO1	8.18668	1.99098	2.68528e-16	1.90813e-14
IGBP1	8.1632	2.50427	3.26266e-16	2.18961e-14
STK4	7.88038	2.60362	3.26389e-15	2.07515e-13
BRD2	7.75964	1.98776	8.51702e-15	5.14428e-13
NUPR1	7.55023	2.1357	4.34496e-14	2.49939e-12
CAMK1D	7.50356	2.61187	6.21062e-14	3.4102e-12
SLC16A3	7.39776	2.20679	1.38502e-13	7.27437e-12
ADM	7.37594	2.90778	1.6319e-13	8.2139e-12
EGLN3	7.14225	3.01191	9.18179e-13	4.43664e-11
VIM	7.12615	2.29738	1.03217e-12	4.79561e-11
MDM4	7.11683	2.09769	1.10434e-12	4.94089e-11
FOXP1	7.10938	2.07693	1.16562e-12	5.02881e-11
SMAD2	7.0856	2.14026	1.38441e-12	5.74579e-11
HSPA1A	7.08141	2.21474	1.42693e-12	5.74579e-11
SKIL	6.98941	1.83231	2.76043e-12	1.07568e-10
ZFP36L1	6.93393	1.85678	4.09304e-12	1.54512e-10
ID2	6.90938	1.88785	4.86761e-12	1.78184e-10
JUN	6.90117	2.19784	5.15763e-12	1.83248e-10
HIST1H2AC	6.85387	2.14866	7.18776e-12	2.4808e-10
RNASET2	6.79899	1.72678	1.05355e-11	3.53524e-10
NCK1	6.77335	1.9766	1.25837e-11	4.10842e-10
GBE1	6.75918	2.86835	1.38778e-11	4.35716e-10
PMEPA1	6.75721	1.97189	1.4067e-11	4.35716e-10
HIST1H2BG	6.6099	2.05757	3.84578e-11	1.16143e-09
GALNT2	6.59008	2.11924	4.39599e-11	1.29521e-09
HYI	6.54228	1.93541	6.05877e-11	1.74262e-09
CD55	6.53619	1.68626	6.31042e-11	1.77279e-09
MAP1LC3B	6.52628	1.62394	6.74224e-11	1.85105e-09
USE1	6.4722	2.04807	9.65867e-11	2.59282e-09
NT5C3A	6.46704	1.79673	9.99388e-11	2.62448e-09
HIST2H2BE	6.44296	2.13099	1.17164e-10	3.01135e-09
FBXO32	6.41313	1.84917	1.42564e-10	3.58787e-09
NMB	6.35585	2.64458	2.07275e-10	5.10997e-09
BTG2	6.33453	1.80095	2.38064e-10	5.75163e-09
IQCB1	6.27912	1.96623	3.40499e-10	8.06516e-09
PIK3IP1	6.2112	2.7485	5.2582e-10	1.21946e-08
RND3	6.20847	1.66311	5.35026e-10	1.21946e-08
SHPRH	6.20345	2.24554	5.52391e-10	1.23572e-08
CORO1C	6.20029	1.99665	5.63597e-10	1.23786e-08
PJA2	6.12861	2.14316	8.86497e-10	1.9123e-08
DDIT3	6.05524	1.7277	1.40211e-09	2.9715e-08
VLDLR	6.04503	2.53633	1.49386e-09	3.11136e-08
SLC25A37	6.03987	1.65384	1.54238e-09	3.15797e-08
ZFP36	6.01243	1.67661	1.82763e-09	3.56533e-08
TSC22D3	6.01223	1.71811	1.82989e-09	3.56533e-08
KIAA1551	6.00159	2.50668	1.95399e-09	3.7467e-08
TOB1	5.99836	1.57289	1.9932e-09	3.76217e-08
YPEL2	5.98639	2.1206	2.14555e-09	3.98742e-08
TWF1	5.9476	1.94877	2.72097e-09	4.9802e-08
MAPK1IP1L	5.93071	1.76902	3.01634e-09	5.43841e-08
TXNIP	5.86139	1.69885	4.59008e-09	8.15414e-08
PTPRK	5.82567	2.05435	5.68847e-09	9.81667e-08
MB	5.82078	2.02418	5.85742e-09	9.96586e-08
CYP20A1	5.74521	1.87281	9.18076e-09	1.51923e-07
ANKRD37	5.7044	1.9664	1.16755e-08	1.89048e-07
FNBP1	5.7035	2.55392	1.17373e-08	1.89048e-07
DCP1A	5.70017	2.07761	1.19686e-08	1.90237e-07
PEX13	5.68551	1.6829	1.30427e-08	2.04617e-07
LRP10	5.67217	1.73399	1.41002e-08	2.18373e-07
CCNDBP1	5.6589	1.73681	1.5235e-08	2.30048e-07
BCL2L1	5.63099	1.78653	1.79178e-08	2.65082e-07
ETS2	5.63026	2.02297	1.7994e-08	2.65082e-07
QSOX1	5.60974	1.64708	2.02636e-08	2.9492e-07
USP48	5.60328	1.7518	2.10329e-08	3.02473e-07
WDR70	5.57248	1.55143	2.51133e-08	3.52755e-07
WDR60	5.5324	1.80918	3.15872e-08	4.3859e-07
MACF1	5.47526	1.71831	4.36867e-08	5.98219e-07
KIT	5.4737	2.27616	4.40741e-08	5.98219e-07
EGLN1	5.43571	2.32755	5.45776e-08	7.31428e-07
ATP6V1D	5.43402	1.50779	5.50993e-08	7.31428e-07
TLK1	5.39374	1.63553	6.90069e-08	8.96348e-07
ARFGAP3	5.38532	1.65384	7.23148e-08	9.29323e-07
PHF1	5.37531	2.12481	7.64506e-08	9.7213e-07
CLIP1	5.35951	1.65947	8.34471e-08	1.05004e-06
HILPDA	5.31873	1.68241	1.04492e-07	1.28802e-06
SMARCA2	5.31484	2.07431	1.0675e-07	1.30256e-06
PCMTD1	5.30856	1.6412	1.10497e-07	1.33481e-06
AQP5	5.28857	1.94415	1.23279e-07	1.47447e-06
PBRM1	5.25394	1.71535	1.48879e-07	1.74607e-06
TRPT1	5.20365	1.5951	1.95412e-07	2.24817e-06
HPCAL1	5.16434	1.5004	2.41295e-07	2.69893e-06
MED15	5.15	1.75729	2.60487e-07	2.88687e-06
PHLDA1	5.1351	1.57846	2.81996e-07	3.09683e-06
HSPA1B	5.10975	1.59083	3.22579e-07	3.51059e-06
IFT43	5.09079	1.54291	3.56566e-07	3.81179e-06
ATAD1	5.08587	1.7593	3.65941e-07	3.87769e-06
PPP1CB	5.06984	1.6105	3.9815e-07	4.14625e-06
RLF	5.06266	2.27806	4.13456e-07	4.26885e-06
MBNL1	5.04283	1.52123	4.58692e-07	4.69576e-06
DENND1B	5.03615	1.92182	4.74997e-07	4.82182e-06
ZFAND2B	5.03052	1.66681	4.89138e-07	4.92399e-06
BAIAP2L1	5.01589	1.68885	5.27884e-07	5.27012e-06
TINAGL1	5.00631	1.72051	5.54831e-07	5.44907e-06
BARD1	4.98762	1.70574	6.11282e-07	5.95507e-06
SHOC2	4.97322	1.81919	6.58512e-07	6.36386e-06
SH3BGRL	4.94341	1.5836	7.67662e-07	7.24481e-06
NUDT2	4.92908	1.61013	8.26183e-07	7.63413e-06
WSB2	4.92868	1.72229	8.27873e-07	7.63413e-06
INSIG2	4.90343	1.5803	9.41755e-07	8.61849e-06
TAOK3	4.89898	1.65273	9.63368e-07	8.74999e-06
CREB3	4.89266	1.54848	9.94834e-07	8.96836e-06
MIIP	4.87982	1.61468	1.06183e-06	9.29489e-06
XRN1	4.87027	1.60892	1.11444e-06	9.68523e-06
C1orf198	4.82989	1.70967	1.36606e-06	1.15192e-05
DR1	4.82886	1.65719	1.37315e-06	1.15192e-05
ATF7	4.81809	1.69486	1.44942e-06	1.20752e-05
BACE2	4.78479	1.64502	1.71165e-06	1.37773e-05
CANT1	4.77571	1.7006	1.79073e-06	1.4184e-05
C1GALT1	4.77455	1.91987	1.80112e-06	1.4184e-05
RPP30	4.77308	1.60022	1.81427e-06	1.4184e-05
SLC25A24	4.77245	1.65351	1.81997e-06	1.4184e-05
MED13L	4.74544	1.81001	2.0805e-06	1.58066e-05
ZCCHC11	4.7367	1.54552	2.17231e-06	1.64009e-05
SNHG19	4.71062	1.55321	2.46966e-06	1.85301e-05
PSEN1	4.7052	2.03754	2.5362e-06	1.89119e-05
WEE1	4.7024	1.702	2.57117e-06	1.9055e-05
STX6	4.66389	1.55171	3.10292e-06	2.26241e-05
TMEM167B	4.66129	2.0119	3.1423e-06	2.27299e-05
CTDSP1	4.65115	1.50038	3.30093e-06	2.35948e-05
TMCO3	4.60136	1.83836	4.1975e-06	2.93378e-05
CREBZF	4.58818	1.96044	4.47118e-06	3.10413e-05
CTDSPL2	4.57611	1.95415	4.737e-06	3.26988e-05
TFRC	4.57395	1.86514	4.78617e-06	3.28505e-05
DEDD2	4.52628	1.50503	6.00295e-06	3.98751e-05
CLEC2B	4.52612	2.13129	6.00768e-06	3.98751e-05
FAM129B	4.5205	1.87105	6.16944e-06	4.05037e-05
AGPAT5	4.46898	1.61638	7.85949e-06	5.0032e-05
PPM1A	4.4582	1.65567	8.26509e-06	5.22735e-05
PIM1	4.44716	1.59651	8.70143e-06	5.39042e-05
DCK	4.43036	1.65548	9.40759e-06	5.76872e-05
RHOT1	4.40362	1.51656	1.0646e-05	6.36654e-05
RPA1	4.35988	1.50223	1.30134e-05	7.5943e-05
ALOX5AP	4.34381	1.68753	1.4003e-05	8.00691e-05
CYFIP1	4.34305	1.5728	1.40519e-05	8.00691e-05
EFR3A	4.34099	1.56021	1.41844e-05	8.04449e-05
SARNP	4.33853	1.69194	1.43442e-05	8.09708e-05
FAM3A	4.33587	1.84617	1.45188e-05	8.15755e-05
XIAP	4.32974	1.62773	1.49282e-05	8.34875e-05
TTLL4	4.30816	1.67527	1.6462e-05	9.16408e-05
ITGB4	4.3052	1.79278	1.66836e-05	9.24488e-05
SPPL2A	4.29046	1.5428	1.78301e-05	9.65862e-05
PGAP2	4.28684	2.00036	1.81234e-05	9.76967e-05
HCST	4.18779	2.02985	2.81689e-05	0.000145419
MXD1	4.17555	1.66244	2.97272e-05	0.000152811
BPNT1	4.16583	1.67591	3.10217e-05	0.000157033
PSME4	4.16068	1.6441	3.17304e-05	0.000159047
SLC5A3	4.15965	1.51933	3.1874e-05	0.000159107
DSC2	4.15027	1.52164	3.32087e-05	0.000165087
CD7	4.136	1.71482	3.53415e-05	0.000174969
NEK7	4.12991	1.72356	3.62903e-05	0.000177485
NUP153	4.11977	1.81146	3.79256e-05	0.000183993
ANKRD17	4.08471	1.70393	4.4132e-05	0.000212221
ESYT2	4.08398	1.62911	4.42713e-05	0.000212221
CD52	4.08172	1.51369	4.47044e-05	0.00021261
HIST1H2AE	4.06372	1.67128	4.82964e-05	0.000225259
BRWD1	4.04609	1.53714	5.20795e-05	0.000241042
MAFB	4.00299	1.56159	6.25478e-05	0.000284052
PCF11	3.98975	1.52872	6.61433e-05	0.00029593
WDR72	3.97458	1.63307	7.05031e-05	0.000311179
U2AF1L4	3.96088	1.80741	7.46747e-05	0.000325657
TFF3	3.94544	1.91418	7.9652e-05	0.000343641
TNKS2	3.94149	1.54686	8.09781e-05	0.000344569
DNAJB14	3.94145	1.78211	8.09894e-05	0.000344569
PELI1	3.94056	1.5594	8.12932e-05	0.000344569
ZNF770	3.93899	1.72117	8.18246e-05	0.000345609
RBM26	3.90527	1.62698	9.41221e-05	0.00039072
TOP2B	3.87466	1.54082	0.000106772	0.00043722
CHMP4C	3.85823	1.58384	0.000114209	0.000458355
MAPKAP1	3.84104	1.50628	0.000122515	0.000482537
NUDT15	3.81822	1.55512	0.000134418	0.000512229
TMEM159	3.80106	1.51836	0.00014408	0.000537186
CD3D	3.79836	2.12764	0.000145654	0.000538075
IFI27L1	3.79547	1.66525	0.000147364	0.000542731
QKI	3.7657	1.82432	0.000166082	0.000602485
TTC17	3.75193	1.62194	0.000175478	0.000625301
ARSD	3.7208	1.56818	0.000198594	0.000689372
NAT9	3.68099	1.55985	0.000232335	0.000789504
ELK3	3.59507	1.55026	0.000324303	0.00105595
EPS8L1	3.57132	1.50943	0.000355183	0.00114693
NELFA	3.54744	1.57948	0.000388993	0.00123659
RALGAPB	3.50234	1.66551	0.000461193	0.00143929
RHOF	3.4885	1.54396	0.000485735	0.00149305
CD82	3.45484	1.55424	0.000550616	0.00165048
EHBP1	3.44503	1.50844	0.000570996	0.00169475
RAB9A	3.44224	1.584	0.000576927	0.00170816
INTS1	3.41509	1.74205	0.000637598	0.00185981
LRRC58	3.40562	1.54829	0.000660151	0.00191611
NKG7	3.34249	1.72948	0.000830317	0.00233805
MTFR1L	3.3348	1.60624	0.000853601	0.00238692
DST	3.31109	1.66949	0.000929343	0.00256312
CASP2	3.29605	1.55082	0.000980535	0.00267379
MIB2	3.25208	1.53696	0.00114563	0.00304159
LMCD1	3.22251	1.52649	0.00127072	0.00331578
ZNF576	3.19058	1.5662	0.00141987	0.00364161
CXCL13	3.18386	1.79337	0.00145324	0.00370574
LAPTM5	3.07806	1.55483	0.00208354	0.00509497

## Sheet: 3.SIDISH marker genes
genes	score
ERRFI1	1.9911
ENO1	1.99299
MIIP	1.99113
UBR4	1.99111
GALE	1.9911
IFI6	1.99114
TINAGL1	1.9911
SLC2A1	1.99223
CDC20	1.99118
PRDX1	1.99112
JUN	1.9917
GADD45A	1.9911
IFI44L	1.99111
GBP1	1.99111
GBP5	1.99114
SLC25A24	1.99111
TMEM167B	1.9911
TXNIP	1.99123
SPRR2D	1.99109
S100A8	1.99112
S100A7	1.99109
S100A4	1.99112
CKS1B	1.99111
TMCO1	1.99112
TOR1AIP2	1.9911
QSOX1	1.99123
BTG2	1.99111
MDM4	1.99116
CENPF	1.99112
GALNT2	1.99119
C1orf198	1.99111
ID2	1.99109
SDC1	1.99113
RHOB	1.9911
SNX17	1.99112
PPP1CB	1.99119
ZFP36L2	1.9911
PEX13	1.9911
C2orf68	1.9911
SFTPB	1.99115
CXCR4	1.99191
TLK1	1.9911
TTLL4	1.99111
ZFAND2B	1.99109
THUMPD3-AS1	1.99112
AZI2	1.99109
GLB1	1.99111
SLMAP	1.9911
FOXP1	1.9913
GBE1	1.99112
IQCB1	1.99115
DTX3L	1.9911
NCK1	1.99114
PLOD2	1.99144
UBXN7	1.9911
LAP3	1.99109
HOPX	1.99111
DCK	1.99109
CXCL10	1.99114
CXCL13	1.9911
PLAC8	1.99114
CCDC127	1.99109
PJA2	1.99113
IRF1	1.9911
EGR1	1.99109
YIPF5	1.99109
CD74	1.99122
PTTG1	1.9911
NUP153	1.9911
MRS2	1.9911
HIST1H1C	1.99109
HIST1H2BG	1.99125
HLA-A	1.99202
TUBB	1.99121
IER3	1.9911
HLA-B	1.99266
HSPA1A	1.99172
HSPA1B	1.99116
HLA-DRB1	1.99119
HLA-DMA	1.9911
BRD2	1.99115
PHF1	1.99109
VEGFA	1.99165
PNISR	1.99177
PTPRK	1.9911
WTAP	1.99115
QKI	1.99114
RNASET2	1.9912
AGR2	1.99111
NT5C3A	1.99111
SBDS	1.99114
STEAP1	1.99109
PTN	1.99109
ZC3HAV1	1.9911
PDIA4	1.9912
ARSD	1.9911
SAT1	1.99141
PLP2	1.99109
IGBP1	1.99114
XIST	1.99143
TSC22D3	1.99113
FLNA	1.99109
AGPAT5	1.99112
CLDN23	1.9911
SLC25A37	1.99118
CCDC25	1.99111
CHCHD7	1.9911
CHMP4C	1.99109
NDRG1	1.99197
SMARCA2	1.99118
VLDLR	1.9911
CA9	1.9921
GSN	1.99111
LCN2	1.99109
FNBP1	1.9911
TMEM141	1.99111
PHLDA2	1.9912
WEE1	1.99111
ADM	1.99111
SAA1	1.99115
LDHA	1.99266
TTC17	1.9911
HSD17B12	1.99112
CDK2AP2	1.99111
CCND1	1.9911
CREBZF	1.99109
CD3D	1.99115
KLF6	1.9917
CALML5	1.99111
USP6NL	1.9911
CAMK1D	1.99153
VIM	1.99122
CDK1	1.9911
SRGN	1.99119
P4HA1	1.99177
BORCS7	1.9911
PDCD4	1.99111
OAT	1.99111
BNIP3	1.99228
C1S	1.9911
C1R	1.9911
CLEC2B	1.99117
ARHGDIB	1.99113
TWF1	1.99113
TUBA1A	1.9914
AQP5	1.99112
KRT7	1.9911
PCBP2	1.9912
ATF7	1.99109
NDUFA4L2	1.99181
CORO1C	1.9911
WSB2	1.99111
TAOK3	1.99112
HSPH1	1.99113
WBP4	1.9911
TMCO3	1.99109
SFTA3	1.99126
ERO1A	1.9918
MAPK1IP1L	1.9911
ZFP36L1	1.9911
NPC2	1.99118
LGMN	1.99111
IFI27L1	1.99116
WARS	1.99116
IGHA1	1.99113
KNSTRN	1.99111
GCHFR	1.9911
SPPL2A	1.99114
TPM1	1.9911
CTSH	1.99109
NMB	1.99119
ISG20	1.9911
PDPK1	1.9911
SOCS1	1.99111
ARL6IP1	1.99111
NUPR1	1.99163
BCKDK	1.99109
PRSS8	1.9911
HERPUD1	1.99118
CKLF	1.99113
COTL1	1.9911
MAP1LC3B	1.99119
CYBA	1.99119
PFN1	1.99121
WSB1	1.99155
IFI35	1.99114
NSF	1.99109
BIRC5	1.9912
FASN	1.9911
CD7	1.99112
SMAD2	1.99115
TPX2	1.99113
STK4	1.99131
SLPI	1.99112
WFDC2	1.9911
UBE2C	1.99117
RPS28	1.99146
USE1	1.99109
HCST	1.99113
ZFP36	1.9911
SERTAD1	1.99109
CEACAM6	1.9911
NAPSA	1.99112
IGLC2	1.9911
PIK3IP1	1.99114
LGALS1	1.99114
CBY1	1.99111
TBC1D22A	1.9911
SCO2	1.9911
CSTB	1.99121
MT-ATP6	1.99124
MT-ND3	1.99114
