# Supplementary material for: SIDISH Identifies High-Risk Disease-Associated Cells and Biomarkers by Integrating Single-Cell Depth and Bulk Breadth
Source: Research Square preprint supplement (doi:10.21203/rs.3.rs-5921999/v1), 2025-03-10
Supplement: Supplementary file 9 [file fd973bf2f9c5094762e40d73.xlsx]

## Sheet: Description
Descriptions:
1. Labeled cells: Predicted risk scores and SIDISH labels for PDAC cells .
2. Differential expression genes: All the differentially expressed genes between High-Risk cells and Background cells with an adjusted P value < 0.05. The log Fold change was calculated using a two-tailed Wilcoxon rank sum test.
3. SIDISH marker genes: List of genes that were upregulated in the High-Risk cells.

## Sheet: 1.Labeled cells
Supplementary Table.1 Predicted risk scores and SIDISH labels for PDAC breast cancer cells .
	risk_value	SIDISH label
T1_AAACCTGAGATGTCGG	-0.124806	Background
T1_AAACGGGGTCATGCAT	-0.255366	Background
T1_AAAGATGCATGTTGAC	0.164436	Background
T1_AAAGATGGTCGAGTTT	0.122182	Background
T1_AAAGATGGTCTCTCTG	-0.219192	Background
T1_AAAGATGTCTTTACAC	-0.326783	Background
T1_AAAGCAAAGTGTACCT	0.125235	Background
T1_AAAGCAATCACTTCAT	-0.477355	Background
T1_AAAGTAGAGTCGTACT	0.0950942	Background
T1_AAAGTAGCATTACGAC	-0.538327	Background
T1_AAATGCCAGAAACGCC	-0.507368	Background
T1_AACACGTAGAAGGTGA	-0.423063	Background
T1_AACACGTCAATGACCT	0.105913	Background
T1_AACACGTGTCATATCG	-0.262991	Background
T1_AACACGTGTGCTGTAT	-0.161053	Background
T1_AACCATGCACAACTGT	0.172722	Background
T1_AACCATGTCTGATTCT	0.269188	High-Risk
T1_AACCATGTCTGTCCGT	0.383502	High-Risk
T1_AACCGCGGTACTCGCG	0.385059	High-Risk
T1_AACCGCGTCGAATGGG	-0.198898	Background
T1_AACGTTGCAATGGATA	-0.273855	Background
T1_AACGTTGGTACCCAAT	-0.346748	Background
T1_AACTCAGCAGCAGTTT	-0.182862	Background
T1_AACTCAGTCGTACCGG	0.169036	Background
T1_AACTCCCCACATCTTT	-0.533241	Background
T1_AACTCCCCACGAAAGC	0.0840862	Background
T1_AACTCTTAGGTAAACT	0.0556609	Background
T1_AACTCTTAGTACCGGA	-0.393688	Background
T1_AACTGGTTCTAACGGT	-0.0633928	Background
T1_AACTTTCAGGATTCGG	0.435195	High-Risk
T1_AACTTTCCAAGAAGAG	0.197049	Background
T1_AACTTTCCACACCGAC	-0.444637	Background
T1_AAGACCTAGGCGCTCT	0.0560401	Background
T1_AAGACCTAGTCATGCT	0.171939	Background
T1_AAGACCTGTCTGGTCG	-0.487766	Background
T1_AAGACCTTCATGTCCC	-0.0765361	Background
T1_AAGCCGCAGCGATATA	-0.349947	Background
T1_AAGCCGCCAGTAAGAT	0.106541	Background
T1_AAGCCGCGTAGGCATG	0.42016	High-Risk
T1_AAGGAGCAGAGCTGCA	-0.283925	Background
T1_AAGGAGCAGTGGTAGC	-0.00650124	Background
T1_AAGGAGCCAATTCCTT	-0.389898	Background
T1_AAGGAGCTCGTTGCCT	0.0449001	Background
T1_AAGGCAGAGTGGCACA	-0.237396	Background
T1_AAGGCAGTCTCTGTCG	-0.0404721	Background
T1_AAGGTTCAGTATTGGA	0.300826	High-Risk
T1_AAGGTTCCATTCTTAC	-0.595044	Background
T1_AAGGTTCGTGTCAATC	-0.343235	Background
T1_AAGGTTCTCATAAAGG	-0.0332274	Background
T1_AAGTCTGAGCAAATCA	0.116324	Background
T1_AATCCAGTCTCCTATA	-0.262047	Background
T1_AATCGGTCAAGTTAAG	-0.506745	Background
T1_AATCGGTCACAGGCCT	0.423664	High-Risk
T1_ACACCAAAGAGACTTA	-0.415085	Background
T1_ACACCAACAATCCAAC	0.133062	Background
T1_ACACCAACATGGGAAC	0.35938	High-Risk
T1_ACACCAAGTGAAAGAG	-0.559474	Background
T1_ACACCCTCAGACGTAG	0.401016	High-Risk
T1_ACACCGGAGTGCCATT	0.186121	Background
T1_ACACCGGTCGCTTAGA	-0.333482	Background
T1_ACACTGAAGCATGGCA	-0.00493576	Background
T1_ACACTGAAGTGTCCCG	-0.145504	Background
T1_ACACTGAGTCCTGCTT	-0.509639	Background
T1_ACACTGAGTTCAGACT	-0.279173	Background
T1_ACACTGAGTTCGAATC	-0.337339	Background
T1_ACACTGATCACTTCAT	0.0310884	Background
T1_ACAGCCGCATCGACGC	-0.493316	Background
T1_ACAGCCGTCAAGCCTA	-0.441393	Background
T1_ACAGCTACATTGGTAC	0.02003	Background
T1_ACATACGAGACTCGGA	0.365123	High-Risk
T1_ACATACGCACGAAACG	-0.211722	Background
T1_ACATACGCAGGTCGTC	-0.00992349	Background
T1_ACATACGCATCAGTCA	0.266811	High-Risk
T1_ACATACGTCAGCCTAA	0.177581	Background
T1_ACATCAGGTTAAGATG	0.153227	Background
T1_ACATGGTAGATGTCGG	0.13124	Background
T1_ACATGGTAGTAGTGCG	-0.510116	Background
T1_ACATGGTCAGAGTGTG	-0.0724338	Background
T1_ACATGGTTCTAACGGT	0.132449	Background
T1_ACATGGTTCTCGCATC	0.322548	High-Risk
T1_ACCAGTAAGGCTCATT	-0.184416	Background
T1_ACCAGTAGTGCACCAC	0.273924	High-Risk
T1_ACCAGTATCACATACG	0.125792	Background
T1_ACCAGTATCCTACAGA	0.0655774	Background
T1_ACCAGTATCTTGCAAG	0.111879	Background
T1_ACCCACTGTTATTCTC	-0.5308	Background
T1_ACCCACTTCTGCAGTA	0.0429325	Background
T1_ACCGTAATCATGGTCA	0.112746	Background
T1_ACCTTTAGTTCACCTC	-0.032485	Background
T1_ACCTTTATCAGTTTGG	-0.494992	Background
T1_ACGAGCCGTCCAACTA	0.207281	Background
T1_ACGAGGAAGCCACGTC	0.284073	High-Risk
T1_ACGAGGACACCCTATC	-0.166936	Background
T1_ACGAGGAGTATATCCG	0.393724	High-Risk
T1_ACGAGGATCAGCTGGC	0.142892	Background
T1_ACGAGGATCGGAGCAA	-0.301648	Background
T1_ACGATACAGTACGTAA	-0.425624	Background
T1_ACGATGTAGGCTATCT	0.0584687	Background
T1_ACGATGTGTACCGTTA	0.137555	Background
T1_ACGATGTTCACGAAGG	0.102749	Background
T1_ACGCAGCGTCTGATTG	0.154025	Background
T1_ACGCAGCTCAGTTGAC	0.100426	Background
T1_ACGCCAGGTAGAGTGC	-0.236413	Background
T1_ACGCCAGGTCCGAGTC	0.0186037	Background
T1_ACGCCAGTCTTAGCCC	-0.266192	Background
T1_ACGCCGAGTACATGTC	0.081744	Background
T1_ACGCCGAGTGCACCAC	0.228836	High-Risk
T1_ACGCCGATCGGATGTT	0.102653	Background
T1_ACGGAGAAGCGATAGC	-0.290403	Background
T1_ACGGCCACAGTTAACC	0.331251	High-Risk
T1_ACGGCCAGTAAAGTCA	0.142471	Background
T1_ACGGCCAGTCCTGCTT	-0.191739	Background
T1_ACGGCCATCAGCTGGC	-0.476638	Background
T1_ACGGGCTAGACAGACC	0.164071	Background
T1_ACGGGCTCACTGTCGG	0.305723	High-Risk
T1_ACGGGCTCATCCGTGG	-0.394925	Background
T1_ACGGGTCCATGCGCAC	-0.164616	Background
T1_ACGGGTCTCGTTACGA	0.116895	Background
T1_ACGTCAACAGGAATCG	-0.46059	Background
T1_ACGTCAATCAACCAAC	0.166206	Background
T1_ACTATCTAGAACAATC	-0.0927428	Background
T1_ACTATCTAGTGTTTGC	-0.0805262	Background
T1_ACTATCTGTCTTTCAT	0.0937496	Background
T1_ACTATCTTCTCTGAGA	0.20241	Background
T1_ACTATCTTCTTATCTG	-0.551172	Background
T1_ACTGAACTCAAAGTAG	-0.104537	Background
T1_ACTGAACTCCCAACGG	-0.44307	Background
T1_ACTGAGTAGTTCGATC	-0.510032	Background
T1_ACTGATGGTATTCTCT	0.0534713	Background
T1_ACTGCTCAGCGATCCC	-0.173536	Background
T1_ACTGCTCGTATAGGGC	-0.0374786	Background
T1_ACTGCTCGTCTGATCA	0.10167	Background
T1_ACTGTCCAGCGATGAC	-0.46374	Background
T1_ACTGTCCGTCAAACTC	-0.482944	Background
T1_ACTGTCCTCAAACAAG	-0.147937	Background
T1_ACTTACTAGAAGAAGC	0.364612	High-Risk
T1_ACTTACTAGATCGGGT	0.35405	High-Risk
T1_ACTTGTTGTCAAAGCG	-0.546619	Background
T1_ACTTGTTTCTTTACGT	0.205081	Background
T1_AGAATAGAGAGCTGCA	-0.506323	Background
T1_AGAATAGGTCCTGCTT	0.0341862	Background
T1_AGAATAGGTGTGGTTT	0.130345	Background
T1_AGACGTTAGGCGACAT	0.0540174	Background
T1_AGAGCGAAGCGTCAAG	0.143197	Background
T1_AGAGCGACAAACCCAT	0.139814	Background
T1_AGAGCGAGTTCACGGC	0.138841	Background
T1_AGAGTGGCAATCACAC	-0.0470086	Background
T1_AGAGTGGCATCACGTA	-0.129977	Background
T1_AGAGTGGGTAAACGCG	-0.206012	Background
T1_AGATCTGCACGAAAGC	-0.399801	Background
T1_AGATCTGGTACGACCC	-0.399279	Background
T1_AGATCTGGTCCCTACT	0.156853	Background
T1_AGATTGCCATATACCG	0.133079	Background
T1_AGATTGCGTAGCTGCC	0.175117	Background
T1_AGCAGCCCAAGCCGCT	-0.525237	Background
T1_AGCAGCCCACGGACAA	0.0460728	Background
T1_AGCATACCAATGCCAT	-0.183548	Background
T1_AGCATACGTAACGACG	-0.499872	Background
T1_AGCATACTCCTGCTTG	-0.519826	Background
T1_AGCGGTCAGCTTATCG	0.132812	Background
T1_AGCGGTCCACCAGCAC	-0.0264876	Background
T1_AGCGGTCTCCGAAGAG	0.151762	Background
T1_AGCGTATGTATAGTAG	0.0792056	Background
T1_AGCGTCGTCACTCTTA	-0.502607	Background
T1_AGCTCCTCACAGGCCT	0.192093	Background
T1_AGCTCCTCACCATCCT	-0.417094	Background
T1_AGCTCCTCACTAAGTC	0.118345	Background
T1_AGCTCTCCACCATCCT	0.132829	Background
T1_AGCTCTCTCGGAGGTA	0.238093	High-Risk
T1_AGCTTGAAGCCCTAAT	-0.527695	Background
T1_AGCTTGACACGGACAA	-0.597744	Background
T1_AGCTTGACAGACGCTC	0.200642	Background
T1_AGCTTGACAGTTCCCT	-0.483057	Background
T1_AGCTTGATCAATCACG	-0.046719	Background
T1_AGGCCACAGTCCCACG	-0.289616	Background
T1_AGGCCACTCCTTTCTC	0.0779938	Background
T1_AGGCCACTCGGCATCG	0.0863786	Background
T1_AGGGAGTCAAGAGGCT	0.196555	Background
T1_AGGGAGTGTCATATCG	-0.421705	Background
T1_AGGGAGTTCTCCAGGG	0.226767	High-Risk
T1_AGGGATGAGCTGCCCA	-0.512038	Background
T1_AGGGATGGTAGAAAGG	0.109867	Background
T1_AGGGATGTCTCTTATG	0.24453	High-Risk
T1_AGGTCATAGTCCAGGA	0.0895971	Background
T1_AGGTCATCAGGGATTG	0.259274	High-Risk
T1_AGGTCATCAGGTTTCA	0.0113309	Background
T1_AGGTCATCATCCGGGT	0.173191	Background
T1_AGGTCATTCCAGGGCT	0.0369205	Background
T1_AGGTCATTCTTGTATC	0.399016	High-Risk
T1_AGGTCCGAGATGCCAG	0.0715592	Background
T1_AGGTCCGTCTCCAACC	-0.502448	Background
T1_AGTAGTCCAGTAAGCG	-0.427312	Background
T1_AGTAGTCTCAGTACGT	-0.445256	Background
T1_AGTCTTTAGCCAGTAG	-0.461261	Background
T1_AGTCTTTAGGGAACGG	-0.0918052	Background
T1_AGTCTTTCATTACGAC	0.0972101	Background
T1_AGTCTTTGTGACAAAT	0.022021	Background
T1_AGTGAGGAGACAGGCT	0.150908	Background
T1_AGTGAGGGTAAGTGTA	-0.513142	Background
T1_AGTGAGGTCCAAACAC	0.162729	Background
T1_AGTGGGACACAGCCCA	0.112755	Background
T1_AGTGGGACATCGATTG	0.0926827	Background
T1_AGTGGGAGTTACGACT	0.130697	Background
T1_AGTGGGATCGCCGTGA	0.0821697	Background
T1_AGTGTCAAGCGACGTA	0.0658847	Background
T1_AGTGTCACATTAACCG	0.422494	High-Risk
T1_AGTGTCAGTACCAGTT	0.0892297	Background
T1_AGTGTCAGTAGCTCCG	0.375464	High-Risk
T1_AGTGTCAGTCAATGTC	0.11978	Background
T1_AGTTGGTGTCTCTCTG	0.0969981	Background
T1_AGTTGGTTCAGCAACT	-0.360343	Background
T1_AGTTGGTTCCTCAATT	-0.30245	Background
T1_ATAACGCCACTCAGGC	0.138363	Background
T1_ATAACGCCAGACTCGC	0.132727	Background
T1_ATAACGCGTCAGAGGT	-0.475375	Background
T1_ATAACGCGTGTGAATA	0.424364	High-Risk
T1_ATAAGAGAGCTGCAAG	0.275349	High-Risk
T1_ATAAGAGTCGGTCCGA	0.128574	Background
T1_ATAGACCAGGATGGTC	-0.407347	Background
T1_ATAGACCGTACGAAAT	0.303394	High-Risk
T1_ATAGACCTCCTTGCCA	-0.51804	Background
T1_ATCACGACAGTCAGCC	0.208411	Background
T1_ATCACGAGTATGAAAC	0.11431	Background
T1_ATCATCTAGATATGCA	0.200441	Background
T1_ATCATCTAGCCACTAT	0.102081	Background
T1_ATCATCTGTAGCGTCC	0.0363182	Background
T1_ATCATCTTCTCTTGAT	0.202965	Background
T1_ATCATGGTCAGAAATG	0.24924	High-Risk
T1_ATCCACCCAGGCAGTA	0.1164	Background
T1_ATCCGAAAGCTCCTTC	0.42018	High-Risk
T1_ATCCGAAAGGCAGGTT	-0.415433	Background
T1_ATCCGAACACGTCTCT	0.393387	High-Risk
T1_ATCGAGTCACAGCCCA	0.123508	Background
T1_ATCGAGTGTAGAGTGC	0.189265	Background
T1_ATCGAGTGTATCTGCA	0.129845	Background
T1_ATCGAGTGTGGGTCAA	-0.307745	Background
T1_ATCTACTAGCTGCGAA	0.12845	Background
T1_ATCTACTTCACCAGGC	0.0866578	Background
T1_ATCTACTTCGTTGACA	0.173362	Background
T1_ATCTGCCAGCAGCGTA	0.134371	Background
T1_ATCTGCCTCCTTTACA	-0.50668	Background
T1_ATGCGATGTAAGTGTA	0.217976	Background
T1_ATGGGAGCAGATCCAT	-0.310498	Background
T1_ATGTGTGTCTTCATGT	0.353398	High-Risk
T1_ATTACTCAGAAGCCCA	0.136468	Background
T1_ATTACTCAGGACGAAA	0.287393	High-Risk
T1_ATTACTCAGTCATCCA	0.0318177	Background
T1_ATTACTCCATGCATGT	-0.245151	Background
T1_ATTACTCGTGCCTGCA	0.164112	Background
T1_ATTACTCTCTTAGCCC	-0.442775	Background
T1_ATTATCCCATTTCACT	0.0508417	Background
T1_ATTATCCGTAAAGGAG	-0.297086	Background
T1_ATTATCCGTACCTACA	0.0336387	Background
T1_ATTATCCGTCTGGTCG	-0.49573	Background
T1_ATTATCCTCGTCTGCT	0.423217	High-Risk
T1_ATTCTACAGCAATATG	-0.319101	Background
T1_ATTCTACCAAGTTCTG	-0.18747	Background
T1_ATTCTACCAATGTAAG	-0.365312	Background
T1_ATTCTACTCCTCATTA	0.141125	Background
T1_ATTGGACAGTTTGCGT	0.129455	Background
T1_ATTGGACTCCTAGGGC	0.0858869	Background
T1_ATTGGTGAGTCGATAA	-0.424914	Background
T1_ATTTCTGCATCCTTGC	0.105461	Background
T1_CAACCAAAGAGGTTAT	0.130699	Background
T1_CAACCAAAGTGTGGCA	0.127514	Background
T1_CAACCAACAATGTTGC	-0.403603	Background
T1_CAACCAACAGGGTTAG	-0.200143	Background
T1_CAACCAACATGGATGG	-0.0919139	Background
T1_CAACCAATCTCTTATG	0.0851718	Background
T1_CAACCTCAGGATTCGG	0.0595681	Background
T1_CAACCTCCAAGTAGTA	-0.510068	Background
T1_CAACCTCCATACTACG	-0.0503195	Background
T1_CAACCTCTCAAGATCC	0.245818	High-Risk
T1_CAAGAAAAGGGAGTAA	-0.459434	Background
T1_CAAGATCAGCCACGCT	-0.407693	Background
T1_CAAGATCCATGATCCA	-0.423822	Background
T1_CAAGGCCAGCTAGCCC	-0.116118	Background
T1_CAAGGCCCATTACCTT	-0.421524	Background
T1_CAAGGCCGTATTCTCT	-0.213813	Background
T1_CAAGGCCTCTAACCGA	0.161063	Background
T1_CAAGTTGAGAGCTTCT	-0.255522	Background
T1_CAAGTTGAGTAGCCGA	0.217687	Background
T1_CAAGTTGCAATAAGCA	-0.490422	Background
T1_CAAGTTGTCAGCGATT	-0.238817	Background
T1_CACAAACAGTGATCGG	0.0940646	Background
T1_CACAAACGTTGCGCAC	0.374072	High-Risk
T1_CACAAACTCACGCGGT	0.187052	Background
T1_CACAAACTCTGTTGAG	-0.0237685	Background
T1_CACACCTGTCAAACTC	-0.35107	Background
T1_CACACCTTCAGCTTAG	-0.365981	Background
T1_CACACTCAGGCACATG	0.416827	High-Risk
T1_CACAGGCAGAGAACAG	-0.379598	Background
T1_CACAGGCAGCCTATGT	-0.364254	Background
T1_CACAGGCCACCGTTGG	-0.498816	Background
T1_CACAGGCCAGCTGTGC	-0.373407	Background
T1_CACAGGCGTTAGTGGG	0.16072	Background
T1_CACAGGCTCGACGGAA	0.223605	High-Risk
T1_CACAGGCTCTTCTGGC	0.150457	Background
T1_CACAGTACAGCATGAG	0.164976	Background
T1_CACAGTAGTGGCAAAC	-0.398853	Background
T1_CACAGTATCAACGCTA	0.373579	High-Risk
T1_CACAGTATCCGGCACA	-0.0687315	Background
T1_CACATAGAGGCAGTCA	-0.397613	Background
T1_CACATAGAGTACATGA	-0.273439	Background
T1_CACATAGCATTGGGCC	0.02338	Background
T1_CACATAGGTTGTGGCC	-0.32781	Background
T1_CACATAGTCAGGCCCA	0.0964569	Background
T1_CACATTTAGCAGGCTA	0.135791	Background
T1_CACATTTAGCCACTAT	-0.171236	Background
T1_CACATTTGTAGCGCAA	-0.4783	Background
T1_CACCACTGTTGGAGGT	-0.316042	Background
T1_CACCACTTCCGTCAAA	-0.468333	Background
T1_CACCAGGAGTTGTCGT	-0.490995	Background
T1_CACCAGGCACGCTTTC	0.156913	Background
T1_CACCAGGTCCGTTGTC	0.339434	High-Risk
T1_CACCTTGAGAGTACAT	-0.488631	Background
T1_CACCTTGAGTAAGTAC	0.114977	Background
T1_CACCTTGCACGAGAGT	0.102646	Background
T1_CACCTTGGTTAGAACA	0.110489	Background
T1_CACTCCAAGCTCTCGG	0.380552	High-Risk
T1_CACTCCACAGATGGGT	-0.183698	Background
T1_CACTCCAGTGAGGCTA	0.216912	Background
T1_CAGAATCAGGTGTTAA	0.316915	High-Risk
T1_CAGAATCAGTTAGCGG	-0.512654	Background
T1_CAGAATCCACGGCGTT	-0.368644	Background
T1_CAGATCAAGGCGCTCT	0.419899	High-Risk
T1_CAGATCACAGCCTATA	-0.18007	Background
T1_CAGATCATCGTCCAGG	-0.324001	Background
T1_CAGCAGCGTGGCTCCA	-0.127237	Background
T1_CAGCATAAGCGAGAAA	0.304436	High-Risk
T1_CAGCATAAGTACCGGA	0.221793	High-Risk
T1_CAGCATACAGTTAACC	-0.470129	Background
T1_CAGCCGAAGCGGCTTC	0.145541	Background
T1_CAGCCGATCAACACAC	-0.0237669	Background
T1_CAGCCGATCTTGTTTG	-0.481331	Background
T1_CAGCGACAGATGCCAG	0.084107	Background
T1_CAGCGACGTACTCGCG	-0.499859	Background
T1_CAGCGACTCAATCTCT	0.0580131	Background
T1_CAGCTAACAAGCCATT	0.10952	Background
T1_CAGCTAACACTTAACG	0.26896	High-Risk
T1_CAGCTAACAGACGCTC	0.17252	Background
T1_CAGCTAAGTCTGCGGT	0.433576	High-Risk
T1_CAGCTAAGTGTGGTTT	0.0799383	Background
T1_CAGCTAATCGTTTGCC	-0.159845	Background
T1_CAGCTAATCTCGTATT	0.178901	Background
T1_CAGCTAATCTGGAGCC	0.256494	High-Risk
T1_CAGCTGGCACAGCCCA	-0.546242	Background
T1_CAGCTGGTCATAAAGG	-0.429273	Background
T1_CAGCTGGTCTCATTCA	0.160799	Background
T1_CAGGTGCCATGGGAAC	0.0928669	Background
T1_CAGGTGCGTTGCGCAC	0.159508	Background
T1_CAGGTGCTCTCTTATG	-0.346324	Background
T1_CAGTAACCACATCTTT	0.0141624	Background
T1_CAGTCCTTCGCGGATC	0.401594	High-Risk
T1_CATATGGAGGTTACCT	-0.47251	Background
T1_CATATGGTCAGTTAGC	0.42245	High-Risk
T1_CATCAAGAGCTGATAA	0.0701848	Background
T1_CATCAAGAGTGTGGCA	0.207987	Background
T1_CATCAAGGTACGCTGC	-0.410465	Background
T1_CATCAAGGTCCGTGAC	0.0839315	Background
T1_CATCAAGTCCCTTGCA	0.165711	Background
T1_CATCGAACACAACTGT	-0.243586	Background
T1_CATCGAAGTTGAGTTC	0.298382	High-Risk
T1_CATCGAATCATAAAGG	-0.183058	Background
T1_CATCGGGTCAACACGT	0.106136	Background
T1_CATCGGGTCAGCTTAG	-0.528896	Background
T1_CATCGGGTCTGCGACG	0.1625	Background
T1_CATGCCTAGATATACG	-0.0674585	Background
T1_CATGCCTAGCTCCTTC	-0.261347	Background
T1_CATGCCTCACAACTGT	0.276995	High-Risk
T1_CATGCCTCACCACGTG	0.0833284	Background
T1_CATGCCTCATTATCTC	0.248611	High-Risk
T1_CATGCCTGTTCGTGAT	-0.471955	Background
T1_CATGGCGCAGGATTGG	-0.476999	Background
T1_CATGGCGCATGGGAAC	-0.679391	Background
T1_CATGGCGGTGCCTGCA	0.17355	Background
T1_CATGGCGTCGCTTGTC	0.239055	High-Risk
T1_CATTATCAGGCTAGGT	-0.477004	Background
T1_CATTATCAGGCTCAGA	0.188548	Background
T1_CATTATCCAGGTTTCA	-0.237734	Background
T1_CATTATCGTCTAGCGC	0.133836	Background
T1_CATTCGCAGCCAGGAT	0.161756	Background
T1_CATTCGCCACGTAAGG	0.0748213	Background
T1_CCAATCCGTGCCTTGG	-0.428345	Background
T1_CCAATCCTCAGAGGTG	0.103751	Background
T1_CCACCTAAGTGTGGCA	-0.32552	Background
T1_CCACGGATCATGCAAC	0.241045	High-Risk
T1_CCAGCGAGTTGTGGAG	0.382705	High-Risk
T1_CCAGCGATCAAAGTAG	-0.0403378	Background
T1_CCATGTCCACCAGGCT	-0.209262	Background
T1_CCATGTCTCCAATGGT	0.115889	Background
T1_CCATTCGCAGATAATG	0.429573	High-Risk
T1_CCATTCGGTTACGTCA	0.165376	Background
T1_CCCAATCAGCACCGCT	0.337329	High-Risk
T1_CCCAATCGTGGAAAGA	-0.478237	Background
T1_CCCAATCTCCTTAATC	-0.502602	Background
T1_CCCAGTTTCTCTAGGA	0.00192009	Background
T1_CCCATACCACGAAACG	0.0444509	Background
T1_CCCATACCAGTGGGAT	0.284015	High-Risk
T1_CCCATACGTTGGTTTG	0.139576	Background
T1_CCGGTAGAGTTAGGTA	-0.467533	Background
T1_CCGTACTCAACAACCT	0.143847	Background
T1_CCGTACTCACACGCTG	0.145868	Background
T1_CCGTACTCAGTGACAG	0.08889	Background
T1_CCGTACTGTAGAAAGG	-0.419307	Background
T1_CCGTACTGTAGCTTGT	0.124253	Background
T1_CCGTGGACAAGCGATG	-0.488974	Background
T1_CCGTGGACAGCGTCCA	0.437417	High-Risk
T1_CCGTGGAGTCTAACGT	-0.20793	Background
T1_CCGTGGATCCTAGTGA	0.238518	High-Risk
T1_CCGTGGATCTTCATGT	-0.126821	Background
T1_CCGTTCACATGTAGTC	0.389811	High-Risk
T1_CCGTTCAGTAGCCTAT	0.025723	Background
T1_CCGTTCATCGTGGACC	0.103449	Background
T1_CCTAAAGAGCTCCTTC	0.401014	High-Risk
T1_CCTAAAGCACGGTAAG	0.364843	High-Risk
T1_CCTAAAGTCAAGATCC	0.157913	Background
T1_CCTAAAGTCGCCAGCA	0.0949059	Background
T1_CCTACACAGAACAATC	-0.150625	Background
T1_CCTACACGTCTAAACC	0.0932575	Background
T1_CCTACCAAGTGCTGCC	-0.216066	Background
T1_CCTAGCTGTCATCGGC	0.250197	High-Risk
T1_CCTATTAAGGTTACCT	-0.248897	Background
T1_CCTATTAAGTTACGGG	-0.204497	Background
T1_CCTATTAGTGATGATA	0.27807	High-Risk
T1_CCTATTATCAGGCCCA	-0.158528	Background
T1_CCTCAGTAGTGGGATC	0.122958	Background
T1_CCTCAGTCAGTAGAGC	0.213001	Background
T1_CCTCAGTGTATGAAAC	-0.330514	Background
T1_CCTCTGAAGATCCCAT	-0.478821	Background
T1_CCTCTGAGTGATAAGT	-0.390853	Background
T1_CCTCTGAGTTTGGGCC	0.0768279	Background
T1_CCTTACGAGCGCTCCA	0.0371122	Background
T1_CCTTACGGTGTTGGGA	0.00316084	Background
T1_CCTTACGTCAAGCCTA	-0.118676	Background
T1_CCTTCCCCAGGAACGT	-0.444551	Background
T1_CCTTCCCGTGTGGCTC	0.150195	Background
T1_CCTTCCCTCACATACG	0.142476	Background
T1_CCTTCCCTCACGATGT	0.10104	Background
T1_CCTTCCCTCAGCCTAA	0.205309	Background
T1_CCTTCCCTCCAAACAC	-0.322272	Background
T1_CCTTCGAAGAAACGAG	-0.411844	Background
T1_CCTTCGATCATCTGCC	0.349452	High-Risk
T1_CCTTCGATCCGCAAGC	0.0838254	Background
T1_CCTTTCTCATTCTCAT	0.197134	Background
T1_CGAACATAGATGCCAG	-0.43617	Background
T1_CGAACATAGCGCCTTG	0.0968645	Background
T1_CGAACATAGCTACCTA	0.32885	High-Risk
T1_CGAATGTGTTGTGGAG	-0.297019	Background
T1_CGACCTTCACAGGCCT	0.0187513	Background
T1_CGACCTTGTTATCCGA	0.141396	Background
T1_CGACCTTGTTGGTAAA	-0.520994	Background
T1_CGACTTCAGATCCCGC	0.0123722	Background
T1_CGAGAAGTCGCATGGC	-0.509965	Background
T1_CGAGAAGTCGTACCGG	-0.496255	Background
T1_CGAGCACTCCGGCACA	-0.00897393	Background
T1_CGAGCCAAGCCCAACC	0.153659	Background
T1_CGAGCCATCCCAACGG	-0.489178	Background
T1_CGATCGGCATTCTTAC	-0.451391	Background
T1_CGATCGGGTCGGCATC	0.191971	Background
T1_CGATGGCTCCATGAAC	0.154774	Background
T1_CGATGTAAGACGCACA	0.217403	Background
T1_CGATTGAAGGCTAGGT	0.140603	Background
T1_CGATTGAGTCGCTTTC	-0.327056	Background
T1_CGATTGATCACCACCT	0.363447	High-Risk
T1_CGCGGTAAGGCTACGA	0.435358	High-Risk
T1_CGCGGTACAGGTGGAT	0.361068	High-Risk
T1_CGCGGTAGTACAGCAG	0.282176	High-Risk
T1_CGCGTTTGTACAGTGG	-0.583107	Background
T1_CGCTATCAGGGAACGG	0.421353	High-Risk
T1_CGCTATCGTAAGGATT	0.259898	High-Risk
T1_CGCTTCATCCCTAACC	0.123436	Background
T1_CGGACACAGCGATCCC	-0.359535	Background
T1_CGGACGTCAGTAACGG	0.142406	Background
T1_CGGACGTTCTGCTGTC	-0.015072	Background
T1_CGGACTGAGTTGAGTA	0.127425	Background
T1_CGGACTGTCATGCTCC	0.195916	Background
T1_CGGACTGTCTTAACCT	-0.388809	Background
T1_CGGAGTCGTAGCTAAA	0.424578	High-Risk
T1_CGGCTAGCAAGGACAC	0.396795	High-Risk
T1_CGGCTAGCACAAGCCC	-0.329924	Background
T1_CGGCTAGTCCAAGTAC	-0.143645	Background
T1_CGGCTAGTCCGCAAGC	0.217495	Background
T1_CGGGTCATCCCAAGTA	-0.441314	Background
T1_CGGGTCATCGCTTAGA	0.338676	High-Risk
T1_CGGTTAAAGTGTTGAA	-0.310649	Background
T1_CGGTTAACAGACGCCT	-0.0343203	Background
T1_CGGTTAACATCGGGTC	-0.299135	Background
T1_CGGTTAAGTTGAGGTG	0.287925	High-Risk
T1_CGGTTAAGTTTGGCGC	0.140812	Background
T1_CGTAGCGGTCTAGCGC	-0.489491	Background
T1_CGTAGCGTCAGGCGAA	-0.473462	Background
T1_CGTAGGCTCCTCTAGC	-0.303678	Background
T1_CGTAGGCTCGATCCCT	0.0607642	Background
T1_CGTAGGCTCGCCAAAT	0.234878	High-Risk
T1_CGTCACTCAAAGCGGT	0.117391	Background
T1_CGTCACTTCACCAGGC	0.0817175	Background
T1_CGTCCATCAATAGCAA	-0.0770752	Background
T1_CGTCCATGTAAACGCG	-0.19511	Background
T1_CGTCCATGTCATGCCG	0.410752	High-Risk
T1_CGTCCATTCCTGCAGG	-0.461309	Background
T1_CGTCTACAGGATATAC	0.114066	Background
T1_CGTGAGCTCACTATTC	-0.242764	Background
T1_CGTGTAACATGCAACT	-0.379051	Background
T1_CGTGTAAGTAGCTCCG	0.291177	High-Risk
T1_CGTGTAATCACATACG	0.354025	High-Risk
T1_CGTGTAATCTCGCTTG	0.417714	High-Risk
T1_CGTGTCTGTGCGGTAA	0.101571	Background
T1_CGTGTCTTCATTGCGA	-0.42868	Background
T1_CGTGTCTTCCCTTGCA	-0.428143	Background
T1_CGTGTCTTCGTGACAT	0.250199	High-Risk
T1_CGTTAGATCCTATTCA	-0.485783	Background
T1_CGTTCTGAGGAATTAC	0.170592	Background
T1_CGTTCTGAGGACCACA	0.402878	High-Risk
T1_CGTTCTGTCCGCATAA	0.336292	High-Risk
T1_CGTTGGGAGTGCGTGA	-0.322453	Background
T1_CGTTGGGCACATGGGA	0.235278	High-Risk
T1_CTAACTTAGCACGCCT	0.504002	High-Risk
T1_CTAACTTAGGGCACTA	-0.342224	Background
T1_CTAACTTGTCACCCAG	-0.423325	Background
T1_CTAACTTGTTAAAGTG	-0.503466	Background
T1_CTAACTTTCCGGCACA	0.0960084	Background
T1_CTAACTTTCTTGGGTA	0.130589	Background
T1_CTAAGACTCAAACGGG	-0.0191454	Background
T1_CTAATGGCACAGATTC	-0.51299	Background
T1_CTACACCCATAGACTC	-0.354763	Background
T1_CTACACCGTTCGTTGA	-0.210731	Background
T1_CTACACCTCGCTTAGA	0.0907281	Background
T1_CTACATTTCATACGGT	-0.538086	Background
T1_CTACATTTCCCATTTA	-0.417865	Background
T1_CTACCCAAGCAGGCTA	-0.118706	Background
T1_CTACCCACATGGTCTA	-0.00838771	Background
T1_CTACCCACATTCCTCG	0.0213435	Background
T1_CTACCCATCCTTTCTC	-0.496865	Background
T1_CTACCCATCTGCTGTC	0.150781	Background
T1_CTACGTCAGACTAGAT	-0.236211	Background
T1_CTACGTCAGCGCCTCA	0.145602	Background
T1_CTACGTCCATGACGGA	0.0903701	Background
T1_CTACGTCTCACTTACT	0.109103	Background
T1_CTAGCCTAGCGTTTAC	-0.395531	Background
T1_CTAGCCTGTTCCATGA	0.267187	High-Risk
T1_CTAGCCTTCAACGGCC	0.131444	Background
T1_CTAGTGAAGCCACGCT	0.302876	High-Risk
T1_CTAGTGACAATCTACG	0.162945	Background
T1_CTAGTGACATAGGATA	0.192533	Background
T1_CTAGTGATCATCACCC	0.101242	Background
T1_CTCACACAGGGTATCG	0.14279	Background
T1_CTCACACCAAACTGTC	0.0931084	Background
T1_CTCACACTCAACACGT	0.144346	Background
T1_CTCACACTCATTGCCC	0.100494	Background
T1_CTCAGAAAGAAGAAGC	0.119355	Background
T1_CTCAGAAAGTGGGATC	0.133804	Background
T1_CTCAGAATCAGAGACG	-0.201942	Background
T1_CTCATTAAGCGTCAAG	-0.465255	Background
T1_CTCATTACACGTCAGC	0.0686059	Background
T1_CTCATTAGTCTAAACC	0.200939	Background
T1_CTCATTATCAGTTTGG	0.125921	Background
T1_CTCCTAGCATGCCTTC	0.221654	High-Risk
T1_CTCCTAGTCTTAGCCC	0.12703	Background
T1_CTCGAAAAGAAACCTA	-0.460771	Background
T1_CTCGAAAAGTCAATAG	-0.206397	Background
T1_CTCGAAATCACCATAG	0.187793	Background
T1_CTCGAGGAGAGTTGGC	-0.272332	Background
T1_CTCGAGGAGCGTTCCG	-0.0859763	Background
T1_CTCGAGGAGCTGCAAG	0.0906442	Background
T1_CTCGAGGGTTATTCTC	0.317097	High-Risk
T1_CTCGGAGAGCGACGTA	0.121833	Background
T1_CTCGGAGAGCTAAGAT	0.320411	High-Risk
T1_CTCGGAGGTAGCCTAT	0.0670949	Background
T1_CTCGGGACATGGTCAT	-0.271769	Background
T1_CTCGTACAGTTAACGA	0.0962041	Background
T1_CTCGTACCAACACGCC	-0.507284	Background
T1_CTCGTACGTAATAGCA	0.0545308	Background
T1_CTCGTACGTCAACATC	0.325822	High-Risk
T1_CTCGTCATCAACTCTT	0.198604	Background
T1_CTCGTCATCACGACTA	-0.314003	Background
T1_CTCTAATCAAATACAG	0.191075	Background
T1_CTCTAATCATGGTTGT	0.211212	Background
T1_CTCTAATGTCTGGAGA	0.357954	High-Risk
T1_CTCTACGCAATCCAAC	0.422944	High-Risk
T1_CTCTGGTCATTATCTC	-0.0581179	Background
T1_CTCTGGTTCTCGGACG	0.153202	Background
T1_CTGAAACAGACTGGGT	0.237812	High-Risk
T1_CTGAAACCACCCTATC	-0.354831	Background
T1_CTGAAGTCACACGCTG	0.0486517	Background
T1_CTGAAGTCATTGGGCC	0.427006	High-Risk
T1_CTGATAGAGTCGAGTG	-0.443634	Background
T1_CTGATAGGTTGTGGCC	-0.50518	Background
T1_CTGATAGTCAGATAAG	0.0854236	Background
T1_CTGATCCAGTACGACG	0.26828	High-Risk
T1_CTGATCCCATCGATGT	0.157148	Background
T1_CTGATCCGTCTAACGT	0.088537	Background
T1_CTGCCTAAGTAGCCGA	-0.532314	Background
T1_CTGCCTAGTTTGACTG	-0.453849	Background
T1_CTGCGGATCTCTGCTG	-0.455632	Background
T1_CTGCTGTAGTTAACGA	0.424654	High-Risk
T1_CTGCTGTCACCGCTAG	0.0816268	Background
T1_CTGCTGTGTACTCGCG	0.218274	Background
T1_CTGCTGTTCACCATAG	0.158195	Background
T1_CTGCTGTTCGATGAGG	-0.276459	Background
T1_CTGGTCTCAAACGTGG	0.113648	Background
T1_CTGGTCTCACGTAAGG	-0.223286	Background
T1_CTGGTCTGTTGAGGTG	-0.226393	Background
T1_CTGGTCTTCTTCATGT	-0.524998	Background
T1_CTGTGCTCAAATCCGT	-0.07544	Background
T1_CTGTGCTCACGAAACG	-0.527621	Background
T1_CTGTGCTCATGTCTCC	0.0846704	Background
T1_CTGTGCTGTGTAAGTA	-0.545952	Background
T1_CTGTTTAAGGGTTCCC	-0.262797	Background
T1_CTTAACTGTCTCTCTG	-0.463699	Background
T1_CTTAACTTCAGTCCCT	0.269512	High-Risk
T1_CTTACCGAGAAACCTA	-0.55731	Background
T1_CTTACCGCAGTAAGAT	0.110862	Background
T1_CTTACCGCATCACCCT	0.0774444	Background
T1_CTTACCGTCGGTTCGG	0.127111	Background
T1_CTTACCGTCTGATACG	0.130179	Background
T1_CTTAGGAAGCTAGTCT	-0.534784	Background
T1_CTTAGGACAAATCCGT	0.25293	High-Risk
T1_CTTAGGACAGCCTGTG	-0.48974	Background
T1_CTTAGGACATCGGAAG	-0.526223	Background
T1_CTTAGGATCTTGCAAG	-0.269131	Background
T1_CTTCTCTCATATGCTG	0.0983416	Background
T1_CTTCTCTGTTATCACG	-0.0250124	Background
T1_CTTGGCTAGAGAGCTC	-0.410901	Background
T1_CTTGGCTTCCCGGATG	0.0952306	Background
T1_CTTTGCGAGCCACCTG	0.130958	Background
T1_CTTTGCGCAAGGACAC	0.3072	High-Risk
T1_GAAACTCAGCTGAAAT	0.00550186	Background
T1_GAAACTCAGGCGTACA	-0.214681	Background
T1_GAAACTCAGTCAAGGC	-0.0818416	Background
T1_GAAACTCCACCGAAAG	0.126609	Background
T1_GAAACTCCAGCGTCCA	0.28329	High-Risk
T1_GAAACTCGTGTATGGG	-0.402783	Background
T1_GAAACTCTCCTCCTAG	0.0898206	Background
T1_GAAACTCTCTATCCCG	-0.255603	Background
T1_GAAACTCTCTTCGGTC	-0.0132357	Background
T1_GAACATCTCTTGTATC	0.389628	High-Risk
T1_GAACCTATCAAACCAC	0.134694	Background
T1_GAAGCAGGTACTTAGC	-0.302193	Background
T1_GAAGCAGGTTAAGGGC	0.466726	High-Risk
T1_GAATAAGCAGGCTCAC	0.105506	Background
T1_GAATAAGGTCGCTTCT	0.19761	Background
T1_GAATAAGTCTCTAAGG	-0.504401	Background
T1_GAATAAGTCTGCAGTA	-0.195274	Background
T1_GAATGAAGTTACGGAG	0.0564697	Background
T1_GACACGCAGGGAGTAA	-0.00201555	Background
T1_GACACGCCATCGGTTA	0.243311	High-Risk
T1_GACACGCGTACGAAAT	-0.474476	Background
T1_GACACGCTCTAACTCT	0.516043	High-Risk
T1_GACAGAGCAGTCAGAG	-0.270338	Background
T1_GACAGAGTCAAGCCTA	-0.107072	Background
T1_GACCAATCACGACTCG	0.100879	Background
T1_GACCAATCAGCTGGCT	0.0259414	Background
T1_GACCAATGTGCAACGA	0.125346	Background
T1_GACCTGGCACTTCTGC	0.404774	High-Risk
T1_GACCTGGCATGGTAGG	-0.110609	Background
T1_GACCTGGTCCGTAGTA	0.171237	Background
T1_GACGCGTAGTCCAGGA	0.163305	Background
T1_GACGCGTTCTTACCTA	0.0925199	Background
T1_GACGGCTCAGCCTTTC	0.168044	Background
T1_GACGTGCAGAGCTTCT	0.334792	High-Risk
T1_GACGTGCAGAGGGCTT	0.0154636	Background
T1_GACGTGCGTGCAGACA	-0.0618295	Background
T1_GACGTGCTCTAGAGTC	0.275668	High-Risk
T1_GACGTTAAGAGCCCAA	0.129024	Background
T1_GACGTTAAGTCGTACT	-0.492153	Background
T1_GACGTTACAACTGCTA	0.305379	High-Risk
T1_GACGTTATCGCGTTTC	-0.412678	Background
T1_GACTAACCAGATCTGT	0.0537144	Background
T1_GACTACAAGGCTAGAC	0.129192	Background
T1_GACTACACAGCTCCGA	-0.345252	Background
T1_GACTACAGTAGCTAAA	-0.201393	Background
T1_GACTGCGAGCCAGAAC	-0.464182	Background
T1_GACTGCGAGCCGTCGT	0.0789595	Background
T1_GACTGCGGTTCGAATC	0.119505	Background
T1_GACTGCGTCACTATTC	-0.209265	Background
T1_GACTGCGTCCGCGTTT	-0.515739	Background
T1_GACTGCGTCCTTGACC	-0.124002	Background
T1_GAGCAGAGTCTAGCGC	0.212171	Background
T1_GAGCAGATCGTCCAGG	0.192423	Background
T1_GAGCAGATCTCCCTGA	0.272013	High-Risk
T1_GAGCAGATCTTGTACT	0.130014	Background
T1_GAGGTGAGTAGCGCTC	0.125319	Background
T1_GAGGTGATCTCTTGAT	0.0806793	Background
T1_GAGTCCGTCAAAGTAG	0.0467718	Background
T1_GATCAGTAGTACATGA	0.0320888	Background
T1_GATCAGTGTATCTGCA	-0.382035	Background
T1_GATCGATCACCTATCC	0.156114	Background
T1_GATCGATTCTCAAACG	0.127377	Background
T1_GATCGCGAGCTTTGGT	-0.526621	Background
T1_GATCGCGGTCAGAGGT	0.0235493	Background
T1_GATCGCGGTCGCGAAA	-0.473836	Background
T1_GATCGTAGTGCAACTT	0.0860406	Background
T1_GATCTAGAGCTCCCAG	0.350008	High-Risk
T1_GATCTAGCATCCGGGT	0.144631	Background
T1_GATGAAACAGGCAGTA	-0.12227	Background
T1_GATGAAAGTATAATGG	-0.496765	Background
T1_GATGAAAGTGGTCTCG	0.258455	High-Risk
T1_GATGAGGCAAACAACA	0.175939	Background
T1_GATGAGGCACCATGTA	-0.594524	Background
T1_GATGCTAAGTACACCT	0.0144342	Background
T1_GATGCTACATGCCTAA	0.115133	Background
T1_GATGCTAGTCCAGTAT	0.281723	High-Risk
T1_GATGCTATCGGAGCAA	0.198049	Background
T1_GATTCAGCATGGTTGT	0.247553	High-Risk
T1_GATTCAGCATTCTCAT	-0.0343808	Background
T1_GATTCAGGTATTCGTG	0.0971033	Background
T1_GCAAACTAGCGTTCCG	-0.0325845	Background
T1_GCAATCAAGATCCTGT	-0.497295	Background
T1_GCAATCACACTCAGGC	-0.00184292	Background
T1_GCAATCATCAAGATCC	0.0867074	Background
T1_GCACATACAGTCGATT	0.0787764	Background
T1_GCACTCTAGCGTGAAC	-0.408922	Background
T1_GCACTCTCATGGGACA	0.205524	Background
T1_GCACTCTGTCATGCCG	-0.344627	Background
T1_GCACTCTGTGTGAAAT	-0.124687	Background
T1_GCACTCTTCCGTTGCT	-0.220118	Background
T1_GCACTCTTCGGCTTGG	0.0720376	Background
T1_GCACTCTTCGTTGCCT	0.0832596	Background
T1_GCACTCTTCTTCGGTC	-0.381893	Background
T1_GCAGTTAGTTAAGGGC	-0.072377	Background
T1_GCAGTTATCTCGGACG	-0.516746	Background
T1_GCATACAAGAAGGTTT	0.390839	High-Risk
T1_GCATACAAGCCACCTG	-0.303027	Background
T1_GCATACAAGGCTAGAC	0.133986	Background
T1_GCATACACACAGACAG	0.12624	Background
T1_GCATACATCAGTCCCT	0.359698	High-Risk
T1_GCATACATCGTGGTCG	0.196008	Background
T1_GCATGATAGTCGCCGT	0.0578067	Background
T1_GCATGATGTAAGCACG	0.1391	Background
T1_GCATGATGTGACGCCT	-0.505019	Background
T1_GCATGATTCCCGGATG	-0.0984666	Background
T1_GCATGCGAGAGTACCG	-0.502135	Background
T1_GCATGCGGTACCAGTT	-0.112494	Background
T1_GCATGTAAGCTAGTTC	-0.235113	Background
T1_GCCAAATGTCCGTGAC	-0.333505	Background
T1_GCCTCTATCGGACAAG	0.0391348	Background
T1_GCGACCAGTTAGATGA	-0.187338	Background
T1_GCGACCAGTTCACGGC	0.3581	High-Risk
T1_GCGAGAAAGGCAATTA	-0.178572	Background
T1_GCGAGAACATCAGTCA	-0.463391	Background
T1_GCGCAACTCCAATGGT	-0.0391333	Background
T1_GCGCAACTCTATCGCC	-0.346897	Background
T1_GCGCAGTAGAAACCAT	-0.293016	Background
T1_GCGCAGTAGCCCTAAT	0.259312	High-Risk
T1_GCGCAGTAGCTTATCG	0.248717	High-Risk
T1_GCGCAGTTCAACCATG	-0.357969	Background
T1_GCGCCAATCAGTTGAC	-0.477492	Background
T1_GCGCCAATCATGTCCC	0.243528	High-Risk
T1_GCGCCAATCCGCAGTG	0.280924	High-Risk
T1_GCGCGATAGTGCGTGA	0.153702	Background
T1_GCGCGATGTCTGCAAT	-0.485692	Background
T1_GCGCGATGTGTAATGA	-0.0452339	Background
T1_GCGGGTTAGACGCAAC	0.0739953	Background
T1_GCTCCTACAAAGTCAA	0.132999	Background
T1_GCTCCTACAAGAAGAG	0.0620958	Background
T1_GCTCCTACAAGGACTG	-0.477661	Background
T1_GCTCTGTAGGACTGGT	0.347679	High-Risk
T1_GCTGCAGCACAGCCCA	-0.0571234	Background
T1_GCTGCAGGTGTTGAGG	0.0702489	Background
T1_GCTGCGACACAGATTC	0.361713	High-Risk
T1_GCTGCGATCATAGCAC	0.361824	High-Risk
T1_GCTGCGATCTTTAGTC	0.0912609	Background
T1_GCTGCTTAGGTAAACT	0.288753	High-Risk
T1_GCTGCTTAGTTGTAGA	0.148472	Background
T1_GCTGCTTGTACTTGAC	0.107216	Background
T1_GCTGCTTGTCCGAATT	-0.172507	Background
T1_GCTGCTTGTGTTGGGA	-0.0289013	Background
T1_GCTGCTTTCTTCCTTC	-0.542433	Background
T1_GCTGGGTAGCGTGAAC	-0.476503	Background
T1_GCTGGGTAGTTAGGTA	0.105445	Background
T1_GCTGGGTGTTTAAGCC	0.307782	High-Risk
T1_GCTGGGTGTTTGACAC	0.331196	High-Risk
T1_GCTGGGTTCATTTGGG	0.0293096	Background
T1_GCTTCCAAGATGCCAG	-0.0573591	Background
T1_GCTTCCAGTAGCTTGT	0.119048	Background
T1_GCTTCCAGTCAAAGCG	0.155042	Background
T1_GCTTCCATCATGCATG	0.0716922	Background
T1_GCTTGAATCATAACCG	-0.00619883	Background
T1_GGAACTTGTCCAAGTT	0.131324	Background
T1_GGAACTTGTCTGCGGT	-0.534999	Background
T1_GGACAAGGTCTACCTC	-0.39181	Background
T1_GGACAAGGTTGCTCCT	0.264564	High-Risk
T1_GGACAAGGTTTCCACC	-0.270176	Background
T1_GGACAGATCTACCAGA	0.0154402	Background
T1_GGACATTTCAAACGGG	0.021454	Background
T1_GGACGTCCAATCGAAA	-0.526614	Background
T1_GGACGTCCAATGGTCT	0.108122	Background
T1_GGACGTCCAGTACACT	-0.103171	Background
T1_GGACGTCCAGTTTACG	-0.239412	Background
T1_GGACGTCTCCTAAGTG	0.395017	High-Risk
T1_GGACGTCTCTGCGGCA	-0.315669	Background
T1_GGAGCAACATAAGACA	0.104822	Background
T1_GGAGCAATCAACGAAA	-0.509468	Background
T1_GGAGCAATCTACTATC	0.297338	High-Risk
T1_GGAGCAATCTGACCTC	0.0773768	Background
T1_GGATGTTAGCTCAACT	-0.518756	Background
T1_GGATTACAGCCCGAAA	0.192145	Background
T1_GGATTACTCCTTTACA	-0.312027	Background
T1_GGCAATTCACTCAGGC	0.125348	Background
T1_GGCCGATAGTACGATA	0.115491	Background
T1_GGCGACTAGGAGTACC	0.211963	Background
T1_GGCGTGTTCGTATCAG	-0.258929	Background
T1_GGCTCGAGTAGCCTCG	0.0555687	Background
T1_GGCTGGTCAAAGTGCG	0.148991	Background
T1_GGCTGGTGTCTGCAAT	-0.518613	Background
T1_GGGAATGAGACAGAGA	-0.522705	Background
T1_GGGAATGAGTCGAGTG	0.409913	High-Risk
T1_GGGAATGCATTATCTC	0.156227	Background
T1_GGGAATGTCTTGGGTA	-0.300536	Background
T1_GGGACCTCACAAGCCC	-0.0681184	Background
T1_GGGACCTCACGAAAGC	-0.497579	Background
T1_GGGACCTCATTGAGCT	0.14667	Background
T1_GGGACCTGTCGCATAT	0.389712	High-Risk
T1_GGGAGATAGGCGCTCT	-0.1483	Background
T1_GGGCACTCATGGTTGT	0.072725	Background
T1_GGGCATCAGATCCCAT	0.13923	Background
T1_GGGCATCCAGGATTGG	-0.156559	Background
T1_GGGCATCTCACATACG	-0.553304	Background
T1_GGGTCTGCACGGACAA	-0.054752	Background
T1_GGGTCTGGTAACGACG	-0.191348	Background
T1_GGGTCTGGTAGATTAG	-0.540561	Background
T1_GGGTCTGTCTGGTGTA	-0.509558	Background
T1_GGTATTGAGGACAGAA	-0.500128	Background
T1_GGTATTGTCGAACGGA	-0.19485	Background
T1_GGTGAAGAGTGTACTC	0.242149	High-Risk
T1_GGTGAAGCATTCTCAT	0.166062	Background
T1_GGTGAAGGTTTGTGTG	-0.252363	Background
T1_GGTGTTACAGTTCCCT	0.103886	Background
T1_GGTGTTAGTTGGTGGA	-0.114659	Background
T1_GGTGTTATCGTTTATC	0.267007	High-Risk
T1_GTAACGTCACCGAATT	-0.00570489	Background
T1_GTAACTGCATGGAATA	-0.406825	Background
T1_GTAACTGGTAGCGTCC	0.0999712	Background
T1_GTAACTGTCCGCATCT	-0.554277	Background
T1_GTAACTGTCTGTCAAG	-0.256783	Background
T1_GTACGTAAGGGATGGG	0.321819	High-Risk
T1_GTACGTAAGTGGTAAT	0.159047	Background
T1_GTACGTAGTTGATTGC	-0.00330862	Background
T1_GTACGTATCGCTGATA	0.0912493	Background
T1_GTACTCCAGGCTCTTA	0.386486	High-Risk
T1_GTACTCCGTTCGTTGA	0.0645972	Background
T1_GTACTTTAGACGCACA	-0.0296485	Background
T1_GTACTTTGTCTCTCGT	0.373607	High-Risk
T1_GTACTTTTCTGAGGGA	-0.353834	Background
T1_GTAGTCAGTAATCACC	-0.209819	Background
T1_GTATCTTAGACTGTAA	-0.499795	Background
T1_GTATCTTGTACCGCTG	0.136261	Background
T1_GTATCTTGTGTTGGGA	0.120644	Background
T1_GTATCTTTCACCGTAA	0.171547	Background
T1_GTATTCTCATTAACCG	0.25614	High-Risk
T1_GTATTCTGTCTCAACA	0.0997182	Background
T1_GTCACAACAATCTGCA	0.172629	Background
T1_GTCACAACATGGGACA	0.0847708	Background
T1_GTCACAATCCCTTGTG	0.127284	Background
T1_GTCACGGGTAAATGAC	-0.352047	Background
T1_GTCACGGGTAATAGCA	0.06385	Background
T1_GTCATTTAGTGGTAGC	0.276071	High-Risk
T1_GTCATTTTCAACCATG	0.152858	Background
T1_GTCCTCACAAGGCTCC	-0.374011	Background
T1_GTCCTCACACCAGTTA	-0.287232	Background
T1_GTCCTCAGTAAGTGTA	0.12798	Background
T1_GTCCTCATCCACGCAG	0.378481	High-Risk
T1_GTCCTCATCCGCGCAA	0.114602	Background
T1_GTCGGGTTCCTAGGGC	0.111445	Background
T1_GTCGTAAAGATACACA	-0.404338	Background
T1_GTCGTAAGTGACGCCT	0.187054	Background
T1_GTCTCGTAGGGCTTCC	0.0959187	Background
T1_GTCTCGTTCGTGGTCG	-0.0990955	Background
T1_GTGAAGGTCGGTGTCG	-0.350318	Background
T1_GTGCAGCCAGATGGCA	0.134653	Background
T1_GTGCAGCGTTCTGGTA	0.270446	High-Risk
T1_GTGCATAAGCTGAACG	-0.525174	Background
T1_GTGCATACACGACGAA	0.309809	High-Risk
T1_GTGCATAGTGGAAAGA	0.0983249	Background
T1_GTGCATATCTGTGCAA	-0.213986	Background
T1_GTGCTTCAGCCCGAAA	0.0592566	Background
T1_GTGCTTCCAAGTAATG	0.392464	High-Risk
T1_GTGCTTCTCCTTGGTC	0.128577	Background
T1_GTGGGTCCAGTATAAG	0.132147	Background
T1_GTGGGTCTCCCACTTG	0.274784	High-Risk
T1_GTGTGCGAGAAACCGC	-0.282335	Background
T1_GTGTGCGAGGCATTGG	0.0111225	Background
T1_GTGTGCGCAGTCACTA	-0.0799032	Background
T1_GTGTGCGGTTCGGCAC	-0.272947	Background
T1_GTGTTAGCAGTATGCT	0.204745	Background
T1_GTGTTAGCATACCATG	-0.276888	Background
T1_GTGTTAGGTTGACGTT	-0.343857	Background
T1_GTTAAGCCAGTCTTCC	0.0612208	Background
T1_GTTAAGCTCACCTTAT	-0.349498	Background
T1_GTTACAGAGCTAGTTC	-0.509424	Background
T1_GTTACAGCAATGTTGC	-0.48989	Background
T1_GTTACAGTCACAGTAC	0.0761742	Background
T1_GTTCATTAGTGGACGT	-0.393776	Background
T1_GTTCATTGTCGATTGT	-0.506739	Background
T1_GTTCATTTCACCGGGT	0.280361	High-Risk
T1_GTTCATTTCACCGTAA	0.0958011	Background
T1_GTTCATTTCGTATCAG	0.0016405	Background
T1_GTTCGGGGTCGAATCT	-0.0909578	Background
T1_GTTCGGGTCGTTGACA	-0.100239	Background
T1_GTTCGGGTCTATCCCG	-0.165981	Background
T1_GTTCTCGAGTCCGGTC	-0.487276	Background
T1_GTTCTCGGTAGTAGTA	0.144376	Background
T1_GTTCTCGGTCTAAAGA	0.199434	Background
T1_GTTCTCGGTTTGGCGC	0.0388993	Background
T1_GTTTCTACATCGATGT	0.0666428	Background
T1_GTTTCTACATGCTAGT	-0.546468	Background
T1_TAAACCGCAACACCTA	0.433712	High-Risk
T1_TAAACCGCATTGTGCA	-0.267576	Background
T1_TAAACCGGTAAGAGGA	0.0887575	Background
T1_TAAACCGTCGAGAGCA	0.193267	Background
T1_TAAGAGAAGGTGCTTT	0.381073	High-Risk
T1_TAAGAGACAACTGCGC	-0.164764	Background
T1_TAAGAGAGTCACCCAG	0.174435	Background
T1_TAAGAGAGTTCTGTTT	0.0418572	Background
T1_TAAGAGATCTCTGCTG	0.333931	High-Risk
T1_TAAGCGTAGAGGTACC	0.119608	Background
T1_TAAGTGCAGCATCATC	0.180219	Background
T1_TAAGTGCCAGGGCATA	0.205563	Background
T1_TAAGTGCGTACCGTAT	0.0768608	Background
T1_TACACGAAGCAGATCG	0.135684	Background
T1_TACACGACAGGTCCAC	0.170289	Background
T1_TACACGAGTGCCTGGT	0.387464	High-Risk
T1_TACACGAGTGCGGTAA	-0.0479542	Background
T1_TACACGATCGACCAGC	-0.0151739	Background
T1_TACAGTGCACGACTCG	0.127713	Background
T1_TACAGTGCACTGCCAG	0.0294378	Background
T1_TACAGTGTCAGCTCGG	0.0933322	Background
T1_TACAGTGTCGCTAGCG	-0.0789361	Background
T1_TACCTATCATGCTAGT	0.129944	Background
T1_TACCTTAAGCCCAATT	0.38863	High-Risk
T1_TACCTTACAAGCCATT	-0.478728	Background
T1_TACCTTACAGGACCCT	0.124967	Background
T1_TACCTTATCAGATAAG	0.201247	Background
T1_TACCTTATCTATCCTA	-0.205803	Background
T1_TACCTTATCTCGCTTG	-0.509803	Background
T1_TACGGATAGCGTCAAG	0.084456	Background
T1_TACGGATGTCAGTGGA	0.16154	Background
T1_TACGGGCCAGCGAACA	-0.195187	Background
T1_TACGGGCGTACTTGAC	-0.0051411	Background
T1_TACGGTAAGATACACA	-0.244742	Background
T1_TACTCATTCAGTTGAC	0.186557	Background
T1_TACTCGCTCCCGACTT	0.212935	Background
T1_TACTTGTAGGTGCTAG	0.0774274	Background
T1_TACTTGTAGTGAACAT	0.0869962	Background
T1_TACTTGTGTAAAGTCA	0.307921	High-Risk
T1_TACTTGTGTTTAGCTG	0.387776	High-Risk
T1_TACTTGTTCAGTCAGT	-0.513903	Background
T1_TAGACCAAGGGTCGAT	0.195842	Background
T1_TAGACCATCCAAACAC	0.346814	High-Risk
T1_TAGAGCTTCCTCTAGC	0.296428	High-Risk
T1_TAGAGCTTCGCATGAT	-0.674291	Background
T1_TAGCCGGCACGGTTTA	-0.0692904	Background
T1_TAGCCGGCATCGGTTA	-0.386681	Background
T1_TAGCCGGTCTAGCACA	-0.0218099	Background
T1_TAGGCATGTAACGACG	0.292223	High-Risk
T1_TAGTGGTAGGGAGTAA	-0.279143	Background
T1_TAGTGGTTCAACACCA	0.135848	Background
T1_TAGTTGGAGGGAACGG	-0.638672	Background
T1_TAGTTGGCAGCCAGAA	-0.192988	Background
T1_TAGTTGGCAGGCGATA	0.14491	Background
T1_TAGTTGGGTGGCGAAT	0.347122	High-Risk
T1_TAGTTGGTCGTTGACA	0.0835506	Background
T1_TATCTCACAAGAGGCT	0.077749	Background
T1_TATCTCACAATAGAGT	0.223077	High-Risk
T1_TATGCCCAGCCAACAG	0.12399	Background
T1_TATGCCCCAATCGGTT	-0.175282	Background
T1_TATGCCCCACGACGAA	0.0936772	Background
T1_TATGCCCTCGGCATCG	-0.157254	Background
T1_TATGCCCTCTTATCTG	0.127174	Background
T1_TATTACCGTGCTTCTC	0.0690006	Background
T1_TCAACGAAGCTAAACA	0.148549	Background
T1_TCAACGACACCAGGCT	0.0126828	Background
T1_TCAACGATCAACACTG	-0.417173	Background
T1_TCAATCTAGAAAGTGG	0.0740729	Background
T1_TCAATCTAGCTTCGCG	0.145905	Background
T1_TCAATCTCAAAGGAAG	0.204409	Background
T1_TCAATCTGTATCGCAT	0.199318	Background
T1_TCAATCTGTCGACTAT	0.107096	Background
T1_TCACAAGCAGCTGTGC	-0.146618	Background
T1_TCACGAACACACAGAG	-0.511019	Background
T1_TCACGAATCACAAACC	-0.276135	Background
T1_TCAGATGCAGAGCCAA	0.141888	Background
T1_TCAGATGTCCTCAACC	0.0348879	Background
T1_TCAGCAACAGTCGATT	-0.00691947	Background
T1_TCAGCAAGTAGCAAAT	0.138707	Background
T1_TCAGCAATCATTATCC	0.0801155	Background
T1_TCAGCTCCAAACCTAC	0.130459	Background
T1_TCAGCTCGTGATAAAC	-0.110234	Background
T1_TCAGGATCACCAGGTC	0.101969	Background
T1_TCAGGATGTACTTCTT	-0.420454	Background
T1_TCATTACGTAATCACC	0.176425	Background
T1_TCATTACGTGACCAAG	0.485298	High-Risk
T1_TCATTACGTTCTGGTA	-0.236122	Background
T1_TCATTTGTCACAATGC	-0.494322	Background
T1_TCATTTGTCTACTCAT	0.109581	Background
T1_TCCACACAGGACATTA	0.228535	High-Risk
T1_TCCACACGTCTTTCAT	0.083958	Background
T1_TCCACACGTTACGGAG	0.119523	Background
T1_TCCCGATCAGGGTATG	0.0113709	Background
T1_TCGAGGCTCAGCTTAG	-0.448975	Background
T1_TCGCGAGCAAGCTGGA	-0.0235963	Background
T1_TCGCGTTCATGCGCAC	-0.157326	Background
T1_TCGCGTTTCAACACTG	-0.00510265	Background
T1_TCGCGTTTCACATAGC	-0.0910722	Background
T1_TCGGGACCACTAAGTC	0.347626	High-Risk
T1_TCGGGACGTTAAGAAC	0.198	Background
T1_TCGGTAAAGTACCGGA	0.140888	Background
T1_TCGGTAACAACGATGG	0.113231	Background
T1_TCGGTAATCCCTGACT	0.212037	Background
T1_TCGGTAATCTTGCATT	-0.235859	Background
T1_TCGTACCAGAGTCTGG	0.0989724	Background
T1_TCGTACCAGTTATCGC	-0.492488	Background
T1_TCGTACCTCTAGCACA	-0.183232	Background
T1_TCGTAGACAGCTGGCT	0.255737	High-Risk
T1_TCGTAGAGTGGGTCAA	0.0612613	Background
T1_TCGTAGAGTTGGTTTG	-0.183992	Background
T1_TCTATTGAGGGATACC	0.153279	Background
T1_TCTATTGCAGGGAGAG	-0.498143	Background
T1_TCTATTGTCGGTTCGG	0.133579	Background
T1_TCTATTGTCGTCACGG	-0.320113	Background
T1_TCTATTGTCTACTATC	-0.499393	Background
T1_TCTATTGTCTCAAGTG	0.118273	Background
T1_TCTCATAAGTTCCACA	-0.342036	Background
T1_TCTCATACAGACAAAT	0.364322	High-Risk
T1_TCTCATACAGACAAGC	0.108047	Background
T1_TCTCATACAGTCCTTC	0.342129	High-Risk
T1_TCTCATACATGTCGAT	0.356515	High-Risk
T1_TCTCATAGTATCAGTC	0.450809	High-Risk
T1_TCTCATATCTTACCTA	0.0464165	Background
T1_TCTCTAAAGTCTCCTC	0.17541	Background
T1_TCTCTAATCCTGCTTG	0.0767782	Background
T1_TCTGAGAAGAAGAAGC	-0.362593	Background
T1_TCTGGAAAGCACACAG	-0.210405	Background
T1_TCTGGAAGTTACTGAC	0.395517	High-Risk
T1_TCTTCGGAGACCACGA	0.403089	High-Risk
T1_TCTTCGGCAATGGATA	0.274183	High-Risk
T1_TCTTTCCTCATACGGT	0.222636	High-Risk
T1_TCTTTCCTCTTAGCCC	-0.475215	Background
T1_TGAAAGAAGGACAGAA	0.33958	High-Risk
T1_TGAAAGACACCGTTGG	0.209561	Background
T1_TGAAAGACACTTAAGC	-0.0220624	Background
T1_TGAAAGATCACAAACC	0.100386	Background
T1_TGACAACAGAATGTGT	-0.525799	Background
T1_TGACGGCAGAATAGGG	0.027366	Background
T1_TGACGGCTCGGCATCG	-0.443142	Background
T1_TGACTAGGTCTAAAGA	-0.131972	Background
T1_TGACTAGTCCTGCAGG	0.212276	Background
T1_TGACTTTGTAGTGAAT	0.142545	Background
T1_TGAGAGGCATGCAACT	0.394162	High-Risk
T1_TGAGAGGGTCAAAGAT	-0.36922	Background
T1_TGAGAGGTCATCTGTT	-0.488186	Background
T1_TGAGCATTCGGCGGTT	-0.298182	Background
T1_TGAGCCGAGTACGCGA	0.240794	High-Risk
T1_TGAGCCGCACCGTTGG	0.145657	Background
T1_TGAGCCGTCCCTCTTT	-0.329008	Background
T1_TGAGGGAAGGCAGTCA	0.0809359	Background
T1_TGATTTCAGCACCGTC	-0.487579	Background
T1_TGATTTCGTTGACGTT	0.0768025	Background
T1_TGCACCTAGACATAAC	-0.45935	Background
T1_TGCACCTGTCGGCACT	-0.513478	Background
T1_TGCCAAAAGGTGCTTT	-0.219704	Background
T1_TGCCAAAAGTGGCACA	0.389824	High-Risk
T1_TGCCAAACACGAGAGT	0.0574989	Background
T1_TGCCAAATCATCACCC	-0.505728	Background
T1_TGCCAAATCTGCAAGT	0.0973529	Background
T1_TGCCCATTCCTTTCGG	-0.36354	Background
T1_TGCCCTATCTATCGCC	0.429131	High-Risk
T1_TGCGCAGCAGGATTGG	0.409201	High-Risk
T1_TGCGCAGGTACTTGAC	0.188396	Background
T1_TGCGCAGTCACCATAG	0.12554	Background
T1_TGCGCAGTCTGGAGCC	0.119704	Background
T1_TGCGGGTCACAGAGGT	0.409492	High-Risk
T1_TGCGGGTCATCCCACT	0.12752	Background
T1_TGCGGGTGTACAGACG	-0.529012	Background
T1_TGCGGGTTCCTCTAGC	0.0980201	Background
T1_TGCGTGGTCGTGGTCG	-0.534699	Background
T1_TGCTACCGTACACCGC	0.161333	Background
T1_TGCTACCTCCAGTATG	-0.50568	Background
T1_TGCTGCTCAACTGGCC	-0.0248095	Background
T1_TGCTGCTCATTAGGCT	-0.141979	Background
T1_TGGACGCCAATACGCT	-0.042208	Background
T1_TGGACGCCAATGGAGC	-0.37623	Background
T1_TGGACGCGTCTTGATG	0.0944507	Background
T1_TGGACGCTCCATGCTC	0.119025	Background
T1_TGGCCAGAGCAACGGT	0.0646577	Background
T1_TGGCCAGTCCACGTTC	0.0012937	Background
T1_TGGCTGGGTACGAAAT	0.129409	Background
T1_TGGCTGGTCTGTGCAA	-0.232813	Background
T1_TGGGAAGGTTGATTCG	0.063525	Background
T1_TGGGCGTAGATCACGG	0.0816572	Background
T1_TGGGCGTAGGAGTACC	0.315052	High-Risk
T1_TGGTTCCCAATGCCAT	0.0803202	Background
T1_TGGTTCCGTCAAACTC	-0.395482	Background
T1_TGGTTCCGTCTCAACA	0.3102	High-Risk
T1_TGTCCCAAGGCAGTCA	0.332988	High-Risk
T1_TGTCCCACAAAGCGGT	0.118148	Background
T1_TGTCCCAGTCTCCACT	0.140008	Background
T1_TGTGGTAGTAACGACG	0.418749	High-Risk
T1_TGTGGTAGTTGGTAAA	-0.507914	Background
T1_TGTGGTATCTATCGCC	-0.121181	Background
T1_TGTGTTTCAATAGCAA	-0.487787	Background
T1_TGTGTTTCAGCTCGCA	-0.408248	Background
T1_TGTGTTTTCATTGCGA	-0.0367249	Background
T1_TGTTCCGTCAACACTG	0.257325	High-Risk
T1_TTAACTCAGCTAGTCT	0.150197	Background
T1_TTAACTCAGGAATTAC	0.111339	Background
T1_TTAACTCCAGGCTCAC	0.17333	Background
T1_TTAACTCTCATGTCTT	0.251977	High-Risk
T1_TTAACTCTCGCGCCAA	0.12006	Background
T1_TTAGGACAGCGTCTAT	0.330165	High-Risk
T1_TTAGGACCATGCAATC	-0.511812	Background
T1_TTAGGCAAGAAACGAG	-0.466735	Background
T1_TTAGTTCAGTGTACTC	-0.409301	Background
T1_TTAGTTCGTAGCACGA	-0.332473	Background
T1_TTAGTTCGTCCCGACA	0.338972	High-Risk
T1_TTAGTTCGTTTGACTG	-0.213411	Background
T1_TTATGCTGTAGCGATG	-0.492747	Background
T1_TTCCCAGAGGAATTAC	-0.515547	Background
T1_TTCCCAGTCCTAGTGA	0.127978	Background
T1_TTCGAAGAGACAATAC	-0.259134	Background
T1_TTCGAAGCAACTGGCC	0.270142	High-Risk
T1_TTCGAAGCAATGAAAC	-0.454138	Background
T1_TTCGGTCGTGACTCAT	0.11395	Background
T1_TTCGGTCGTTATCGGT	-0.327492	Background
T1_TTCTACAGTAGCTCCG	0.20817	Background
T1_TTCTCAAAGACTGTAA	-0.0315624	Background
T1_TTCTCAACATCCGTGG	-0.209799	Background
T1_TTCTCAAGTAGCTGCC	0.470257	High-Risk
T1_TTCTCAAGTTCCGTCT	0.370073	High-Risk
T1_TTCTCAATCGCCAAAT	0.0571955	Background
T1_TTCTCAATCGGCCGAT	0.270859	High-Risk
T1_TTCTCCTAGATGCGAC	-0.32817	Background
T1_TTCTCCTGTAAGAGAG	0.0821434	Background
T1_TTCTCCTGTATGGTTC	0.222147	High-Risk
T1_TTCTCCTGTCACCCAG	0.331158	High-Risk
T1_TTCTCCTTCTACTCAT	0.0498374	Background
T1_TTCTTAGAGTGGGATC	0.0810365	Background
T1_TTCTTAGTCAGAGACG	0.113332	Background
T1_TTGCCGTGTTCCACAA	0.381137	High-Risk
T1_TTGCCGTGTTCCACGG	-0.0380895	Background
T1_TTGCGTCAGCAACGGT	0.113611	Background
T1_TTGCGTCGTCTTCTCG	0.127043	Background
T1_TTGCGTCGTTCGGGCT	-0.487975	Background
T1_TTGCGTCTCAGCCTAA	0.0484042	Background
T1_TTGGAACAGGCTATCT	-0.507904	Background
T1_TTGGAACGTAGTACCT	0.0758289	Background
T1_TTGGAACTCATATCGG	0.337741	High-Risk
T1_TTGGAACTCCCAACGG	-0.410665	Background
T1_TTGGCAAAGTACGCGA	0.0673941	Background
T1_TTGGCAACAGCATGAG	0.180652	Background
T1_TTGGCAAGTCATCCCT	0.104389	Background
T1_TTGGCAATCGTAGGTT	0.317514	High-Risk
T1_TTGTAGGAGTCGAGTG	0.368851	High-Risk
T1_TTGTAGGAGTGGAGAA	-0.327979	Background
T1_TTGTAGGGTGCAACGA	-0.154615	Background
T1_TTTACTGCATGAAGTA	-0.184635	Background
T1_TTTACTGGTGCCTGGT	0.106573	Background
T1_TTTACTGGTTGATTCG	-0.0755719	Background
T1_TTTACTGTCACTATTC	0.0790134	Background
T1_TTTACTGTCGTGGTCG	-0.189857	Background
T1_TTTATGCTCCAGAAGG	0.216413	Background
T1_TTTATGCTCTTACCGC	0.153499	Background
T1_TTTGCGCCAGTCCTTC	-0.370787	Background
T1_TTTGCGCGTGATAAAC	-0.463776	Background
T1_TTTGGTTAGCCACCTG	0.40465	High-Risk
T1_TTTGGTTCAAATACAG	-0.503009	Background
T1_TTTGGTTGTTTGGCGC	0.0444318	Background
T1_TTTGTCAAGGGTTCCC	-0.49844	Background
T1_TTTGTCATCCTTTCGG	0.126981	Background
T1_TTTGTCATCTAAGCCA	0.151309	Background
T2_AAACCTGCACCACGTG	-0.0288162	Background
T2_AAACCTGCAGGGTACA	-0.394702	Background
T2_AAACCTGCAGGGTTAG	-0.239009	Background
T2_AAACCTGCATGGGACA	-0.098702	Background
T2_AAACCTGGTCAAGCGA	-0.0731904	Background
T2_AAACCTGGTTCGAATC	0.195984	Background
T2_AAACCTGTCTCATTCA	0.0839193	Background
T2_AAACGGGAGGTGACCA	-0.201475	Background
T2_AAACGGGCAGTCTTCC	-0.247585	Background
T2_AAACGGGGTCCATCCT	0.105584	Background
T2_AAACGGGTCATTGCCC	-0.150487	Background
T2_AAACGGGTCGGTGTTA	-0.254184	Background
T2_AAACGGGTCTGCTGCT	0.345022	High-Risk
T2_AAAGATGAGCTGATAA	0.129606	Background
T2_AAAGATGAGCTTCGCG	-0.189303	Background
T2_AAAGATGGTCGTGGCT	0.115975	Background
T2_AAAGATGGTGGTAACG	0.425398	High-Risk
T2_AAAGATGTCACTTATC	-0.301135	Background
T2_AAAGATGTCCTAGTGA	-0.182166	Background
T2_AAAGATGTCTATCCCG	-0.139493	Background
T2_AAAGCAAAGCACACAG	-0.236236	Background
T2_AAAGCAAAGCGATAGC	-0.365824	Background
T2_AAAGCAACAAGGACAC	-0.373859	Background
T2_AAAGCAACACAGGCCT	-0.324595	Background
T2_AAAGCAACACGGTGTC	-0.13358	Background
T2_AAAGCAACAGATGAGC	0.140532	Background
T2_AAAGCAACAGTGGAGT	0.380634	High-Risk
T2_AAAGCAAGTTTGTTTC	0.00599476	Background
T2_AAAGCAATCGCAAACT	-0.330373	Background
T2_AAAGCAATCTAGAGTC	0.238137	High-Risk
T2_AAAGTAGAGCGTGTCC	0.233626	High-Risk
T2_AAAGTAGCAATCTACG	-0.333725	Background
T2_AAAGTAGGTCAATACC	-0.325707	Background
T2_AAAGTAGGTCAGAGGT	0.118319	Background
T2_AAATGCCAGACACGAC	-0.152422	Background
T2_AAATGCCAGATGCGAC	0.122096	Background
T2_AAATGCCAGCACGCCT	-0.166837	Background
T2_AAATGCCAGTGACATA	-0.385437	Background
T2_AAATGCCCAAGCCGCT	-0.18008	Background
T2_AAATGCCCATGCAATC	-0.276996	Background
T2_AAATGCCTCGGTCCGA	0.0790093	Background
T2_AACACGTAGAGTACAT	-0.585333	Background
T2_AACACGTAGTGTTAGA	0.339404	High-Risk
T2_AACACGTCACAGCCCA	0.0150728	Background
T2_AACACGTTCCTGTAGA	-0.333808	Background
T2_AACACGTTCTCTAAGG	-0.508837	Background
T2_AACACGTTCTTAGAGC	0.0293566	Background
T2_AACCATGAGCTGTCTA	-0.528555	Background
T2_AACCATGAGGTAGCTG	0.128911	Background
T2_AACCATGCATTTCACT	-0.217193	Background
T2_AACCATGGTAGCCTCG	0.0230244	Background
T2_AACCATGGTCACCCAG	0.309469	High-Risk
T2_AACCATGGTTGGACCC	-0.138183	Background
T2_AACCATGTCCACGTTC	-0.0814008	Background
T2_AACCATGTCCCGACTT	0.0134788	Background
T2_AACCGCGCACGTGAGA	0.0818861	Background
T2_AACCGCGTCAGTTTGG	0.171147	Background
T2_AACCGCGTCCGCATAA	-0.33069	Background
T2_AACCGCGTCGAGAGCA	-0.418196	Background
T2_AACCGCGTCTGCGTAA	-0.381781	Background
T2_AACGTTGAGACCTAGG	-0.320838	Background
T2_AACGTTGCATCGGAAG	0.215051	Background
T2_AACGTTGCATGGTCAT	0.083711	Background
T2_AACGTTGGTCAGAATA	-0.570001	Background
T2_AACGTTGTCGTACCGG	-0.125576	Background
T2_AACGTTGTCTGATTCT	0.216559	Background
T2_AACTCAGAGAAGAAGC	-0.490544	Background
T2_AACTCAGAGATAGCAT	-0.411721	Background
T2_AACTCAGGTAAACACA	-0.263906	Background
T2_AACTCAGGTCTTGTCC	0.0363086	Background
T2_AACTCAGGTTCCACAA	-0.310989	Background
T2_AACTCAGTCGCCTGAG	0.0352099	Background
T2_AACTCCCAGAGGGATA	-0.148958	Background
T2_AACTCCCGTCATCCCT	-0.327754	Background
T2_AACTCTTCAAGTACCT	-0.285501	Background
T2_AACTCTTCAAGTCTGT	0.0723642	Background
T2_AACTCTTCATTGTGCA	-0.271628	Background
T2_AACTCTTGTATCACCA	0.0315033	Background
T2_AACTCTTTCCTCGCAT	-0.441814	Background
T2_AACTGGTAGAGTACCG	-0.496823	Background
T2_AACTGGTCAAGCCTAT	-0.0237739	Background
T2_AACTGGTGTTCGGCAC	0.217076	Background
T2_AACTGGTTCATAGCAC	-0.140248	Background
T2_AACTGGTTCTTTAGGG	-0.438411	Background
T2_AACTTTCCAAGAGGCT	0.0899946	Background
T2_AACTTTCCACGGTAAG	-0.513033	Background
T2_AACTTTCCAGGGTTAG	0.172733	Background
T2_AACTTTCTCGGTTCGG	-0.27878	Background
T2_AACTTTCTCTCAAGTG	-0.377238	Background
T2_AAGACCTAGAGAGCTC	0.124692	Background
T2_AAGACCTAGTAGTGCG	-0.477306	Background
T2_AAGACCTCAACTGCGC	-0.309409	Background
T2_AAGACCTCACATGGGA	0.286132	High-Risk
T2_AAGACCTCACTTCTGC	0.0762002	Background
T2_AAGACCTCAGCGTTCG	-0.209185	Background
T2_AAGACCTGTTCGCTAA	0.0141878	Background
T2_AAGACCTTCATGTAGC	-0.402273	Background
T2_AAGACCTTCCTAGAAC	-0.345086	Background
T2_AAGCCGCAGCTAGTTC	0.0195458	Background
T2_AAGCCGCCATGACGGA	0.00104415	Background
T2_AAGCCGCGTGTCAATC	-0.131862	Background
T2_AAGCCGCGTTTAGCTG	0.167797	Background
T2_AAGCCGCTCACCGTAA	0.0985196	Background
T2_AAGCCGCTCTGAAAGA	-0.400643	Background
T2_AAGGAGCAGCCTCGTG	-0.136529	Background
T2_AAGGAGCCATAGTAAG	-0.339548	Background
T2_AAGGAGCGTATTCGTG	-0.00241706	Background
T2_AAGGAGCGTCTACCTC	0.0557605	Background
T2_AAGGAGCGTGCGAAAC	-0.473613	Background
T2_AAGGAGCGTTCAGTAC	0.410844	High-Risk
T2_AAGGAGCTCCTGCTTG	-0.374636	Background
T2_AAGGAGCTCTTAACCT	-0.395488	Background
T2_AAGGCAGCAGGGAGAG	-0.00555424	Background
T2_AAGGCAGGTCCGCTGA	-0.371345	Background
T2_AAGGCAGGTTTGTTGG	-0.428838	Background
T2_AAGGCAGTCCCATTTA	-0.259422	Background
T2_AAGGTTCAGATCGATA	-0.153443	Background
T2_AAGGTTCAGCTGAAAT	0.399102	High-Risk
T2_AAGGTTCAGGCTCAGA	-0.129213	Background
T2_AAGGTTCAGTGGAGTC	0.0183629	Background
T2_AAGGTTCGTGTGACGA	-0.0667526	Background
T2_AAGGTTCGTTGCGCAC	0.0855739	Background
T2_AAGGTTCTCGATCCCT	-0.313792	Background
T2_AAGTCTGCAGGTCGTC	0.00138141	Background
T2_AAGTCTGGTAAACGCG	-0.244568	Background
T2_AAGTCTGGTACCATCA	-0.268787	Background
T2_AAGTCTGGTCGGCTCA	0.389707	High-Risk
T2_AAGTCTGTCGCATGAT	0.0793992	Background
T2_AAGTCTGTCTCAACTT	0.40864	High-Risk
T2_AATCCAGAGAGACTAT	0.210648	Background
T2_AATCCAGCAGTAAGAT	0.0472737	Background
T2_AATCCAGGTTAAAGAC	-0.259386	Background
T2_AATCCAGGTTGTGGCC	-0.408612	Background
T2_AATCCAGGTTTGTTTC	-0.296728	Background
T2_AATCGGTAGCCACTAT	0.0491437	Background
T2_AATCGGTAGTTAGCGG	-0.289466	Background
T2_AATCGGTCACTATCTT	0.0457507	Background
T2_AATCGGTGTTAAGTAG	-0.0879107	Background
T2_AATCGGTGTTAGATGA	-0.457763	Background
T2_AATCGGTGTTCAGCGC	0.109493	Background
T2_AATCGGTTCAGAGACG	-0.221281	Background
T2_AATCGGTTCGAGAACG	0.0283461	Background
T2_ACACCAAAGCGACGTA	-0.147085	Background
T2_ACACCAAAGCGATTCT	-0.200392	Background
T2_ACACCAACACGGCCAT	-0.256666	Background
T2_ACACCAAGTAGGCTGA	0.144312	Background
T2_ACACCAAGTCCAGTAT	0.27513	High-Risk
T2_ACACCAAGTCGTTGTA	-0.376916	Background
T2_ACACCAATCTGGTATG	-0.00748833	Background
T2_ACACCCTAGCTGTCTA	-0.287003	Background
T2_ACACCCTCAACAACCT	-0.299806	Background
T2_ACACCCTCACAAGTAA	0.096004	Background
T2_ACACCCTGTCGCGTGT	0.128858	Background
T2_ACACCCTGTGTGTGCC	0.0216841	Background
T2_ACACCCTGTGTTCTTT	-0.173965	Background
T2_ACACCCTTCACCAGGC	0.116698	Background
T2_ACACCCTTCGAACTGT	0.0144596	Background
T2_ACACCCTTCTCTGTCG	-0.178772	Background
T2_ACACCGGCAAAGGAAG	-0.10043	Background
T2_ACACCGGCAAGGCTCC	-0.194553	Background
T2_ACACCGGCATAAGACA	-0.301703	Background
T2_ACACCGGGTGGTACAG	-0.331473	Background
T2_ACACCGGGTTGGTGGA	-0.106905	Background
T2_ACACTGAAGACCACGA	0.235767	High-Risk
T2_ACACTGAAGACTGGGT	-0.397269	Background
T2_ACACTGAAGCTATGCT	-0.326662	Background
T2_ACACTGACACTTCTGC	-0.231818	Background
T2_ACACTGAGTCTTTCAT	-0.266876	Background
T2_ACACTGATCCCTTGCA	-0.0608339	Background
T2_ACACTGATCCGTAGGC	-0.275643	Background
T2_ACACTGATCCTTTCTC	0.386084	High-Risk
T2_ACAGCCGAGACTAGGC	-0.287533	Background
T2_ACAGCCGAGAGGTACC	0.0917419	Background
T2_ACAGCCGAGCAGGTCA	-0.359731	Background
T2_ACAGCCGAGGGATCTG	0.134732	Background
T2_ACAGCCGCACGGCGTT	0.318344	High-Risk
T2_ACAGCCGCATACTACG	-0.205221	Background
T2_ACAGCCGTCAACGCTA	-0.557558	Background
T2_ACAGCTACACAACTGT	-0.572535	Background
T2_ACAGCTACATTTGCTT	-0.105006	Background
T2_ACAGCTAGTCGTGGCT	0.12549	Background
T2_ACAGCTAGTTTAGGAA	-0.296294	Background
T2_ACAGCTATCAAGCCTA	-0.101735	Background
T2_ACAGCTATCTCATTCA	-0.360686	Background
T2_ACAGCTATCTTTACGT	-0.168788	Background
T2_ACATACGAGAGCTTCT	-0.532584	Background
T2_ACATACGAGAGGTTGC	0.0906161	Background
T2_ACATACGAGGATGGTC	-0.325126	Background
T2_ACATACGCACAGATTC	-0.245309	Background
T2_ACATACGCAGCTTCGG	0.307347	High-Risk
T2_ACATACGGTTGACGTT	-0.547597	Background
T2_ACATCAGAGACTTTCG	-0.352969	Background
T2_ACATCAGAGCCACTAT	-0.245985	Background
T2_ACATCAGAGGGTCTCC	-0.0771222	Background
T2_ACATCAGGTTCAGTAC	-0.216364	Background
T2_ACATCAGGTTGGTGGA	-0.460341	Background
T2_ACATCAGTCCAAATGC	-0.480823	Background
T2_ACATGGTAGTGCAAGC	-0.343638	Background
T2_ACATGGTCATCACCCT	-0.186392	Background
T2_ACATGGTGTAAACCTC	-0.111737	Background
T2_ACATGGTGTCGAATCT	-0.252926	Background
T2_ACATGGTGTCTGCAAT	-0.215772	Background
T2_ACATGGTGTGCTTCTC	-0.260011	Background
T2_ACATGGTTCAACACAC	-0.507022	Background
T2_ACATGGTTCAGGCCCA	-0.456902	Background
T2_ACCAGTAAGAGCCCAA	-0.340415	Background
T2_ACCAGTAAGTAGCCGA	0.0973462	Background
T2_ACCAGTACAAGCTGAG	-0.226925	Background
T2_ACCAGTACACAGGAGT	0.0614892	Background
T2_ACCAGTAGTCATTAGC	-0.4802	Background
T2_ACCAGTAGTCGTGGCT	-0.261474	Background
T2_ACCAGTAGTTCACGGC	-0.380382	Background
T2_ACCAGTAGTTCATGGT	-0.298661	Background
T2_ACCAGTATCAGCATGT	-0.337739	Background
T2_ACCAGTATCCGTACAA	-0.271288	Background
T2_ACCAGTATCGACCAGC	0.144781	Background
T2_ACCCACTAGAACTGTA	0.36346	High-Risk
T2_ACCCACTAGATCCCAT	-0.201992	Background
T2_ACCCACTAGCTCTCGG	-0.383035	Background
T2_ACCCACTCAAAGCAAT	-0.362987	Background
T2_ACCCACTCACATTAGC	-0.021436	Background
T2_ACCCACTCAGACACTT	-0.545198	Background
T2_ACCCACTCAGATAATG	-0.050321	Background
T2_ACCCACTCAGCTGCAC	0.0672273	Background
T2_ACCCACTCATAAGACA	-0.0987073	Background
T2_ACCCACTTCGCATGAT	0.31186	High-Risk
T2_ACCGTAACACCCATGG	0.194813	Background
T2_ACCGTAACACGTGAGA	0.291355	High-Risk
T2_ACCGTAAGTGTTCGAT	-0.406544	Background
T2_ACCGTAAGTGTTTGGT	-0.278442	Background
T2_ACCGTAATCAAAGACA	-0.0558386	Background
T2_ACCGTAATCAACTCTT	0.0160385	Background
T2_ACCGTAATCGTTTAGG	-0.154366	Background
T2_ACCTTTACAGACGCCT	-0.047921	Background
T2_ACCTTTACAGCTTCGG	-0.199097	Background
T2_ACCTTTATCGCGCCAA	-0.259116	Background
T2_ACGAGCCAGGAGTACC	-0.11423	Background
T2_ACGAGCCAGTACTTGC	0.0441276	Background
T2_ACGAGCCAGTGAATTG	-0.319107	Background
T2_ACGAGCCAGTGTACGG	-0.412453	Background
T2_ACGAGCCCAAGTCTAC	0.268522	High-Risk
T2_ACGAGCCTCTTAACCT	-0.1942	Background
T2_ACGAGGAAGCTATGCT	-0.173533	Background
T2_ACGAGGAAGTAGCCGA	0.0457788	Background
T2_ACGAGGACACCACCAG	0.188117	Background
T2_ACGAGGACAGGAATCG	-0.242789	Background
T2_ACGAGGACATTGCGGC	-0.241514	Background
T2_ACGAGGAGTAGAGCTG	0.160619	Background
T2_ACGATACAGACCGGAT	0.117368	Background
T2_ACGATACAGAGCTGGT	0.0628092	Background
T2_ACGATACAGATGAGAG	-0.315775	Background
T2_ACGATACGTGAAGGCT	-0.408185	Background
T2_ACGATACTCTCTGTCG	0.183745	Background
T2_ACGATGTAGCCTATGT	-0.0897763	Background
T2_ACGATGTGTCTAGGTT	0.219386	High-Risk
T2_ACGATGTGTGTATGGG	-0.322302	Background
T2_ACGATGTTCAACACAC	0.0806286	Background
T2_ACGATGTTCTCGCATC	0.299731	High-Risk
T2_ACGCAGCAGATCCTGT	-0.281343	Background
T2_ACGCAGCAGTGGTCCC	-0.3095	Background
T2_ACGCAGCCAAGCTGAG	-0.0639109	Background
T2_ACGCAGCGTAGTACCT	0.0849378	Background
T2_ACGCAGCGTGCGCTTG	-0.262476	Background
T2_ACGCAGCTCCGCATCT	0.166374	Background
T2_ACGCAGCTCTTGTCAT	-0.321185	Background
T2_ACGCCAGAGGCTCAGA	-0.233913	Background
T2_ACGCCAGGTTTCGCTC	-0.146319	Background
T2_ACGCCAGTCACCGTAA	-0.361503	Background
T2_ACGCCGAAGCTAGCCC	-0.549633	Background
T2_ACGCCGACACAGGAGT	-0.25674	Background
T2_ACGCCGAGTAAATACG	0.244013	High-Risk
T2_ACGCCGATCAGGCAAG	-0.267489	Background
T2_ACGCCGATCTGATACG	-0.311679	Background
T2_ACGGAGAAGGCACATG	0.0310482	Background
T2_ACGGAGAAGTGAAGAG	0.120709	Background
T2_ACGGAGAGTAACGCGA	-0.457798	Background
T2_ACGGAGAGTTGCTCCT	-0.39202	Background
T2_ACGGAGATCCTGCCAT	-0.282675	Background
T2_ACGGAGATCTCGCATC	-0.206917	Background
T2_ACGGCCAAGATTACCC	0.120236	Background
T2_ACGGCCAAGGCCATAG	-0.294891	Background
T2_ACGGCCAAGTACTTGC	-0.195241	Background
T2_ACGGCCAAGTAGGCCA	-0.0955313	Background
T2_ACGGCCACACCATGTA	-0.529506	Background
T2_ACGGCCACACGCCAGT	-0.0588962	Background
T2_ACGGCCATCGGCGCTA	0.0418949	Background
T2_ACGGGCTAGCTTTGGT	0.045353	Background
T2_ACGGGCTAGGTGCAAC	-0.0834301	Background
T2_ACGGGCTAGTTGAGAT	-0.594321	Background
T2_ACGGGCTCATGTCTCC	-0.495834	Background
T2_ACGGGCTGTACAGTTC	0.0240737	Background
T2_ACGGGCTTCTCAAGTG	-0.189174	Background
T2_ACGGGTCAGCGAGAAA	-0.119137	Background
T2_ACGGGTCCAAGCGTAG	0.250693	High-Risk
T2_ACGGGTCGTGCTTCTC	0.0989098	Background
T2_ACGGGTCTCCTGCCAT	-0.319923	Background
T2_ACGTCAAAGATCTGCT	-0.0032129	Background
T2_ACGTCAAAGGCGCTCT	0.0100812	Background
T2_ACGTCAAAGTTGAGAT	0.224558	High-Risk
T2_ACGTCAACAGAGTGTG	0.125671	Background
T2_ACGTCAACAGCTCGCA	-0.031345	Background
T2_ACGTCAAGTCAAAGAT	-0.51458	Background
T2_ACGTCAATCAGCTCGG	-0.234263	Background
T2_ACGTCAATCCGCGCAA	-0.0283011	Background
T2_ACGTCAATCGCACTCT	-0.242184	Background
T2_ACGTCAATCGGTGTTA	0.00567898	Background
T2_ACGTCAATCTAAGCCA	0.176023	Background
T2_ACTATCTAGTTAGGTA	0.0493097	Background
T2_ACTATCTCATAGTAAG	-0.319966	Background
T2_ACTATCTGTCTCCATC	-0.230724	Background
T2_ACTATCTTCAGTTCGA	-0.227496	Background
T2_ACTATCTTCTTGAGGT	-0.228531	Background
T2_ACTGAACAGATCCCGC	-0.381527	Background
T2_ACTGAACAGCAGCGTA	0.0985432	Background
T2_ACTGAACCACTTAACG	-0.207088	Background
T2_ACTGAACTCTGCGGCA	0.0297495	Background
T2_ACTGAACTCTTTAGTC	0.0493671	Background
T2_ACTGAGTAGAGCTGCA	0.148301	Background
T2_ACTGAGTAGCACAGGT	-0.0049288	Background
T2_ACTGAGTAGCAGACTG	0.235548	High-Risk
T2_ACTGAGTAGTGTACGG	0.0168124	Background
T2_ACTGAGTCACCAGATT	-0.236396	Background
T2_ACTGAGTGTCTTTCAT	-0.267335	Background
T2_ACTGAGTGTGTAATGA	-0.260499	Background
T2_ACTGAGTTCAACACGT	-0.447586	Background
T2_ACTGAGTTCAATCACG	-0.321196	Background
T2_ACTGAGTTCCACTCCA	-0.39787	Background
T2_ACTGAGTTCCTCGCAT	-0.333797	Background
T2_ACTGAGTTCGTGACAT	-0.367508	Background
T2_ACTGATGAGACAATAC	-0.314796	Background
T2_ACTGATGAGAGCTGCA	0.0449996	Background
T2_ACTGATGAGTAGATGT	0.334144	High-Risk
T2_ACTGATGAGTGTCCAT	0.279072	High-Risk
T2_ACTGATGAGTGTGAAT	-0.56923	Background
T2_ACTGATGCATAAAGGT	0.231956	High-Risk
T2_ACTGATGCATGCGCAC	-0.170293	Background
T2_ACTGATGCATGTAGTC	-0.349846	Background
T2_ACTGATGGTCGGCATC	-0.305909	Background
T2_ACTGATGGTTCGTCTC	-0.121034	Background
T2_ACTGATGTCTTGAGAC	-0.0311782	Background
T2_ACTGCTCAGCACACAG	-0.462438	Background
T2_ACTGCTCAGCGTCTAT	0.173139	Background
T2_ACTGCTCAGCTCAACT	-0.255839	Background
T2_ACTGCTCCAGCGTCCA	-0.0511769	Background
T2_ACTGCTCTCTGCGGCA	-0.08847	Background
T2_ACTGTCCAGTTTGCGT	-0.311971	Background
T2_ACTGTCCCATGACGGA	0.150456	Background
T2_ACTGTCCCATGCCTAA	-0.40083	Background
T2_ACTGTCCTCCTCGCAT	-0.294185	Background
T2_ACTGTCCTCTTCGAGA	0.16928	Background
T2_ACTTACTAGGCTCTTA	-0.352895	Background
T2_ACTTACTCAGCTATTG	0.478732	High-Risk
T2_ACTTACTTCCATGAAC	-0.34072	Background
T2_ACTTACTTCTGATACG	0.352961	High-Risk
T2_ACTTGTTAGATGCCTT	-0.425145	Background
T2_ACTTGTTAGGATTCGG	-0.252409	Background
T2_ACTTGTTCAAACTGTC	0.0367286	Background
T2_ACTTGTTCAGCCAATT	-0.120916	Background
T2_ACTTGTTCAGTCTTCC	-0.139596	Background
T2_ACTTGTTGTAGTACCT	0.040677	Background
T2_ACTTGTTGTATCTGCA	-0.436335	Background
T2_ACTTGTTGTGATGTCT	-0.332993	Background
T2_ACTTGTTTCATGCAAC	-0.102536	Background
T2_ACTTGTTTCGGTGTTA	-0.477562	Background
T2_ACTTTCAAGAGTACCG	0.429581	High-Risk
T2_ACTTTCAAGTAATCCC	0.0828568	Background
T2_ACTTTCACACGTCAGC	-0.306451	Background
T2_ACTTTCATCAGTTTGG	-0.279419	Background
T2_ACTTTCATCCACTCCA	0.173954	Background
T2_ACTTTCATCCGTTGCT	0.19279	Background
T2_AGAATAGAGGGTCTCC	-0.20989	Background
T2_AGAATAGTCAGGTAAA	0.00551981	Background
T2_AGAATAGTCCGGCACA	-0.168364	Background
T2_AGAATAGTCGTTGCCT	-0.34623	Background
T2_AGAATAGTCTCATTCA	-0.228771	Background
T2_AGACGTTAGACTTTCG	-0.00396989	Background
T2_AGACGTTGTAAATGTG	0.0375468	Background
T2_AGACGTTTCCGTACAA	-0.0250432	Background
T2_AGACGTTTCTTCGGTC	-0.194844	Background
T2_AGAGCGAAGACAAAGG	-0.277321	Background
T2_AGAGCGAAGACGCAAC	-0.117652	Background
T2_AGAGCGAAGGGATGGG	-0.223799	Background
T2_AGAGCGACAGCTGGCT	-0.406708	Background
T2_AGAGCGAGTTCCACTC	-0.322647	Background
T2_AGAGCTTCACGTGAGA	-0.483649	Background
T2_AGAGCTTCATCGGGTC	-0.298527	Background
T2_AGAGCTTGTAAACCTC	-0.226484	Background
T2_AGAGCTTTCCTTCAAT	-0.268153	Background
T2_AGAGCTTTCTTCGAGA	-0.300856	Background
T2_AGAGTGGCACTGCCAG	-0.48009	Background
T2_AGAGTGGCAGATTGCT	-0.357427	Background
T2_AGAGTGGGTCATCGGC	0.11685	Background
T2_AGAGTGGTCAATAAGG	-0.218039	Background
T2_AGATCTGAGAGATGAG	-0.302993	Background
T2_AGATCTGAGCGCCTTG	-0.402745	Background
T2_AGATCTGAGTACATGA	-0.344845	Background
T2_AGATCTGCATTCACTT	0.204456	Background
T2_AGATCTGGTAATTGGA	-0.0976923	Background
T2_AGATCTGGTATCTGCA	0.113546	Background
T2_AGATCTGTCGATGAGG	-0.163411	Background
T2_AGATTGCAGGGAACGG	-0.0543776	Background
T2_AGATTGCCACTGAAGG	0.354662	High-Risk
T2_AGATTGCCAGCTGCAC	0.111185	Background
T2_AGATTGCGTCATACTG	0.247706	High-Risk
T2_AGCAGCCAGTACGTTC	0.269165	High-Risk
T2_AGCAGCCGTCCGAAGA	-0.283583	Background
T2_AGCATACAGATCCGAG	-0.290229	Background
T2_AGCATACAGCTGTTCA	-0.291847	Background
T2_AGCATACCAGGCAGTA	0.281045	High-Risk
T2_AGCATACCATTAACCG	-0.526296	Background
T2_AGCATACGTCGCTTTC	0.0930844	Background
T2_AGCATACGTGCACGAA	-0.273266	Background
T2_AGCATACGTTAGATGA	0.155097	Background
T2_AGCATACGTTATCACG	-0.418739	Background
T2_AGCATACTCTGGTTCC	-0.223548	Background
T2_AGCCTAAAGCTGAAAT	-0.319192	Background
T2_AGCCTAACACAGCGTC	0.190371	Background
T2_AGCCTAACAGCCACCA	-0.335375	Background
T2_AGCCTAACAGCTTAAC	0.210925	Background
T2_AGCCTAAGTACTTCTT	-0.320591	Background
T2_AGCGGTCCACAACGCC	-0.534111	Background
T2_AGCGGTCTCACCCGAG	-0.0136252	Background
T2_AGCGGTCTCCGTACAA	-0.307472	Background
T2_AGCGGTCTCCTAGTGA	0.258882	High-Risk
T2_AGCGGTCTCTCGATGA	-0.00354451	Background
T2_AGCGTATAGCTAGTCT	-0.060132	Background
T2_AGCGTATCAAGAGGCT	-0.318176	Background
T2_AGCGTATCATTCCTGC	-0.246443	Background
T2_AGCGTATGTATGAAAC	-0.162204	Background
T2_AGCGTATGTCGTCTTC	-0.525234	Background
T2_AGCGTATGTCTAGCGC	-0.214577	Background
T2_AGCGTCGAGATGAGAG	-0.349801	Background
T2_AGCGTCGAGCCAGAAC	-0.172118	Background
T2_AGCGTCGAGTGAACGC	-0.144639	Background
T2_AGCGTCGTCACGAAGG	0.256585	High-Risk
T2_AGCGTCGTCCAGGGCT	-0.129694	Background
T2_AGCGTCGTCTACTATC	-0.144571	Background
T2_AGCTCCTAGAGTTGGC	-0.48378	Background
T2_AGCTCCTGTTATGCGT	-0.0358286	Background
T2_AGCTCCTGTTGCTCCT	-0.0669528	Background
T2_AGCTCCTGTTGGTGGA	-0.334346	Background
T2_AGCTCCTTCTGACCTC	0.347485	High-Risk
T2_AGCTCTCAGCCAGTAG	-0.218796	Background
T2_AGCTCTCAGGGTGTGT	0.107525	Background
T2_AGCTCTCGTAAGGATT	-0.116076	Background
T2_AGCTCTCGTCTCATCC	-0.241759	Background
T2_AGCTCTCTCACTTACT	0.187571	Background
T2_AGCTCTCTCCACGAAT	0.123795	Background
T2_AGCTCTCTCTGCTGCT	-0.229547	Background
T2_AGCTTGAAGGCAATTA	-0.0648007	Background
T2_AGCTTGACAATACGCT	-0.363979	Background
T2_AGCTTGACATGAAGTA	-0.0184057	Background
T2_AGCTTGAGTGGAAAGA	0.493158	High-Risk
T2_AGCTTGATCCGAGCCA	-0.140511	Background
T2_AGGCCACAGCCGGTAA	-0.0841473	Background
T2_AGGCCACAGTAATCCC	0.0667448	Background
T2_AGGCCACCACGGTTTA	-0.49613	Background
T2_AGGCCACCACTCTGTC	-0.264495	Background
T2_AGGCCACGTAAGGGAA	-0.0984338	Background
T2_AGGCCACGTCCGTTAA	0.181236	Background
T2_AGGCCACTCATCTGTT	-0.0976698	Background
T2_AGGCCACTCGTAGGAG	0.190261	Background
T2_AGGCCGTTCGGACAAG	-0.266406	Background
T2_AGGCCGTTCTCGCTTG	-0.10791	Background
T2_AGGGAGTAGGCTCAGA	0.293053	High-Risk
T2_AGGGAGTAGTCCGGTC	-0.348977	Background
T2_AGGGAGTGTGGCCCTA	-0.336931	Background
T2_AGGGAGTTCTATCCTA	0.137469	Background
T2_AGGGAGTTCTCGGACG	-0.522834	Background
T2_AGGGATGCAAGCTGTT	-0.208916	Background
T2_AGGGATGCAGTATCTG	-0.274366	Background
T2_AGGGATGGTACAGACG	-0.269614	Background
T2_AGGGATGGTAGCCTCG	-0.370989	Background
T2_AGGGATGGTCATTAGC	-0.256043	Background
T2_AGGGATGTCCAAATGC	-0.375657	Background
T2_AGGGTGAAGCTACCGC	-0.311718	Background
T2_AGGGTGACACCCTATC	-0.0164193	Background
T2_AGGGTGACACTCTGTC	-0.180105	Background
T2_AGGGTGACATCTATGG	0.0915913	Background
T2_AGGGTGAGTCTAGCCG	0.0370902	Background
T2_AGGGTGAGTCTAGCGC	-0.365532	Background
T2_AGGGTGATCCAGTATG	0.120877	Background
T2_AGGTCATAGAATTCCC	-0.33689	Background
T2_AGGTCATCACCGATAT	-0.290934	Background
T2_AGGTCATCAGTTTACG	0.123191	Background
T2_AGGTCATGTACCCAAT	-0.0698208	Background
T2_AGGTCATGTCCTCCAT	-0.00294314	Background
T2_AGGTCATGTGTTTGTG	-0.261491	Background
T2_AGGTCATTCCTTGGTC	-0.391021	Background
T2_AGGTCATTCTTGAGAC	-0.110664	Background
T2_AGGTCATTCTTTACGT	0.177487	Background
T2_AGGTCCGAGCATGGCA	-0.438537	Background
T2_AGGTCCGAGTGGGATC	0.34227	High-Risk
T2_AGGTCCGCAAGAAGAG	0.212393	Background
T2_AGGTCCGCAGCGATCC	-0.330643	Background
T2_AGGTCCGCAGGTTTCA	-0.547545	Background
T2_AGGTCCGGTCGGCATC	0.098834	Background
T2_AGGTCCGGTGCAACGA	0.290269	High-Risk
T2_AGGTCCGGTGCTGTAT	-0.407232	Background
T2_AGGTCCGGTTGAACTC	-0.128891	Background
T2_AGGTCCGTCACTCTTA	-0.509192	Background
T2_AGTAGTCAGGCAGGTT	-0.324594	Background
T2_AGTAGTCGTCTACCTC	-0.293337	Background
T2_AGTAGTCTCAAACCAC	-0.0249511	Background
T2_AGTAGTCTCTATCCCG	0.246849	High-Risk
T2_AGTAGTCTCTCGCTTG	-0.104516	Background
T2_AGTCTTTCACCTCGGA	-0.00292764	Background
T2_AGTCTTTCAGTTCCCT	-0.420779	Background
T2_AGTCTTTTCTCTGAGA	0.0329472	Background
T2_AGTGAGGAGGGTGTGT	0.221663	High-Risk
T2_AGTGAGGAGGTGTTAA	0.143374	Background
T2_AGTGAGGCACCACGTG	-0.140167	Background
T2_AGTGAGGGTATAGGTA	0.0956069	Background
T2_AGTGAGGGTTATCACG	-0.379829	Background
T2_AGTGAGGTCGAATCCA	-0.134125	Background
T2_AGTGGGAAGAGTGAGA	-0.302905	Background
T2_AGTGGGAAGCAACGGT	0.0149623	Background
T2_AGTGGGAAGCAGCGTA	0.0115687	Background
T2_AGTGGGAAGGCAAAGA	-0.161796	Background
T2_AGTGGGACACAACGTT	-0.331972	Background
T2_AGTGGGACACGAAAGC	-0.551262	Background
T2_AGTGGGACACGGCGTT	-0.489812	Background
T2_AGTGGGACAGAGCCAA	-0.239865	Background
T2_AGTGGGACAGCTATTG	-0.404569	Background
T2_AGTGGGATCCTCCTAG	-0.21283	Background
T2_AGTGTCAAGGAATCGC	-0.0783261	Background
T2_AGTGTCAAGGACGAAA	-0.415763	Background
T2_AGTGTCAGTGATGTCT	-0.301554	Background
T2_AGTGTCATCCAGAGGA	-0.287417	Background
T2_AGTGTCATCGAGCCCA	-0.381657	Background
T2_AGTTGGTAGAAGATTC	0.434159	High-Risk
T2_AGTTGGTCACAAGACG	-0.400942	Background
T2_AGTTGGTCATCCTTGC	-0.117701	Background
T2_AGTTGGTGTCCCGACA	-0.275536	Background
T2_AGTTGGTGTGCCTTGG	-0.200318	Background
T2_AGTTGGTTCGGAATCT	0.340869	High-Risk
T2_AGTTGGTTCGGACAAG	-0.487078	Background
T2_AGTTGGTTCTATCCCG	0.0375503	Background
T2_ATAACGCAGAATGTGT	0.0377641	Background
T2_ATAACGCAGCGTAGTG	-0.407334	Background
T2_ATAACGCAGCTCAACT	-0.0748378	Background
T2_ATAACGCGTAGCAAAT	-0.337007	Background
T2_ATAACGCTCGCAAGCC	-0.258277	Background
T2_ATAAGAGAGTTGTCGT	0.535179	High-Risk
T2_ATAAGAGCATCTATGG	-0.0109654	Background
T2_ATAAGAGGTCCAGTTA	-0.241638	Background
T2_ATAAGAGGTCCGTTAA	0.198723	Background
T2_ATAAGAGGTGAAATCA	0.174754	Background
T2_ATAGACCAGCCACTAT	-0.059564	Background
T2_ATAGACCAGGGCTTCC	-0.382509	Background
T2_ATAGACCTCAACGAAA	-0.386632	Background
T2_ATCACGAAGAAGGGTA	-0.490124	Background
T2_ATCACGACAGCGAACA	-0.324404	Background
T2_ATCACGACAGGCGATA	-0.126958	Background
T2_ATCACGAGTGCAGTAG	-0.143718	Background
T2_ATCACGAGTTCAGTAC	-0.294088	Background
T2_ATCACGAGTTCATGGT	-0.177267	Background
T2_ATCACGATCTACCAGA	0.118539	Background
T2_ATCACGATCTTGTACT	0.182836	Background
T2_ATCATCTAGTACCGGA	-0.320159	Background
T2_ATCATCTAGTAGCCGA	0.0935681	Background
T2_ATCATCTCACTTAACG	-0.352977	Background
T2_ATCATCTGTCACCTAA	-0.184656	Background
T2_ATCATCTTCTTCGAGA	0.110106	Background
T2_ATCATGGAGACAGGCT	-0.272956	Background
T2_ATCATGGAGTGGACGT	-0.283345	Background
T2_ATCATGGCACGAAAGC	-0.373954	Background
T2_ATCATGGGTCATGCCG	0.130073	Background
T2_ATCATGGTCACTGGGC	-0.266524	Background
T2_ATCATGGTCTCTGCTG	-0.0210594	Background
T2_ATCCACCGTCCCTTGT	-0.436624	Background
T2_ATCCACCGTCGCCATG	-0.0932066	Background
T2_ATCCACCTCTTGACGA	-0.417771	Background
T2_ATCCGAAAGGCTCATT	-0.382515	Background
T2_ATCCGAACATGTCTCC	-0.140956	Background
T2_ATCCGAAGTTGGTAAA	-0.242322	Background
T2_ATCCGAATCACAAACC	-0.342621	Background
T2_ATCCGAATCATTTGGG	-0.249588	Background
T2_ATCCGAATCGCAGGCT	-0.0144887	Background
T2_ATCGAGTAGAACAATC	-0.309575	Background
T2_ATCGAGTGTGGCGAAT	-0.160274	Background
T2_ATCGAGTTCAGTTAGC	-0.251574	Background
T2_ATCGAGTTCGCTGATA	-0.350361	Background
T2_ATCTACTAGAATCTCC	-0.305419	Background
T2_ATCTACTAGACAGACC	-0.225873	Background
T2_ATCTACTAGGTGCACA	-0.498615	Background
T2_ATCTACTCACGTCTCT	-0.15471	Background
T2_ATCTACTCACGTGAGA	0.182385	Background
T2_ATCTACTCAGCAGTTT	-0.343793	Background
T2_ATCTACTTCGTTTGCC	-0.273584	Background
T2_ATCTACTTCTTGCATT	-0.126325	Background
T2_ATCTGCCAGGACAGCT	-0.302165	Background
T2_ATCTGCCAGGCGATAC	-0.229622	Background
T2_ATCTGCCAGGTGCTAG	-0.268682	Background
T2_ATCTGCCAGTATCGAA	0.546231	High-Risk
T2_ATCTGCCAGTCAATAG	-0.257406	Background
T2_ATCTGCCTCCACGCAG	-0.107931	Background
T2_ATCTGCCTCGACGGAA	-0.504538	Background
T2_ATGAGGGCACTATCTT	-0.436411	Background
T2_ATGAGGGCATAGTAAG	-0.374933	Background
T2_ATGAGGGTCTGTACGA	0.202867	Background
T2_ATGAGGGTCTTCTGGC	0.153445	Background
T2_ATGCGATAGGATATAC	-0.223972	Background
T2_ATGCGATGTACCGAGA	-0.441387	Background
T2_ATGCGATGTCCTCCAT	-0.222173	Background
T2_ATGCGATGTCTTCTCG	-0.11333	Background
T2_ATGCGATGTGTGCCTG	0.270086	High-Risk
T2_ATGCGATGTTACGTCA	-0.340287	Background
T2_ATGCGATTCGGATGTT	-0.339952	Background
T2_ATGGGAGAGGACGAAA	-0.343288	Background
T2_ATGGGAGCATCACGAT	-0.294492	Background
T2_ATGGGAGGTCTCTTAT	-0.379797	Background
T2_ATGGGAGTCCCAACGG	-0.208805	Background
T2_ATGTGTGCACAAGCCC	-0.271248	Background
T2_ATGTGTGCAGCCACCA	-0.39649	Background
T2_ATGTGTGGTAAGTGTA	-0.364857	Background
T2_ATGTGTGGTTATGTGC	0.348774	High-Risk
T2_ATGTGTGTCCCTCAGT	-0.225417	Background
T2_ATTACTCAGGCAAAGA	-0.00587551	Background
T2_ATTACTCCAACACGCC	0.124773	Background
T2_ATTACTCCACGTGAGA	0.190405	Background
T2_ATTACTCGTATAGGGC	-0.524516	Background
T2_ATTACTCGTCTCATCC	-0.276495	Background
T2_ATTACTCTCAACCAAC	0.0201947	Background
T2_ATTACTCTCGCTAGCG	-0.54013	Background
T2_ATTATCCAGATCGATA	0.029746	Background
T2_ATTATCCCAGATAATG	-0.297093	Background
T2_ATTATCCCATGCATGT	0.406894	High-Risk
T2_ATTATCCGTAAGGGCT	-0.246648	Background
T2_ATTATCCGTATCACCA	-0.173101	Background
T2_ATTATCCGTCTGCAAT	0.322778	High-Risk
T2_ATTATCCGTTGGGACA	-0.365149	Background
T2_ATTATCCTCTTAACCT	-0.319019	Background
T2_ATTCTACAGCTTATCG	-0.268755	Background
T2_ATTCTACAGGCCCTCA	-0.203073	Background
T2_ATTCTACAGTAATCCC	-0.0263327	Background
T2_ATTCTACTCAATCTCT	-0.301436	Background
T2_ATTCTACTCCCAACGG	-0.252711	Background
T2_ATTCTACTCCTATGTT	0.169372	Background
T2_ATTGGACAGGCCCTTG	-0.0280711	Background
T2_ATTGGACCAAGGTTTC	-0.201335	Background
T2_ATTGGACCATTCTTAC	-0.110549	Background
T2_ATTGGTGCAGACAGGT	-0.308511	Background
T2_ATTGGTGCATGCTAGT	-0.241343	Background
T2_ATTTCTGAGACAGACC	-0.293088	Background
T2_ATTTCTGCATCCGGGT	0.0311063	Background
T2_ATTTCTGGTGTGGCTC	-0.158593	Background
T2_ATTTCTGTCACAGGCC	-0.318781	Background
T2_ATTTCTGTCGAATGGG	-0.196332	Background
T2_ATTTCTGTCGCCTGTT	0.106571	Background
T2_CAACCAAAGATGCCAG	0.0756294	Background
T2_CAACCAACATCCTTGC	0.121013	Background
T2_CAACCAAGTCTAGCGC	-0.240601	Background
T2_CAACCAAGTTGAACTC	-0.457684	Background
T2_CAACCAATCAACACCA	-0.222389	Background
T2_CAACCAATCCGCAGTG	-0.264345	Background
T2_CAACCTCAGCACCGTC	-0.0713454	Background
T2_CAACCTCAGGTACTCT	-0.205468	Background
T2_CAACCTCAGTCCTCCT	0.221565	High-Risk
T2_CAACCTCAGTCGTTTG	0.212355	Background
T2_CAACCTCCAATGCCAT	-0.230639	Background
T2_CAACCTCGTTATTCTC	-0.260301	Background
T2_CAACTAGAGACGACGT	-0.292715	Background
T2_CAACTAGCAAAGGCGT	-0.0165406	Background
T2_CAACTAGCAAGTTGTC	0.408707	High-Risk
T2_CAACTAGCAGACAAGC	-0.246281	Background
T2_CAACTAGCAGAGTGTG	-0.681207	Background
T2_CAACTAGCATACCATG	-0.319539	Background
T2_CAACTAGCATTACGAC	-0.402119	Background
T2_CAACTAGTCAGTCCCT	-0.262506	Background
T2_CAAGAAAAGGAATGGA	-0.515738	Background
T2_CAAGAAAAGGGATCTG	-0.202005	Background
T2_CAAGAAAAGTATTGGA	-0.259213	Background
T2_CAAGAAACAGTATGCT	-0.107576	Background
T2_CAAGAAAGTACTCGCG	0.0418431	Background
T2_CAAGATCAGCTCCTTC	-0.131812	Background
T2_CAAGATCGTTGCTCCT	-0.207688	Background
T2_CAAGATCTCCAAGCCG	-0.0144557	Background
T2_CAAGATCTCCGGCACA	-0.28267	Background
T2_CAAGGCCAGATCGGGT	-0.165362	Background
T2_CAAGGCCAGTTGTCGT	-0.0253955	Background
T2_CAAGGCCTCGGCTACG	-0.159365	Background
T2_CAAGTTGAGACGCACA	-0.221933	Background
T2_CAAGTTGCAAGCCTAT	-0.485746	Background
T2_CAAGTTGCATAGACTC	-0.264639	Background
T2_CAAGTTGGTACCAGTT	0.259854	High-Risk
T2_CAAGTTGTCCAGAAGG	-0.306805	Background
T2_CACAAACAGACCGGAT	-0.146983	Background
T2_CACAAACCAAGCGTAG	-0.0546899	Background
T2_CACAAACTCAATCACG	-0.276123	Background
T2_CACAAACTCAGCAACT	0.0998719	Background
T2_CACACAACAGTAAGAT	0.208508	Background
T2_CACACAAGTCACAAGG	-0.206962	Background
T2_CACACAAGTCCAGTTA	-0.31174	Background
T2_CACACAATCAGTGTTG	0.00335009	Background
T2_CACACAATCATCGATG	-0.38544	Background
T2_CACACAATCGAATCCA	-0.299434	Background
T2_CACACCTAGACAATAC	-0.134435	Background
T2_CACACCTCAGCCACCA	-0.197267	Background
T2_CACACCTTCAACGCTA	-0.344635	Background
T2_CACACCTTCTGATTCT	0.0570804	Background
T2_CACACTCAGCCACGTC	0.00958642	Background
T2_CACACTCAGCGATCCC	-0.0657822	Background
T2_CACACTCCAGTATGCT	-0.11302	Background
T2_CACACTCCATGGGACA	-0.128063	Background
T2_CACACTCCATGTAAGA	-0.160391	Background
T2_CACACTCGTATGAATG	-0.0224666	Background
T2_CACACTCGTTCTGAAC	-0.0996903	Background
T2_CACACTCTCACCACCT	-0.143165	Background
T2_CACACTCTCGCGCCAA	-0.350591	Background
T2_CACACTCTCGTACCGG	0.132896	Background
T2_CACACTCTCTCGCTTG	-0.227486	Background
T2_CACACTCTCTTATCTG	-0.0522799	Background
T2_CACAGGCGTTGGAGGT	-0.004135	Background
T2_CACAGGCTCCAAGTAC	-0.191611	Background
T2_CACAGGCTCCCAGGTG	-0.549525	Background
T2_CACAGGCTCCTCTAGC	0.281561	High-Risk
T2_CACAGTAAGTTTCCTT	-0.239003	Background
T2_CACAGTACATGCCACG	-0.306229	Background
T2_CACAGTAGTACTTGAC	-0.407153	Background
T2_CACATAGAGAAACCAT	-0.352793	Background
T2_CACATAGAGCAGACTG	0.0255109	Background
T2_CACATAGCAAGTTGTC	-0.24098	Background
T2_CACATAGCACTACAGT	-0.0111311	Background
T2_CACATAGCAGTCAGAG	0.0463355	Background
T2_CACATAGGTCAACTGT	0.117351	Background
T2_CACATAGGTCTGCAAT	-0.1039	Background
T2_CACATAGTCAACCAAC	-0.211609	Background
T2_CACATAGTCAATAAGG	-0.233	Background
T2_CACATAGTCTGATTCT	0.0200531	Background
T2_CACATTTAGAGTAAGG	-0.342376	Background
T2_CACATTTAGCCGTCGT	-0.221689	Background
T2_CACATTTCAAACGTGG	-0.149024	Background
T2_CACATTTCACCACCAG	-0.0414349	Background
T2_CACATTTCACCGATAT	-0.0237458	Background
T2_CACATTTCACGCGAAA	-0.477452	Background
T2_CACATTTCATCGGACC	-0.425027	Background
T2_CACATTTTCTACGAGT	-0.232709	Background
T2_CACATTTTCTGACCTC	0.134169	Background
T2_CACCACTAGGATCGCA	-0.327828	Background
T2_CACCACTAGTCAATAG	-0.164604	Background
T2_CACCACTAGTCCATAC	-0.0418422	Background
T2_CACCACTCAGTCGTGC	-0.242055	Background
T2_CACCACTCATAGGATA	-0.215168	Background
T2_CACCACTCATCGGACC	-0.520975	Background
T2_CACCACTCATGACGGA	-0.384943	Background
T2_CACCACTGTCCAACTA	-0.191134	Background
T2_CACCACTGTTTAGGAA	-0.258816	Background
T2_CACCAGGCACGGTTTA	-0.236132	Background
T2_CACCAGGCATCTATGG	-0.0631447	Background
T2_CACCAGGCATCTCCCA	-0.386292	Background
T2_CACCAGGGTCGACTGC	0.304381	High-Risk
T2_CACCAGGTCTCAAACG	-0.00913465	Background
T2_CACCTTGAGTGTTAGA	-0.562866	Background
T2_CACCTTGCACAAGCCC	-0.283636	Background
T2_CACCTTGCATCACCCT	-0.373286	Background
T2_CACCTTGGTAAACCTC	-0.245357	Background
T2_CACCTTGTCACGACTA	-0.319188	Background
T2_CACCTTGTCCCATTTA	-0.329589	Background
T2_CACCTTGTCGATGAGG	-0.397119	Background
T2_CACTCCACAACAACCT	-0.493879	Background
T2_CACTCCACAGGAATCG	-0.118816	Background
T2_CACTCCACAGTCAGCC	0.302575	High-Risk
T2_CACTCCAGTAGCCTAT	-0.33634	Background
T2_CACTCCAGTCCTGCTT	-0.33147	Background
T2_CACTCCAGTGTAAGTA	-0.236154	Background
T2_CAGAATCAGTCTCAAC	-0.214529	Background
T2_CAGAATCAGTGCCAGA	0.0199575	Background
T2_CAGAGAGAGACTGGGT	-0.403202	Background
T2_CAGAGAGCAACCGCCA	0.187389	Background
T2_CAGAGAGCAGACACTT	-0.363295	Background
T2_CAGAGAGCAGACGCTC	-0.134143	Background
T2_CAGAGAGTCATTCACT	0.0532432	Background
T2_CAGATCAAGAATAGGG	-0.170225	Background
T2_CAGATCAAGATCCGAG	-0.120523	Background
T2_CAGATCAAGATCTGAA	-0.451611	Background
T2_CAGATCACATTCCTGC	-0.233705	Background
T2_CAGATCAGTCCATGAT	-0.0242391	Background
T2_CAGATCAGTCGACTGC	-0.230462	Background
T2_CAGCAGCAGCCCTAAT	0.328835	High-Risk
T2_CAGCAGCCACGAAATA	-0.238582	Background
T2_CAGCAGCTCCTCTAGC	0.372768	High-Risk
T2_CAGCAGCTCTCGCTTG	-0.384209	Background
T2_CAGCATAAGATCCTGT	-0.257408	Background
T2_CAGCATAAGCCTCGTG	-0.721627	Background
T2_CAGCATAGTGAAATCA	-0.334239	Background
T2_CAGCCGAAGAGTCGGT	0.0680636	Background
T2_CAGCCGACAGCTCCGA	-0.302134	Background
T2_CAGCCGACATATACCG	0.137743	Background
T2_CAGCCGATCGTAGGAG	-0.395308	Background
T2_CAGCCGATCTCAACTT	-0.00680926	Background
T2_CAGCGACAGCTGGAAC	0.378434	High-Risk
T2_CAGCGACTCCATGCTC	0.162251	Background
T2_CAGCGACTCGTCTGAA	0.0134162	Background
T2_CAGCTAAAGTTACGGG	-0.39339	Background
T2_CAGCTAAAGTTTAGGA	-0.20294	Background
T2_CAGCTAACAAGTAATG	-0.212595	Background
T2_CAGCTAACACCAGGCT	-0.449268	Background
T2_CAGCTAACACGTTGGC	-0.144822	Background
T2_CAGCTAACAGCGTAAG	0.157782	Background
T2_CAGCTAATCAACACAC	0.354085	High-Risk
T2_CAGCTAATCCAGAAGG	-0.230974	Background
T2_CAGCTAATCGCAGGCT	-0.0761512	Background
T2_CAGCTAATCTTGTACT	-0.355997	Background
T2_CAGCTGGCATATGGTC	-0.205016	Background
T2_CAGCTGGGTTCACGGC	-0.38434	Background
T2_CAGCTGGTCCAAAGTC	-0.351805	Background
T2_CAGCTGGTCTGCAAGT	0.0419156	Background
T2_CAGGTGCAGCTAGTCT	-0.298478	Background
T2_CAGGTGCAGGAGCGAG	-0.329668	Background
T2_CAGGTGCAGTTCCACA	-0.0382377	Background
T2_CAGGTGCCACATAACC	-0.112871	Background
T2_CAGGTGCCACATTAGC	-0.311944	Background
T2_CAGGTGCCACCGGAAA	-0.286841	Background
T2_CAGGTGCCACGTCTCT	0.0477197	Background
T2_CAGGTGCTCGAATGCT	-0.350832	Background
T2_CAGTAACAGTGCGTGA	-0.344506	Background
T2_CAGTAACAGTGCTGCC	0.0308217	Background
T2_CAGTAACAGTTATCGC	0.0750115	Background
T2_CAGTAACCACGGTAGA	-0.543741	Background
T2_CAGTAACCAGATGAGC	-0.573758	Background
T2_CAGTAACCATGGTCAT	-0.341512	Background
T2_CAGTAACGTTCCACTC	-0.15576	Background
T2_CAGTAACTCAGGTAAA	0.271631	High-Risk
T2_CAGTCCTGTGCCTGGT	-0.120986	Background
T2_CAGTCCTGTTGACGTT	-0.0893676	Background
T2_CAGTCCTTCAACACGT	-0.123807	Background
[truncated: 39,988 more rows]

## Sheet: 2.Differential expression genes
names	logfoldchanges	pvals	pvals_adj
KRT18	2.49585	0	0
KRT8	2.42873	0	0
ANXA4	2.12872	0	0
LGALS4	2.68947	0	0
EPCAM	2.4265	0	0
TSPAN8	2.39654	0	0
C12orf75	2.13318	0	0
ELF3	2.15542	0	0
ATP1B1	2.08117	6.1253e-303	1.40542e-300
AGR2	2.51089	1.53651e-298	3.1729e-296
STARD10	2.14067	9.13835e-291	1.71552e-288
SOX9	2.27703	3.70629e-284	6.3779e-282
FXYD3	2.12985	5.10969e-268	8.11655e-266
GPX2	2.22776	4.14954e-267	6.12057e-265
CTSE	2.28723	4.88134e-253	6.71998e-251
LSR	1.96414	1.10112e-251	1.42113e-249
C19orf33	2.12101	1.15241e-231	1.39984e-229
PPP1R1B	2.4241	1.00299e-219	1.15065e-217
PRSS3	2.16501	8.10692e-217	8.81094e-215
MAL2	1.85577	2.59191e-215	2.67615e-213
S100P	2.1045	1.39574e-213	1.37248e-211
CLDN4	1.76427	3.79322e-206	3.56045e-204
DMKN	1.93645	3.17698e-205	2.85237e-203
S100A14	1.93409	9.17258e-199	7.89224e-197
TFF3	2.18826	6.86506e-197	5.67054e-195
TFF1	2.17891	5.36942e-195	4.26456e-193
CA2	2.18427	2.24009e-192	1.71326e-190
CLDN18	2.33971	4.11401e-191	3.03408e-189
KLF5	1.8437	2.20861e-188	1.57268e-186
DEFB1	1.83193	3.77549e-188	2.59879e-186
TACSTD2	1.66084	3.07568e-187	2.0488e-185
SDC4	1.61821	6.29846e-184	4.06447e-182
CYP3A5	1.7488	2.2599e-181	1.41415e-179
TFF2	2.2076	2.62779e-178	1.59599e-176
AGR3	2.02272	1.12874e-177	6.65958e-176
KRT7	1.58463	1.28995e-177	7.39931e-176
GATM	1.74029	6.77162e-174	3.67984e-172
FAM3B	1.97837	1.25657e-170	6.48705e-169
NQO1	1.68795	1.0541e-169	5.30908e-168
SLC12A2	1.76848	1.06285e-165	5.22568e-164
MUC1	1.53765	2.86121e-163	1.37404e-161
TMC5	1.75394	3.81904e-163	1.79234e-161
LIPH	1.78839	5.57701e-163	2.55923e-161
PIGR	1.63977	5.241e-160	2.35275e-158
SH3YL1	1.50204	7.4e-159	3.25128e-157
MT1G	1.97935	1.14497e-155	4.92574e-154
HSD17B2	1.9306	1.17876e-155	4.96761e-154
SFN	1.77353	4.05699e-155	1.67554e-153
MT1E	1.35742	1.23874e-152	5.0157e-151
MT1F	1.61154	1.2683e-151	5.03663e-150
SHROOM3	1.76801	2.45997e-147	9.40712e-146
VSIG2	1.85922	1.09012e-141	4.0929e-140
SLPI	1.42893	4.68465e-135	1.72746e-133
CCND1	1.40669	6.15192e-134	2.22872e-132
WFDC2	1.37293	2.13405e-131	7.59796e-130
ANXA10	2.06356	3.05371e-129	1.05098e-127
TM4SF1	1.19935	7.82055e-126	2.64745e-124
CLDN10	1.56189	1.03501e-124	3.44725e-123
LYZ	1.42985	9.53333e-123	3.12481e-121
TRIM54	2.00159	2.91357e-122	9.40081e-121
CEACAM6	1.59572	1.07146e-120	3.40395e-119
ONECUT2	1.67445	5.08395e-120	1.59066e-118
JUP	1.31782	6.96187e-120	2.14571e-118
SLC4A4	1.7425	8.2632e-120	2.50934e-118
TSPAN1	1.49588	2.8961e-118	8.66733e-117
SULT1C2	2.02515	2.21386e-117	6.5309e-116
LMO7	1.26568	1.05501e-115	3.06845e-114
AKR7A3	1.91639	4.32546e-115	1.24057e-113
MMP7	1.41261	4.49144e-112	1.25335e-110
PDE4C	1.98021	1.5867e-111	4.36871e-110
SLC40A1	1.29386	2.24743e-111	6.10651e-110
ALDH1A1	1.31584	6.5336e-110	1.75219e-108
AZGP1	1.75288	2.02379e-109	5.35785e-108
CAPN8	1.50779	2.67868e-109	7.00187e-108
TM4SF4	1.61572	3.43627e-109	8.86988e-108
MGST1	1.38528	3.20403e-108	8.16831e-107
REG4	2.14852	9.79964e-108	2.46784e-106
HMGA1	1.20761	2.58781e-102	6.3617e-101
UGT2A3	2.20475	3.32856e-102	8.08645e-101
CFTR	1.6431	2.73876e-99	6.57621e-98
TMPRSS4	1.50035	1.47978e-97	3.51235e-96
CLDN3	1.50036	1.92308e-97	4.51269e-96
PHGR1	1.96576	3.36686e-97	7.81187e-96
PLA2G10	1.88575	5.74614e-97	1.31842e-95
HIST1H4C	1.12111	6.25235e-96	1.4188e-94
AKR1B10	2.54708	3.60636e-95	8.09471e-94
GPRC5A	1.29409	1.13049e-93	2.51018e-92
ARL14	1.86709	4.15331e-93	9.12402e-92
RASSF6	1.78046	1.5889e-92	3.45378e-91
ENC1	1.55865	7.19192e-92	1.54701e-90
TM4SF5	1.88231	2.59431e-91	5.46658e-90
EHF	1.55562	6.32854e-90	1.32004e-88
LINC01133	1.54844	1.08812e-88	2.24698e-87
PDZK1IP1	1.09338	3.23441e-88	6.61294e-87
SDC1	1.1309	1.11313e-87	2.25354e-86
MIA	1.87226	1.62033e-87	3.24852e-86
CKB	1.1754	6.08452e-87	1.20813e-85
KIF12	1.42415	4.72229e-86	9.19956e-85
CES2	1.49981	1.02167e-85	1.95347e-84
LDLR	1.32842	6.94417e-84	1.31557e-82
AMN	1.54738	1.50977e-82	2.83425e-81
AKR1C3	1.19217	1.88927e-79	3.51472e-78
OLFM4	1.22596	9.53835e-79	1.74307e-77
HPGD	1.73099	1.46936e-78	2.6616e-77
PLAC8	1.2554	1.80337e-78	3.23822e-77
GCNT3	1.38919	9.44398e-78	1.68119e-76
TRNP1	1.57744	1.04005e-76	1.83564e-75
HIST1H1C	1.11677	1.56364e-75	2.73637e-74
SQLE	1.49202	1.91264e-75	3.319e-74
GMNN	1.46526	2.72649e-75	4.69183e-74
KCNE3	1.89829	2.26012e-74	3.85715e-73
TMEM45B	1.69051	3.77016e-71	6.2283e-70
SCD	1.40992	8.82439e-71	1.44622e-69
MECOM	1.32949	1.18441e-70	1.92583e-69
PROM1	1.38838	2.64603e-69	4.26879e-68
MACC1	1.3789	9.69358e-69	1.55172e-67
SORBS2	1.08753	1.81768e-67	2.86528e-66
SLC38A1	1.10075	1.93231e-67	3.02289e-66
SLC3A1	1.51081	1.95073e-67	3.02876e-66
HMGCS1	1.33015	2.43358e-66	3.69511e-65
CITED4	1.34406	3.9455e-66	5.94705e-65
MUC5AC	1.63219	7.04118e-66	1.05363e-64
RAMP1	1.04011	1.89442e-65	2.79427e-64
AOC1	1.89022	4.28847e-64	6.14978e-63
ITGB8	1.25046	1.4134e-63	1.99908e-62
MUC13	1.19971	4.74249e-62	6.61706e-61
LGALS2	1.39927	7.22174e-62	9.94193e-61
SCTR	1.41278	8.34823e-61	1.13415e-59
BCAS1	1.51515	1.26176e-60	1.69191e-59
KLK1	1.66724	2.26826e-59	2.98342e-58
PRSS1	1.40183	2.72899e-59	3.54425e-58
SIPA1L3	1.24286	5.82809e-58	7.42902e-57
ZG16B	1.29831	1.98392e-57	2.49805e-56
MUC6	1.31229	9.65215e-57	1.2007e-55
SFTA2	1.04215	1.34174e-56	1.6591e-55
ANXA13	2.23342	1.52757e-56	1.87764e-55
ITGA2	1.06394	4.00008e-56	4.85893e-55
GDF15	1.42703	4.5946e-55	5.45278e-54
SLC37A4	1.25972	9.47012e-55	1.11747e-53
TMPRSS2	1.24463	1.69905e-54	1.98222e-53
GSTA1	1.79127	6.89633e-54	7.82468e-53
FXYD2	1.21259	2.73814e-52	3.05636e-51
UBD	1.50029	8.59262e-52	9.53966e-51
HOMER2	1.56803	1.18905e-51	1.31304e-50
GRB7	1.30856	1.97572e-51	2.15865e-50
LAMA3	1.06885	8.03613e-49	8.59825e-48
HMGB3	1.24785	5.84331e-48	6.18791e-47
NMU	2.32082	1.53884e-47	1.61304e-46
FGGY	1.34648	3.82593e-47	3.99017e-46
AQP5	1.54932	6.4386e-46	6.61478e-45
CDH17	2.02093	1.31345e-45	1.34271e-44
GP2	1.62112	1.41803e-45	1.44248e-44
DCDC2	1.92447	4.17398e-44	4.10442e-43
PRSS22	1.02392	6.43702e-44	6.29974e-43
FAM3D	1.59438	8.99104e-44	8.75778e-43
KLK11	1.27127	2.93676e-43	2.84714e-42
DUSP4	1.01348	3.29158e-43	3.17622e-42
SFRP5	1.55311	3.83449e-42	3.66584e-41
AKR1C1	1.46508	5.66895e-42	5.39465e-41
CCL15	2.04955	1.15267e-41	1.09187e-40
RHOV	1.38866	2.71181e-41	2.53389e-40
CLDN23	1.10881	4.59806e-40	4.14629e-39
UPK1B	1.62716	1.51034e-38	1.34434e-37
CXCL5	1.31397	2.96969e-38	2.57664e-37
MEST	1.0506	5.81918e-38	4.98615e-37
CDCA7	1.35718	1.40045e-37	1.19501e-36
SERPINB5	1.52844	6.27518e-37	5.28908e-36
BLNK	1.07484	9.36362e-37	7.86011e-36
ADRA2A	1.16216	2.89411e-36	2.40981e-35
HIST1H2BD	1.00037	4.95841e-35	4.04708e-34
CDHR5	1.44667	2.28329e-34	1.85629e-33
SERPINA5	1.26928	3.87979e-34	3.14187e-33
KIAA1324	2.13475	8.75139e-34	7.0045e-33
LEFTY1	1.47596	1.11634e-33	8.90056e-33
MS4A8	1.57156	1.28485e-33	1.02047e-32
SDR16C5	1.08162	6.66269e-33	5.23136e-32
CA9	1.24111	7.73889e-33	6.03049e-32
SPTSSB	1.71071	1.69158e-32	1.30828e-31
CTRB1	1.29364	1.76324e-32	1.35862e-31
PNLIP	1.56629	5.52437e-32	4.20953e-31
PTTG1	1.30419	8.46537e-32	6.42684e-31
SPINK5	1.80075	3.02565e-31	2.27199e-30
MACROD2	1.12169	1.0357e-30	7.61112e-30
TRIM31	1.28278	2.3413e-30	1.70239e-29
AKAP7	1.24152	1.11538e-29	7.96976e-29
ACOT7	1.07496	1.96985e-29	1.3883e-28
CPB1	1.28237	3.13817e-29	2.1893e-28
PLA2G1B	1.2674	4.93574e-28	3.37493e-27
COL17A1	1.02357	8.6546e-28	5.89827e-27
SERPINA4	1.20536	1.02588e-27	6.96856e-27
CTRC	1.17277	3.5829e-27	2.41787e-26
VSIG1	1.71784	3.87239e-26	2.52255e-25
LINC00261	1.8586	9.61604e-26	6.20535e-25
CENPW	1.23947	1.07102e-25	6.86849e-25
DPCR1	1.09307	2.23747e-25	1.41296e-24
MT1H	1.66607	4.34649e-25	2.71163e-24
SYCN	1.44022	8.022e-25	4.98958e-24
CLPS	1.26281	2.10169e-24	1.29166e-23
PROX1	1.69612	7.43149e-24	4.47406e-23
CELA3B	1.57446	3.76806e-23	2.22952e-22
PHGDH	1.09355	4.20633e-23	2.47467e-22
KCNJ15	1.03805	7.0825e-23	4.14316e-22
CELA3A	1.177	1.98597e-21	1.12665e-20
CENPF	1.72855	3.39317e-21	1.90924e-20
CPA1	1.20519	3.90838e-21	2.18721e-20
DMBT1	1.61811	6.65707e-21	3.70535e-20
ALDOB	1.52031	7.80765e-21	4.33408e-20
AMBP	1.06334	8.34683e-21	4.62097e-20
CPA2	1.29875	1.19353e-20	6.58994e-20
BEX1	1.22818	1.64849e-20	9.0777e-20
AMY2A	1.69445	3.23931e-19	1.71078e-18
HMGCS2	2.26204	4.78916e-18	2.39323e-17
SCD5	1.02206	6.89005e-18	3.39569e-17
PRAP1	1.61403	1.83122e-17	8.87669e-17
C11orf53	2.83428	3.34266e-17	1.59782e-16
PGC	1.40061	3.95902e-17	1.88808e-16
BIRC5	1.52925	6.23788e-17	2.95441e-16
MKI67	1.60073	7.02548e-17	3.31224e-16
CELA2A	1.88224	7.45832e-17	3.50033e-16
FOLR1	1.39148	1.04717e-16	4.85936e-16
ACY3	1.15845	1.67284e-16	7.65946e-16
TOP2A	1.51134	7.27882e-16	3.25341e-15
SPINK4	1.75244	1.00957e-15	4.47373e-15
CCNB1	1.60254	1.53632e-15	6.77884e-15
MUC17	1.65553	1.89935e-15	8.27461e-15
PNLIPRP1	1.37288	2.92135e-15	1.25679e-14
CCNB2	1.71414	1.42282e-14	5.94763e-14
CEL	1.36019	1.73368e-14	7.21782e-14
MAD2L1	1.05344	2.59819e-14	1.0752e-13
FABP1	1.77337	3.58029e-14	1.46984e-13
KCNJ16	1.26495	6.08762e-14	2.46973e-13
ZWINT	1.06788	7.51088e-14	3.02338e-13
CDC20	1.7584	1.42776e-13	5.68076e-13
CDKN3	1.27064	1.95094e-13	7.67368e-13
CLDN2	1.24795	4.26381e-13	1.65815e-12
SERPINA6	1.32329	4.28675e-13	1.66394e-12
LINC00671	1.69797	6.75952e-13	2.5945e-12
NUSAP1	1.22796	7.36293e-13	2.81564e-12
UBE2C	1.08532	7.44558e-13	2.84198e-12
PDIA2	1.81886	1.09186e-12	4.12946e-12
HES6	1.33144	1.84061e-12	6.87317e-12
PRC1	1.4012	3.10407e-12	1.13651e-11
UNC5B-AS1	1.0518	3.38963e-12	1.23886e-11
ANLN	1.93887	3.89256e-12	1.41766e-11
ERP27	1.04059	9.25729e-12	3.31305e-11
LY6K	1.55371	1.49937e-11	5.31993e-11
AMY2B	1.40643	1.51566e-11	5.36849e-11
CELA2B	2.41863	2.32124e-11	8.13812e-11
SCGB2A1	1.00436	3.83799e-11	1.33201e-10
TNNC2	1.07153	5.67519e-11	1.95974e-10
C6orf222	1.08307	6.18759e-11	2.12249e-10
VTN	1.36272	1.27306e-10	4.26764e-10
TPX2	1.48355	1.51776e-10	5.0633e-10
TM4SF20	1.19143	3.58057e-10	1.16256e-09
UGT2B7	1.24726	1.11505e-09	3.537e-09
CENPE	1.52066	1.28056e-09	4.04954e-09
SPIB	1.30863	1.65e-09	5.15469e-09
PCK1	1.93461	1.84337e-09	5.74141e-09
AVIL	1.56886	1.99589e-09	6.20709e-09
HEPACAM2	2.69829	4.70653e-09	1.42298e-08
S100A1	1.73999	6.63475e-09	1.98274e-08
SLC17A4	1.61597	1.1185e-08	3.28084e-08
CUZD1	1.47715	1.1366e-08	3.32918e-08
HMMR	1.75283	1.79684e-08	5.19675e-08
MMP3	1.43914	3.09564e-08	8.87846e-08
CTRL	2.44793	3.47165e-08	9.9293e-08
CDCA8	1.47539	7.03163e-08	1.96486e-07
ADH6	2.7794	7.25461e-08	2.02443e-07
DLGAP5	1.89095	1.10388e-07	3.03936e-07
NTS	1.16453	2.35787e-07	6.37303e-07
ASPM	1.53451	2.54532e-07	6.86174e-07
UGT2B15	1.44784	2.91545e-07	7.82889e-07
CDCA3	1.32597	3.66469e-07	9.78989e-07
RNF186	1.09154	3.91694e-07	1.04368e-06
FAM177B	1.11722	5.55696e-07	1.45994e-06
HIST1H2BJ	1.23631	8.36393e-07	2.15356e-06
CRYM	2.15573	1.27023e-06	3.2343e-06
TUBB2B	1.77257	1.36351e-06	3.46329e-06
NUF2	1.37168	1.70217e-06	4.28135e-06
SUCNR1	1.58411	3.52618e-06	8.6996e-06
SH2D6	2.64654	3.86947e-06	9.51244e-06
REG3G	1.03863	4.17138e-06	1.02303e-05
AKR1C2	1.01263	4.51842e-06	1.1029e-05
TNFRSF11B	1.06627	6.04222e-06	1.45932e-05
MSMB	1.15824	7.84868e-06	1.86938e-05
GTSE1	1.39939	1.39783e-05	3.25424e-05
PLK1	1.42454	1.68705e-05	3.90555e-05
AURKA	1.19475	1.88614e-05	4.36157e-05
MYBPC1	2.00129	2.07058e-05	4.77204e-05
REP15	1.74033	2.27707e-05	5.23041e-05
CENPA	1.55844	2.46278e-05	5.63194e-05
SERPINI2	2.0967	2.58832e-05	5.91247e-05
AQP8	2.18719	2.94883e-05	6.69893e-05
ACE2	1.15867	3.36386e-05	7.61662e-05
ITPKA	1.17708	5.46355e-05	0.000121445
RGS13	1.63733	5.47196e-05	0.000121501
FABP2	2.02468	5.90514e-05	0.000130558
NUAK2	1.0945	8.98971e-05	0.000195203
CCNA2	1.13587	9.04065e-05	0.000196102
LRRC26	1.20807	0.000124679	0.000265425
MME	1.50559	0.000144229	0.000305471
CALB2	1.15548	0.000197348	0.000412473
GSTA2	1.41695	0.000221959	0.000460649
GPA33	1.46273	0.000248705	0.000514089
POU2F3	1.71922	0.000296758	0.000607339
NCAM1	1.7867	0.000347098	0.000706165
APOBEC2	1.26222	0.000428562	0.000863395
BMX	2.08065	0.000429406	0.000864253
GUCY2C	1.52679	0.000455812	0.000914725
KRT20	1.73308	0.000546519	0.0010883
LIPG	1.41061	0.000789629	0.00154851
CPS1	1.27669	0.000836336	0.00163545
ARHGEF39	1.31143	0.00117102	0.00223696
EDN2	1.27785	0.00129447	0.0024614
PCDH20	2.20283	0.00148389	0.00279583
BPIFB1	1.79807	0.00214332	0.00397303
ITLN1	2.09099	0.00427569	0.00765768
LGALS7B	1.35952	0.00673538	0.0117471
CKAP2L	1.12493	0.0108508	0.0184418
FGL1	1.67765	0.0158807	0.026532
KIT	1.37413	0.0198819	0.0327662
RBP2	1.91436	0.0221166	0.0360463
SERPINB2	1.32699	0.0269706	0.0435792

## Sheet: 3.SIDISH marker genes
genes	score
ACOT7	1.91542
ERRFI1	1.91659
TNFRSF1B	1.91541
AKR7A3	1.91587
CDA	1.91521
HSPG2	1.91551
ID3	1.91562
STMN1	1.91904
CD52	1.9161
SFN	1.91867
IFI6	1.92394
GJA4	1.9155
CITED4	1.92099
TSPAN1	1.91913
TACSTD2	1.94039
IFI44L	1.91502
S1PR1	1.91516
AMY2B	1.91524
KIAA1324	1.91605
CTSS	1.91628
S100A9	1.9165
S100A14	1.92024
MUC1	1.91729
MNDA	1.91651
FCER1G	1.91785
FCGR2B	1.91525
RGS5	1.91605
ATP1B1	1.94706
RGS1	1.91505
CFH	1.91531
ELF3	1.94867
BTG2	1.91543
PRELP	1.91559
CTSE	1.93632
PIGR	1.91727
CD55	1.91797
CD34	1.91515
CENPF	1.91506
SH3YL1	1.91543
ID2	1.91749
SDC1	1.91508
TRIM54	1.91678
SLC3A1	1.91623
EPAS1	1.91806
EPCAM	1.93561
ANXA4	1.95353
REG1A	1.91589
ANKRD36C	1.91665
SULT1C2	1.91586
CXCR4	1.91545
FRZB	1.92158
CALCRL	1.915
COL3A1	1.91671
SLC40A1	1.91689
FN1	1.93965
IGFBP2	1.91529
IGFBP5	1.91503
SLC11A1	1.91497
COL6A3	1.9167
TMEM158	1.91528
WNT5A	1.915
TMEM45A	1.91564
MUC13	1.91568
SLCO2A1	1.915
CLDN18	1.91816
RBP1	1.9238
CPB1	1.91954
TM4SF1	1.91773
TM4SF4	1.91555
MME	1.91543
ARL14	1.91785
LIPH	1.91605
APOD	1.91735
S100P	1.92188
KDR	1.91541
NMU	1.91568
UGT2A3	1.91888
SLC4A4	1.92673
SHROOM3	1.91834
SCD5	1.9151
EMCN	1.91622
MAD2L1	1.91518
SPRY1	1.91711
SFRP2	1.91603
HMGB2	1.91932
SORBS2	1.91803
C7	1.91776
HMGCS1	1.91551
GZMK	1.91629
ENC1	1.92196
LOX	1.91499
SLC12A2	1.91676
TGFBI	1.9167
ECSCR	1.91592
GPX3	1.9201
SPARC	1.9195
PTTG1	1.91567
SOX4	1.91717
DCDC2	1.91728
GMNN	1.92915
HIST1H4C	1.92642
LTB	1.91725
LST1	1.9164
AIF1	1.91759
HSPA1A	1.91497
HLA-DRA	1.91997
HLA-DQA1	1.91535
HLA-DQA2	1.91505
HLA-DPA1	1.91763
HLA-DPB1	1.91949
HMGA1	1.91559
CITED2	1.91499
SMOC2	1.91814
THBS2	1.91547
THSD7A	1.91524
AGR2	1.93566
AGR3	1.92094
GPNMB	1.91822
CPVL	1.91519
SFRP4	1.91539
RAMP3	1.91625
CLDN3	1.91977
CLDN4	1.91977
CD36	1.91537
STEAP4	1.91574
GNG11	1.91718
COL1A2	1.91591
PDK4	1.91724
CYP3A5	1.9163
AZGP1	1.91813
PCOLCE	1.91531
CFTR	1.91739
AKR1B10	1.91669
CALD1	1.91687
PRSS1	1.9271
GIMAP4	1.91507
AP1S2	1.91539
CYBB	1.91602
PCSK1N	1.91531
HMGB3	1.9181
SSR4	1.92729
DEFB1	1.93852
CTSB	1.915
TUSC3	1.91745
CLU	1.9155
PLAT	1.91513
FABP5	1.91852
FABP4	1.9213
CA2	1.93544
MAL2	1.92416
COL14A1	1.91902
PTP4A3	1.91534
PRSS3	1.93233
ALDH1A1	1.92062
COL15A1	1.91508
KIF12	1.91627
STOM	1.91695
ENG	1.91523
LCN2	1.91535
EGFL7	1.91503
BICC1	1.91642
SRGN	1.91731
PLAC9	1.91724
ADIRF	1.92714
ACTA2	1.91635
KIF20B	1.9153
HTRA1	1.91529
IFITM1	1.91745
MUC6	1.92272
ADM	1.9153
EHF	1.91571
MS4A6A	1.9151
PTPRCAP	1.91515
CCND1	1.923
STARD10	1.92392
KCNE3	1.91571
SERPINH1	1.91504
MMP7	1.93096
C11orf53	1.91525
TAGLN	1.91687
FXYD2	1.92031
VSIG2	1.91717
TMEM45B	1.9159
VWF	1.91558
CD4	1.91531
C1R	1.91644
CD163	1.9159
CLEC7A	1.91515
APOLD1	1.91723
MGP	1.93591
MGST1	1.915
RERGL	1.91524
LRMP	1.917
TUBA1A	1.91562
NR4A1	1.91504
KRT7	1.91642
KRT8	1.95642
KRT18	1.96334
NDUFA4L2	1.91551
LYZ	1.93282
PTPRB	1.91559
TSPAN8	1.93623
LUM	1.91967
DCN	1.9183
SOCS2	1.9151
C12orf75	1.94388
FLT1	1.91535
RGCC	1.91564
TSC22D1	1.91577
KLF5	1.915
LMO7	1.9153
CLDN10	1.92611
TNFSF13B	1.91534
COL4A1	1.91574
COL4A2	1.91587
MMP14	1.91736
CLEC14A	1.92003
GPX2	1.91968
IFI27	1.92027
SERPINA1	1.91732
SERPINA4	1.91542
SERPINA5	1.91795
TCL1A	1.91536
CKB	1.91726
CRIP1	1.91667
DUOX2	1.91541
GATM	1.91908
C15orf48	1.91536
CCNB2	1.91609
HOMER2	1.91545
TMEM204	1.91515
MYH11	1.9161
TMC5	1.91588
GP2	1.91803
NUPR1	1.91552
CORO1A	1.91518
MT1E	1.93617
MT1F	1.91935
MT1G	1.92555
HERPUD1	1.91544
CDH5	1.91639
NQO1	1.92565
COTL1	1.91515
SERPINF1	1.91696
TM4SF5	1.91503
CD68	1.91573
TMEM88	1.91498
TNFRSF13B	1.91515
MFAP4	1.91606
CCL2	1.91518
CCL5	1.91811
CCL4	1.91733
PPP1R1B	1.92891
TOP2A	1.91631
RAMP2	1.91867
COL1A1	1.91644
KPNA2	1.91585
SOX9	1.93358
BIRC5	1.91552
SOCS3	1.91587
CD93	1.91519
MYL9	1.91608
SDC4	1.92153
WFDC2	1.91916
PMEPA1	1.91503
CTSZ	1.91566
SOX18	1.91497
PLVAP	1.91798
PDE4C	1.918
FXYD3	1.92876
FXYD1	1.91645
LSR	1.91995
DMKN	1.92666
HSPB6	1.9165
HCST	1.91496
TYROBP	1.92325
PPP1R14A	1.91527
C19orf33	1.91827
LGALS4	1.93834
CEACAM5	1.91666
APOC1	1.91843
TNNT1	1.91585
UBE2S	1.91537
CLDN5	1.91591
TIMP3	1.91886
LGALS1	1.91717
FBLN1	1.91606
ADAMTS1	1.92541
FAM3B	1.91958
TFF3	1.92238
TFF2	1.91801
TFF1	1.92353
CSTB	1.91701
ITGB2	1.91506
COL6A2	1.91512
CTRC	1.91867
CELA2A	1.91638
CELA3B	1.915
CELA3A	1.91907
AMY2A	1.91981
CLPS	1.91661
CPA2	1.9159
CPA1	1.91777
PNLIP	1.92132
PNLIPRP1	1.91515
CTRL	1.91792
CTRB2	1.91658
CTRB1	1.92207
SYCN	1.91944
